1 **Title: Cross-Ancestry Investigation of Venous Thromboembolism Genomic Predictors**

2  
3 Florian Thibord PhD<sup>1,2\*</sup>, Derek Klarin MD<sup>3\*</sup>, Jennifer A. Brody BA<sup>4</sup>, Ming-Huei Chen PhD<sup>1,2</sup>,  
4 Michael G. Levin MD<sup>5,6</sup>, Daniel I. Chasman PhD<sup>7,8</sup>, Ellen L. Goode PhD MPH<sup>9</sup>, Kristian Hveem  
5 PhD<sup>10,11</sup>, Maris Teder-Laving MSc<sup>12</sup>, Angel Martinez-Perez MSc<sup>13</sup>, Dylan Aïssi PhD<sup>14,15</sup>, Delphine  
6 Daian-Bacq PhD<sup>16,17</sup>, Kaoru Ito PhD MD<sup>18</sup>, Pradeep Natarajan MD MMSc<sup>19,20,21</sup>, Pamela L. Lutsey  
7 PhD<sup>22</sup>, Girish N. Nadkarni MD MPH<sup>23,24,25</sup>, Gabriel Cuellar-Partida PhD<sup>26</sup>, Brooke N. Wolford  
8 PhD<sup>27</sup>, Jack W. Pattee PhD<sup>28,29</sup>, Charles Kooperberg PhD<sup>30</sup>, Sigrid K. Braekkan PhD<sup>31,32</sup>, Ruifang  
9 Li-Gao PhD<sup>33</sup>, Noemie Saut PhD<sup>34</sup>, Corriene Sept PhD<sup>35</sup>, Marine Germain MS<sup>14,15,17</sup>, Renae L.  
10 Judy MS<sup>36</sup>, Kerri L. Wiggins MS RD<sup>4</sup>, Darae Ko MD<sup>37,2</sup>, Christopher O'Donnell MD MPH<sup>38</sup>, Kent D.  
11 Taylor PhD<sup>39</sup>, Franco Giulianini PhD<sup>7</sup>, Mariza De Andrade PhD<sup>9</sup>, Therese H. Nøst PhD<sup>11</sup>, Anne  
12 Boland PhD<sup>16,17</sup>, Jean-Philippe Empana PhD<sup>40,41</sup>, Satoshi Koyama PhD MD<sup>18,42,19</sup>, Thomas  
13 Gilliland MD<sup>19,42,21</sup>, Ron Do PhD<sup>23,24,43</sup>, Xin Wang PhD<sup>26</sup>, Wei Zhou PhD<sup>44</sup>, Jose Manuel Soria  
14 PhD<sup>13</sup>, Juan Carlos Souto MD PhD<sup>45,13</sup>, Nathan Pankratz PhD<sup>46</sup>, Jeffery Haessler MS<sup>30</sup>, Kristian  
15 Hindberg PhD<sup>31</sup>, Frits R. Rosendaal MD PhD<sup>47</sup>, Constance Turman MS<sup>35</sup>, Robert Olaso PhD<sup>16,17</sup>,  
16 Rachel L. Kember MSc PhD<sup>48</sup>, Traci M. Bartz MS<sup>49</sup>, Julie A. Lynch PhD RN MBA<sup>50,51</sup>, Susan R.  
17 Heckbert MD MPH<sup>52</sup>, Sebastian M. Armasu MS<sup>9</sup>, Ben Brumpton PhD<sup>11</sup>, David M. Smadja MD  
18 PhD<sup>53,54</sup>, Xavier Jouven MD PhD<sup>40,41</sup>, Issei Komuro PhD MD<sup>55</sup>, Katharine Clapham MD<sup>56,20,21</sup>, Ruth  
19 J.F. Loos PhD<sup>23</sup>, Cristen Willer PhD<sup>27</sup>, Maria Sabater-Lleal PhD<sup>13,57</sup>, James S. Pankow PhD<sup>22</sup>,  
20 Alexander P. Reiner MD MSc<sup>58,30</sup>, Vania M. Morelli MD PhD<sup>31,32</sup>, Paul M. Ridker MD MPH<sup>7,8</sup>,  
21 Astrid van Hylckama Vlieg PhD<sup>47</sup>, Jean-François Deleuze PhD<sup>16,59,60</sup>, Peter Kraft PhD<sup>35</sup>, Daniel J.  
22 Rader MD<sup>61</sup>, Barbara McKnight PhD<sup>49</sup>, Global Biobank Meta-Analysis Initiative, Estonian Biobank  
23 Research Team, 23andMe Research Team, Kyung Min Lee PhD<sup>50</sup>, Bruce M. Psaty MD PhD<sup>4,62,63</sup>,  
24 Anne Heidi Skogholt PhD<sup>11</sup>, Joseph Emmerich MD PhD<sup>64,65</sup>, Pierre Suchon MD PhD<sup>34,66</sup>, Biobank  
25 Japan<sup>67</sup>, Stephen S. Rich PhD<sup>68</sup>, Ha My T. Vy PhD<sup>23,24</sup>, Weihong Tang MD PhD<sup>69</sup>, Rebecca D.  
26 Jackson MD<sup>70</sup>, John-Bjarne Hansen MD PhD<sup>31,32</sup>, Pierre-Emmanuel Morange MD PhD<sup>34,66</sup>,  
27 Christopher Kabrhel MD MPH<sup>71,72</sup>, David-Alexandre Tréguët PhD<sup>14,15,17\*</sup>, Scott Damrauer  
28 MD<sup>6\*</sup>, Andrew D. Johnson PhD<sup>1,2\*</sup>, Nicholas L. Smith PhD<sup>49,73\*</sup>

29  
30 \*Denotes equal contribution

31  
32 <sup>1</sup>Population Sciences Branch, Division of Intramural Research, National Heart, Lung and Blood  
33 Institute, 73 Mt. Wayte, Suite #2, Framingham, MA, 01702, USA,

34 <sup>2</sup>The Framingham Heart Study, Boston University and NHLBI, 73 Mt. Wayte Ave, Suite #2,  
35 Framingham, MA, 01702, USA,

36 <sup>3</sup>Division of Vascular Surgery, Stanford University School of Medicine, Palo Alto, CA, 94305,  
37 USA,

38 <sup>4</sup>Cardiovascular Health Research Unit, Department of Medicine, University of Washington, 1730  
39 Minor Ave, Suite 1360, Seattle, WA, 98101, USA,

40 <sup>5</sup>Division of Cardiovascular Medicine, Department of Medicine, University of Pennsylvania, 3400  
41 Spruce Street, PA, 19104, USA,

42 <sup>6</sup>Medicine, Copora Michael J. Crescenz Philadelphia VA Medical Center, 3900 Woodland Ave,  
43 PA, 19104, USA,

- 44 <sup>7</sup>Division of Preventive Medicine, Brigham and Women's Hospital, 900 Commonwealth Ave,  
45 Boston, MA, 02215, USA,  
46 <sup>8</sup>Harvard Medical School, Boston, MA, 02115, USA,  
47 <sup>9</sup>Department of Quantitative Health Sciences, Mayo Clinic, 200 First Street SW, Rochester, MN,  
48 55905, USA,  
49 <sup>10</sup>HUNT Research Center, Department of Public Health and Nursing, Norwegian University of  
50 Science and Technology, Forskningsvegen 2, Levanger, 7600, Norway,  
51 <sup>11</sup>K.G. Jebsen Centre for Genetic Epidemiology, Department of Public Health and Nursing,  
52 Norwegian University of Science and Technology, Håkon Jarls gate 11, Trondheim, 7030,  
53 Norway,  
54 <sup>12</sup>Institute of Genomics, University of Tartu, Riia 23b, Tartu, Tartu, 51010, Estonia,  
55 <sup>13</sup>Genomics of Complex Disease Unit, Sant Pau Biomedical Research Institute (IIB Sant Pau),  
56 Barcelona, Spain, St Quinti 77-79, Barcelona, 8041, Spain,  
57 <sup>14</sup>Bordeaux Population Health Research Center, University of Bordeaux, 146 rue Léo Saignat,  
58 Bordeaux, 33076, France,  
59 <sup>15</sup>UMR1219, INSERM, 146 rue Léo Saignat, Bordeaux, 33076, France,  
60 <sup>16</sup>Centre National de Recherche en Génomique Humaine, CEA, Université Paris-Saclay, 2 Rue  
61 Gaston Crémieux, Evry, 91057, France,  
62 <sup>17</sup>Laboratory of Excellence on Medical Genomics, France,  
63 <sup>18</sup>Laboratory for Cardiovascular Genomics and Informatics, RIKEN Center for Integrative Medical  
64 Sciences,, 1-7-22 Suehirocho, Tsurumi-ku, Yokohama, Kanagawa, 230-0045, Japan,  
65 <sup>19</sup>Cardiovascular Research Center, Massachusetts General Hospital, 185 Cambridge Street,  
66 Boston, MA, 02446, USA,  
67 <sup>20</sup>Program in Medical and Population Genetics and the Cardiovascular Disease Initiative, Broad  
68 Institute of Harvard & MIT, 75 Ames St, Cambridge, MA, USA,  
69 <sup>21</sup>Department of Medicine, Harvard Medical School, Shattuck St, Boston, MA, USA,  
70 <sup>22</sup>Division of Epidemiology and Community Health, University of Minnesota, 1300 South Second  
71 Street, MN, 55454, USA,  
72 <sup>23</sup>The Charles Bronfman Institute for Personalized Medicine, Icahn School of Medicine at Mount  
73 Sinai, 1 Gustave L. Levy Pl, New York, NY, 10029, USA,  
74 <sup>24</sup>Department of Genetics and Genomic Sciences, Icahn School of Medicine at Mount Sinai, 1  
75 Gustave L. Levy Pl, New York, NY, 10029, USA,  
76 <sup>25</sup>Division of Nephrology, Department of Medicine, Icahn School of Medicine at Mount Sinai, 1  
77 Gustave L. Levy Pl, New York, NY, 10029, USA,  
78 <sup>26</sup>23andMe, Inc., 223 N Mathilda Ave, CA, 94086, USA,  
79 <sup>27</sup>Department of Computational Medicine and Bioinformatics, University of Michigan, Ann  
80 Arbor, MI, 48109, USA,  
81 <sup>28</sup>Division of Biostatistics, University of Minnesota, 420 Delaware St. SE, MN, 55455, USA,  
82 <sup>29</sup>Center for Innovative Design & Analysis and Department of Biostatistics & Informatics,  
83 Colorado School of Public Health, 13001 East 17th Place, CO, 80045, USA,  
84 <sup>30</sup>Division of Public Health Sciences, Fred Hutchinson Cancer Research Center, 1100 Fairview  
85 Ave N, Seattle, WA, 98109, USA,  
86 <sup>31</sup>Thrombosis Research Center (TREC), UiT - The Arctic University of Norway, Universitetsvegen  
87 57, Tromsø, 9037, Norway,

- 88 <sup>32</sup>Division of internal medicine, University Hospital of North Norway, Tromsø, 9038, Norway,  
89 <sup>33</sup>Clinical Epidemiology, Leiden University Medical Center, PO Box 9600, 2300 RC, The  
90 Netherlands,  
91 <sup>34</sup>Hematology Laboratory, La Timone University Hospital of Marseille, 264 Rue Saint-Pierre,  
92 Marseille, 13385, France,  
93 <sup>35</sup>Department of Epidemiology, Harvard TH Chan Harvard School of Public Health, 655  
94 Huntington Ave., Building II, Boston, MA, 02115, USA,  
95 <sup>36</sup>Surgery, University of Pennsylvania, 3401 Walnut Street, PA, 19104, USA,  
96 <sup>37</sup>Section of Cardiovascular Medicine, Boston University School of Medicine, 85 East Newton  
97 Street, Boston, MA, 02118, USA,  
98 <sup>38</sup>Cardiology, VA Boston Healthcare System, Boston, MA, 02130, USA,  
99 <sup>39</sup>Institute for Translational Genomics and Population Sciences, The Lundquist Institute for  
100 Biomedical Innovation, 1124 W Carson St., Torrance, CA 90502, CA, USA,  
101 <sup>40</sup>Integrative Epidemiology of cardiovascular diseases, Université Paris Descartes, Sorbonne  
102 Paris Cité, 56 rue Leblanc, Paris, 75015, France,  
103 <sup>41</sup>Paris Cardiovascular Research Center, Inserm U970, Université Paris Descartes, Sorbonne  
104 Paris Cité, 20 rue Leblanc, Paris, 75015, France,  
105 <sup>42</sup>Program in Medical and Population Genetics and the Cardiovascular Disease Initiative, Broad  
106 Institute of Harvard & MIT, 75 Ames St, Cambridge, MA, 02142, USA,  
107 <sup>43</sup>BioMe Phenomics Center, Icahn School of Medicine at Mount Sinai, 1 Gustave L. Levy Pl, New  
108 York, NY, 10029, USA,  
109 <sup>44</sup>Analytic and Translational Genetics Unit, Department of Medicine, Massachusetts General  
110 Hospital, 55 Fruit Street, Boston, MA, 02114, USA,  
111 <sup>45</sup>Unit of Thrombosis and Hemostasis, Hospital de la Santa Creu i Sant Pau, St Quinti 89,  
112 Barcelona, 8041, Spain,  
113 <sup>46</sup>Department of Laboratory Medicine and Pathology, University of Minnesota, 420 Delaware St.  
114 SE, MN, 55455, USA,  
115 <sup>47</sup>Clinical Epidemiology, Leiden University Medical Center, PO Box 9600, Leiden, The  
116 Netherlands,  
117 <sup>48</sup>Psychiatry, University of Pennsylvania, 3401 Walnut Street, PA, 19104, USA,  
118 <sup>49</sup>Cardiovascular Health Research Unit, Departments of Biostatistics and Medicine, University of  
119 Washington, 1730 Minor Ave, Suite 1360, Seattle, WA, 98101, USA,  
120 <sup>50</sup>VA Informatics & Computing Infrastructure, VA Salt Lake City Healthcare System, 500 Foothills  
121 Drive, UT, 01730, USA,  
122 <sup>51</sup>Epidemiology, University of Utah, 500 Foothills Drive, UT, 01730, USA,  
123 <sup>52</sup>Department of Epidemiology, University of Washington, 1730 Minor Ave, Suite 1360, Seattle,  
124 WA, 98101, USA,  
125 <sup>53</sup>Hematology Department and Biosurgical Research Lab (Carpentier Foundation), European  
126 Georges Pompidou Hospital, Assistance Publique Hôpitaux de Paris, 20 rue Leblanc, Paris,  
127 75015, France,  
128 <sup>54</sup>Innovative Therapies in Haemostasis, INSERM, Université de Paris, 4 avenue de l'Observatoire,  
129 Paris, 75270, France,  
130 <sup>55</sup>Department of Cardiovascular Medicine, University of Tokyo, 7-3-1, Hongo, Bunkyo-ku, Tokyo,  
131 Tokyo, 113-8655, Japan,

132 <sup>56</sup>Division of Cardiovascular Medicine, Brigham & Women's Hospital, MA, USA,  
133 <sup>57</sup>Cardiovascular Medicine Unit, Department of Medicine, Karolinska Institutet, Center for  
134 Molecular Medicine, Stockholm, 17176, Sweden,  
135 <sup>58</sup>Department of Epidemiology, University of Washington, 3980 15th Ave NE, WA, 98195, USA,  
136 <sup>59</sup>Centre D'Etude du Polymorphisme Humain, Fondation Jean Dausset, 27 rue Juliette Dodu,  
137 Paris, 75010, France,  
138 <sup>60</sup>Laboratory of Excellence on Medical Genomics,  
139 <sup>61</sup>Cardiology, Medical Genetics, University of Pennsylvania, 3401 Walnut Street, PA, 19104,  
140 USA,  
141 <sup>62</sup>Department of Epidemiology, University of Washington, 1730 Minor Ave, Suite #1360, Seattle,  
142 WA, 98101, USA,  
143 <sup>63</sup>Department of Health Systems and Population Health, University of Washington, 1730 Minor  
144 Ave, Suite #1360, Seattle, WA, USA,  
145 <sup>64</sup>Department of vascular medicine, Paris Saint-Joseph Hospital Group, University of Paris, 185  
146 rue Raymond Losserand, Paris, 75674, France,  
147 <sup>65</sup>UMR1153, INSERM CRESS, 185 rue Raymond Losserand, Paris, 75674, France,  
148 <sup>66</sup>C2VN, INSERM, INRAE, Aix-Marseille University, 27, bd Jean Moulin, Marseille, 13385, France,  
149 <sup>67</sup>Institute of Medical Science, University of Tokyo, 4-6-1 Shirokanedai, Minato-ku, Tokyo,  
150 Tokyo, 108-8639, Japan,  
151 <sup>68</sup>Center for Public Health Genomics, University of Virginia, 3242 West Complex, Charlottesville,  
152 VA, 22908-0717, USA,  
153 <sup>69</sup>Division of Epidemiology and Community Health, University of Minnesota, 1300 South Second  
154 Street, MN, 55454, USA,  
155 <sup>70</sup>College of Medicine, Ohio State University, 376 W. 10th Ave, Columbus, OH, 43210, USA,  
156 <sup>71</sup>Emergency Medicine, Massachusetts General Hospital, Zero Emerson Place, Suite 3B, Boston,  
157 MA, 02114, USA,  
158 <sup>72</sup>Emergency Medicine, Harvard Medical School, Zero Emerson Place, Suite 3B, Boston, 02114,  
159 MA,  
160 <sup>73</sup>Department of Surgery, Perelman School of Medicine University of Pennsylvania,  
161 Philadelphia, PA, 19104, USA  
162  
163 **Contact:** Nicholas L. Smith, Department of Epidemiology, University of Washington,  
164 Seattle WA, 98195, USA. (nlsmith@u.washington.edu)  
165  
166 **Keywords:** venous thrombosis, venous thromboembolism, genetic, genome-wide  
167 association studies, transcriptome-wide association study  
168  
169 **Version:** February 17, 2022

170 **ABSTRACT**

171

172 Venous thromboembolism (VTE) is a complex disease with environmental and genetic  
173 determinants. We present new cross-ancestry meta-analyzed genome-wide association study  
174 (GWAS) results from 30 studies, with replication of novel loci and their characterization through  
175 *in silico* genomic interrogations. In our initial genetic discovery effort that included 55,330  
176 participants with VTE (47,822 European, 6,320 African, and 1,188 Hispanic ancestry), we  
177 identified 48 novel associations of which 34 replicated after correction for multiple testing. In  
178 our combined discovery-replication analysis (81,669 VTE participants) and ancestry-stratified  
179 meta-analyses (European, African and Hispanic), we identified another 44 novel associations,  
180 which are new candidate VTE-associated loci requiring replication. In total, across all GWAS  
181 meta-analyses, we identified 135 independent genomic loci significantly associated with VTE  
182 risk. We also identified 31 novel transcript associations in transcriptome-wide association  
183 studies and 8 novel candidate genes with protein QTL Mendelian randomization analyses. *In*  
184 *silico* interrogations of hemostasis and hematology traits and a large phenome-wide association  
185 analysis of the 135 novel GWAS loci provided insights to biological pathways contributing to  
186 VTE, indicating that some loci may contribute to VTE through well-characterized coagulation  
187 pathways while others provide new data on the role of hematology traits, particularly platelet  
188 function. Many of the replicated loci are outside of known or currently hypothesized pathways  
189 to thrombosis. In summary, these findings highlight new pathways to thrombosis and provide  
190 novel molecules that may be useful in the development of antithrombosis treatments with  
191 reduced risk of bleeds.

## 192 INTRODUCTION

193 Venous thrombosis is a vascular event resulting from an imbalance in the regulation of  
194 hemostasis, with subsequent pathologic coagulation and vascular thrombosis formation.  
195 Clinically, venous thrombosis can manifest as deep vein thrombosis (DVT), when occurring in  
196 the deep veins primarily of the legs and trunk, or as a pulmonary embolism (PE), when the  
197 thrombus embolizes and obstructs the pulmonary arteries. Collectively, these events are known  
198 as venous thromboembolism (VTE), a life-threatening condition with an incidence of 1-2 events  
199 per 1,000 person-years.<sup>1-3</sup> VTE is a complex disease with both environmental and genetic  
200 determinants. Family studies, candidate-gene approaches, and early genome-wide association  
201 studies (GWAS) primarily identified genetic risk factors in loci with well characterized effects on  
202 coagulation (*F2, F5, F11, FGG, ABO, SERPINC1, PROCR, PROC, PROS1*), supporting current  
203 therapeutic strategies that mainly target the coagulation cascade.<sup>4-8</sup> In recent years, larger  
204 GWAS meta-analyses revealed unanticipated loci, such as *SLC44A2*,<sup>9</sup> which was later  
205 characterized as a choline transporter involved in platelet activation,<sup>10</sup> and in the adhesion and  
206 activation of neutrophils.<sup>11,12</sup> Thus, genetic associations with VTE in larger and more diverse  
207 populations may uncover new biological pathways and molecular events contributing to the  
208 disease and potentially help identify novel targets for treatment. Most recently, 2 large efforts  
209 involving up to 30,000 VTE cases, led by the International Network Against Venous Thrombosis  
210 (INVENT) consortium<sup>13</sup> and the Million Veteran Program<sup>14</sup> (MVP), identified up to 43 genetic  
211 loci associated with VTE. To expand discovery of novel VTE risk loci, we conducted a large,  
212 cross-ancestry GWAS meta-analysis involving more than 80,000 VTE cases, along with a  
213 replication of novel loci and their characterization through downstream analyses.

214

## 215 METHODS

### 216 Design and Study Participants

217 The current cross-ancestry GWAS meta-analysis is comprised of new analyses of data from 13  
218 studies, including the Department of Veterans Affairs Million Veteran Program (MVP, version  
219 4),<sup>14</sup> UK Biobank (UKB),<sup>15,16</sup> FinnGen (freeze 5), Estonian Biobank (EGP),<sup>17</sup> Biobank Japan  
220 (BBJ),<sup>18</sup> Mass General Brigham biobank (MGB),<sup>19</sup> BioMe, Penn Medicine BioBank (UPenn),

221 FARIVE,<sup>20</sup> MARTHA12,<sup>21</sup> RETROVE,<sup>22</sup> Multi-Ethnic Study of Atherosclerosis (MESA),<sup>23</sup> and  
222 GAIT2,<sup>24,25</sup> as well as previously published data from the INVENT consortium, a 17 study analysis  
223 of prospective cohorts and case-control data (designated INVENT-2019).<sup>13</sup> A detailed  
224 description of participating studies is provided in supplemental **Table S1**.

225

226 The study design (see **Figure 1**) included a discovery meta-analysis of GWAS summary data  
227 from 4 consortium/studies (INVENT-2019, MVP, FinnGen, EGP) followed by a replication of  
228 discovery loci that exceed the genome-wide significance threshold ( $P < 5.00 \times 10^{-8}$ ). Included in  
229 the replication were the remaining 10 participating studies plus 2 external collaborations that  
230 provided association results for the queried variants: 23andMe<sup>26</sup> and Global Biobank Meta-  
231 Analysis Initiative (GBMI), limiting data to non-overlapping studies with our discovery.<sup>27</sup> The  
232 combined discovery and replication data (with the exception of 23andMe and GBMI) were then  
233 meta-analyzed, and ancestry-stratified meta-analyses were performed for African (AFR)-  
234 ancestry, European (EUR)-ancestry, and Hispanic (HIS) participants to enable further  
235 downstream ancestry-specific analyses, such as fine mapping. Participants from studies  
236 provided written informed consent for use of their genetic and health information for analysis,  
237 and the studies were individually approved by the appropriate Institutional Review Boards (see  
238 **Supplemental Methods**).

239

#### 240 **Study-specific GWAS**

241 Genotyping arrays, imputation panels, and analyses performed by each participating study are  
242 detailed in supplemental **Table S1**. Briefly, studies performed association analyses (logistic  
243 regression analyses or generalized mixed models for case-control studies and Cox regression for  
244 cohort studies) using age and sex as covariates and further adjusting for participant  
245 relatedness, genetic principal components, and study site or other study-specific factors when  
246 applicable.

247

248 For each dataset, quality control was performed using EasyQC<sup>28</sup> to remove variants with  
249 missing information (effect and/or standard error), low imputation quality ( $< 0.3$ ), and rare

250 variants (allele count < 5). For studies missing either imputation quality or variant frequency  
251 (BioMe, UPenn), a filter was added to remove variants with extreme effects ( $|\text{Effect}| > 10$ ).  
252 Indels and marker names were then harmonized across all studies.

253

254 For the X chromosome, all studies performed sex-stratified GWAS, excluding variants from  
255 pseudo-autosomal regions. Results from males and females were then meta-analyzed.

256

### 257 **Discovery, Replication, and Combined GWAS Meta-analyses**

258 All GWAS meta-analyses were conducted with METAL,<sup>29</sup> using a fixed-effects inverse-variance  
259 weighted model. All variants were included and there was no lower minor allele frequency  
260 (MAF) limit beyond study-specific minor allele count. Genome-wide significant variants ( $P <$   
261  $5.00 \times 10^{-8}$ ) were kept if a concordant effect direction was observed in 2 or more studies and  
262 grouped into the same locus if they were within 1Mb. We used the closest gene to the lead  
263 variant to refer to each locus, except at known loci where the causal gene has been previously  
264 identified and is different from the closest gene (such as *PROCR* or *PROS1*). We defined a locus  
265 as novel if a genetic association with VTE has not been previously observed in the region  
266 according to our review of peer-reviewed published reports. We used PhenoGram<sup>30</sup> to visually  
267 represent the genomic position of the loci, their significance in EUR- or AFR-ancestry analyses,  
268 and their discovery status of novel or known.

269

270 Discovery Meta-Analysis: For the discovery cross-ancestry GWAS meta-analysis, we meta-  
271 analyzed data from 4 consortium/studies: INVENT-2019, MVP, FinnGen and EGCUT. Participants  
272 were adult men and women and included 55,330 VTE cases (either DVT and/or PE cases) and  
273 1,081,973 controls of EUR, AFR, or HIS ancestries. At each locus with a genome-wide significant  
274 signal, the lead variant was extracted and tested in an independent replication meta-analysis.

275

276 Replication: The replication GWAS meta-analysis consisted of the remaining 10 participating  
277 studies, as well as 2 external collaborators (GBMI<sup>27</sup> and 23andMe<sup>26</sup>), for a total of 91,230 VTE  
278 cases in replication. Replicating variants from the discovery were defined as those that had



279 concordant effect direction in the discovery and the replication, and reached a Bonferroni-  
280 corrected p-value threshold in the replication population corresponding to the number of  
281 variants tested for replication with a 1-sided hypothesis: p-value threshold =  $[(0.05*2)/\text{number}$   
282 of variants tested for replication] in the replication analysis.

283  
284 Combined GWAS Meta-Analysis and Stratification by Ancestry: We performed a combined,  
285 cross-ancestry GWAS meta-analysis of discovery and replication data using participating studies  
286 with genome-wide summary data. We included variants with  $MAF \geq 0.01$  to maintain adequate  
287 statistical power by reducing the number of low-powered tests since replication was not  
288 available. Genome-wide data from GBMI and 23andMe data were not available and therefore  
289 excluded from combined analyses. We estimated the heterogeneity associated with each  
290 variant using Cochran's Q test and the corresponding  $I^2$  statistic. We assessed the genomic  
291 inflation with the lambda genomic control.<sup>31</sup> We report on variants exceeding the genome-wide  
292 threshold ( $P < 5.00 \times 10^{-8}$ ) and view these as candidate novel loci associated with VTE and  
293 needing future replication.

294  
295 We then stratified the analyses by ancestry and limited strata to EUR, AFR, and HIS ancestries  
296 as the remaining ancestries had too few VTE events to be informative: East Asian (EAS) in BBJ,  
297  $n=507$  VTE events; South Asian (SAS) in UKB,  $n=189$  VTE events. As above, we estimated  
298 heterogeneity and assessed inflation with lambda genomic control; the LD-score intercept was  
299 computed for EUR-ancestry analysis, using the recommended Hapmap3 variants.<sup>32</sup> We report  
300 all additional ancestry-specific variants exceeding the genome-wide threshold ( $P < 5.00 \times 10^{-8}$ )  
301 and view these as ancestry-specific candidate loci associated with VTE and needing future  
302 replication.

303  
304 **Ancestry-Stratified Analyses: Conditional Analyses and Fine-mapping**

305 To estimate the presence of multiple independent signals, we performed conditional analyses  
306 with GCTA-COJO<sup>33</sup> at each locus with significant signals in the EUR- and AFR-ancestry GWAS  
307 meta-analyses. The Trans-Omics for Precision Medicine (TOPMed) trans-ancestry sequence

308 data (freeze 8) was used as reference panel, selecting only EUR-ancestry participants from  
309 TOPMed (N=34,890) for the EUR conditional analyses and AFR-ancestry participants (N=17,322)  
310 for the AFR analyses.<sup>34</sup> GCTA-COJO analyses were not performed for the HIS-ancestry stratum  
311 since a HIS reference panel was not available in TOPMed. Conditional analyses were performed  
312 at each locus, using a window that encompassed at least the genome-wide significant variants  
313 present in the locus with an additional buffer of  $\pm 100$  Kb. A stepwise joint regression model was  
314 used to identify secondary signals with joint p-values  $< 5.00 \times 10^{-8}$  and a linkage disequilibrium  
315 (LD)  $r^2 < 0.2$  with selected variants.

316  
317 In addition, for each locus and for each ancestry-specific GWAS meta-analysis, we produced  
318 forest plots with the *forestplot* R library, and regional association plots with the *RACER*<sup>35</sup> and  
319 *LDlinkR*<sup>36</sup> R libraries, to visually inspect the local genetic architecture (available as supplemental  
320 **Figures 1-8**). We used the 1000 Genomes project EUR-ancestry dataset as reference panel to  
321 infer LD patterns for the EUR-ancestry participants and overall meta-analyses and the 1000  
322 Genomes project AFR-ancestry reference panel for the AFR-ancestry meta-analysis.  
323 Furthermore, at each locus where distinct lead variants were identified in the different meta-  
324 analyses, we also extracted the lead variant from each analysis, as well as additional  
325 independent variants identified by the conditional analyses, and computed the LD between  
326 each variant (using both EUR- and AFR-ancestry reference panels) to verify the independence of  
327 the signals.

328  
329 **Transcriptome-wide Association Studies (TWAS)**

330 We performed TWAS with the FUSION pipeline to accomplish 2 tasks: (1) prioritize genes for  
331 those genome-significant signals with ambiguous gene associations; and (2) identify new  
332 candidate loci by linking gene expression with VTE risk using GWAS results not reaching  
333 genome-wide significance.<sup>37</sup> This analysis was performed using the EUR-ancestry autosomal  
334 GWAS meta-analysis results, since FUSION depends on a EUR-ancestry LD reference panel (from  
335 1000 genomes<sup>38</sup>) and does not include data for chromosome X. We first performed a series of  
336 single-tissue TWAS using gene expression from eQTL datasets relevant to blood and thrombosis

337 disorders: whole blood, liver, lung, and spleen from GTEx v8,<sup>39</sup> whole blood from the Young  
338 Finn Study,<sup>40</sup> and peripheral blood from the Netherlands Twins Register.<sup>41</sup> We then also  
339 employed an analysis using cross-tissue weights computed from GTEx v8 tissues, available as 3  
340 canonical vectors (sCCA1-3) that capture most of the gene expression.<sup>42</sup> All associations  
341 reaching a Bonferroni corrected significance threshold corresponding to the number of gene  
342 tested ( $N=14,219$ ,  $P < 3.52 \times 10^{-6}$ ) were deemed statistically significant. As several genes can be  
343 associated at the same locus, the TWAS results were subjected to a conditional analysis  
344 implemented in FUSION to select genes that remained conditionally independent. For each  
345 tissue, we further performed a colocalization test with COLOC<sup>43</sup> for all significant associations,  
346 to identify and select genetic signals shared by both VTE risk and gene expression with high  
347 posterior probability ( $PP4 > 0.75$ ). Selected genes located farther than 200kb from genetic loci  
348 identified in the meta-analyses were considered novel candidate VTE genes.

349

#### 350 **Protein QTL Mendelian Randomization**

351 Using the combined, cross-ancestry VTE GWAS meta-analysis results, we performed a  
352 proteome Mendelian randomization (MR) analysis with high-confidence genomic instruments  
353 corresponding to protein QTL (pQTL) for 1,216 circulating plasma proteins that passed  
354 consistency and pleiotropy filters, as previously described.<sup>44</sup> When 2 or more genetic  
355 instruments were available for the exposure-outcome pairs, we performed inverse variance-  
356 weighted MR. If a single genetic variant was present, Wald-ratio MR was used instead. In  
357 addition, when multiple SOMAmers for a protein were available, which was the case for 40  
358 proteins, tests were conducted separately for each SOMAmer. To account for multiple testing,  
359 associations passing the Bonferroni corrected threshold corresponding to the number of  
360 SOMAmers tested ( $N=1,256$ ,  $P < 3.98 \times 10^{-5}$ ) were considered statistically significant.

361

#### 362 **Association of VTE Loci with Hemostasis and Hematology Traits**

363 We conducted a series of *in silico* investigations involving hemostasis and hematology traits to  
364 better characterize the VTE-associated variants from the GWAS meta-analyses. To better  
365 understand if novel VTE-associated variants might operate through hemostasis pathways, we

366 extracted associations from published GWAS of 10 hemostatic traits: fibrinogen;<sup>45</sup> fibrin D-  
367 dimer;<sup>46</sup> coagulation factors VII (FVII),<sup>47</sup> VIII (FVIII),<sup>48</sup> and XI (FXI);<sup>49</sup> von Willebrand factor  
368 (vWF);<sup>48</sup> tissue plasminogen activator (tPA);<sup>50</sup> plasminogen-activator inhibitor 1 (PAI-1);<sup>51</sup>  
369 activated partial thromboplastin time (aPTT); and prothrombin time (PT).<sup>52</sup> Since each variant-  
370 association was investigated in 10 hemostasis traits, we set a p-value threshold of 0.005  
371 (0.05/10 traits tested for each lead variant of a locus) to separate associations of interest from  
372 other associations.

373

374 Similarly, we extracted associations with complete blood count (CBC) measures using summary  
375 data from nearly 750,000 individuals on 15 leukocyte, erythrocyte, and platelet traits.<sup>53</sup> Given  
376 the large sample size and high statistical power of these analyses, we used a more stringent  
377 threshold of interest that was a Bonferroni correction corresponding to the number of look-ups  
378 performed ( $P < 1.92 \times 10^{-5}$ ).

379

### 380 **Phenome-wide Association Testing**

381 To explore associations between VTE-associated variants and other traits agnostically, we  
382 performed a phenome-wide association study (PheWAS) using the MRC IEU infrastructure,<sup>54</sup>  
383 which included the datasets from the 1,500 UKB analyses performed by the Neale lab on  
384 337,000 individuals of British ancestry (pheWAS source codes: ukb-a and ukb-d). Only variants  
385 of interest reaching genome-wide significance ( $P < 5.00 \times 10^{-8}$ ) were extracted for each trait and  
386 presented.

387

## 388 **RESULTS**

### 389 **Discovery Cross-Ancestry Meta-analysis and Replication**

390 The primary cross-ancestry discovery analysis was based on 4 contributing consortium/studies  
391 (INVENT-2019, MVP, FinnGen, EGP) and included 55,330 participants among 3 ancestry groups  
392 with VTE (47,822 EUR, 6,320 AFR, and 1,188 HIS) and 1,081,973 participants without VTE  
393 (918,195 EUR, 118,144 AFR, and 45,634 HIS). Over the 22 autosomal and X chromosomes, 35.5  
394 million variants were analyzed, and the observed genomic inflation factor was 1.06. We

395 identified 10,493 variants reaching genome-wide significance, corresponding to 85 loci, of  
396 which 48 have not been identified in previous genetic studies of VTE (see supplemental **Table**  
397 **S2**).

398

399 We tested these 85 variants for replication in 91,230 cases and 3,322,939 controls from the  
400 independent replication data. After meta-analyzing the results of these 85 tests in the  
401 replication population, we identified 83 variants with a concordant effect direction between the  
402 discovery and the replication, of which 68 replicated at the 1-sided Bonferroni corrected  
403 significance threshold ( $p < 0.1/83 = 0.0012$ ) (**Table 1, Figure 2**, supplemental **Table S2**). The  
404 successfully replicated signals corresponded to 34 known and 34 novel loci. Among the 34 novel  
405 loci that replicated, heterogeneity was minimal (heterogeneity  $P > 0.05$ ), odds ratios (ORs)  
406 ranged between 0.84-0.98 and 1.03-1.18, and MAFs were all  $\geq 0.021$ . The majority of variants  
407 were gene-centric (4 exonic, 16 intronic, and 3 in 3' or 5' UTR regions or immediately  
408 downstream), 3 were linked to intronic non-coding RNA, and 8 were considered intergenic. The  
409 novel replicated variants were at the following loci (in chromosomal order): *H6PD/SPSB1*,  
410 *TENT5C*, *TRIM58*, *CALCRL* (near *TFPI*), *CPS1*, *SERPINE2*, *PIK3CB/LINC01391*, *MECOM*,  
411 *LINC01968/XXYLT1*, *SEC31A*, *ARHGAP24*, *LNPEP*, *ILRUN*, *AGPAT5/XKR5*, *ZNF367/HABP4*,  
412 *MIR1265/FAM107B*, *ZMIZ1*, *PLCE1*, *ST3GAL4*, *A2ML1/PHC1*, *COPZ1*, *SH2B3*, *RCOR1*, *MAP1A*,  
413 *RORA-AS1*, *HSD3B7*, *ZFPM1*, *ALOX12-AS1*, *MAPT-AS1*, *CEP112/APOH*, *RFX2*, *GIPR*, *FUT2*, and  
414 *SYN3*. Among the 17 variants and their associated loci that failed replication, 14 were novel and  
415 remain candidate loci that merit additional replication while 3 were known loci: *PROS1*, *JAK2*,  
416 and *STAB2*.

417

### 418 **Combined Cross-Ancestry GWAS Meta-analysis and Ancestry-Stratified Results**

419 Combined: The combined, cross-ancestry meta-analysis of the studies with genome-wide  
420 markers included 81,669 individuals with VTE and 1,426,717 individuals without VTE. We  
421 analyzed 19.1 million common variants ( $MAF \geq 0.01$ ) and observed a genomic factor of 1.16  
422 which is slightly elevated but expected for large scale meta-analyses of polygenic traits.<sup>55</sup> We  
423 identified 16,550 variants reaching genome-wide significance located in 110 loci, of which 41

424 were not observed in the discovery analysis (supplemental **Table S3, Figure 2**). Of these 41  
425 additional loci, 1 corresponded to a common variant at the known *SERPINC1* locus (rs6695940)  
426 which encodes antithrombin, 4 were previously identified in the INVENT-2019<sup>13</sup> or MVP<sup>14</sup> meta-  
427 analyses at the *PEPD*, *ABCA5*, *MPHOSPH9*, and *ARID4A* loci, and 1 was a known pathogenic  
428 missense variant located in *SERPINA1* (rs28929474, p.Glu366Lys).<sup>56</sup> The remaining 35 loci were  
429 novel associations and are presented in **Table 2**. Among the 35 candidate loci, all had ORs  
430 within the range of 0.93-0.97 and 1.03-1.15 and had a minimum MAF of 0.021. The majority of  
431 the variants were gene-centric (18 intronic and 3 in 3' UTR regions), 3 were intronic in non-  
432 coding RNA and 11 were considered intergenic. These candidate loci included (in chromosomal  
433 order): *ARID1A*, *AK5*, *CELSR2*, *FALEC/ADAMTSL4*, *DCST2*, *FCER1G*, *CFHR1/CFHR4*, *LINC01800*,  
434 *RFTN2/MARS2*, *LINC02029/LINC00880*, *AFAP1*, *REST*, *ARHGEF28*, *HSPA4*, *CARMIL1*, *HCG9*,  
435 *JAZF1-AS1*, *LOC101929128/LOC157273*, *ENTPD4/SLC25A37*, *RBPMS*, *ANGPT1*, *MLLT10*,  
436 *RAB18/MKX*, *SOX6*, *MS4A4A/MS4A6E*, *ZBTB16*, *SNX19*, *LINC02324/MIR4708*,  
437 *LINC00924/LOC105369212*, *NDE1*, *DHODH/HP*, *CFDP1*, *C16orf74*, *TAOK1*, and *RAB4B*.

438  
439 European Ancestry: The EUR-ancestry meta-analysis, which included 71,771 participants with  
440 VTE and 1,059,740 participants without VTE, had a lambda genomic factor of 1.22. As  
441 population stratification might be introduced by founder effects in Finnish participants from  
442 FinnGen, we did a sensitivity analysis by removing this cohort, and observed a similar genomic  
443 factor of 1.19. We also observed an LD-score intercept of 1.07, indicating an inflation mainly  
444 due to polygenic architecture. Out of 11.1 million variants analyzed, 16,867 were genome-wide  
445 significant and clustered into 100 regions, of which 7 did not overlap with loci identified in the  
446 discovery or overall meta-analysis: *FAM168A*, *AKIRIN2*, *LINC02103*, *LINC02652*, *SLC39A8*, *IRAG1*,  
447 and *RGS18* (**Table 2, Figure 2**, supplemental **Table S4**). For these 7 additional candidate loci,  
448 the ORs ranged from 0.94-0.97 to 1.04-1.07 and the minimum MAF was 0.058.

449  
450 Conditional analyses were performed with GCTA COJO at each of the 100 significant loci and  
451 revealed a subset of 21 loci with multiple independent signals (supplemental **Table S5**). These  
452 included 3 within novel loci: rs39840 (intronic, in *ERAP1*), rs28712647 (upstream of *NEURL4*,

453 near *ALOX12*) and rs7412 (nonsynonymous, in *APOE*). At the remaining 18 known VTE loci,  
454 secondary signals at 5 loci had been previously observed, or were in LD with previously  
455 identified signals, at *F5*, *F11*, *ABO*, *F2* and *VWF*,<sup>13</sup> while the rest were located at *EPHA3*, *PROS1*,  
456 *FGG*, the *HLA* region, *SCARA5*, *TSPAN15*, *FADS2B*, *FADS1*, *STAB2*, *F10*, *PLCG2*, *THBD*, and  
457 *A4GALT*.

458  
459 African Ancestry: The AFR-ancestry meta-analysis included 7,482 participants with VTE and  
460 129,975 participants without VTE from 7 cohorts and had a genomic inflation factor of 1.05.  
461 Here, 17.1 million variants were analyzed, of which 752 were genome-wide significant and  
462 located within 13 loci, of which 2 corresponded to novel ancestry-specific signals at *RBFOX1* (OR  
463 = 0.56; MAF = 0.04) and *COL6A2* (OR = 2.16; MAF = 0.011) (**Table 2, Figure 2**, supplemental  
464 **Table S6**).

465  
466 Conditional analyses were performed with GCTA COJO at each of the 13 significant loci revealed  
467 3 loci with additional independent signals (supplemental **Table S7**) at *EPHA3* (with LD  $r^2 < 0.02$   
468 with the primary and secondary EUR signals, using the 1000 Genomes AFR reference LD panel),  
469 *PROS1* (rs6795524, LD  $r^2 = 0.94$  with rs28479320, the lead variant from the combined meta-  
470 analysis located in *ARL13B*), and *ABO* (several signals).

471  
472 Hispanic Ancestry: The HIS-ancestry meta-analysis included 1,720 participants with VTE and  
473 57,367 participants without VTE from 4 cohorts and had a genomic inflation factor of 1.02. We  
474 analyzed 11.1 million variants, of which 58 were genome-wide significant, all located at the *ABO*  
475 locus with rs2519093 as lead variant (MAF = 0.15, OR = 1.49,  $P = 3.08 \times 10^{-15}$ ).

476  
477 Comparison of Ancestry-Specific and Cross-Ancestry Meta-Analysis Results: We then  
478 investigated the lead variants from the AFR- and EUR-ancestry meta-analyses at the 11 loci (all  
479 known) identified in both analyses. At 5 loci (*PROC*, *EPHA3*, *PROS1*, *VWF* and *THBD*), none of the  
480 AFR lead variants were available in the EUR analyses, due to their low frequency in EUR (MAF <  
481 0.0006 for all 5 lead variants in non-Finnish Europeans according to gnomAD<sup>57</sup>). At the

482 remaining 6 loci, the lead variants from the AFR analysis were also genome wide significant in  
483 the EUR analysis, and shared similar effect sizes.

484

485 Across the discovery, combined, EUR, AFR and HIS meta-analyses, we identified 135  
486 independent loci (**Figure 2**). A summary of each locus, including LD patterns between lead  
487 variants from each meta-analysis as well as independent signals and association test results  
488 across all meta-analyses, is available in supplemental **Table S8**.

489

#### 490 **Gene Prioritization with TWAS and Protein QTL MR**

491 Transcriptome Wide Association Study: Across the 6 single-tissue and 3 cross-tissues datasets  
492 analyzed, we identified 166 significant ( $P < 3.52 \times 10^{-6}$ ) and conditionally independent  
493 associations with a high posterior probability of colocalization ( $> 0.75$ ) between gene  
494 expression and VTE risk (see supplemental **Table S9**). These associations involved 108 genes, of  
495 which 77 were mapped to 46 genome-wide significant GWAS loci, leaving an additional 31  
496 novel candidate genes that mapped outside of genome-wide significant GWAS loci  
497 (supplemental **Table S10**). The candidate genes included (in chromosomal order): *PRDX6*,  
498 *LMOD1*, *FEZ2*, *PNKD*, *BAP1*, *PRKCD*, *CHST13*, *CHST13*, *HGFAC*, *NIPAL1*, *ARHGAP10*, *LHFPL2*,  
499 *DND1*, *THBS2*, *MEST*, *COPG2*, *SYK*, *AAMDC*, *STAC3*, *KIF5A*, *NFKBIA*, *CINP*, *COMMD4*, *DCTPP1*,  
500 *NFAT5*, *MPDU1*, *KDM6B*, *C18orf8*, *NPC1*, *RAB3D*, *ISOC2*, and *SDCBP2*. At 33 GWAS loci, an  
501 associated gene matched the gene closest to the lead variant, supporting a role as a causal  
502 gene, while associated genes at the remaining 13 GWAS loci may point to genes of interest for  
503 further investigations.

504

505 Protein QTL Mendelian Randomization: We performed agnostic MR of 1,216 plasma circulating  
506 pQTL using the combined VTE meta-analysis results and identified 23 proteins with a significant  
507 causal association ( $P < 3.98 \times 10^{-5}$ , **Figure 3**, supplemental **Table S11**). For 13 proteins, the gene  
508 coordinates matched a genome-wide significant GWAS locus and included 5 of the novel GWAS  
509 loci: *TFPI*, *ERAP2*, *TIMP3* (at the *SYN3* locus), *TIMP4* (at the *SYN2/PPARG* locus) and *ECM1* (at  
510 the *FALEC* locus). Among the 10 candidate genes mapping outside of GWAS loci, *HGFAC* and



511 *PRDX6* were also candidate genes identified in the TWAS. The remaining 8 candidate genes  
512 were: *EFEMP1, LCT, CLPS, MSR1, LGALS3, CD97, LILRB5, APOL3*.

513

#### 514 **Association of VTE-associated Variants with Hemostasis and Hematology Traits**

515 The association of any lead or conditionally independent variant at the 135 GWAS loci with  
516 hemostasis traits is presented in **Figure 4.A** and supplemental **Table S12**. Among the 92 novel  
517 (replicated and candidate) loci reported above, 18 (19%) had a variant associated with 1 or  
518 more of the 10 hemostasis traits: fibrinogen (*CPS1, SLC39A8, ARHGEF28, LNPEP, PLCE1,*  
519 *MS4A4A, SH2B3, MIR4708, MAP1A, HP*); vWF (*SLC39A8, LNPEP, ST3GAL4, SH2B3, MAP1A, HP,*  
520 *APOE, FUT2*); FVII (*XXYLT1, JAZF1-AS1, MS4A6E, RCOR1, MAP1A*); FVIII (*ST3GAL4, COPZ1, HP,*  
521 *APOE*); PAI-1 (*COPZ1, GIPR*); or PT (*APOH*).

522

523 Next, we investigated associations of the 135 GWAS loci with hematology traits, presented in  
524 **Figure 4.B** and supplemental **Table S13**. Across all 15 CBC measures and among the 92 novel  
525 loci, we observed at least 1 association at 55 (59%) novel (replicated and candidate) loci.

526

#### 527 **Phenome-wide Association Studies**

528 We performed a pheWAS of lead and conditionally independent variants at the 135 significantly  
529 associated loci across 1,500 publicly available phenotypes involving European UKB participants  
530 (supplemental **Table S14**). For each trait, only genome-wide significant variants were retrieved,  
531 and we focused on traits sharing at least 10 loci with our VTE analyses (**Figure 5**, supplemental  
532 **Table S15**), which might indicate common biological pathways. Hematology traits, in particular  
533 platelet traits, shared the most loci with VTE (e.g. 33 for platelet count), consistent with our  
534 observations from the larger CBC GWAS ( $n \sim 750,000$ ) sample (**Figure 4.B**). Several traits  
535 correspond to height and weight measurements, as well as enzymes mainly produced by the  
536 liver (e.g., albumin, sex-hormone binding globulin, or insulin growth factor-1), and plasma lipid-  
537 related traits (Apolipoprotein-A and B, HDL cholesterol, or triglycerides). Blood pressure  
538 (systolic and diastolic), glycated hemoglobin, calcium, cystatin C, and C-reactive protein levels  
539 were among additional traits sharing at least 10 loci with VTE. Few traits had a consistent

540 direction of effect with respect to VTE risk across shared loci (**Figure 5**). For example, out of 10  
541 loci shared between bilirubin levels and VTE, 9 (90%) were associated with an increase of both  
542 bilirubin levels and VTE risk. For albumin levels, glycated hemoglobin, and systolic blood  
543 pressure, an opposite direction of effect between these traits and VTE risk was observed at  
544 more than 75% of shared loci.

545

## 546 **DISCUSSION**

547 We identified 135 independent genomic loci and 39 additional genes from TWAS and pQTL  
548 associated with an increased or decreased risk of VTE. This reflects a substantial increase in the  
549 number of validated and candidate loci for VTE risk beyond past genetic mapping efforts.<sup>13,14</sup>  
550 Our results highlight genetic variation across the rare-to-common allele frequency spectrum in  
551 multiple ancestry groups and add new evidence of biologic predictors of VTE pathogenesis for  
552 further investigation. The *in silico* interrogations provide valuable clues regarding the putative  
553 causal gene at each locus and additional insights to biological pathways shared with VTE.

554

### 555 **Biological Insights**

556 Novel Replicated Loci: Our strongest evidence supports 34 loci with novel VTE associations.  
557 Except for *TFPI* and *SERPINE2*, the novel genetic loci were not in established VTE  
558 pathophysiology pathways. A subset of these loci (12 loci, 35%) was associated with plasma  
559 levels of the 10 hemostasis traits interrogated and most (26 loci, 76%) were associated with a  
560 hematology trait. This contrast should be interpreted with caution as statistical power for the  
561 hemostasis traits was much smaller than for the hematology traits.

562

563 While most of the novel associations reported had an OR in the range of [0.90-0.98; 1.03-1.10],  
564 we were able to identify and replicate 3 uncommon variants with larger effects: an intronic  
565 variant (MAF = 0.021) in the glycosyltransferase *ST3GAL4* (discovery OR = 1.21, replication OR =  
566 1.18), which was also associated with increased vWF and FVIII levels, an intronic variant (MAF =  
567 0.029) in the transcriptional co-activator *ZMIZ1* (discovery OR = 1.15, replication OR = 1.11), and  
568 an exonic variant (MAF = 0.027) in *MAP1A* (p.Pro2349Leu, discovery OR = 0.87, replication OR =

569 0.84), which was also associated with decreased levels of vWF and fibrinogen, and had a  
570 protective effect against VTE.

571

572 Variants associated with hemostasis traits provide clues that the causal gene at these loci might  
573 directly or indirectly perturb the coagulation cascade. For instance, *XXYL1* encodes a  
574 xylosyltransferase known to interact with coagulation factors<sup>58</sup> and had a nearby variant (OR  
575 discovery = 1.06, OR replication = 1.06) also associated with decreased FVII levels. Another  
576 example is *FUT2*, a fucosyltransferase gene involved in the synthesis of the H antigen, a building  
577 block for the production of antigens within the ABO blood group. *FUT2* had a downstream  
578 variant (OR discovery= 0.96, OR replication = 0.96) that was also associated with decreased vWF  
579 levels, mirroring results observed with vWF at the *ABO* locus. In addition, some variants were  
580 associated with several hematology traits, suggesting common genetic regulatory pathways  
581 affecting hematopoiesis, such as the replicated *RCOR1* signal on chromosome 14, and the  
582 candidate gene *REST* on chromosome 4 identified in the combined meta-analysis, 2 genes that  
583 form the transcriptional repressor CoREST, known to mediate hematopoiesis.<sup>59</sup>

584

585 Among the 34 loci, 17 had TWAS evidence linking transcript expression with a gene in the locus  
586 and 3 were linked to protein measures. These results may help to prioritize biologically relevant  
587 genes for further investigations. Notably, at the *COPZ1* locus, the lead variant was associated  
588 with several CBC measures, including platelet count and red blood cell count, and the TWAS  
589 revealed an association with *NFE2*, known to regulate erythroid and megakaryocyte  
590 maturation.

591

592 Other Replicated and Non-Replicated Loci: Replicated variants included 2 rare variants at the  
593 known *EPHA3* (intergenic, MAF = 0.0024, OR = 2.40) and *FADS2B* (intronic, MAF = 0.0047, OR =  
594 0.64) loci. Among variants that failed replication, only 1 rare variant displayed significant  
595 heterogeneity ( $P = 0.0001$ , *MYO16* locus), and 3 variants were located in known loci: *STAB2* was  
596 previously identified as associated with VTE in an independent gene-based study using exome  
597 sequencing,<sup>60</sup> *ARL13B* (near *PROS1*) was identified in the previous VTE GWAS from MVP,<sup>14</sup> and

598 the *JAK2* V617F variant, which is known to increase the risk of myeloproliferative neoplasm,  
599 was recently identified as associated with VTE in an exome study of nearly 450,000 UKB  
600 participants.<sup>61</sup> According to gnomAD,<sup>57</sup> the *ARL13B* variant identified is mostly observed in AFR-  
601 ancestry individuals (rs79324379, AFR MAF = 0.026 against MAF < 0.0003 in other ancestries)  
602 and was not in LD with the lead variant identified in the previous MVP GWAS (rs6795524, LD  $r^2$   
603 = 0.01 in AFR); nonetheless, we would need additional information to validate this locus as a  
604 truly independent signal—and not just a marker—from any strong, uncharacterized signal in  
605 *PROS1*. Similarly, the *STAB2* variant identified is mostly observed in Finns (rs142351376, Finns  
606 MAF = 0.020 against MAF < 0.0003 in other ancestries); the lack of Finns in the replication likely  
607 impaired our ability to replicate the association. Out of the other 12 failed replications, 5  
608 involved rare variants (MAF < 0.01) that did not reach nominal significance ( $P < 0.05$ ), while 6 of  
609 the remaining 7 common variants reached nominal significance, suggesting that these common  
610 variants might need a larger replication sample to be validated. One of these signals, located  
611 between *SYN2* and *PPARG*, was associated with the protein levels of *TIMP4* in a previous  
612 study.<sup>62</sup> This protein, known to inhibit matrix metalloproteinases and involved in platelet  
613 aggregation and recruitment,<sup>63</sup> was confirmed by the pQTL MR analysis as a gene associated  
614 with VTE risk.

615  
616 Novel Candidate Loci: Across the multiple interrogation approaches, we identified several score  
617 of candidate loci with evidence to support their association with VTE, though not yet replicated.  
618 This included 35 candidates from the combined GWAS, 7 candidates from the EUR-ancestry  
619 GWAS, and 2 candidates from the AFR-ancestry GWAS. Interestingly, the 2 variants (MAF 0.04  
620 and 0.011) in the AFR-ancestry population were not present in EUR-ancestry participants and  
621 were associated with nearly 2-fold changes in risk of VTE. However, these 2 variants were only  
622 detected in a subset of studies, which included only 882 AFR-ancestry VTE cases out of 7,482,  
623 warranting additional investigations to confirm these 2 signals in *RBFOX1* (an RNA-binding  
624 protein) and *COL6A2* (a collagen-generating gene that contains several domains similar to *VWF*  
625 type A domains). For the remaining candidate GWAS loci, we saw similar attributes and

626 associations as we did with the replicated loci. With additional replication resources in the  
627 future, these candidates may become fully replicated genetic associations.

628 In addition, the conditional analyses revealed independently associated variants mapping to  
629 distinct genes that may be of interest for further investigations, such as *BRD3* at the *ABO* locus,  
630 a chromatin reader known to associate with the hematopoietic transcription factor *GATA1*.<sup>64</sup> At  
631 the *EPHA3* locus, we also noted that the lead GWAS variant and the conditionally independent  
632 variant mapped upstream and downstream of *PROS2P*, a protein S pseudogene that might be  
633 of interest.

634

635 At these candidate loci, gene prioritized by the TWAS may also provide putative genes at these  
636 loci. For example *ZBTB7B*, a zinc-finger protein that represses the expression of extracellular  
637 matrix genes such as fibronectin and collagen<sup>65</sup> was identified by TWAS at the candidate locus  
638 *DCST2*. The 31 candidate genes identified in the TWAS as well as the additional 8 from the pQTL  
639 MR analyses, although lacking a significant genetic association at these loci, might indicate  
640 relevant genes for future investigations. For instance, *SYK* is a critical platelet-activation protein  
641 and tyrosine kinase inhibitors of *SYK* have been explored for platelet inhibition.<sup>66,67</sup>

642

### 643 **Clinical Implications**

644 Current anticoagulation therapy to prevent or treat VTE operate through the modulation of  
645 proteins produced in the liver (coumarin-based therapies) or through direct inhibition of  
646 coagulation factors IIa (thrombin) and Xa. Although the safety profile of anticoagulation  
647 treatments has evolved, bleeding remains a life-threatening off-target outcome. New  
648 approaches to preventing thrombosis while minimizing bleeds are in development, including a  
649 focus on contact (intrinsic) pathway proteins factor XI, factor XII, prekallikrein, and high-  
650 molecular-weight kininogen.<sup>68</sup> Agnostic interrogations such as these may lead to discovery of  
651 novel proteins that “break the inexorable link between antithrombotic therapy and bleeding  
652 risk.”<sup>69</sup>

653

654 Remarkably, the hematology traits investigations and the pheWAS established that CBC  
655 measures share a large number of loci with VTE, and platelet phenotypes in particular are the  
656 most frequent traits shared with VTE variants: 51 loci were associated with either platelet  
657 count, mean platelet volume, plateletcrit or platelet distribution width in the pheWAS, and 35  
658 of these loci are novel, which represents more than a third of all novel genetic associations.  
659 Several loci associated with VTE harbor genes with known roles in hematopoiesis and  
660 megakaryocyte development, or platelet turnover: *ARID1A*, *REST* and its co-repressor *RCOR1*,  
661 *CDK6*, *MECOM*, *RBPM5*, *ANGPT1*, *RET*, *NFE2*, *ST3GAL4*, *SH2B3*, *ZFPM2* and *ZFPM1*,<sup>59,71–79</sup> or  
662 platelet aggregation: *SLC44A2*, *VWF*, *FGG*, *GP6*, *RGS18*, *GRK5*, *PIK3CB*, *PLCE1*, *PLCG2*, *IRAG1*,  
663 *TIMP4*, *FCER1G*, and *ALOX12*.<sup>10,63,80–89</sup> Altered platelet generation, turnover or reactivity may  
664 be a feature of VTE pathogenesis. For one, past prospective studies<sup>90</sup> and case-control  
665 studies<sup>91,92</sup> suggest that enlarged platelets, as measured by MPV, are associated with VTE and  
666 VTE outcomes. Studies of platelet function measures with VTE have been less conclusive which  
667 may relate to the limitations of these studies in assessing comprehensive and standardized  
668 platelet reactivity mechanisms.<sup>93–95</sup> Collectively, these results suggest that treatments inhibiting  
669 platelet activation such as aspirin might be beneficial in the prevention of VTE, although  
670 previous studies and trials on aspirin and combinations with anticoagulants offered mixed  
671 results.<sup>96</sup> Different antiplatelets, such as more targeted thrombin, PAR1 or PAR4 inhibitors, or  
672 intracellular PDE platelet signaling inhibitors like cilostazol, could be worthwhile for further  
673 study in VTE prevention.

674

### 675 **Strengths and Limitations**

676 The major strength of this genetic discovery effort is the large sample size of the genetic  
677 variation interrogations. As the largest genetic association study of VTE to date, we were able  
678 to increase statistical power compared with previous VTE GWAS meta-analysis efforts and  
679 increase our ability to detect new associations, many of which were replicated. We were also  
680 better powered to detect less common genetic variation. The cross-ancestry meta-analyses also  
681 increased our potential to discover novel genetic associations where the allele frequency was  
682 more common in some populations compared with others.

683  
684 Several limitations deserve mention. Case ascertainment varied by study and some studies  
685 provided validated VTE events while others relied on information from electronic health  
686 records. Further, some studies only included hospitalized VTE events and did not capture  
687 events in the outpatient setting. These differences may have introduced some bias if case  
688 ascertainment and hospitalization status have genetic determinants. We included all VTE cases  
689 and did not stratify by provoked status in order to increase statistical power. Furthermore,  
690 many of the studies had not classified the VTE events as provoked and unprovoked. In addition,  
691 although the cross-ancestry approach provided benefits as described above, the numbers of  
692 VTE cases were not evenly distributed by ancestry, thus reducing our ability to detect ancestry-  
693 specific VTE variants in the under-represented ancestry groups with more modest case counts.  
694 Due to the diversity of imputation panels used by the participating studies, genetic variants had  
695 variable coverage across studies which weakened our power to detect associations. Another  
696 limitation of our approach that used summary GWAS statistics from meta-analyses is the  
697 absence of participant-specific genotype-level information. This required us to rely on LD  
698 information extracted from external datasets, which can result in variants being missed and LD  
699 patterns not accurately captured. This may have introduced some bias in analyses that relied on  
700 LD, such as the conditional analyses and the TWAS. Further, *in silico* work was performed using  
701 external data sets such as the hemostatic factors and hematology traits summary statistics,  
702 where the size (and statistical power) of the datasets varied greatly. Although different  
703 significance thresholds were employed for significance, this may have biased the detection of  
704 significant associations to those traits that had large sample sizes.

705

## 706 **Conclusions**

707 These cross-ancestry GWAS meta-analyses have provided a list of 34 loci that replicated  
708 discovery findings. Some of the novel loci may contribute to VTE through well-characterized  
709 coagulation pathways while others provide new data on the role of hematology traits,  
710 particularly platelet function. Many of the replicated loci are outside of known or currently  
711 hypothesized pathways to thrombosis. We also provided a list of 44 new candidate loci

712 including candidates from the combined cross-ancestry GWAS, from the EUR-ancestry GWAS,  
713 from the AFR-ancestry GWAS, and also 39 candidate genes from the TWAS and pQTL MR. These  
714 findings highlight new pathways to thrombosis and provide novel molecules that may be useful  
715 in the development of antithrombosis treatment that reduce bleeding adverse occurrences.



716 **Acknowledgments**

717 The INVENT Consortium would like to acknowledge all the participants across studies that  
718 provided their health information to support these analyses.

719

720 The INVENT Consortium is supported in part by HL134894 and HL154385. The Analysis  
721 Commons was funded by R01HL131136. Infrastructure for the CHARGE Consortium is  
722 supported in part by the National Heart, Lung, and Blood Institute grant R01HL105756.

723

724 Study acknowledges can be found in the **Supplemental Methods**.

725

726 The views expressed in this manuscript are those of the authors and do not necessarily  
727 represent the views of the National Heart, Lung and Blood Institute, the National Institute of  
728 Health, Department of Veterans Affairs, or the U.S. Department of Health and Human Services.

729

730

731

732

733

734 **References**

735

736 1. Silverstein, M. D. *et al.* Trends in the incidence of deep vein thrombosis and pulmonary

737 embolism: a 25-year population-based study. *Arch Intern Med* **158**, 585–593 (1998).

738 2. Ghanima, W. *et al.* Incidence and prevalence of venous thromboembolism in Norway 2010–

739 2017. *Thromb Res* **195**, 165–168 (2020).

740 3. Delluc, A. *et al.* Current incidence of venous thromboembolism and comparison with 1998:

741 a community-based study in Western France. *Thromb Haemost* **116**, 967–974 (2016).

742 4. Smith, N. L. *et al.* Association of genetic variations with nonfatal venous thrombosis in

743 postmenopausal women. *JAMA* **297**, 489–498 (2007).

744 5. Bezemer, I. D. *et al.* Gene variants associated with deep vein thrombosis. *JAMA* **299**, 1306–

745 1314 (2008).

746 6. Heit, J. A. *et al.* A genome-wide association study of venous thromboembolism identifies

747 risk variants in chromosomes 1q24.2 and 9q. *J. Thromb. Haemost.* **10**, 1521–1531 (2012).

748 7. Buil, A. *et al.* C4BPB/C4BPA is a new susceptibility locus for venous thrombosis with

749 unknown protein S-independent mechanism: results from genome-wide association and

750 gene expression analyses followed by case-control studies. *Blood* **115**, 4644–4650 (2010).

751 8. Tang, W. *et al.* A genome-wide association study for venous thromboembolism: the

752 extended cohorts for heart and aging research in genomic epidemiology (CHARGE)

753 consortium. *Genet Epidemiol* **37**, 512–521 (2013).

754 9. Germain, M. *et al.* Meta-analysis of 65,734 individuals identifies TSPAN15 and SLC44A2 as

755 two susceptibility loci for venous thromboembolism. *Am. J. Hum. Genet.* **96**, 532–542

756 (2015).

- 757 10. Bennett, J. A. *et al.* The choline transporter Slc44a2 controls platelet activation and  
758 thrombosis by regulating mitochondrial function. *Nat Commun* **11**, 3479 (2020).
- 759 11. Constantinescu-Bercu, A. *et al.* Activated  $\alpha$ IIb $\beta$ 3 on platelets mediates flow-dependent  
760 NETosis via SLC44A2. *Elife* **9**, e53353 (2020).
- 761 12. Zirka, G. *et al.* Impaired adhesion of neutrophils expressing Slc44a2/HNA-3b to VWF  
762 protects against NETosis under venous shear rates. *Blood* **137**, 2256–2266 (2021).
- 763 13. Lindström, S. *et al.* Genomic and transcriptomic association studies identify 16 novel  
764 susceptibility loci for venous thromboembolism. *Blood* **134**, 1645–1657 (2019).
- 765 14. Klarin, D. *et al.* Genome-wide association analysis of venous thromboembolism identifies  
766 new risk loci and genetic overlap with arterial vascular disease. *Nat Genet* **51**, 1574–1579  
767 (2019).
- 768 15. Klarin, D., Emdin, C. A., Natarajan, P., Conrad, M. F. & Kathiresan, S. Genetic Analysis of  
769 Venous Thromboembolism in UK Biobank Identifies the ZFPM2 Locus and Implicates  
770 Obesity as a Causal Risk Factor. *Circ Cardiovasc Genet* **10**, (2017).
- 771 16. Sudlow, C. *et al.* UK Biobank: An Open Access Resource for Identifying the Causes of a Wide  
772 Range of Complex Diseases of Middle and Old Age. *PLOS Medicine* **12**, e1001779 (2015).
- 773 17. Mitt, M. *et al.* Improved imputation accuracy of rare and low-frequency variants using  
774 population-specific high-coverage WGS-based imputation reference panel. *Eur J Hum Genet*  
775 **25**, 869–876 (2017).
- 776 18. Nagai, A. *et al.* Overview of the BioBank Japan Project: Study design and profile. *J Epidemiol*  
777 **27**, S2–S8 (2017).

- 778 19. Smoller, J. W. *et al.* An eMERGE Clinical Center at Partners Personalized Medicine. *J Pers*  
779 *Med* **6**, E5 (2016).
- 780 20. Antoni, G. *et al.* A multi-stage multi-design strategy provides strong evidence that the BAI3  
781 locus is associated with early-onset venous thromboembolism. *J Thromb Haemost* **8**, 2671–  
782 2679 (2010).
- 783 21. Ibrahim-Kosta, M. *et al.* Minor allele of the factor V K858R variant protects from venous  
784 thrombosis only in non-carriers of factor V Leiden mutation. *Sci Rep* **9**, 3750 (2019).
- 785 22. Vázquez-Santiago, M. *et al.* Short closure time values in PFA-100® are related to venous  
786 thrombotic risk. Results from the RETROVE Study. *Thromb Res* **169**, 57–63 (2018).
- 787 23. Bild, D. E. *et al.* Multi-Ethnic Study of Atherosclerosis: objectives and design. *Am J Epidemiol*  
788 **156**, 871–881 (2002).
- 789 24. Souto, J. C. *et al.* Genetic determinants of hemostasis phenotypes in Spanish families.  
790 *Circulation* **101**, 1546–1551 (2000).
- 791 25. Souto, J. C. *et al.* Genetic susceptibility to thrombosis and its relationship to physiological  
792 risk factors: the GAIT study. Genetic Analysis of Idiopathic Thrombophilia. *Am J Hum Genet*  
793 **67**, 1452–1459 (2000).
- 794 26. Hinds, D. A. *et al.* Genome-wide association analysis of self-reported events in 6135  
795 individuals and 252 827 controls identifies 8 loci associated with thrombosis. *Hum Mol*  
796 *Genet* **25**, 1867–1874 (2016).
- 797 27. Zhou, W. *et al.* *Global Biobank Meta-analysis Initiative: powering genetic discovery across*  
798 *human diseases*. 2021.11.19.21266436

- 799 <https://www.medrxiv.org/content/10.1101/2021.11.19.21266436v1> (2021)
- 800 doi:10.1101/2021.11.19.21266436.
- 801 28. Winkler, T. W. *et al.* Quality control and conduct of genome-wide association meta-
- 802 analyses. *Nat Protoc* **9**, 1192–1212 (2014).
- 803 29. Willer, C. J., Li, Y. & Abecasis, G. R. METAL: fast and efficient meta-analysis of genomewide
- 804 association scans. *Bioinformatics* **26**, 2190–2191 (2010).
- 805 30. Wolfe, D., Dudek, S., Ritchie, M. D. & Pendergrass, S. A. Visualizing genomic information
- 806 across chromosomes with PhenoGram. *BioData Min* **6**, 18 (2013).
- 807 31. Devlin, B. & Roeder, K. Genomic control for association studies. *Biometrics* **55**, 997–1004
- 808 (1999).
- 809 32. Bulik-Sullivan, B. K. *et al.* LD Score regression distinguishes confounding from polygenicity in
- 810 genome-wide association studies. *Nat Genet* **47**, 291–295 (2015).
- 811 33. Yang, J. *et al.* Conditional and joint multiple-SNP analysis of GWAS summary statistics
- 812 identifies additional variants influencing complex traits. *Nat Genet* **44**, 369–375, S1-3
- 813 (2012).
- 814 34. Kowalski, M. H. *et al.* Use of >100,000 NHLBI Trans-Omics for Precision Medicine (TOPMed)
- 815 Consortium whole genome sequences improves imputation quality and detection of rare
- 816 variant associations in admixed African and Hispanic/Latino populations. *PLoS Genet* **15**,
- 817 e1008500 (2019).
- 818 35. Sabik, O. L. & Farber, C. R. *RACER: A data visualization strategy for exploring multiple*
- 819 *genetic associations*. 495366 <https://www.biorxiv.org/content/10.1101/495366v3> (2018)
- 820 doi:10.1101/495366.

- 821 36. Myers, T. A., Chanock, S. J. & Machiela, M. J. LDlinkR: An R Package for Rapidly Calculating  
822 Linkage Disequilibrium Statistics in Diverse Populations. *Front Genet* **11**, 157 (2020).
- 823 37. Gusev, A. *et al.* Integrative approaches for large-scale transcriptome-wide association  
824 studies. *Nat Genet* **48**, 245–252 (2016).
- 825 38. The 1000 Genomes Project Consortium. A global reference for human genetic variation.  
826 *Nature* **526**, 68–74 (2015).
- 827 39. GTEx Consortium. Human genomics. The Genotype-Tissue Expression (GTEx) pilot analysis:  
828 multitissue gene regulation in humans. *Science* **348**, 648–660 (2015).
- 829 40. Nuotio, J. *et al.* Cardiovascular risk factors in 2011 and secular trends since 2007: the  
830 Cardiovascular Risk in Young Finns Study. *Scand J Public Health* **42**, 563–571 (2014).
- 831 41. Wright, F. A. *et al.* Heritability and genomics of gene expression in peripheral blood. *Nat*  
832 *Genet* **46**, 430–437 (2014).
- 833 42. Feng, H. *et al.* Leveraging expression from multiple tissues using sparse canonical  
834 correlation analysis and aggregate tests improves the power of transcriptome-wide  
835 association studies. *PLOS Genetics* **17**, e1008973 (2021).
- 836 43. Giambartolomei, C. *et al.* Bayesian Test for Colocalisation between Pairs of Genetic  
837 Association Studies Using Summary Statistics. *PLOS Genetics* **10**, e1004383 (2014).
- 838 44. Zhao, H. *et al.* Proteome-wide Mendelian randomization in global biobank meta-analysis  
839 reveals multi-ancestry drug targets for common diseases. 2022.01.09.21268473 (2022)  
840 doi:10.1101/2022.01.09.21268473.
- 841 45. de Vries, P. S. *et al.* A meta-analysis of 120 246 individuals identifies 18 new loci for  
842 fibrinogen concentration. *Hum. Mol. Genet.* **25**, 358–370 (2016).

- 843 46. Smith, N. L. *et al.* Genetic predictors of fibrin D-dimer levels in healthy adults. *Circulation*  
844 **123**, 1864–1872 (2011).
- 845 47. de Vries, P. S. *et al.* A genome-wide association study identifies new loci for factor VII and  
846 implicates factor VII in ischemic stroke etiology. *Blood* **133**, 967–977 (2019).
- 847 48. Sabater-Lleal, M. *et al.* Genome-Wide Association Transethnic Meta-Analyses Identifies  
848 Novel Associations Regulating Coagulation Factor VIII and von Willebrand Factor Plasma  
849 Levels. *Circulation* **139**, 620–635 (2019).
- 850 49. Sennblad, B. *et al.* Genome-wide association study with additional genetic and post-  
851 transcriptional analyses reveals novel regulators of plasma factor XI levels. *Hum. Mol.*  
852 *Genet.* **26**, 637–649 (2017).
- 853 50. Huang, J. *et al.* Genome-wide association study for circulating tissue plasminogen activator  
854 levels and functional follow-up implicates endothelial STXBP5 and STX2. *Arterioscler.*  
855 *Thromb. Vasc. Biol.* **34**, 1093–1101 (2014).
- 856 51. Huang, J. *et al.* Genome-wide association study for circulating levels of PAI-1 provides novel  
857 insights into its regulation. *Blood* **120**, 4873–4881 (2012).
- 858 52. Tang, W. *et al.* Genetic associations for activated partial thromboplastin time and  
859 prothrombin time, their gene expression profiles, and risk of coronary artery disease. *Am J*  
860 *Hum Genet* **91**, 152–162 (2012).
- 861 53. Chen, M.-H. *et al.* Trans-ethnic and Ancestry-Specific Blood-Cell Genetics in 746,667  
862 Individuals from 5 Global Populations. *Cell* **182**, 1198-1213.e14 (2020).

- 863 54. Elsworth, B. *et al.* *The MRC IEU OpenGWAS data infrastructure*. 2020.08.10.244293  
864 <https://www.biorxiv.org/content/10.1101/2020.08.10.244293v1> (2020)  
865 doi:10.1101/2020.08.10.244293.
- 866 55. Yang, J. *et al.* Genomic inflation factors under polygenic inheritance. *European Journal of*  
867 *Human Genetics* **19**, 807 (2011).
- 868 56. Riis, J., Nordestgaard, B. G. & Afzal, S.  $\alpha$ 1 -Antitrypsin Z allele and risk of venous  
869 thromboembolism in the general population. *J Thromb Haemost* **20**, 115–125 (2022).
- 870 57. Karczewski, K. J. *et al.* The mutational constraint spectrum quantified from variation in  
871 141,456 humans. *Nature* **581**, 434–443 (2020).
- 872 58. Minamida, S. *et al.* Detection of UDP-D-xylose: alpha-D-xyloside alpha 1--  
873 >3xylosyltransferase activity in human hepatoma cell line HepG2. *J Biochem* **120**, 1002–  
874 1006 (1996).
- 875 59. Saleque, S., Kim, J., Rooke, H. M. & Orkin, S. H. Epigenetic regulation of hematopoietic  
876 differentiation by Gfi-1 and Gfi-1b is mediated by the cofactors CoREST and LSD1. *Mol Cell*  
877 **27**, 562–572 (2007).
- 878 60. Desch, K. C. *et al.* Whole-exome sequencing identifies rare variants in STAB2 associated  
879 with venous thromboembolic disease. *Blood* **136**, 533–541 (2020).
- 880 61. Backman, J. D. *et al.* Exome sequencing and analysis of 454,787 UK Biobank participants.  
881 *Nature* **599**, 628–634 (2021).
- 882 62. Sun, B. B. *et al.* Genomic atlas of the human plasma proteome. *Nature* **558**, 73–79 (2018).
- 883 63. Radomski, A. *et al.* Identification, regulation and role of tissue inhibitor of  
884 metalloproteinases-4 (TIMP-4) in human platelets. *Br J Pharmacol* **137**, 1330–1338 (2002).



- 885 64. Lamonica, J. M. *et al.* Bromodomain protein Brd3 associates with acetylated GATA1 to  
886 promote its chromatin occupancy at erythroid target genes. *Proc Natl Acad Sci U S A* **108**,  
887 E159-168 (2011).
- 888 65. Widom, R. L., Lee, J. Y., Joseph, C., Gordon-Froome, I. & Korn, J. H. The hcKrox gene family  
889 regulates multiple extracellular matrix genes. *Matrix Biol* **20**, 451–462 (2001).
- 890 66. Perrella, G. *et al.* Role of Tyrosine Kinase Syk in Thrombus Stabilisation at High Shear. *Int J*  
891 *Mol Sci* **23**, 493 (2022).
- 892 67. Zheng, T. J. *et al.* Assessment of the effects of Syk and BTK inhibitors on GPVI-mediated  
893 platelet signaling and function. *Am J Physiol Cell Physiol* **320**, C902–C915 (2021).
- 894 68. Fredenburgh, J. C. & Weitz, J. I. New anticoagulants: Moving beyond the direct oral  
895 anticoagulants. *J Thromb Haemost* **19**, 20–29 (2021).
- 896 69. Mackman, N., Bergmeier, W., Stouffer, G. A. & Weitz, J. I. Therapeutic strategies for  
897 thrombosis: new targets and approaches. *Nat Rev Drug Discov* **19**, 333–352 (2020).
- 898 70. Hoffman, M. Coagulation in Liver Disease. *Semin Thromb Hemost* **41**, 447–454 (2015).
- 899 71. Han, L. *et al.* Chromatin remodeling mediated by ARID1A is indispensable for normal  
900 hematopoiesis in mice. *Leukemia* **33**, 2291–2305 (2019).
- 901 72. Scheicher, R. *et al.* CDK6 as a key regulator of hematopoietic and leukemic stem cell  
902 activation. *Blood* **125**, 90–101 (2015).
- 903 73. Schulze, H. & Shivdasani, R. A. Mechanisms of thrombopoiesis. *J Thromb Haemost* **3**, 1717–  
904 1724 (2005).

- 905 74. Maslah, N., Cassinat, B., Verger, E., Kiladjian, J.-J. & Velazquez, L. The role of LNK/SH2B3  
906 genetic alterations in myeloproliferative neoplasms and other hematological disorders.  
907 *Leukemia* **31**, 1661–1670 (2017).
- 908 75. Mancini, E. *et al.* FOG-1 and GATA-1 act sequentially to specify definitive megakaryocytic  
909 and erythroid progenitors. *EMBO J* **31**, 351–365 (2012).
- 910 76. Kros, J. *et al.* A mutant allele of the Swi/Snf member BAF250a determines the pool size of  
911 fetal liver hemopoietic stem cell populations. *Blood* **116**, 1678–1684 (2010).
- 912 77. Ayoub, E. *et al.* EVI1 overexpression reprograms hematopoiesis via upregulation of Spi1  
913 transcription. *Nat Commun* **9**, 4239 (2018).
- 914 78. Fonseca-Pereira, D. *et al.* The neurotrophic factor receptor RET drives haematopoietic stem  
915 cell survival and function. *Nature* **514**, 98–101 (2014).
- 916 79. Gregory, G. D. *et al.* FOG1 requires NuRD to promote hematopoiesis and maintain lineage  
917 fidelity within the megakaryocytic-erythroid compartment. *Blood* **115**, 2156–2166 (2010).
- 918 80. Keramati, A. R. *et al.* Genome sequencing unveils a regulatory landscape of platelet  
919 reactivity. *Nat Commun* **12**, 3626 (2021).
- 920 81. Mitsui, T. *et al.* ALOX12 mutation in a family with dominantly inherited bleeding diathesis. *J*  
921 *Hum Genet* **66**, 753–759 (2021).
- 922 82. Fukami, K. Structure, regulation, and function of phospholipase C isozymes. *J Biochem* **131**,  
923 293–299 (2002).
- 924 83. Johnson, A. D. *et al.* Genome-wide meta-analyses identifies seven loci associated with  
925 platelet aggregation in response to agonists. *Nat Genet* **42**, 608–613 (2010).

- 926 84. Moore, S. F., Smith, N. R., Blair, T. A., Durrant, T. N. & Hers, I. Critical roles for the  
927 phosphatidylinositide 3-kinase isoforms p110 $\beta$  and p110 $\gamma$  in thrombopoietin-mediated  
928 priming of platelet function. *Sci Rep* **9**, 1468 (2019).
- 929 85. Kuijpers, M. J. E. *et al.* Platelet CD40L Modulates Thrombus Growth Via Phosphatidylinositol  
930 3-Kinase  $\beta$ , and Not Via CD40 and I $\kappa$ B Kinase  $\alpha$ . *Arterioscler Thromb Vasc Biol* **35**, 1374–  
931 1381 (2015).
- 932 86. Rodriguez, B. A. T. *et al.* A Platelet Function Modulator of Thrombin Activation Is Causally  
933 Linked to Cardiovascular Disease and Affects PAR4 Receptor Signaling. *Am J Hum Genet*  
934 **107**, 211–221 (2020).
- 935 87. Antl, M. *et al.* IRAG mediates NO/cGMP-dependent inhibition of platelet aggregation and  
936 thrombus formation. *Blood* **109**, 552–559 (2007).
- 937 88. Schinner, E., Salb, K. & Schlossmann, J. Signaling via IRAG is essential for NO/cGMP-  
938 dependent inhibition of platelet activation. *Platelets* **22**, 217–227 (2011).
- 939 89. van Geffen, J. P. *et al.* High-throughput elucidation of thrombus formation reveals sources  
940 of platelet function variability. *Haematologica* **104**, 1256–1267 (2019).
- 941 90. Braekkan, S. K. *et al.* Mean platelet volume is a risk factor for venous thromboembolism:  
942 the Tromsø Study, Tromsø, Norway. *J Thromb Haemost* **8**, 157–162 (2010).
- 943 91. Ghaffari, S. *et al.* Prognostic value of platelet indices in patients with acute pulmonary  
944 thromboembolism. *J Cardiovasc Thorac Res* **12**, 56–62 (2020).
- 945 92. Farah, R., Nseir, W., Kagansky, D. & Khamisy-Farah, R. The role of neutrophil-lymphocyte  
946 ratio, and mean platelet volume in detecting patients with acute venous thromboembolism.  
947 *J Clin Lab Anal* **34**, e23010 (2020).

- 948 93. Puurunen, M. K., Hwang, S.-J., O'Donnell, C. J., Tofler, G. & Johnson, A. D. Platelet function  
949 as a risk factor for venous thromboembolism in the Framingham Heart Study. *Thromb Res*  
950 **151**, 57–62 (2017).
- 951 94. Sokol, J., Skerenova, M., Ivankova, J., Simurda, T. & Stasko, J. Association of Genetic  
952 Variability in Selected Genes in Patients With Deep Vein Thrombosis and Platelet  
953 Hyperaggregability. *Clin Appl Thromb Hemost* **24**, 1027–1032 (2018).
- 954 95. Panova-Noeva, M. *et al.* Comprehensive platelet phenotyping supports the role of platelets  
955 in the pathogenesis of acute venous thromboembolism - results from clinical observation  
956 studies. *EBioMedicine* **60**, 102978 (2020).
- 957 96. Diep, R. & Garcia, D. Does aspirin prevent venous thromboembolism? *Hematology Am Soc*  
958 *Hematol Educ Program* **2020**, 634–641 (2020).
- 959  
960  
961  
962  
963  
964  
965  
966  
967  
968  
969  
970  
971  
972  
973

974 **Figures and legends**

975

976

977 **Figure 1: Analyses Workflow**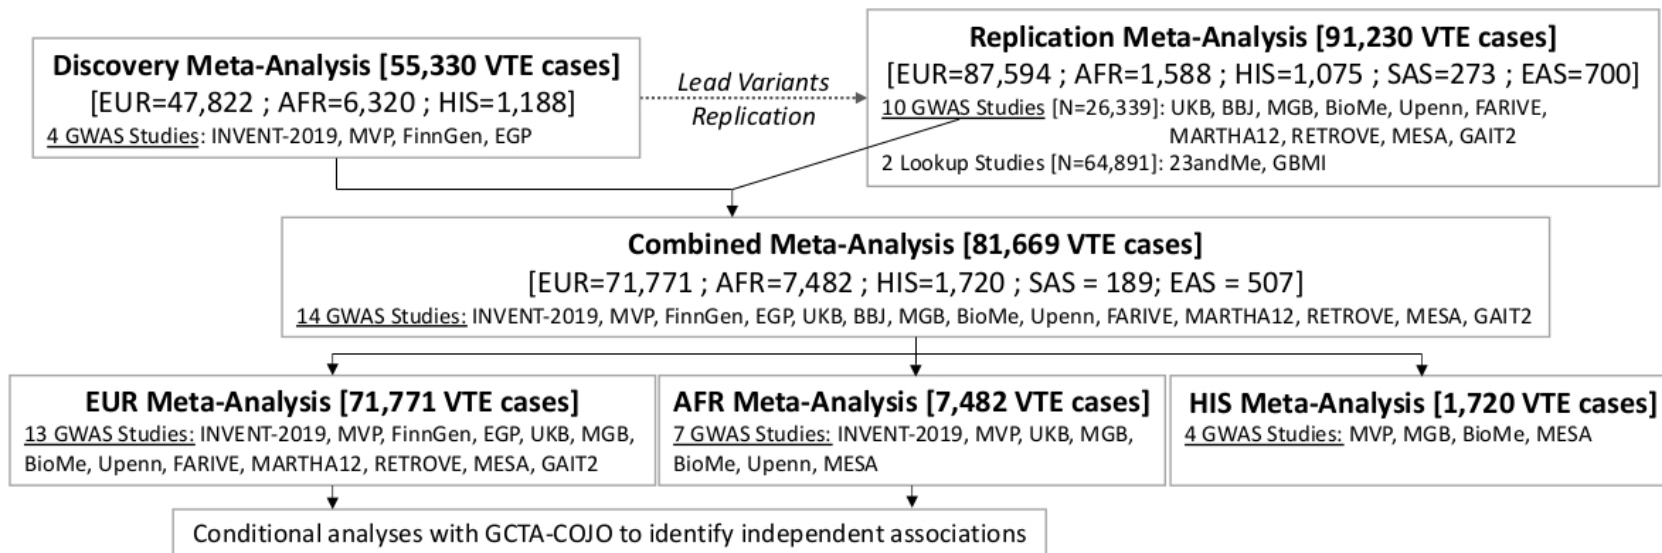

978

979 Workflow of genetic analyses conducted for this study.

980

981

982

983

984

985

986

987 Figure 2: Genetic loci associated with VTE

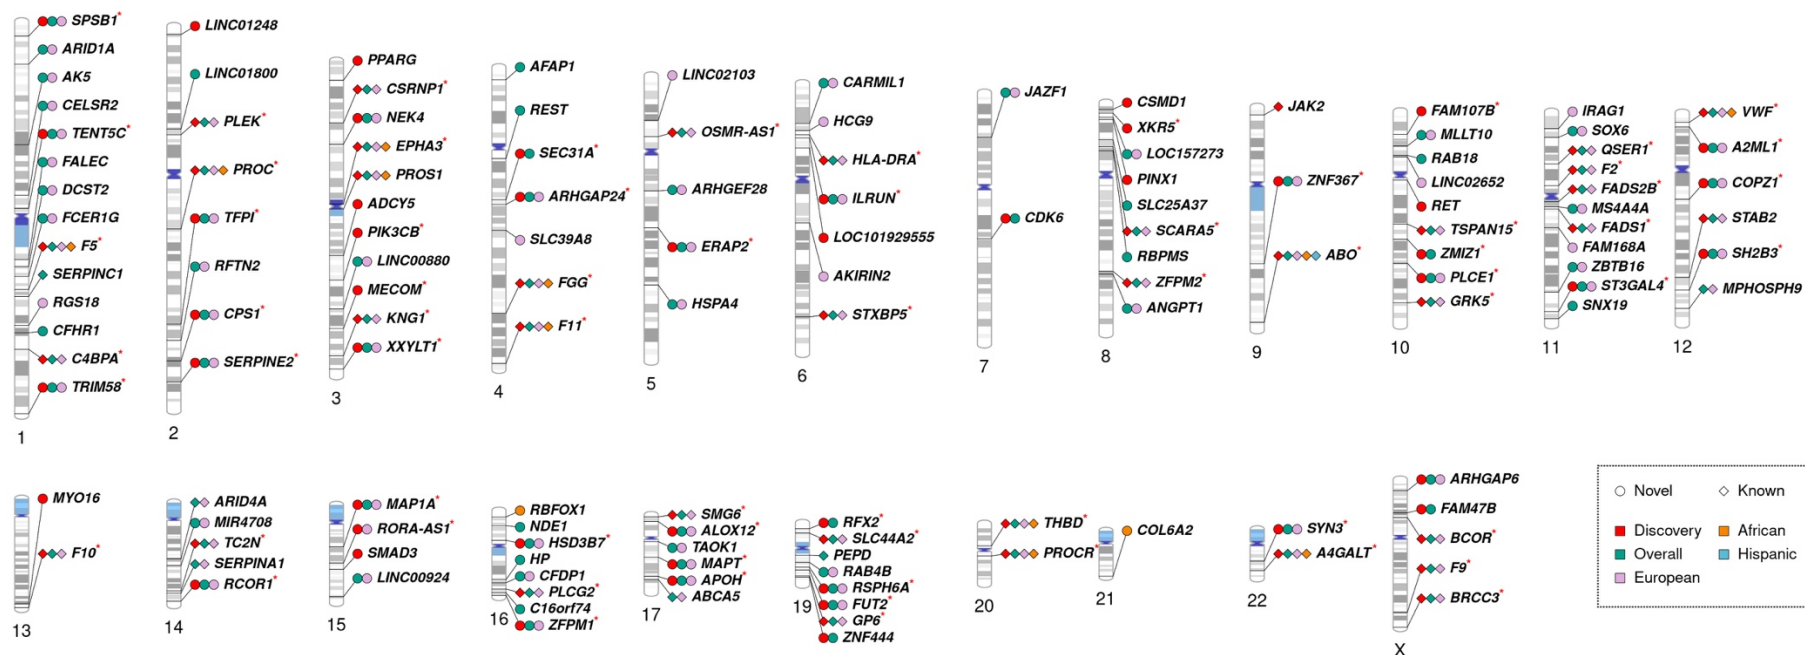

988

989 This figure presents the 130 loci significantly associated with VTE identified across all 4 meta-analyses: the Discovery (in blue), the  
 990 overall meta-analysis (in green), the analysis restricted to individuals of European ancestry (in red) and the analysis restricted to  
 991 individuals of African ancestry (in black). Novel loci are represented with circles and known loci with diamonds.

992

993

994

995

996

997 Figure 3: Significant associations of protein QTL Mendelian Randomization

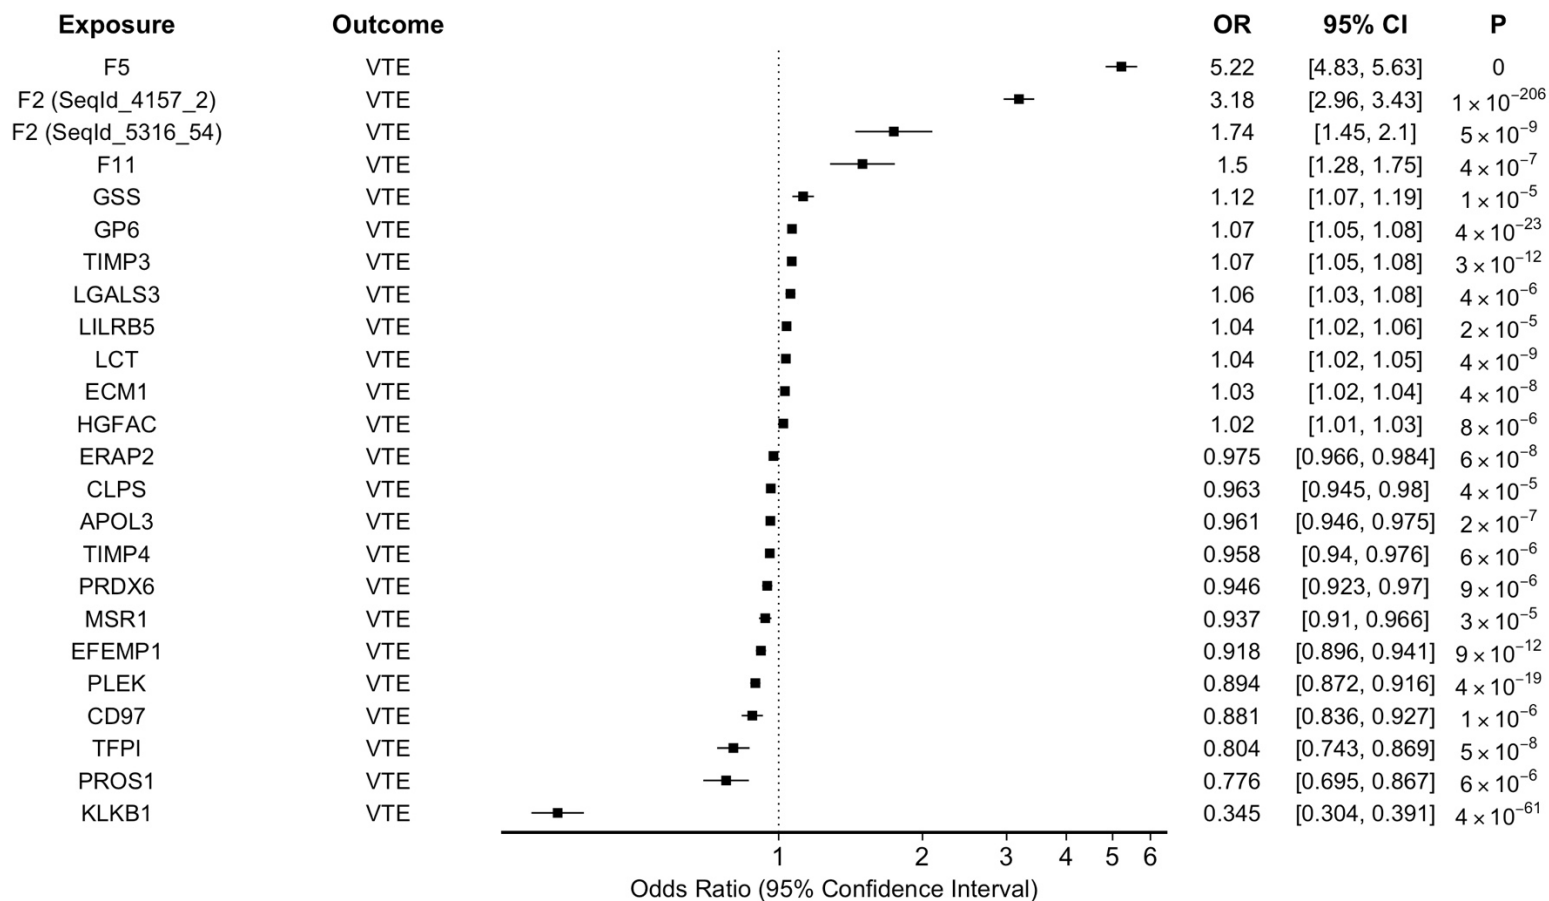

998

999 23 genes with significant causal associations with VTE, out of 1,216 plasma protein analyzed, using the combined VTE summary  
 1000 statistics.

1001

1002

1003 Figure 4: VTE genetic loci shared with hemostatic factors and blood traits

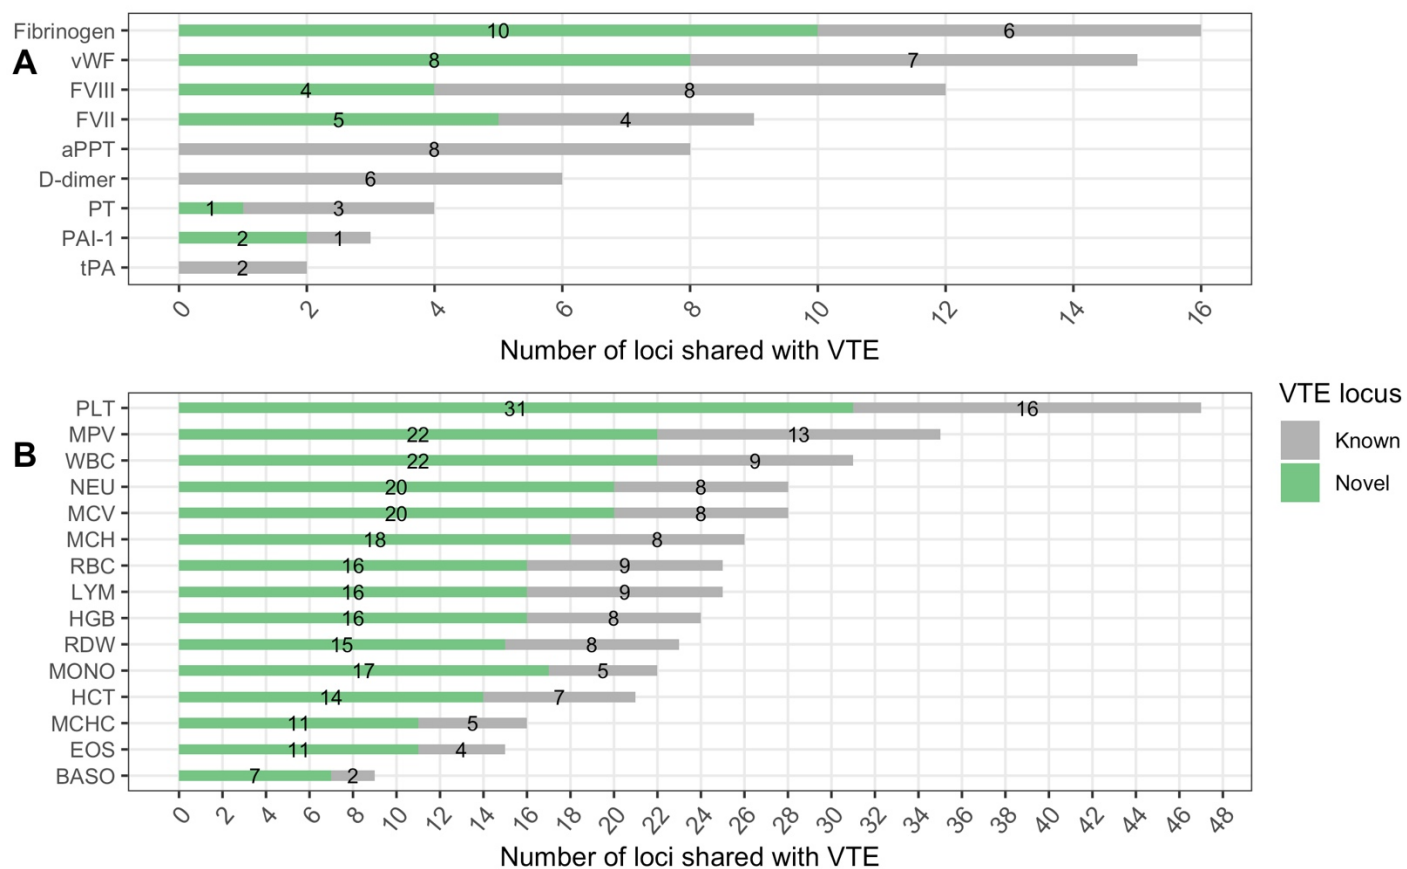

1004

1005 (A) Number of known and novel VTE loci shared with each of the 10 hemostatic factors investigated. (B) Same analysis with  
 1006 complete blood count traits: PLT (platelet count), MPV (mean platelet volume), RBC (red blood cell count), MCV (mean corpuscular  
 1007 volume), HCT (hematocrit), MCH (mean corpuscular hemoglobin), MCHC (MCH concentration), HGB (hemoglobin concentration),  
 1008 RDW (red cell distribution width), WBC (white blood cell count), MONO (monocyte count), NEU (neutrophil count), EOS (eosinophil  
 1009 count), BASO (basophil count), LYM (lymphocyte count).



1010 Figure 5: PheWAS traits sharing at least 10 loci with VTE

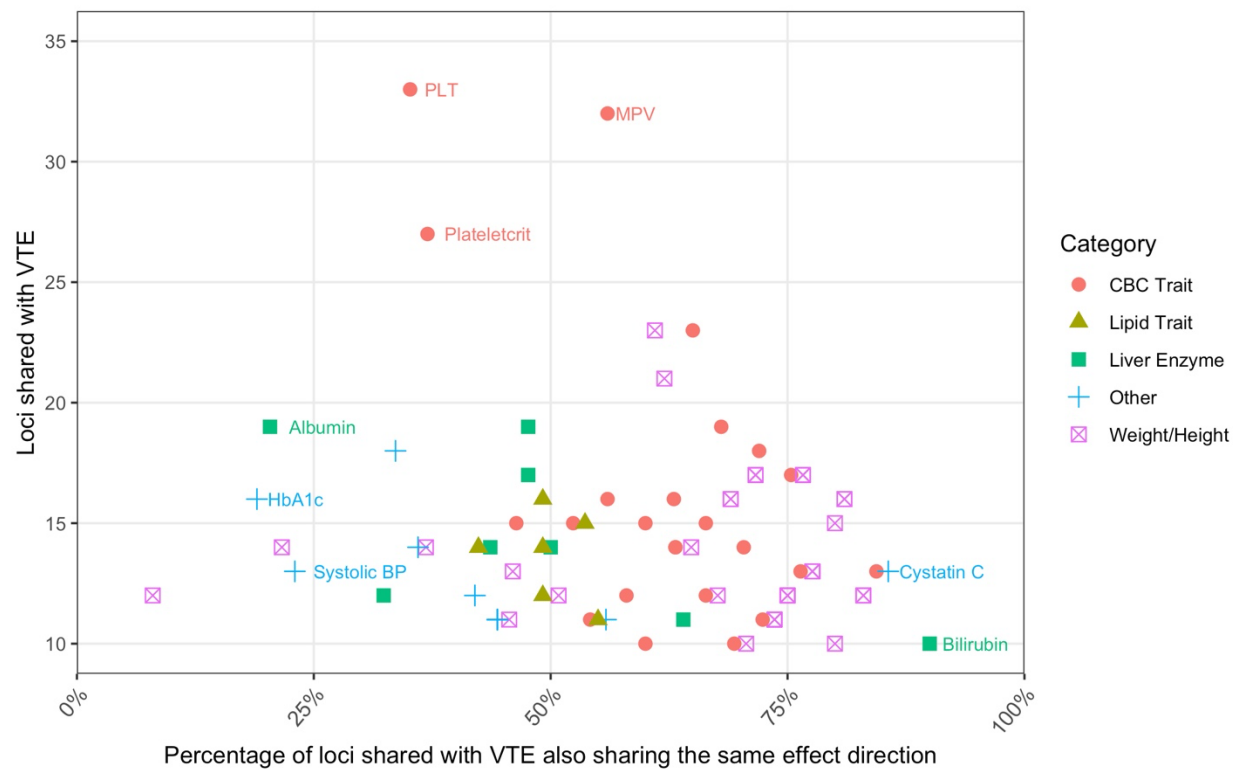

1011

1012 This figure presents the pheWAS traits sharing at least 10 loci with VTE. Shape and color represent one of 5 categories: Complete  
 1013 Blood Count (CBC) traits, lipid traits, liver enzyme, height and weight traits, or other (if the trait did not fit in one of the  
 1014 aforementioned categories). The x-axis indicates the number of loci shared between VTE and the pheWAS trait, while the y-axis  
 1015 indicates the proportion of loci where the direction of effect was identical between the pheWAS trait and VTE. As a result, traits  
 1016 close to 100% have the same direction of effect than VTE at most shared loci, while traits close to 0% have an opposite direction  
 1017 than VTE at most shared loci

1018 **Tables**

1019

1020

1021 Table 1: 68 Lead variants from the Discovery meta-analysis successfully replicated

1022

| rsID        | CHR:POS:EA:NEA   | EAF.Disc | OR.Disc | P.Disc    | OR.Repl | P.Repl     | Locus.Context  | Locus.Gene              |
|-------------|------------------|----------|---------|-----------|---------|------------|----------------|-------------------------|
| rs9442580   | 1:9339467:T:C    | 0.1551   | 1.06    | 1.83E-08  | 1.03    | 9.70E-05   | intergenic     | <b>H6PD;SPSB1</b>       |
| rs3767812   | 1:118155620:A:G  | 0.2437   | 1.05    | 9.64E-11  | 1.06    | 1.03E-20   | intronic       | <b>TENT5C</b>           |
| rs6025      | 1:169519049:T:C  | 0.0259   | 3.02    | 8.40E-811 | 3.59    | 9.29E-3103 | exonic         | <i>F5</i> (p.Q534Q)     |
| rs2842700   | 1:207282149:A:C  | 0.1092   | 1.11    | 5.95E-17  | 1.12    | 1.19E-25   | intronic       | <i>C4BPA</i>            |
| rs3811444   | 1:248039451:T:C  | 0.3324   | 0.96    | 5.70E-09  | 0.95    | 1.53E-20   | exonic         | <b>TRIM58</b> (p.T374M) |
| rs7600986   | 2:68636923:A:T   | 0.2819   | 1.06    | 3.54E-12  | 1.05    | 9.18E-19   | intergenic     | <i>PLEK;FBXO48</i>      |
| rs182293241 | 2:128029746:A:G  | 0.0195   | 1.89    | 1.83E-27  | 1.55    | 0.0001063  | intronic       | <i>ERCC3</i>            |
| rs6719550   | 2:188272460:T:C  | 0.6639   | 1.04    | 7.56E-09  | 1.05    | 1.93E-17   | intronic       | <b>CALCRL</b>           |
| rs715       | 2:211543055:T:C  | 0.7022   | 0.95    | 3.51E-09  | 0.95    | 1.43E-17   | UTR3           | <b>CPS1</b>             |
| rs13412535  | 2:224874874:A:G  | 0.2047   | 1.06    | 3.05E-10  | 1.08    | 1.10E-36   | intronic       | <b>SERPINE2</b>         |
| rs13084580  | 3:39188182:T:C   | 0.1076   | 1.09    | 2.89E-15  | 1.08    | 9.10E-22   | exonic         | <i>CSRNP1</i> (p.G18S)  |
| rs562281690 | 3:90177913:T:G   | 0.0024   | 2.01    | 6.45E-15  | 2.40    | 8.68E-31   | intergenic     | <i>EPHA3;NONE</i>       |
| rs62282204  | 3:138584405:T:C  | 0.5784   | 0.96    | 1.87E-08  | 0.98    | 6.73E-05   | intergenic     | <b>PIK3CB;LINC01391</b> |
| rs7613621   | 3:169191186:A:G  | 0.4467   | 1.04    | 3.21E-09  | 1.03    | 5.33E-09   | intronic       | <b>MECOM</b>            |
| rs710446    | 3:186459927:T:C  | 0.5799   | 0.96    | 5.92E-11  | 0.96    | 1.41E-16   | exonic         | <i>KNG1</i> (p.I581I)   |
| rs6797948   | 3:194784705:T:C  | 0.7983   | 1.06    | 2.99E-11  | 1.05    | 7.59E-16   | intergenic     | <b>LINC01968;XXYLT1</b> |
| rs6826579   | 4:83785031:T:C   | 0.7914   | 1.05    | 2.38E-08  | 1.03    | 2.44E-07   | intronic       | <b>SEC31A</b>           |
| rs17010957  | 4:86719165:T:C   | 0.8581   | 1.06    | 3.99E-09  | 1.05    | 1.00E-11   | intronic       | <b>ARHGAP24</b>         |
| rs2066864   | 4:155525695:A:G  | 0.2585   | 1.23    | 1.98E-172 | 1.23    | 1.94E-284  | UTR3           | <i>FGG</i>              |
| rs3756011   | 4:187206249:A:C  | 0.3903   | 1.23    | 7.48E-198 | 1.24    | 9.26e-398  | intronic       | <i>F11</i>              |
| rs16867574  | 5:38708554:T:C   | 0.6673   | 0.95    | 2.78E-11  | 0.95    | 5.67E-16   | ncRNA_intronic | <i>OSMR-AS1</i>         |
| rs38032     | 5:96321887:T:C   | 0.6049   | 1.04    | 8.74E-09  | 1.03    | 1.49E-09   | intronic       | <b>LNPEP</b>            |
| rs9268881   | 6:32431606:A:T   | 0.5727   | 0.96    | 4.17E-10  | 0.97    | 6.73E-09   | intergenic     | <b>HLA-DRA;HLA-DRB5</b> |
| rs145294670 | 6:34622561:A:AG  | 0.1385   | 1.06    | 6.11E-10  | 1.04    | 6.89E-06   | intronic       | <b>ILRUN</b>            |
| rs9390460   | 6:147694334:T:C  | 0.4957   | 0.95    | 2.49E-13  | 0.95    | 1.01E-20   | intronic       | <i>STXBP5</i>           |
| rs67694436  | 8:6654220:T:C    | 0.3486   | 0.96    | 3.94E-08  | 0.98    | 0.0001105  | intergenic     | <b>AGPAT5;XKRS</b>      |
| rs2685417   | 8:27807434:C:G   | 0.2562   | 1.06    | 1.57E-14  | 1.06    | 2.84E-25   | intronic       | <i>SCARA5</i>           |
| rs6993770   | 8:106581528:A:T  | 0.7142   | 1.08    | 4.48E-25  | 1.09    | 3.55E-48   | intronic       | <i>ZFPM2</i>            |
| rs35208412  | 9:99194509:A:AT  | 0.8298   | 1.09    | 1.56E-08  | 1.04    | 5.54E-06   | intergenic     | <b>ZNF367;HABP4</b>     |
| rs505922    | 9:136149229:T:C  | 0.6334   | 0.74    | 1.11E-425 | 0.69    | 1.55E-1043 | intronic       | <i>ABO</i>              |
| rs1887091   | 10:14535113:T:C  | 0.4936   | 0.96    | 4.77E-08  | 0.98    | 0.001107   | intergenic     | <b>MIR1265;FAM107B</b>  |
| rs17490626  | 10:71218646:C:G  | 0.1136   | 0.80    | 1.02E-79  | 0.80    | 3.23E-160  | intronic       | <i>TSPAN15</i>          |
| rs16937003  | 10:80938499:A:G  | 0.0287   | 1.15    | 1.07E-08  | 1.11    | 2.11E-11   | intronic       | <b>ZMIZ1</b>            |
| rs2274224   | 10:96039597:C:G  | 0.4414   | 1.04    | 2.55E-09  | 1.03    | 1.29E-10   | exonic         | <b>PLCE1</b> (p.R1267P) |
| rs10886430  | 10:121010256:A:G | 0.8897   | 0.89    | 7.34E-25  | 0.88    | 2.76E-64   | intronic       | <i>GRK5</i>             |
| rs11032074  | 11:32993887:A:G  | 0.7792   | 1.05    | 5.37E-09  | 1.03    | 3.24E-06   | intronic       | <i>QSER1</i>            |
| rs1799963   | 11:46761055:A:G  | 0.0136   | 2.05    | 2.19E-135 | 2.09    | 6.86E-420  | UTR3           | <i>F2</i>               |
| rs141687379 | 11:56666822:A:G  | 0.9953   | 0.52    | 3.56E-31  | 0.64    | 1.06E-42   | intronic       | <i>FADS2B</i>           |
| rs174551    | 11:61573684:T:C  | 0.6583   | 1.07    | 1.65E-19  | 1.07    | 4.90E-35   | intronic       | <i>FADS1</i>            |
| rs35257264  | 11:126296816:T:C | 0.0212   | 1.21    | 2.88E-14  | 1.18    | 2.28E-24   | intronic       | <b>ST3GAL4</b>          |
| rs1558519   | 12:6153738:A:G   | 0.6175   | 0.93    | 7.73E-24  | 0.92    | 1.42E-55   | intronic       | <i>VWF</i>              |
| rs7311483   | 12:9053661:T:C   | 0.3589   | 0.96    | 2.74E-09  | 0.97    | 2.73E-07   | intergenic     | <b>A2ML1;PHC1</b>       |
| rs6580981   | 12:54723028:A:G  | 0.5081   | 0.96    | 3.71E-09  | 0.95    | 2.26E-23   | intronic       | <b>COP21</b>            |
| rs3184504   | 12:111884608:T:C | 0.4520   | 1.05    | 1.18E-11  | 1.04    | 3.30E-12   | exonic         | <b>SH2B3</b> (p.T178T)  |
| rs3211752   | 13:113787459:A:G | 0.5527   | 0.95    | 1.69E-12  | 0.94    | 3.49E-25   | intronic       | <i>F10</i>              |
| rs57035593  | 14:92268096:T:C  | 0.3202   | 1.07    | 1.08E-20  | 1.07    | 2.64E-38   | intronic       | <i>TC2N</i>             |
| rs8013957   | 14:103140254:T:C | 0.3699   | 1.04    | 5.33E-09  | 1.03    | 2.23E-07   | intronic       | <b>RCOR1</b>            |
| rs55707100  | 15:43820717:T:C  | 0.0270   | 0.87    | 2.90E-08  | 0.84    | 2.49E-27   | exonic         | <b>MAP1A</b> (p.P2349L) |

|             |                     |        |      |          |      |           |                |                        |
|-------------|---------------------|--------|------|----------|------|-----------|----------------|------------------------|
| rs59442804  | 15:60899031:G:GAAAT | 0.6438 | 0.96 | 4.67E-08 | 0.97 | 5.42E-10  | ncRNA_intronic | <b>RORA-AS1</b>        |
| rs12443808  | 16:30996871:C:G     | 0.4668 | 1.06 | 3.89E-14 | 1.03 | 1.85E-07  | UTR5           | <b>HSD3B7</b>          |
| rs56943275  | 16:81898152:T:G     | 0.2446 | 1.08 | 4.15E-13 | 1.07 | 1.20E-26  | intronic       | <i>PLCG2</i>           |
| rs28634651  | 16:88553198:T:C     | 0.6191 | 1.06 | 9.20E-13 | 1.04 | 7.62E-14  | intronic       | <b>ZFPM1</b>           |
| rs6503222   | 17:1977862:A:G      | 0.6188 | 1.05 | 1.59E-12 | 1.04 | 5.21E-06  | intronic       | <i>SMG6</i>            |
| rs7225756   | 17:6893691:A:G      | 0.4877 | 0.96 | 3.57E-08 | 0.98 | 1.20E-06  | ncRNA_intronic | <b>ALOX12-AS1</b>      |
| rs62054822  | 17:43927708:A:G     | 0.8028 | 0.95 | 6.39E-09 | 0.95 | 7.11E-19  | ncRNA_intronic | <b>MAPT-AS1</b>        |
| rs142140545 | 17:64191540:CTATT:C | 0.1169 | 0.93 | 2.27E-08 | 0.95 | 7.83E-07  | intergenic     | <b>CEP112;APOH</b>     |
| rs59277920  | 19:6077231:A:G      | 0.8210 | 0.94 | 1.47E-09 | 0.96 | 8.52E-06  | intronic       | <b>RFX2</b>            |
| rs8110055   | 19:10739143:A:C     | 0.2000 | 0.89 | 5.36E-44 | 0.89 | 6.50E-70  | intronic       | <i>SLC44A2</i>         |
| rs34783010  | 19:46180414:T:G     | 0.2132 | 0.95 | 3.25E-09 | 0.96 | 4.87E-10  | intronic       | <b>GIPR</b>            |
| rs1688264   | 19:49209560:T:G     | 0.5341 | 0.96 | 2.07E-10 | 0.96 | 3.02E-15  | downstream     | <b>FUT2</b>            |
| rs1654425   | 19:55538980:T:C     | 0.1468 | 0.91 | 2.65E-18 | 0.94 | 4.21E-14  | exonic         | <i>GP6 (p.S192S)</i>   |
| rs79388863  | 20:23168500:A:G     | 0.1521 | 0.92 | 1.74E-18 | 0.92 | 4.48E-27  | intergenic     | <i>LINC00656;NXT1</i>  |
| rs6060288   | 20:33772243:A:G     | 0.3417 | 1.12 | 8.19E-54 | 1.13 | 1.52E-102 | intronic       | <i>MMP24-AS1-EDEM2</i> |
| rs4820093   | 22:33160208:T:C     | 0.2693 | 1.05 | 1.04E-08 | 1.04 | 5.39E-14  | intronic       | <b>SYN3</b>            |
| rs9611844   | 22:43115776:C:G     | 0.1286 | 1.10 | 2.09E-21 | 1.07 | 7.54E-20  | intronic       | <i>A4GALT</i>          |
| rs3002416   | 23:39710195:T:C     | 0.3638 | 0.95 | 2.20E-18 | 0.93 | 2.23E-23  | intergenic     | <i>MIR1587;BCOR</i>    |
| rs6048      | 23:138633280:A:G    | 0.7215 | 1.07 | 1.09E-25 | 1.08 | 1.59E-46  | exonic         | <i>F9 (p.T156T)</i>    |
| rs2084408   | 23:154346709:T:G    | 0.3764 | 0.94 | 5.36E-19 | 0.94 | 6.27E-09  | intronic       | <i>BRCC3</i>           |

1023  
 1024 CHR: chromosome; POS: position (hg19 build); EA: effect allele; NEA: non effect allele; EAF: effect allele frequency; OR: odd  
 1025 ratio; P: P-value. Results from the discovery are in presented in columns suffixed with "Disc", while results from the replication  
 1026 are in columns suffixed with "Repl". Novel genetic associations are indicated as bold gene names.

1027  
 1028  
 1029  
 1030  
 1031  
 1032  
 1033  
 1034  
 1035  
 1036  
 1037  
 1038  
 1039  
 1040  
 1041  
 1042  
 1043  
 1044  
 1045  
 1046  
 1047  
 1048  
 1049  
 1050

1051 Table 2: Additional 44 candidate novel loci identified in the Overall, European and African meta-  
 1052 analyses  
 1053

| rsID                                                                  | CHR:POS:EA:NEA      | EAF    | EFFECT  | SE     | OR   | P        | Locus.context  | Locus.Gene             |
|-----------------------------------------------------------------------|---------------------|--------|---------|--------|------|----------|----------------|------------------------|
| <b>Novel loci identified in the overall meta-analysis</b>             |                     |        |         |        |      |          |                |                        |
| rs551176418                                                           | 1:27107263:T:TC     | 0.9248 | 0.0759  | 0.0132 | 1.08 | 9.61E-09 | UTR3           | ARID1A                 |
| rs6695572                                                             | 1:77945635:A:G      | 0.1938 | 0.0424  | 0.0072 | 1.04 | 4.28E-09 | intronic       | AK5                    |
| rs3832016                                                             | 1:109818158:CT:C    | 0.7627 | -0.0449 | 0.0066 | 0.96 | 8.95E-12 | UTR3           | CELSR2                 |
| rs1267881263                                                          | 1:150496127:CA:C    | 0.5468 | 0.0426  | 0.0076 | 1.04 | 2.36E-08 | intergenic     | FALEC;ADAMTSL4         |
| rs905938                                                              | 1:154991389:T:C     | 0.7448 | -0.0346 | 0.0063 | 0.97 | 3.70E-08 | intronic       | DCST2                  |
| rs3557                                                                | 1:161188893:T:G     | 0.9182 | 0.0654  | 0.0106 | 1.07 | 7.70E-10 | UTR3           | FCER1G                 |
| rs143410348                                                           | 1:196809316:T:TAA   | 0.5434 | 0.0415  | 0.0074 | 1.04 | 2.44E-08 | intergenic     | CFHR1;CFHR4            |
| rs78475244                                                            | 2:65086804:T:C      | 0.0542 | -0.0713 | 0.0128 | 0.93 | 2.52E-08 | ncRNA_intronic | LINC01800              |
| rs78872368                                                            | 2:198545250:C:G     | 0.1919 | -0.0412 | 0.0071 | 0.96 | 7.27E-09 | intergenic     | RFTN2;MARS2            |
| rs900399                                                              | 3:156798732:A:G     | 0.6205 | 0.0382  | 0.0060 | 1.04 | 1.46E-10 | intergenic     | LINC02029;LINC00880    |
| rs9654093                                                             | 4:7903763:C:G       | 0.1504 | 0.0492  | 0.0081 | 1.05 | 1.03E-09 | intronic       | AFAP1                  |
| rs781656                                                              | 4:57778645:A:G      | 0.1963 | 0.0389  | 0.0070 | 1.04 | 2.26E-08 | intronic       | REST                   |
| rs7730244                                                             | 5:72957088:T:C      | 0.5245 | -0.0328 | 0.0057 | 0.97 | 1.04E-08 | intronic       | ARHGEF28               |
| rs147133967                                                           | 5:132426851:G:GTT   | 0.0810 | -0.0659 | 0.0110 | 0.94 | 2.43E-09 | intronic       | HSPA4                  |
| rs214059                                                              | 6:25536937:T:C      | 0.4331 | 0.0357  | 0.0055 | 1.04 | 1.01E-10 | intronic       | CARMIL1                |
| rs2394251                                                             | 6:29943688:G:C      | 0.7331 | -0.0405 | 0.0063 | 0.96 | 1.43E-10 | ncRNA_intronic | HCG9                   |
| rs1513275                                                             | 7:28259233:T:C      | 0.7453 | 0.0449  | 0.0070 | 1.05 | 1.40E-10 | ncRNA_intronic | JAZF1-AS1              |
| rs10099512                                                            | 8:9178821:C:G       | 0.1105 | 0.0608  | 0.0105 | 1.06 | 6.98E-09 | intergenic     | LOC101929128;LOC157273 |
| rs2048528                                                             | 8:23373680:A:G      | 0.3089 | -0.0347 | 0.0060 | 0.97 | 5.77E-09 | intergenic     | ENTPD4;SLC25A37        |
| rs2915595                                                             | 8:30402817:A:G      | 0.2391 | 0.0365  | 0.0065 | 1.04 | 2.52E-08 | intronic       | RBPMS                  |
| rs4236786                                                             | 8:108291878:C:G     | 0.2492 | 0.0353  | 0.0064 | 1.04 | 3.93E-08 | intronic       | ANGPT1                 |
| rs1243187                                                             | 10:21907016:T:C     | 0.6920 | -0.0341 | 0.0061 | 0.97 | 2.53E-08 | intronic       | MLLT10                 |
| rs4272700                                                             | 10:27881308:A:T     | 0.2726 | 0.0395  | 0.0064 | 1.04 | 7.75E-10 | intergenic     | RAB18;MKX              |
| rs2030291                                                             | 11:16251251:A:T     | 0.6077 | -0.0325 | 0.0056 | 0.97 | 8.19E-09 | intronic       | SOX6                   |
| rs4354705                                                             | 11:60088159:C:G     | 0.3635 | 0.0315  | 0.0058 | 1.03 | 4.83E-08 | intergenic     | MS4A4A;MS4A6E          |
| rs2846027                                                             | 11:114003415:T:C    | 0.3112 | -0.0344 | 0.0061 | 0.97 | 1.42E-08 | intronic       | ZBTB16                 |
| rs7107568                                                             | 11:130779668:T:C    | 0.5610 | -0.0303 | 0.0056 | 0.97 | 4.71E-08 | intronic       | SNX19                  |
| rs2127869                                                             | 14:65794352:T:C     | 0.3350 | -0.0340 | 0.0062 | 0.97 | 4.68E-08 | intergenic     | LINC02324;MIR4708      |
| rs7183672                                                             | 15:96101018:A:G     | 0.6432 | -0.0358 | 0.0062 | 0.96 | 7.34E-09 | intergenic     | LINC00924;LOC105369212 |
| rs71376077                                                            | 16:15738114:C:G     | 0.9728 | 0.1408  | 0.0249 | 1.15 | 1.57E-08 | intronic       | NDE1                   |
| rs7197453                                                             | 16:72079127:C:G     | 0.3572 | 0.0315  | 0.0057 | 1.03 | 3.19E-08 | intergenic     | DHODH;HP               |
| rs77246010                                                            | 16:75429853:T:C     | 0.4489 | 0.0408  | 0.0069 | 1.04 | 4.12E-09 | intronic       | CFDP1                  |
| rs8049403                                                             | 16:85778651:A:G     | 0.0214 | 0.1365  | 0.0248 | 1.15 | 3.91E-08 | intronic       | C16orf74               |
| rs71138827                                                            | 17:27833678:A:AGATT | 0.4288 | 0.0336  | 0.0058 | 1.03 | 5.89E-09 | intronic       | TAOK1                  |
| rs2545774                                                             | 19:41287674:T:C     | 0.2528 | -0.0378 | 0.0065 | 0.96 | 6.80E-09 | intronic       | RAB4B                  |
| <b>Additional novel loci identified in the European meta-analysis</b> |                     |        |         |        |      |          |                |                        |
| rs4540639                                                             | 1:192104320:C:G     | 0.4675 | 0.0346  | 0.0060 | 1.04 | 6.88E-09 | intergenic     | LINC01680;RGS18        |
| rs35225200                                                            | 4:103146888:A:C     | 0.9190 | -0.0645 | 0.0115 | 0.94 | 1.89E-08 | intergenic     | BANK1;SLC39A8          |
| rs112367053                                                           | 5:28379046:T:G      | 0.6662 | 0.0586  | 0.0107 | 1.06 | 4.07E-08 | intergenic     | LINC02103;LSP1P3       |
| rs2754251                                                             | 6:88385949:A:G      | 0.0584 | 0.0715  | 0.0129 | 1.07 | 2.65E-08 | intronic       | AKIRIN2                |
| rs10763665                                                            | 10:28771491:C:G     | 0.5783 | -0.0342 | 0.0062 | 0.97 | 3.13E-08 | ncRNA_intronic | LINC02652              |
| rs7122100                                                             | 11:10732560:A:C     | 0.2411 | 0.0410  | 0.0075 | 1.04 | 4.93E-08 | intergenic     | IRAG1;CTR9             |
| rs1145656                                                             | 11:73305859:A:C     | 0.8171 | -0.0442 | 0.0079 | 1.05 | 2.00E-08 | upstream       | FAM168A                |
| <b>Additional novel loci identified in the African meta-analysis</b>  |                     |        |         |        |      |          |                |                        |
| rs76668186                                                            | 16:6686083:A:T      | 0.9597 | -0.5776 | 0.1056 | 0.56 | 4.52E-08 | intronic       | RBFOX1                 |
| rs114102448                                                           | 21:47523605:A:G     | 0.0114 | 0.9527  | 0.1725 | 2.60 | 4.11E-08 | intronic       | COL6A2                 |

1054

1055 CHR: chromosome; POS: position (hg19 build); EA: effect allele; NEA: non effect allele; EAF: effect allele frequency; SE: Standard

1056 Error of Effect; OR: odd ratio; P: P-value.
