# Supplementary material for: Cross-Ancestry Investigation of Venous Thromboembolism Genomic Predictors
Source: bioRxiv or medRxiv preprint supplement (doi:10.1101/2022.03.04.22271003), 2022-03-08

## Supplementary Figure 1.

### Forest plots of Discovery analysis lead variants.

|      |                                                              |    |
|------|--------------------------------------------------------------|----|
| 1.1  | rs9442580 (chr1:9339467) in locus 1 (H6PD;SPSB1)             | 3  |
| 1.2  | rs3767812 (chr1:118155620) in locus 5 (TENT5C)               | 3  |
| 1.3  | rs6025 (chr1:169519049) in locus 9 (F5)                      | 4  |
| 1.4  | rs2842700 (chr1:207282149) in locus 13 (C4BPA)               | 4  |
| 1.5  | rs3811444 (chr1:248039451) in locus 14 (TRIM58)              | 5  |
| 1.6  | rs545891600 (chr2:5378301) in locus 15 (LINC01249;LINC01248) | 5  |
| 1.7  | rs7600986 (chr2:68636923) in locus 17 (PLEK;FBXO48)          | 6  |
| 1.8  | rs182293241 (chr2:128029746) in locus 18 (ERCC3)             | 6  |
| 1.9  | rs6719550 (chr2:188272460) in locus 19 (CALCRL)              | 7  |
| 1.10 | rs715 (chr2:211543055) in locus 21 (CPS1)                    | 7  |
| 1.11 | rs13412535 (chr2:224874874) in locus 22 (SERPINE2)           | 8  |
| 1.12 | rs2960420 (chr3:12314512) in locus 23 (SYN2;PPARG)           | 8  |
| 1.13 | rs13084580 (chr3:39188182) in locus 24 (CSRNP1)              | 9  |
| 1.14 | rs11130326 (chr3:52771920) in locus 25 (NEK4)                | 9  |
| 1.15 | rs562281690 (chr3:90177913) in locus 26 (EPHA3;NONE)         | 10 |
| 1.16 | rs79324379 (chr3:93712671) in locus 27 (ARL13B)              | 10 |
| 1.17 | rs9872572 (chr3:123108613) in locus 28 (ADCY5)               | 11 |
| 1.18 | rs62282204 (chr3:138584405) in locus 29 (PIK3CB;LINC01391)   | 11 |
| 1.19 | rs7613621 (chr3:169191186) in locus 31 (MECOM)               | 12 |
| 1.20 | rs710446 (chr3:186459927) in locus 32 (KNG1)                 | 12 |
| 1.21 | rs6797948 (chr3:194784705) in locus 33 (LINC01968;XXYLT1)    | 13 |
| 1.22 | rs6826579 (chr4:83785031) in locus 36 (SEC31A)               | 13 |
| 1.23 | rs17010957 (chr4:86719165) in locus 37 (ARHGAP24)            | 14 |
| 1.24 | rs2066864 (chr4:155525695) in locus 39 (FGG)                 | 14 |
| 1.25 | rs3756011 (chr4:187206249) in locus 40 (F11)                 | 15 |
| 1.26 | rs16867574 (chr5:38708554) in locus 42 (OSMR-AS1)            | 15 |
| 1.27 | rs38032 (chr5:96321887) in locus 44 (LNPEP)                  | 16 |
| 1.28 | rs9268881 (chr6:32431606) in locus 48 (HLA-DRA;HLA-DRB5)     | 16 |
| 1.29 | rs145294670 (chr6:34622561) in locus 49 (ILRUN)              | 17 |
| 1.30 | rs903646797 (chr6:40985346) in locus 50 (LOC101929555)       | 17 |
| 1.31 | rs9390460 (chr6:147694334) in locus 52 (STXBP5)              | 18 |
| 1.32 | rs42036 (chr7:92241451) in locus 54 (CDK6)                   | 18 |
| 1.33 | rs538161377 (chr8:4206326) in locus 55 (CSMD1)               | 19 |
| 1.34 | rs67694436 (chr8:6654220) in locus 56 (AGPAT5;XKR5)          | 19 |
| 1.35 | rs7010926 (chr8:10626791) in locus 58 (PINX1)                | 20 |
| 1.36 | rs2685417 (chr8:27807434) in locus 60 (SCARA5)               | 20 |
| 1.37 | rs6993770 (chr8:106581528) in locus 62 (ZFPM2)               | 21 |
| 1.38 | rs77375493 (chr9:5073770) in locus 64 (JAK2)                 | 21 |
| 1.39 | rs35208412 (chr9:99194509) in locus 65 (ZNF367;HABP4)        | 22 |
| 1.40 | rs505922 (chr9:136149229) in locus 66 (ABO)                  | 22 |
| 1.41 | rs1887091 (chr10:14535113) in locus 67 (MIR1265;FAM107B)     | 23 |
| 1.42 | rs529892067 (chr10:43568540) in locus 71 (MIR5100;RET)       | 23 |
| 1.43 | rs17490626 (chr10:71218646) in locus 72 (TSPAN15)            | 24 |
| 1.44 | rs16937003 (chr10:80938499) in locus 73 (ZMIZ1)              | 24 |
| 1.45 | rs2274224 (chr10:96039597) in locus 74 (PLCE1)               | 25 |
| 1.46 | rs10886430 (chr10:121010256) in locus 75 (GRK5)              | 25 |
| 1.47 | rs11032074 (chr11:32993887) in locus 78 (QSER1)              | 26 |
| 1.48 | rs1799963 (chr11:46761055) in locus 79 (F2)                  | 26 |
| 1.49 | rs141687379 (chr11:56666822) in locus 80 (FADS2B)            | 27 |
| 1.50 | rs174551 (chr11:61573684) in locus 82 (FADS1)                | 27 |

|      |                                                           |    |
|------|-----------------------------------------------------------|----|
| 1.51 | rs35257264 (chr11:126296816) in locus 85 (ST3GAL4)        | 28 |
| 1.52 | rs1558519 (chr12:6153738) in locus 87 (VWF)               | 28 |
| 1.53 | rs7311483 (chr12:9053661) in locus 88 (A2ML1;PHC1)        | 29 |
| 1.54 | rs6580981 (chr12:54723028) in locus 89 (COPZ1)            | 29 |
| 1.55 | rs142351376 (chr12:104136288) in locus 90 (STAB2)         | 30 |
| 1.56 | rs3184504 (chr12:111884608) in locus 91 (SH2B3)           | 30 |
| 1.57 | rs75940120 (chr13:109686619) in locus 93 (MYO16)          | 31 |
| 1.58 | rs3211752 (chr13:113787459) in locus 94 (F10)             | 31 |
| 1.59 | rs57035593 (chr14:92268096) in locus 97 (TC2N)            | 32 |
| 1.60 | rs8013957 (chr14:103140254) in locus 99 (RCOR1)           | 32 |
| 1.61 | rs55707100 (chr15:43820717) in locus 100 (MAP1A)          | 33 |
| 1.62 | rs59442804 (chr15:60899031) in locus 101 (RORA-AS1)       | 33 |
| 1.63 | rs182906510 (chr15:67372922) in locus 102 (SMAD3)         | 34 |
| 1.64 | rs12443808 (chr16:30996871) in locus 106 (HSD3B7)         | 34 |
| 1.65 | rs56943275 (chr16:81898152) in locus 109 (PLCG2)          | 35 |
| 1.66 | rs28634651 (chr16:88553198) in locus 111 (ZFPM1)          | 35 |
| 1.67 | rs6503222 (chr17:1977862) in locus 112 (SMG6)             | 36 |
| 1.68 | rs7225756 (chr17:6893691) in locus 113 (ALOX12-AS1)       | 36 |
| 1.69 | rs62054822 (chr17:43927708) in locus 115 (MAPT-AS1)       | 37 |
| 1.70 | rs142140545 (chr17:64191540) in locus 116 (CEP112;APOH)   | 37 |
| 1.71 | rs59277920 (chr19:6077231) in locus 118 (RFX2)            | 38 |
| 1.72 | rs8110055 (chr19:10739143) in locus 119 (SLC44A2)         | 38 |
| 1.73 | rs34783010 (chr19:46180414) in locus 122 (GIPR)           | 39 |
| 1.74 | rs1688264 (chr19:49209560) in locus 123 (FUT2)            | 39 |
| 1.75 | rs1654425 (chr19:55538980) in locus 124 (GP6)             | 40 |
| 1.76 | rs2631628 (chr19:56645250) in locus 125 (ZNF787;ZNF444)   | 40 |
| 1.77 | rs79388863 (chr20:23168500) in locus 126 (LINC00656;NXT1) | 41 |
| 1.78 | rs6060288 (chr20:33772243) in locus 127 (MMP24-AS1-EDEM2) | 41 |
| 1.79 | rs4820093 (chr22:33160208) in locus 129 (SYN3)            | 42 |
| 1.80 | rs9611844 (chr22:43115776) in locus 130 (A4GALT)          | 42 |
| 1.81 | rs34609587 (chr23:11657363) in locus 131 (ARHGAP6)        | 43 |
| 1.82 | rs6632109 (chr23:34894638) in locus 132 (TMEM47;FAM47B)   | 43 |
| 1.83 | rs3002416 (chr23:39710195) in locus 133 (MIR1587;BCOR)    | 44 |
| 1.84 | rs6048 (chr23:138633280) in locus 134 (F9)                | 44 |
| 1.85 | rs2084408 (chr23:154346709) in locus 135 (BRCC3)          | 45 |

Supplementary Figure 1.1 – rs9442580 (chr1:9339467) in locus 1 (H6PD;SPSB1)

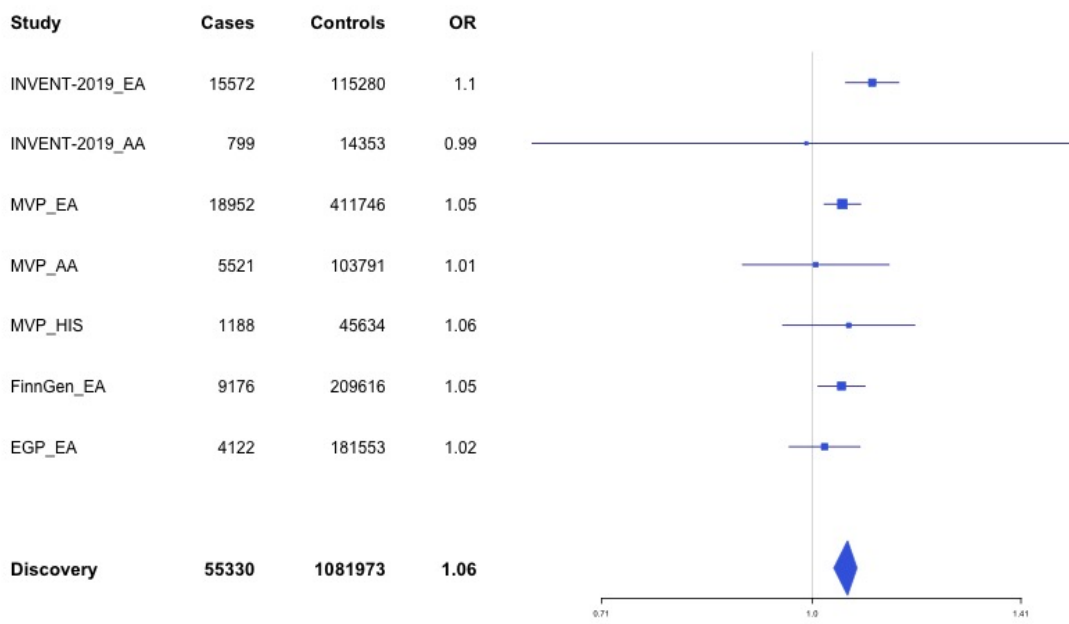

Supplementary Figure 1.2 – rs3767812 (chr1:118155620) in locus 5 (TENT5C)

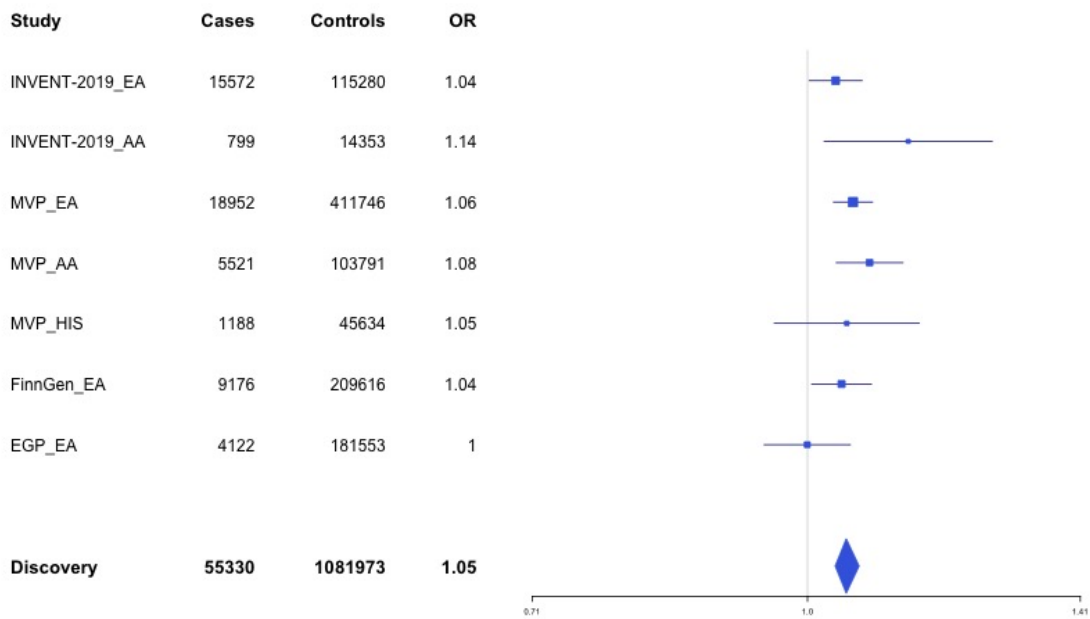

Supplementary Figure 1.3 – rs6025 (chr1:169519049) in locus 9 (F5)

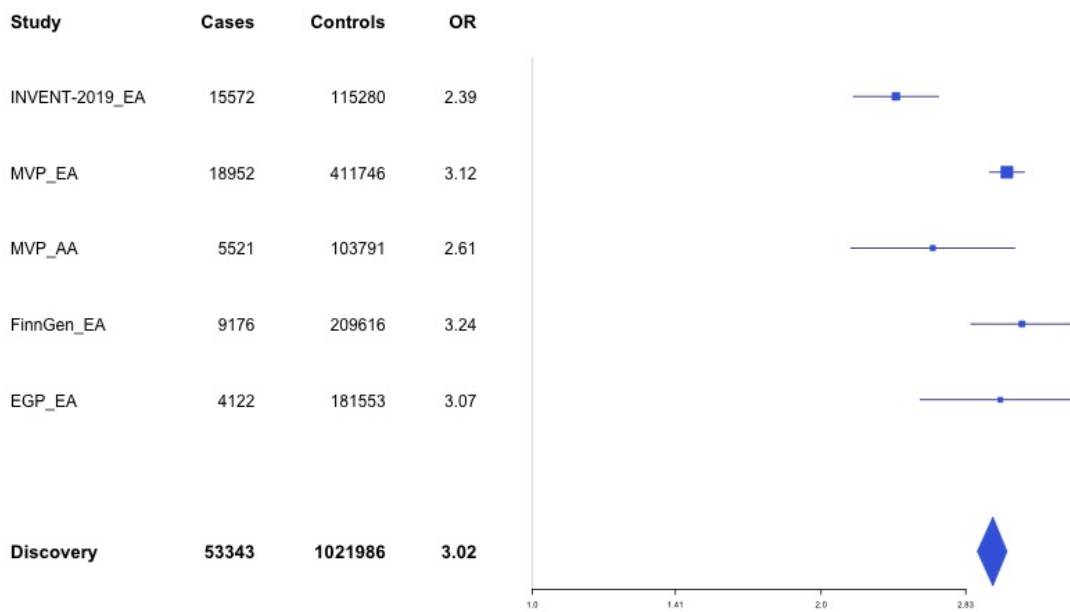

Supplementary Figure 1.4 – rs2842700 (chr1:207282149) in locus 13 (C4BPA)

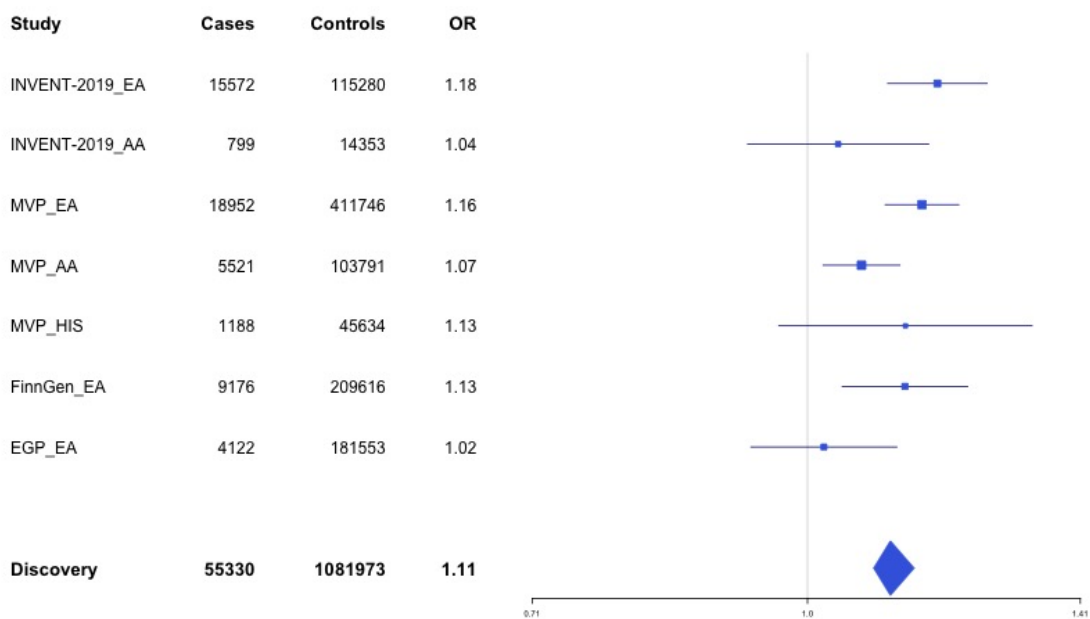

Supplementary Figure 1.5 – rs3811444 (chr1:248039451) in locus 14 (TRIM58)

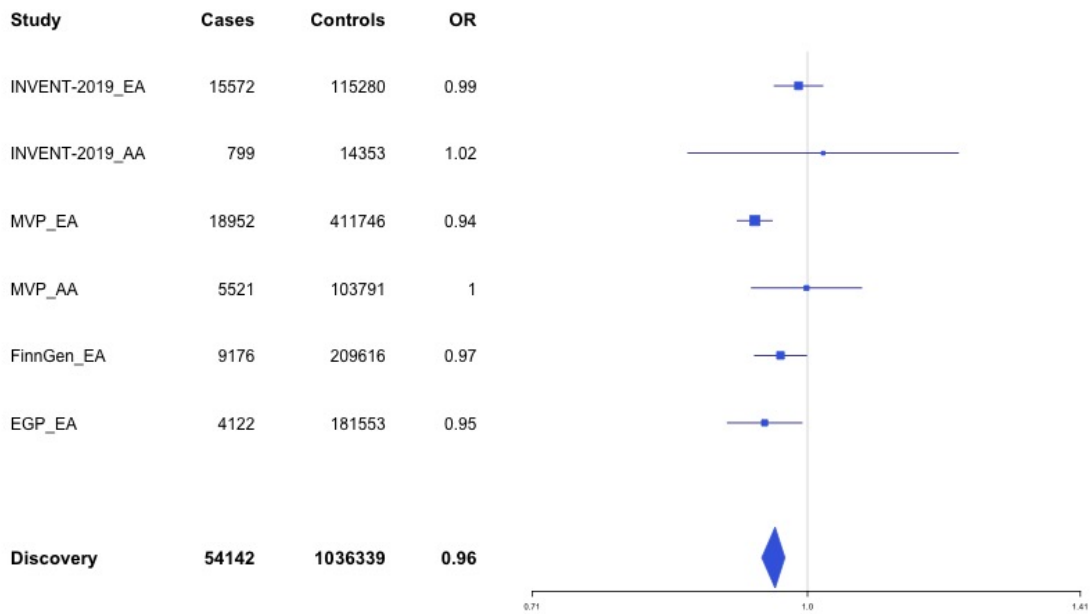

Supplementary Figure 1.6 – rs545891600 (chr2:5378301) in locus 15 (LINC01249;LINC01248)

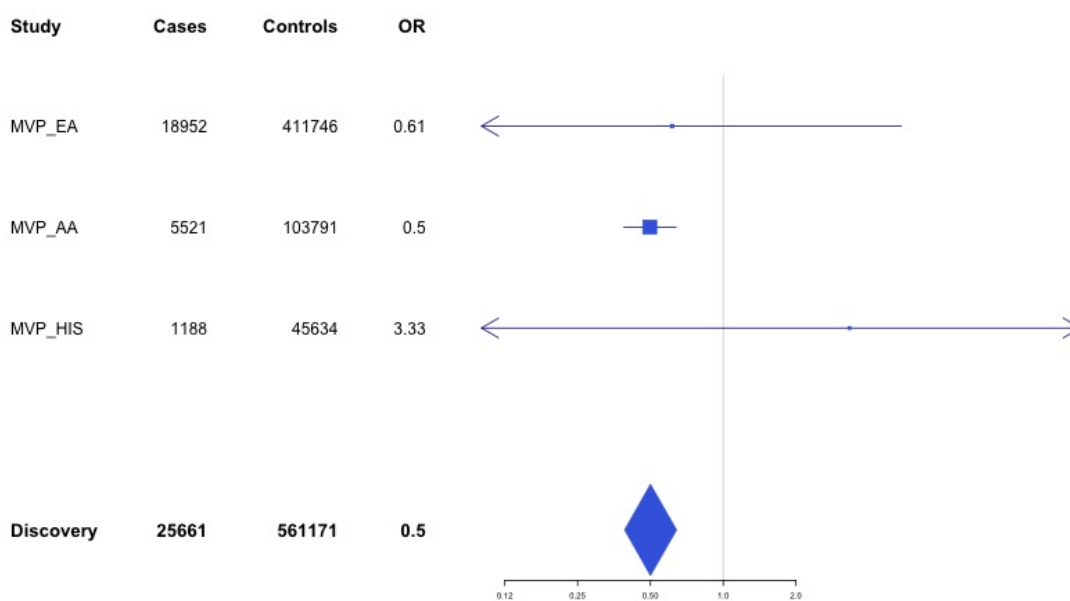

Supplementary Figure 1.7 – rs7600986 (chr2:68636923) in locus 17 (PLEK ;FBXO48)

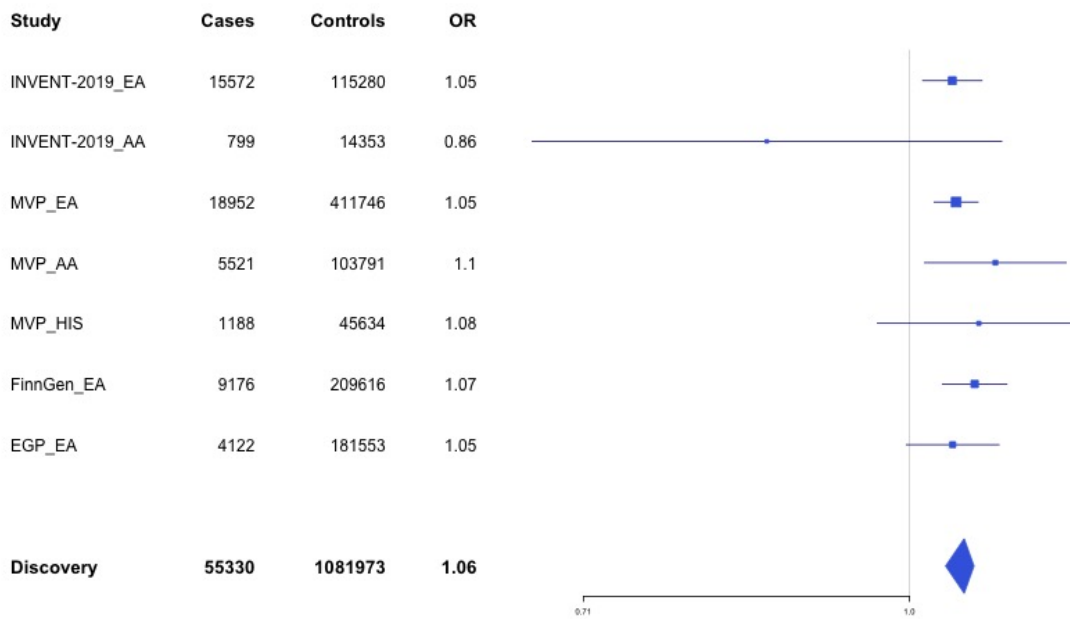

Supplementary Figure 1.8 – rs182293241 (chr2:128029746) in locus 18 (ERCC3)

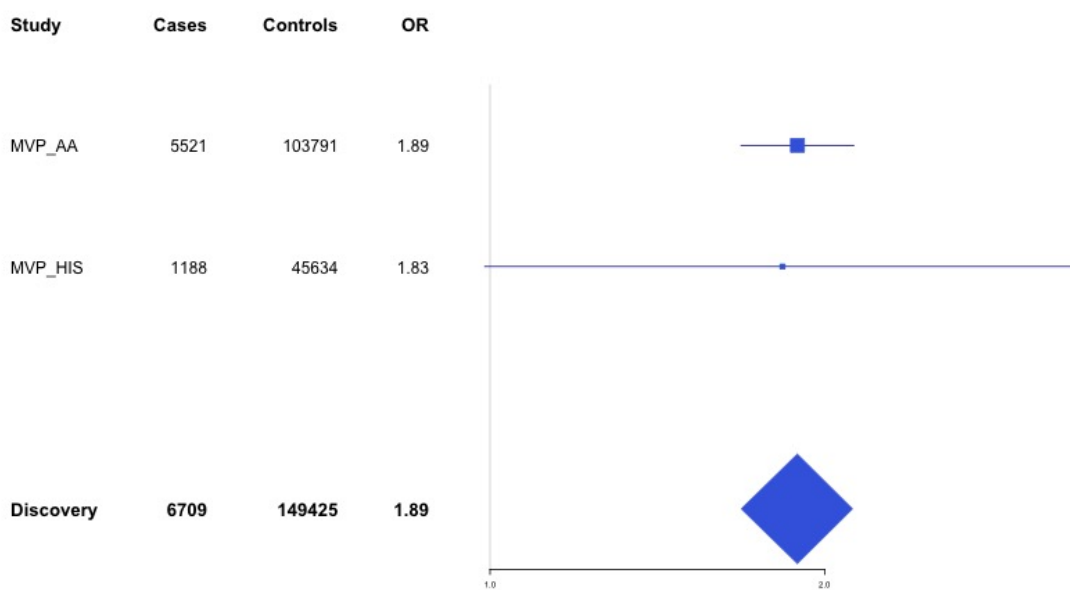

Supplementary Figure 1.9 – rs6719550 (chr2:188272460) in locus 19 (CALCRL)

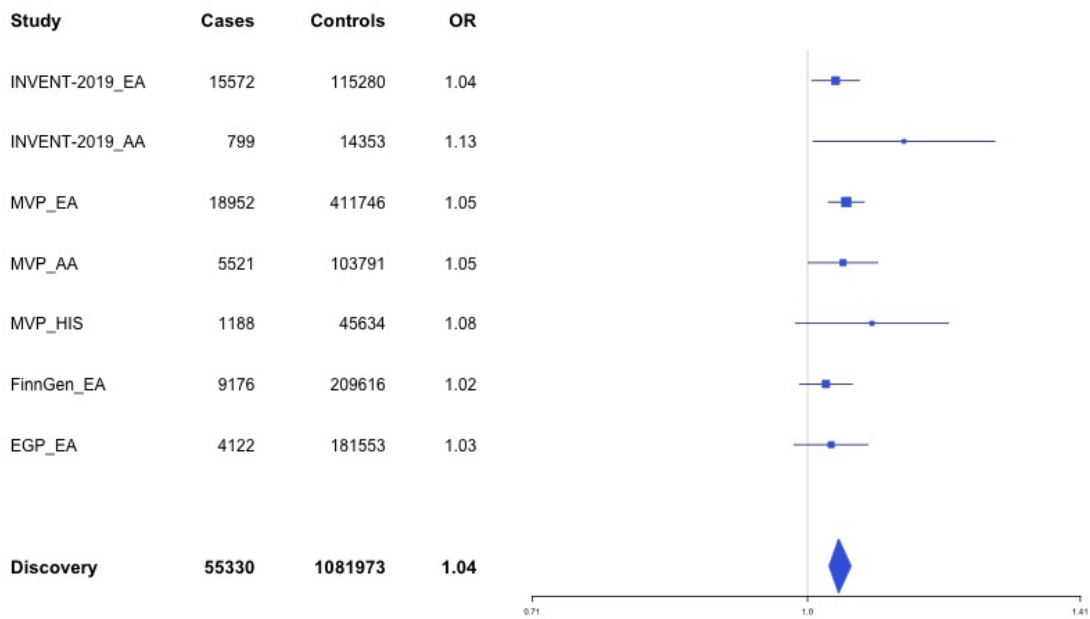

Supplementary Figure 1.10 – rs715 (chr2:211543055) in locus 21 (CPS1)

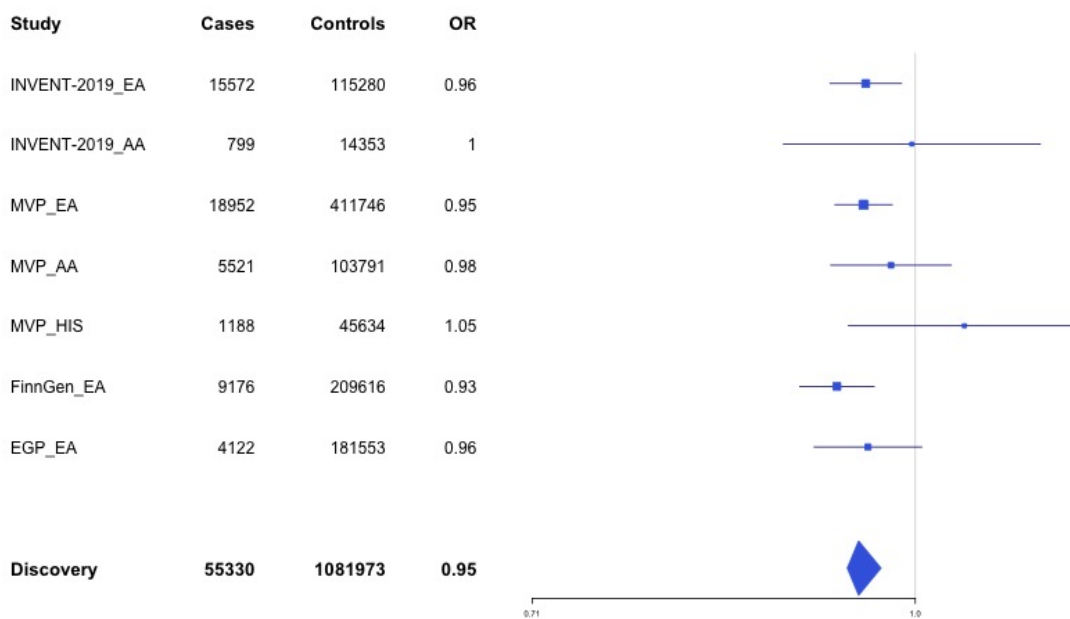

Supplementary Figure 1.11 – rs13412535 (chr2:224874874) in locus 22 (SERPINE2)

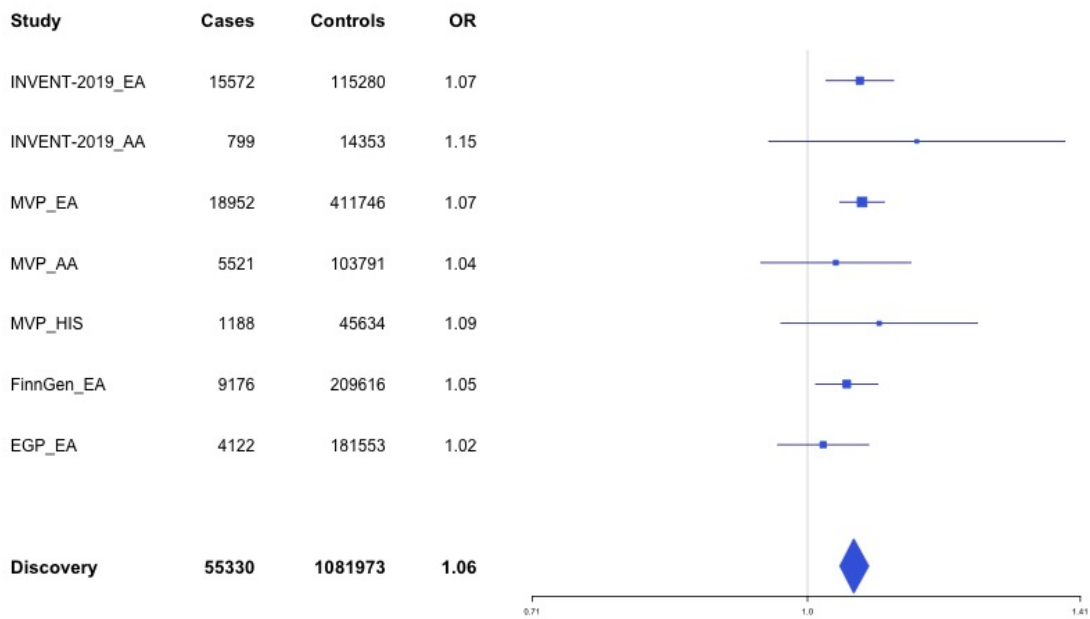

Supplementary Figure 1.12 – rs2960420 (chr3:12314512) in locus 23 (SYN2;PPARG)

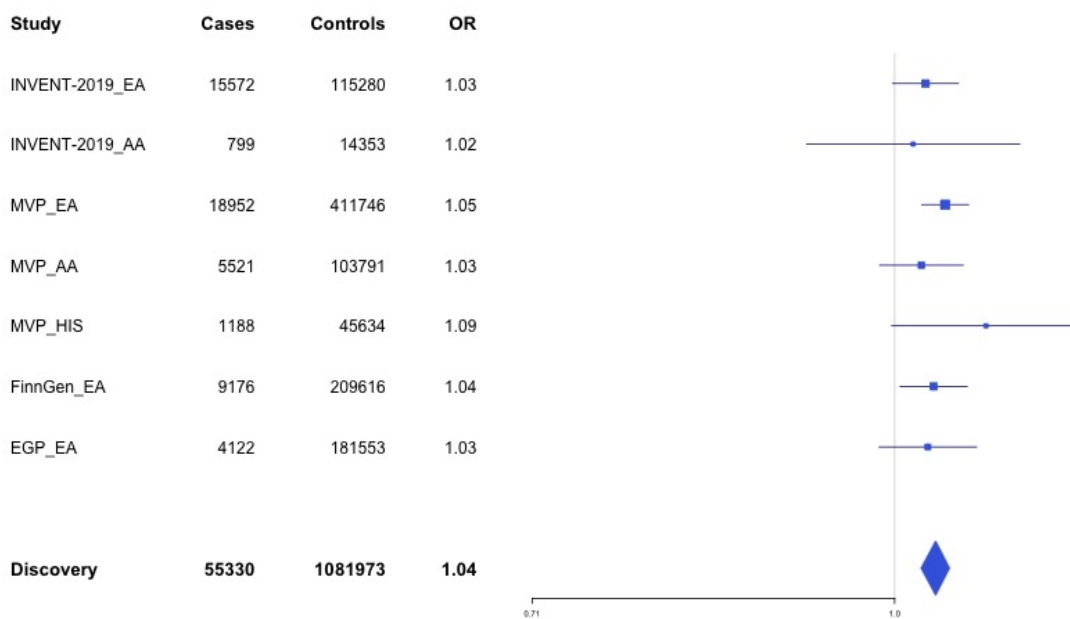



Supplementary Figure 1.13 – rs13084580 (chr3:39188182) in locus 24 (CSRNP1)

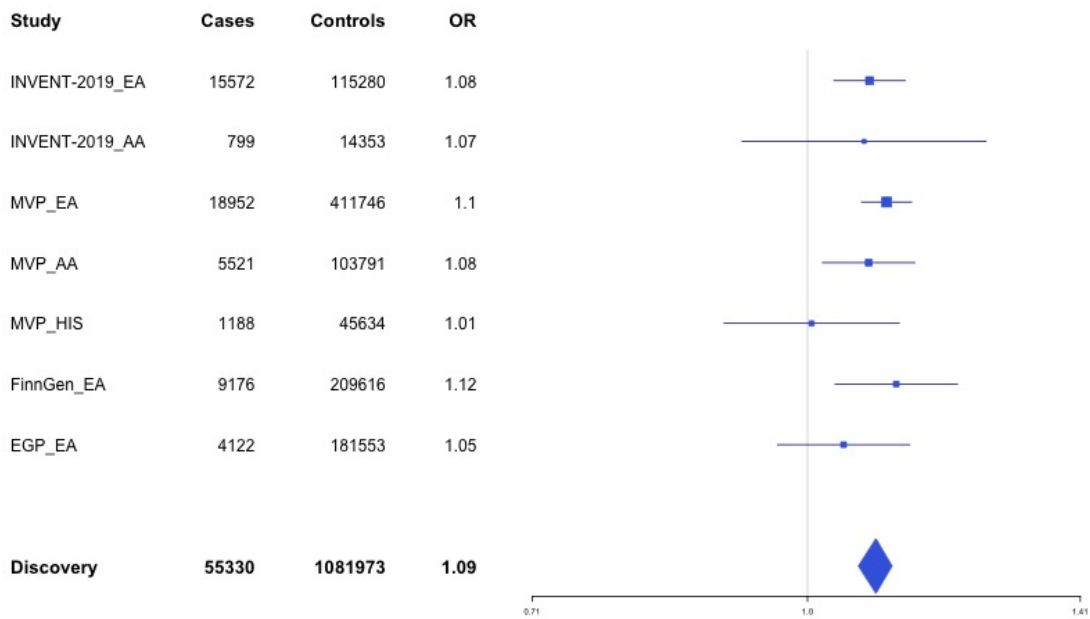

Supplementary Figure 1.14 – rs11130326 (chr3:52771920) in locus 25 (NEK4)

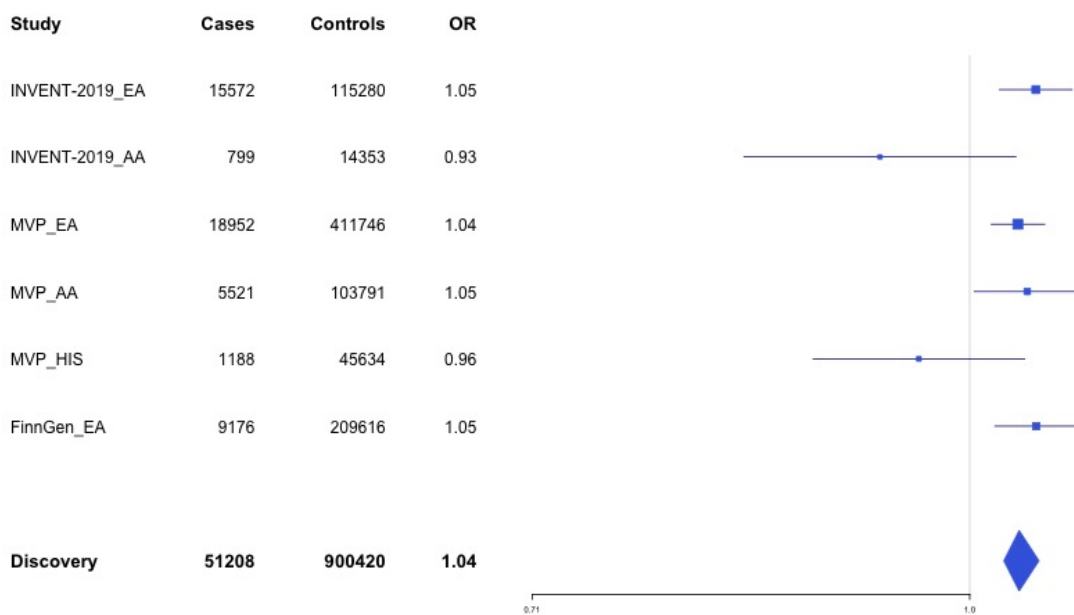

Supplementary Figure 1.15 – rs562281690 (chr3:90177913) in locus 26 (EPHA3;NONE)

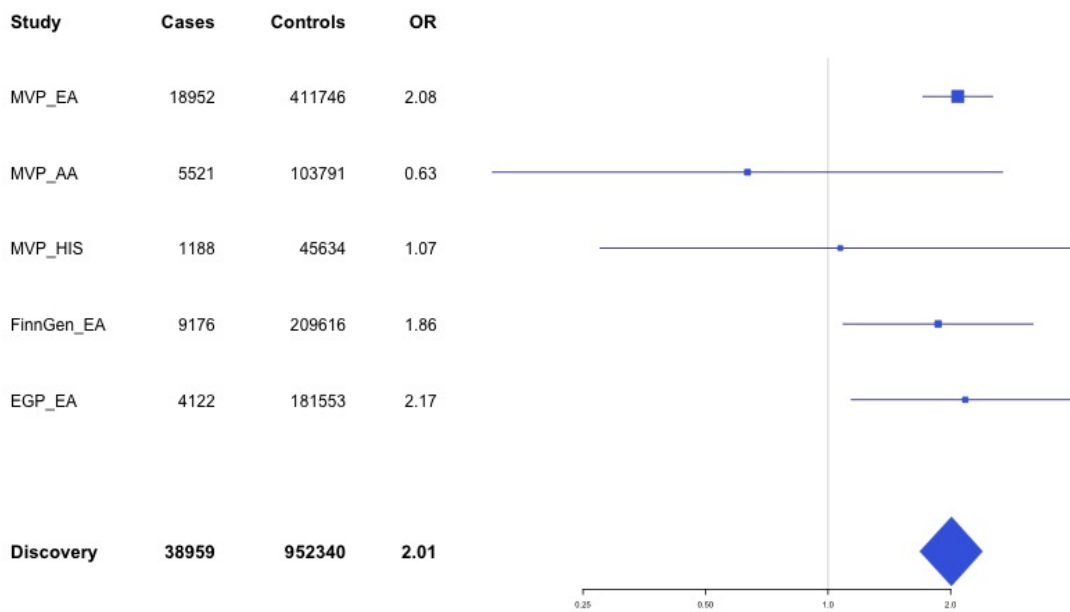

Supplementary Figure 1.16 – rs79324379 (chr3:93712671) in locus 27 (ARL13B)

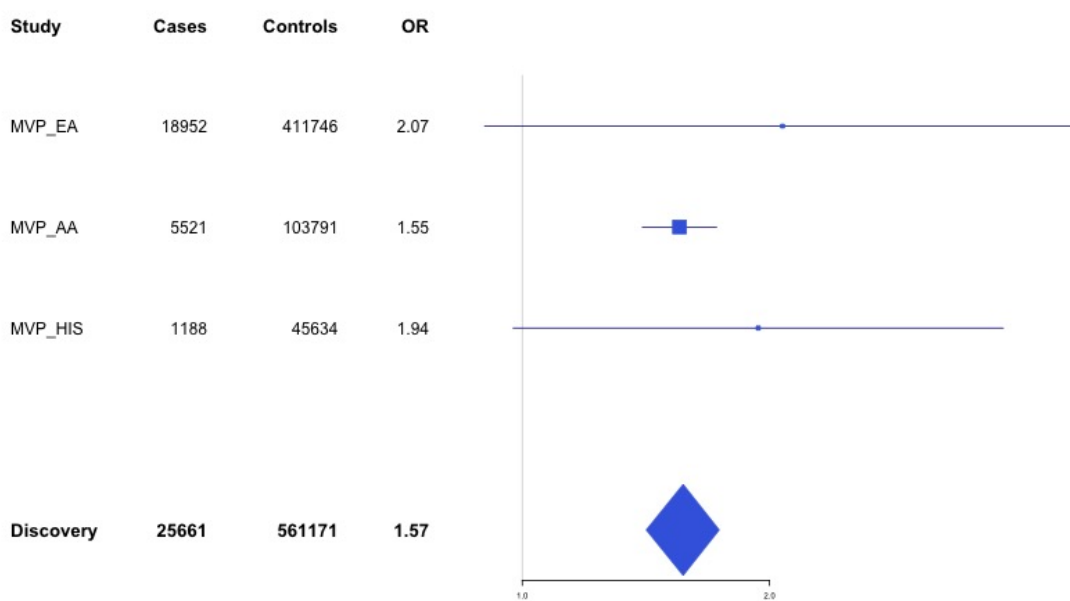

Supplementary Figure 1.17 – rs9872572 (chr3:123108613) in locus 28 (ADCY5)

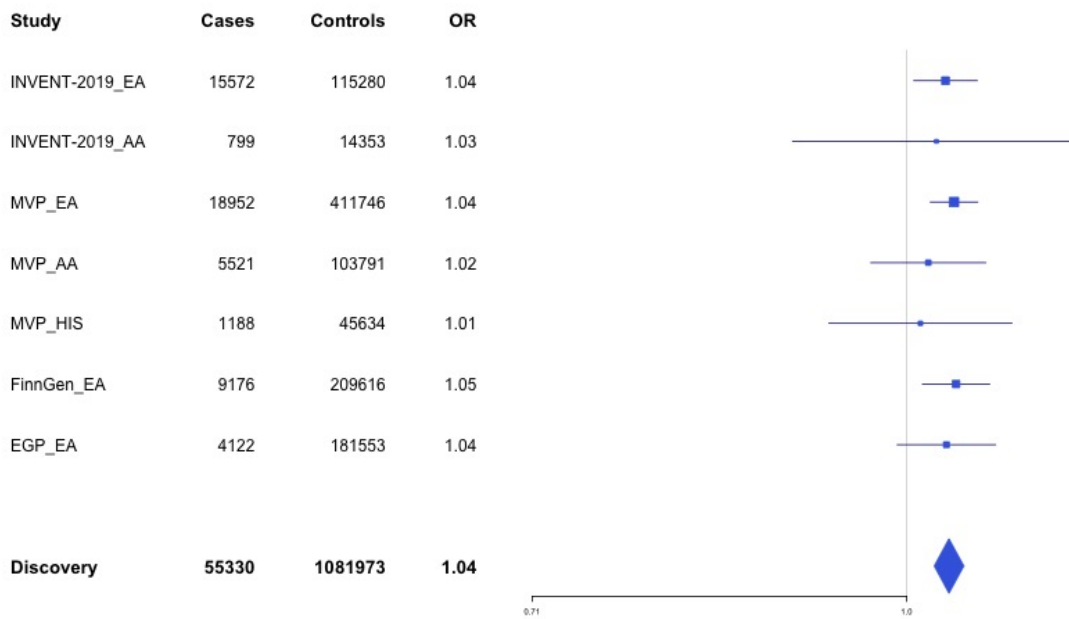

Supplementary Figure 1.18 – rs62282204 (chr3:138584405) in locus 29 (PIK3CB;LINC01391)

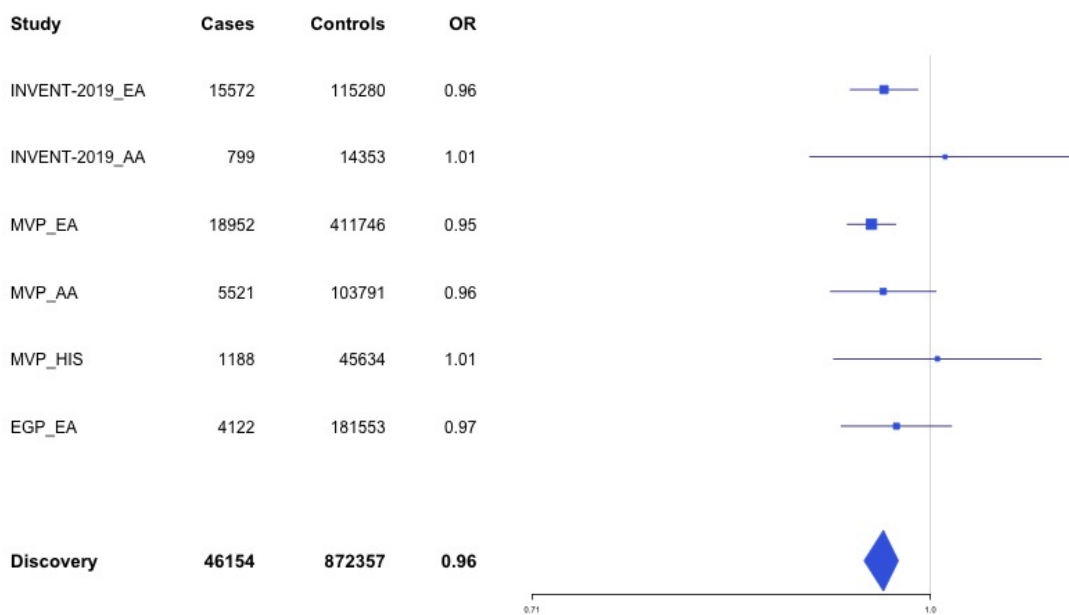

Supplementary Figure 1.19 – rs7613621 (chr3:169191186) in locus 31 (MECOM)

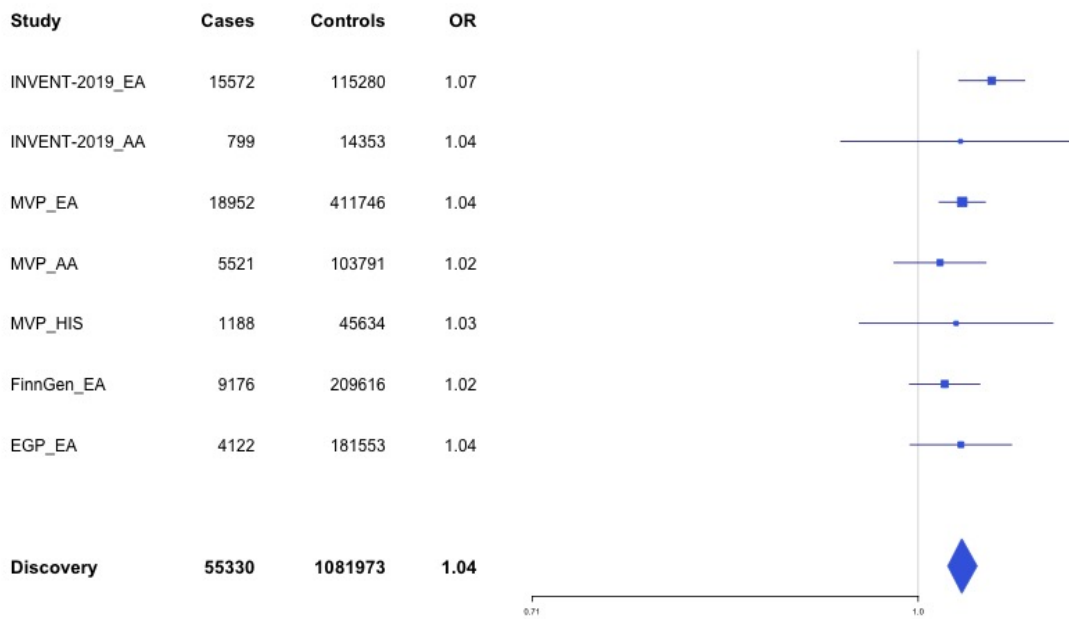

Supplementary Figure 1.20 – rs710446 (chr3:186459927) in locus 32 (KNG1)

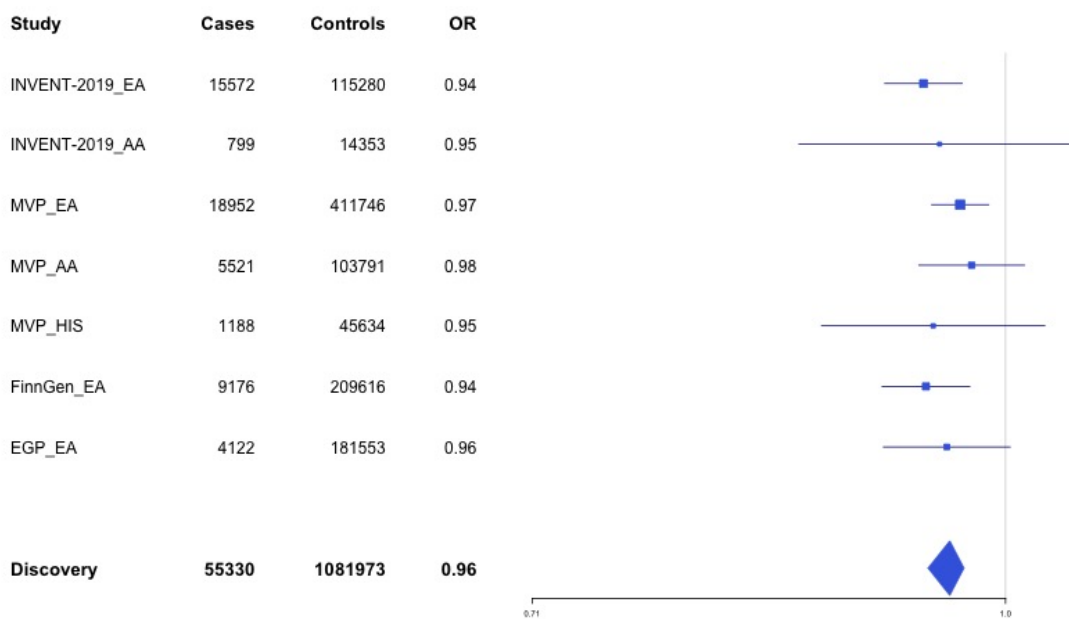

Supplementary Figure 1.21 – rs6797948 (chr3:194784705) in locus 33 (LINC01968;XXYLT1)

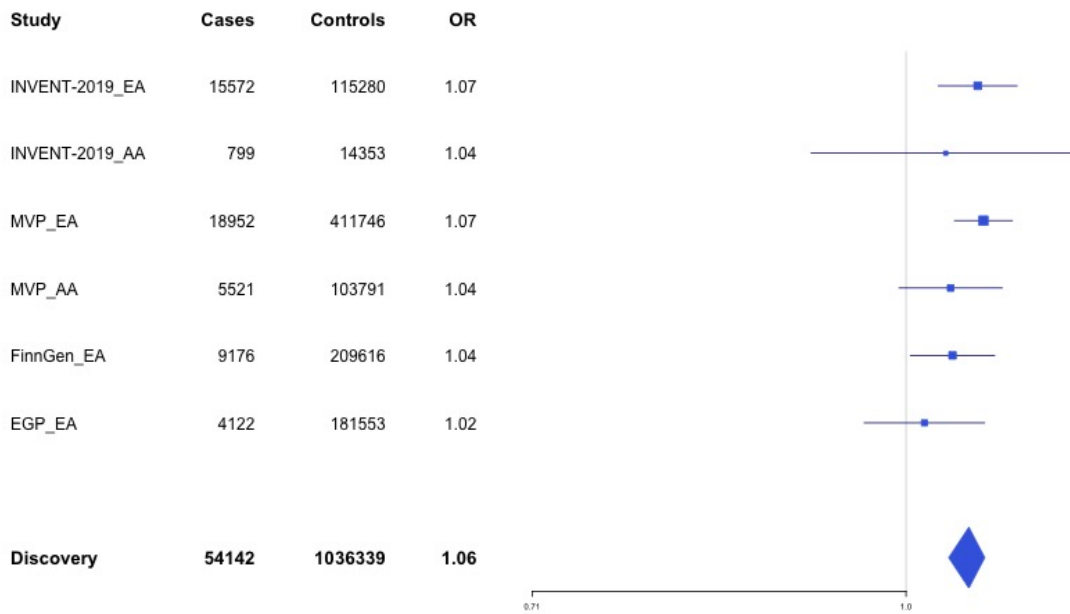

Supplementary Figure 1.22 – rs6826579 (chr4:83785031) in locus 36 (SEC31A)

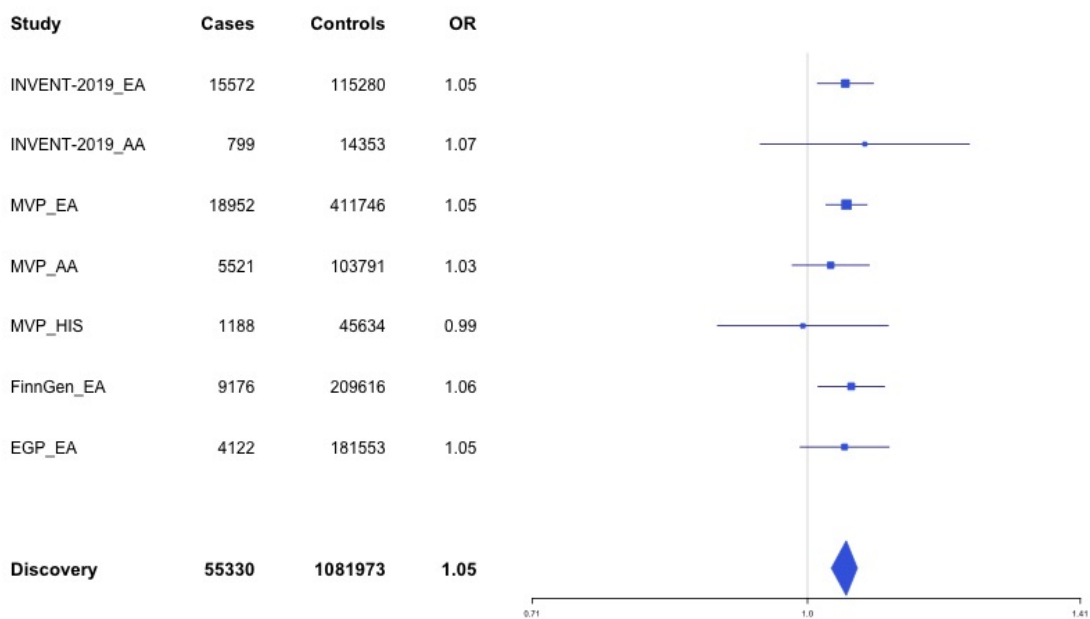

Supplementary Figure 1.23 – rs17010957 (chr4:86719165) in locus 37 (ARHGAP24)

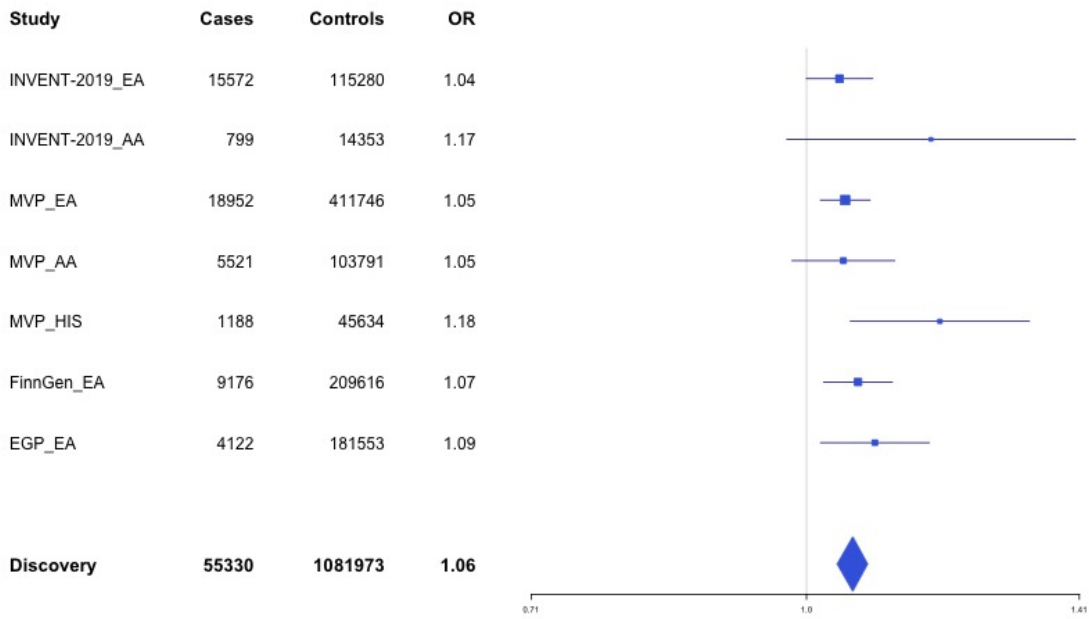

Supplementary Figure 1.24 – rs2066864 (chr4:155525695) in locus 39 (FGG)

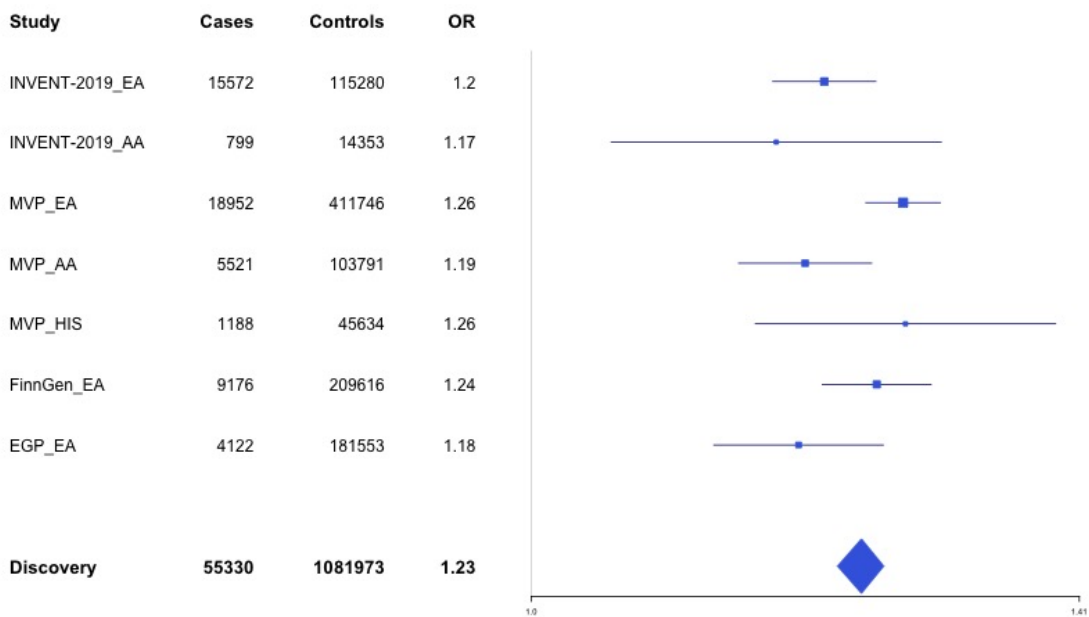

Supplementary Figure 1.25 – rs3756011 (chr4:187206249) in locus 40 (F11)

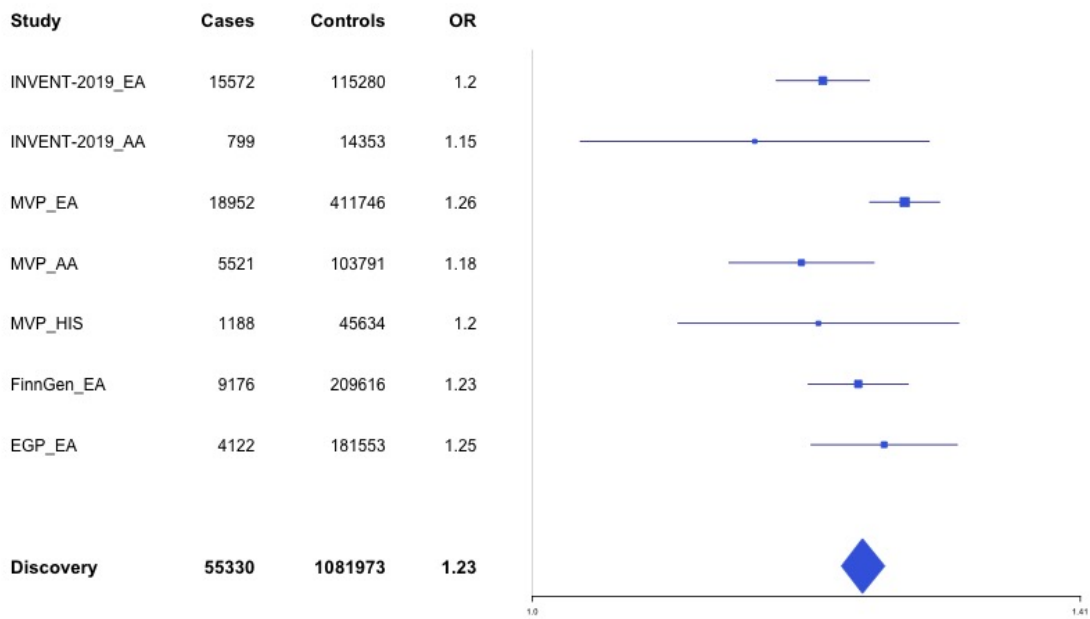

Supplementary Figure 1.26 – rs16867574 (chr5:38708554) in locus 42 (OSMR-AS1)

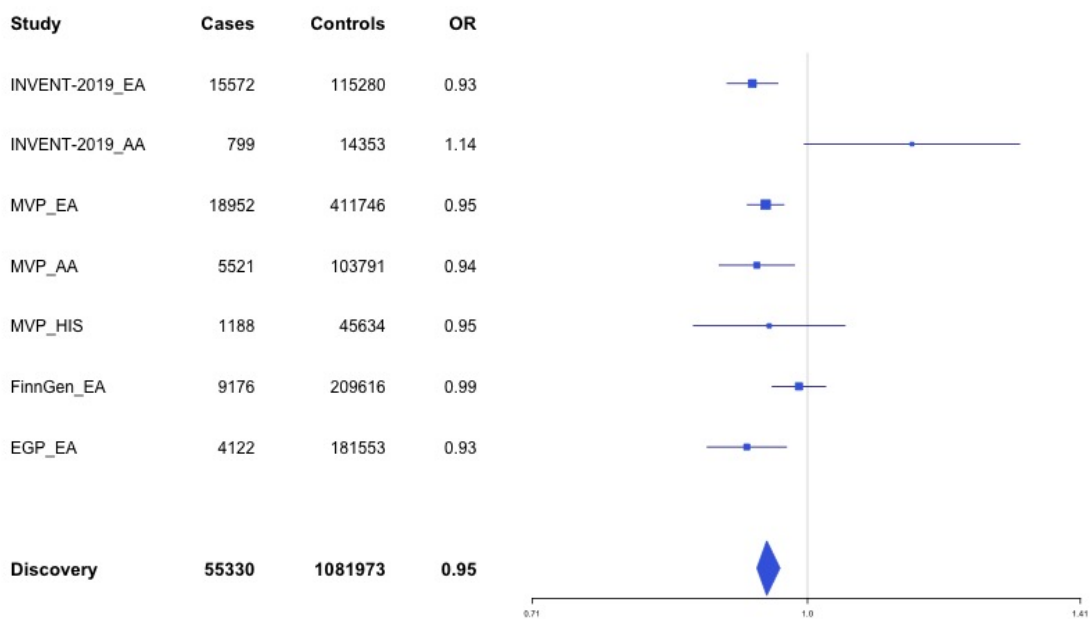

Supplementary Figure 1.27 – rs38032 (chr5:96321887) in locus 44 (LNPEP)

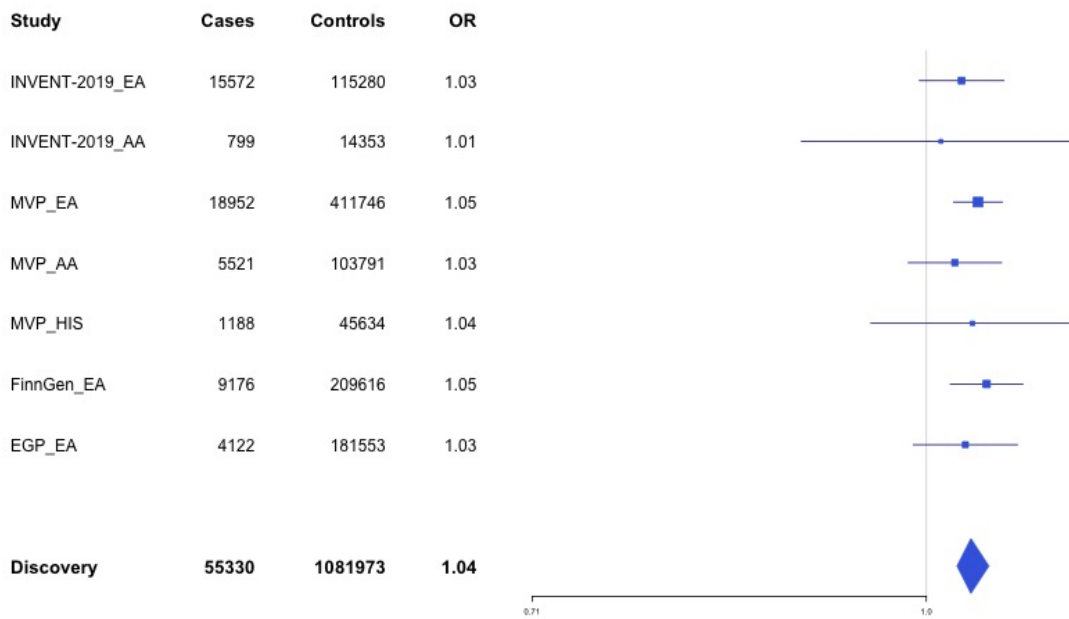

Supplementary Figure 1.28 – rs9268881 (chr6:32431606) in locus 48 (HLA-DRA ;HLA-DRB5)

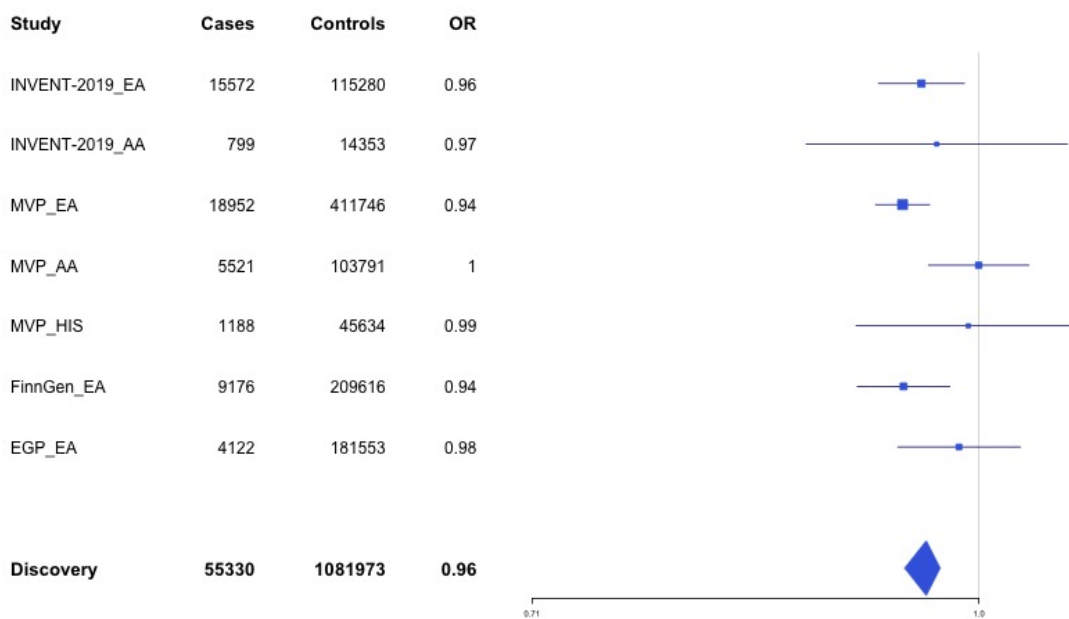



Supplementary Figure 1.29 – rs145294670 (chr6:34622561) in locus 49 (ILRUN)

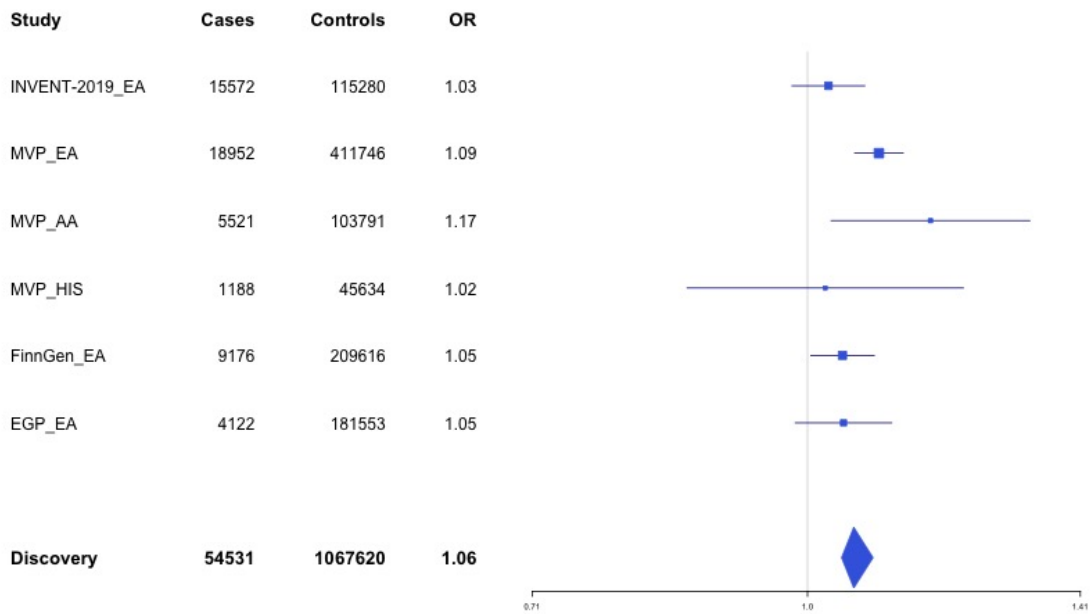

Supplementary Figure 1.30 – rs903646797 (chr6:40985346) in locus 50 (LOC101929555)

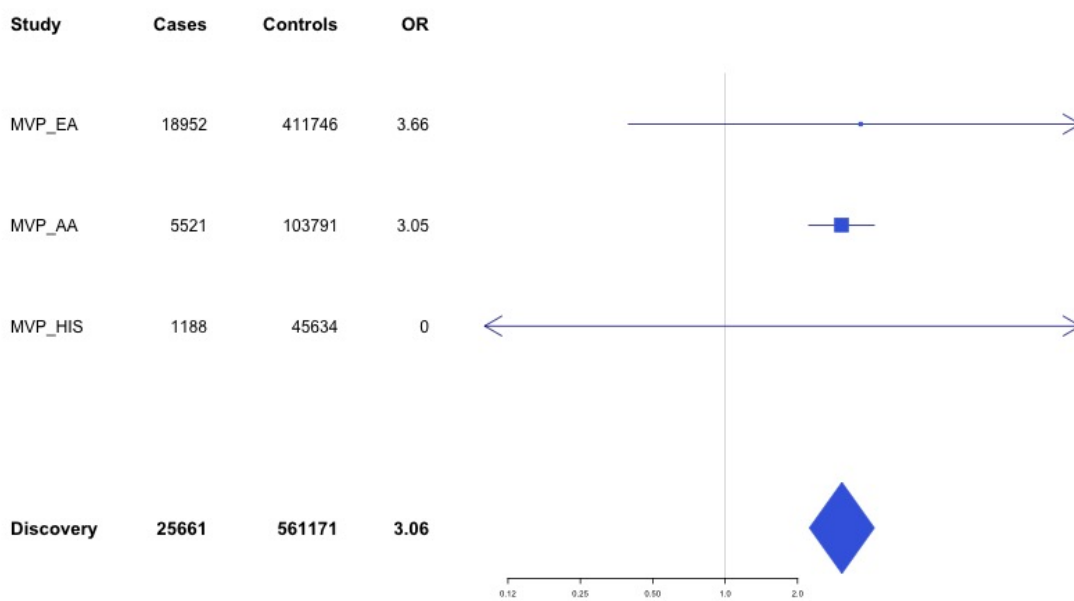

Supplementary Figure 1.31 – rs9390460 (chr6:147694334) in locus 52 (STXBP5)

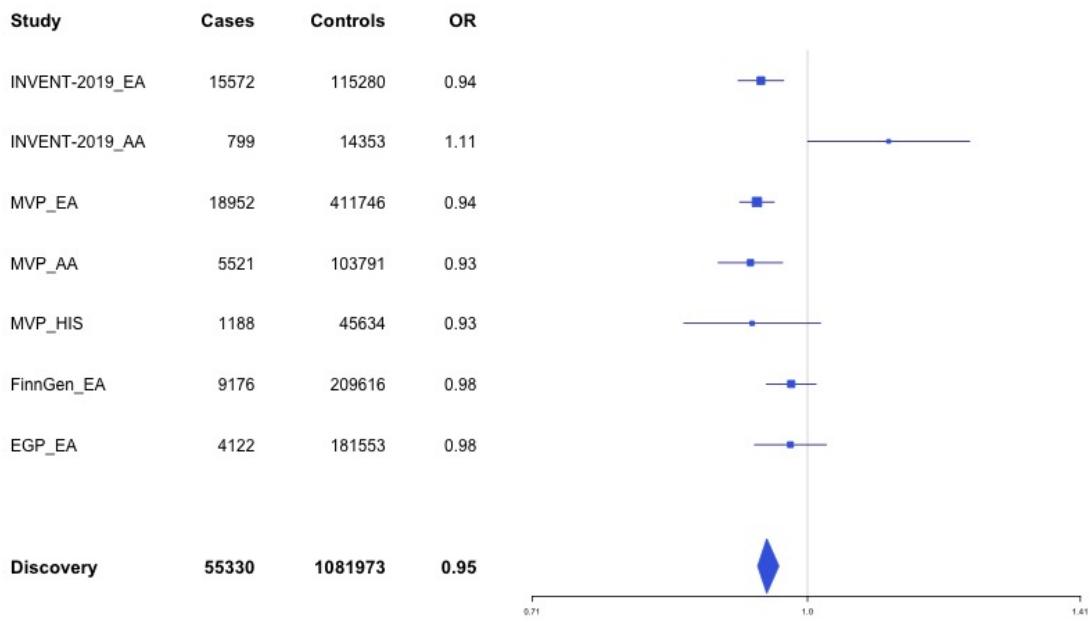

Supplementary Figure 1.32 – rs42036 (chr7:92241451) in locus 54 (CDK6)

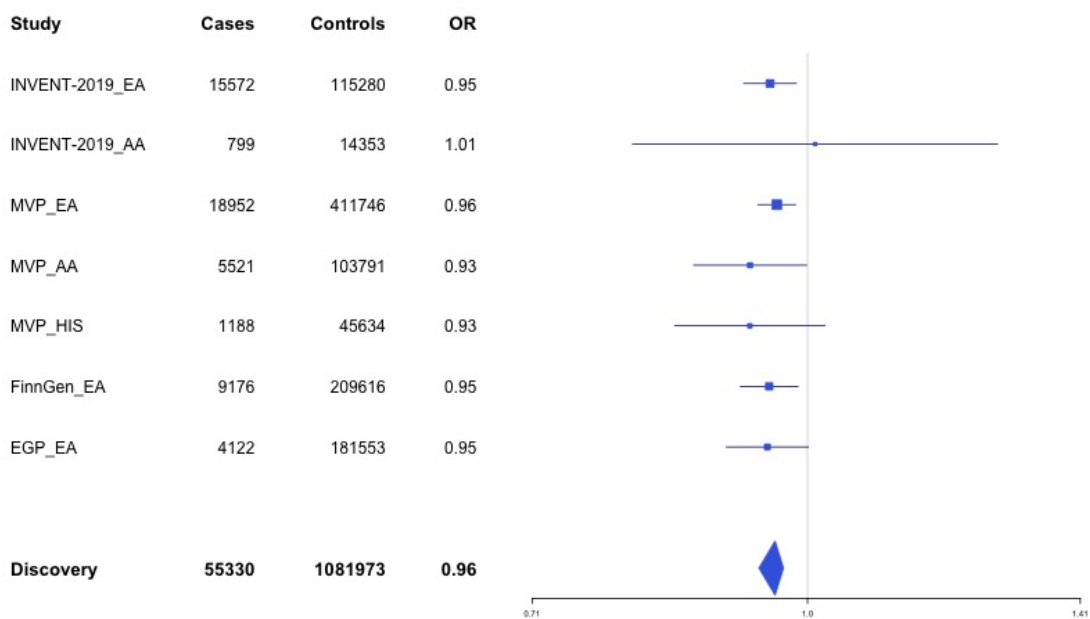

Supplementary Figure 1.33 – rs538161377 (chr8:4206326) in locus 55 (CSMD1)

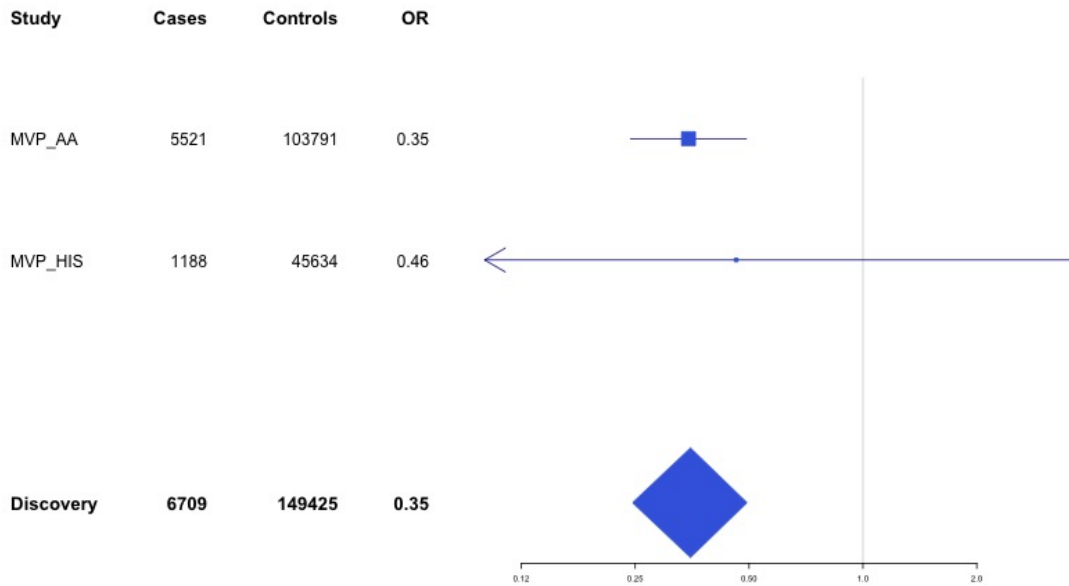

Supplementary Figure 1.34 – rs67694436 (chr8:6654220) in locus 56 (AGPAT5;XKR5)

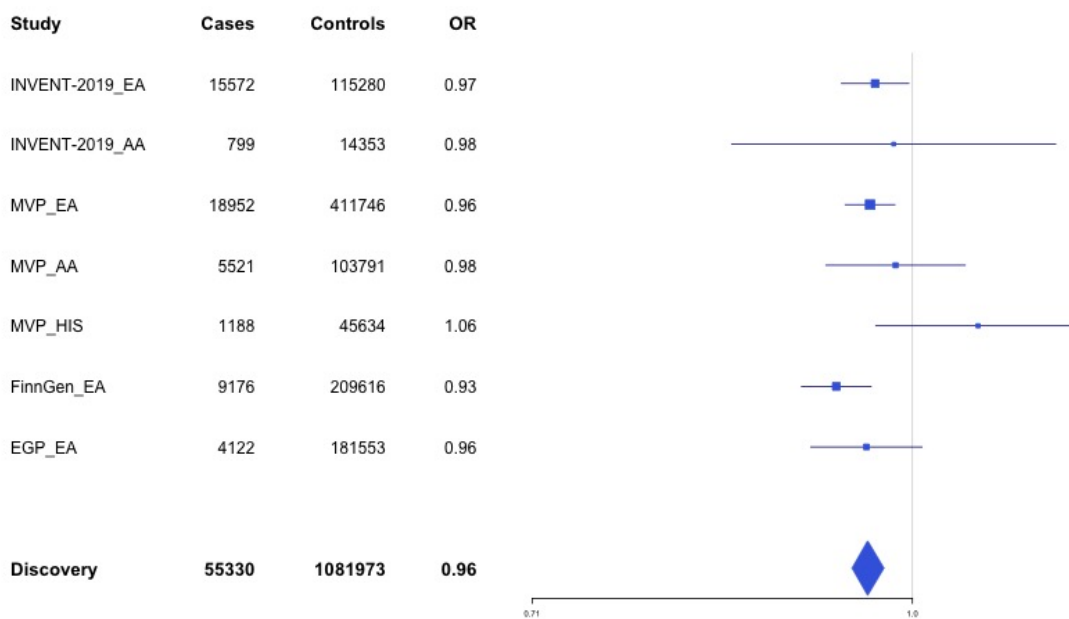

Supplementary Figure 1.35 – rs7010926 (chr8:10626791) in locus 58 (PINX1)

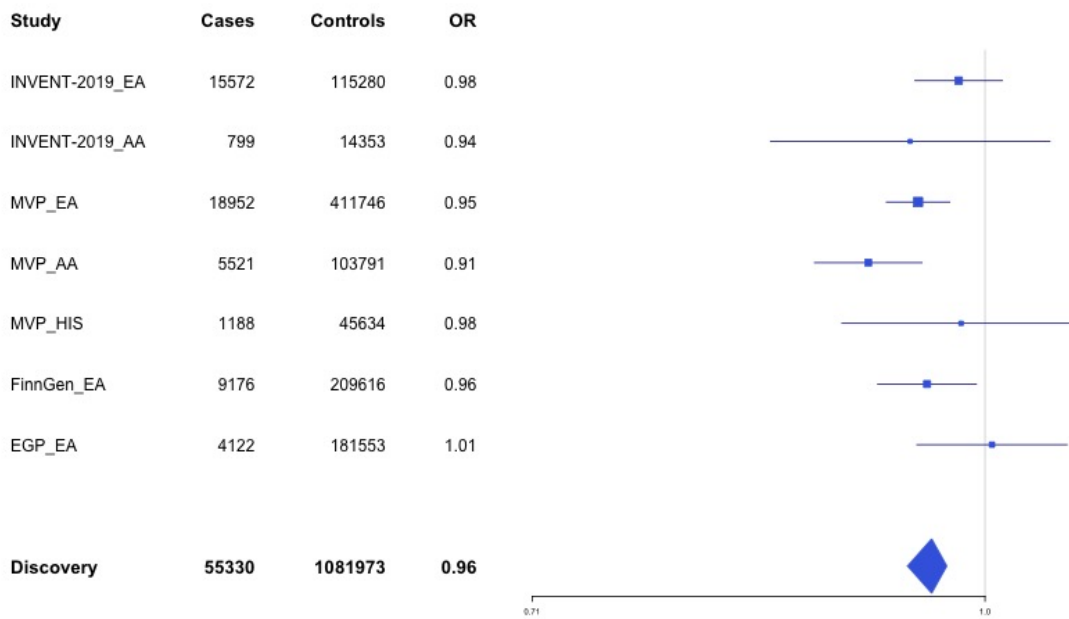

Supplementary Figure 1.36 – rs2685417 (chr8:27807434) in locus 60 (SCARA5)

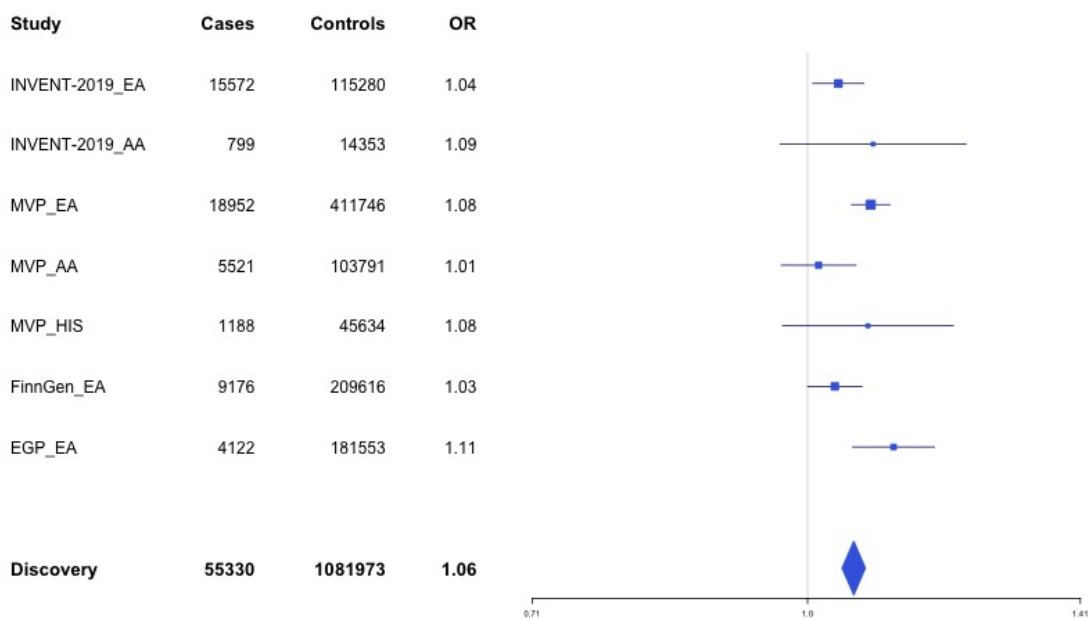

Supplementary Figure 1.37 – rs6993770 (chr8:106581528) in locus 62 (ZFPM2)

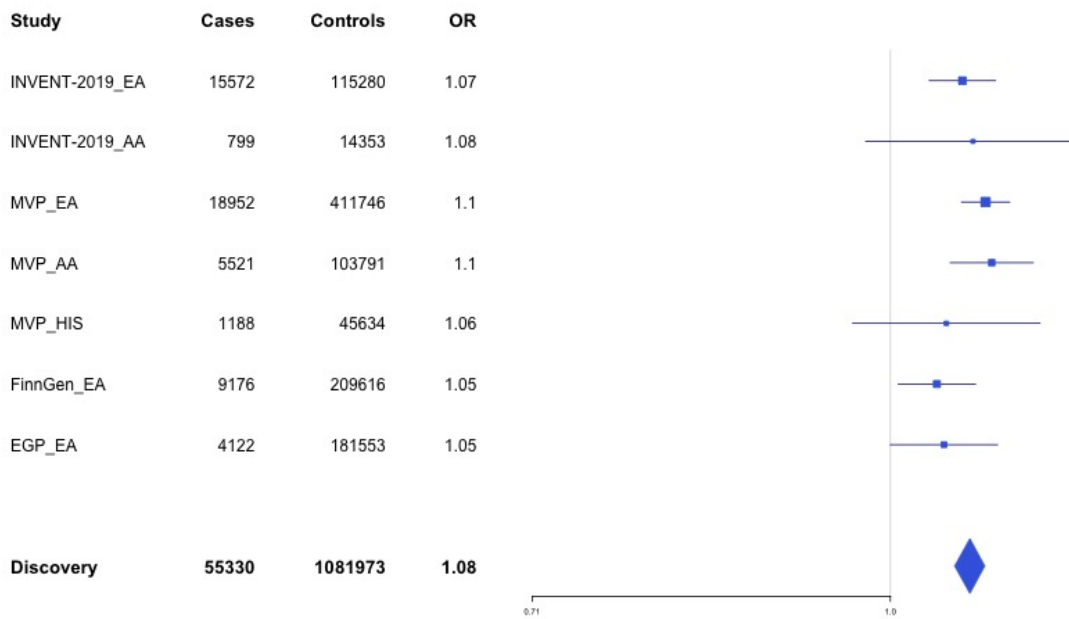

Supplementary Figure 1.38 – rs77375493 (chr9:5073770) in locus 64 (JAK2)

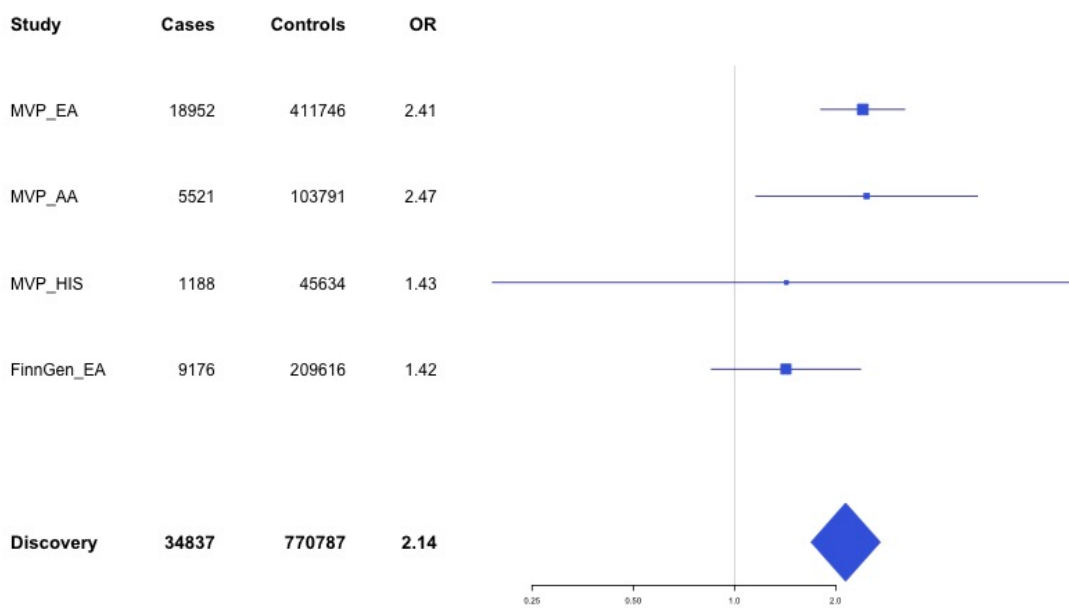

Supplementary Figure 1.39 – rs35208412 (chr9:99194509) in locus 65 (ZNF367;HABP4)

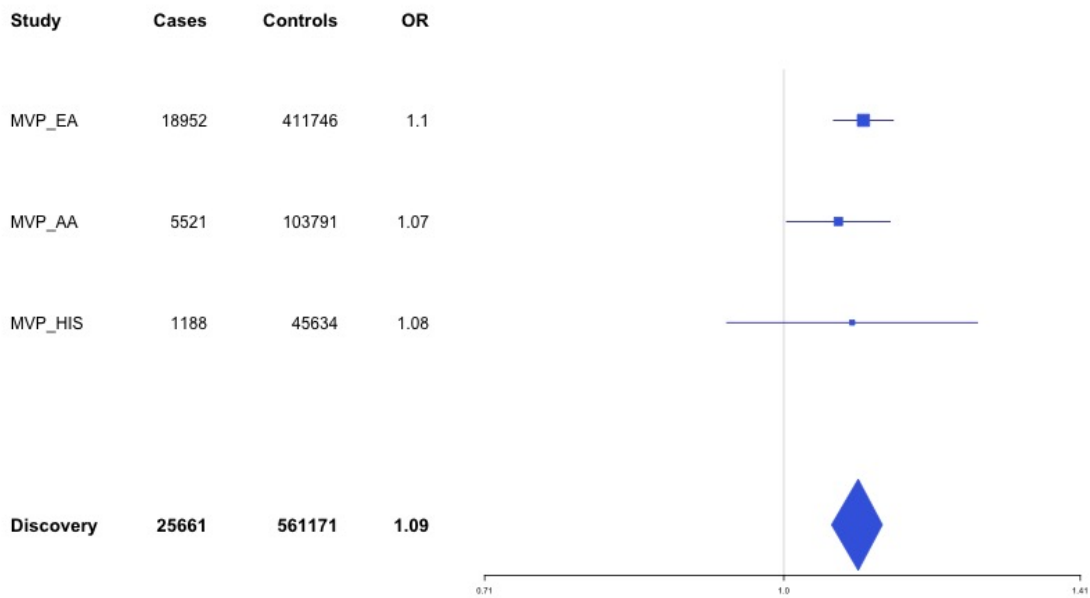

Supplementary Figure 1.40 – rs505922 (chr9:136149229) in locus 66 (ABO)

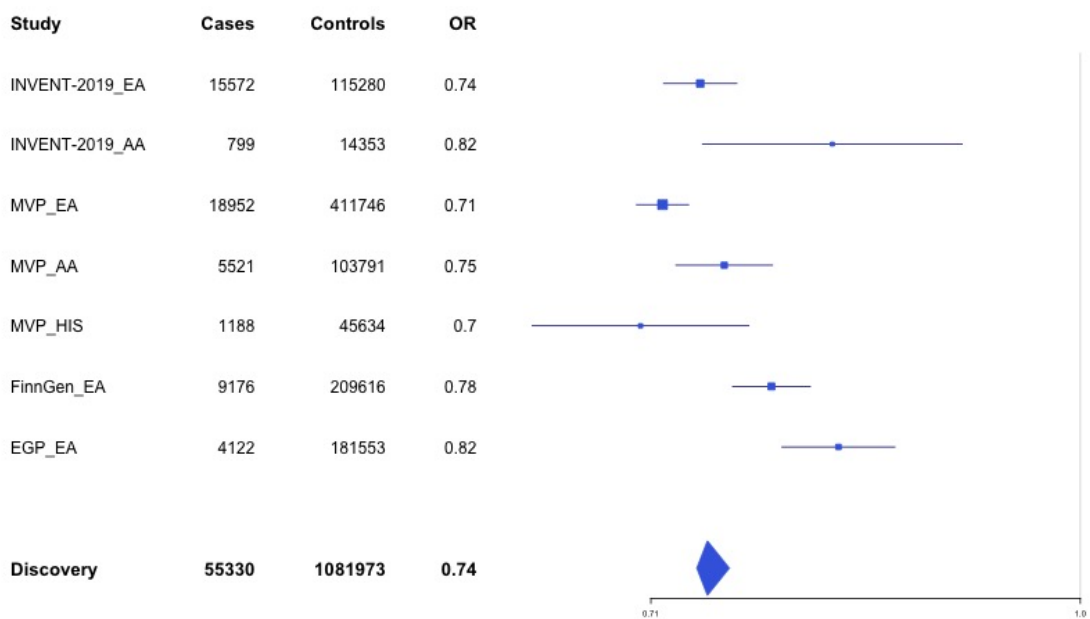

Supplementary Figure 1.41 – rs1887091 (chr10:14535113) in locus 67 (MIR1265 ;FAM107B)

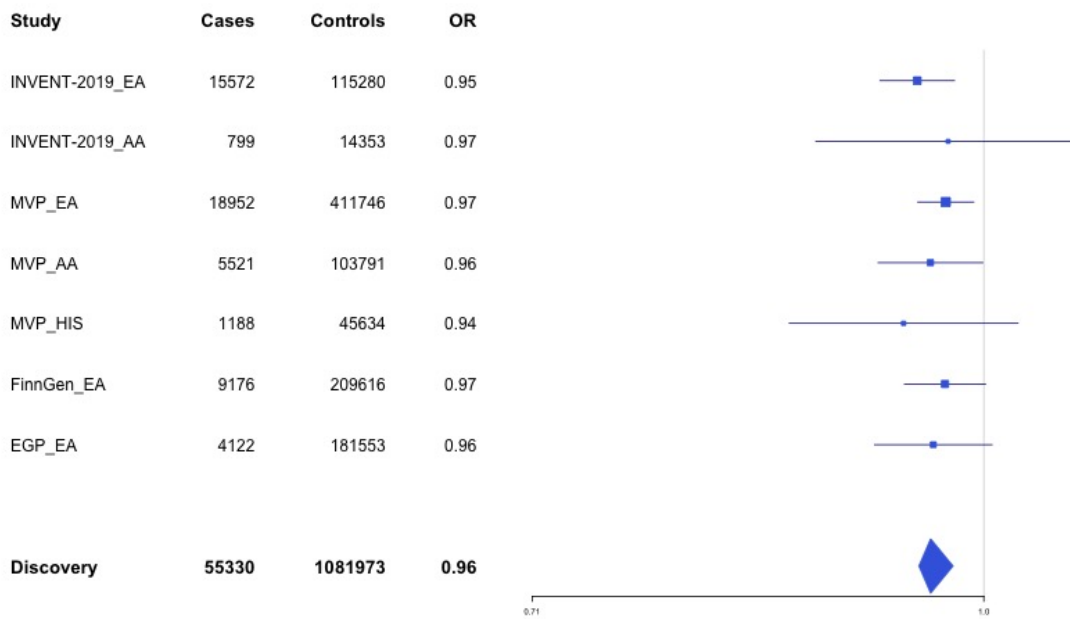

Supplementary Figure 1.42 – rs529892067 (chr10:43568540) in locus 71 (MIR5100 ;RET)

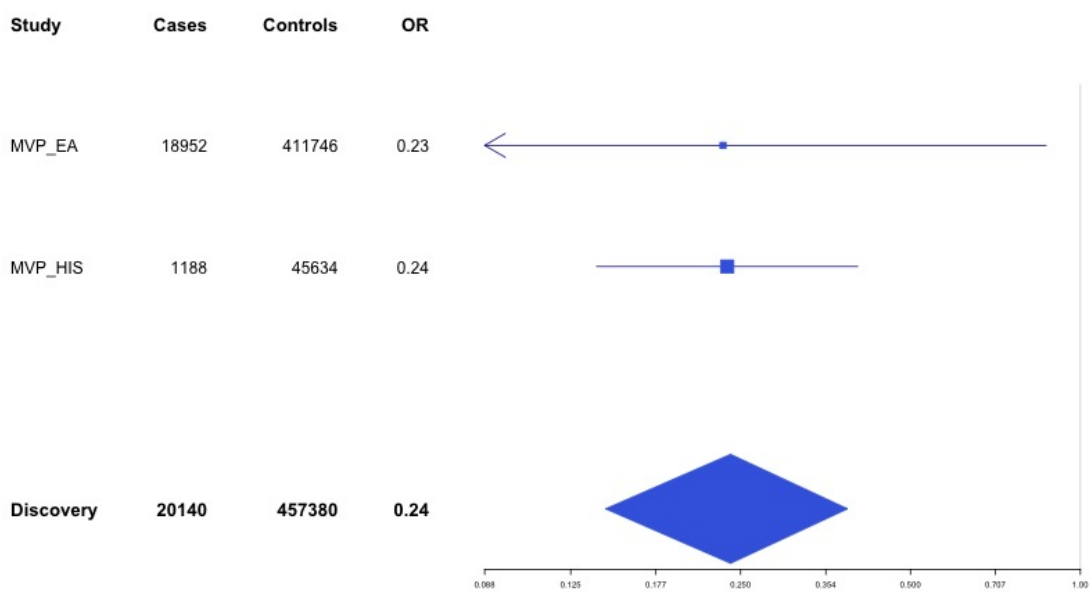

Supplementary Figure 1.43 – rs17490626 (chr10:71218646) in locus 72 (TSPAN15)

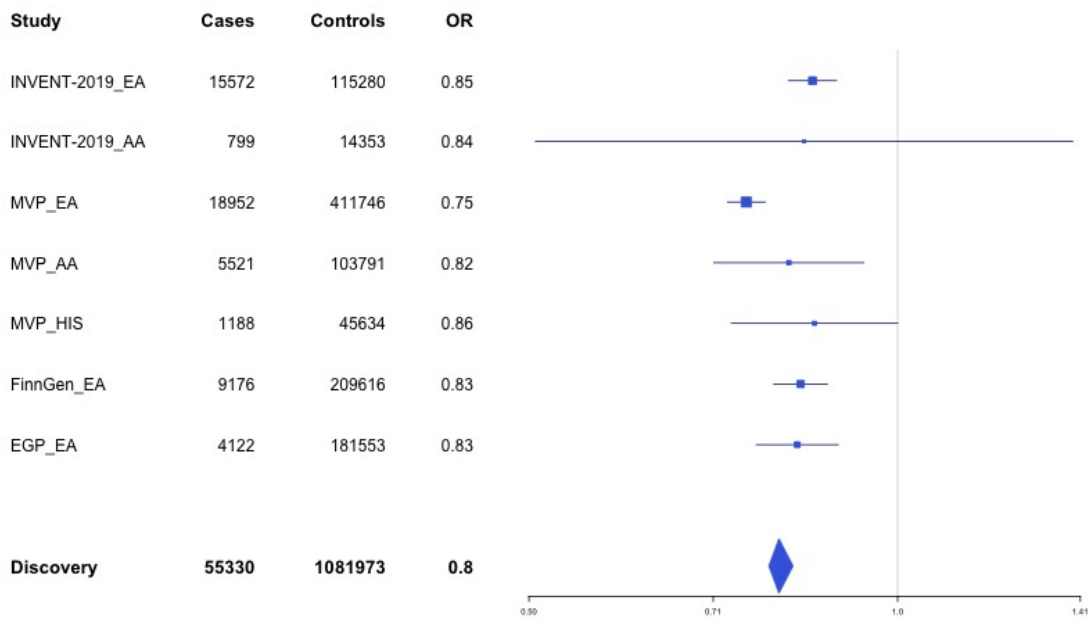

Supplementary Figure 1.44 – rs16937003 (chr10:80938499) in locus 73 (ZMIZ1)

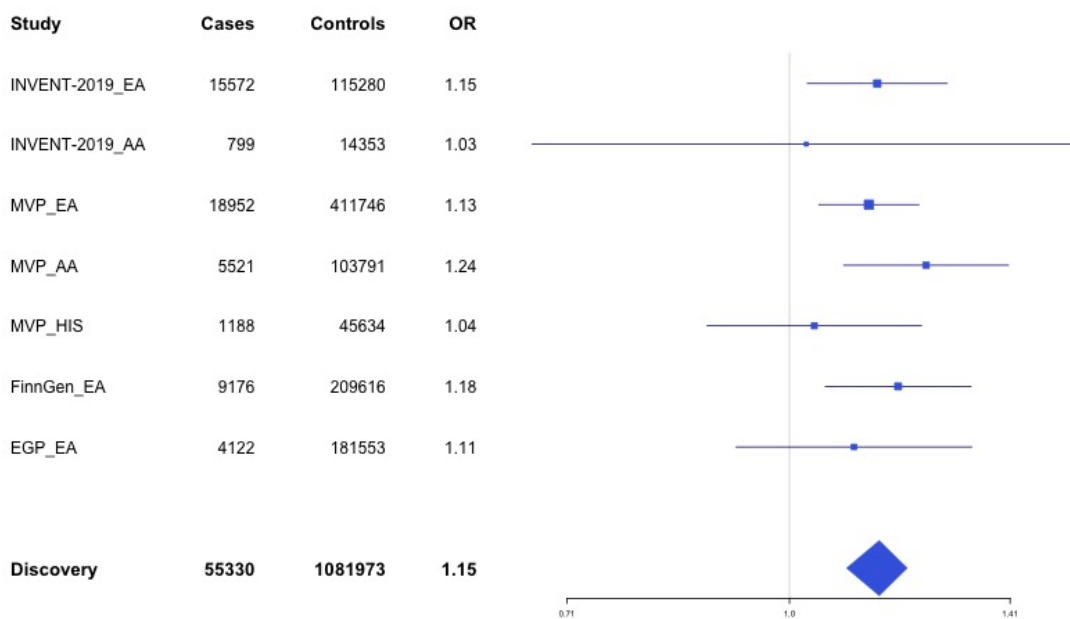



Supplementary Figure 1.45 – rs2274224 (chr10:96039597) in locus 74 (PLCE1)

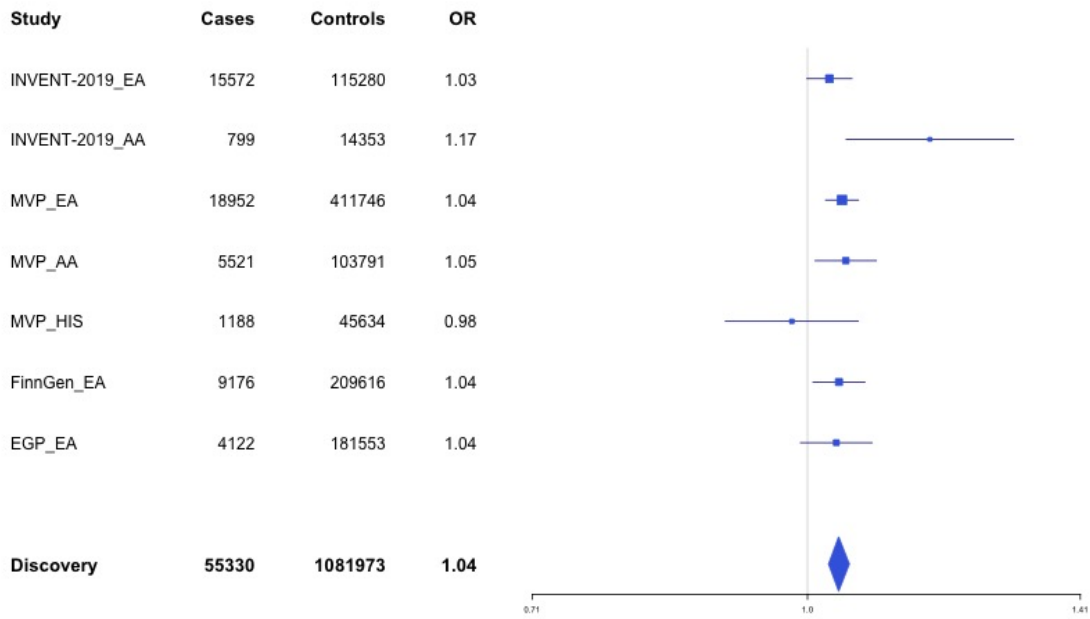

Supplementary Figure 1.46 – rs10886430 (chr10:121010256) in locus 75 (GRK5)

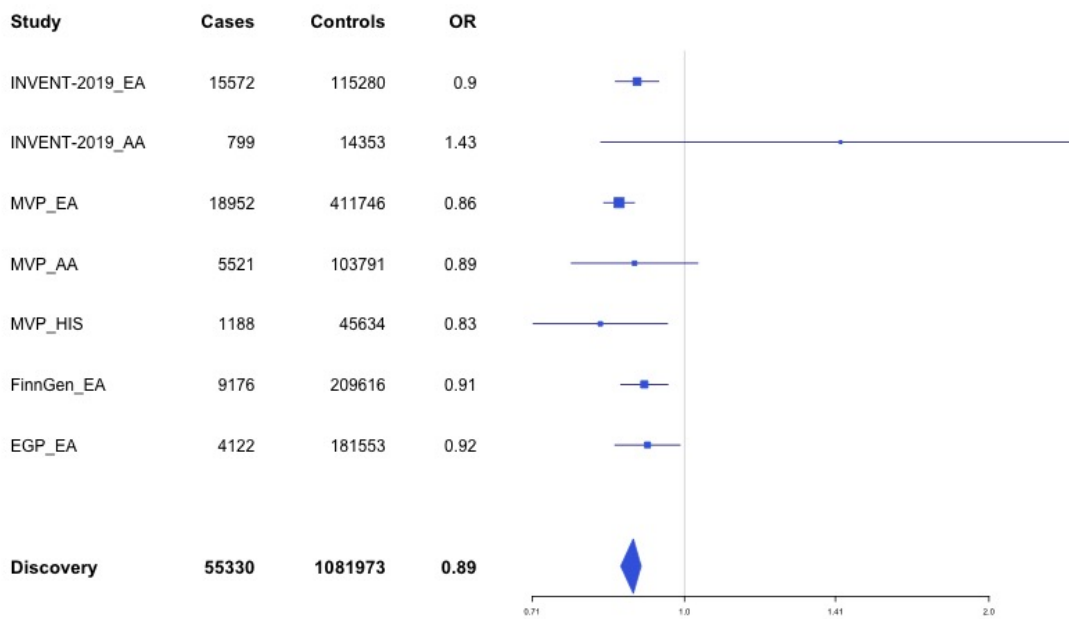

Supplementary Figure 1.47 – rs11032074 (chr11:32993887) in locus 78 (QSER1)

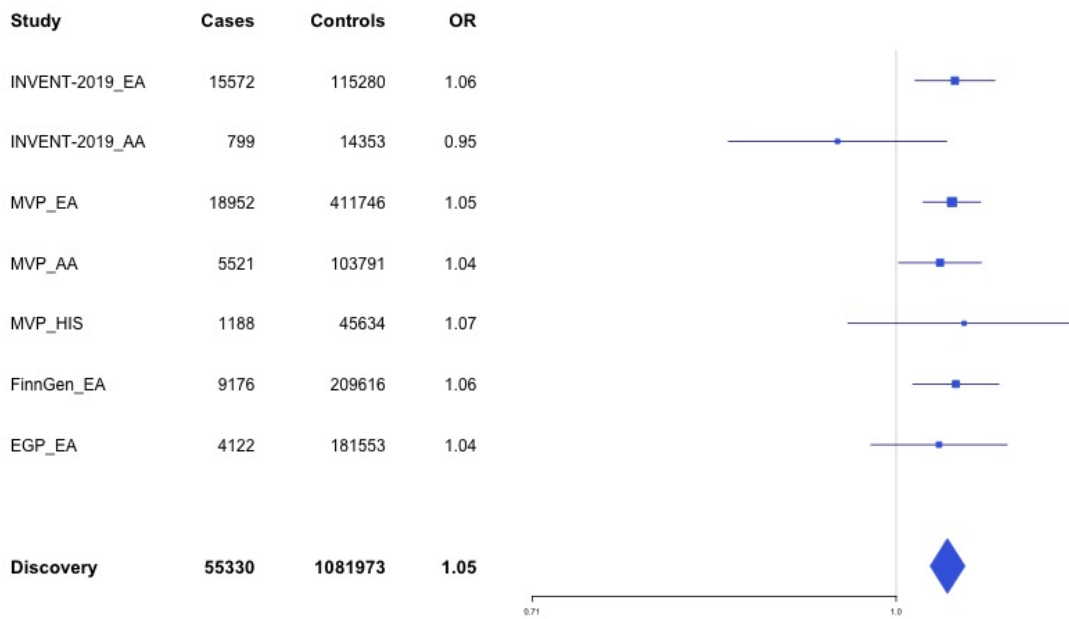

Supplementary Figure 1.48 – rs1799963 (chr11:46761055) in locus 79 (F2)

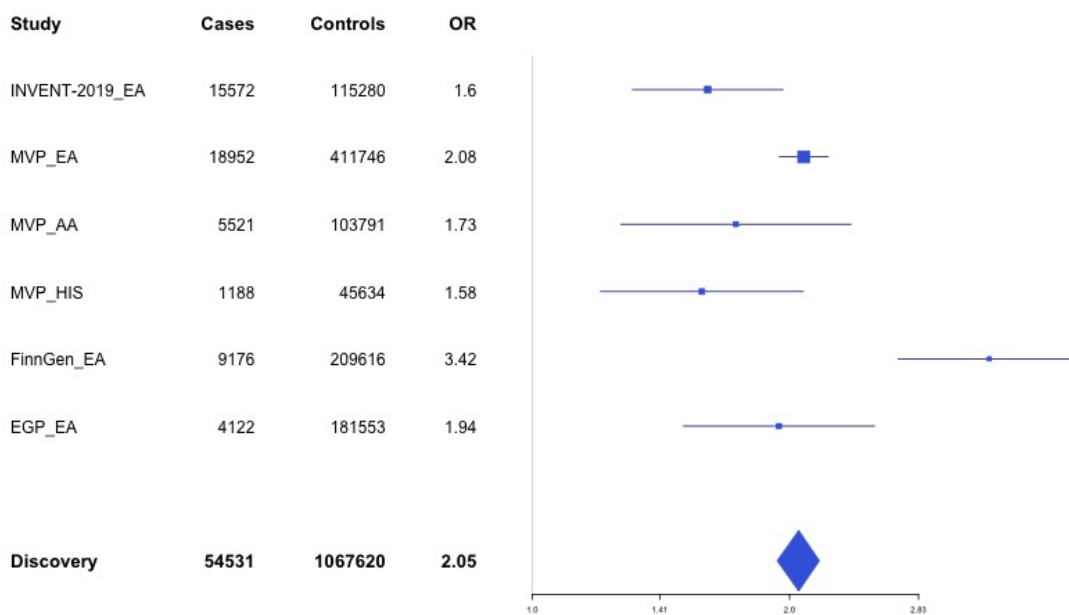

Supplementary Figure 1.49 – rs141687379 (chr11:56666822) in locus 80 (FADS2B)

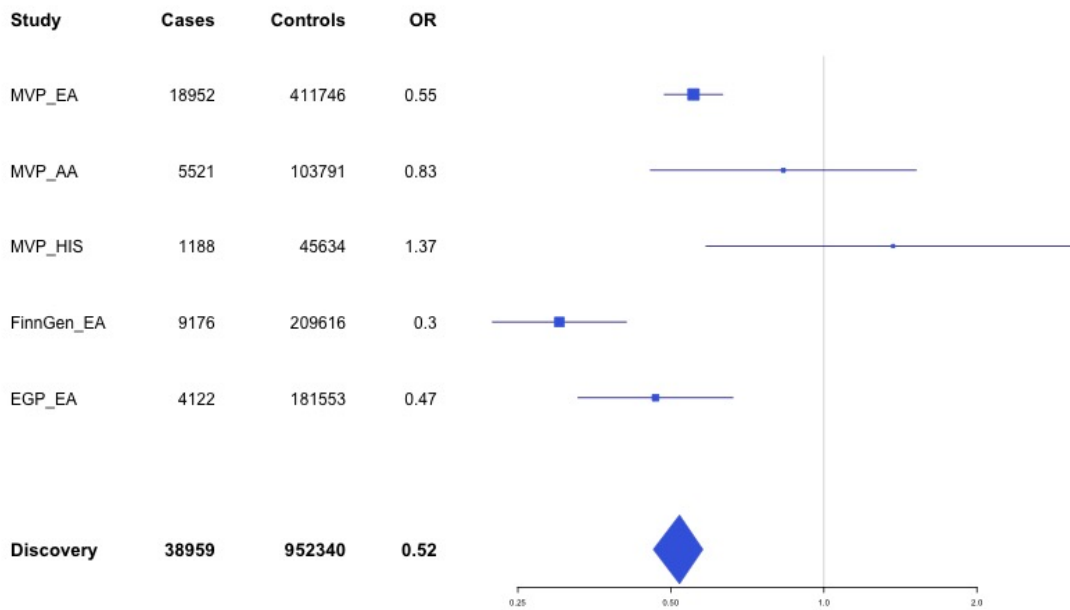

Supplementary Figure 1.50 – rs174551 (chr11:61573684) in locus 82 (FADS1)

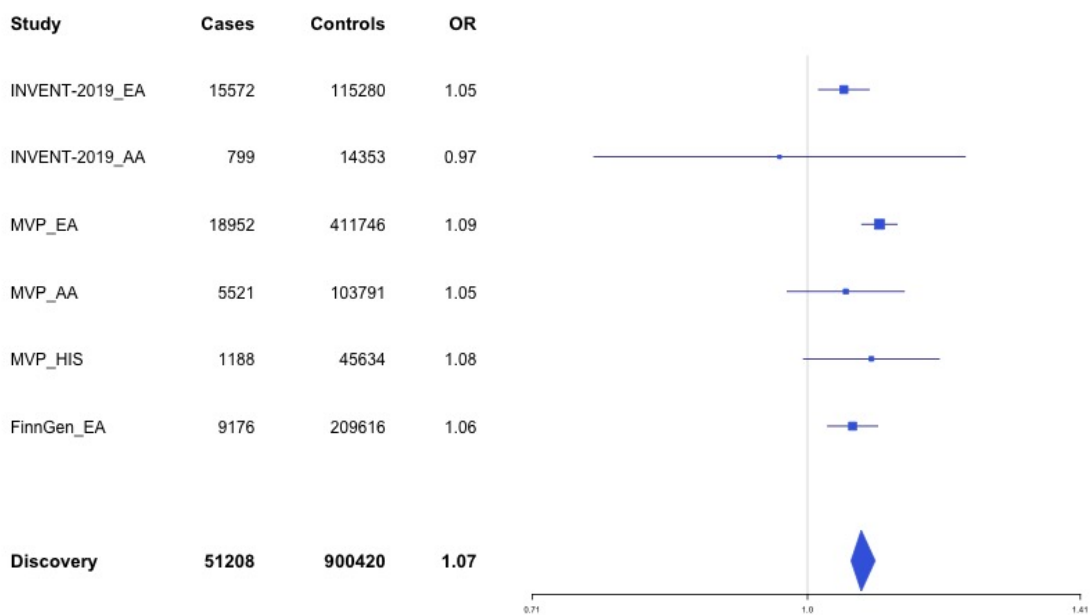

Supplementary Figure 1.51 – rs35257264 (chr11:126296816) in locus 85 (ST3GAL4)

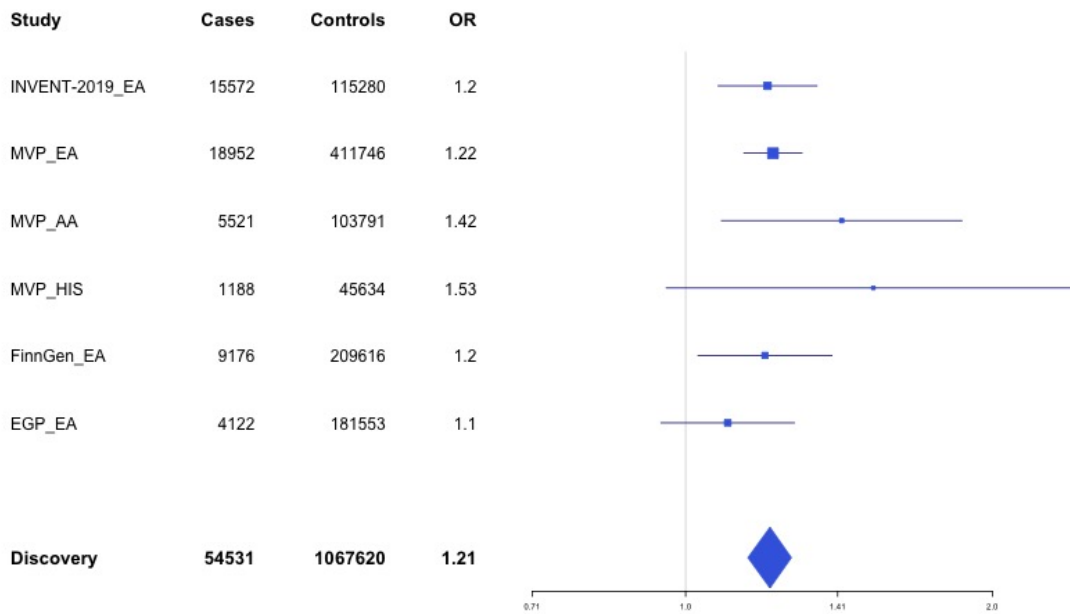

Supplementary Figure 1.52 – rs1558519 (chr12:6153738) in locus 87 (VWF)

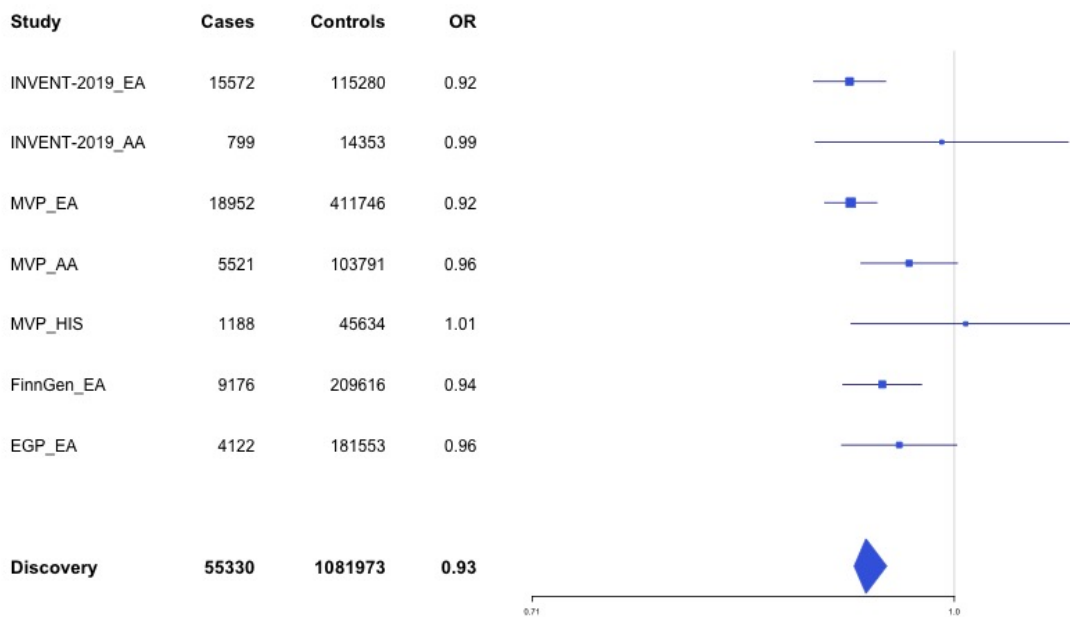

Supplementary Figure 1.53 – rs7311483 (chr12:9053661) in locus 88 (A2ML1 ;PHC1)

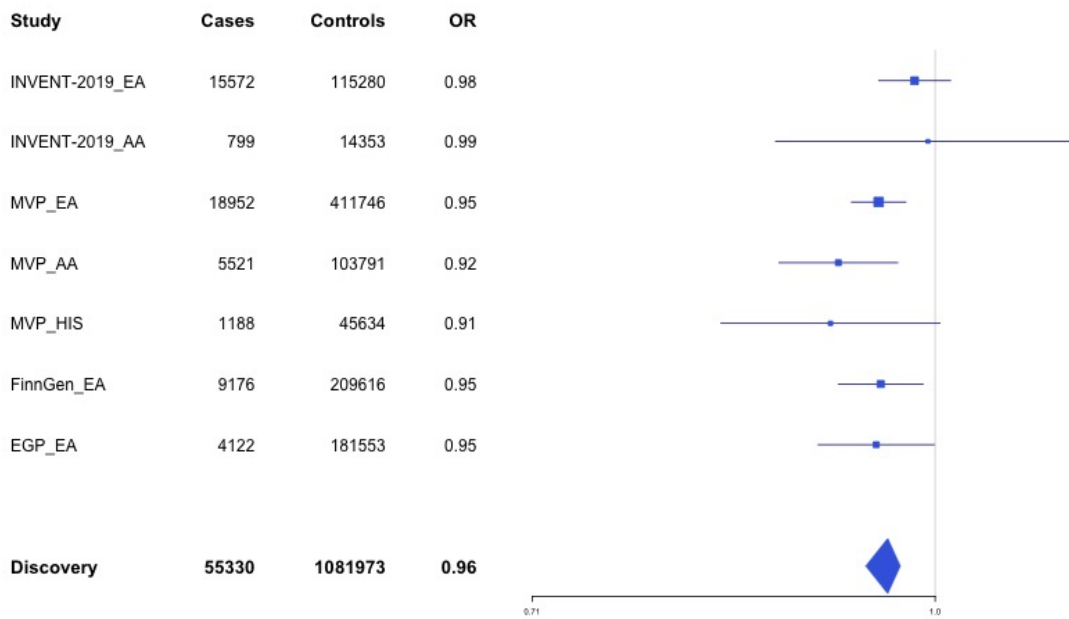

Supplementary Figure 1.54 – rs6580981 (chr12:54723028) in locus 89 (COPZ1)

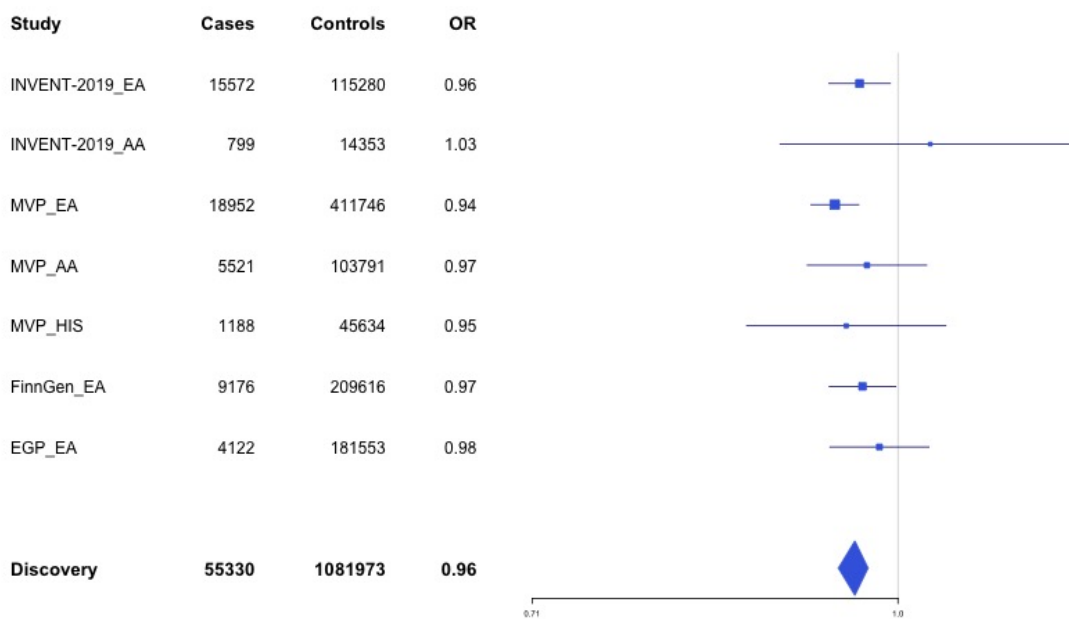

Supplementary Figure 1.55 – rs142351376 (chr12:104136288) in locus 90 (STAB2)

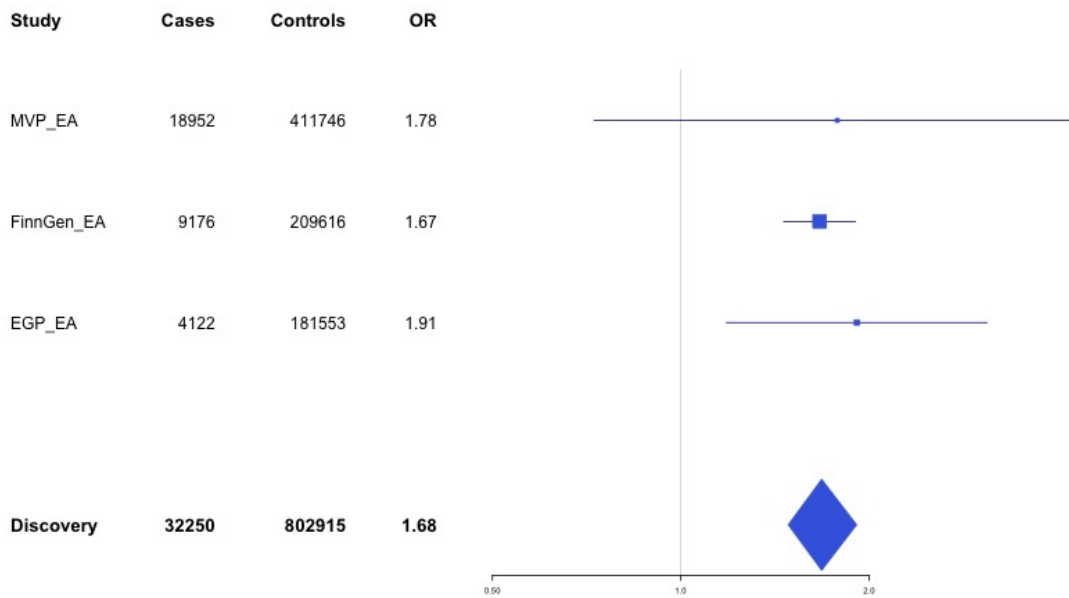

Supplementary Figure 1.56 – rs3184504 (chr12:111884608) in locus 91 (SH2B3)

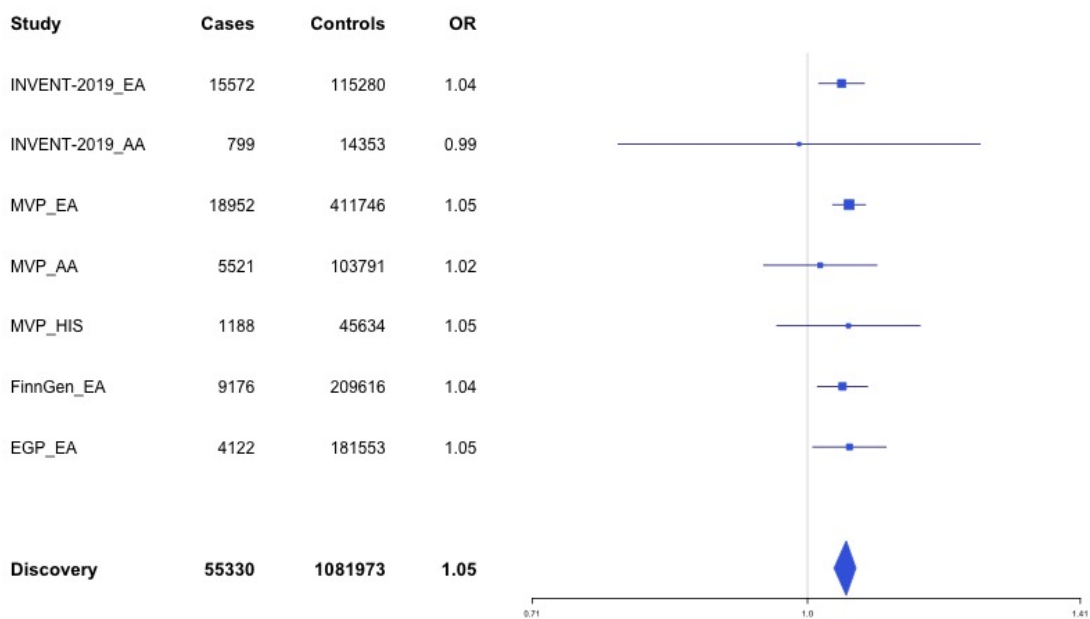

Supplementary Figure 1.57 – rs75940120 (chr13:109686619) in locus 93 (MYO16)

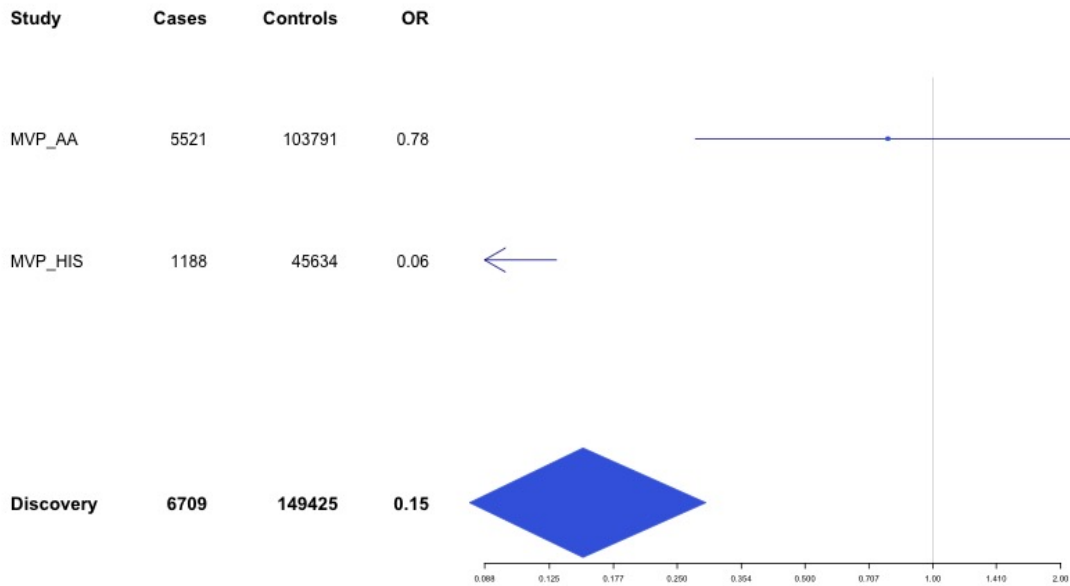

Supplementary Figure 1.58 – rs3211752 (chr13:113787459) in locus 94 (F10)

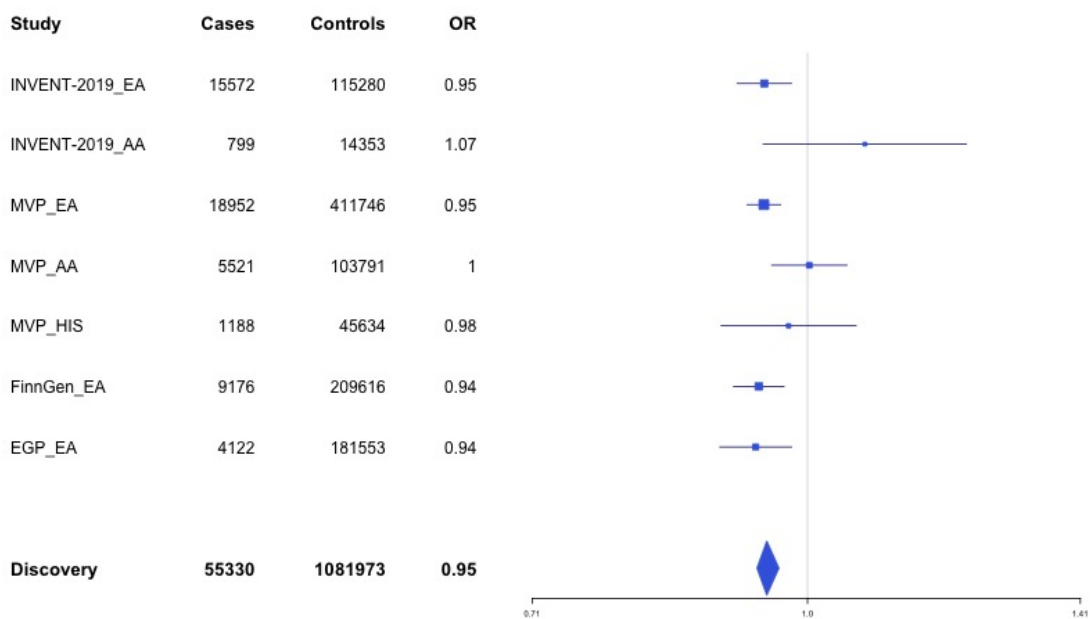

Supplementary Figure 1.59 – rs57035593 (chr14:92268096) in locus 97 (TC2N)

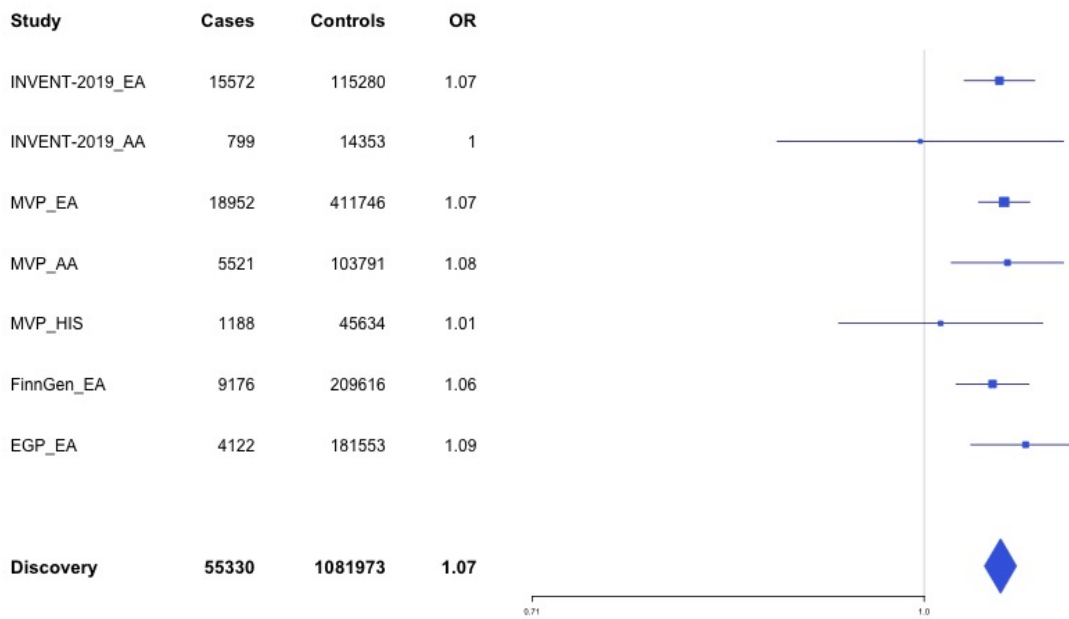

Supplementary Figure 1.60 – rs8013957 (chr14:103140254) in locus 99 (RCOR1)

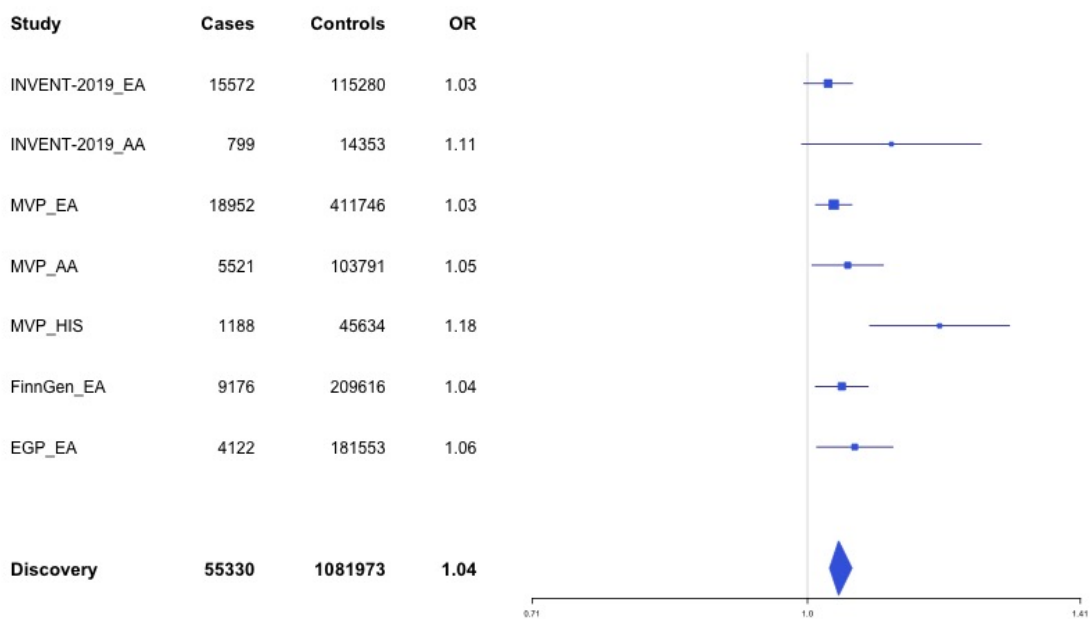



Supplementary Figure 1.61 – rs55707100 (chr15:43820717) in locus 100 (MAP1A)

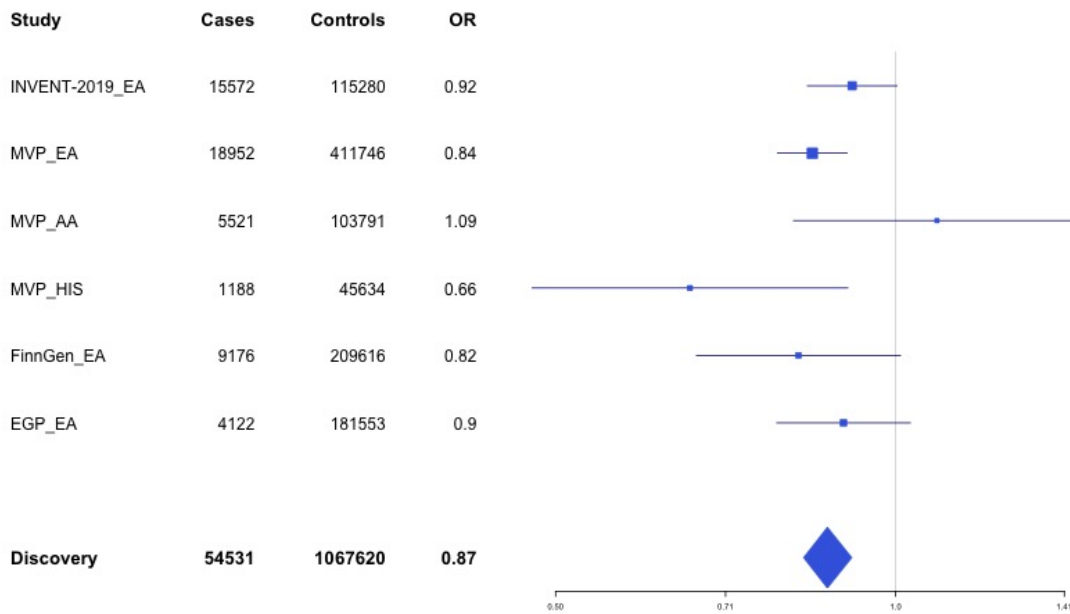

Supplementary Figure 1.62 – rs59442804 (chr15:60899031) in locus 101 (RORA-AS1)

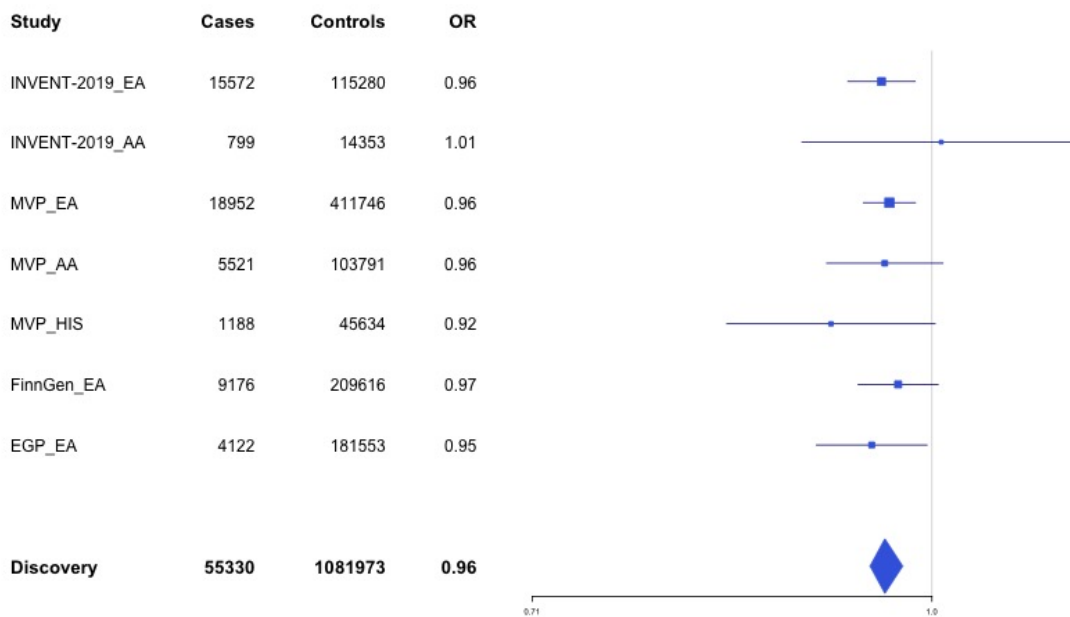

Supplementary Figure 1.63 – rs182906510 (chr15:67372922) in locus 102 (SMAD3)

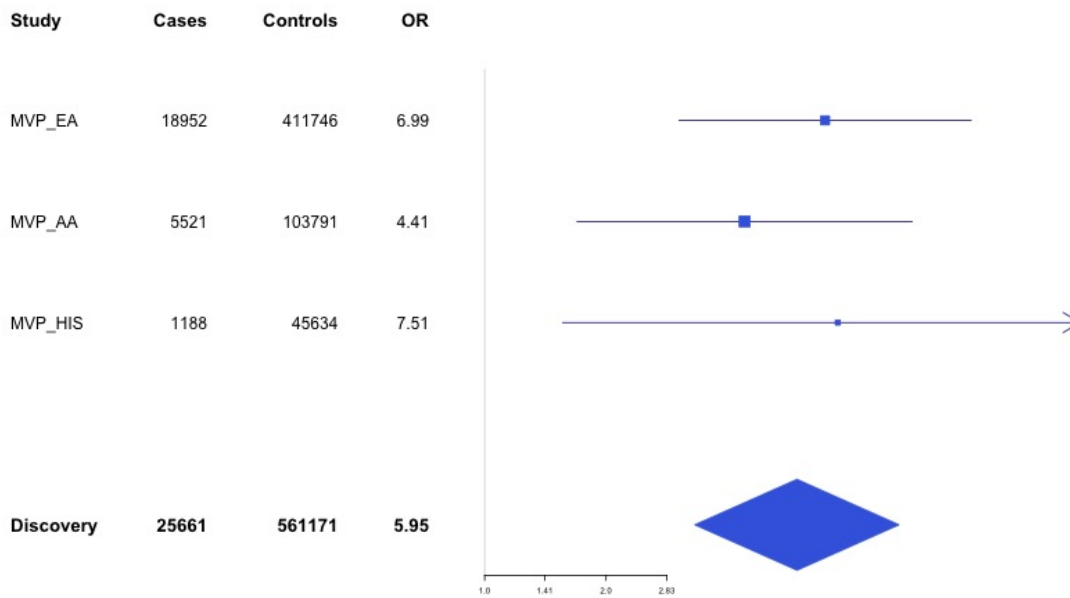

Supplementary Figure 1.64 – rs12443808 (chr16:30996871) in locus 106 (HSD3B7)

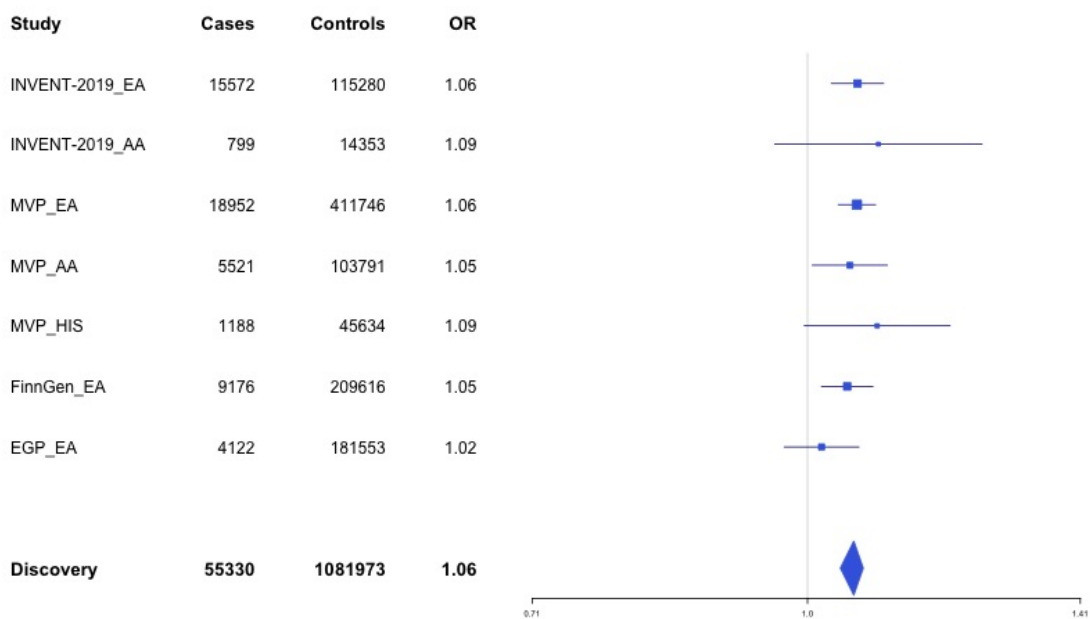

Supplementary Figure 1.65 – rs56943275 (chr16:81898152) in locus 109 (PLCG2)

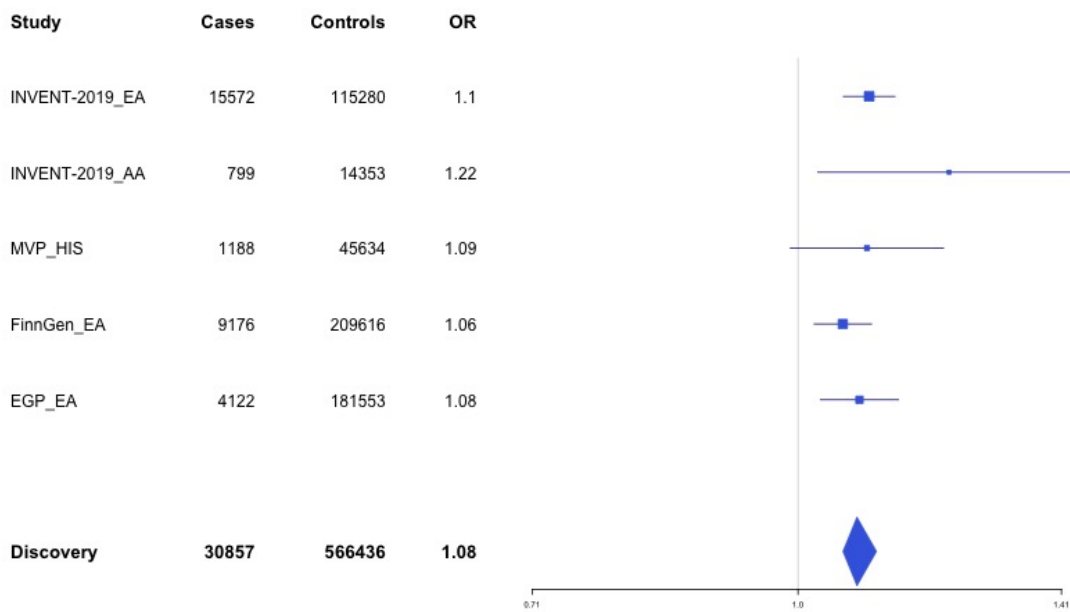

Supplementary Figure 1.66 – rs28634651 (chr16:88553198) in locus 111 (ZFPM1)

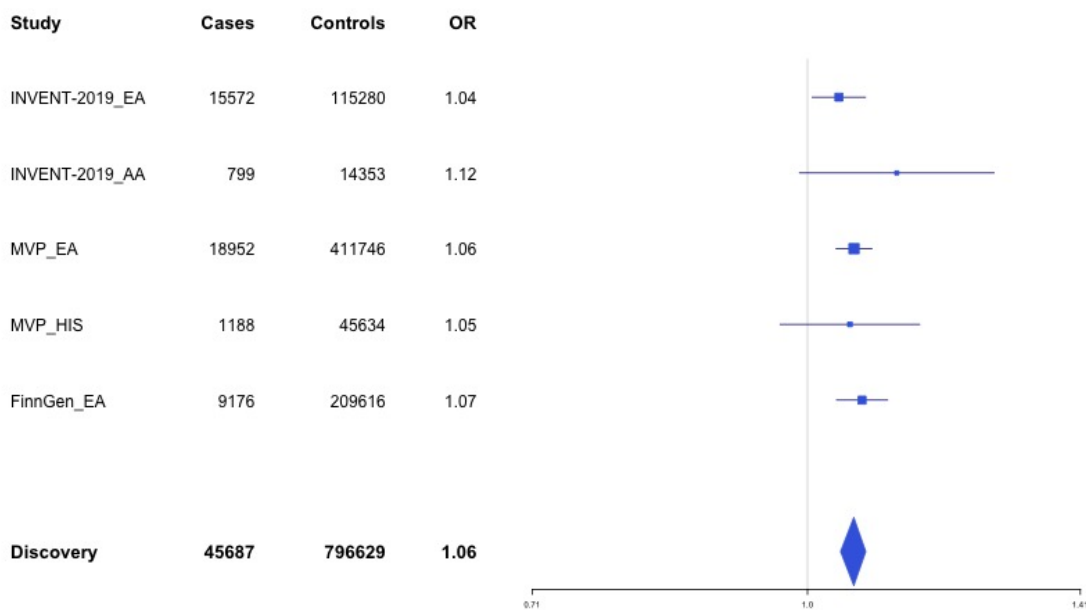

Supplementary Figure 1.67 – rs6503222 (chr17:1977862) in locus 112 (SMG6)

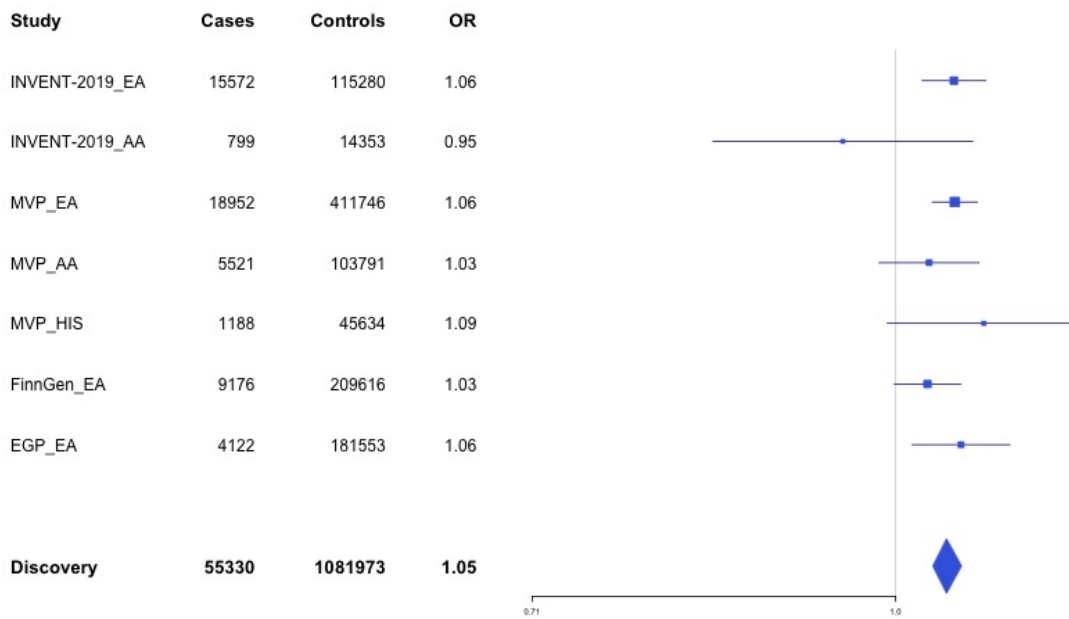

Supplementary Figure 1.68 – rs7225756 (chr17:6893691) in locus 113 (ALOX12-AS1)

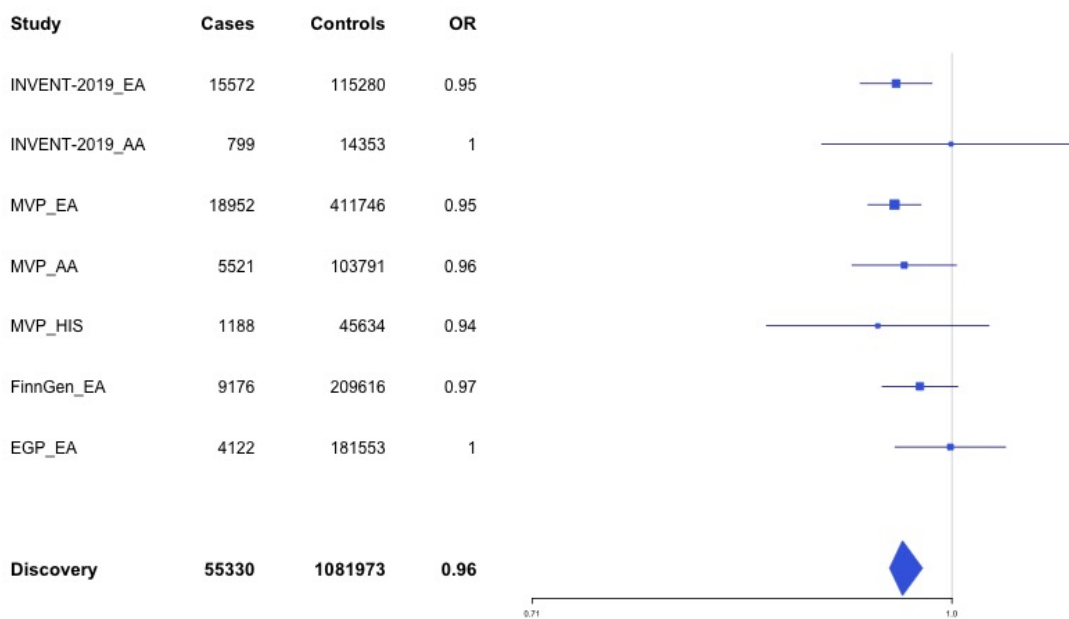

Supplementary Figure 1.69 – rs62054822 (chr17:43927708) in locus 115 (MAPT-AS1)

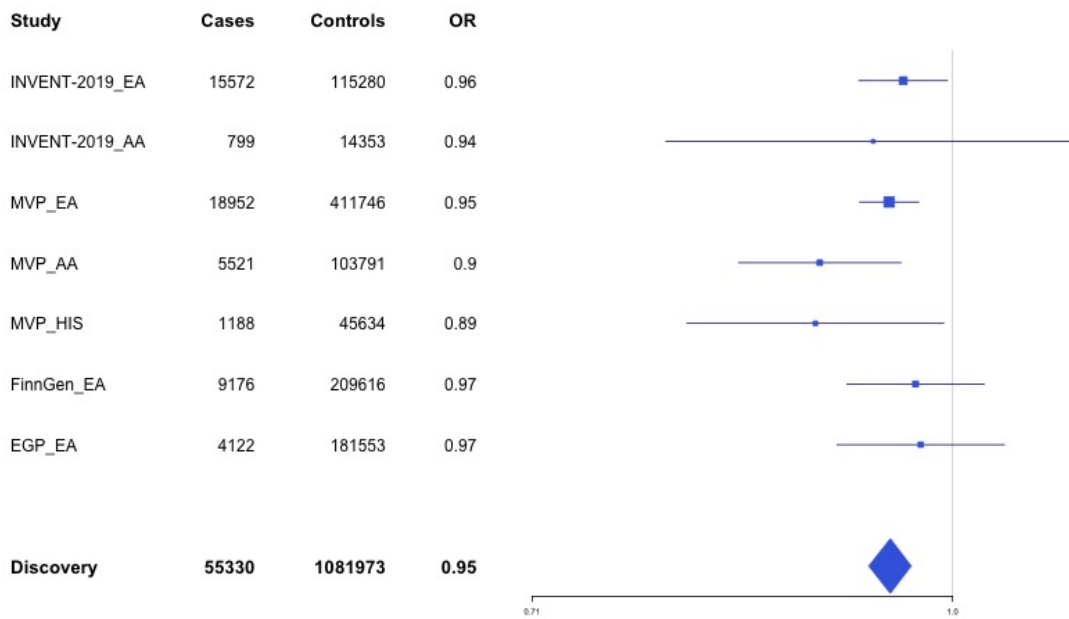

Supplementary Figure 1.70 – rs142140545 (chr17:64191540) in locus 116 (CEP112;APOH)

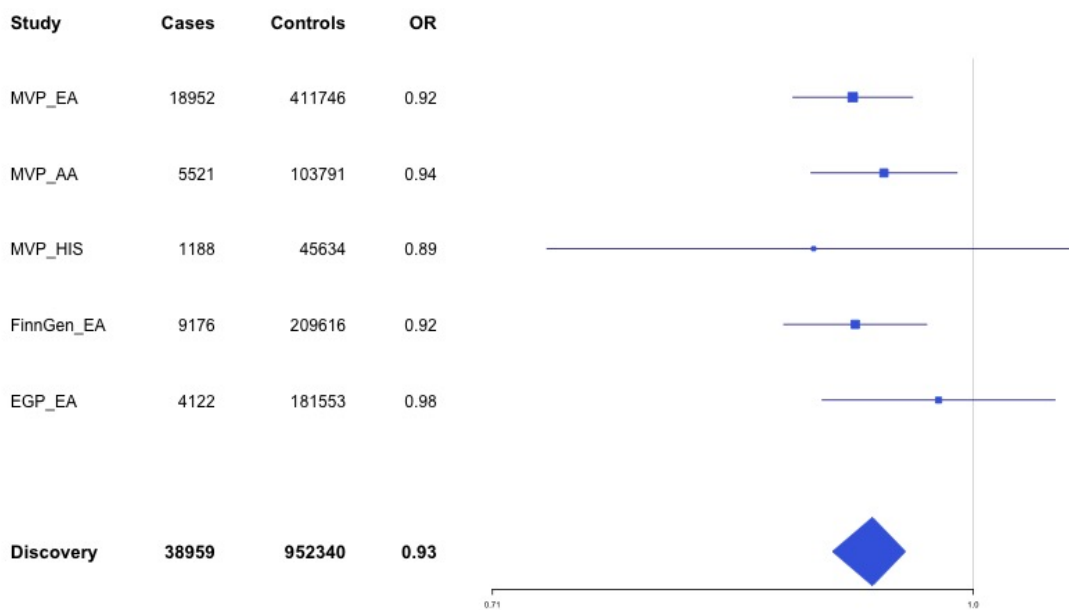

Supplementary Figure 1.71 – rs59277920 (chr19:6077231) in locus 118 (RFX2)

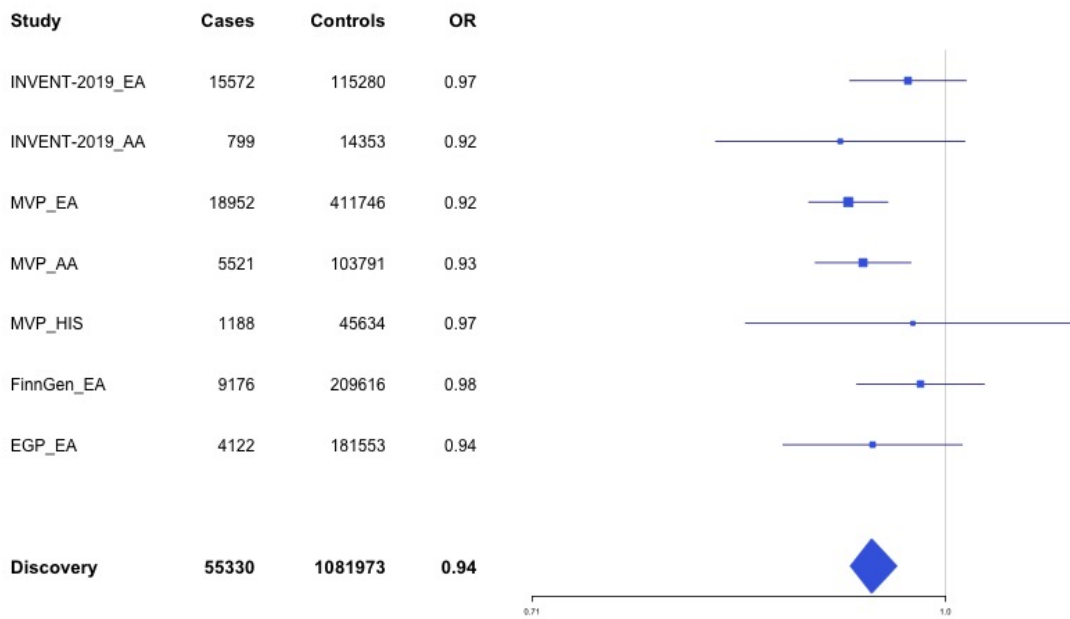

Supplementary Figure 1.72 – rs8110055 (chr19:10739143) in locus 119 (SLC44A2)

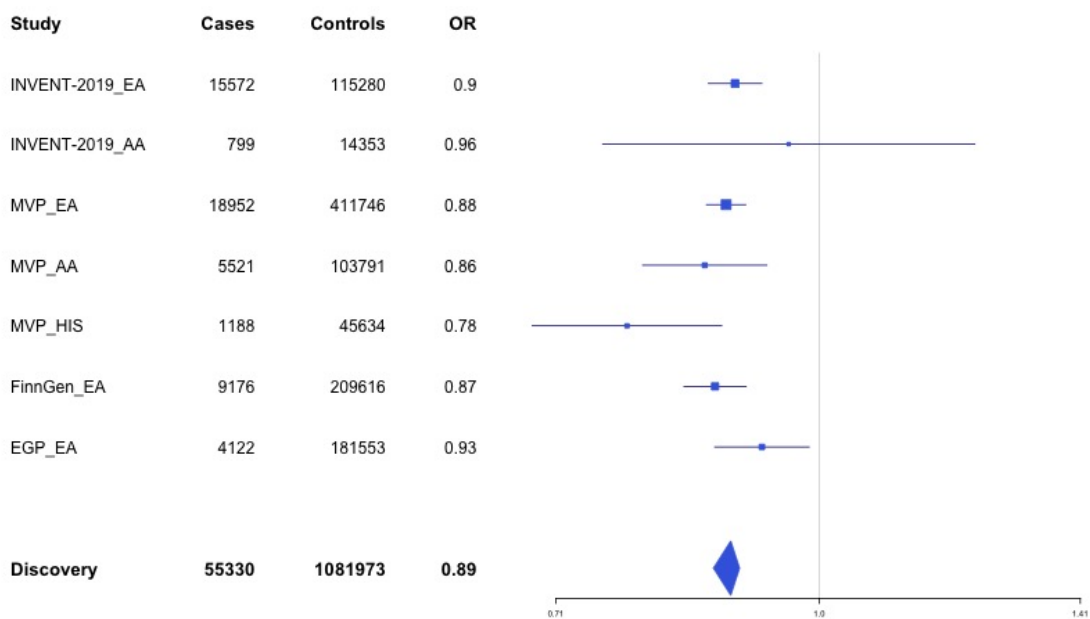

Supplementary Figure 1.73 – rs34783010 (chr19:46180414) in locus 122 (GIPR)

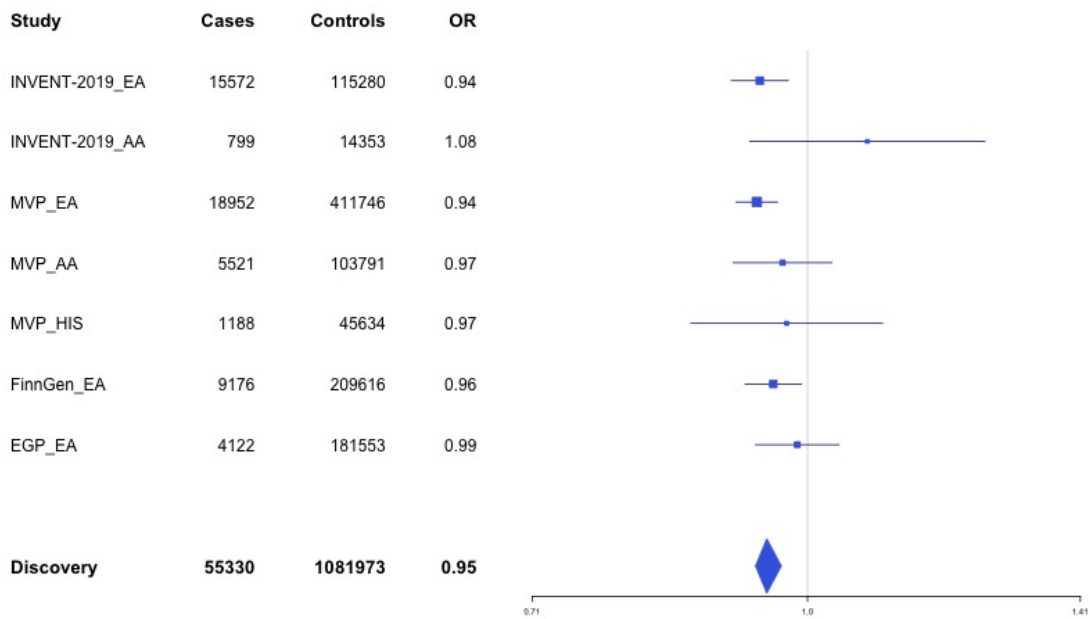

Supplementary Figure 1.74 – rs1688264 (chr19:49209560) in locus 123 (FUT2)

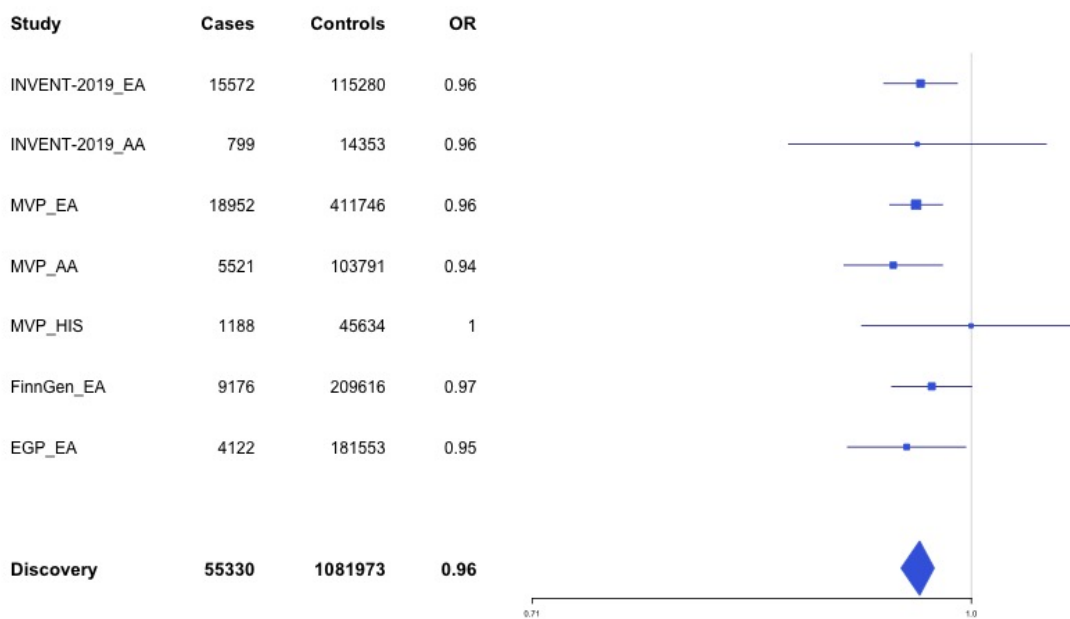

Supplementary Figure 1.75 – rs1654425 (chr19:55538980) in locus 124 (GP6)

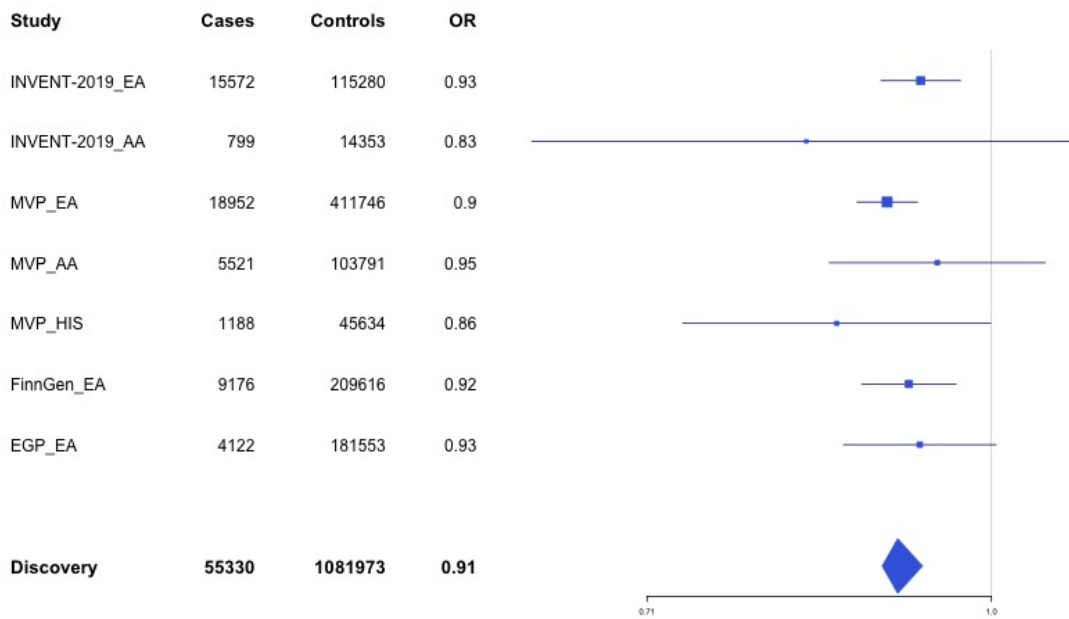

Supplementary Figure 1.76 – rs2631628 (chr19:56645250) in locus 125 (ZNF787;ZNF444)

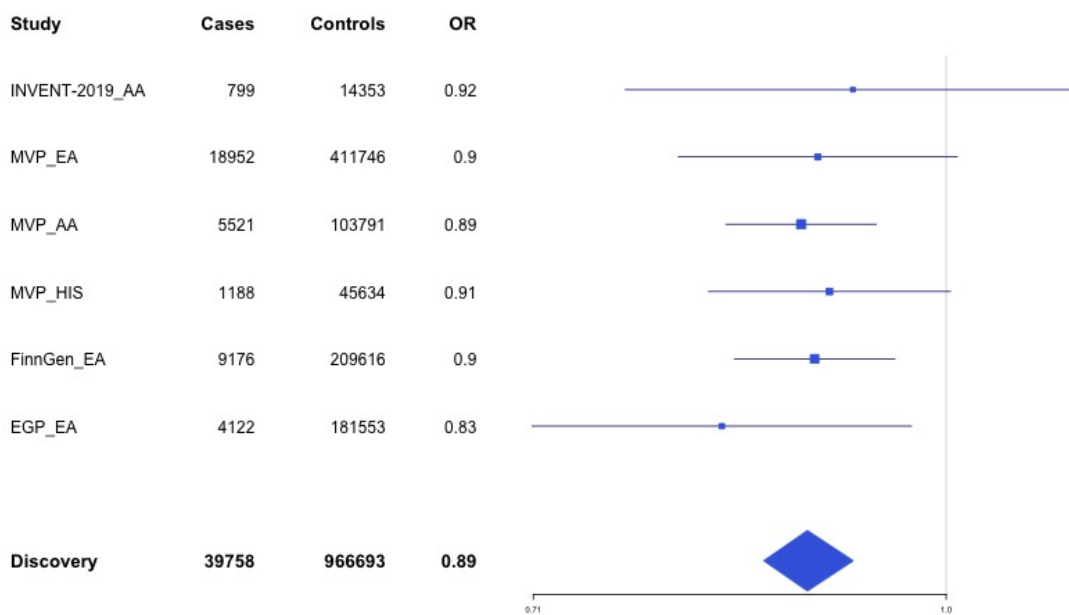



Supplementary Figure 1.77 – rs79388863 (chr20:23168500) in locus 126 (LINC00656;NXT1)

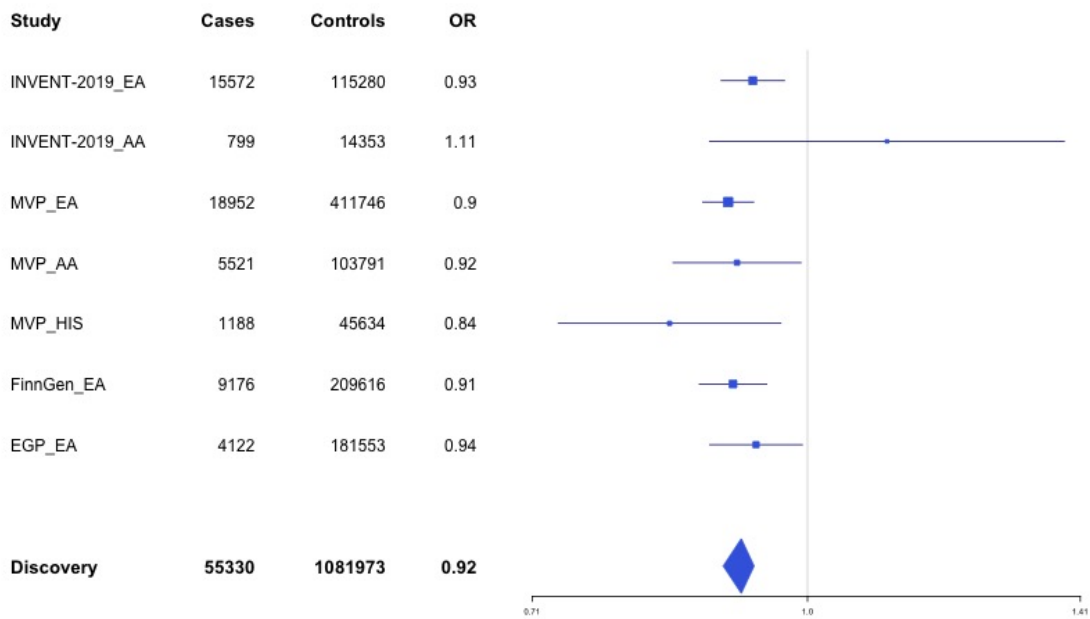

Supplementary Figure 1.78 – rs6060288 (chr20:33772243) in locus 127 (MMP24-AS1-EDEM2)

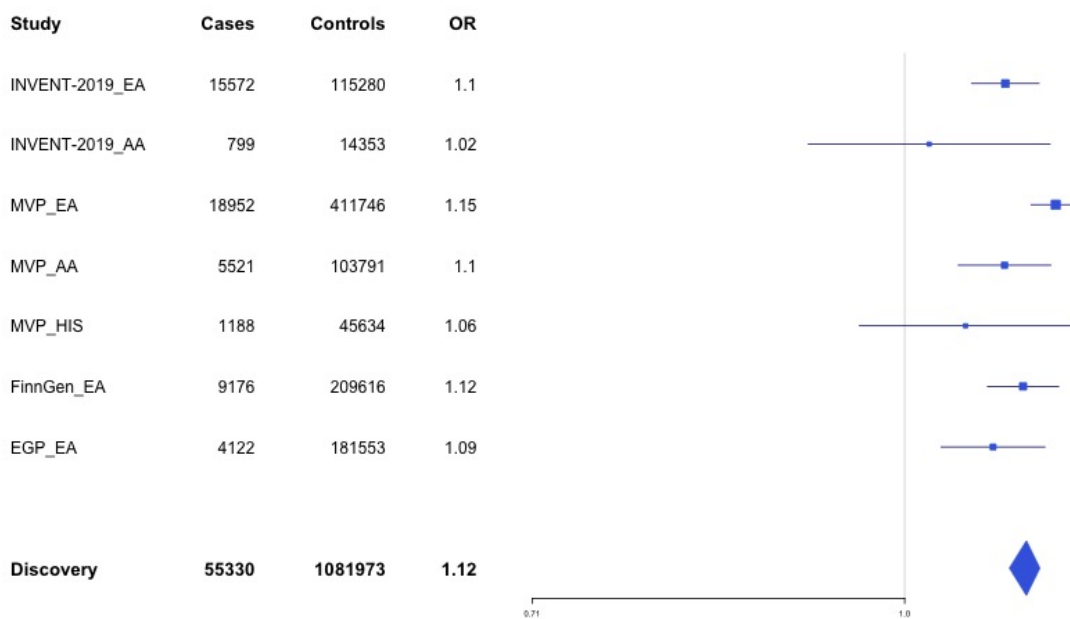

Supplementary Figure 1.79 – rs4820093 (chr22:33160208) in locus 129 (SYN3)

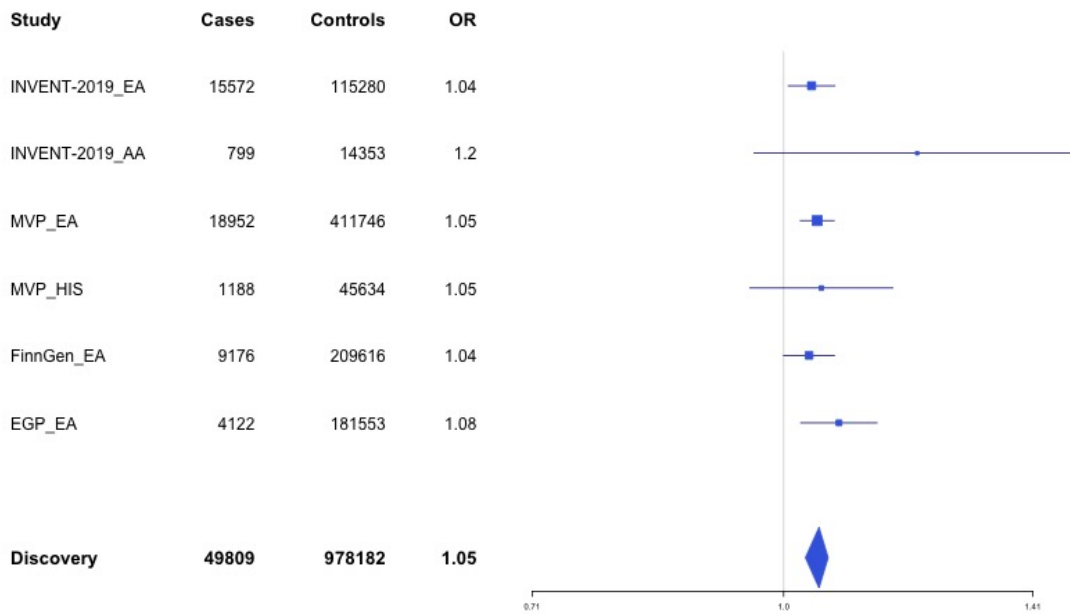

Supplementary Figure 1.80 – rs9611844 (chr22:43115776) in locus 130 (A4GALT)

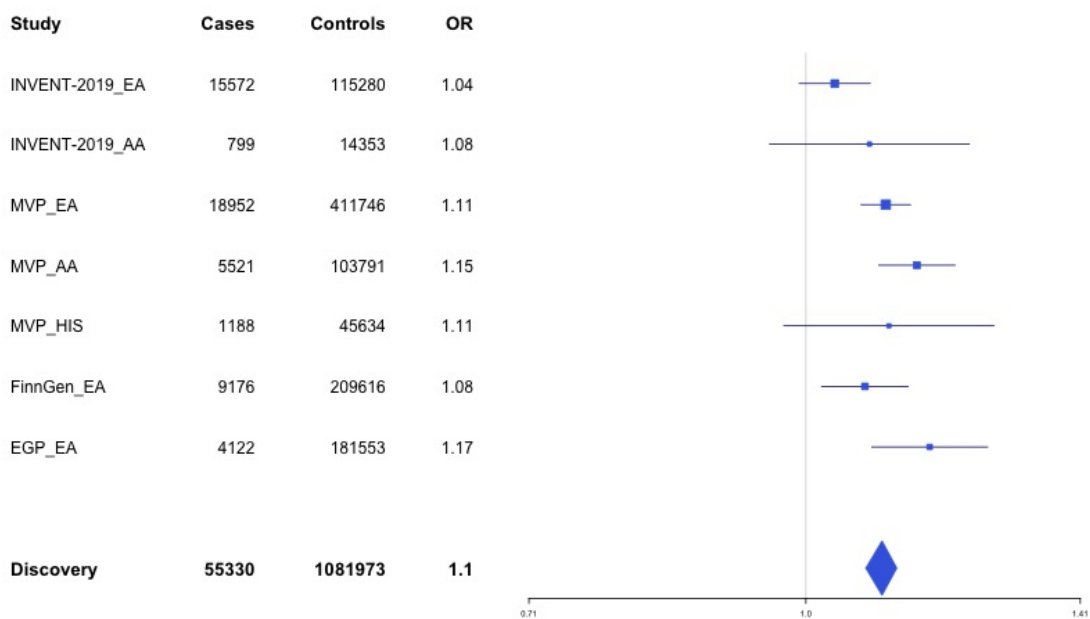

Supplementary Figure 1.81 – rs34609587 (chr23:11657363) in locus 131 (ARHGAP6)

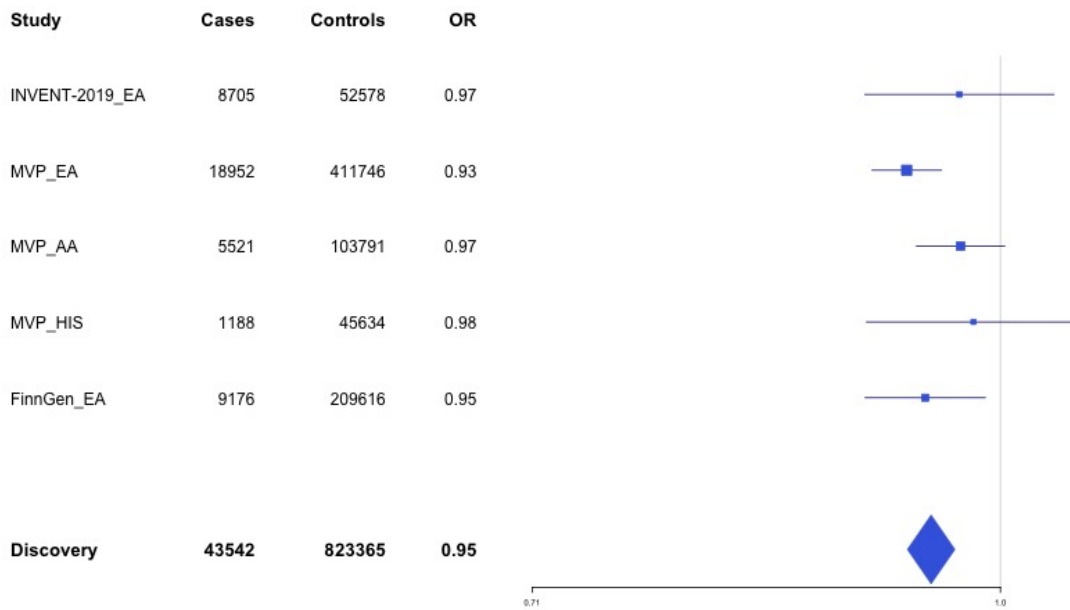

Supplementary Figure 1.82 – rs6632109 (chr23:34894638) in locus 132 (TMEM47;FAM47B)

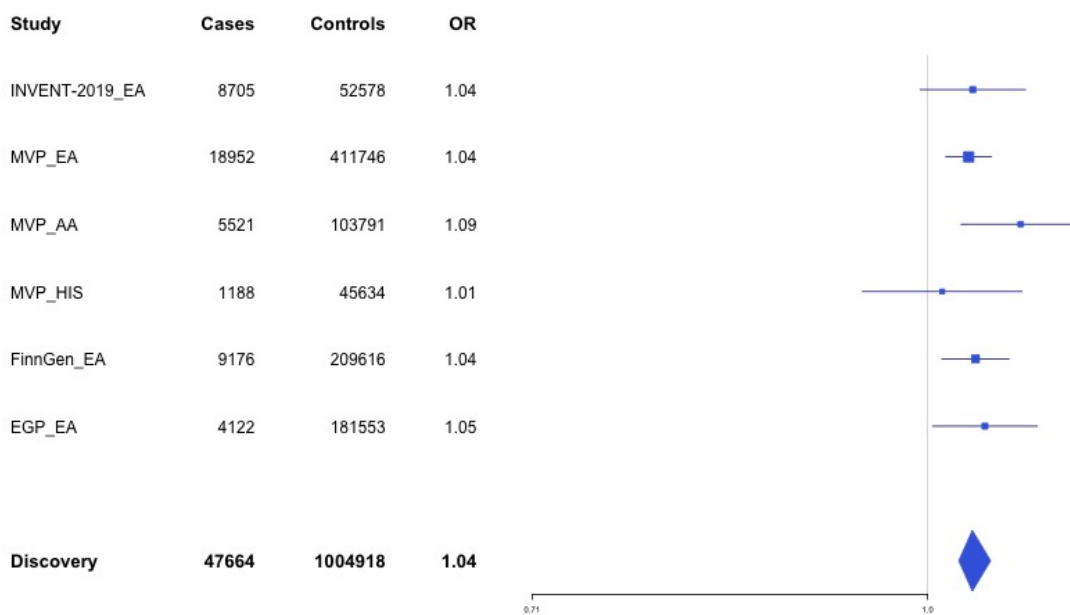

Supplementary Figure 1.83 – rs3002416 (chr23:39710195) in locus 133 (MIR1587;BCOR)

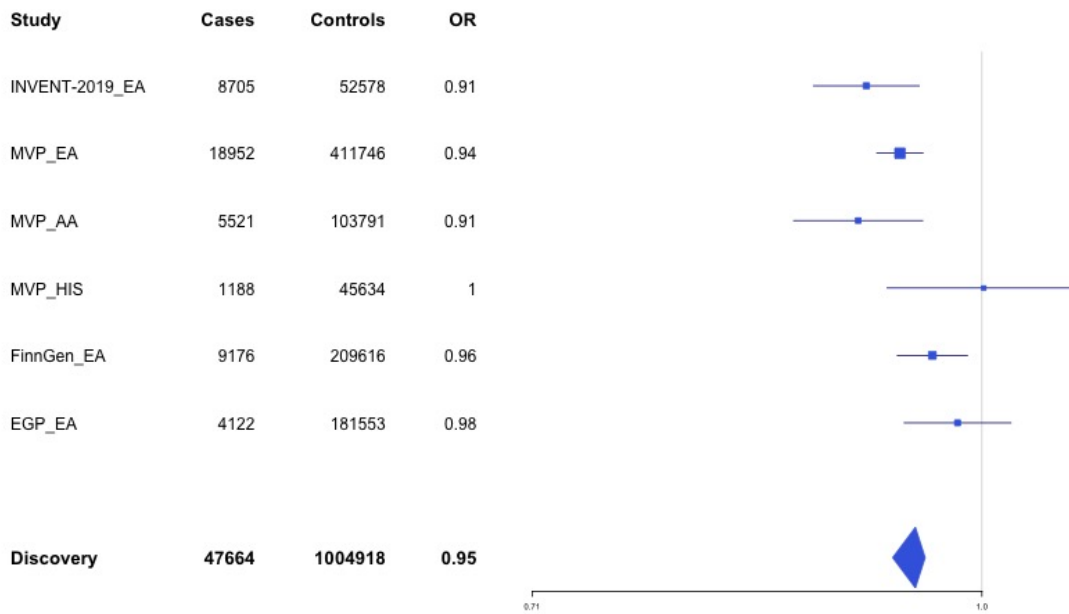

Supplementary Figure 1.84 – rs6048 (chr23:138633280) in locus 134 (F9)

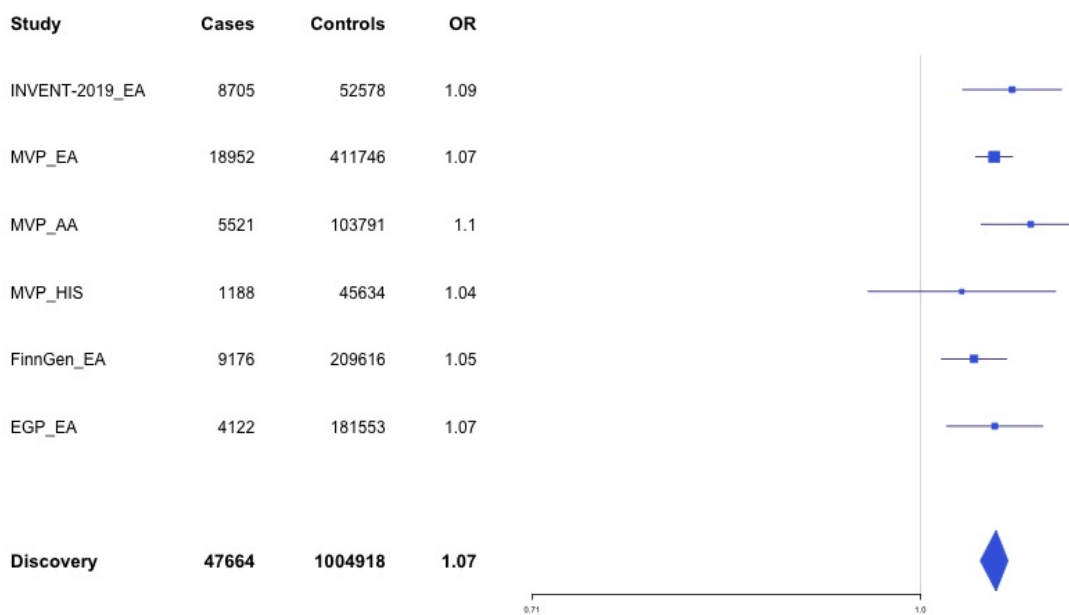

**Supplementary Figure 1.85** – rs2084408 (chr23:154346709) in locus 135 (BRCC3)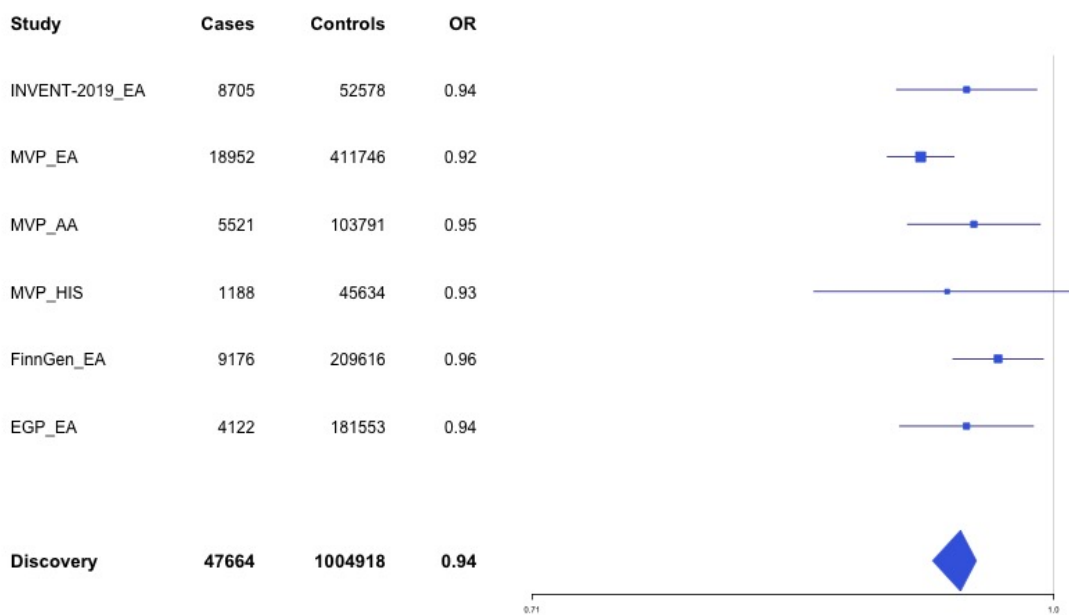

Supplement: Supplementary file [file media-1.pdf]
