# Supplementary material for: Cross-Ancestry Investigation of Venous Thromboembolism Genomic Predictors
Source: bioRxiv or medRxiv preprint supplement (doi:10.1101/2022.03.04.22271003), 2022-03-08

**Supplementary Figure 2.****Forest plots of Combined analysis lead variants.**

|      |                                                                |    |
|------|----------------------------------------------------------------|----|
| 2.1  | rs12121476 (chr1:9335327) in locus 1 (H6PD;SPSB1)              | 4  |
| 2.2  | rs551176418 (chr1:27107263) in locus 2 (ARID1A)                | 4  |
| 2.3  | rs6695572 (chr1:77945635) in locus 3 (AK5)                     | 5  |
| 2.4  | rs3832016 (chr1:109818158) in locus 4 (CELSR2)                 | 5  |
| 2.5  | rs3767812 (chr1:118155620) in locus 5 (TENT5C)                 | 6  |
| 2.6  | rs1267881263 (chr1:150496127) in locus 6 (FALEC;ADAMTSL4)      | 6  |
| 2.7  | rs905938 (chr1:154991389) in locus 7 (DCST2)                   | 7  |
| 2.8  | rs3557 (chr1:161188893) in locus 8 (FCER1G)                    | 7  |
| 2.9  | rs6025 (chr1:169519049) in locus 9 (F5)                        | 8  |
| 2.10 | rs6695940 (chr1:173882980) in locus 10 (SERPINC1)              | 8  |
| 2.11 | rs143410348 (chr1:196809316) in locus 12 (CFHR1;CFHR4)         | 9  |
| 2.12 | rs2842700 (chr1:207282149) in locus 13 (C4BPA)                 | 9  |
| 2.13 | rs3811444 (chr1:248039451) in locus 14 (TRIM58)                | 10 |
| 2.14 | rs78475244 (chr2:65086804) in locus 16 (LINC01800)             | 10 |
| 2.15 | rs1867312 (chr2:68619981) in locus 17 (PLEK)                   | 11 |
| 2.16 | rs1518760 (chr2:128140500) in locus 18 (MAP3K2)                | 11 |
| 2.17 | rs1912849 (chr2:188310118) in locus 19 (CALCRL)                | 12 |
| 2.18 | rs78872368 (chr2:198545250) in locus 20 (RFTN2;MARS2)          | 12 |
| 2.19 | rs715 (chr2:211543055) in locus 21 (CPS1)                      | 13 |
| 2.20 | rs68066031 (chr2:224880498) in locus 22 (SERPINE2)             | 13 |
| 2.21 | rs13084580 (chr3:39188182) in locus 24 (CSRNP1)                | 14 |
| 2.22 | rs11130326 (chr3:52771920) in locus 25 (NEK4)                  | 14 |
| 2.23 | rs529326506 (chr3:90503764) in locus 26 (EPHA3;NONE)           | 15 |
| 2.24 | rs28479320 (chr3:93752529) in locus 27 (ARL13B)                | 15 |
| 2.25 | rs900399 (chr3:156798732) in locus 30 (LINC02029;LINC00880)    | 16 |
| 2.26 | rs710446 (chr3:186459927) in locus 32 (KNG1)                   | 16 |
| 2.27 | rs3796159 (chr3:194790434) in locus 33 (XXYLT1)                | 17 |
| 2.28 | rs9654093 (chr4:7903763) in locus 34 (AFAP1)                   | 17 |
| 2.29 | rs781656 (chr4:57778645) in locus 35 (REST)                    | 18 |
| 2.30 | rs6826579 (chr4:83785031) in locus 36 (SEC31A)                 | 18 |
| 2.31 | rs2014912 (chr4:86715670) in locus 37 (ARHGAP24)               | 19 |
| 2.32 | rs2066864 (chr4:155525695) in locus 39 (FGG)                   | 19 |
| 2.33 | rs3756011 (chr4:187206249) in locus 40 (F11)                   | 20 |
| 2.34 | rs16867574 (chr5:38708554) in locus 42 (OSMR-AS1)              | 20 |
| 2.35 | rs7730244 (chr5:72957088) in locus 43 (ARHGGEF28)              | 21 |
| 2.36 | rs750465397 (chr5:96289036) in locus 44 (LNPEP)                | 21 |
| 2.37 | rs147133967 (chr5:132426851) in locus 45 (HSPA4)               | 22 |
| 2.38 | rs214059 (chr6:25536937) in locus 46 (CARMIL1)                 | 22 |
| 2.39 | rs2394251 (chr6:29943688) in locus 47 (HCG9)                   | 23 |
| 2.40 | rs9268863 (chr6:32430289) in locus 48 (HLA-DRA;HLA-DRB5)       | 23 |
| 2.41 | rs145294670 (chr6:34622561) in locus 49 (ILRUN)                | 24 |
| 2.42 | rs9386182 (chr6:147691069) in locus 52 (STXBP5)                | 24 |
| 2.43 | rs1513275 (chr7:28259233) in locus 53 (JAZF1-AS1)              | 25 |
| 2.44 | rs42038 (chr7:92243719) in locus 54 (CDK6)                     | 25 |
| 2.45 | rs10099512 (chr8:9178821) in locus 57 (LOC101929128;LOC157273) | 26 |
| 2.46 | rs2048528 (chr8:23373680) in locus 59 (ENTPD4;SLC25A37)        | 26 |
| 2.47 | rs2685412 (chr8:27810603) in locus 60 (SCARA5)                 | 27 |
| 2.48 | rs2915595 (chr8:30402817) in locus 61 (RBPMS)                  | 27 |
| 2.49 | rs6993770 (chr8:106581528) in locus 62 (ZFPM2)                 | 28 |
| 2.50 | rs4236786 (chr8:108291878) in locus 63 (ANGPT1)                | 28 |

|       |                                                                  |    |
|-------|------------------------------------------------------------------|----|
| 2.51  | rs10820606 (chr9:99192919) in locus 65 (ZNF367;HABP4)            | 29 |
| 2.52  | rs505922 (chr9:136149229) in locus 66 (ABO)                      | 29 |
| 2.53  | rs1243187 (chr10:21907016) in locus 68 (MLLT10)                  | 30 |
| 2.54  | rs4272700 (chr10:27881308) in locus 69 (RAB18;MKX)               | 30 |
| 2.55  | rs17490626 (chr10:71218646) in locus 72 (TSPAN15)                | 31 |
| 2.56  | rs16937003 (chr10:80938499) in locus 73 (ZMIZ1)                  | 31 |
| 2.57  | rs57866767 (chr10:96023077) in locus 74 (PLCE1)                  | 32 |
| 2.58  | rs10886430 (chr10:121010256) in locus 75 (GRK5)                  | 32 |
| 2.59  | rs2030291 (chr11:16251251) in locus 77 (SOX6)                    | 33 |
| 2.60  | rs11032074 (chr11:32993887) in locus 78 (QSER1)                  | 33 |
| 2.61  | rs1799963 (chr11:46761055) in locus 79 (F2)                      | 34 |
| 2.62  | rs141798115 (chr11:56875074) in locus 80 (OR5AK4P;LRRC55)        | 34 |
| 2.63  | rs4354705 (chr11:60088159) in locus 81 (MS4A4A;MS4A6E)           | 35 |
| 2.64  | rs174551 (chr11:61573684) in locus 82 (FADS1)                    | 35 |
| 2.65  | rs2846027 (chr11:114003415) in locus 84 (ZBTB16)                 | 36 |
| 2.66  | rs35257264 (chr11:126296816) in locus 85 (ST3GAL4)               | 36 |
| 2.67  | rs7107568 (chr11:130779668) in locus 86 (SNX19)                  | 37 |
| 2.68  | rs1558519 (chr12:6153738) in locus 87 (VWF)                      | 37 |
| 2.69  | rs7311483 (chr12:9053661) in locus 88 (A2ML1;PHC1)               | 38 |
| 2.70  | rs6580981 (chr12:54723028) in locus 89 (COPZ1)                   | 38 |
| 2.71  | rs142351376 (chr12:104136288) in locus 90 (STAB2)                | 39 |
| 2.72  | rs3184504 (chr12:111884608) in locus 91 (SH2B3)                  | 39 |
| 2.73  | rs2851435 (chr12:123712416) in locus 92 (MPHOSPH9)               | 40 |
| 2.74  | rs3211752 (chr13:113787459) in locus 94 (F10)                    | 40 |
| 2.75  | rs11158204 (chr14:58844526) in locus 95 (ARID4A;TOMM20L)         | 41 |
| 2.76  | rs2127869 (chr14:65794352) in locus 96 (LINC02324;MIR4708)       | 41 |
| 2.77  | rs7152641 (chr14:92213967) in locus 97 (CATSPERB;TC2N)           | 42 |
| 2.78  | rs28929474 (chr14:94844947) in locus 98 (SERPINA1)               | 42 |
| 2.79  | rs28519971 (chr14:103089808) in locus 99 (RCOR1)                 | 43 |
| 2.80  | rs1247656151 (chr15:43677975) in locus 100 (TUBGCP4)             | 43 |
| 2.81  | rs7183672 (chr15:96101018) in locus 103 (LINC00924;LOC105369212) | 44 |
| 2.82  | rs71376077 (chr16:15738114) in locus 105 (NDE1)                  | 44 |
| 2.83  | rs12443808 (chr16:30996871) in locus 106 (HSD3B7)                | 45 |
| 2.84  | rs7197453 (chr16:72079127) in locus 107 (DHODH;HP)               | 45 |
| 2.85  | rs77246010 (chr16:75429853) in locus 108 (CFDP1)                 | 46 |
| 2.86  | rs12445050 (chr16:81870969) in locus 109 (PLCG2)                 | 46 |
| 2.87  | rs8049403 (chr16:85778651) in locus 110 (C16orf74)               | 47 |
| 2.88  | rs28634651 (chr16:88553198) in locus 111 (ZFPM1)                 | 47 |
| 2.89  | rs6503222 (chr17:1977862) in locus 112 (SMG6)                    | 48 |
| 2.90  | rs434473 (chr17:6904934) in locus 113 (ALOX12)                   | 48 |
| 2.91  | rs71138827 (chr17:27833678) in locus 114 (TAOK1)                 | 49 |
| 2.92  | rs62054822 (chr17:43927708) in locus 115 (MAPT-AS1)              | 49 |
| 2.93  | rs1801690 (chr17:64208285) in locus 116 (APOH)                   | 50 |
| 2.94  | rs573431210 (chr17:67276383) in locus 117 (ABCA5)                | 50 |
| 2.95  | rs59277920 (chr19:6077231) in locus 118 (RFX2)                   | 51 |
| 2.96  | rs8110055 (chr19:10739143) in locus 119 (SLC44A2)                | 51 |
| 2.97  | rs889139 (chr19:33889369) in locus 120 (PEPD)                    | 52 |
| 2.98  | rs2545774 (chr19:41287674) in locus 121 (RAB4B)                  | 52 |
| 2.99  | rs8108474 (chr19:46301479) in locus 122 (RSPH6A)                 | 53 |
| 2.100 | rs2638282 (chr19:49213833) in locus 123 (FUT2;MAMSTR)            | 53 |
| 2.101 | rs1654425 (chr19:55538980) in locus 124 (GP6)                    | 54 |
| 2.102 | rs2631628 (chr19:56645250) in locus 125 (ZNF787;ZNF444)          | 54 |
| 2.103 | rs117390891 (chr20:23168526) in locus 126 (LINC00656;NXT1)       | 55 |

|                                                                          |    |
|--------------------------------------------------------------------------|----|
| 2.104rs6060288 (chr20:33772243) in locus 127 (MMP24-AS1-EDEM2) . . . . . | 55 |
| 2.105rs3070580 (chr22:33165231) in locus 129 (SYN3) . . . . .            | 56 |
| 2.106rs9611844 (chr22:43115776) in locus 130 (A4GALT) . . . . .          | 56 |
| 2.107rs12388118 (chr23:11380742) in locus 131 (ARHGAP6) . . . . .        | 57 |
| 2.108rs6632109 (chr23:34894638) in locus 132 (TMEM47;FAM47B) . . . . .   | 57 |
| 2.109rs3002416 (chr23:39710195) in locus 133 (MIR1587;BCOR) . . . . .    | 58 |
| 2.110rs6048 (chr23:138633280) in locus 134 (F9) . . . . .                | 58 |
| 2.111rs2084408 (chr23:154346709) in locus 135 (BRCC3) . . . . .          | 59 |

Supplementary Figure 2.1 – rs12121476 (chr1:9335327) in locus 1 (H6PD;SPSB1)

| Study          | Cases        | Controls       | OR          |
|----------------|--------------|----------------|-------------|
| INVENT-2019_EA | 15572        | 115280         | 1.09        |
| INVENT-2019_AA | 799          | 14353          | 0.99        |
| MVP_EA         | 18952        | 411746         | 1.04        |
| MVP_AA         | 5521         | 103791         | 1.05        |
| MVP_HIS        | 1188         | 45634          | 1.13        |
| FinnGen_EA     | 9176         | 209616         | 1.01        |
| EGP_EA         | 4122         | 181553         | 1.03        |
| UKB_EA         | 18385        | 91834          | 1.04        |
| MGB_AA         | 225          | 1481           | 0.94        |
| MGB_EA         | 2967         | 27957          | 1.02        |
| MGB_HIS        | 100          | 1352           | 0.8         |
| UPenn_EA       | 380          | 6210           | 0.99        |
| UPenn_AA       | 203          | 1719           | 0.91        |
| FARIVE_EA      | 545          | 532            | 1.11        |
| BioME_EA       | 200          | 8007           | 0.92        |
| BioME_AA       | 382          | 6074           | 1.1         |
| BioME_HIS      | 397          | 8992           | 1.09        |
| RETROVE_EA     | 400          | 400            | 1.07        |
| GAIT2_EA       | 85           | 850            | 0.8         |
| BBJ_EAS        | 507          | 178366         | 1.02        |
| MESA_EA        | 94           | 2341           | 0.84        |
| MESA_AA        | 72           | 1511           | 1.01        |
| MESA_HIS       | 35           | 1389           | 1.57        |
| <b>Overall</b> | <b>80307</b> | <b>1420988</b> | <b>1.04</b> |

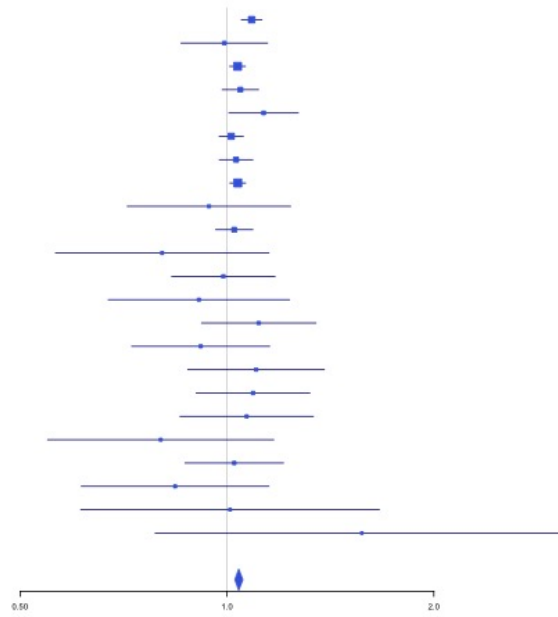

Supplementary Figure 2.2 – rs551176418 (chr1:27107263) in locus 2 (ARID1A)

| Study          | Cases        | Controls       | OR          |
|----------------|--------------|----------------|-------------|
| MVP_EA         | 18952        | 411746         | 1.08        |
| MVP_AA         | 5521         | 103791         | 1.08        |
| MVP_HIS        | 1188         | 45634          | 1.11        |
| FinnGen_EA     | 9176         | 209616         | 1.1         |
| UKB_EA         | 18385        | 91834          | 1.07        |
| UPenn_EA       | 380          | 6210           | 0.95        |
| UPenn_AA       | 203          | 1719           | 0.58        |
| FARIVE_EA      | 545          | 532            | 1.14        |
| BioME_AA       | 382          | 6074           | 1.69        |
| BioME_HIS      | 397          | 8992           | 0.92        |
| BBJ_EAS        | 507          | 178366         | 0.51        |
| MARTHA12_EA    | 893          | 3414           | 0.96        |
| <b>Overall</b> | <b>56529</b> | <b>1067928</b> | <b>1.08</b> |

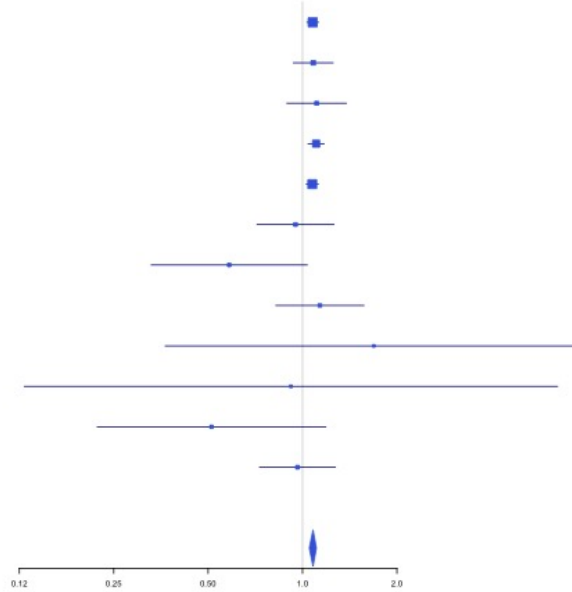

Supplementary Figure 2.3 – rs6695572 (chr1:77945635) in locus 3 (AK5)

| Study          | Cases        | Controls       | OR          |
|----------------|--------------|----------------|-------------|
| INVENT-2019_EA | 15572        | 115280         | 1.05        |
| INVENT-2019_AA | 799          | 14353          | 1.06        |
| MVP_EA         | 18952        | 411746         | 1.03        |
| MVP_AA         | 5521         | 103791         | 1.06        |
| MVP_HIS        | 1188         | 45634          | 1.02        |
| FinnGen_EA     | 9176         | 209616         | 1.05        |
| EGP_EA         | 4122         | 181553         | 1.03        |
| UKB_EA         | 18385        | 91834          | 1.05        |
| MGB_AA         | 225          | 1481           | 1.14        |
| MGB_EA         | 2967         | 27957          | 0.98        |
| MGB_HIS        | 100          | 1352           | 1.2         |
| UPenn_EA       | 380          | 6210           | 1.12        |
| UPenn_AA       | 203          | 1719           | 1.1         |
| FARIVE_EA      | 545          | 532            | 0.96        |
| BioME_EA       | 200          | 8007           | 1.08        |
| BioME_AA       | 382          | 6074           | 1           |
| BioME_HIS      | 397          | 8992           | 1.12        |
| RETROVE_EA     | 400          | 400            | 0.87        |
| GAIT2_EA       | 85           | 850            | 0.97        |
| BBJ_EAS        | 507          | 178366         | 1.12        |
| MESA_EA        | 94           | 2341           | 1.11        |
| MESA_AA        | 72           | 1511           | 1.1         |
| MESA_HIS       | 35           | 1389           | 1.07        |
| <b>Overall</b> | <b>80307</b> | <b>1420988</b> | <b>1.04</b> |

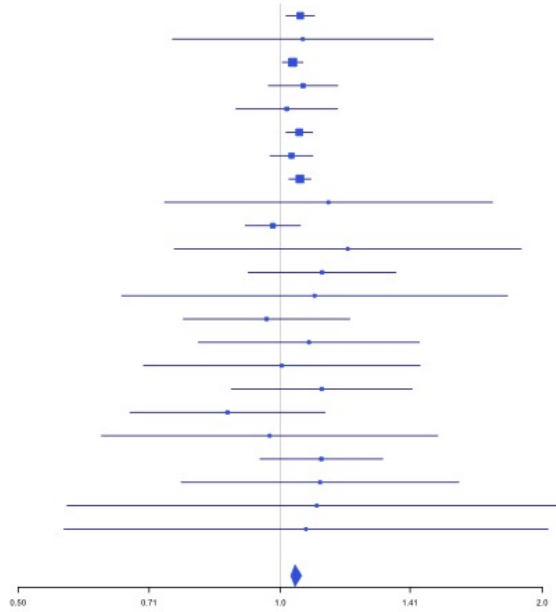

Supplementary Figure 2.4 – rs3832016 (chr1:109818158) in locus 4 (CELSR2)

| Study          | Cases        | Controls       | OR          |
|----------------|--------------|----------------|-------------|
| INVENT-2019_EA | 15572        | 115280         | 0.98        |
| INVENT-2019_AA | 799          | 14353          | 0.99        |
| MVP_EA         | 18952        | 411746         | 0.96        |
| MVP_AA         | 5521         | 103791         | 0.95        |
| MVP_HIS        | 1188         | 45634          | 0.93        |
| FinnGen_EA     | 9176         | 209616         | 0.95        |
| EGP_EA         | 4122         | 181553         | 0.99        |
| UKB_EA         | 18385        | 91834          | 0.94        |
| UKB_AA         | 280          | 1046           | 1.04        |
| UKB_SAS        | 189          | 1269           | 0.86        |
| MGB_AA         | 225          | 1481           | 0.84        |
| MGB_EA         | 2967         | 27957          | 0.97        |
| MGB_HIS        | 100          | 1352           | 0.76        |
| UPenn_EA       | 380          | 6210           | 1           |
| UPenn_AA       | 203          | 1719           | 0.78        |
| FARIVE_EA      | 545          | 532            | 1.05        |
| MARTHA12_EA    | 893          | 3414           | 0.99        |
| <b>Overall</b> | <b>79497</b> | <b>1218787</b> | <b>0.96</b> |

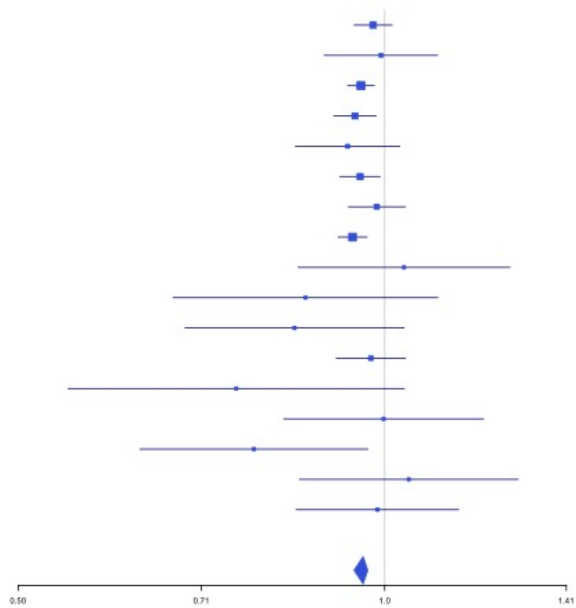

Supplementary Figure 2.5 – rs3767812 (chr1:118155620) in locus 5 (TENT5C)

| Study          | Cases        | Controls       | OR          |
|----------------|--------------|----------------|-------------|
| INVENT-2019_EA | 15572        | 115280         | 1.04        |
| INVENT-2019_AA | 799          | 14353          | 1.14        |
| MVP_EA         | 18952        | 411746         | 1.06        |
| MVP_AA         | 5521         | 103791         | 1.08        |
| MVP_HIS        | 1188         | 45634          | 1.05        |
| FinnGen_EA     | 9176         | 209616         | 1.04        |
| EGP_EA         | 4122         | 181553         | 1           |
| UKB_EA         | 18385        | 91834          | 1.04        |
| UKB_AA         | 280          | 1046           | 1.07        |
| UKB_SAS        | 189          | 1269           | 0.9         |
| MGB_AA         | 225          | 1481           | 1.17        |
| MGB_EA         | 2967         | 27957          | 1.01        |
| MGB_HIS        | 100          | 1352           | 1.29        |
| UPenn_EA       | 380          | 6210           | 1.09        |
| UPenn_AA       | 203          | 1719           | 1           |
| FARIVE_EA      | 545          | 532            | 1.26        |
| BioME_EA       | 200          | 8007           | 0.95        |
| BioME_AA       | 382          | 6074           | 0.98        |
| BioME_HIS      | 397          | 8992           | 0.91        |
| RETROVE_EA     | 400          | 400            | 1.24        |
| GAIT2_EA       | 85           | 850            | 0.93        |
| BBJ_EAS        | 507          | 178366         | 1.09        |
| MESA_EA        | 94           | 2341           | 0.73        |
| MESA_AA        | 72           | 1511           | 0.82        |
| MESA_HIS       | 35           | 1389           | 1.07        |
| <b>Overall</b> | <b>80776</b> | <b>1423303</b> | <b>1.05</b> |

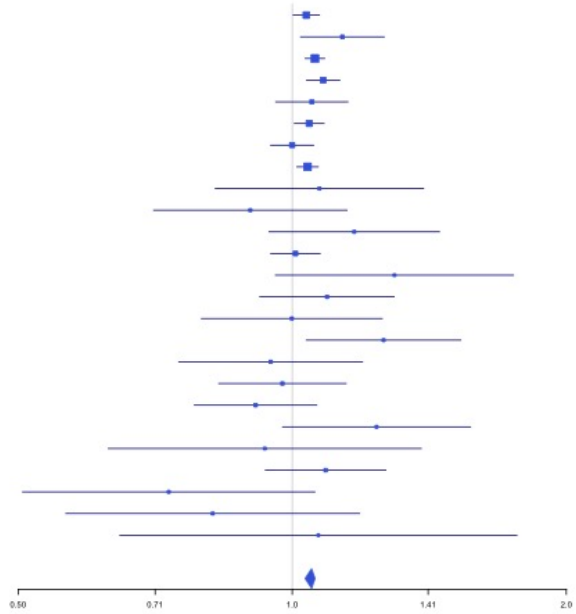

Supplementary Figure 2.6 – rs1267881263 (chr1:150496127) in locus 6 (FALEC;ADAMTSL4)

| Study          | Cases        | Controls      | OR          |
|----------------|--------------|---------------|-------------|
| MVP_EA         | 18952        | 411746        | 1.06        |
| MVP_AA         | 5521         | 103791        | 1.02        |
| MVP_HIS        | 1188         | 45634         | 1.04        |
| UKB_EA         | 18385        | 91834         | 1.04        |
| UKB_AA         | 280          | 1046          | 0.85        |
| UKB_SAS        | 189          | 1269          | 0.95        |
| UPenn_EA       | 380          | 6210          | 1.01        |
| UPenn_AA       | 203          | 1719          | 0.99        |
| FARIVE_EA      | 545          | 532           | 0.98        |
| MARTHA12_EA    | 893          | 3414          | 1.21        |
| <b>Overall</b> | <b>46536</b> | <b>667195</b> | <b>1.04</b> |

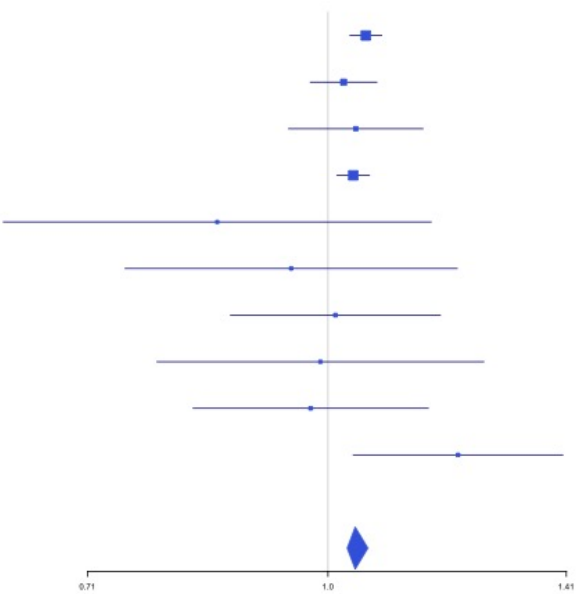

Supplementary Figure 2.7 – rs905938 (chr1:154991389) in locus 7 (DCST2)

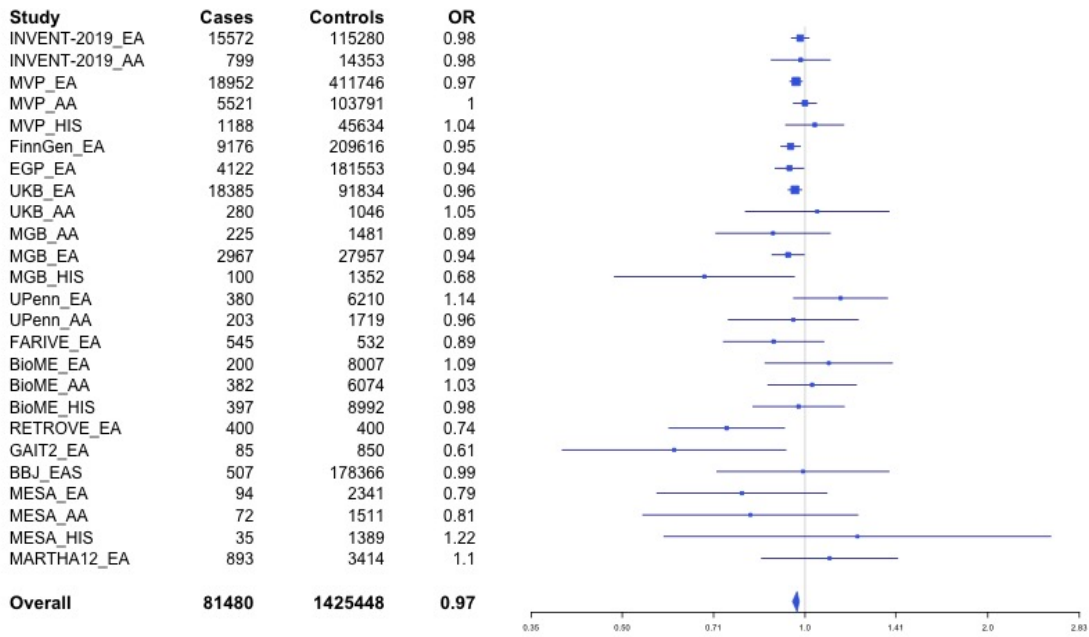

Supplementary Figure 2.8 – rs3557 (chr1:161188893) in locus 8 (FCER1G)

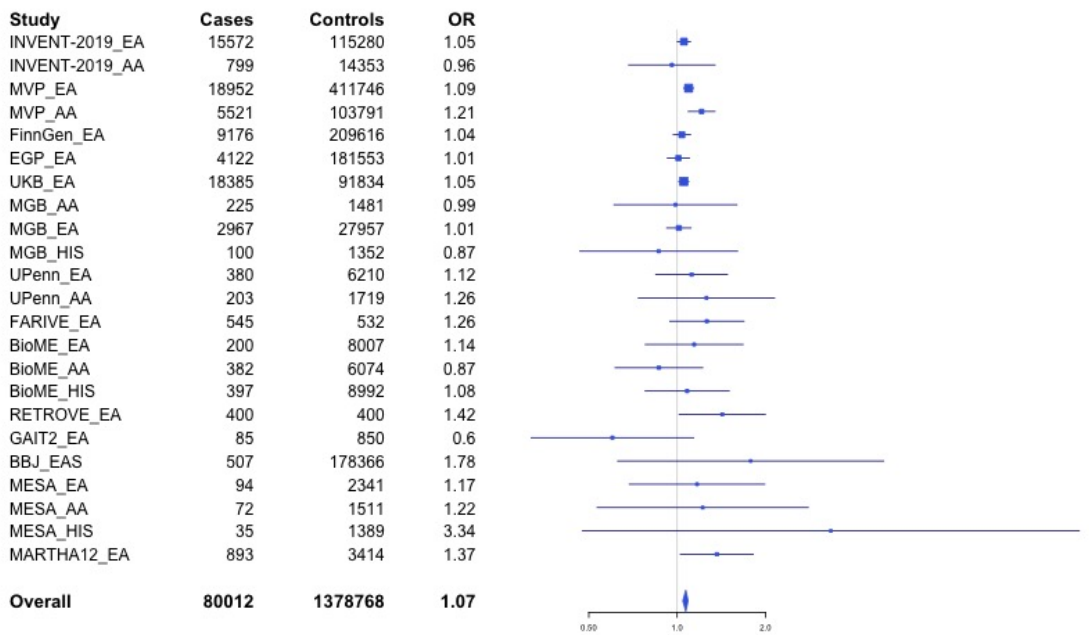



Supplementary Figure 2.9 – rs6025 (chr1:169519049) in locus 9 (F5)

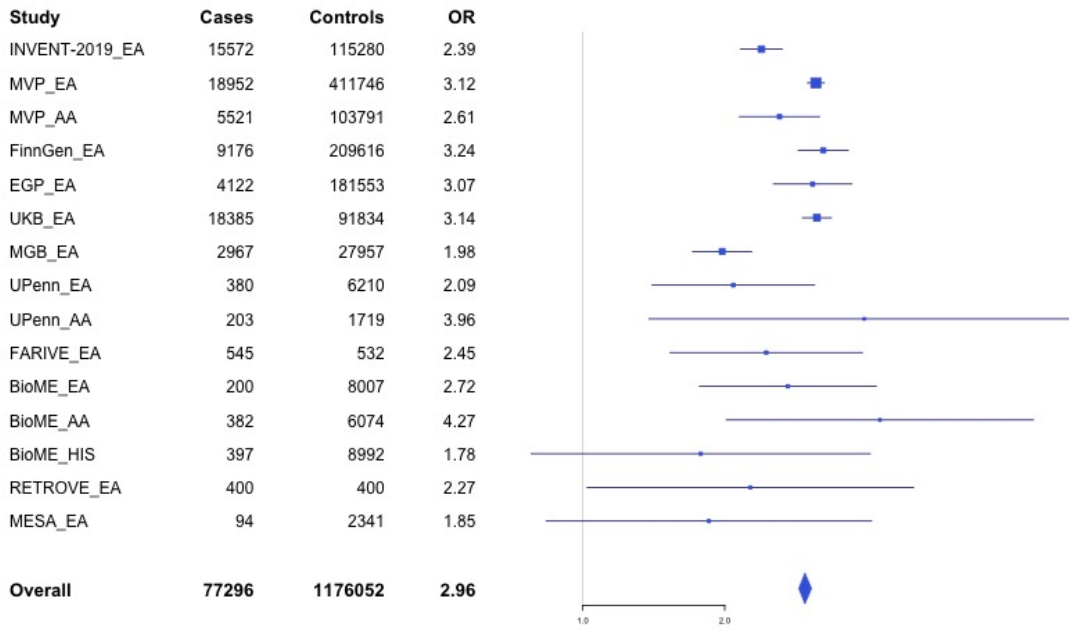

Supplementary Figure 2.10 – rs6695940 (chr1:173882980) in locus 10 (SERPINC1)

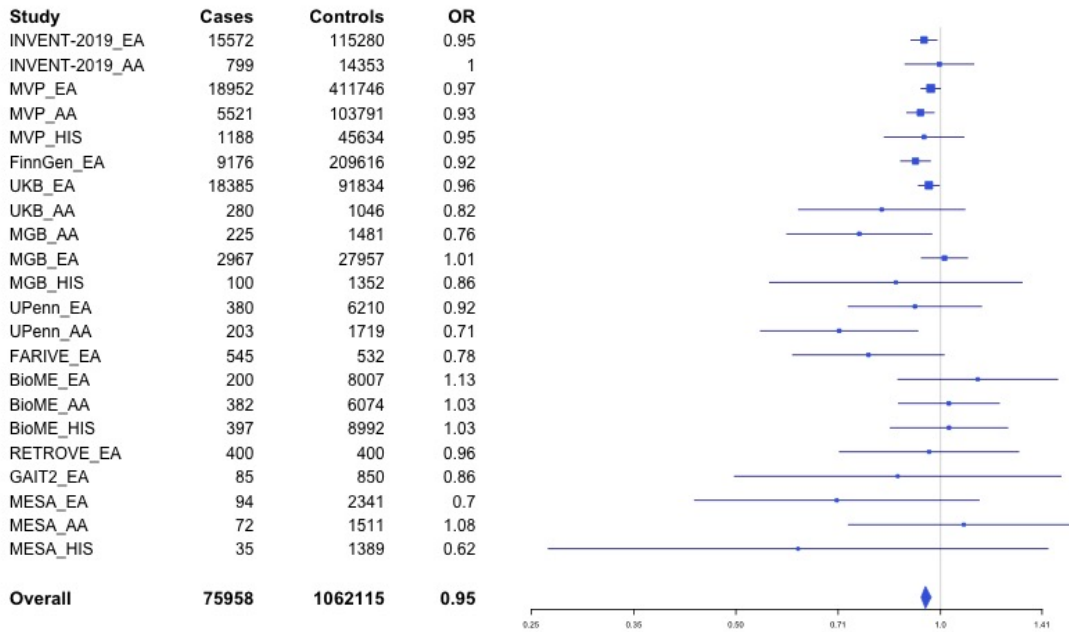



Supplementary Figure 2.11 – rs143410348 (chr1:196809316) in locus 12 (CFHR1;CFHR4)

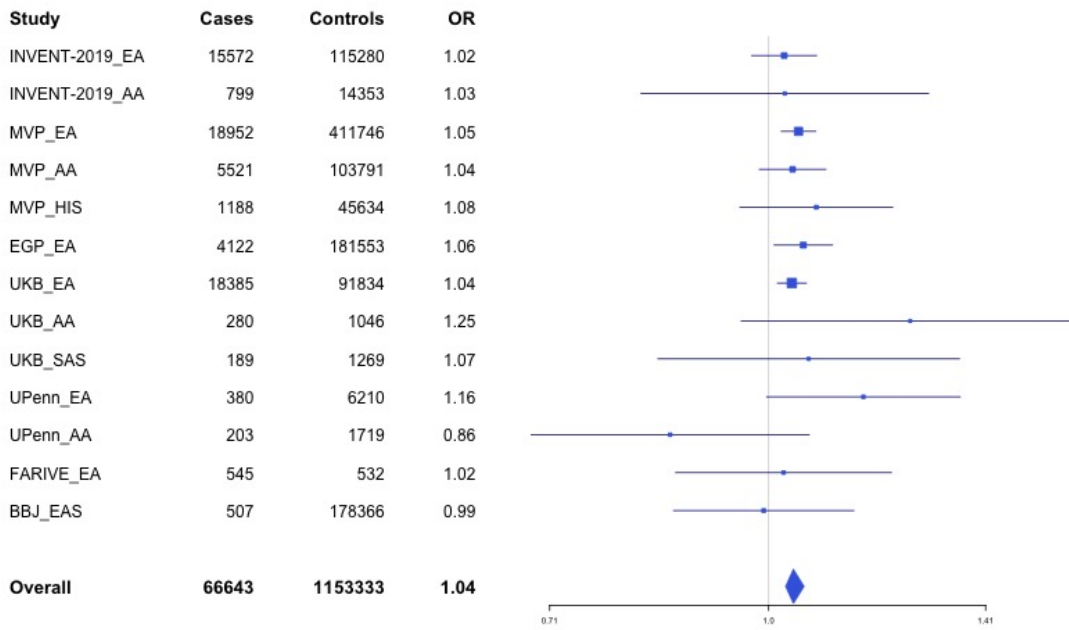

Supplementary Figure 2.12 – rs2842700 (chr1:207282149) in locus 13 (C4BPA)

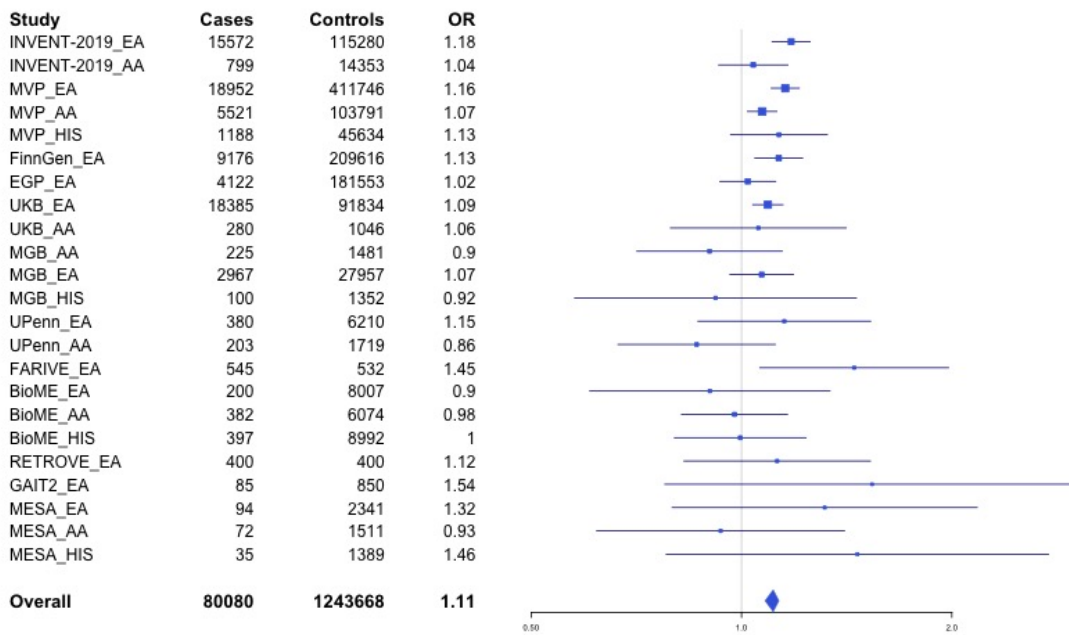

Supplementary Figure 2.13 – rs3811444 (chr1:248039451) in locus 14 (TRIM58)

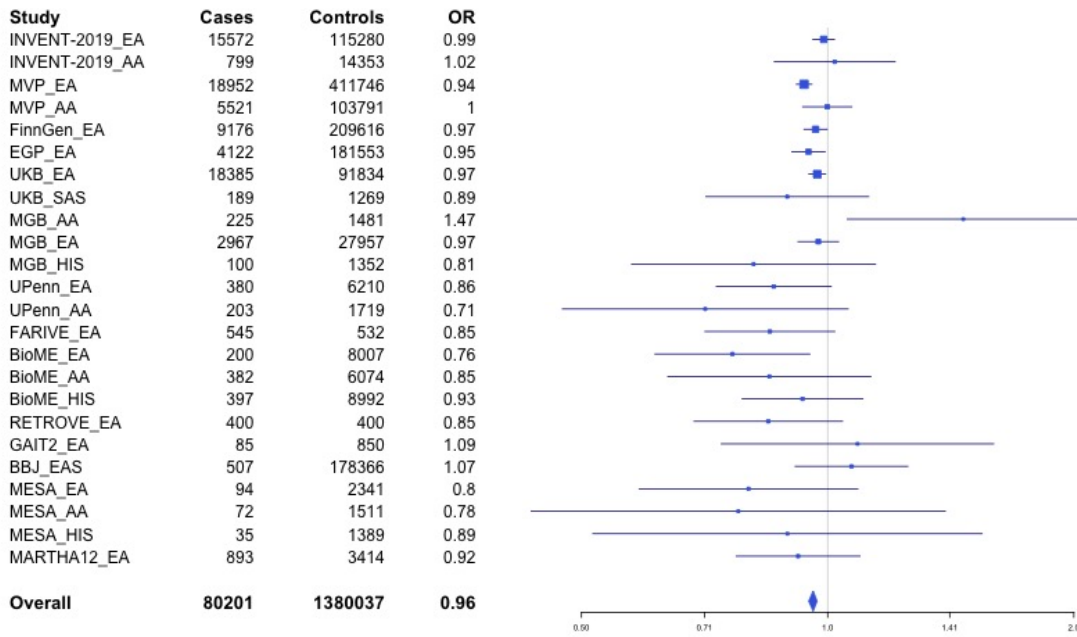

Supplementary Figure 2.14 – rs78475244 (chr2:65086804) in locus 16 (LINC01800)

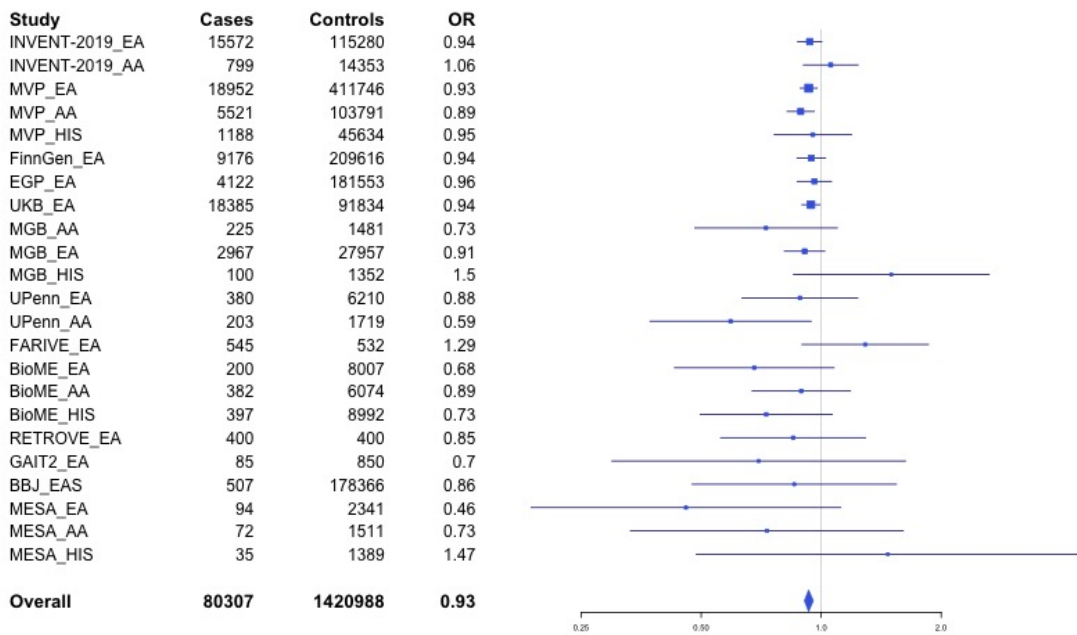

Supplementary Figure 2.15 – rs1867312 (chr2:68619981) in locus 17 (PLEK)

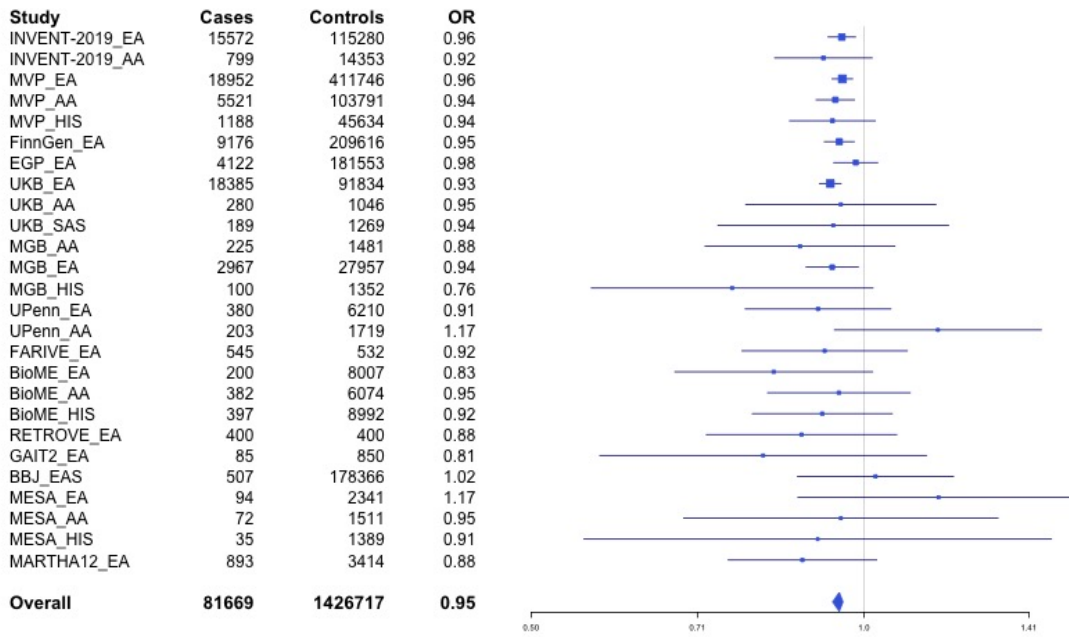

Supplementary Figure 2.16 – rs1518760 (chr2:128140500) in locus 18 (MAP3K2)

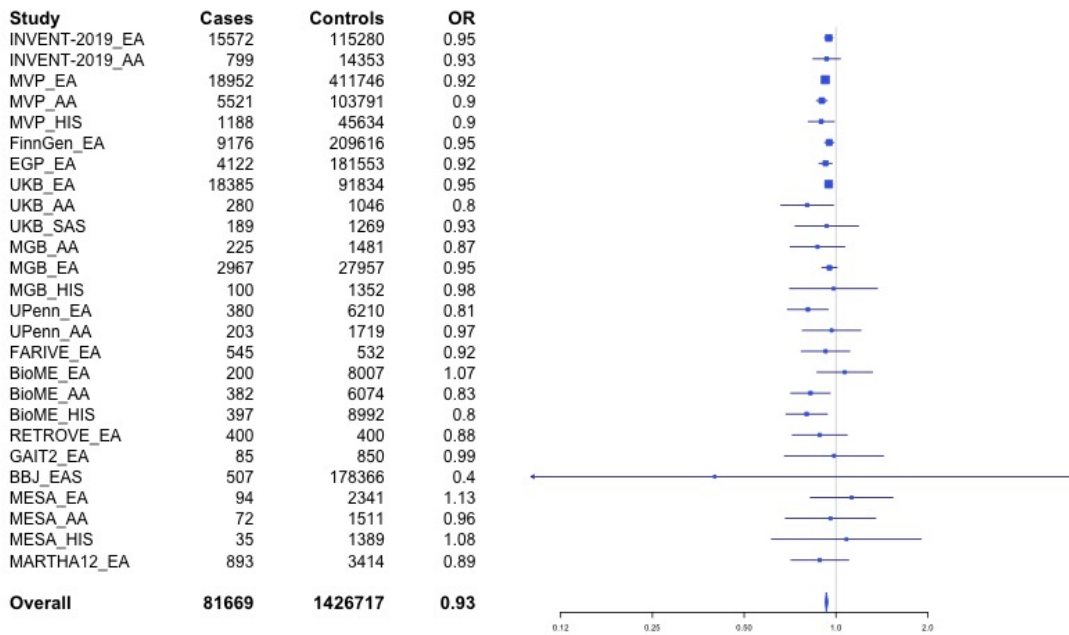

Supplementary Figure 2.17 – rs1912849 (chr2:188310118) in locus 19 (CALCRL)

| Study          | Cases        | Controls       | OR          |
|----------------|--------------|----------------|-------------|
| INVENT-2019_EA | 15572        | 115280         | 1.03        |
| INVENT-2019_AA | 799          | 14353          | 1.01        |
| MVP_EA         | 18952        | 411746         | 1.05        |
| MVP_AA         | 5521         | 103791         | 1.05        |
| MVP_HIS        | 1188         | 45634          | 1.02        |
| FinnGen_EA     | 9176         | 209616         | 1.02        |
| EGP_EA         | 4122         | 181553         | 1.04        |
| UKB_EA         | 18385        | 91834          | 1.03        |
| UKB_AA         | 280          | 1046           | 0.96        |
| UKB_SAS        | 189          | 1269           | 1.18        |
| MGB_AA         | 225          | 1481           | 1.29        |
| MGB_EA         | 2967         | 27957          | 1.04        |
| MGB_HIS        | 100          | 1352           | 1.2         |
| UPenn_EA       | 380          | 6210           | 1.04        |
| UPenn_AA       | 203          | 1719           | 1.12        |
| FARIVE_EA      | 545          | 532            | 1.01        |
| BioME_EA       | 200          | 8007           | 1.12        |
| BioME_AA       | 382          | 6074           | 1.14        |
| BioME_HIS      | 397          | 8992           | 1.1         |
| RETROVE_EA     | 400          | 400            | 1.19        |
| GAIT2_EA       | 85           | 850            | 1.18        |
| BBJ_EAS        | 507          | 178366         | 1.05        |
| MESA_EA        | 94           | 2341           | 1.19        |
| MESA_AA        | 72           | 1511           | 1.05        |
| MESA_HIS       | 35           | 1389           | 0.77        |
| MARTHA12_EA    | 893          | 3414           | 1.08        |
| <b>Overall</b> | <b>81669</b> | <b>1426717</b> | <b>1.04</b> |

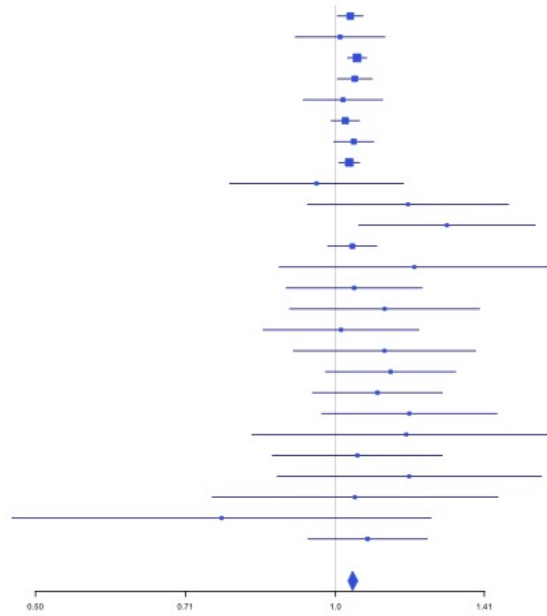

Supplementary Figure 2.18 – rs78872368 (chr2:198545250) in locus 20 (RFTN2;MARS2)

| Study          | Cases        | Controls       | OR          |
|----------------|--------------|----------------|-------------|
| INVENT-2019_EA | 15572        | 115280         | 0.95        |
| INVENT-2019_AA | 799          | 14353          | 0.84        |
| MVP_EA         | 18952        | 411746         | 0.96        |
| MVP_AA         | 5521         | 103791         | 1.06        |
| MVP_HIS        | 1188         | 45634          | 0.98        |
| FinnGen_EA     | 9176         | 209616         | 0.96        |
| EGP_EA         | 4122         | 181553         | 0.97        |
| UKB_EA         | 18385        | 91834          | 0.96        |
| MGB_AA         | 225          | 1481           | 0.99        |
| MGB_EA         | 2967         | 27957          | 0.95        |
| MGB_HIS        | 100          | 1352           | 1.08        |
| UPenn_EA       | 380          | 6210           | 0.84        |
| UPenn_AA       | 203          | 1719           | 0.87        |
| FARIVE_EA      | 545          | 532            | 1.01        |
| BioME_EA       | 200          | 8007           | 0.97        |
| BioME_AA       | 382          | 6074           | 1           |
| BioME_HIS      | 397          | 8992           | 0.79        |
| RETROVE_EA     | 400          | 400            | 0.95        |
| GAIT2_EA       | 85           | 850            | 0.85        |
| MESA_EA        | 94           | 2341           | 0.88        |
| MESA_AA        | 72           | 1511           | 0.89        |
| MESA_HIS       | 35           | 1389           | 0.79        |
| MARTHA12_EA    | 893          | 3414           | 0.98        |
| <b>Overall</b> | <b>80693</b> | <b>1246036</b> | <b>0.96</b> |

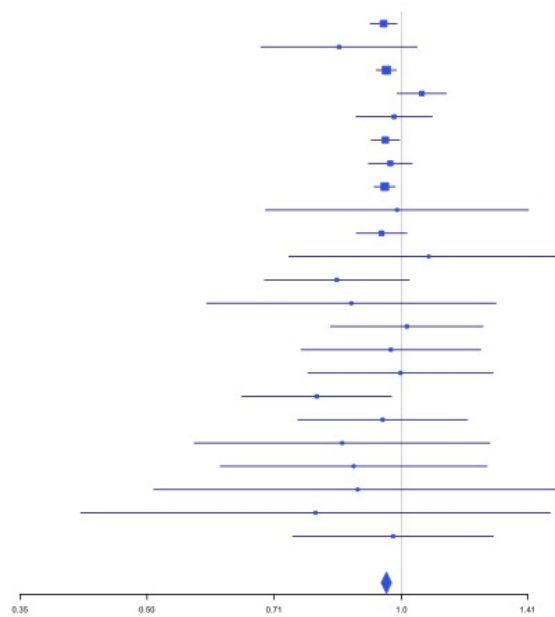

Supplementary Figure 2.19 – rs715 (chr2:211543055) in locus 21 (CPS1)

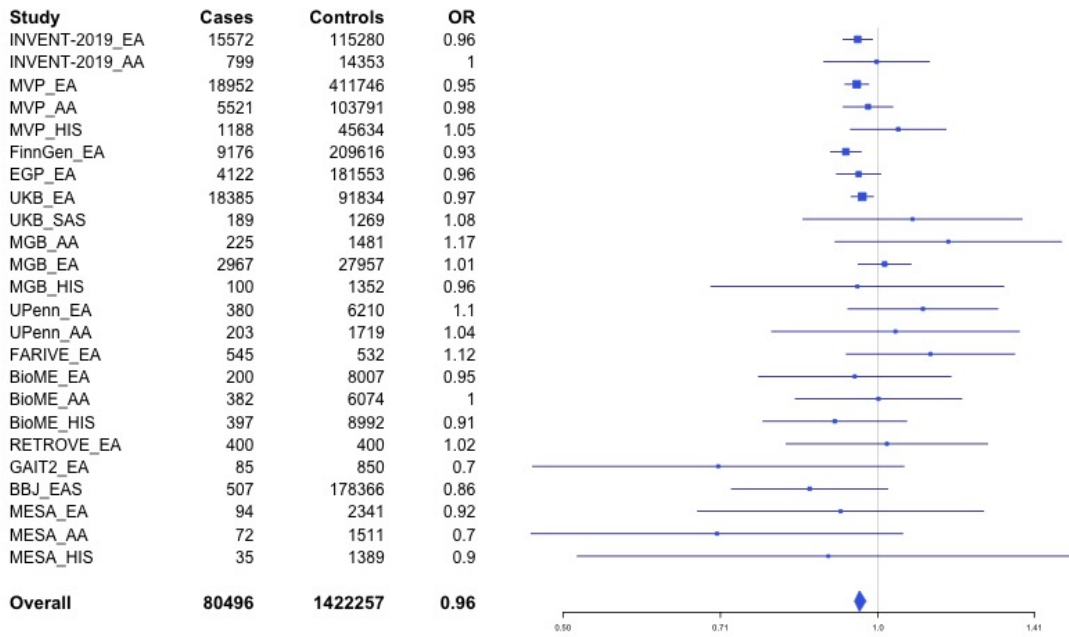

Supplementary Figure 2.20 – rs68066031 (chr2:224880498) in locus 22 (SERPINE2)

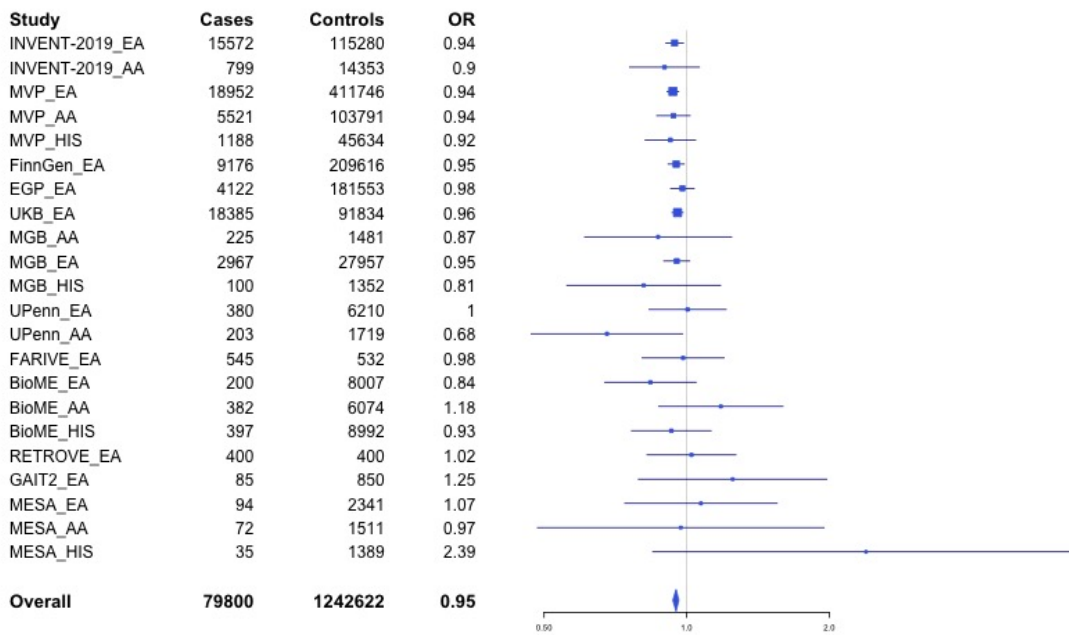

Supplementary Figure 2.21 – rs13084580 (chr3:39188182) in locus 24 (CSRNP1)

| Study          | Cases        | Controls       | OR          |
|----------------|--------------|----------------|-------------|
| INVENT-2019_EA | 15572        | 115280         | 1.08        |
| INVENT-2019_AA | 799          | 14353          | 1.07        |
| MVP_EA         | 18952        | 411746         | 1.1         |
| MVP_AA         | 5521         | 103791         | 1.08        |
| MVP_HIS        | 1188         | 45634          | 1.01        |
| FinnGen_EA     | 9176         | 209616         | 1.12        |
| EGP_EA         | 4122         | 181553         | 1.05        |
| UKB_EA         | 18385        | 91834          | 1.05        |
| MGB_AA         | 225          | 1481           | 1.02        |
| MGB_EA         | 2967         | 27957          | 1.07        |
| MGB_HIS        | 100          | 1352           | 1.13        |
| UPenn_EA       | 380          | 6210           | 1.02        |
| UPenn_AA       | 203          | 1719           | 1.01        |
| FARIVE_EA      | 545          | 532            | 1.32        |
| BioME_EA       | 200          | 8007           | 1.09        |
| BioME_AA       | 382          | 6074           | 1.18        |
| BioME_HIS      | 397          | 8992           | 0.99        |
| RETROVE_EA     | 400          | 400            | 1.44        |
| GAIT2_EA       | 85           | 850            | 0.98        |
| BBJ_EAS        | 507          | 178366         | 0.88        |
| MESA_EA        | 94           | 2341           | 1.04        |
| MESA_AA        | 72           | 1511           | 1.59        |
| MESA_HIS       | 35           | 1389           | 0.78        |
| MARTHA12_EA    | 893          | 3414           | 1.2         |
| <b>Overall</b> | <b>81200</b> | <b>1424402</b> | <b>1.08</b> |

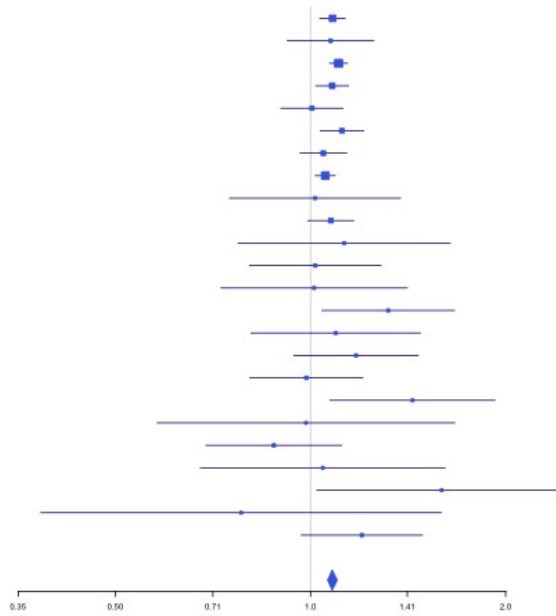

Supplementary Figure 2.22 – rs11130326 (chr3:52771920) in locus 25 (NEK4)

| Study          | Cases        | Controls      | OR          |
|----------------|--------------|---------------|-------------|
| INVENT-2019_EA | 15572        | 115280        | 1.05        |
| INVENT-2019_AA | 799          | 14353         | 0.93        |
| MVP_EA         | 18952        | 411746        | 1.04        |
| MVP_AA         | 5521         | 103791        | 1.05        |
| MVP_HIS        | 1188         | 45634         | 0.96        |
| FinnGen_EA     | 9176         | 209616        | 1.05        |
| UPenn_EA       | 380          | 6210          | 0.94        |
| UPenn_AA       | 203          | 1719          | 1.08        |
| FARIVE_EA      | 545          | 532           | 0.95        |
| MESA_AA        | 72           | 1511          | 1.13        |
| MESA_HIS       | 35           | 1389          | 0.93        |
| MARTHA12_EA    | 893          | 3414          | 0.99        |
| <b>Overall</b> | <b>53336</b> | <b>915195</b> | <b>1.04</b> |

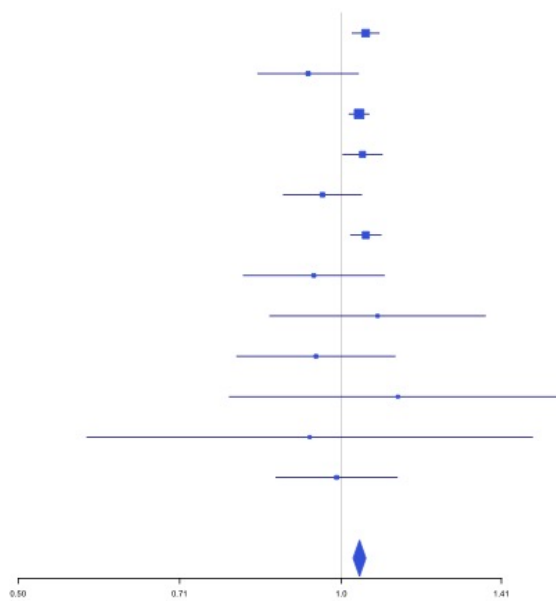

Supplementary Figure 2.23 – rs529326506 (chr3:90503764) in locus 26 (EPHA3;NONE)

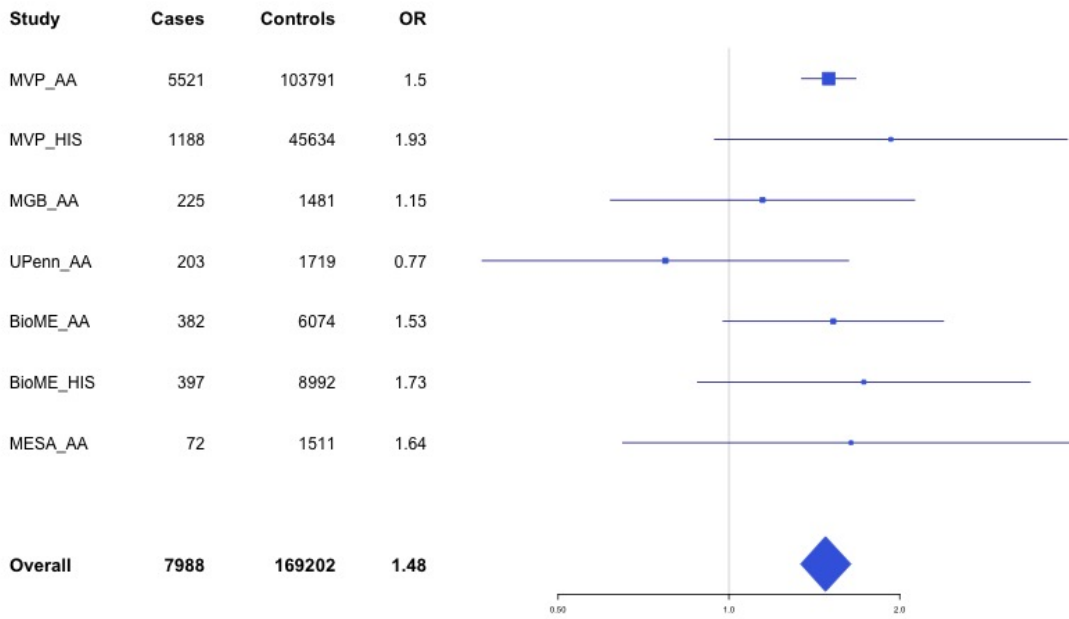

Supplementary Figure 2.24 – rs28479320 (chr3:93752529) in locus 27 (ARL13B)

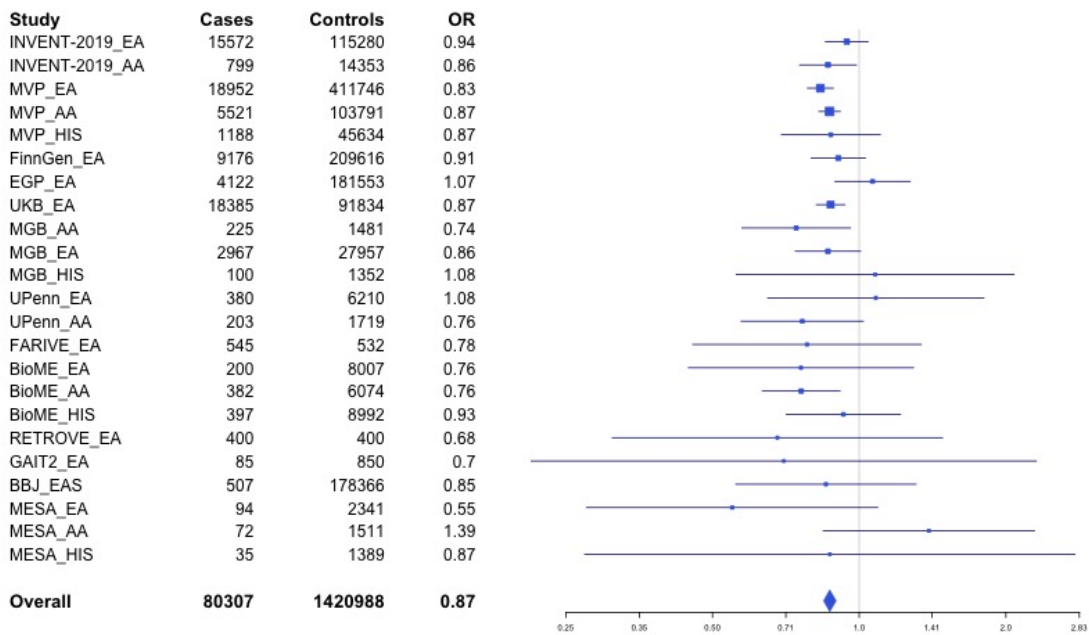



Supplementary Figure 2.25 – rs900399 (chr3:156798732) in locus 30 (LINC02029;LINC00880)

| Study          | Cases        | Controls       | OR          |
|----------------|--------------|----------------|-------------|
| INVENT-2019_EA | 15572        | 115280         | 1.04        |
| INVENT-2019_AA | 799          | 14353          | 0.98        |
| MVP_EA         | 18952        | 411746         | 1.03        |
| MVP_AA         | 5521         | 103791         | 1.04        |
| MVP_HIS        | 1188         | 45634          | 1.07        |
| FinnGen_EA     | 9176         | 209616         | 1.06        |
| EGP_EA         | 4122         | 181553         | 1.03        |
| UKB_EA         | 18385        | 91834          | 1.03        |
| UKB_AA         | 280          | 1046           | 1.13        |
| UKB_SAS        | 189          | 1269           | 1.08        |
| MGB_AA         | 225          | 1481           | 0.92        |
| MGB_EA         | 2967         | 27957          | 1.07        |
| MGB_HIS        | 100          | 1352           | 1.12        |
| UPenn_EA       | 380          | 6210           | 1.04        |
| UPenn_AA       | 203          | 1719           | 1           |
| FARIVE_EA      | 545          | 532            | 1           |
| BioME_EA       | 200          | 8007           | 1.09        |
| BioME_AA       | 382          | 6074           | 1.07        |
| BioME_HIS      | 397          | 8992           | 0.93        |
| RETROVE_EA     | 400          | 400            | 1.01        |
| GAIT2_EA       | 85           | 850            | 1.2         |
| BBJ_EAS        | 507          | 178366         | 1.05        |
| MESA_EA        | 94           | 2341           | 1.21        |
| MESA_AA        | 72           | 1511           | 1.11        |
| MESA_HIS       | 35           | 1389           | 1.01        |
| MARTHA12_EA    | 893          | 3414           | 1.11        |
| <b>Overall</b> | <b>81669</b> | <b>1426717</b> | <b>1.04</b> |

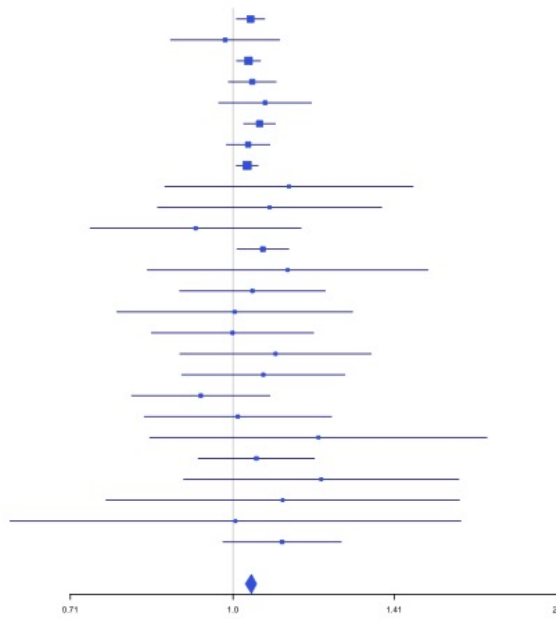

Supplementary Figure 2.26 – rs710446 (chr3:186459927) in locus 32 (KNG1)

| Study          | Cases        | Controls       | OR          |
|----------------|--------------|----------------|-------------|
| INVENT-2019_EA | 15572        | 115280         | 0.94        |
| INVENT-2019_AA | 799          | 14353          | 0.95        |
| MVP_EA         | 18952        | 411746         | 0.97        |
| MVP_AA         | 5521         | 103791         | 0.98        |
| MVP_HIS        | 1188         | 45634          | 0.95        |
| FinnGen_EA     | 9176         | 209616         | 0.94        |
| EGP_EA         | 4122         | 181553         | 0.96        |
| UKB_EA         | 18385        | 91834          | 0.96        |
| UKB_AA         | 280          | 1046           | 1.08        |
| UKB_SAS        | 189          | 1269           | 0.97        |
| MGB_AA         | 225          | 1481           | 0.9         |
| MGB_EA         | 2967         | 27957          | 0.95        |
| MGB_HIS        | 100          | 1352           | 1.06        |
| UPenn_EA       | 380          | 6210           | 0.91        |
| UPenn_AA       | 203          | 1719           | 1.03        |
| FARIVE_EA      | 545          | 532            | 0.83        |
| BioME_EA       | 200          | 8007           | 1.04        |
| BioME_AA       | 382          | 6074           | 1.08        |
| BioME_HIS      | 397          | 8992           | 0.96        |
| RETROVE_EA     | 400          | 400            | 0.86        |
| GAIT2_EA       | 85           | 850            | 1.04        |
| BBJ_EAS        | 507          | 178366         | 0.98        |
| MESA_EA        | 94           | 2341           | 1.15        |
| MESA_AA        | 72           | 1511           | 1.34        |
| MESA_HIS       | 35           | 1389           | 1.01        |
| MARTHA12_EA    | 893          | 3414           | 0.85        |
| <b>Overall</b> | <b>81669</b> | <b>1426717</b> | <b>0.96</b> |

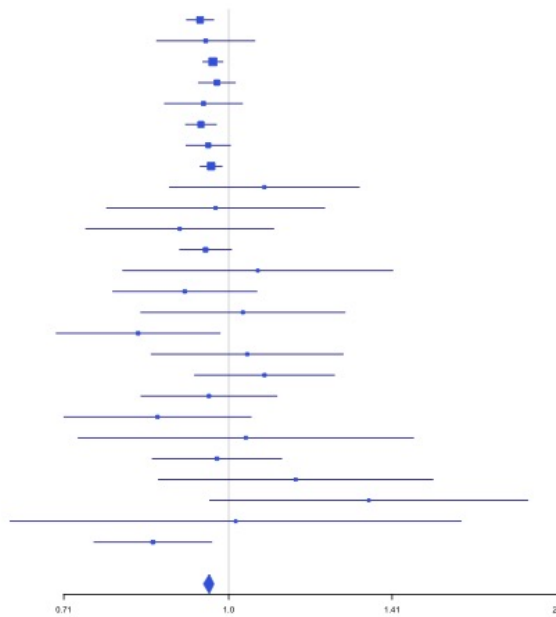

Supplementary Figure 2.27 – rs3796159 (chr3:194790434) in locus 33 (XXYL1)

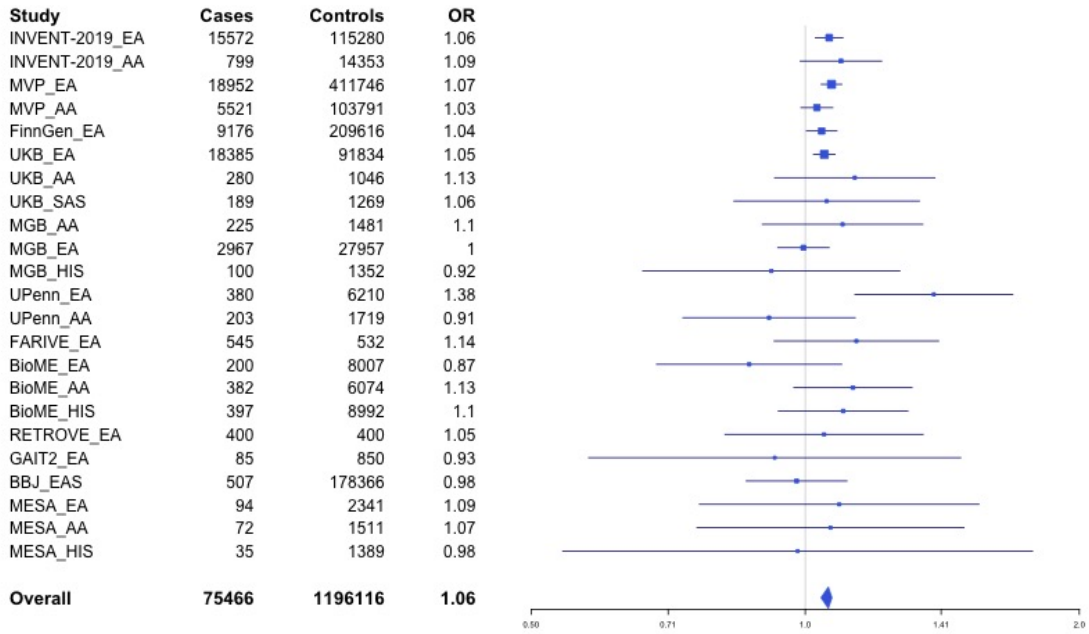

Supplementary Figure 2.28 – rs9654093 (chr4:7903763) in locus 34 (AFAP1)

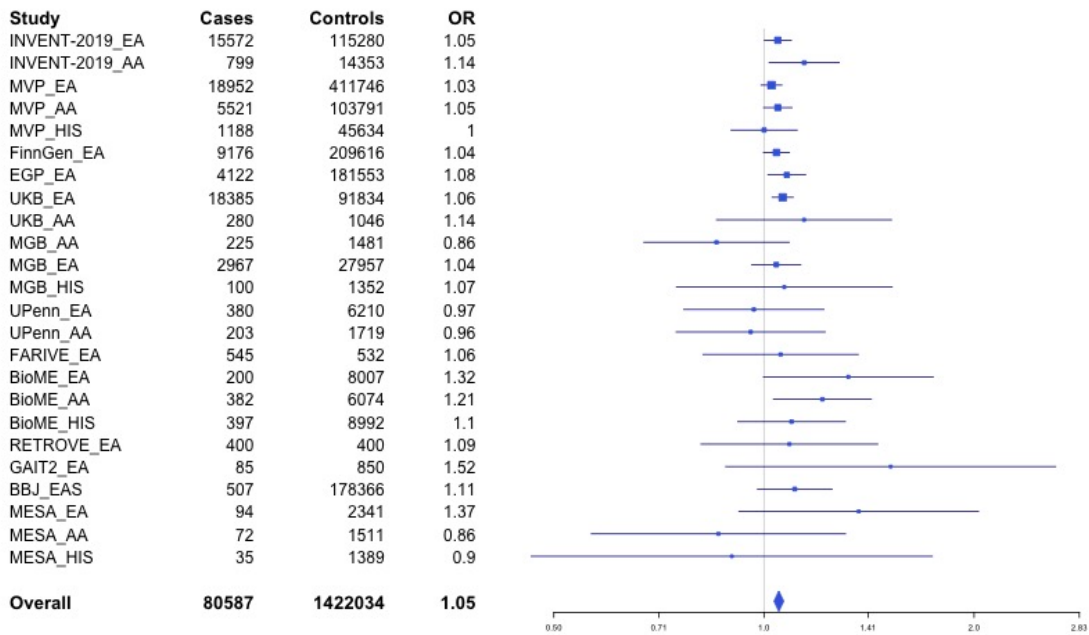

Supplementary Figure 2.29 – rs781656 (chr4:57778645) in locus 35 (REST)

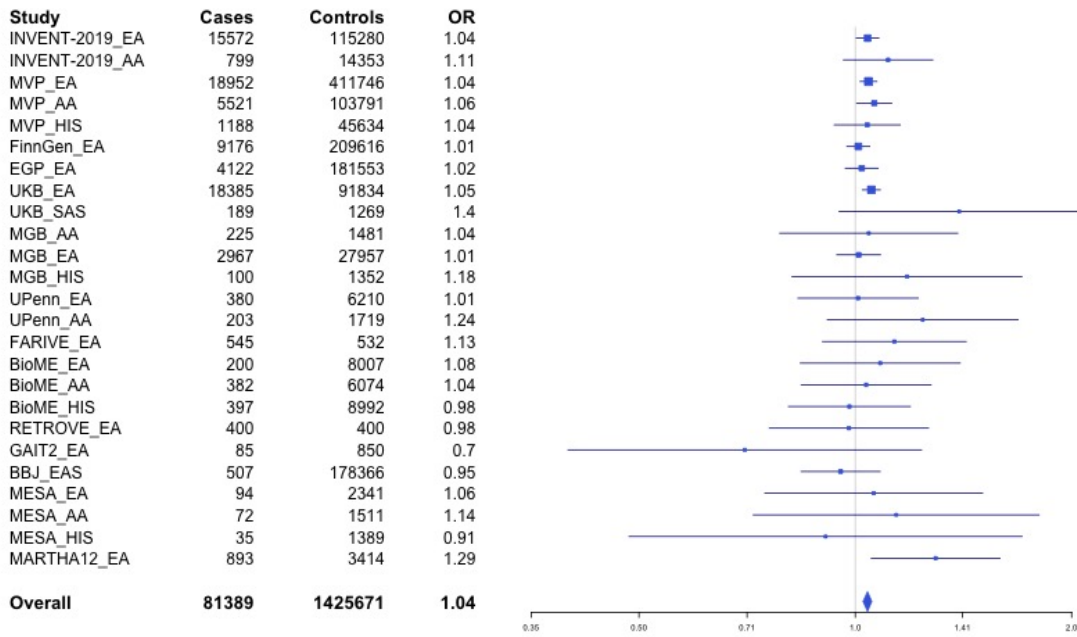

Supplementary Figure 2.30 – rs6826579 (chr4:83785031) in locus 36 (SEC31A)

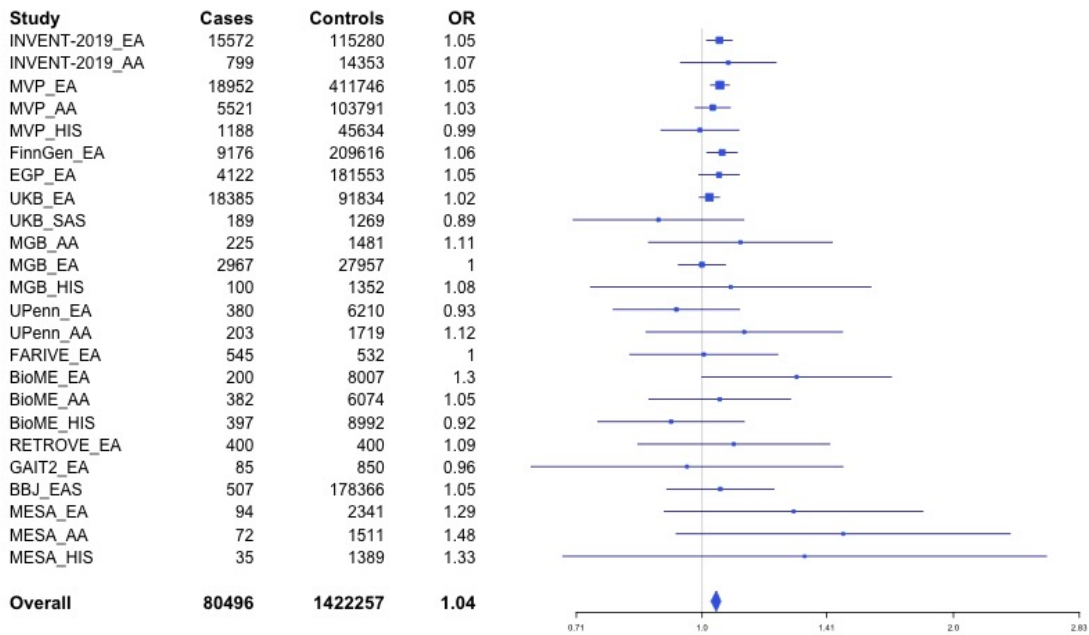

Supplementary Figure 2.31 – rs2014912 (chr4:86715670) in locus 37 (ARHGAP24)

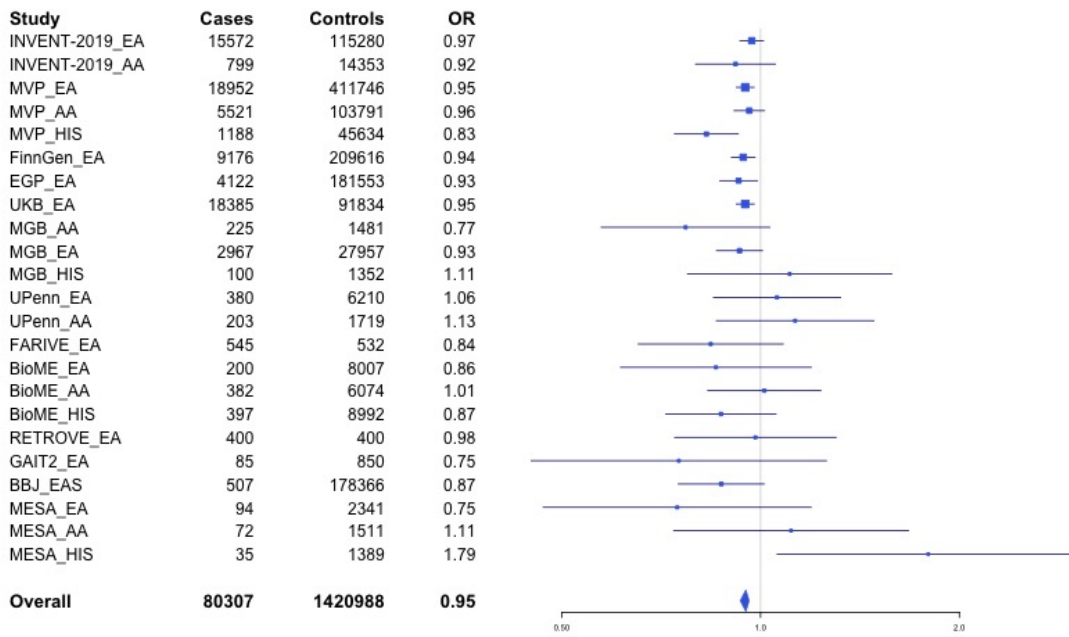

Supplementary Figure 2.32 – rs2066864 (chr4:155525695) in locus 39 (FGG)

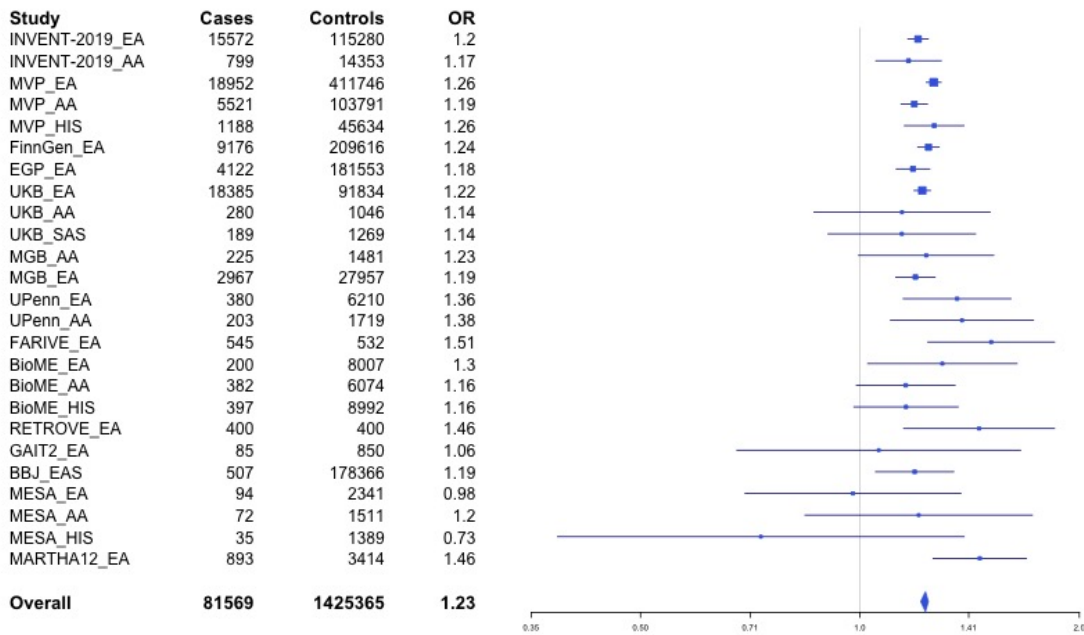

Supplementary Figure 2.33 – rs3756011 (chr4:187206249) in locus 40 (F11)

| Study          | Cases        | Controls       | OR          |
|----------------|--------------|----------------|-------------|
| INVENT-2019_EA | 15572        | 115280         | 1.2         |
| INVENT-2019_AA | 799          | 14353          | 1.15        |
| MVP_EA         | 18952        | 411746         | 1.26        |
| MVP_AA         | 5521         | 103791         | 1.18        |
| MVP_HIS        | 1188         | 45634          | 1.2         |
| FinnGen_EA     | 9176         | 209616         | 1.23        |
| EGP_EA         | 4122         | 181553         | 1.25        |
| UKB_EA         | 18385        | 91834          | 1.18        |
| UKB_AA         | 280          | 1046           | 1.17        |
| UKB_SAS        | 189          | 1269           | 1.01        |
| MGB_AA         | 225          | 1481           | 1.3         |
| MGB_EA         | 2967         | 27957          | 1.18        |
| MGB_HIS        | 100          | 1352           | 0.95        |
| UPenn_EA       | 380          | 6210           | 1.19        |
| UPenn_AA       | 203          | 1719           | 1.05        |
| FARIVE_EA      | 545          | 532            | 1.47        |
| BioME_EA       | 200          | 8007           | 1.03        |
| BioME_AA       | 382          | 6074           | 1.12        |
| BioME_HIS      | 397          | 8992           | 1.14        |
| RETROVE_EA     | 400          | 400            | 1.4         |
| GAIT2_EA       | 85           | 850            | 1.53        |
| BBJ_EAS        | 507          | 178366         | 1.14        |
| MESA_EA        | 94           | 2341           | 0.99        |
| MESA_AA        | 72           | 1511           | 1.17        |
| MESA_HIS       | 35           | 1389           | 1.22        |
| <b>Overall</b> | <b>80776</b> | <b>1423303</b> | <b>1.21</b> |

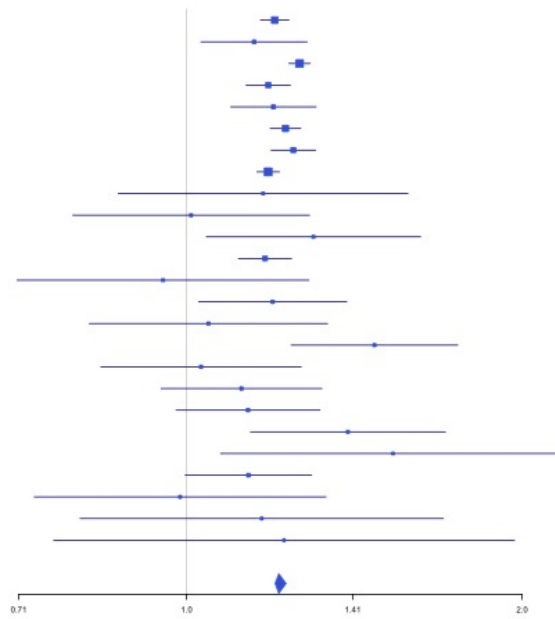

Supplementary Figure 2.34 – rs16867574 (chr5:38708554) in locus 42 (OSMR-AS1)

| Study          | Cases        | Controls       | OR          |
|----------------|--------------|----------------|-------------|
| INVENT-2019_EA | 15572        | 115280         | 0.93        |
| INVENT-2019_AA | 799          | 14353          | 1.14        |
| MVP_EA         | 18952        | 411746         | 0.95        |
| MVP_AA         | 5521         | 103791         | 0.94        |
| MVP_HIS        | 1188         | 45634          | 0.95        |
| FinnGen_EA     | 9176         | 209616         | 0.99        |
| EGP_EA         | 4122         | 181553         | 0.93        |
| UKB_EA         | 18385        | 91834          | 0.95        |
| UKB_SAS        | 189          | 1269           | 0.96        |
| MGB_AA         | 225          | 1481           | 1.02        |
| MGB_EA         | 2967         | 27957          | 0.97        |
| MGB_HIS        | 100          | 1352           | 0.85        |
| UPenn_EA       | 380          | 6210           | 1.01        |
| UPenn_AA       | 203          | 1719           | 0.85        |
| FARIVE_EA      | 545          | 532            | 0.95        |
| BioME_EA       | 200          | 8007           | 0.96        |
| BioME_AA       | 382          | 6074           | 0.95        |
| BioME_HIS      | 397          | 8992           | 1.05        |
| RETROVE_EA     | 400          | 400            | 0.86        |
| GAIT2_EA       | 85           | 850            | 1.37        |
| BBJ_EAS        | 507          | 178366         | 0.98        |
| MESA_EA        | 94           | 2341           | 1.13        |
| MESA_AA        | 72           | 1511           | 0.96        |
| MESA_HIS       | 35           | 1389           | 0.8         |
| <b>Overall</b> | <b>80496</b> | <b>1422257</b> | <b>0.95</b> |

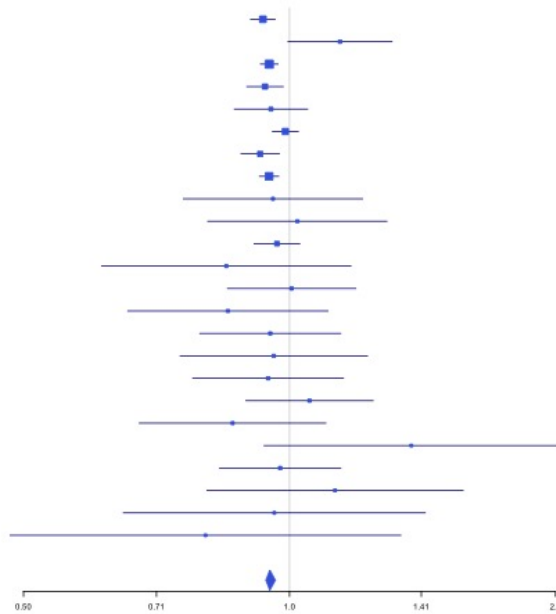

Supplementary Figure 2.35 – rs7730244 (chr5:72957088) in locus 43 (ARHGEF28)

| Study          | Cases        | Controls       | OR          |
|----------------|--------------|----------------|-------------|
| INVENT-2019_EA | 15572        | 115280         | 0.98        |
| INVENT-2019_AA | 799          | 14353          | 0.95        |
| MVP_EA         | 18952        | 411746         | 0.96        |
| MVP_AA         | 5521         | 103791         | 0.98        |
| MVP_HIS        | 1188         | 45634          | 0.93        |
| FinnGen_EA     | 9176         | 209616         | 0.95        |
| EGP_EA         | 4122         | 181553         | 0.98        |
| UKB_EA         | 18385        | 91834          | 0.97        |
| UKB_AA         | 280          | 1046           | 1.15        |
| UKB_SAS        | 189          | 1269           | 0.89        |
| MGB_AA         | 225          | 1481           | 1.03        |
| MGB_EA         | 2967         | 27957          | 1           |
| UPenn_EA       | 380          | 6210           | 1.02        |
| UPenn_AA       | 203          | 1719           | 1.02        |
| FARIVE_EA      | 545          | 532            | 0.9         |
| BioME_EA       | 200          | 8007           | 1.02        |
| BioME_AA       | 382          | 6074           | 0.86        |
| BioME_HIS      | 397          | 8992           | 1           |
| RETROVE_EA     | 400          | 400            | 1.06        |
| GAIT2_EA       | 85           | 850            | 1.18        |
| BBJ_EAS        | 507          | 178366         | 0.89        |
| MESA_EA        | 94           | 2341           | 1.19        |
| MESA_AA        | 72           | 1511           | 1.03        |
| MESA_HIS       | 35           | 1389           | 1.35        |
| <b>Overall</b> | <b>80676</b> | <b>1421951</b> | <b>0.97</b> |

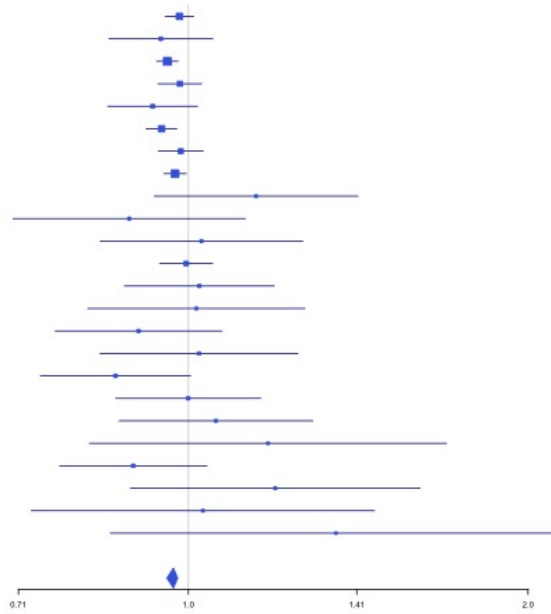

Supplementary Figure 2.36 – rs750465397 (chr5:96289036) in locus 44 (LNPEP)

| Study          | Cases        | Controls       | OR          |
|----------------|--------------|----------------|-------------|
| INVENT-2019_EA | 15572        | 115280         | 0.97        |
| INVENT-2019_AA | 799          | 14353          | 1.05        |
| MVP_EA         | 18952        | 411746         | 0.96        |
| MVP_AA         | 5521         | 103791         | 0.96        |
| MVP_HIS        | 1188         | 45634          | 0.97        |
| FinnGen_EA     | 9176         | 209616         | 0.96        |
| EGP_EA         | 4122         | 181553         | 0.97        |
| UKB_EA         | 18385        | 91834          | 0.97        |
| UKB_AA         | 280          | 1046           | 1.03        |
| UKB_SAS        | 189          | 1269           | 1           |
| MGB_AA         | 225          | 1481           | 1.07        |
| MGB_EA         | 2967         | 27957          | 0.98        |
| MGB_HIS        | 100          | 1352           | 0.87        |
| UPenn_EA       | 380          | 6210           | 1.16        |
| UPenn_AA       | 203          | 1719           | 0.77        |
| FARIVE_EA      | 545          | 532            | 0.97        |
| BioME_EA       | 200          | 8007           | 1.07        |
| BioME_AA       | 382          | 6074           | 1           |
| BioME_HIS      | 397          | 8992           | 0.99        |
| BBJ_EAS        | 507          | 178366         | 1.01        |
| MARTHA12_EA    | 893          | 3414           | 0.81        |
| <b>Overall</b> | <b>80983</b> | <b>1420226</b> | <b>0.97</b> |

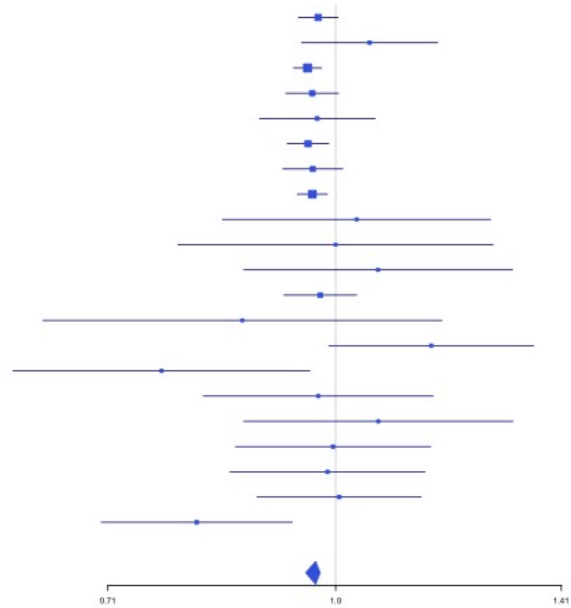

Supplementary Figure 2.37 – rs147133967 (chr5:132426851) in locus 45 (HSPA4)

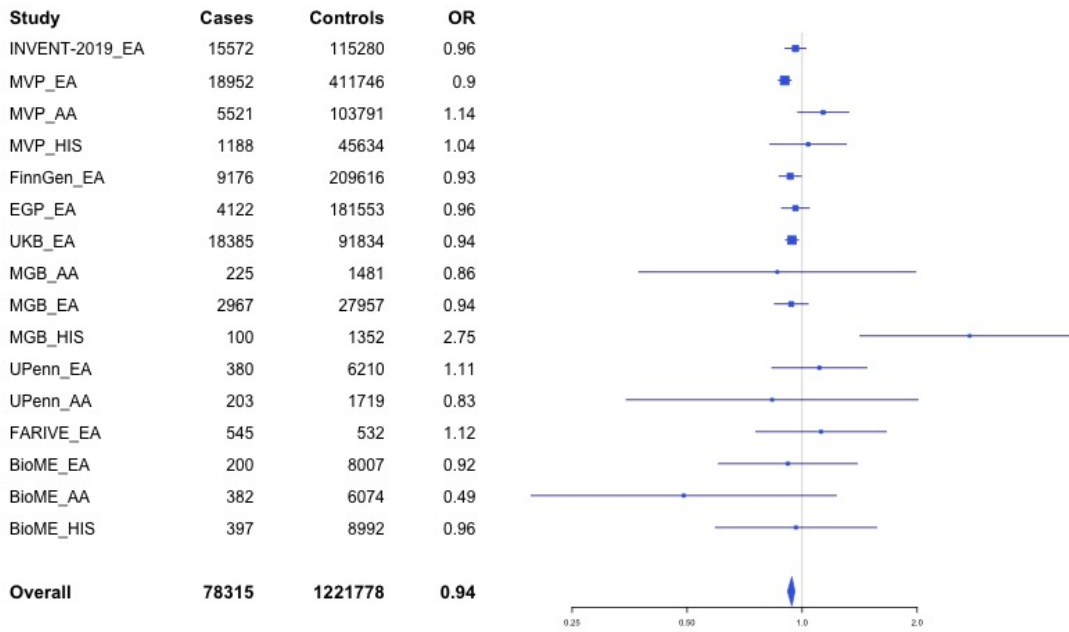

Supplementary Figure 2.38 – rs214059 (chr6:25536937) in locus 46 (CARMIL1)

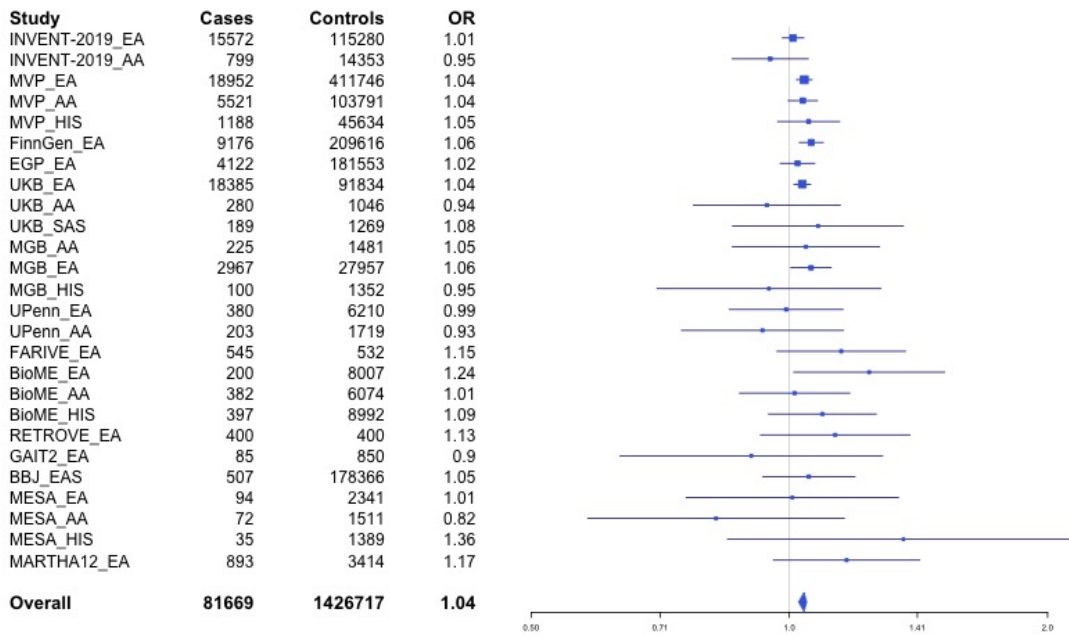



Supplementary Figure 2.39 – rs2394251 (chr6:29943688) in locus 47 (HCG9)

| Study          | Cases        | Controls       | OR          |
|----------------|--------------|----------------|-------------|
| INVENT-2019_EA | 15572        | 115280         | 0.97        |
| INVENT-2019_AA | 799          | 14353          | 1.04        |
| MVP_EA         | 18952        | 411746         | 0.94        |
| MVP_AA         | 5521         | 103791         | 1.01        |
| MVP_HIS        | 1188         | 45634          | 0.94        |
| FinnGen_EA     | 9176         | 209616         | 0.98        |
| EGP_EA         | 4122         | 181553         | 0.95        |
| UKB_EA         | 18385        | 91834          | 0.97        |
| UKB_AA         | 280          | 1046           | 0.75        |
| UKB_SAS        | 189          | 1269           | 0.98        |
| MGB_AA         | 225          | 1481           | 0.83        |
| MGB_EA         | 2967         | 27957          | 0.96        |
| MGB_HIS        | 100          | 1352           | 0.92        |
| UPenn_EA       | 380          | 6210           | 0.84        |
| UPenn_AA       | 203          | 1719           | 0.94        |
| FARIVE_EA      | 545          | 532            | 0.96        |
| RETROVE_EA     | 400          | 400            | 0.92        |
| GAIT2_EA       | 85           | 850            | 0.91        |
| BBJ_EAS        | 507          | 178366         | 0.85        |
| MESA_EA        | 94           | 2341           | 0.84        |
| MESA_AA        | 72           | 1511           | 1.62        |
| MESA_HIS       | 35           | 1389           | 0.99        |
| MARTHA12_EA    | 893          | 3414           | 1.07        |
| <b>Overall</b> | <b>80690</b> | <b>1403644</b> | <b>0.96</b> |

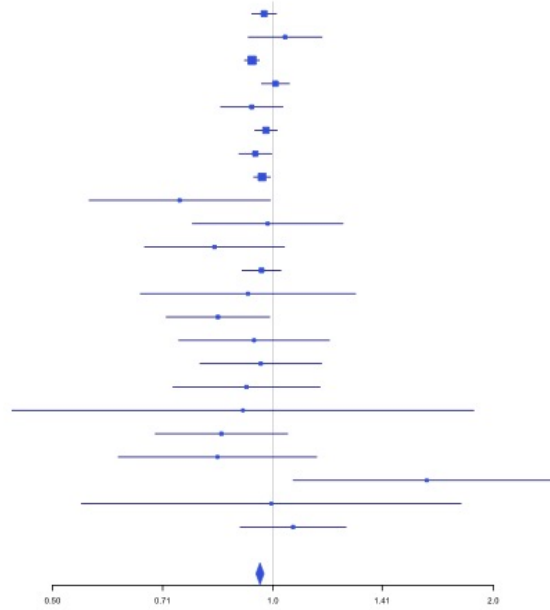

Supplementary Figure 2.40 – rs9268863 (chr6:32430289) in locus 48 (HLA-DRA ;HLA-DRB5)

| Study          | Cases        | Controls       | OR          |
|----------------|--------------|----------------|-------------|
| INVENT-2019_EA | 15572        | 115280         | 1.05        |
| INVENT-2019_AA | 799          | 14353          | 1.04        |
| MVP_EA         | 18952        | 411746         | 1.06        |
| MVP_AA         | 5521         | 103791         | 1           |
| MVP_HIS        | 1188         | 45634          | 1.01        |
| FinnGen_EA     | 9176         | 209616         | 1.06        |
| EGP_EA         | 4122         | 181553         | 1.02        |
| UKB_EA         | 18385        | 91834          | 1.01        |
| UKB_AA         | 280          | 1046           | 1.12        |
| UKB_SAS        | 189          | 1269           | 1.2         |
| MGB_AA         | 225          | 1481           | 1.14        |
| MGB_EA         | 2967         | 27957          | 1.03        |
| MGB_HIS        | 100          | 1352           | 1.23        |
| UPenn_EA       | 380          | 6210           | 1.03        |
| UPenn_AA       | 203          | 1719           | 0.96        |
| FARIVE_EA      | 545          | 532            | 1.07        |
| BioME_EA       | 200          | 8007           | 1.2         |
| BioME_AA       | 382          | 6074           | 1.02        |
| BioME_HIS      | 397          | 8992           | 1.02        |
| RETROVE_EA     | 400          | 400            | 1.05        |
| GAIT2_EA       | 85           | 850            | 0.74        |
| BBJ_EAS        | 507          | 178366         | 0.97        |
| MESA_EA        | 94           | 2341           | 1.29        |
| MESA_AA        | 72           | 1511           | 0.99        |
| MESA_HIS       | 35           | 1389           | 1.78        |
| MARTHA12_EA    | 893          | 3414           | 1.13        |
| <b>Overall</b> | <b>81669</b> | <b>1426717</b> | <b>1.04</b> |

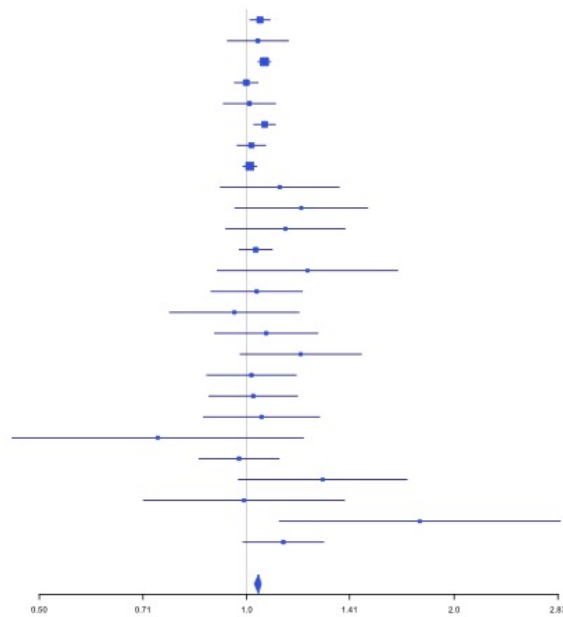

Supplementary Figure 2.41 – rs145294670 (chr6:34622561) in locus 49 (ILRUN)

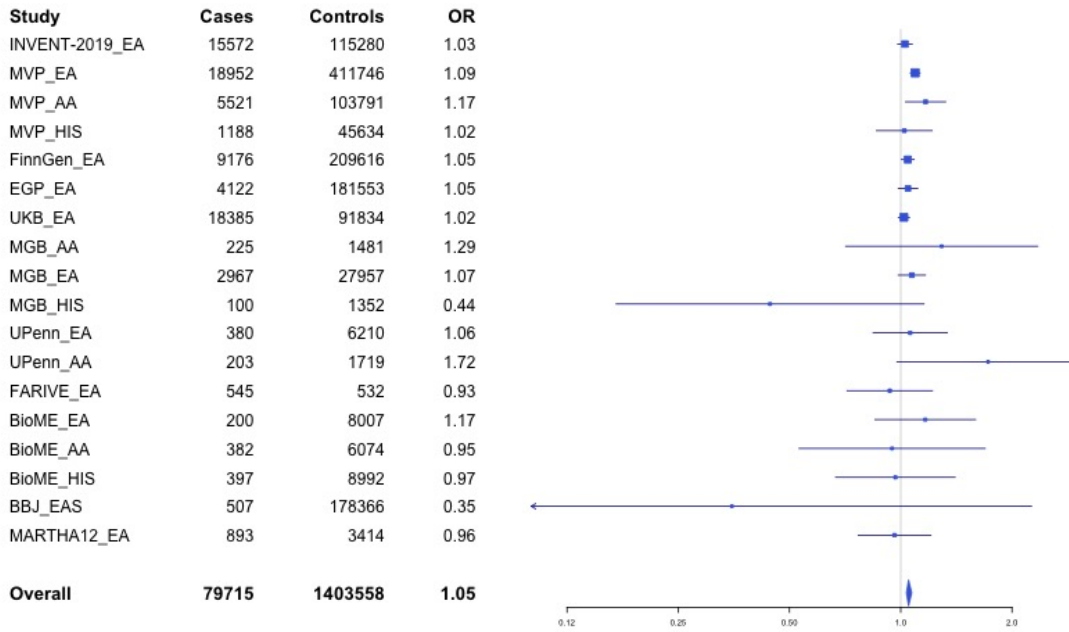

Supplementary Figure 2.42 – rs9386182 (chr6:147691069) in locus 52 (STXBP5)

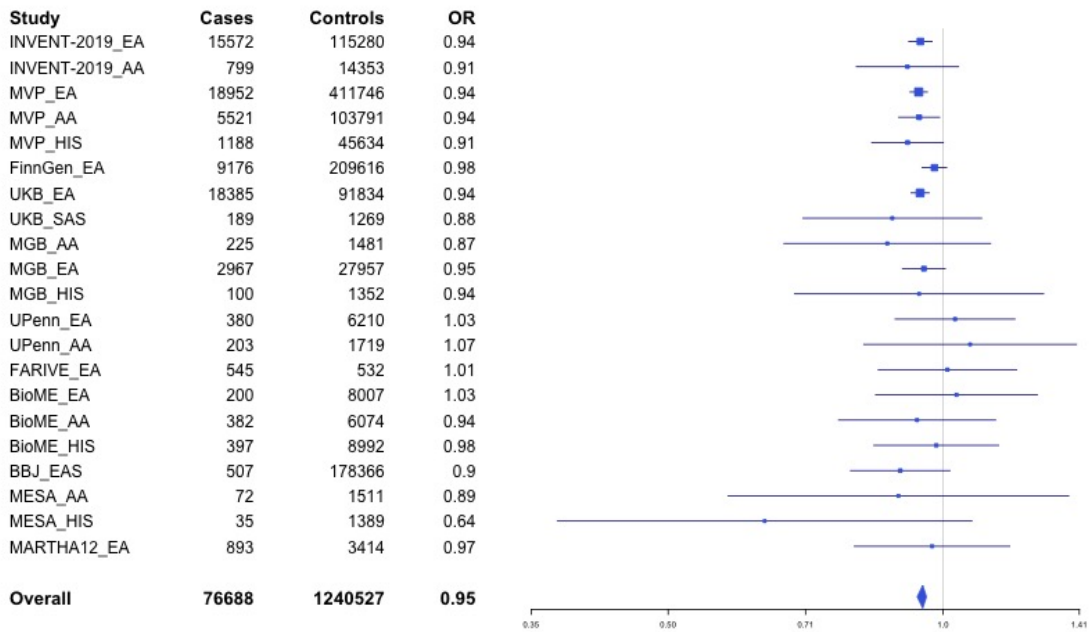

Supplementary Figure 2.43 – rs1513275 (chr7:28259233) in locus 53 (JAZF1-AS1)

| Study          | Cases        | Controls       | OR          |
|----------------|--------------|----------------|-------------|
| INVENT-2019_EA | 15572        | 115280         | 1.05        |
| INVENT-2019_AA | 799          | 14353          | 1           |
| MVP_EA         | 18952        | 411746         | 1.05        |
| MVP_AA         | 5521         | 103791         | 1.03        |
| MVP_HIS        | 1188         | 45634          | 1           |
| FinnGen_EA     | 9176         | 209616         | 1.09        |
| EGP_EA         | 4122         | 181553         | 1.01        |
| UKB_EA         | 18385        | 91834          | 1.05        |
| UKB_AA         | 280          | 1046           | 0.98        |
| UKB_SAS        | 189          | 1269           | 0.89        |
| MGB_AA         | 225          | 1481           | 0.93        |
| MGB_EA         | 2967         | 27957          | 1.02        |
| MGB_HIS        | 100          | 1352           | 0.76        |
| UPenn_EA       | 380          | 6210           | 1.1         |
| UPenn_AA       | 203          | 1719           | 1.14        |
| FARIVE_EA      | 545          | 532            | 1.09        |
| BioME_EA       | 200          | 8007           | 1.13        |
| BioME_AA       | 382          | 6074           | 1.06        |
| BioME_HIS      | 397          | 8992           | 1.03        |
| RETROVE_EA     | 400          | 400            | 1.07        |
| GAIT2_EA       | 85           | 850            | 1.23        |
| BBJ_EAS        | 507          | 178366         | 0.93        |
| MESA_EA        | 94           | 2341           | 1.3         |
| MESA_AA        | 72           | 1511           | 1.08        |
| MESA_HIS       | 35           | 1389           | 0.99        |
| <b>Overall</b> | <b>80776</b> | <b>1423303</b> | <b>1.05</b> |

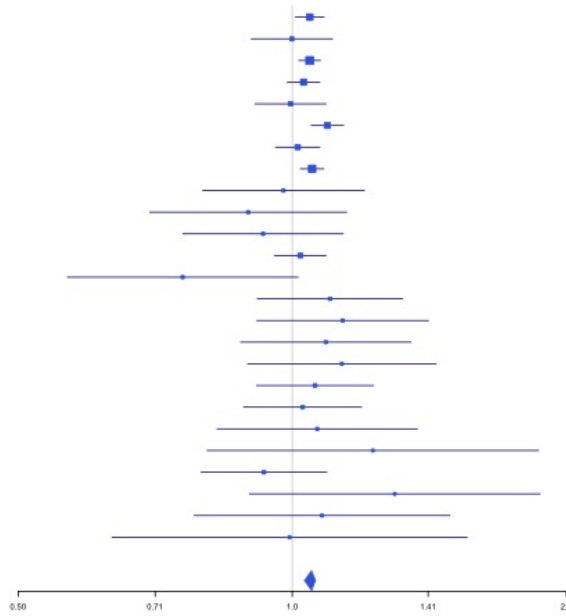

Supplementary Figure 2.44 – rs42038 (chr7:92243719) in locus 54 (CDK6)

| Study          | Cases        | Controls       | OR          |
|----------------|--------------|----------------|-------------|
| INVENT-2019_EA | 15572        | 115280         | 1.04        |
| INVENT-2019_AA | 799          | 14353          | 1.03        |
| MVP_EA         | 18952        | 411746         | 1.04        |
| MVP_AA         | 5521         | 103791         | 1.02        |
| MVP_HIS        | 1188         | 45634          | 1.13        |
| FinnGen_EA     | 9176         | 209616         | 1.04        |
| EGP_EA         | 4122         | 181553         | 1.05        |
| UKB_EA         | 18385        | 91834          | 1.02        |
| UKB_AA         | 280          | 1046           | 0.96        |
| MGB_AA         | 225          | 1481           | 1.22        |
| MGB_EA         | 2967         | 27957          | 1.06        |
| MGB_HIS        | 100          | 1352           | 1.12        |
| UPenn_EA       | 380          | 6210           | 1.11        |
| UPenn_AA       | 203          | 1719           | 1.09        |
| FARIVE_EA      | 545          | 532            | 1           |
| BioME_EA       | 200          | 8007           | 1.19        |
| BioME_AA       | 382          | 6074           | 0.99        |
| BioME_HIS      | 397          | 8992           | 1.04        |
| RETROVE_EA     | 400          | 400            | 0.92        |
| GAIT2_EA       | 85           | 850            | 0.85        |
| BBJ_EAS        | 507          | 178366         | 0.87        |
| MESA_EA        | 94           | 2341           | 1.15        |
| MESA_AA        | 72           | 1511           | 1.14        |
| MESA_HIS       | 35           | 1389           | 1.03        |
| MARTHA12_EA    | 893          | 3414           | 1           |
| <b>Overall</b> | <b>81480</b> | <b>1425448</b> | <b>1.04</b> |

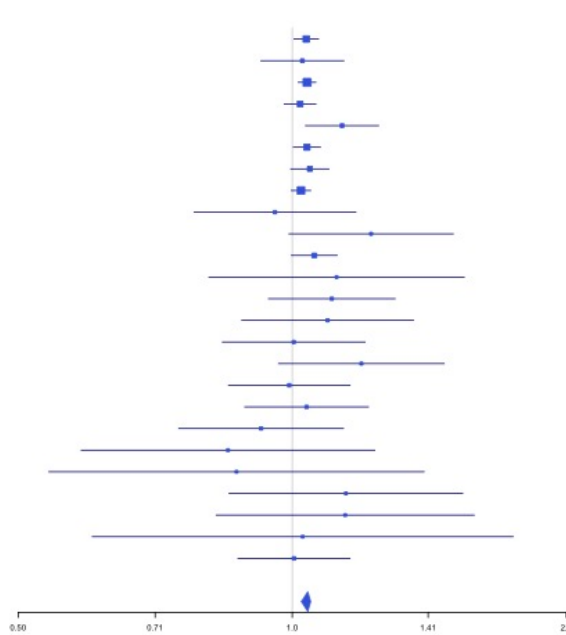

Supplementary Figure 2.45 – rs10099512 (chr8:9178821) in locus 57 (LOC101929128;LOC157273)

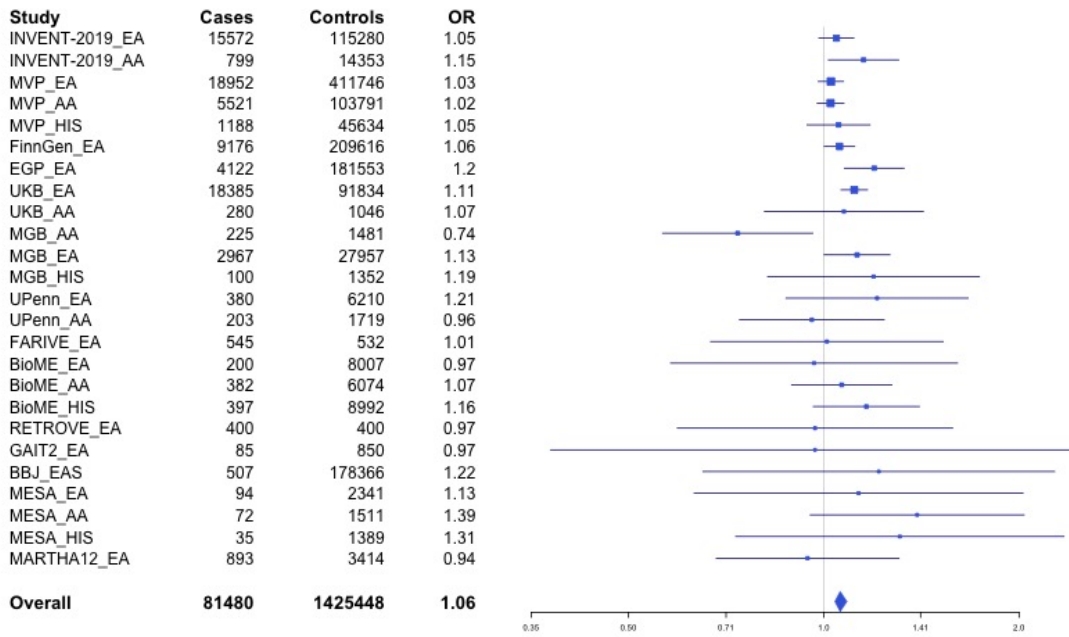

Supplementary Figure 2.46 – rs2048528 (chr8:23373680) in locus 59 (ENTPD4;SLC25A37)

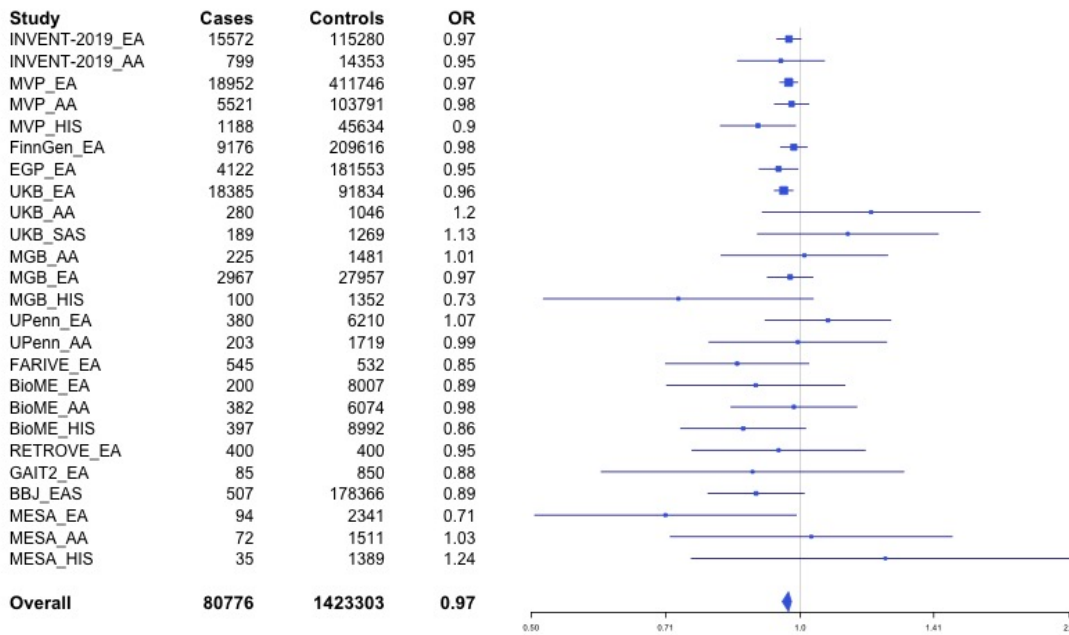

Supplementary Figure 2.47 – rs2685412 (chr8:27810603) in locus 60 (SCARA5)

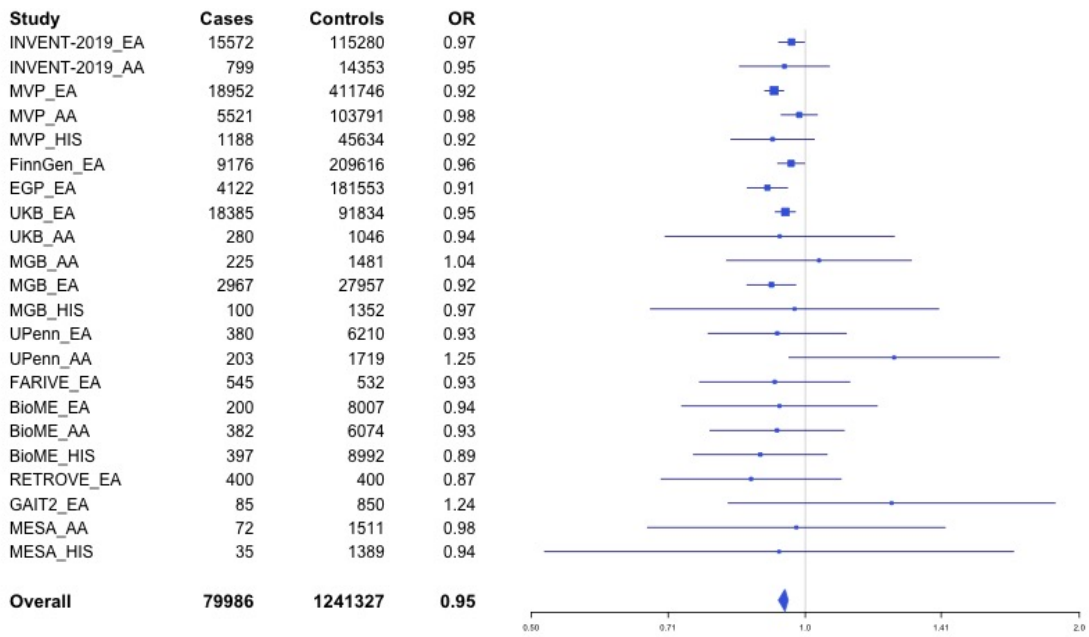

Supplementary Figure 2.48 – rs2915595 (chr8:30402817) in locus 61 (RBPMS)

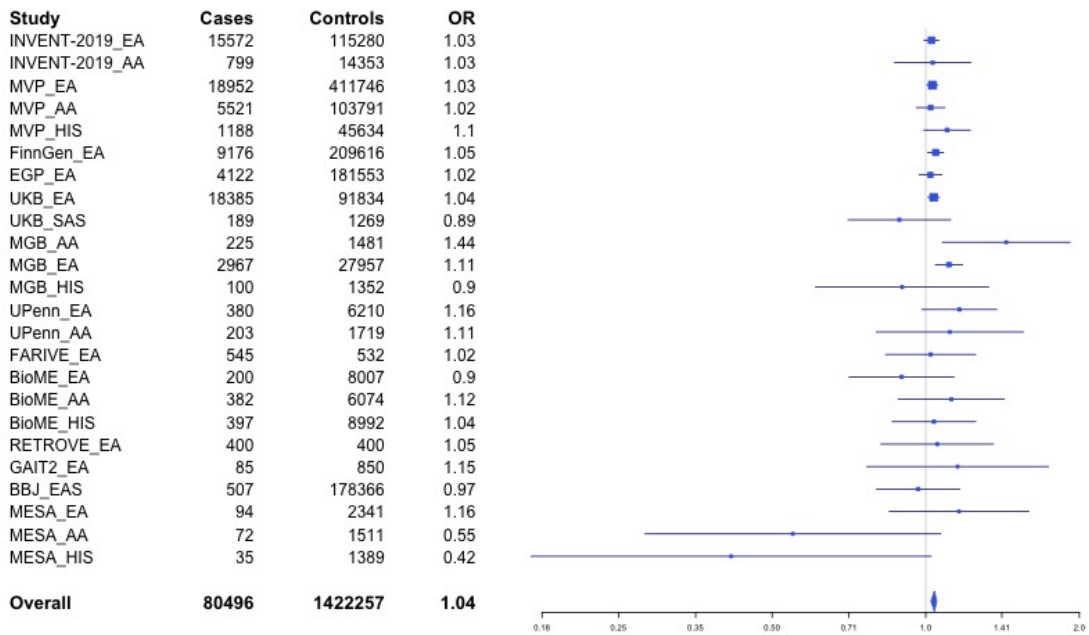

Supplementary Figure 2.49 – rs6993770 (chr8:106581528) in locus 62 (ZFPM2)

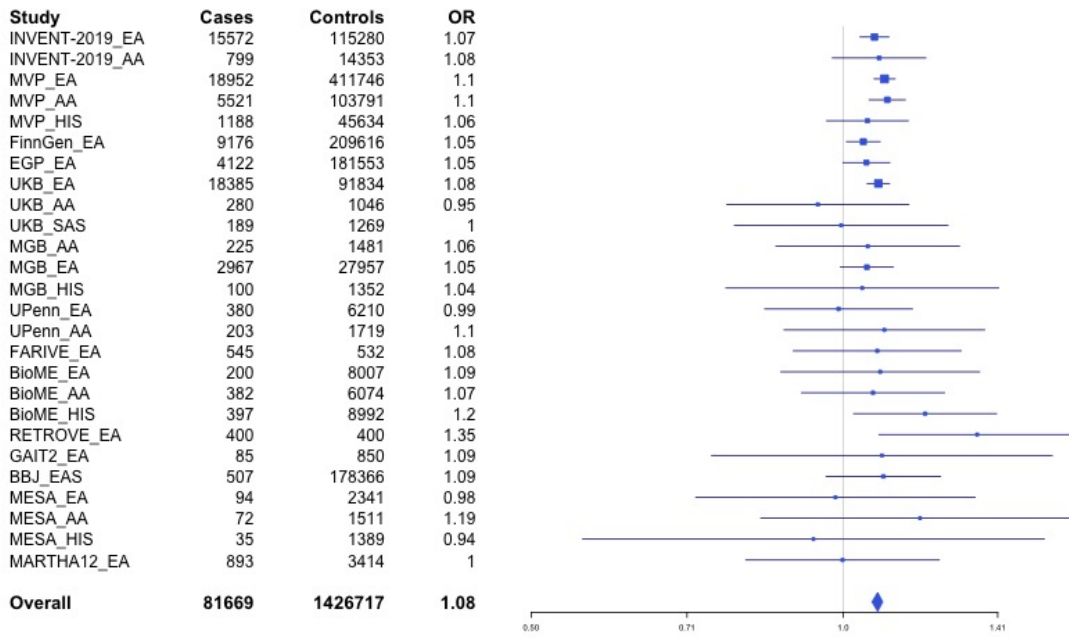

Supplementary Figure 2.50 – rs4236786 (chr8:108291878) in locus 63 (ANGPT1)

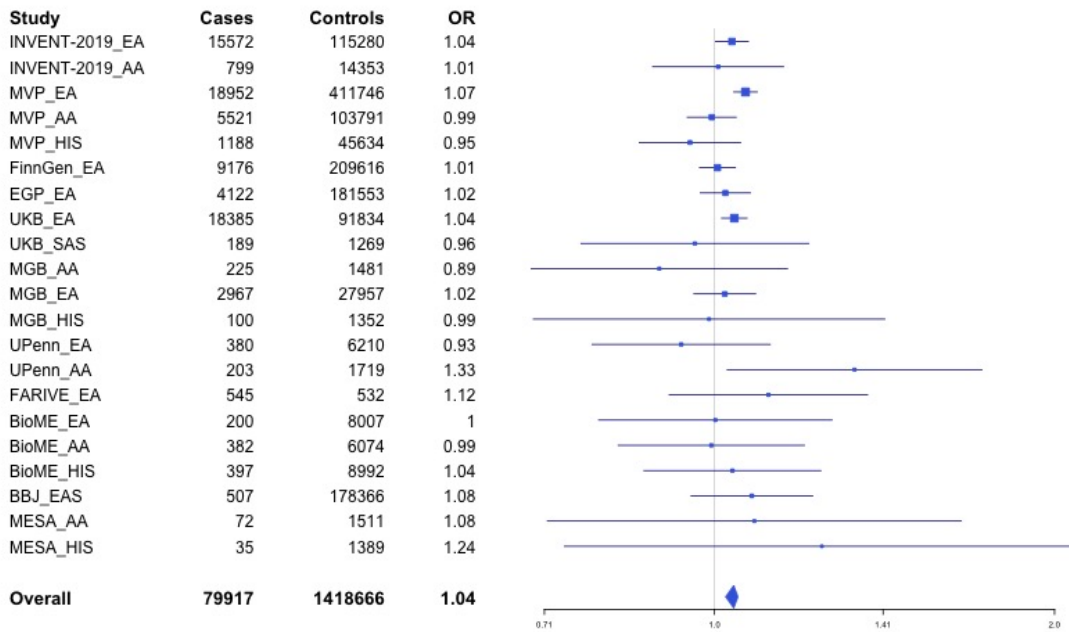

Supplementary Figure 2.51 – rs10820606 (chr9:99192919) in locus 65 (ZNF367;HABP4)

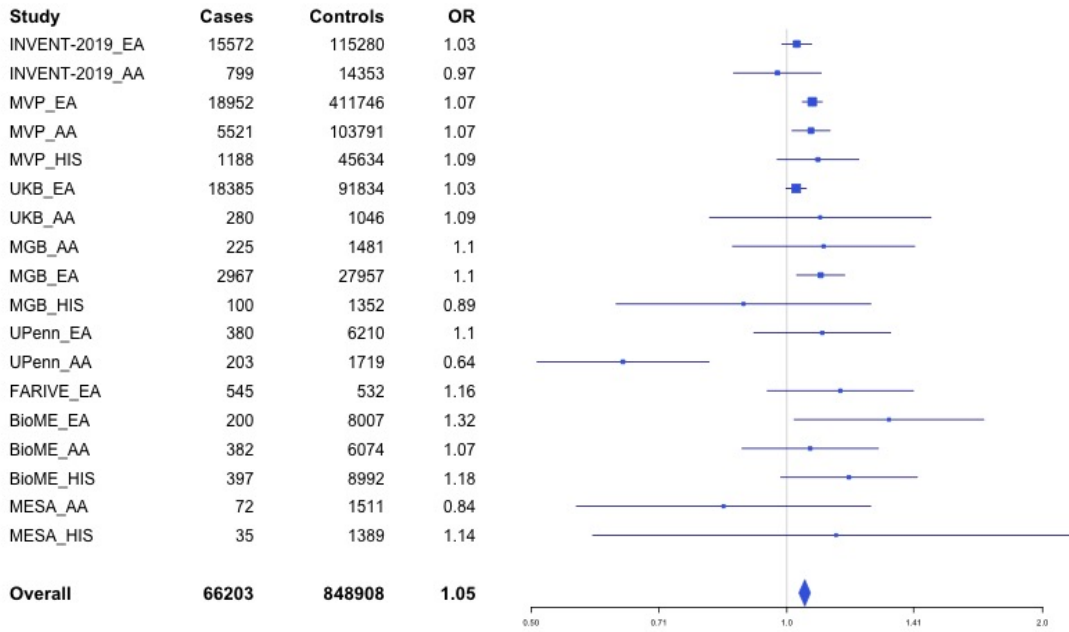

Supplementary Figure 2.52 – rs505922 (chr9:136149229) in locus 66 (ABO)

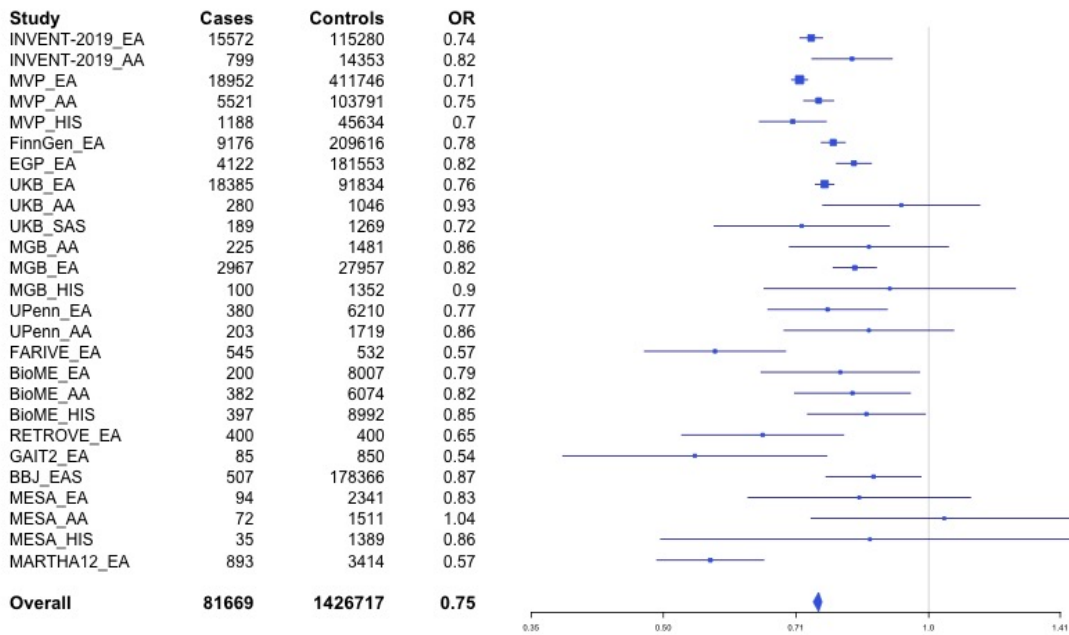



Supplementary Figure 2.53 – rs1243187 (chr10:21907016) in locus 68 (MLLT10)

| Study          | Cases        | Controls       | OR          |
|----------------|--------------|----------------|-------------|
| INVENT-2019_EA | 15572        | 115280         | 0.96        |
| INVENT-2019_AA | 799          | 14353          | 1.01        |
| MVP_EA         | 18952        | 411746         | 0.97        |
| MVP_AA         | 5521         | 103791         | 0.99        |
| MVP_HIS        | 1188         | 45634          | 1.03        |
| FinnGen_EA     | 9176         | 209616         | 0.98        |
| EGP_EA         | 4122         | 181553         | 0.98        |
| UKB_EA         | 18385        | 91834          | 0.95        |
| UKB_SAS        | 189          | 1269           | 0.88        |
| MGB_AA         | 225          | 1481           | 0.61        |
| MGB_EA         | 2967         | 27957          | 0.94        |
| MGB_HIS        | 100          | 1352           | 1.28        |
| UPenn_EA       | 380          | 6210           | 0.97        |
| UPenn_AA       | 203          | 1719           | 0.83        |
| FARIVE_EA      | 545          | 532            | 0.96        |
| BioME_EA       | 200          | 8007           | 0.91        |
| BioME_AA       | 382          | 6074           | 1.08        |
| BioME_HIS      | 397          | 8992           | 0.98        |
| RETROVE_EA     | 400          | 400            | 1.1         |
| GAIT2_EA       | 85           | 850            | 1.3         |
| BBJ_EAS        | 507          | 178366         | 1.27        |
| MESA_EA        | 94           | 2341           | 1.15        |
| MESA_AA        | 72           | 1511           | 0.64        |
| MESA_HIS       | 35           | 1389           | 1.27        |
| <b>Overall</b> | <b>80496</b> | <b>1422257</b> | <b>0.97</b> |

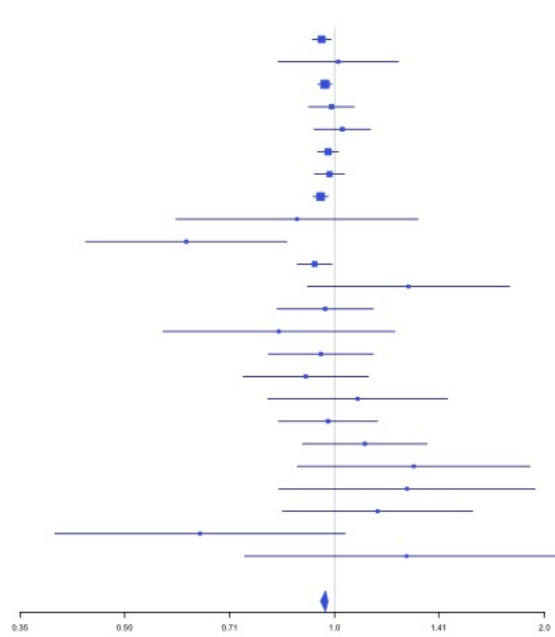

Supplementary Figure 2.54 – rs4272700 (chr10:27881308) in locus 69 (RAB18;MKX)

| Study          | Cases        | Controls       | OR          |
|----------------|--------------|----------------|-------------|
| INVENT-2019_EA | 15572        | 115280         | 1.02        |
| INVENT-2019_AA | 799          | 14353          | 1.03        |
| MVP_EA         | 18952        | 411746         | 1.03        |
| MVP_AA         | 5521         | 103791         | 1.19        |
| MVP_HIS        | 1188         | 45634          | 1.11        |
| FinnGen_EA     | 9176         | 209616         | 1.05        |
| EGP_EA         | 4122         | 181553         | 1.07        |
| UKB_EA         | 18385        | 91834          | 1.02        |
| UKB_SAS        | 189          | 1269           | 0.94        |
| MGB_AA         | 225          | 1481           | 1.47        |
| MGB_EA         | 2967         | 27957          | 1.06        |
| MGB_HIS        | 100          | 1352           | 0.8         |
| UPenn_EA       | 380          | 6210           | 1.03        |
| UPenn_AA       | 203          | 1719           | 1.3         |
| FARIVE_EA      | 545          | 532            | 1.26        |
| BioME_EA       | 200          | 8007           | 1.1         |
| BioME_AA       | 382          | 6074           | 1.28        |
| BioME_HIS      | 397          | 8992           | 1.11        |
| RETROVE_EA     | 400          | 400            | 1.26        |
| GAIT2_EA       | 85           | 850            | 0.8         |
| BBJ_EAS        | 507          | 178366         | 1           |
| MESA_EA        | 94           | 2341           | 0.96        |
| MESA_AA        | 72           | 1511           | 1.46        |
| MESA_HIS       | 35           | 1389           | 1.5         |
| <b>Overall</b> | <b>80496</b> | <b>1422257</b> | <b>1.04</b> |

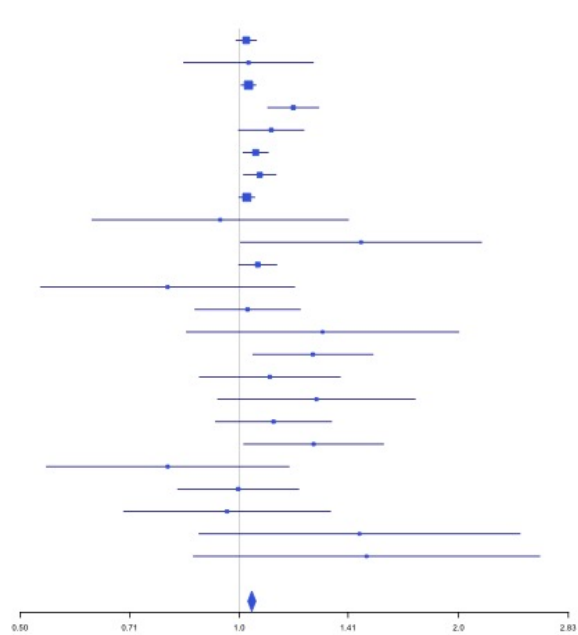

Supplementary Figure 2.55 – rs17490626 (chr10:71218646) in locus 72 (TSPAN15)

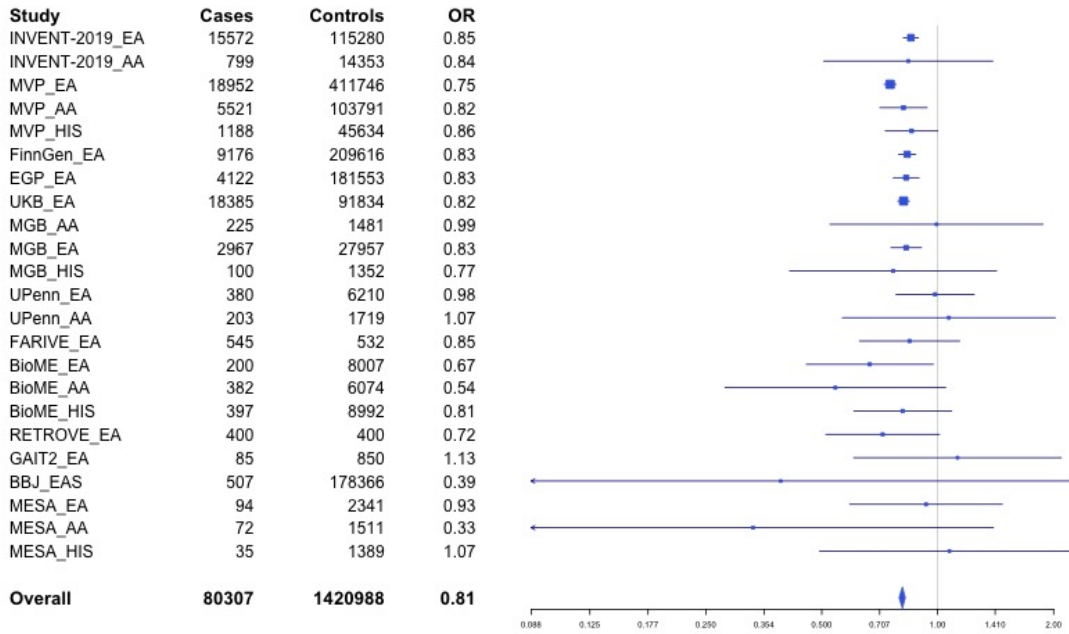

Supplementary Figure 2.56 – rs16937003 (chr10:80938499) in locus 73 (ZMIZ1)

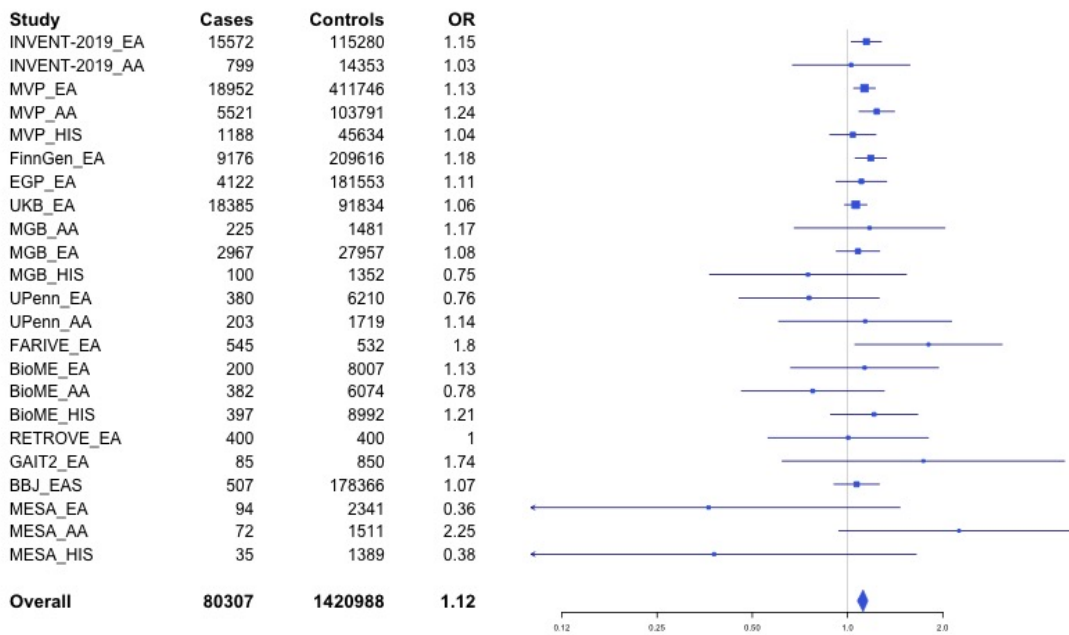

Supplementary Figure 2.57 – rs57866767 (chr10:96023077) in locus 74 (PLCE1)

| Study          | Cases        | Controls       | OR          |
|----------------|--------------|----------------|-------------|
| INVENT-2019_EA | 15572        | 115280         | 0.97        |
| INVENT-2019_AA | 799          | 14353          | 0.86        |
| MVP_EA         | 18952        | 411746         | 0.96        |
| MVP_AA         | 5521         | 103791         | 0.95        |
| MVP_HIS        | 1188         | 45634          | 1.02        |
| FinnGen_EA     | 9176         | 209616         | 0.96        |
| EGP_EA         | 4122         | 181553         | 0.96        |
| UKB_EA         | 18385        | 91834          | 0.96        |
| UKB_AA         | 280          | 1046           | 1.04        |
| UKB_SAS        | 189          | 1269           | 1           |
| MGB_AA         | 225          | 1481           | 0.97        |
| MGB_EA         | 2967         | 27957          | 0.96        |
| MGB_HIS        | 100          | 1352           | 1.11        |
| UPenn_EA       | 380          | 6210           | 0.92        |
| UPenn_AA       | 203          | 1719           | 0.99        |
| FARIVE_EA      | 545          | 532            | 0.91        |
| BioME_EA       | 200          | 8007           | 0.85        |
| BioME_AA       | 382          | 6074           | 0.96        |
| BioME_HIS      | 397          | 8992           | 0.85        |
| RETROVE_EA     | 400          | 400            | 1.03        |
| GAIT2_EA       | 85           | 850            | 0.91        |
| BBJ_EAS        | 507          | 178366         | 0.9         |
| MESA_EA        | 94           | 2341           | 0.91        |
| MESA_AA        | 72           | 1511           | 1.18        |
| MESA_HIS       | 35           | 1389           | 1.01        |
| MARTHA12_EA    | 893          | 3414           | 0.95        |
| <b>Overall</b> | <b>81669</b> | <b>1426717</b> | <b>0.96</b> |

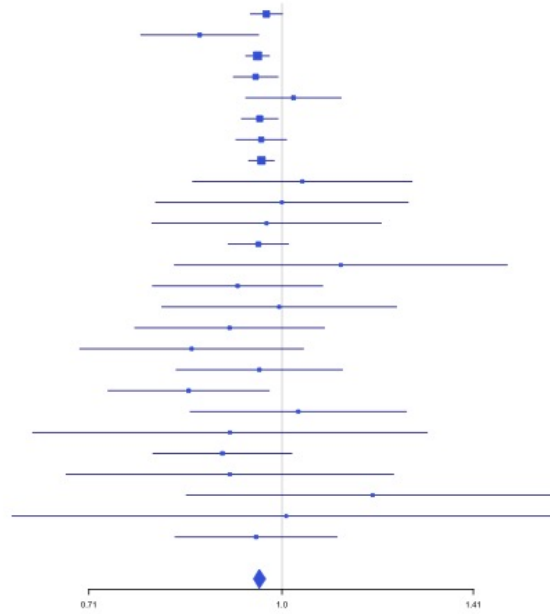

Supplementary Figure 2.58 – rs10886430 (chr10:121010256) in locus 75 (GRK5)

| Study          | Cases        | Controls       | OR          |
|----------------|--------------|----------------|-------------|
| INVENT-2019_EA | 15572        | 115280         | 0.9         |
| INVENT-2019_AA | 799          | 14353          | 1.43        |
| MVP_EA         | 18952        | 411746         | 0.86        |
| MVP_AA         | 5521         | 103791         | 0.89        |
| MVP_HIS        | 1188         | 45634          | 0.83        |
| FinnGen_EA     | 9176         | 209616         | 0.91        |
| EGP_EA         | 4122         | 181553         | 0.92        |
| UKB_EA         | 18385        | 91834          | 0.89        |
| MGB_AA         | 225          | 1481           | 1.11        |
| MGB_EA         | 2967         | 27957          | 0.93        |
| MGB_HIS        | 100          | 1352           | 1.21        |
| UPenn_EA       | 380          | 6210           | 0.95        |
| UPenn_AA       | 203          | 1719           | 0.66        |
| FARIVE_EA      | 545          | 532            | 1.04        |
| BioME_EA       | 200          | 8007           | 0.76        |
| BioME_AA       | 382          | 6074           | 1.16        |
| BioME_HIS      | 397          | 8992           | 0.92        |
| RETROVE_EA     | 400          | 400            | 0.88        |
| GAIT2_EA       | 85           | 850            | 0.88        |
| BBJ_EAS        | 507          | 178366         | 3.05        |
| MESA_EA        | 94           | 2341           | 0.75        |
| MESA_AA        | 72           | 1511           | 0.33        |
| MESA_HIS       | 35           | 1389           | 1.71        |
| <b>Overall</b> | <b>80307</b> | <b>1420988</b> | <b>0.89</b> |

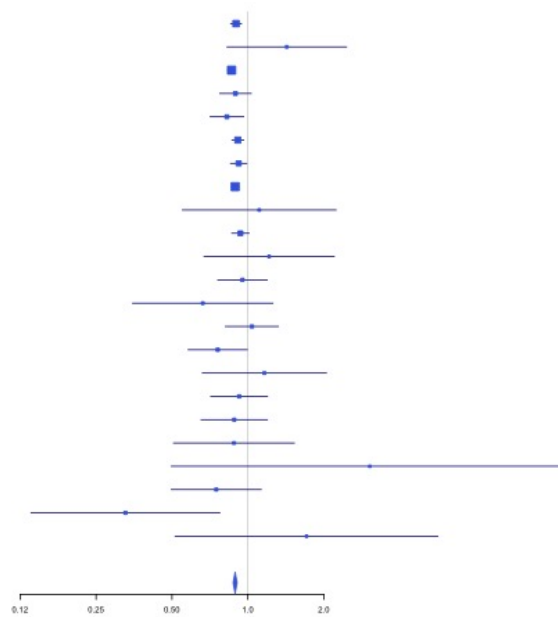

Supplementary Figure 2.59 – rs2030291 (chr11:16251251) in locus 77 (SOX6)

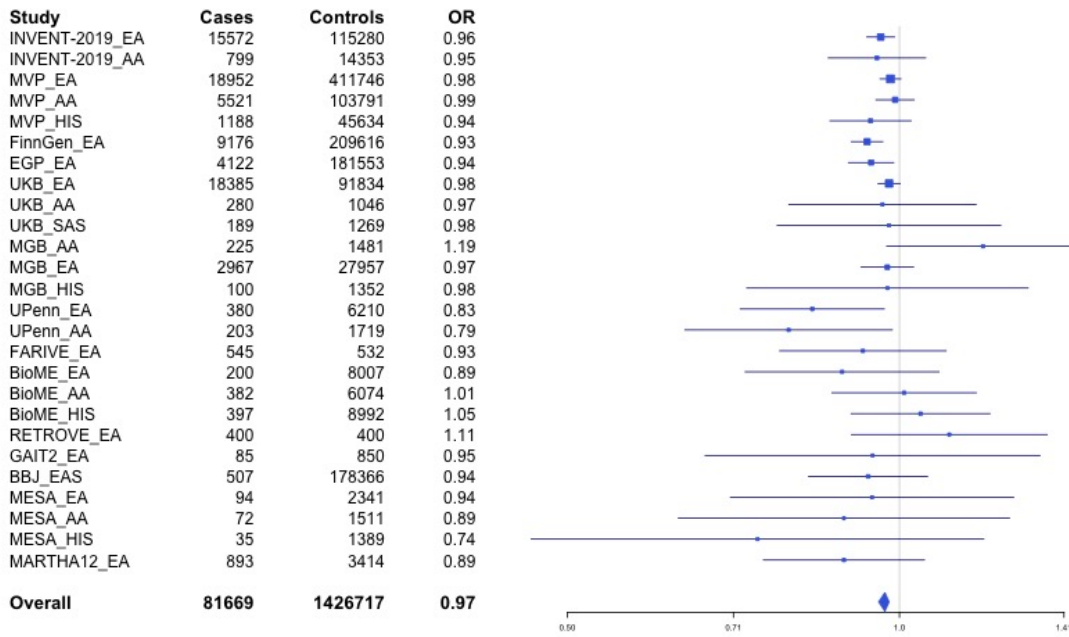

Supplementary Figure 2.60 – rs11032074 (chr11:32993887) in locus 78 (QSER1)

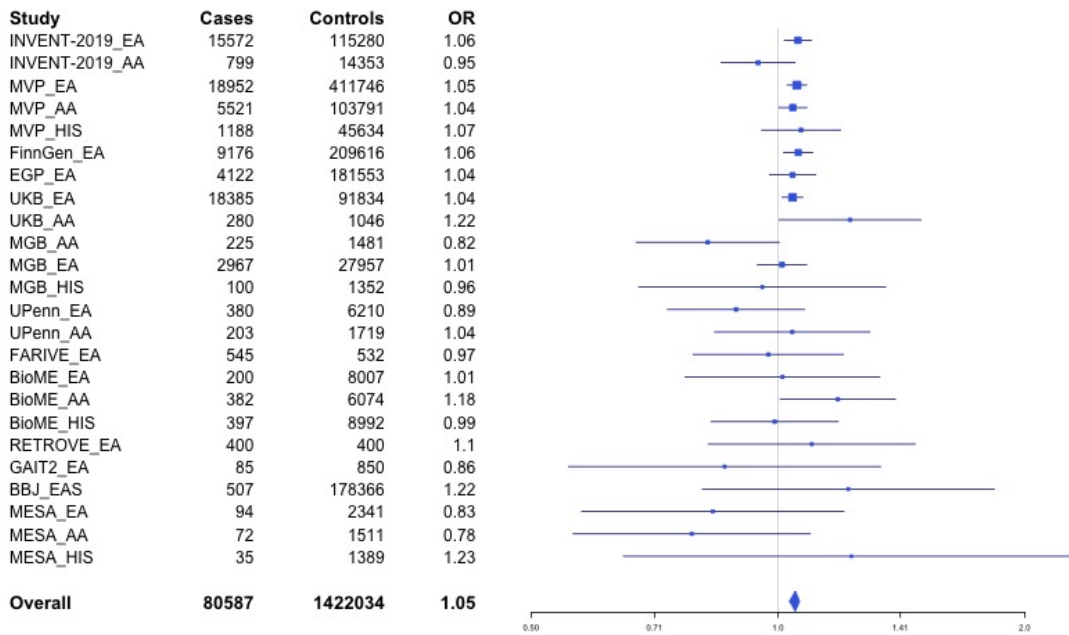

Supplementary Figure 2.61 – rs1799963 (chr11:46761055) in locus 79 (F2)

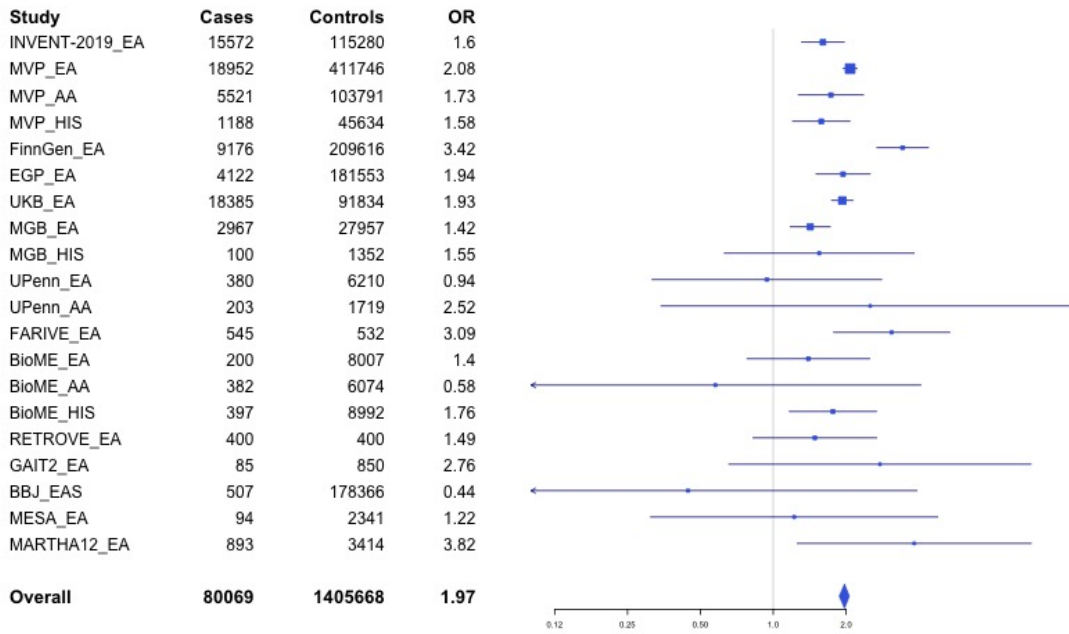

Supplementary Figure 2.62 – rs141798115 (chr11:56875074) in locus 80 (OR5AK4P ;LRRC55)

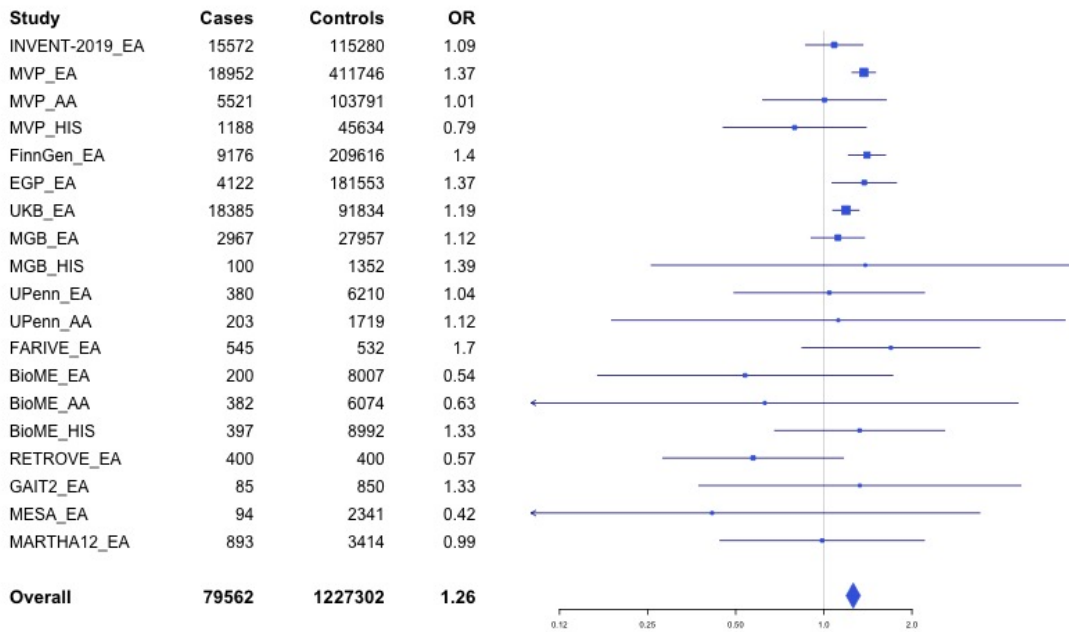

Supplementary Figure 2.63 – rs4354705 (chr11:60088159) in locus 81 (MS4A4A ;MS4A6E)

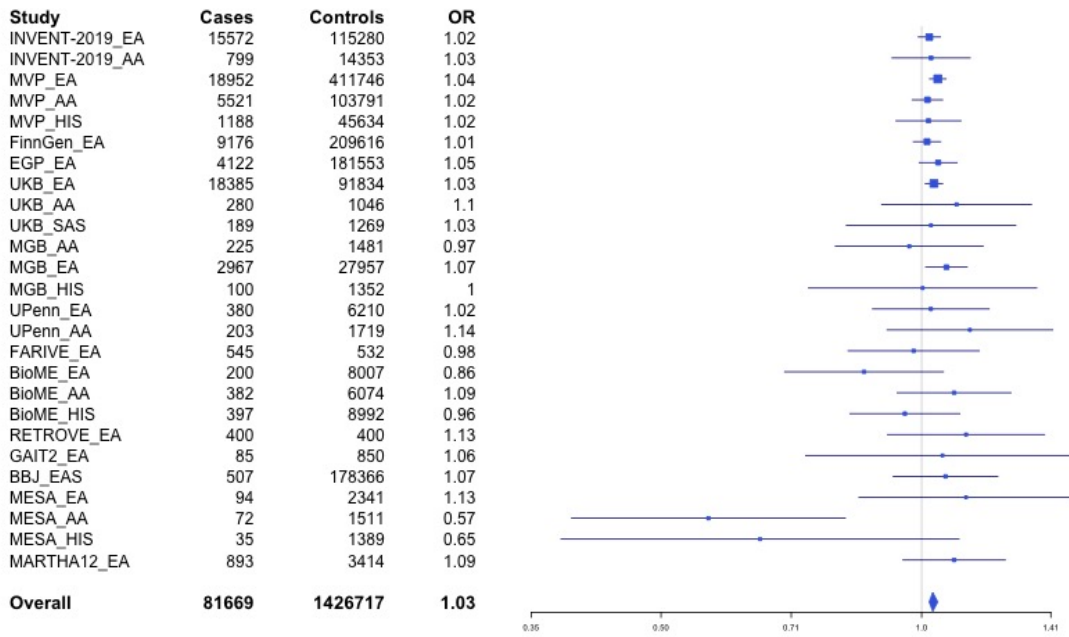

Supplementary Figure 2.64 – rs174551 (chr11:61573684) in locus 82 (FADS1)

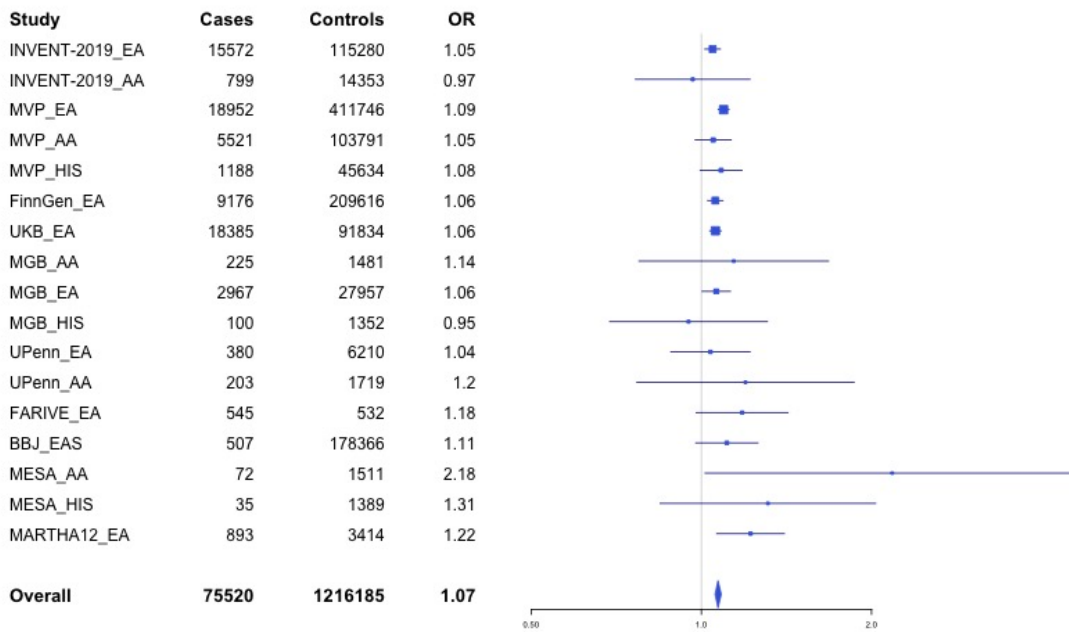

Supplementary Figure 2.65 – rs2846027 (chr11:114003415) in locus 84 (ZBTB16)

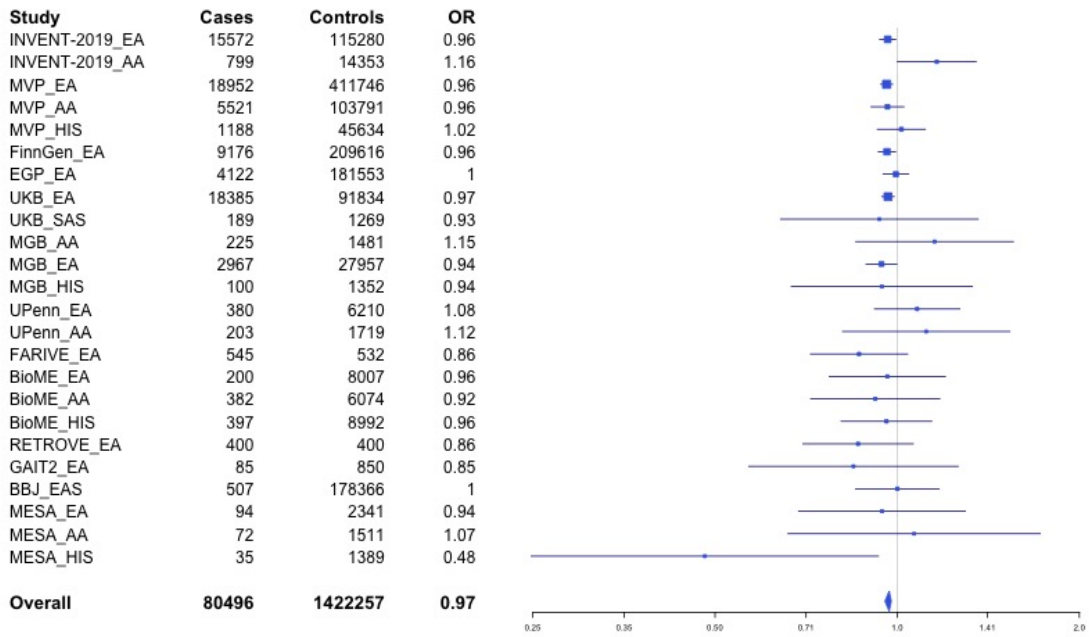

Supplementary Figure 2.66 – rs35257264 (chr11:126296816) in locus 85 (ST3GAL4)

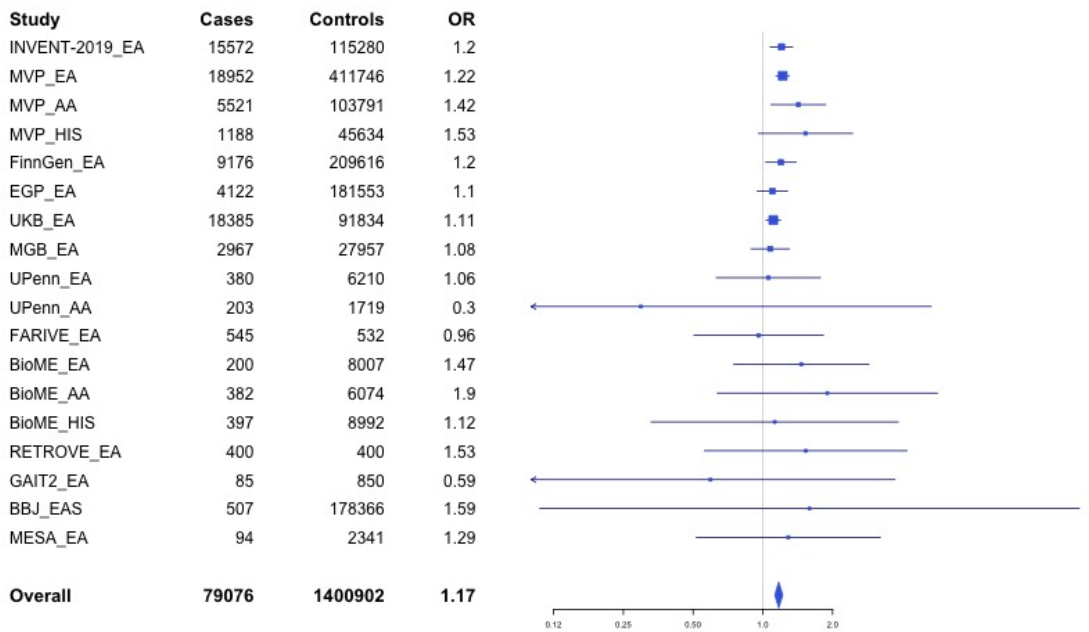



Supplementary Figure 2.67 – rs7107568 (chr11:130779668) in locus 86 (SNX19)

| Study          | Cases        | Controls       | OR          |
|----------------|--------------|----------------|-------------|
| INVENT-2019_EA | 15572        | 115280         | 0.95        |
| INVENT-2019_AA | 799          | 14353          | 0.98        |
| MVP_EA         | 18952        | 411746         | 0.98        |
| MVP_AA         | 5521         | 103791         | 0.97        |
| MVP_HIS        | 1188         | 45634          | 0.89        |
| FinnGen_EA     | 9176         | 209616         | 0.98        |
| EGP_EA         | 4122         | 181553         | 0.97        |
| UKB_EA         | 18385        | 91834          | 0.97        |
| UKB_AA         | 280          | 1046           | 0.8         |
| UKB_SAS        | 189          | 1269           | 1.15        |
| MGB_AA         | 225          | 1481           | 0.88        |
| MGB_EA         | 2967         | 27957          | 0.96        |
| MGB_HIS        | 100          | 1352           | 1.08        |
| UPenn_EA       | 380          | 6210           | 0.83        |
| UPenn_AA       | 203          | 1719           | 0.99        |
| FARIVE_EA      | 545          | 532            | 0.93        |
| BioME_EA       | 200          | 8007           | 0.91        |
| BioME_AA       | 382          | 6074           | 0.99        |
| BioME_HIS      | 397          | 8992           | 1.04        |
| RETROVE_EA     | 400          | 400            | 1           |
| GAIT2_EA       | 85           | 850            | 0.88        |
| BBJ_EAS        | 507          | 178366         | 1           |
| MESA_EA        | 94           | 2341           | 1.05        |
| MESA_AA        | 72           | 1511           | 0.99        |
| MESA_HIS       | 35           | 1389           | 1.01        |
| MARTHA12_EA    | 893          | 3414           | 0.99        |
| <b>Overall</b> | <b>81669</b> | <b>1426717</b> | <b>0.97</b> |

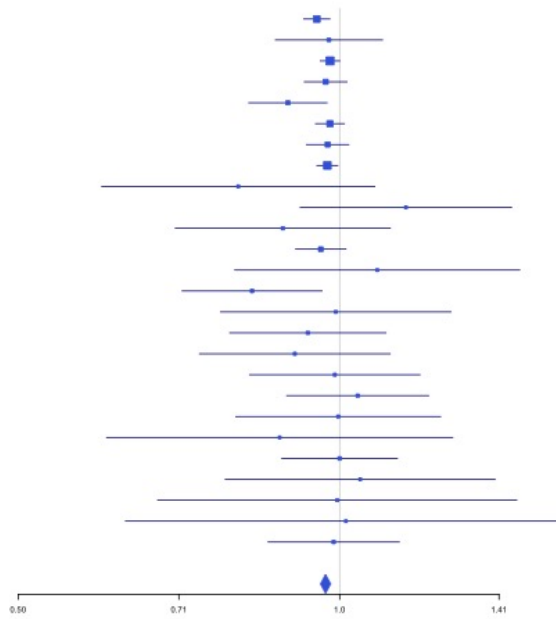

Supplementary Figure 2.68 – rs1558519 (chr12:6153738) in locus 87 (VWF)

| Study          | Cases        | Controls       | OR          |
|----------------|--------------|----------------|-------------|
| INVENT-2019_EA | 15572        | 115280         | 0.92        |
| INVENT-2019_AA | 799          | 14353          | 0.99        |
| MVP_EA         | 18952        | 411746         | 0.92        |
| MVP_AA         | 5521         | 103791         | 0.96        |
| MVP_HIS        | 1188         | 45634          | 1.01        |
| FinnGen_EA     | 9176         | 209616         | 0.94        |
| EGP_EA         | 4122         | 181553         | 0.96        |
| UKB_EA         | 18385        | 91834          | 0.94        |
| UKB_AA         | 280          | 1046           | 0.98        |
| UKB_SAS        | 189          | 1269           | 0.83        |
| MGB_AA         | 225          | 1481           | 1.08        |
| MGB_EA         | 2967         | 27957          | 0.98        |
| MGB_HIS        | 100          | 1352           | 0.78        |
| UPenn_EA       | 380          | 6210           | 1.08        |
| UPenn_AA       | 203          | 1719           | 1.11        |
| FARIVE_EA      | 545          | 532            | 0.86        |
| BioME_EA       | 200          | 8007           | 0.87        |
| BioME_AA       | 382          | 6074           | 0.95        |
| BioME_HIS      | 397          | 8992           | 1.02        |
| RETROVE_EA     | 400          | 400            | 0.9         |
| GAIT2_EA       | 85           | 850            | 1.02        |
| BBJ_EAS        | 507          | 178366         | 1.04        |
| MESA_EA        | 94           | 2341           | 0.82        |
| MESA_AA        | 72           | 1511           | 1.39        |
| MESA_HIS       | 35           | 1389           | 0.7         |
| MARTHA12_EA    | 893          | 3414           | 0.96        |
| <b>Overall</b> | <b>81669</b> | <b>1426717</b> | <b>0.94</b> |

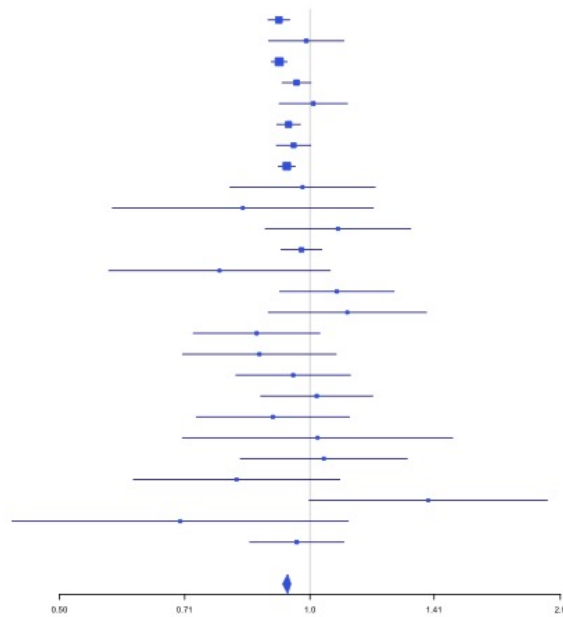

Supplementary Figure 2.69 – rs7311483 (chr12:9053661) in locus 88 (A2ML1;PHC1)

| Study          | Cases        | Controls       | OR          |
|----------------|--------------|----------------|-------------|
| INVENT-2019_EA | 15572        | 115280         | 0.98        |
| INVENT-2019_AA | 799          | 14353          | 0.99        |
| MVP_EA         | 18952        | 411746         | 0.95        |
| MVP_AA         | 5521         | 103791         | 0.92        |
| MVP_HIS        | 1188         | 45634          | 0.91        |
| FinnGen_EA     | 9176         | 209616         | 0.95        |
| EGP_EA         | 4122         | 181553         | 0.95        |
| UKB_EA         | 18385        | 91834          | 0.97        |
| UKB_SAS        | 189          | 1269           | 0.75        |
| MGB_AA         | 225          | 1481           | 0.76        |
| MGB_EA         | 2967         | 27957          | 0.97        |
| MGB_HIS        | 100          | 1352           | 1           |
| UPenn_EA       | 380          | 6210           | 1.05        |
| UPenn_AA       | 203          | 1719           | 0.91        |
| FARIVE_EA      | 545          | 532            | 0.94        |
| BioME_EA       | 200          | 8007           | 0.85        |
| BioME_AA       | 382          | 6074           | 0.89        |
| BioME_HIS      | 397          | 8992           | 0.98        |
| RETROVE_EA     | 400          | 400            | 1.05        |
| GAIT2_EA       | 85           | 850            | 1.12        |
| BBJ_EAS        | 507          | 178366         | 0.99        |
| MESA_EA        | 94           | 2341           | 0.88        |
| MESA_AA        | 72           | 1511           | 0.9         |
| MESA_HIS       | 35           | 1389           | 1.46        |
| <b>Overall</b> | <b>80496</b> | <b>1422257</b> | <b>0.96</b> |

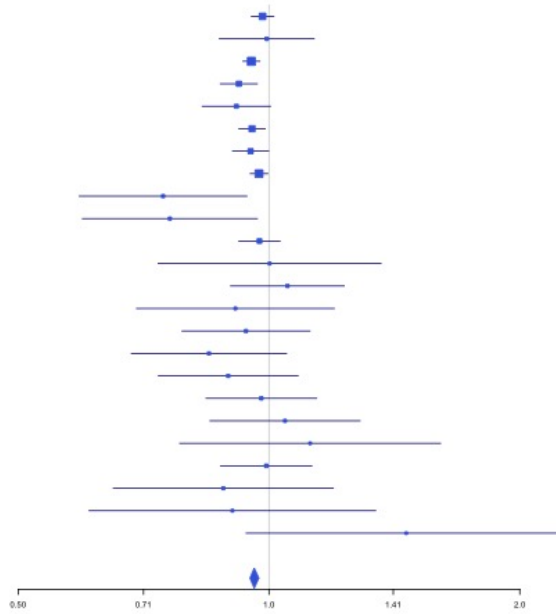

Supplementary Figure 2.70 – rs6580981 (chr12:54723028) in locus 89 (COPZ1)

| Study          | Cases        | Controls       | OR          |
|----------------|--------------|----------------|-------------|
| INVENT-2019_EA | 15572        | 115280         | 0.96        |
| INVENT-2019_AA | 799          | 14353          | 1.03        |
| MVP_EA         | 18952        | 411746         | 0.94        |
| MVP_AA         | 5521         | 103791         | 0.97        |
| MVP_HIS        | 1188         | 45634          | 0.95        |
| FinnGen_EA     | 9176         | 209616         | 0.97        |
| EGP_EA         | 4122         | 181553         | 0.98        |
| UKB_EA         | 18385        | 91834          | 0.94        |
| UKB_SAS        | 189          | 1269           | 1.1         |
| MGB_AA         | 225          | 1481           | 1.1         |
| MGB_HIS        | 100          | 1352           | 0.95        |
| UPenn_EA       | 380          | 6210           | 0.99        |
| UPenn_AA       | 203          | 1719           | 1           |
| FARIVE_EA      | 545          | 532            | 0.9         |
| BioME_EA       | 200          | 8007           | 1.01        |
| BioME_AA       | 382          | 6074           | 1.14        |
| BioME_HIS      | 397          | 8992           | 0.96        |
| RETROVE_EA     | 400          | 400            | 0.82        |
| GAIT2_EA       | 85           | 850            | 0.89        |
| BBJ_EAS        | 507          | 178366         | 0.89        |
| MESA_EA        | 94           | 2341           | 0.83        |
| MESA_AA        | 72           | 1511           | 1.04        |
| MESA_HIS       | 35           | 1389           | 0.88        |
| MARTHA12_EA    | 893          | 3414           | 0.9         |
| <b>Overall</b> | <b>78422</b> | <b>1397714</b> | <b>0.95</b> |

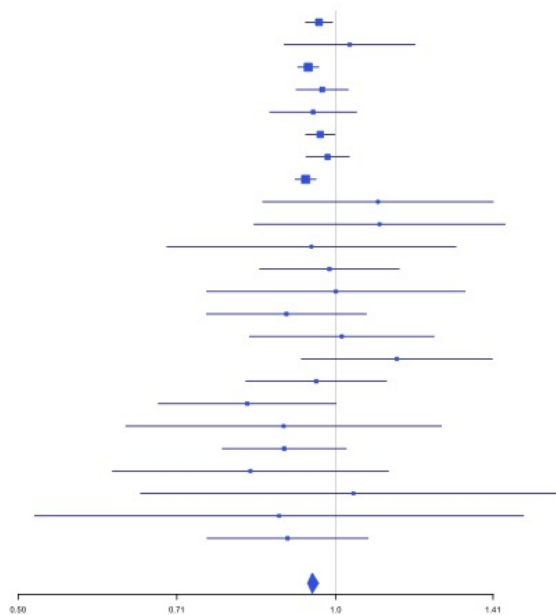

Supplementary Figure 2.71 – rs142351376 (chr12:104136288) in locus 90 (STAB2)

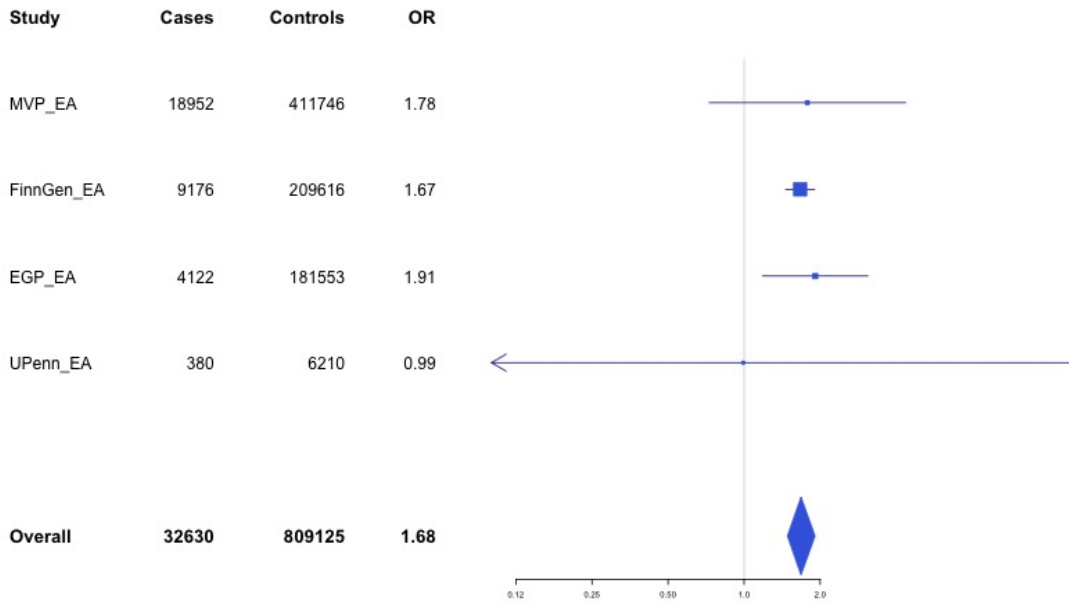

Supplementary Figure 2.72 – rs3184504 (chr12:111884608) in locus 91 (SH2B3)

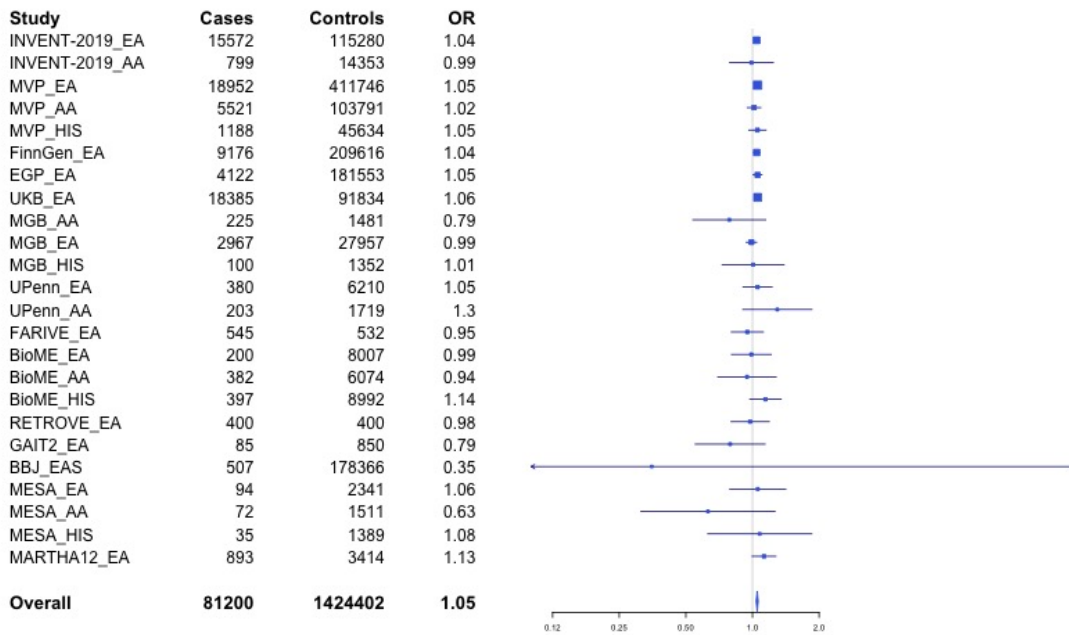

Supplementary Figure 2.73 – rs2851435 (chr12:123712416) in locus 92 (MPHOSPH9)

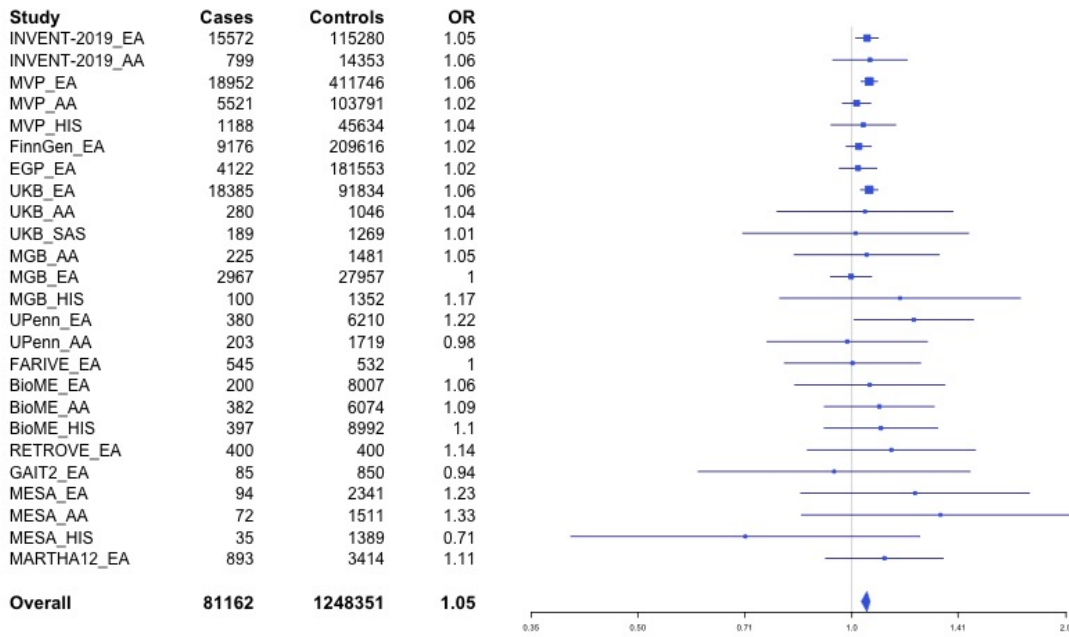

Supplementary Figure 2.74 – rs3211752 (chr13:113787459) in locus 94 (F10)

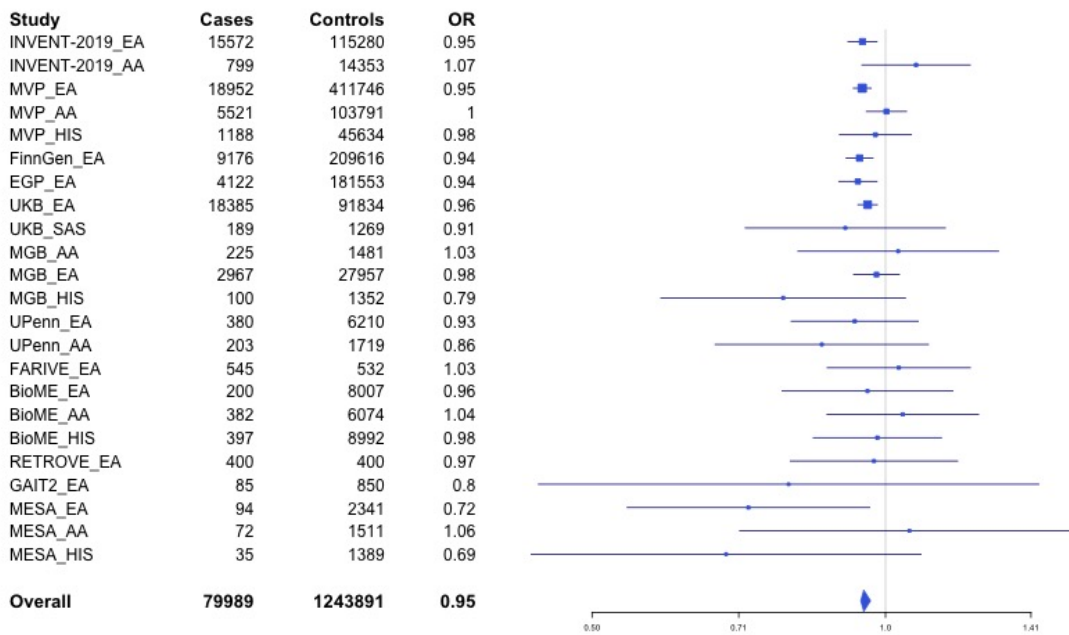

Supplementary Figure 2.75 – rs11158204 (chr14:58844526) in locus 95 (ARID4A ;TOMM20L)

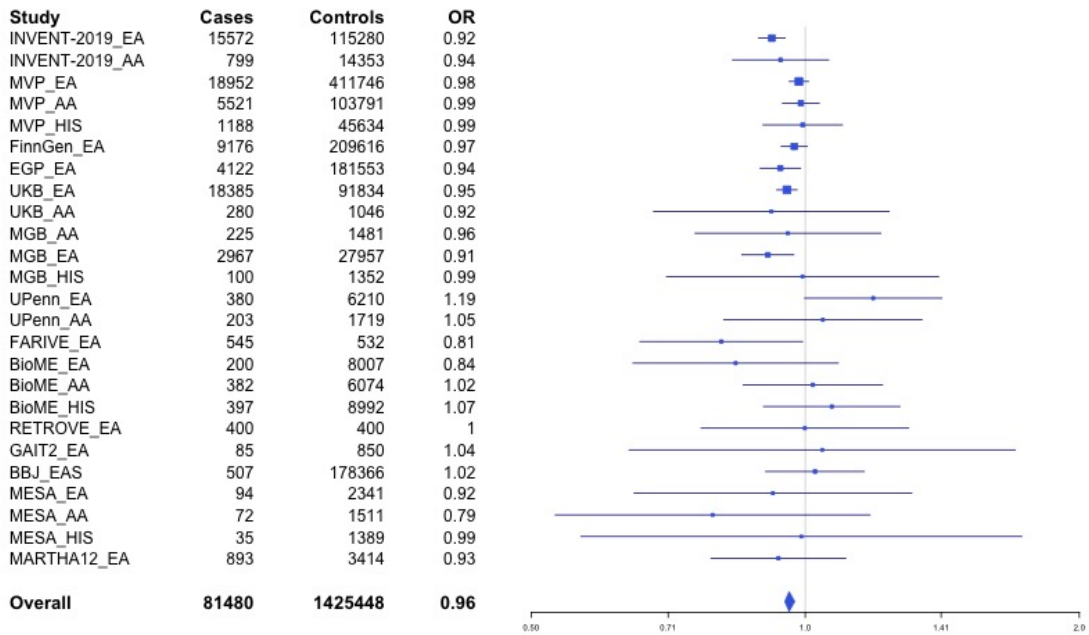

Supplementary Figure 2.76 – rs2127869 (chr14:65794352) in locus 96 (LINC02324 ;MIR4708)

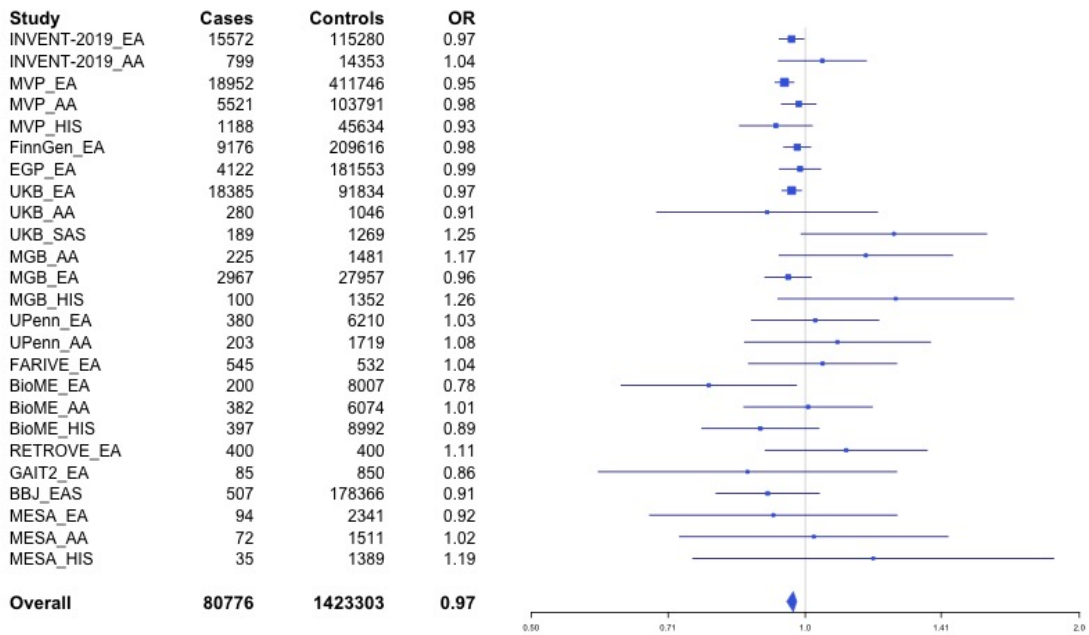

Supplementary Figure 2.77 – rs7152641 (chr14:92213967) in locus 97 (CATSPERB;TC2N)

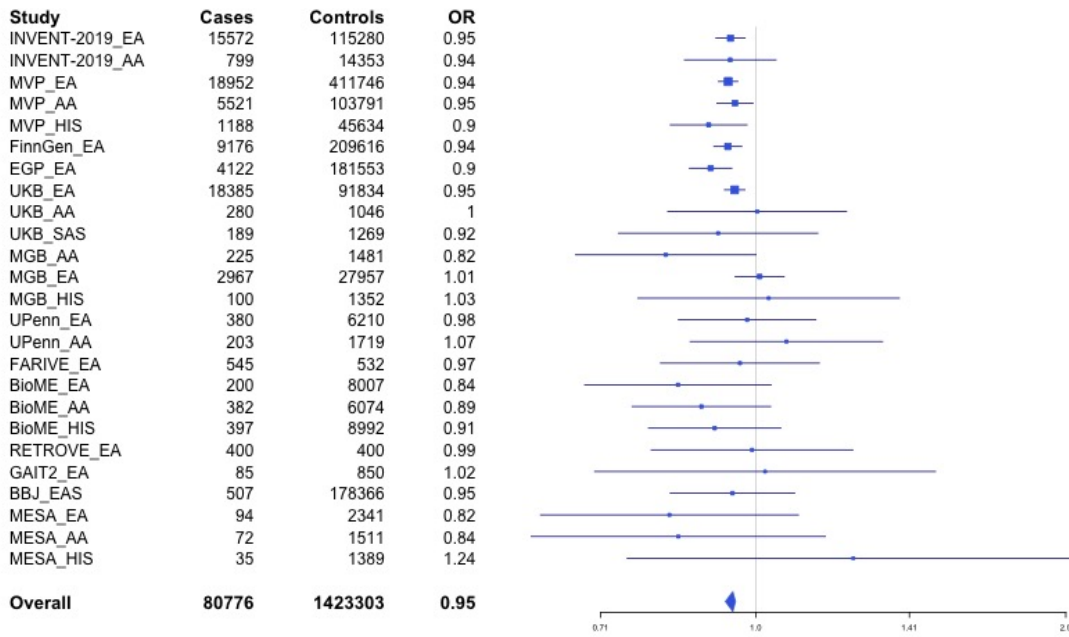

Supplementary Figure 2.78 – rs28929474 (chr14:94844947) in locus 98 (SERPINA1)

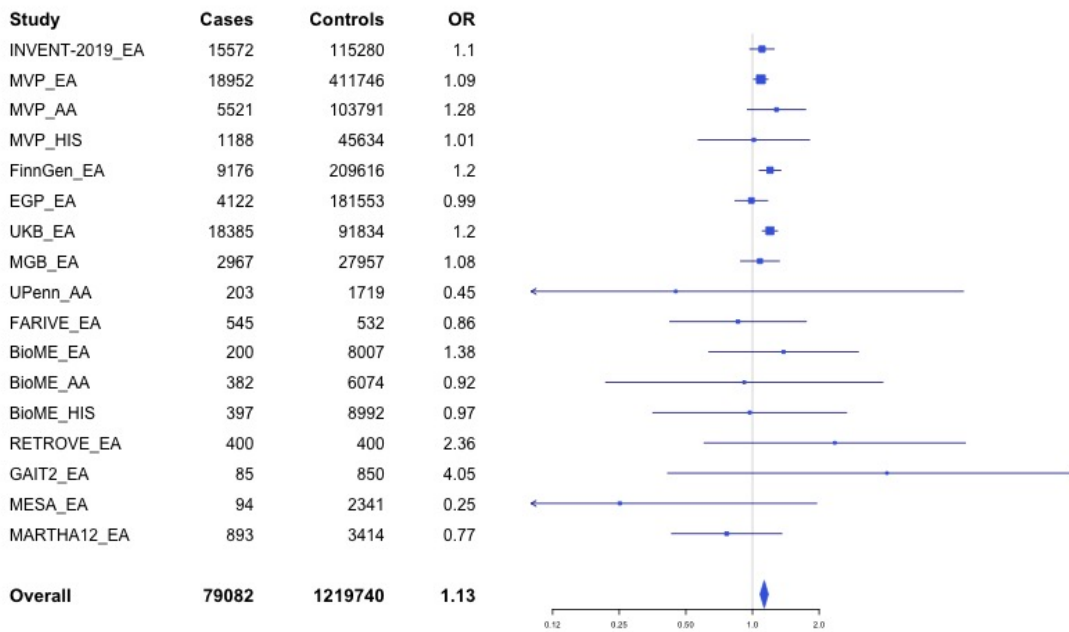

Supplementary Figure 2.79 – rs28519971 (chr14:103089808) in locus 99 (RCOR1)

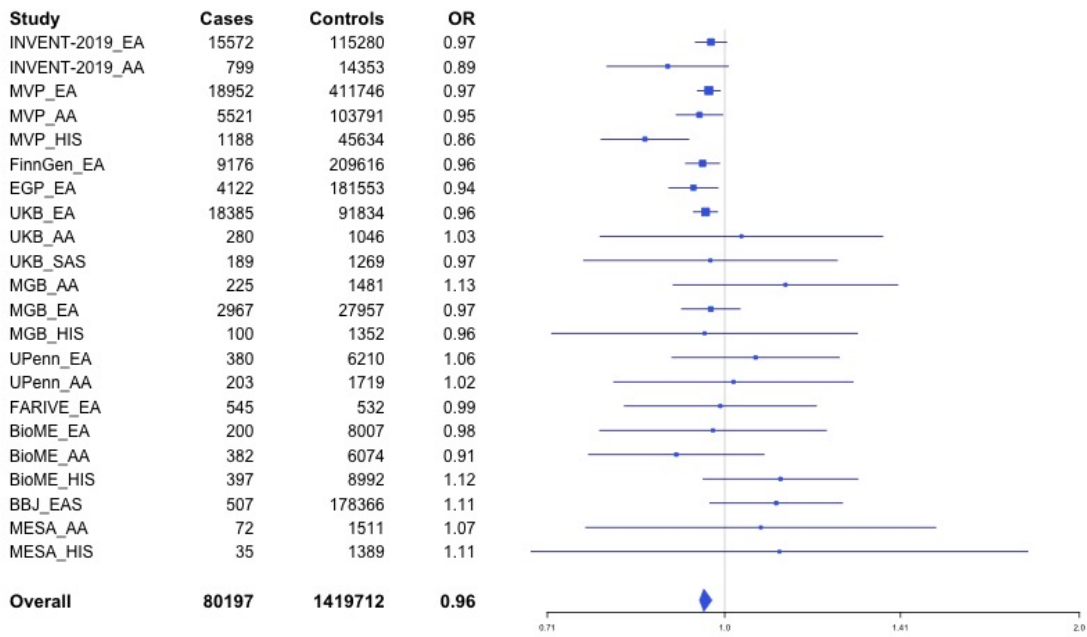

Supplementary Figure 2.80 – rs1247656151 (chr15:43677975) in locus 100 (TUBGCP4)

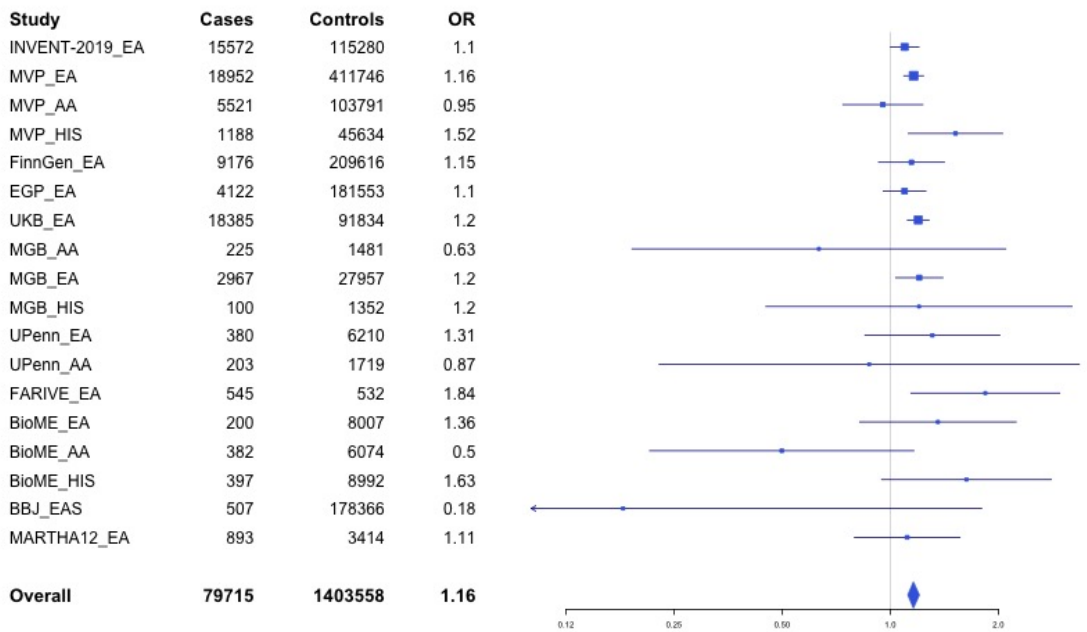



**Supplementary Figure 2.81** – rs7183672 (chr15:96101018) in locus 103 (LINC00924 ;LOC105369212)

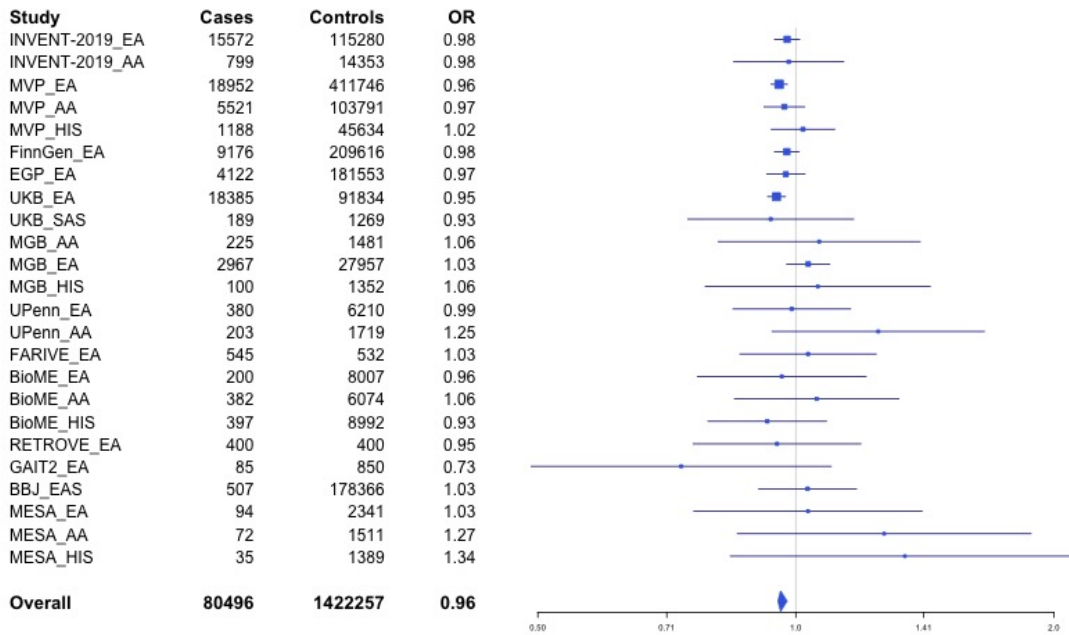

**Supplementary Figure 2.82** – rs71376077 (chr16:15738114) in locus 105 (NDE1)

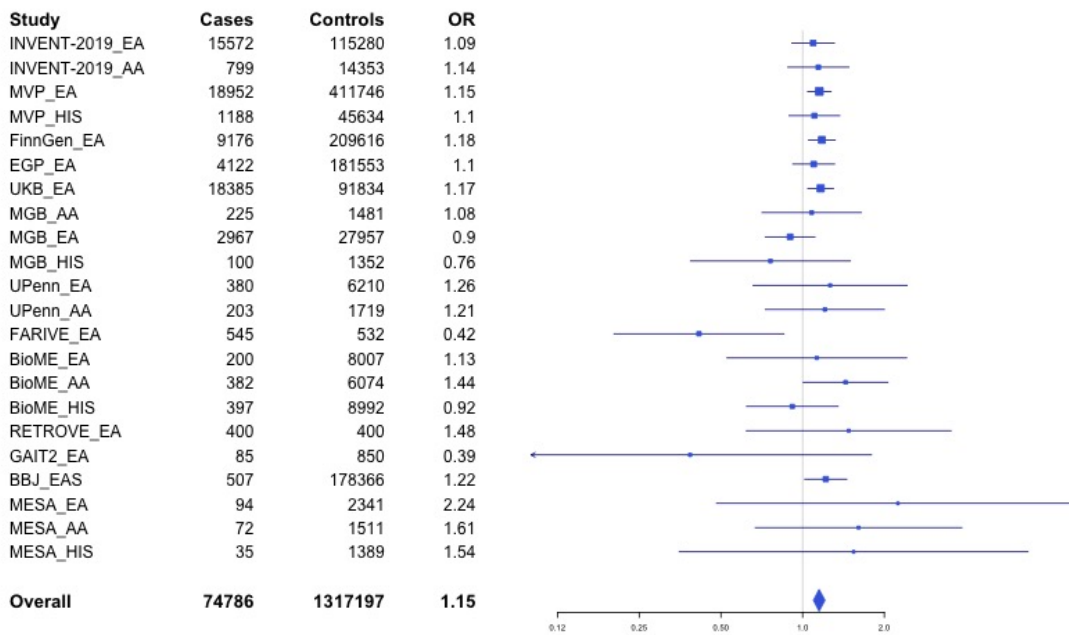

Supplementary Figure 2.83 – rs12443808 (chr16:30996871) in locus 106 (HSD3B7)

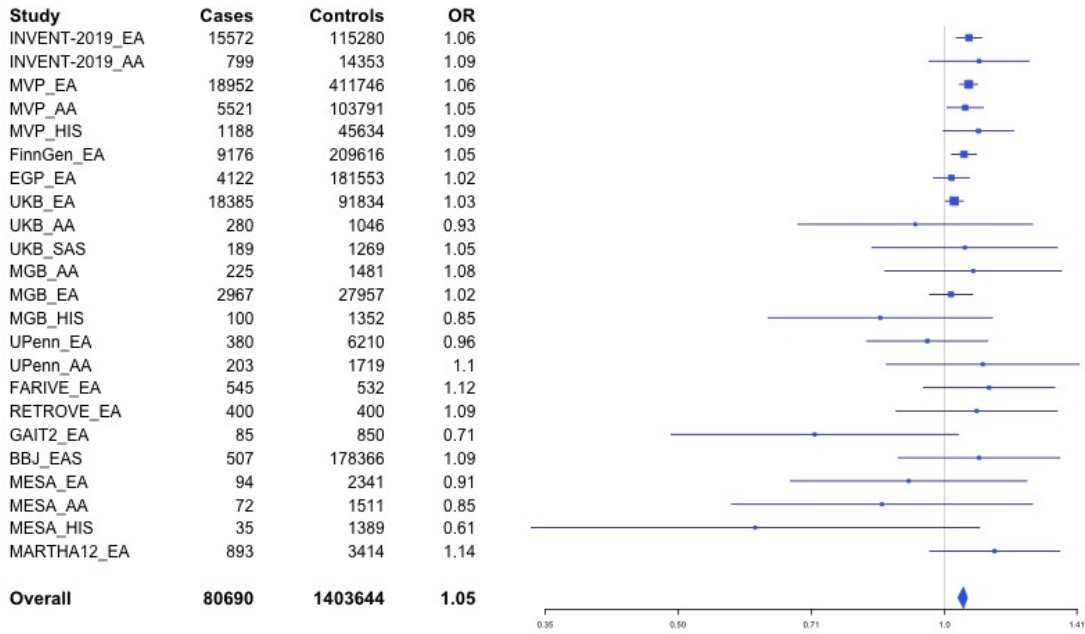

Supplementary Figure 2.84 – rs7197453 (chr16:72079127) in locus 107 (DHODH;HP)

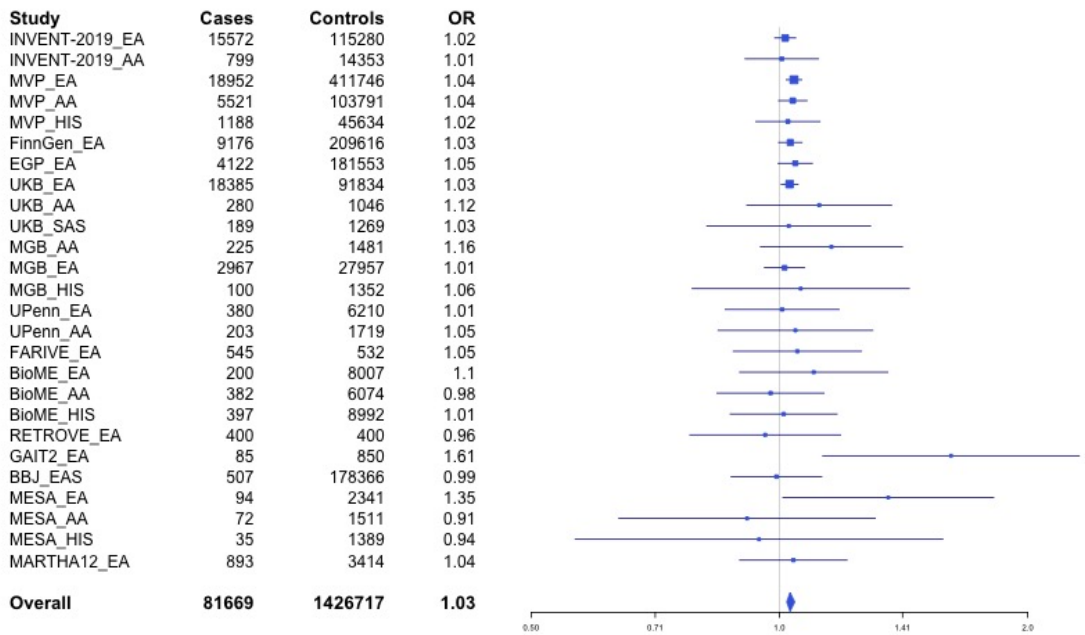

Supplementary Figure 2.85 – rs77246010 (chr16:75429853) in locus 108 (CFDP1)

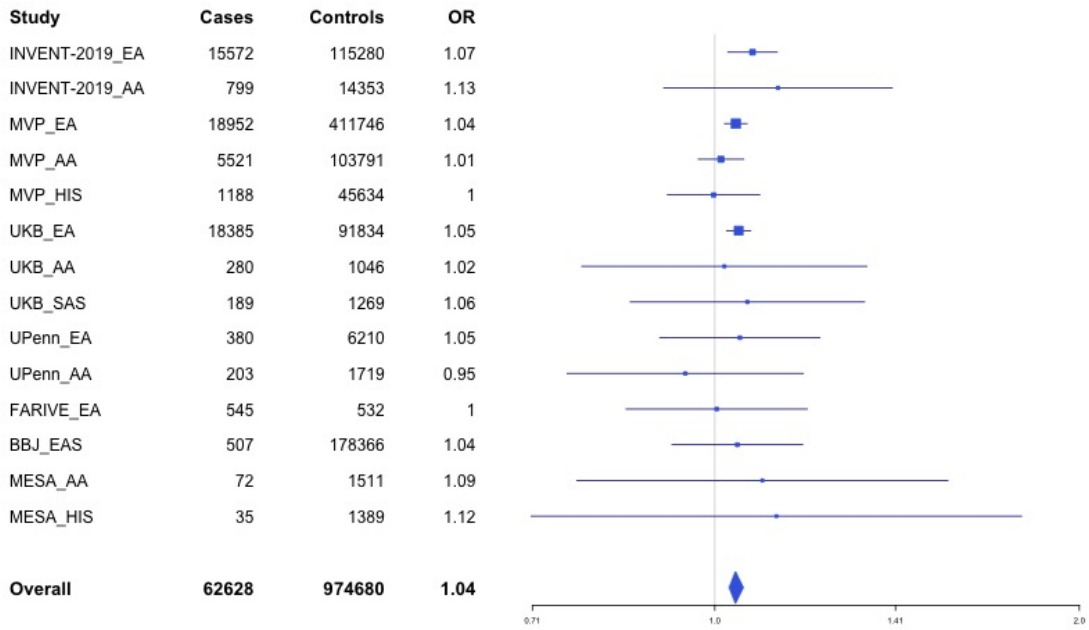

Supplementary Figure 2.86 – rs12445050 (chr16:81870969) in locus 109 (PLCG2)

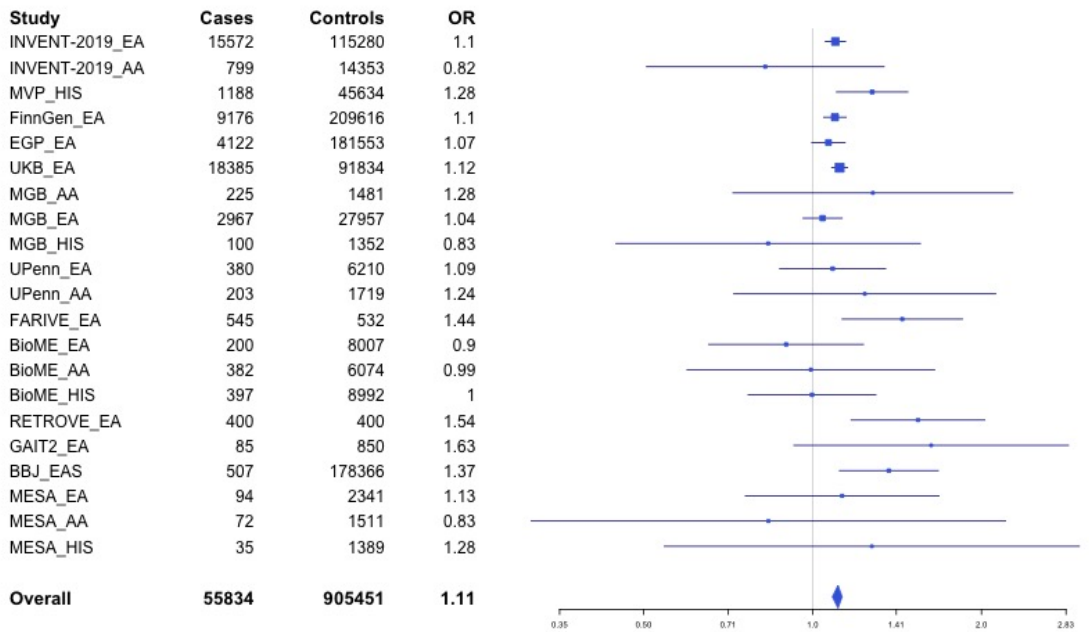

Supplementary Figure 2.87 – rs8049403 (chr16:85778651) in locus 110 (C16orf74)

| Study          | Cases        | Controls       | OR          |
|----------------|--------------|----------------|-------------|
| INVENT-2019_EA | 15572        | 115280         | 1.03        |
| INVENT-2019_AA | 799          | 14353          | 1.27        |
| MVP_EA         | 18952        | 411746         | 1.12        |
| MVP_HIS        | 1188         | 45634          | 1.13        |
| FinnGen_EA     | 9176         | 209616         | 1.23        |
| EGP_EA         | 4122         | 181553         | 1.45        |
| UKB_EA         | 18385        | 91834          | 1.15        |
| MGB_AA         | 225          | 1481           | 1.13        |
| MGB_EA         | 2967         | 27957          | 1.09        |
| MGB_HIS        | 100          | 1352           | 1.06        |
| UPenn_EA       | 380          | 6210           | 0.32        |
| UPenn_AA       | 203          | 1719           | 1.29        |
| FARIVE_EA      | 545          | 532            | 1.17        |
| BioME_EA       | 200          | 8007           | 1.31        |
| BioME_AA       | 382          | 6074           | 0.97        |
| BioME_HIS      | 397          | 8992           | 0.8         |
| RETROVE_EA     | 400          | 400            | 1.54        |
| GAIT2_EA       | 85           | 850            | 2.01        |
| MESA_EA        | 94           | 2341           | 1.16        |
| MESA_AA        | 72           | 1511           | 0.8         |
| MESA_HIS       | 35           | 1389           | 1.24        |
| <b>Overall</b> | <b>74279</b> | <b>1138831</b> | <b>1.15</b> |

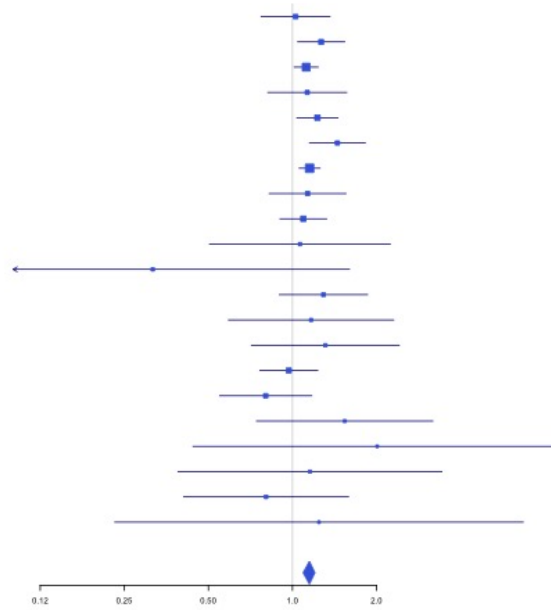

Supplementary Figure 2.88 – rs28634651 (chr16:88553198) in locus 111 (ZFPM1)

| Study          | Cases        | Controls      | OR          |
|----------------|--------------|---------------|-------------|
| INVENT-2019_EA | 15572        | 115280        | 1.04        |
| INVENT-2019_AA | 799          | 14353         | 1.12        |
| MVP_EA         | 18952        | 411746        | 1.06        |
| MVP_HIS        | 1188         | 45634         | 1.05        |
| FinnGen_EA     | 9176         | 209616        | 1.07        |
| UKB_EA         | 18385        | 91834         | 1.04        |
| UKB_AA         | 280          | 1046          | 1.2         |
| UKB_SAS        | 189          | 1269          | 1.28        |
| MGB_AA         | 225          | 1481          | 1.02        |
| MGB_EA         | 2967         | 27957         | 1.03        |
| MGB_HIS        | 100          | 1352          | 0.88        |
| UPenn_EA       | 380          | 6210          | 1.04        |
| UPenn_AA       | 203          | 1719          | 1.09        |
| FARIVE_EA      | 545          | 532           | 1.16        |
| BioME_EA       | 200          | 8007          | 1           |
| BioME_AA       | 382          | 6074          | 0.98        |
| BioME_HIS      | 397          | 8992          | 0.85        |
| RETROVE_EA     | 400          | 400           | 1           |
| GAIT2_EA       | 85           | 850           | 0.96        |
| MESA_EA        | 94           | 2341          | 0.8         |
| MESA_AA        | 72           | 1511          | 1.02        |
| MESA_HIS       | 35           | 1389          | 0.59        |
| <b>Overall</b> | <b>70626</b> | <b>959593</b> | <b>1.05</b> |

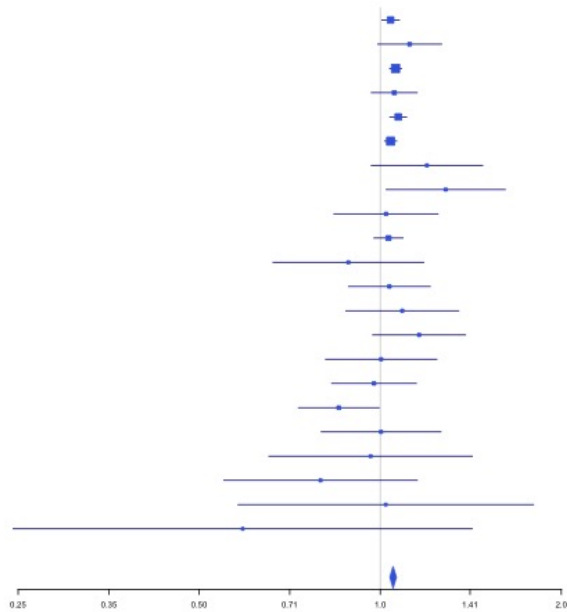

Supplementary Figure 2.89 – rs6503222 (chr17:1977862) in locus 112 (SMG6)

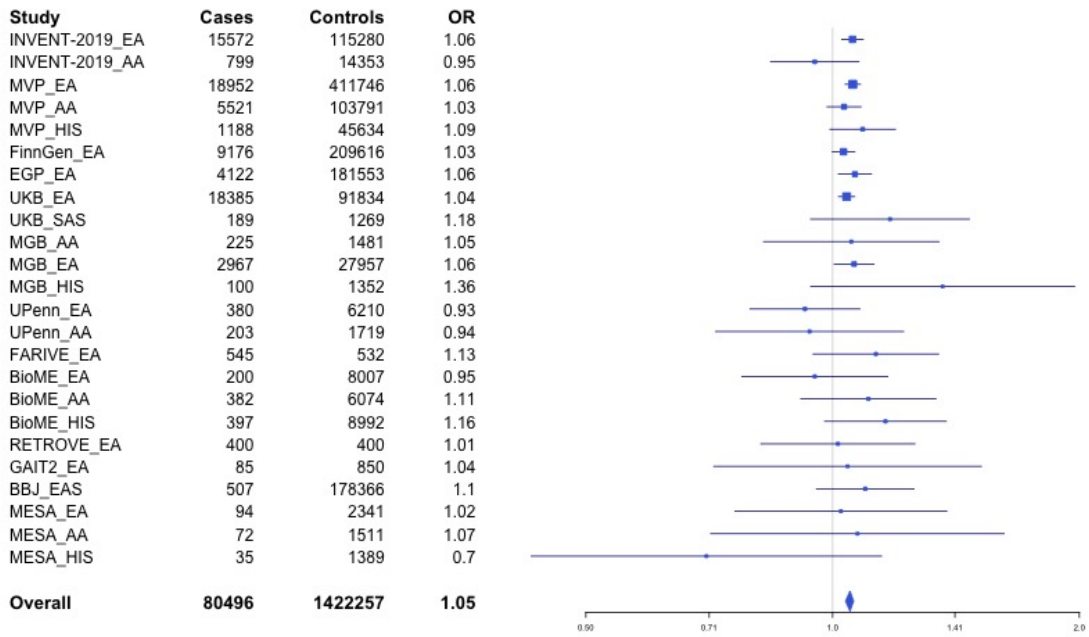

Supplementary Figure 2.90 – rs434473 (chr17:6904934) in locus 113 (ALOX12)

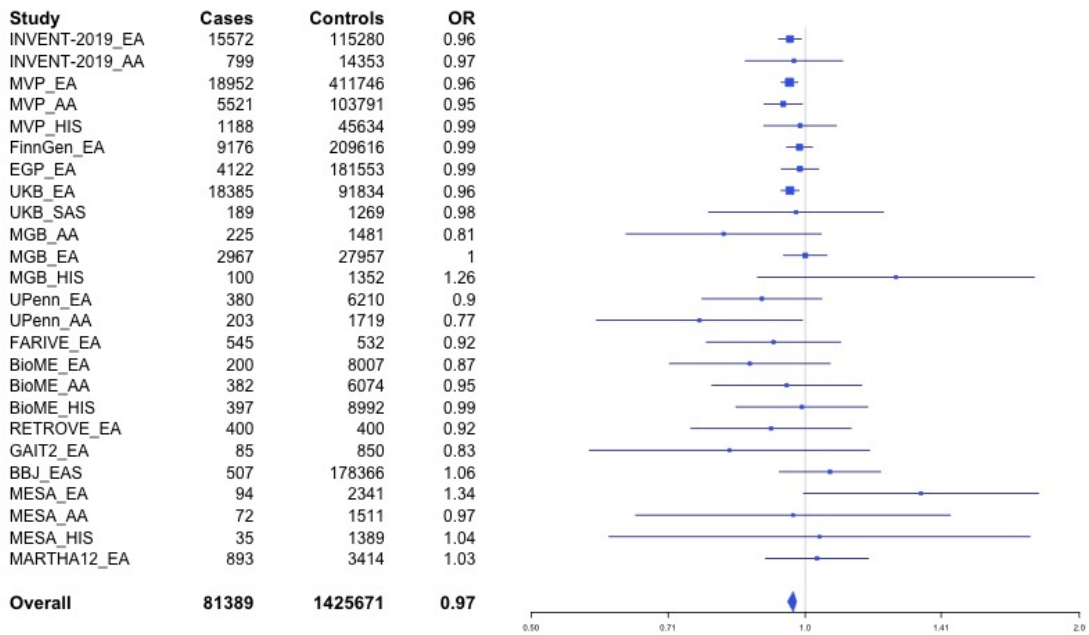

Supplementary Figure 2.91 – rs71138827 (chr17:27833678) in locus 114 (TAOK1)

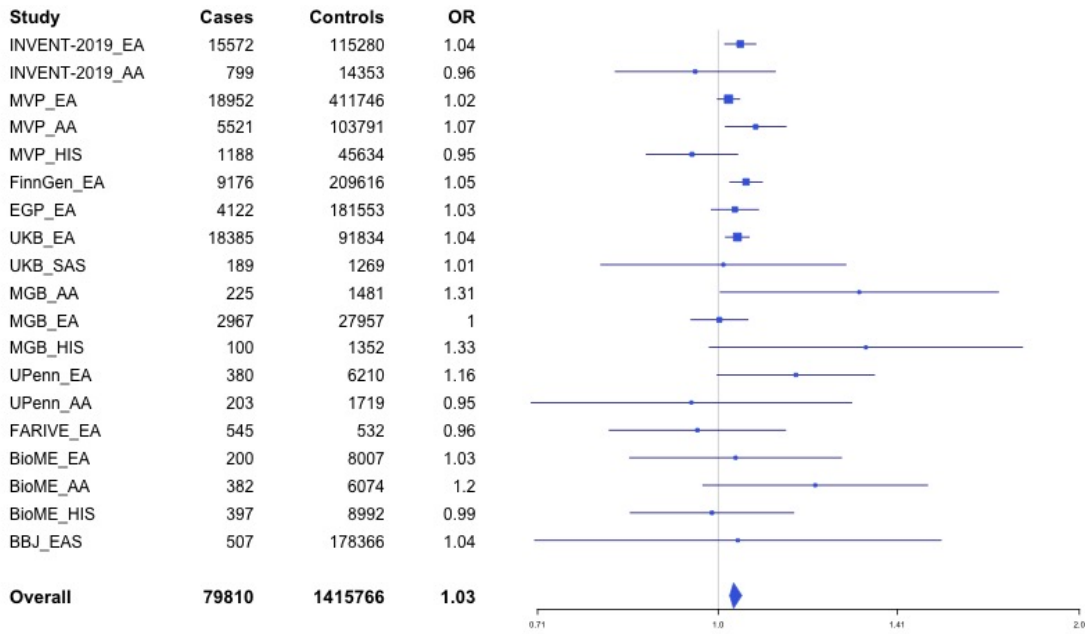

Supplementary Figure 2.92 – rs62054822 (chr17:43927708) in locus 115 (MAPT-AS1)

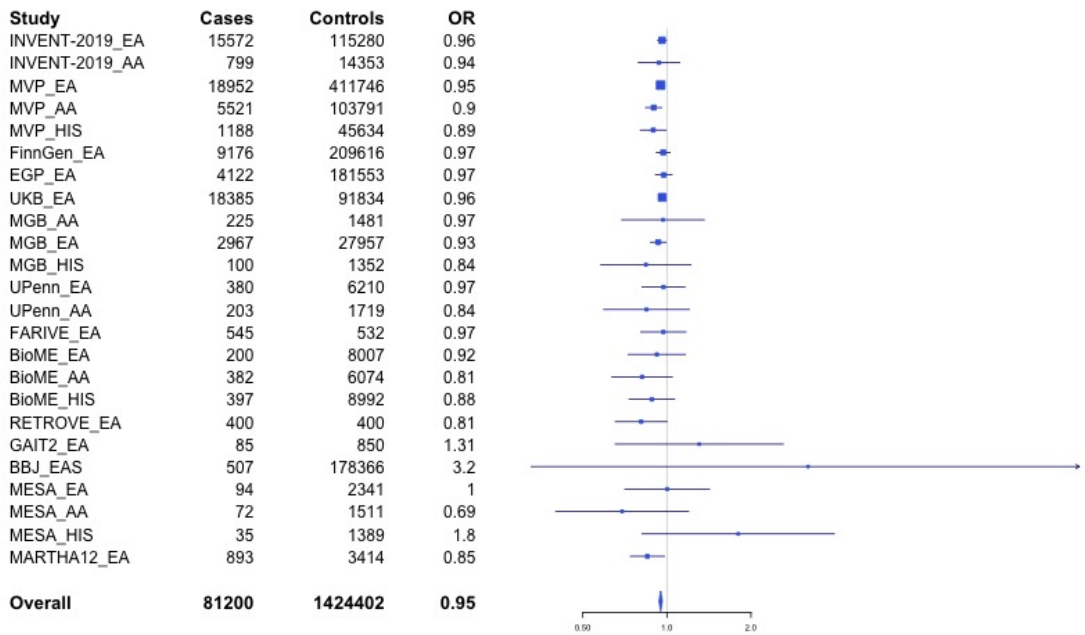

Supplementary Figure 2.93 – rs1801690 (chr17:64208285) in locus 116 (APOH)

| Study          | Cases        | Controls       | OR          |
|----------------|--------------|----------------|-------------|
| INVENT-2019_EA | 15572        | 115280         | 1.03        |
| MVP_EA         | 18952        | 411746         | 1.11        |
| MVP_AA         | 5521         | 103791         | 1.01        |
| MVP_HIS        | 1188         | 45634          | 0.95        |
| FinnGen_EA     | 9176         | 209616         | 1.11        |
| EGP_EA         | 4122         | 181553         | 1.04        |
| UKB_EA         | 18385        | 91834          | 1.04        |
| MGB_AA         | 225          | 1481           | 1.13        |
| MGB_EA         | 2967         | 27957          | 0.97        |
| MGB_HIS        | 100          | 1352           | 1.42        |
| UPenn_EA       | 380          | 6210           | 1.04        |
| UPenn_AA       | 203          | 1719           | 1.56        |
| FARIVE_EA      | 545          | 532            | 1.3         |
| BioME_EA       | 200          | 8007           | 0.93        |
| BioME_AA       | 382          | 6074           | 2.42        |
| BioME_HIS      | 397          | 8992           | 0.97        |
| RETROVE_EA     | 400          | 400            | 1.46        |
| GAIT2_EA       | 85           | 850            | 1.14        |
| BBJ_EAS        | 507          | 178366         | 1.02        |
| MARTHA12_EA    | 893          | 3414           | 1.33        |
| <b>Overall</b> | <b>80200</b> | <b>1404808</b> | <b>1.07</b> |

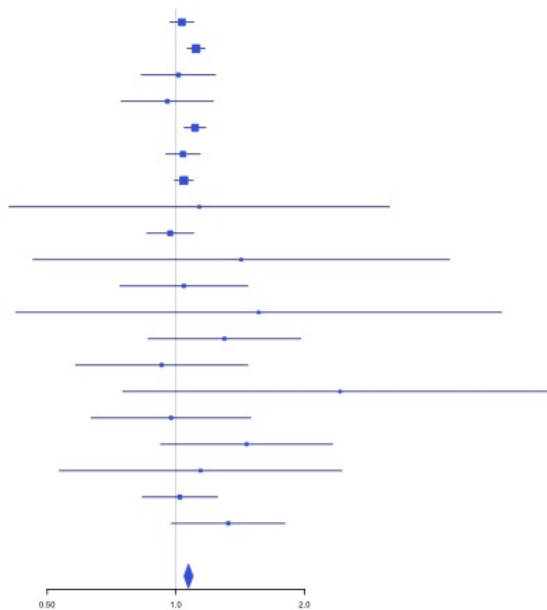

Supplementary Figure 2.94 – rs573431210 (chr17:67276383) in locus 117 (ABCA5)

| Study          | Cases        | Controls       | OR          |
|----------------|--------------|----------------|-------------|
| INVENT-2019_EA | 15572        | 115280         | 1.14        |
| MVP_EA         | 18952        | 411746         | 0.88        |
| MVP_AA         | 5521         | 103791         | 0.76        |
| MVP_HIS        | 1188         | 45634          | 0.94        |
| FinnGen_EA     | 9176         | 209616         | 0.95        |
| EGP_EA         | 4122         | 181553         | 0.69        |
| UKB_EA         | 18385        | 91834          | 0.82        |
| MGB_EA         | 2967         | 27957          | 0.93        |
| MGB_HIS        | 100          | 1352           | 0.98        |
| UPenn_EA       | 380          | 6210           | 1.24        |
| UPenn_AA       | 203          | 1719           | 2.23        |
| FARIVE_EA      | 545          | 532            | 0.52        |
| BioME_EA       | 200          | 8007           | 1.19        |
| BioME_AA       | 382          | 6074           | 0.82        |
| BioME_HIS      | 397          | 8992           | 0.67        |
| MARTHA12_EA    | 893          | 3414           | 0.71        |
| <b>Overall</b> | <b>78983</b> | <b>1223711</b> | <b>0.87</b> |

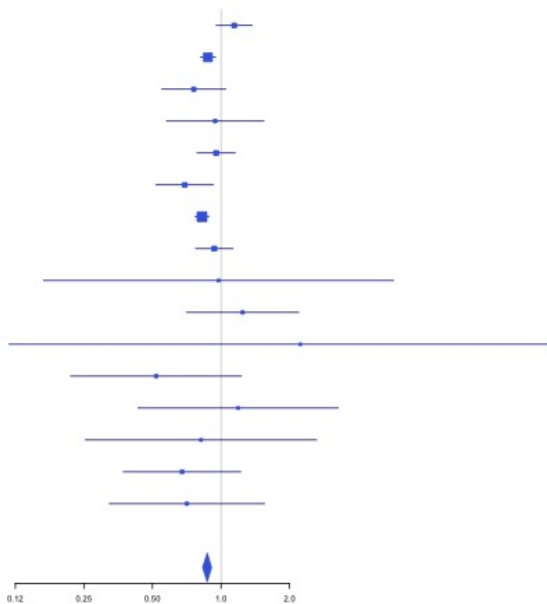



Supplementary Figure 2.95 – rs59277920 (chr19:6077231) in locus 118 (RFX2)

| Study          | Cases        | Controls       | OR          |
|----------------|--------------|----------------|-------------|
| INVENT-2019_EA | 15572        | 115280         | 0.97        |
| INVENT-2019_AA | 799          | 14353          | 0.92        |
| MVP_EA         | 18952        | 411746         | 0.92        |
| MVP_AA         | 5521         | 103791         | 0.93        |
| MVP_HIS        | 1188         | 45634          | 0.97        |
| FinnGen_EA     | 9176         | 209616         | 0.98        |
| EGP_EA         | 4122         | 181553         | 0.94        |
| UKB_EA         | 18385        | 91834          | 0.97        |
| UKB_AA         | 280          | 1046           | 0.92        |
| MGB_AA         | 225          | 1481           | 1.04        |
| MGB_EA         | 2967         | 27957          | 0.97        |
| MGB_HIS        | 100          | 1352           | 1.02        |
| UPenn_EA       | 380          | 6210           | 0.97        |
| UPenn_AA       | 203          | 1719           | 0.81        |
| FARIVE_EA      | 545          | 532            | 0.79        |
| BioME_EA       | 200          | 8007           | 1.02        |
| BioME_AA       | 382          | 6074           | 1.05        |
| BioME_HIS      | 397          | 8992           | 1.04        |
| RETROVE_EA     | 400          | 400            | 0.88        |
| GAIT2_EA       | 85           | 850            | 0.81        |
| BBJ_EAS        | 507          | 178366         | 1.06        |
| MESA_EA        | 94           | 2341           | 0.61        |
| MESA_AA        | 72           | 1511           | 1.16        |
| MESA_HIS       | 35           | 1389           | 0.66        |
| <b>Overall</b> | <b>80587</b> | <b>1422034</b> | <b>0.95</b> |

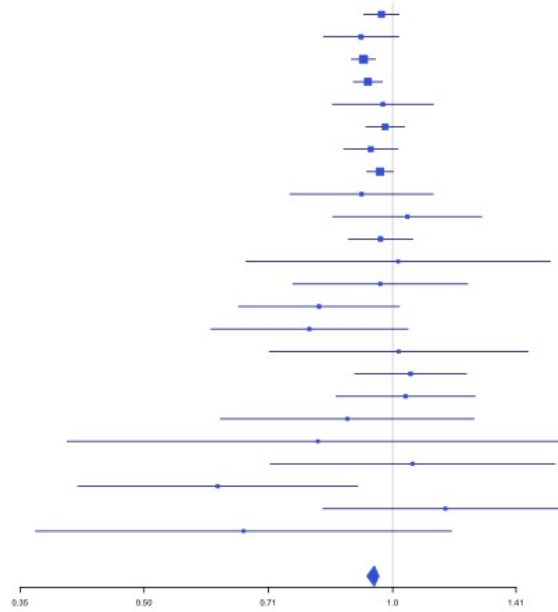

Supplementary Figure 2.96 – rs8110055 (chr19:10739143) in locus 119 (SLC44A2)

| Study          | Cases        | Controls       | OR          |
|----------------|--------------|----------------|-------------|
| INVENT-2019_EA | 15572        | 115280         | 0.9         |
| INVENT-2019_AA | 799          | 14353          | 0.96        |
| MVP_EA         | 18952        | 411746         | 0.88        |
| MVP_AA         | 5521         | 103791         | 0.86        |
| MVP_HIS        | 1188         | 45634          | 0.78        |
| FinnGen_EA     | 9176         | 209616         | 0.87        |
| EGP_EA         | 4122         | 181553         | 0.93        |
| UKB_EA         | 18385        | 91834          | 0.9         |
| UKB_SAS        | 189          | 1269           | 1.24        |
| MGB_AA         | 225          | 1481           | 0.97        |
| MGB_EA         | 2967         | 27957          | 0.93        |
| MGB_HIS        | 100          | 1352           | 0.89        |
| UPenn_EA       | 380          | 6210           | 1.07        |
| UPenn_AA       | 203          | 1719           | 0.76        |
| FARIVE_EA      | 545          | 532            | 0.84        |
| BioME_EA       | 200          | 8007           | 0.89        |
| BioME_AA       | 382          | 6074           | 1.02        |
| BioME_HIS      | 397          | 8992           | 0.93        |
| RETROVE_EA     | 400          | 400            | 0.72        |
| GAIT2_EA       | 85           | 850            | 0.67        |
| BBJ_EAS        | 507          | 178366         | 0.93        |
| MESA_EA        | 94           | 2341           | 0.92        |
| MESA_AA        | 72           | 1511           | 1.29        |
| MESA_HIS       | 35           | 1389           | 0.69        |
| MARTHA12_EA    | 893          | 3414           | 0.87        |
| <b>Overall</b> | <b>81389</b> | <b>1425671</b> | <b>0.89</b> |

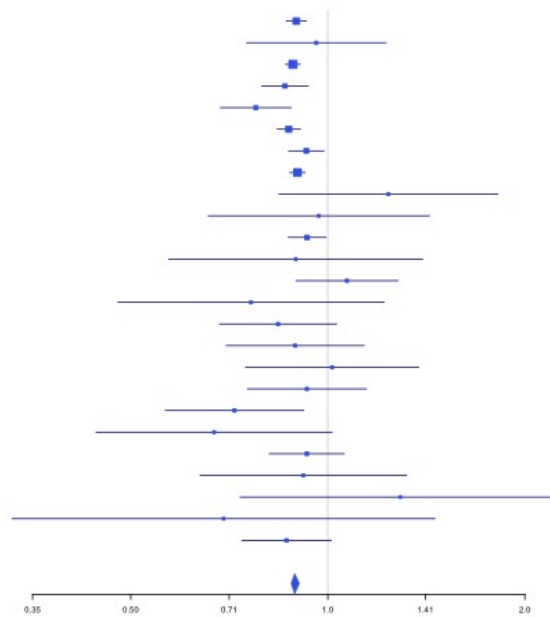

Supplementary Figure 2.97 – rs889139 (chr19:33889369) in locus 120 (PEPD)

| Study          | Cases        | Controls       | OR          |
|----------------|--------------|----------------|-------------|
| INVENT-2019_EA | 15572        | 115280         | 0.97        |
| INVENT-2019_AA | 799          | 14353          | 1.01        |
| MVP_EA         | 18952        | 411746         | 0.98        |
| MVP_AA         | 5521         | 103791         | 0.97        |
| MVP_HIS        | 1188         | 45634          | 0.94        |
| FinnGen_EA     | 9176         | 209616         | 0.97        |
| EGP_EA         | 4122         | 181553         | 0.97        |
| UKB_EA         | 18385        | 91834          | 0.95        |
| UKB_AA         | 280          | 1046           | 1.05        |
| UKB_SAS        | 189          | 1269           | 1.01        |
| MGB_AA         | 225          | 1481           | 1.02        |
| MGB_EA         | 2967         | 27957          | 1           |
| MGB_HIS        | 100          | 1352           | 0.99        |
| UPenn_EA       | 380          | 6210           | 1.05        |
| UPenn_AA       | 203          | 1719           | 1.14        |
| FARIVE_EA      | 545          | 532            | 0.85        |
| RETROVE_EA     | 400          | 400            | 1.08        |
| GAIT2_EA       | 85           | 850            | 1.14        |
| BBJ_EAS        | 507          | 178366         | 0.81        |
| MESA_EA        | 94           | 2341           | 0.94        |
| MESA_AA        | 72           | 1511           | 0.84        |
| MESA_HIS       | 35           | 1389           | 0.72        |
| MARTHA12_EA    | 893          | 3414           | 1.02        |
| <b>Overall</b> | <b>80690</b> | <b>1403644</b> | <b>0.97</b> |

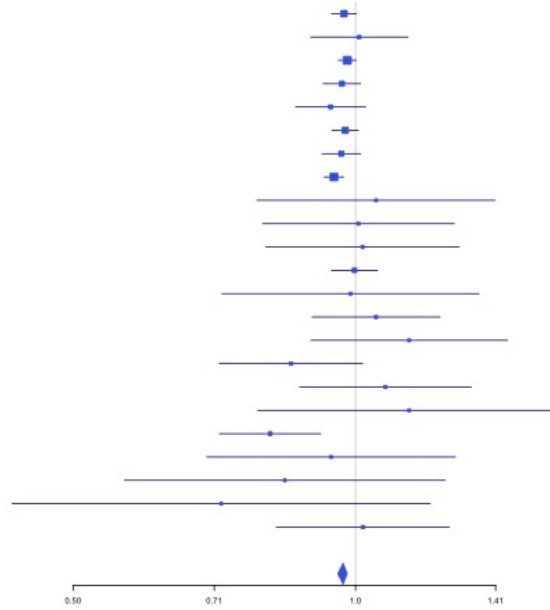

Supplementary Figure 2.98 – rs2545774 (chr19:41287674) in locus 121 (RAB4B)

| Study          | Cases        | Controls       | OR          |
|----------------|--------------|----------------|-------------|
| INVENT-2019_EA | 15572        | 115280         | 0.95        |
| INVENT-2019_AA | 799          | 14353          | 0.95        |
| MVP_EA         | 18952        | 411746         | 0.97        |
| MVP_AA         | 5521         | 103791         | 1           |
| MVP_HIS        | 1188         | 45634          | 1.02        |
| FinnGen_EA     | 9176         | 209616         | 0.94        |
| EGP_EA         | 4122         | 181553         | 0.93        |
| UKB_EA         | 18385        | 91834          | 0.97        |
| UKB_SAS        | 189          | 1269           | 0.86        |
| MGB_AA         | 225          | 1481           | 1           |
| MGB_EA         | 2967         | 27957          | 0.96        |
| MGB_HIS        | 100          | 1352           | 1.08        |
| UPenn_EA       | 380          | 6210           | 0.93        |
| UPenn_AA       | 203          | 1719           | 1.07        |
| FARIVE_EA      | 545          | 532            | 0.78        |
| BioME_EA       | 200          | 8007           | 0.88        |
| BioME_AA       | 382          | 6074           | 1.13        |
| BioME_HIS      | 397          | 8992           | 0.99        |
| RETROVE_EA     | 400          | 400            | 1.26        |
| GAIT2_EA       | 85           | 850            | 1           |
| BBJ_EAS        | 507          | 178366         | 1.06        |
| MESA_EA        | 94           | 2341           | 0.9         |
| MESA_AA        | 72           | 1511           | 0.7         |
| MESA_HIS       | 35           | 1389           | 0.7         |
| <b>Overall</b> | <b>80496</b> | <b>1422257</b> | <b>0.96</b> |

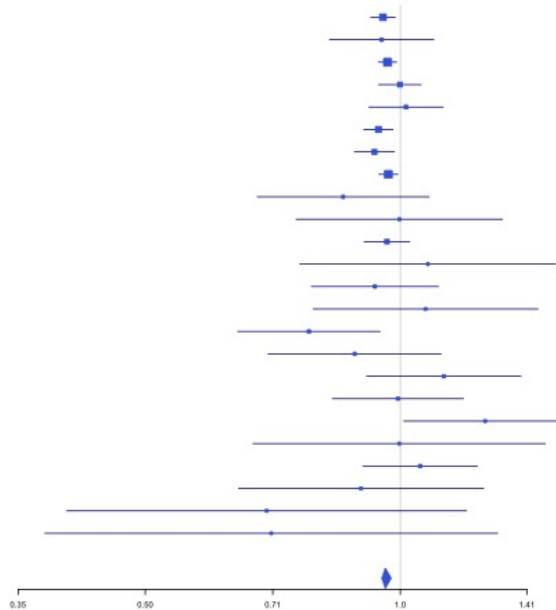

Supplementary Figure 2.99 – rs8108474 (chr19:46301479) in locus 122 (RSPH6A)

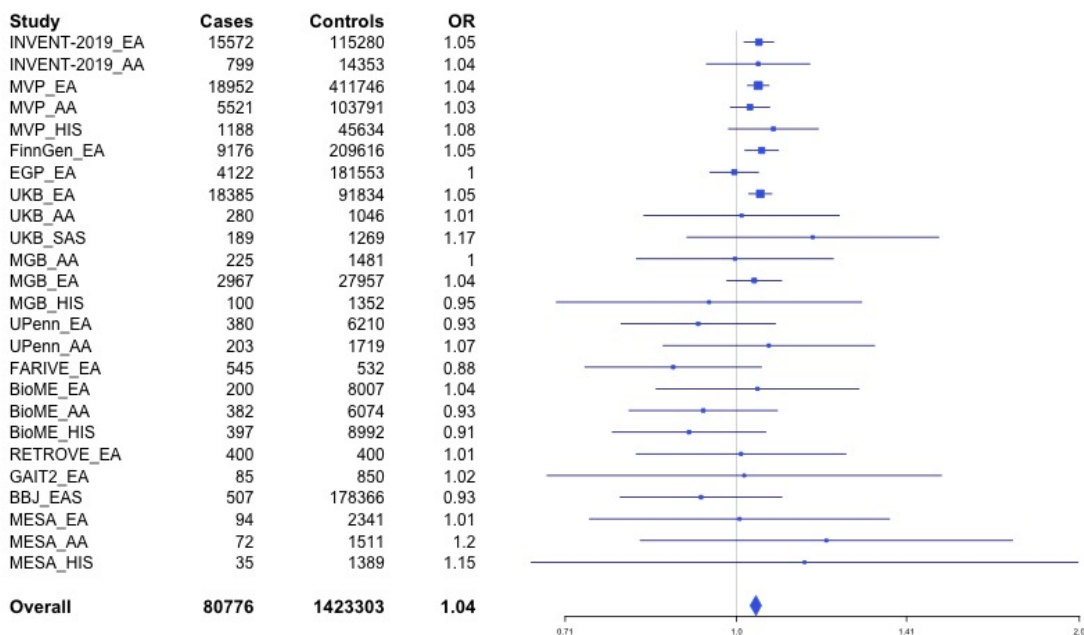

Supplementary Figure 2.100 – rs2638282 (chr19:49213833) in locus 123 (FUT2;MAMSTR)

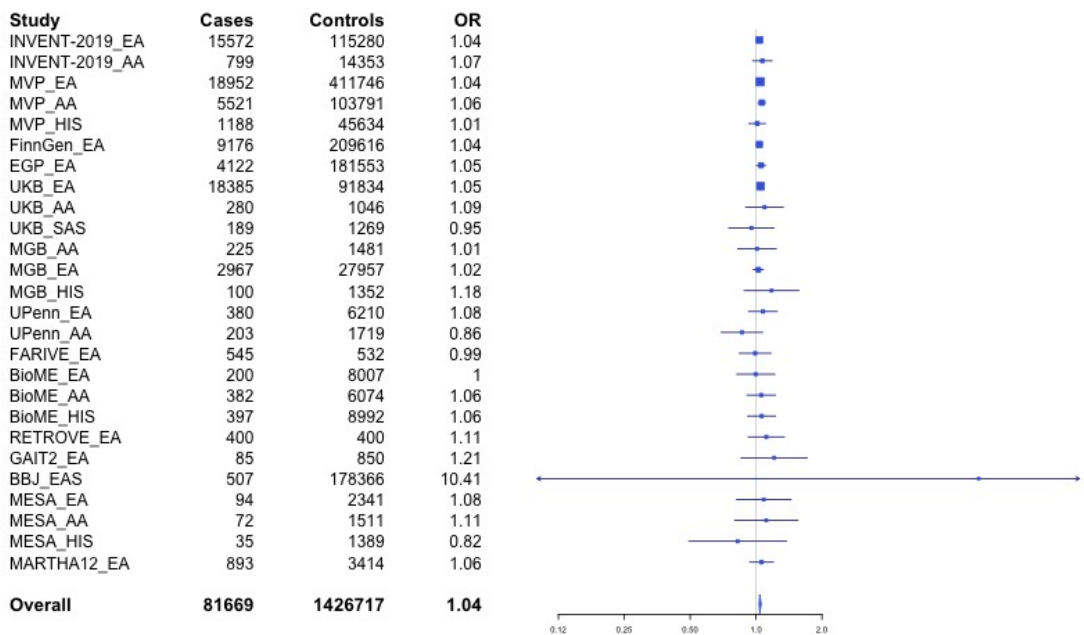

Supplementary Figure 2.101 – rs1654425 (chr19:55538980) in locus 124 (GP6)

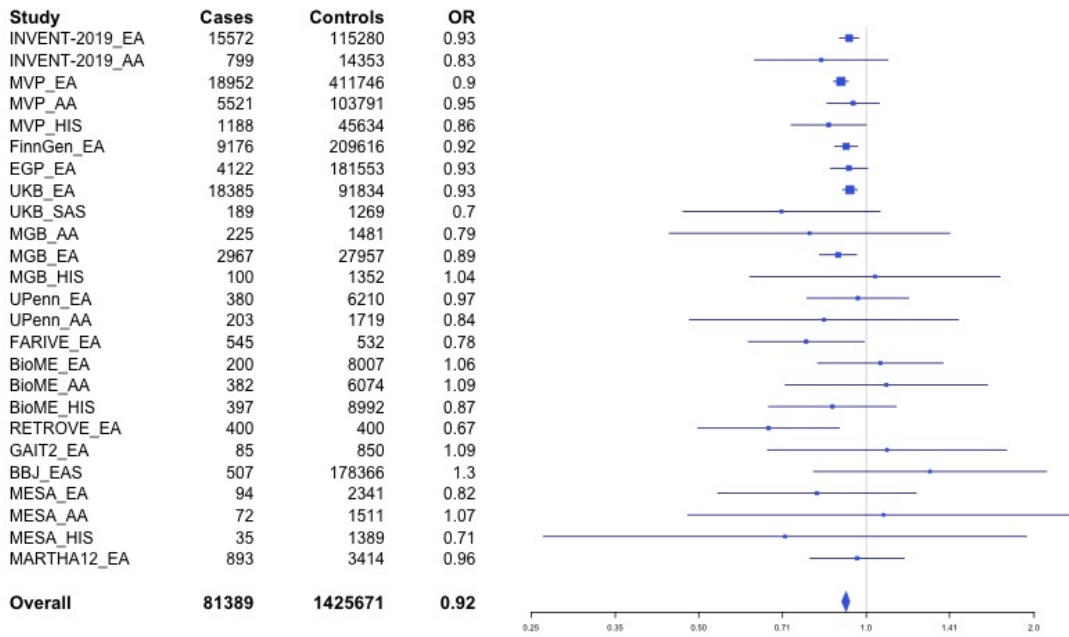

Supplementary Figure 2.102 – rs2631628 (chr19:56645250) in locus 125 (ZNF787;ZNF444)

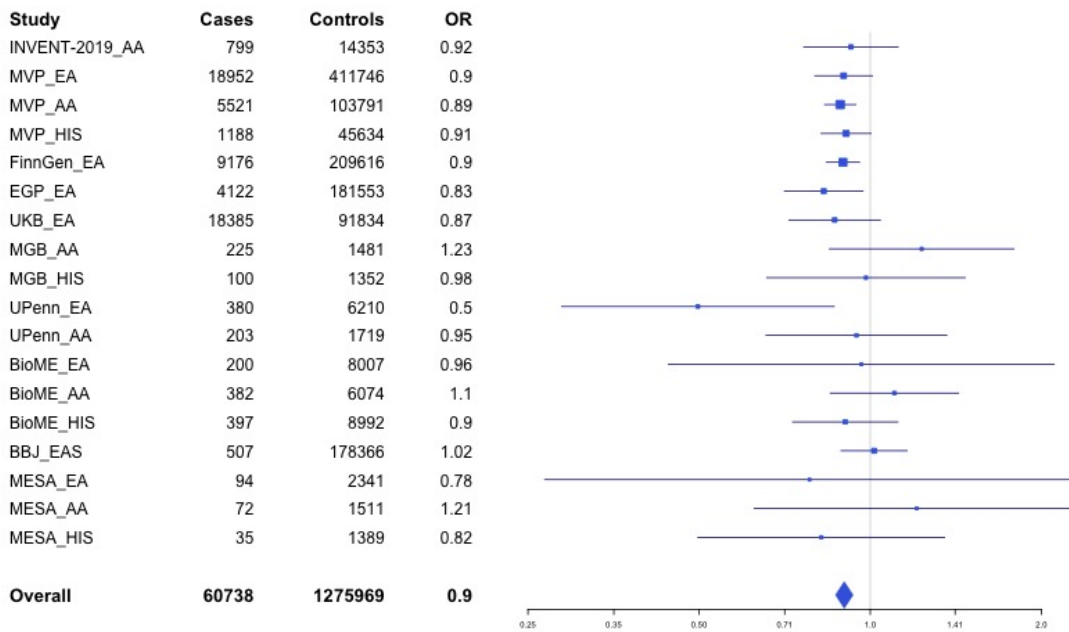

Supplementary Figure 2.103 – rs117390891 (chr20:23168526) in locus 126 (LINC00656;NXT1)

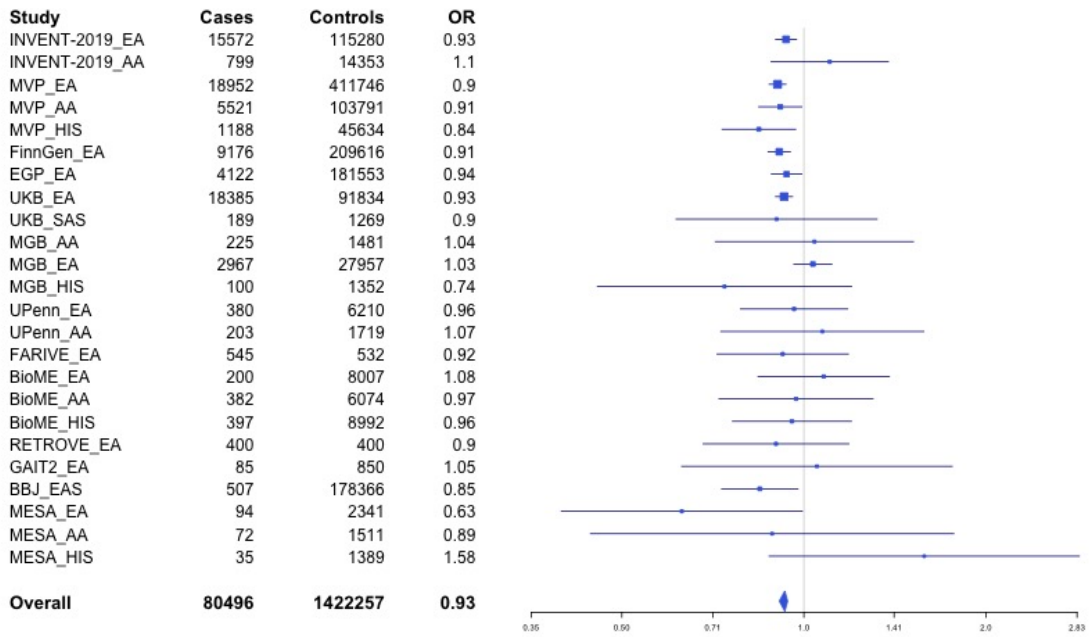

Supplementary Figure 2.104 – rs6060288 (chr20:33772243) in locus 127 (MMP24-AS1-EDEM2)

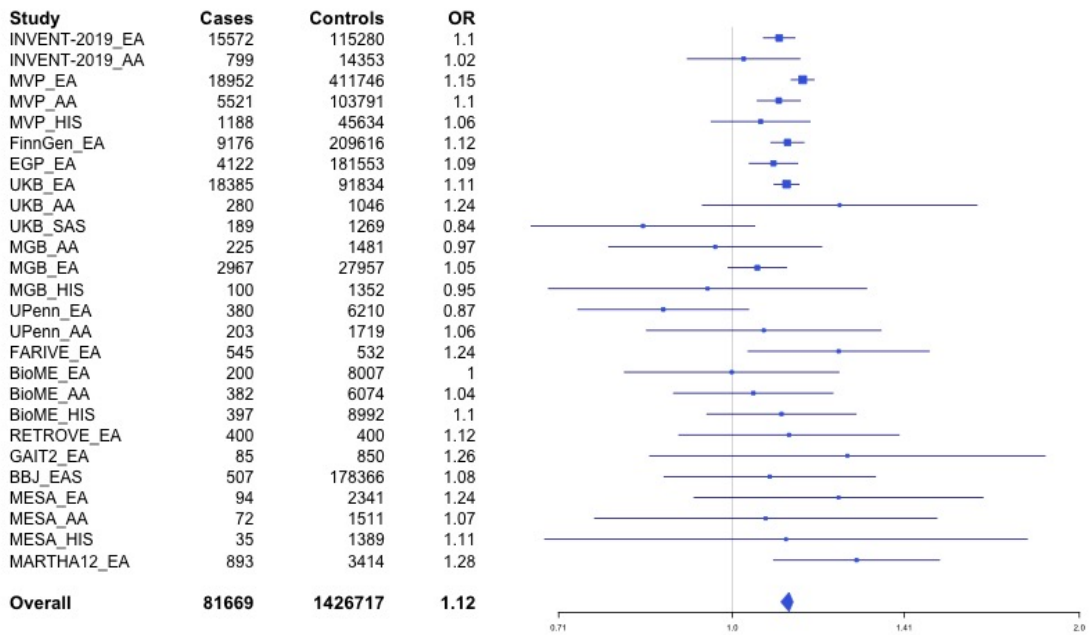

Supplementary Figure 2.105 – rs3070580 (chr22:33165231) in locus 129 (SYN3)

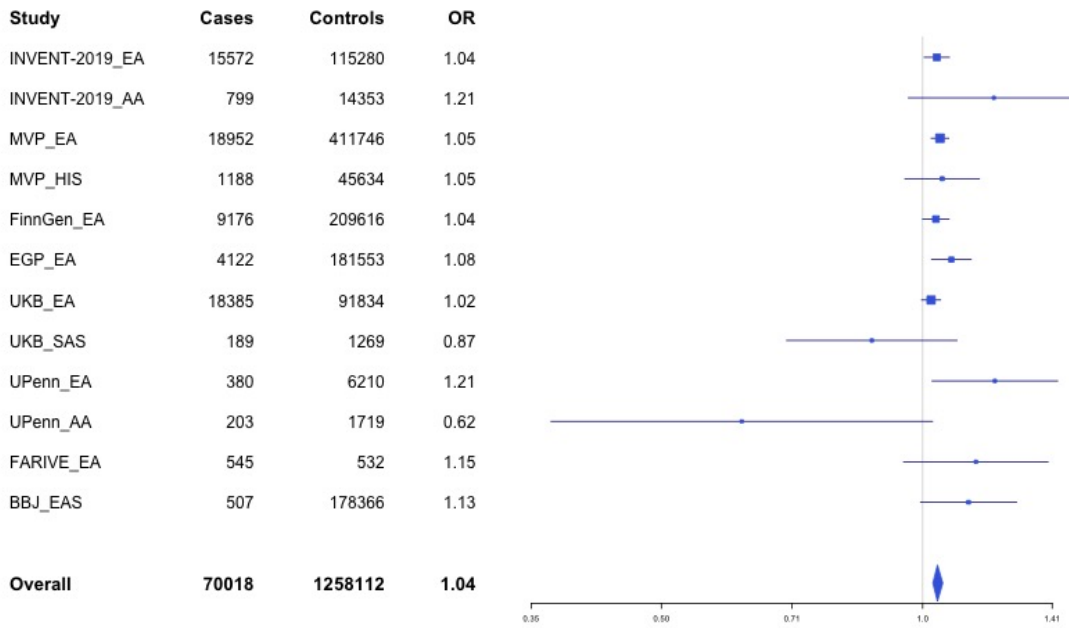

Supplementary Figure 2.106 – rs9611844 (chr22:43115776) in locus 130 (A4GALT)

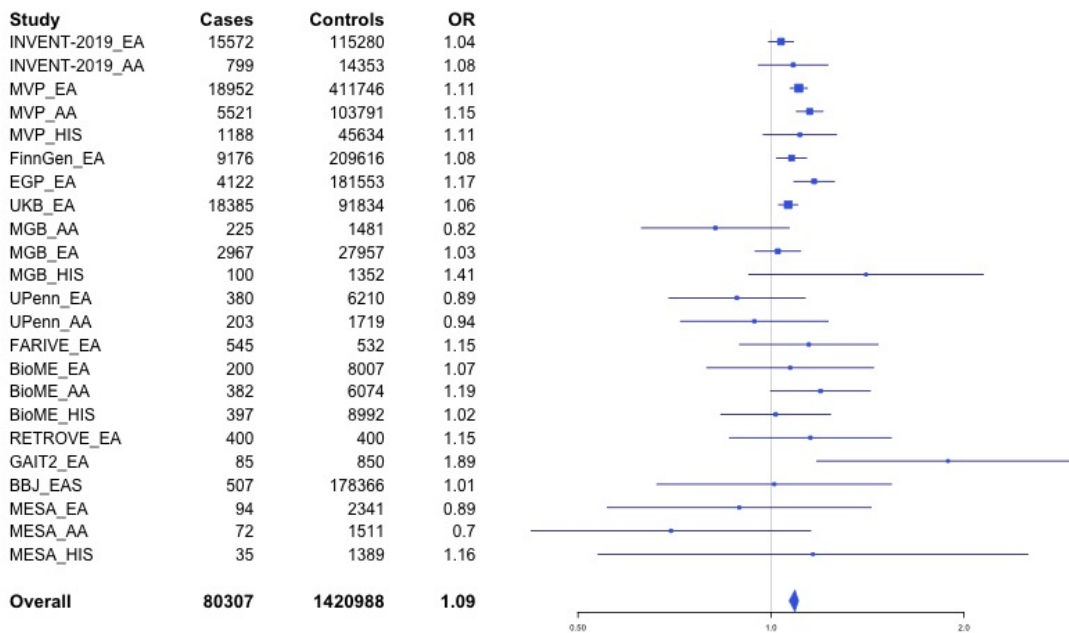

Supplementary Figure 2.107 – rs12388118 (chr23:11380742) in locus 131 (ARHGAP6)

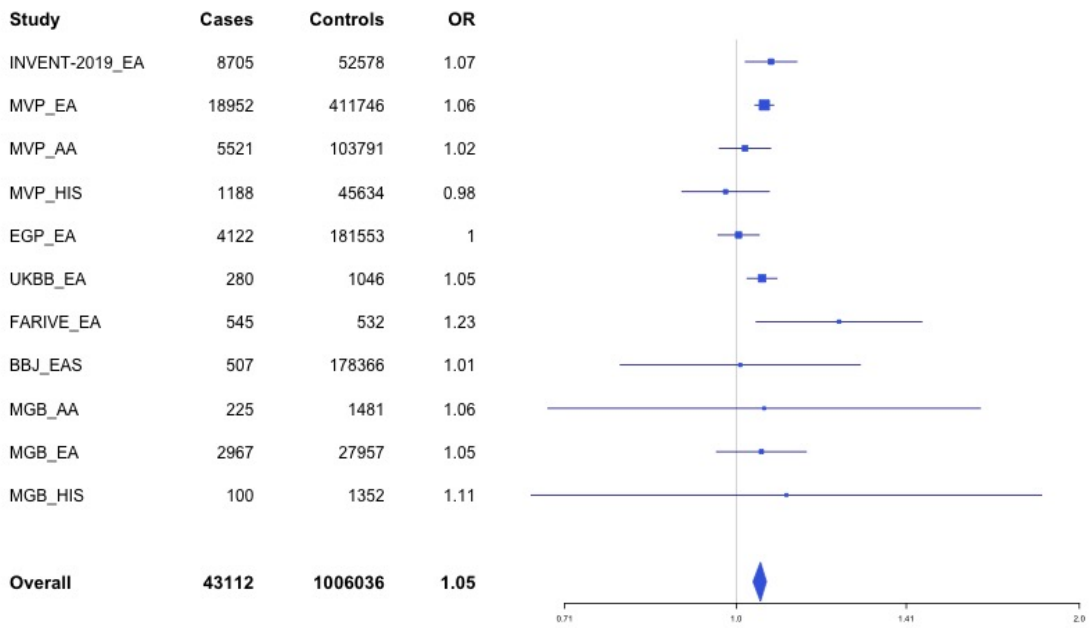

Supplementary Figure 2.108 – rs6632109 (chr23:34894638) in locus 132 (TMEM47;FAM47B)

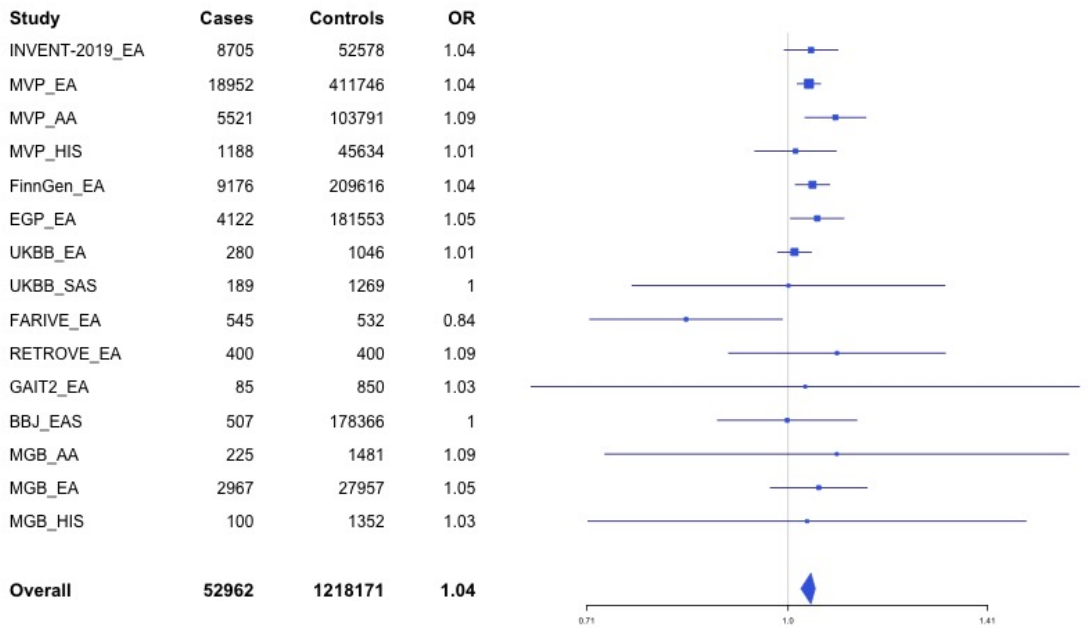



Supplementary Figure 2.109 – rs3002416 (chr23:39710195) in locus 133 (MIR1587;BCOR)

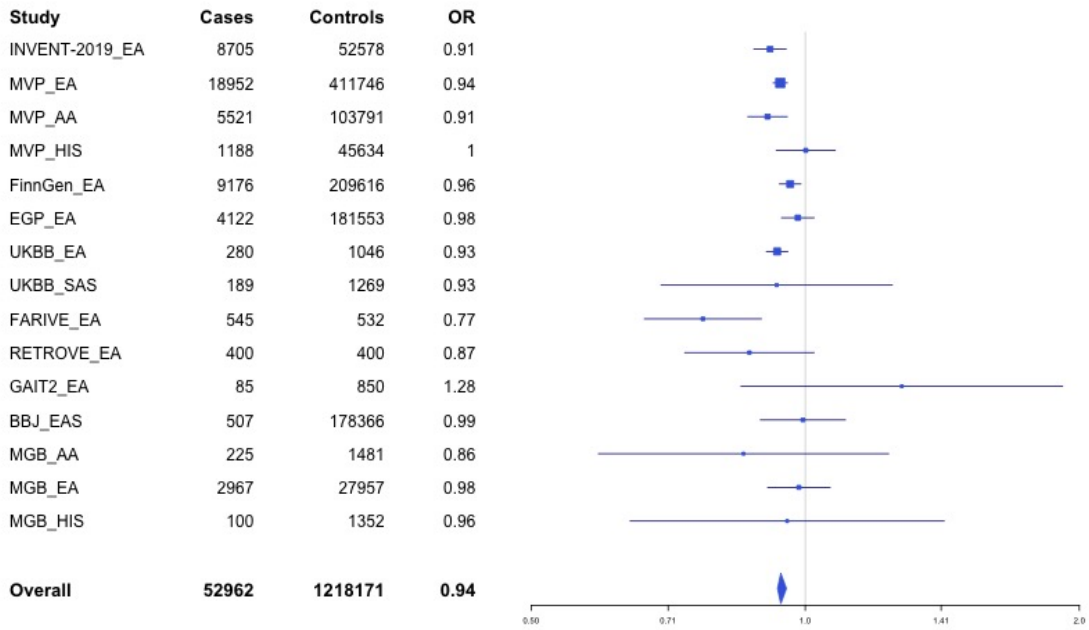

Supplementary Figure 2.110 – rs6048 (chr23:138633280) in locus 134 (F9)

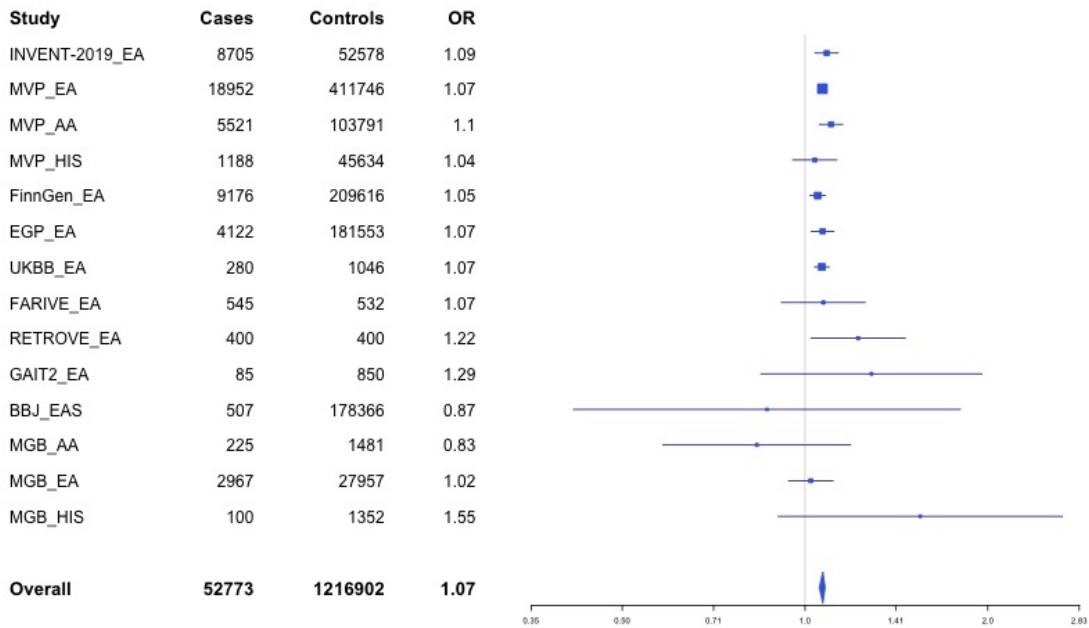

Supplementary Figure 2.111 – rs2084408 (chr23:154346709) in locus 135 (BRCC3)

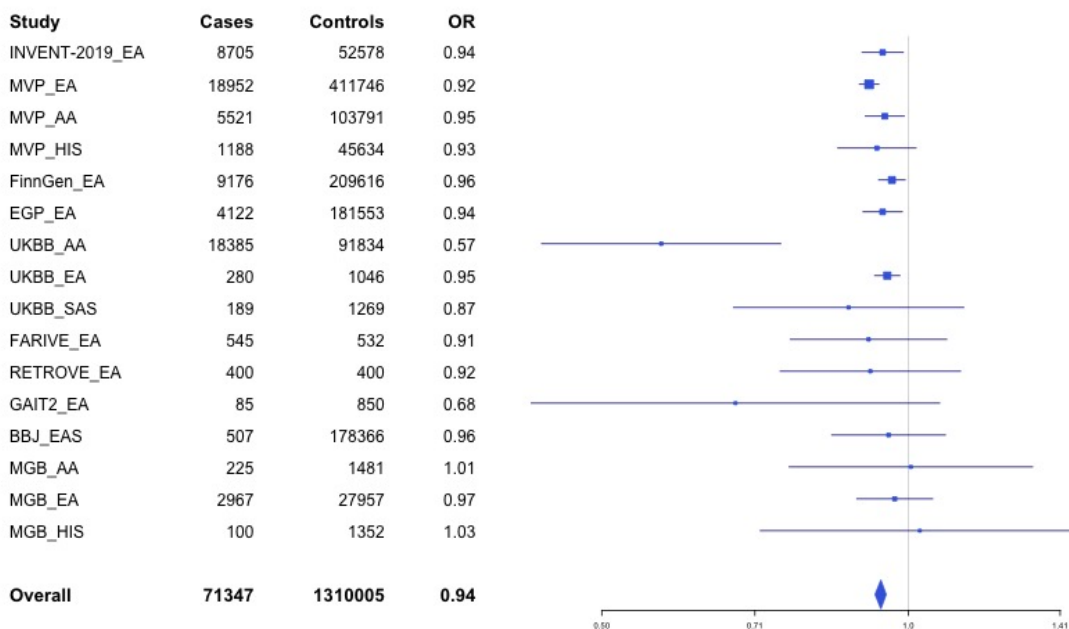

Supplement: Supplementary file [file media-2.pdf]
