# Supplementary material for: Cross-Ancestry Investigation of Venous Thromboembolism Genomic Predictors
Source: bioRxiv or medRxiv preprint supplement (doi:10.1101/2022.03.04.22271003), 2022-03-08

### Supplementary Figure 3.

#### Forest plots of European analysis lead variants.

|      |                                                              |    |
|------|--------------------------------------------------------------|----|
| 3.1  | rs9442571 (chr1:9349611) in locus 1 (H6PD;SPSB1)             | 3  |
| 3.2  | rs551176418 (chr1:27107263) in locus 2 (ARID1A)              | 3  |
| 3.3  | rs12753797 (chr1:77981959) in locus 3 (AK5)                  | 4  |
| 3.4  | rs4970834 (chr1:109814880) in locus 4 (CELSR2)               | 4  |
| 3.5  | rs1775815 (chr1:118148830) in locus 5 (TENT5C)               | 5  |
| 3.6  | rs1267881263 (chr1:150496127) in locus 6 (FALEC;ADAMTSL4)    | 5  |
| 3.7  | rs76798800 (chr1:154994978) in locus 7 (DCST2)               | 6  |
| 3.8  | rs3557 (chr1:161188893) in locus 8 (FCER1G)                  | 6  |
| 3.9  | rs6025 (chr1:169519049) in locus 9 (F5)                      | 7  |
| 3.10 | rs4540639 (chr1:192104320) in locus 11 (LINC01680;RGS18)     | 7  |
| 3.11 | rs2842700 (chr1:207282149) in locus 13 (C4BPA)               | 8  |
| 3.12 | rs3811444 (chr1:248039451) in locus 14 (TRIM58)              | 8  |
| 3.13 | rs1867312 (chr2:68619981) in locus 17 (PLEK)                 | 9  |
| 3.14 | rs1158867 (chr2:128177377) in locus 18 (PROC)                | 9  |
| 3.15 | rs1912846 (chr2:188325444) in locus 19 (CALCRL;TFPI)         | 10 |
| 3.16 | rs78872368 (chr2:198545250) in locus 20 (RFTN2;MARS2)        | 10 |
| 3.17 | rs1047891 (chr2:211540507) in locus 21 (CPS1)                | 11 |
| 3.18 | rs13412535 (chr2:224874874) in locus 22 (SERPINE2)           | 11 |
| 3.19 | rs13084580 (chr3:39188182) in locus 24 (CSRNP1)              | 12 |
| 3.20 | rs11130326 (chr3:52771920) in locus 25 (NEK4)                | 12 |
| 3.21 | rs9866664 (chr3:90437988) in locus 26 (EPHA3;NONE)           | 13 |
| 3.22 | rs28479320 (chr3:93752529) in locus 27 (ARL13B)              | 13 |
| 3.23 | rs9854955 (chr3:156795525) in locus 30 (LEKR1;LINC00880)     | 14 |
| 3.24 | rs710446 (chr3:186459927) in locus 32 (KNG1)                 | 14 |
| 3.25 | rs3796159 (chr3:194790434) in locus 33 (XXYLT1)              | 15 |
| 3.26 | rs72976751 (chr4:86725959) in locus 37 (ARHGAP24)            | 15 |
| 3.27 | rs35225200 (chr4:103146888) in locus 38 (BANK1;SLC39A8)      | 16 |
| 3.28 | rs2066864 (chr4:155525695) in locus 39 (FGG)                 | 16 |
| 3.29 | rs3756011 (chr4:187206249) in locus 40 (F11)                 | 17 |
| 3.30 | rs112367053 (chr5:28379046) in locus 41 (LINC02103;LSP1P3)   | 17 |
| 3.31 | rs16867574 (chr5:38708554) in locus 42 (OSMR-AS1)            | 18 |
| 3.32 | rs4235677 (chr5:72925091) in locus 43 (ARHGEF28)             | 18 |
| 3.33 | rs251339 (chr5:96235038) in locus 44 (ERAP2)                 | 19 |
| 3.34 | rs147133967 (chr5:132426851) in locus 45 (HSPA4)             | 19 |
| 3.35 | rs214059 (chr6:25536937) in locus 46 (CARMIL1)               | 20 |
| 3.36 | rs2394251 (chr6:29943688) in locus 47 (HCG9)                 | 20 |
| 3.37 | rs28383307 (chr6:32586755) in locus 48 (HLA-DRB1;HLA-DQA1)   | 21 |
| 3.38 | rs145294670 (chr6:34622561) in locus 49 (ILRUN)              | 21 |
| 3.39 | rs2754251 (chr6:88385949) in locus 51 (AKIRIN2)              | 22 |
| 3.40 | rs9390460 (chr6:147694334) in locus 52 (STXBP5)              | 22 |
| 3.41 | rs1513275 (chr7:28259233) in locus 53 (JAZF1-AS1)            | 23 |
| 3.42 | rs370720 (chr8:9168146) in locus 57 (LOC101929128;LOC157273) | 23 |
| 3.43 | rs2726950 (chr8:27806764) in locus 60 (SCARA5)               | 24 |
| 3.44 | rs6993770 (chr8:106581528) in locus 62 (ZFPM2)               | 24 |
| 3.45 | rs1491336705 (chr8:108295235) in locus 63 (ANGPT1)           | 25 |
| 3.46 | rs10820606 (chr9:99192919) in locus 65 (ZNF367;HABP4)        | 25 |
| 3.47 | rs687289 (chr9:136137106) in locus 66 (ABO)                  | 26 |
| 3.48 | rs1243184 (chr10:21931937) in locus 68 (MLLT10)              | 26 |
| 3.49 | rs10763665 (chr10:28771491) in locus 70 (LINC02652)          | 27 |
| 3.50 | rs78707713 (chr10:71245276) in locus 72 (TSPAN15)            | 27 |

|       |                                                                  |    |
|-------|------------------------------------------------------------------|----|
| 3.51  | rs57866767 (chr10:96023077) in locus 74 (PLCE1)                  | 28 |
| 3.52  | rs10886430 (chr10:121010256) in locus 75 (GRK5)                  | 28 |
| 3.53  | rs7122100 (chr11:10732560) in locus 76 (IRAG1;CTR9)              | 29 |
| 3.54  | rs12800654 (chr11:16243320) in locus 77 (SOX6)                   | 29 |
| 3.55  | rs4755476 (chr11:32980428) in locus 78 (QSER1)                   | 30 |
| 3.56  | rs1799963 (chr11:46761055) in locus 79 (F2)                      | 30 |
| 3.57  | rs141798115 (chr11:56875074) in locus 80 (OR5AK4P;LRRC55)        | 31 |
| 3.58  | rs55777218 (chr11:60070946) in locus 81 (MS4A4A)                 | 31 |
| 3.59  | rs174551 (chr11:61573684) in locus 82 (FADS1)                    | 32 |
| 3.60  | rs1145656 (chr11:73305859) in locus 83 (FAM168A)                 | 32 |
| 3.61  | rs1997547 (chr11:114002744) in locus 84 (ZBTB16)                 | 33 |
| 3.62  | rs35257264 (chr11:126296816) in locus 85 (ST3GAL4)               | 33 |
| 3.63  | rs7135039 (chr12:6160614) in locus 87 (VWF)                      | 34 |
| 3.64  | rs7311483 (chr12:9053661) in locus 88 (A2ML1;PHC1)               | 34 |
| 3.65  | rs4759076 (chr12:54729872) in locus 89 (COPZ1)                   | 35 |
| 3.66  | rs142351376 (chr12:104136288) in locus 90 (STAB2)                | 35 |
| 3.67  | rs56750693 (chr12:112144586) in locus 91 (ACAD10)                | 36 |
| 3.68  | rs2851436 (chr12:123667354) in locus 92 (MPHOSPH9)               | 36 |
| 3.69  | rs3211752 (chr13:113787459) in locus 94 (F10)                    | 37 |
| 3.70  | rs8004077 (chr14:58846731) in locus 95 (ARID4A;TOMM20L)          | 37 |
| 3.71  | rs2127869 (chr14:65794352) in locus 96 (LINC02324;MIR4708)       | 38 |
| 3.72  | rs61990092 (chr14:92289301) in locus 97 (TC2N)                   | 38 |
| 3.73  | rs28929474 (chr14:94844947) in locus 98 (SERPINA1)               | 39 |
| 3.74  | rs4906229 (chr14:103057511) in locus 99 (LINC02323;RCOR1)        | 39 |
| 3.75  | rs141866277 (chr15:43950699) in locus 100 (PIIP5K1P1-CATSPER2)   | 40 |
| 3.76  | rs340009 (chr15:60899639) in locus 101 (RORA-AS1)                | 40 |
| 3.77  | rs7183672 (chr15:96101018) in locus 103 (LINC00924;LOC105369212) | 41 |
| 3.78  | rs12443808 (chr16:30996871) in locus 106 (HSD3B7)                | 41 |
| 3.79  | rs1346057617 (chr16:75434183) in locus 108 (CFDP1)               | 42 |
| 3.80  | rs62044142 (chr16:81868968) in locus 109 (PLCG2)                 | 42 |
| 3.81  | rs28634651 (chr16:88553198) in locus 111 (ZFPM1)                 | 43 |
| 3.82  | rs4790311 (chr17:1979188) in locus 112 (SMG6)                    | 43 |
| 3.83  | rs11078659 (chr17:6903944) in locus 113 (ALOX12-AS1)             | 44 |
| 3.84  | rs536327 (chr17:27857698) in locus 114 (TAOK1)                   | 44 |
| 3.85  | rs9468 (chr17:44101563) in locus 115 (MAPT)                      | 45 |
| 3.86  | rs1801690 (chr17:64208285) in locus 116 (APOH)                   | 45 |
| 3.87  | rs573431210 (chr17:67276383) in locus 117 (ABCA5)                | 46 |
| 3.88  | rs8109681 (chr19:10738836) in locus 119 (SLC44A2)                | 46 |
| 3.89  | rs2545774 (chr19:41287674) in locus 121 (RAB4B)                  | 47 |
| 3.90  | rs8108474 (chr19:46301479) in locus 122 (RSPH6A)                 | 47 |
| 3.91  | rs646327 (chr19:49209851) in locus 123 (FUT2)                    | 48 |
| 3.92  | rs1654425 (chr19:55538980) in locus 124 (GP6)                    | 48 |
| 3.93  | rs117390891 (chr20:23168526) in locus 126 (LINC00656;NXT1)       | 49 |
| 3.94  | rs6087685 (chr20:33777612) in locus 127 (MMP24-AS1-EDEM2)        | 49 |
| 3.95  | rs3070580 (chr22:33165231) in locus 129 (SYN3)                   | 50 |
| 3.96  | rs9611844 (chr22:43115776) in locus 130 (A4GALT)                 | 50 |
| 3.97  | rs12388118 (chr23:11380742) in locus 131 (ARHGAP6)               | 51 |
| 3.98  | rs3002416 (chr23:39710195) in locus 133 (MIR1587;BCOR)           | 51 |
| 3.99  | rs6048 (chr23:138633280) in locus 134 (F9)                       | 52 |
| 3.100 | rs4898406 (chr23:154273269) in locus 135 (FUNDC2)                | 52 |

Supplementary Figure 3.1 – rs9442571 (chr1:9349611) in locus 1 (H6PD;SPSB1)

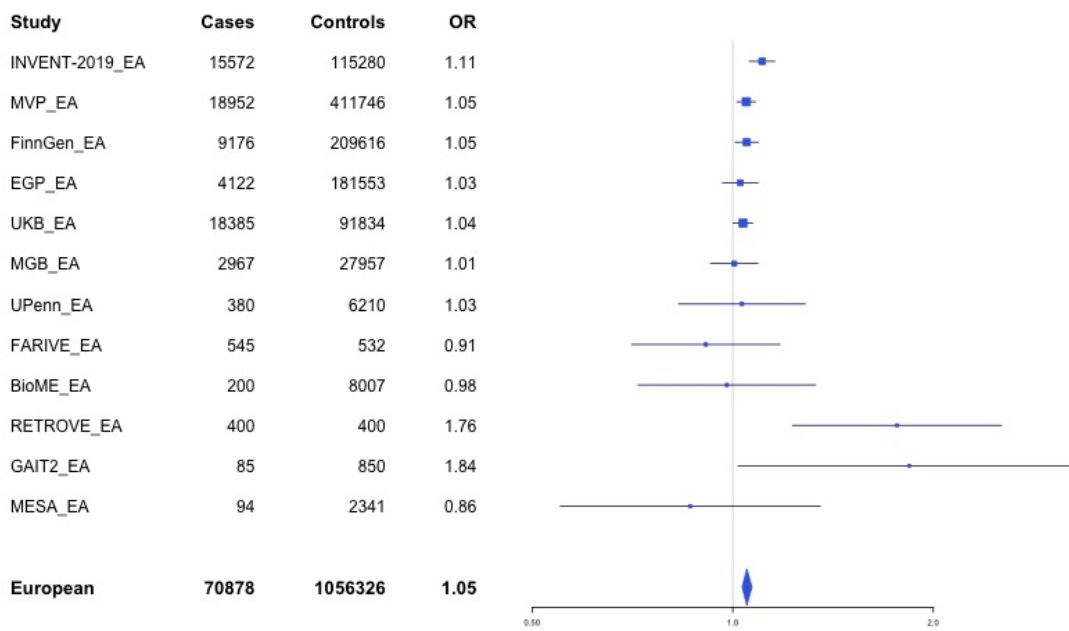

Supplementary Figure 3.2 – rs551176418 (chr1:27107263) in locus 2 (ARID1A)

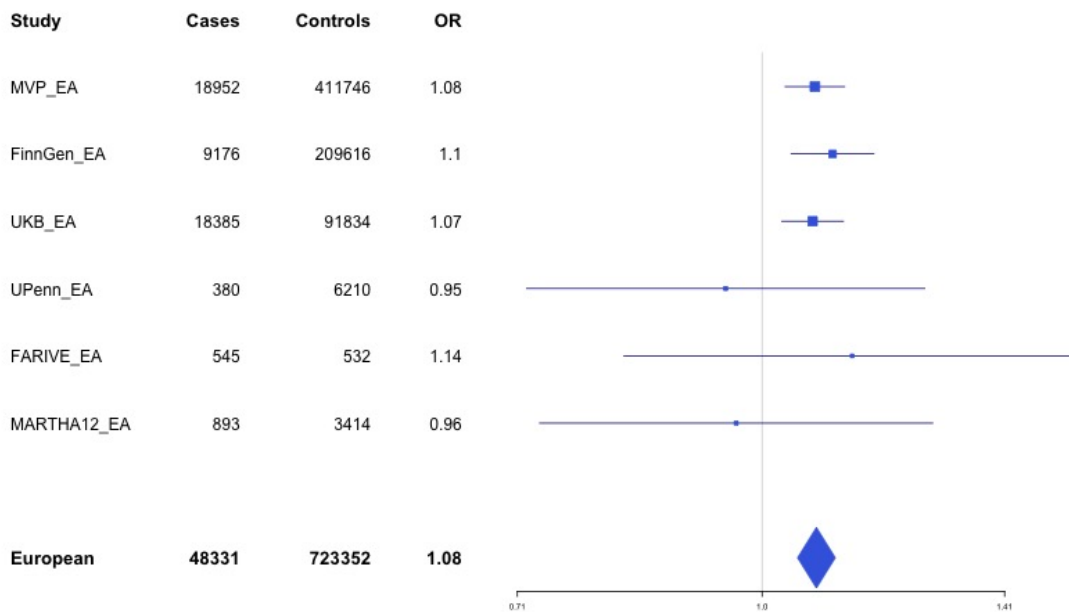

Supplementary Figure 3.3 – rs12753797 (chr1:77981959) in locus 3 (AK5)

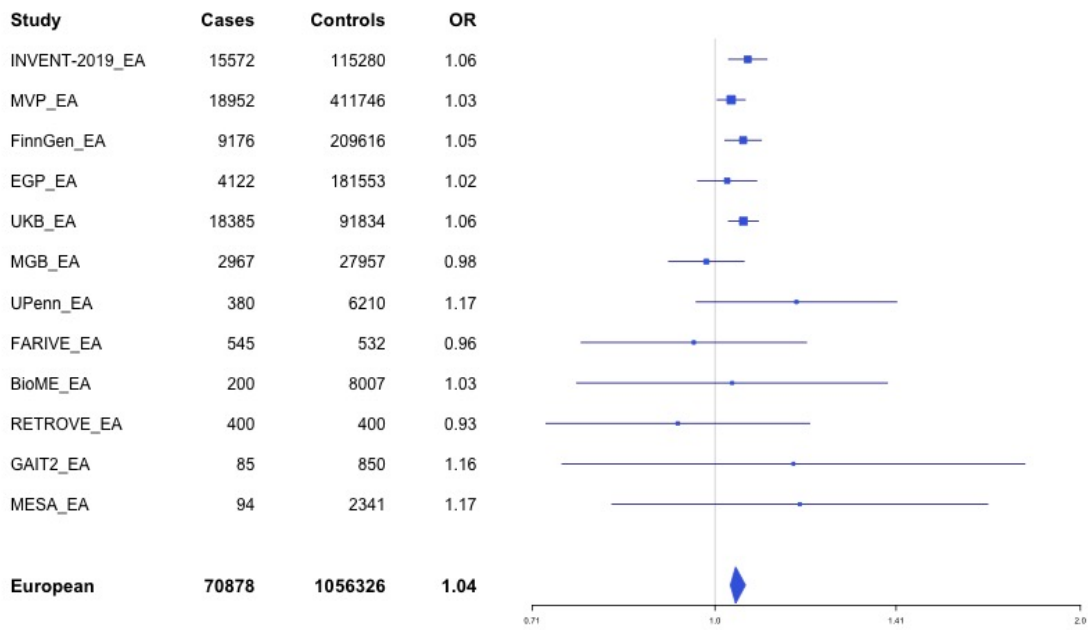

Supplementary Figure 3.4 – rs4970834 (chr1:109814880) in locus 4 (CELSR2)

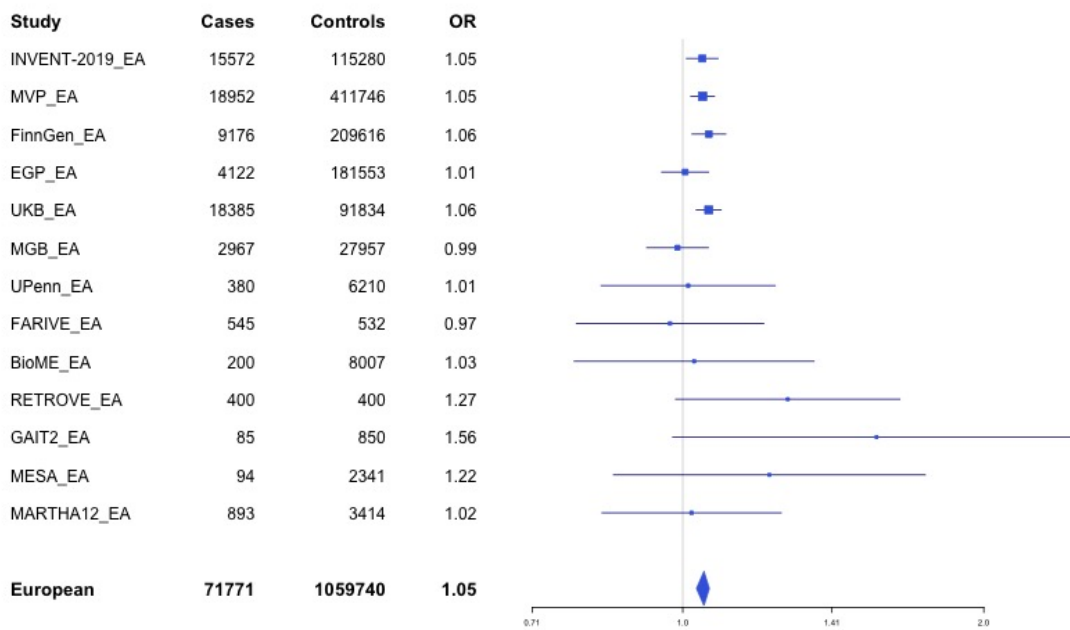

Supplementary Figure 3.5 – rs1775815 (chr1:118148830) in locus 5 (TENT5C)

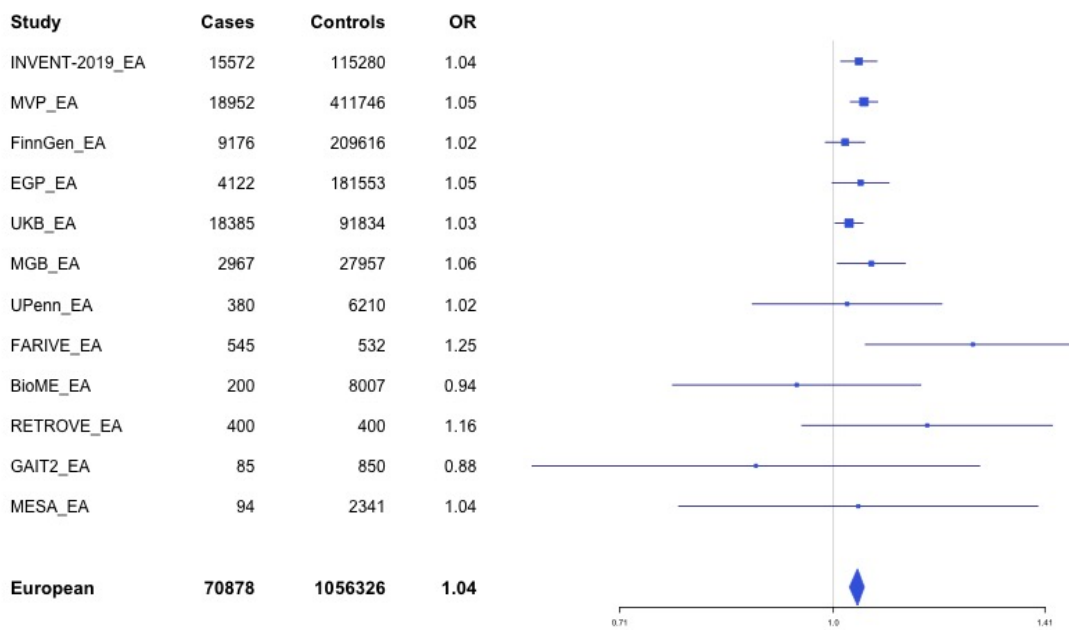

Supplementary Figure 3.6 – rs1267881263 (chr1:150496127) in locus 6 (FALEC;ADAMTSL4)

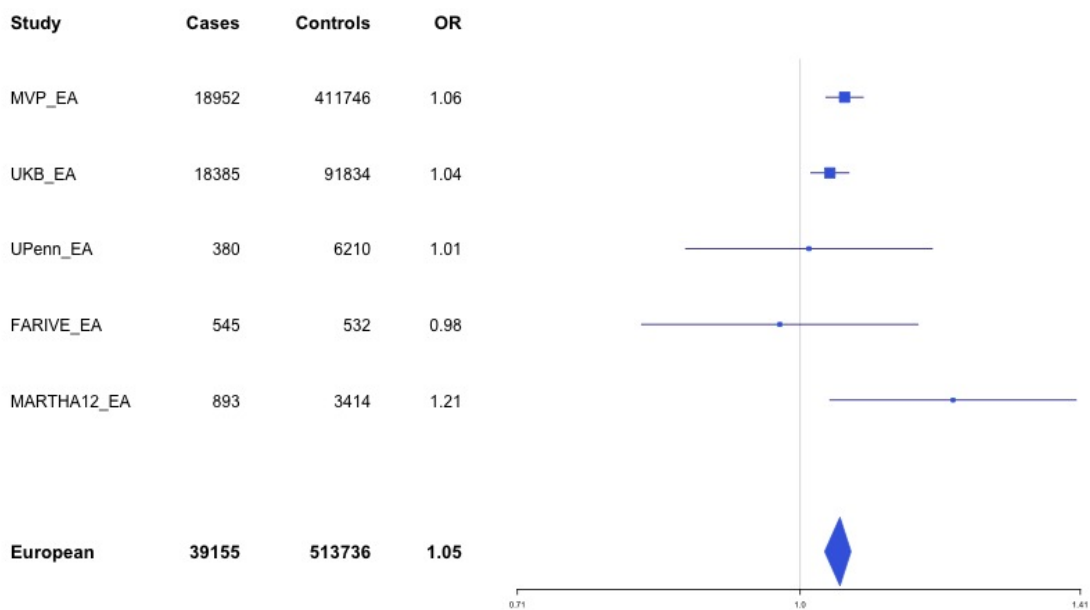

Supplementary Figure 3.7 – rs76798800 (chr1:154994978) in locus 7 (DCST2)

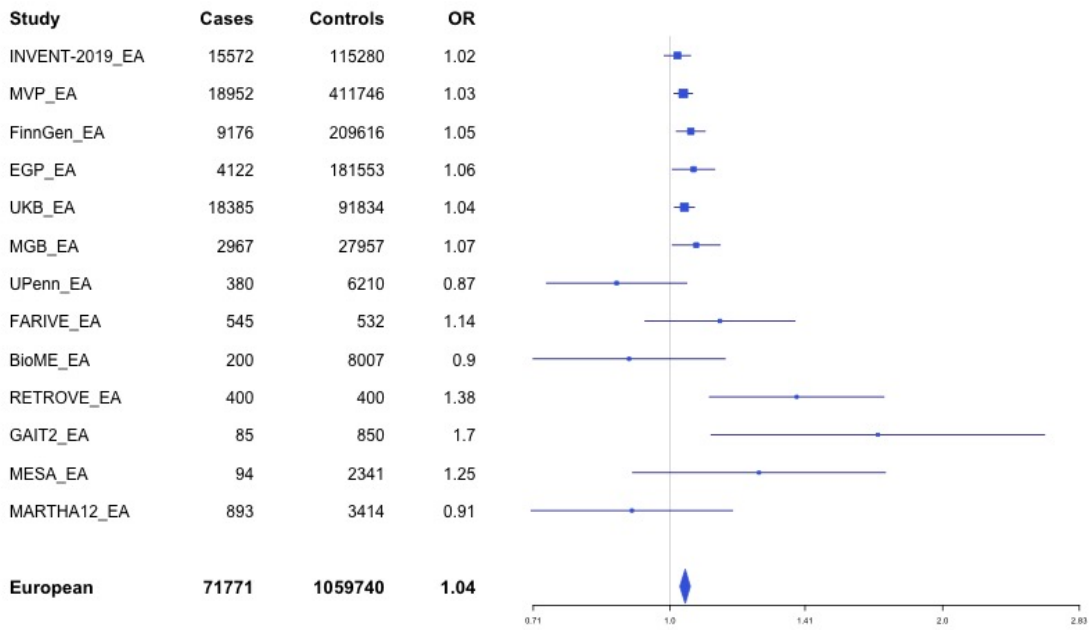

Supplementary Figure 3.8 – rs3557 (chr1:161188893) in locus 8 (FCER1G)

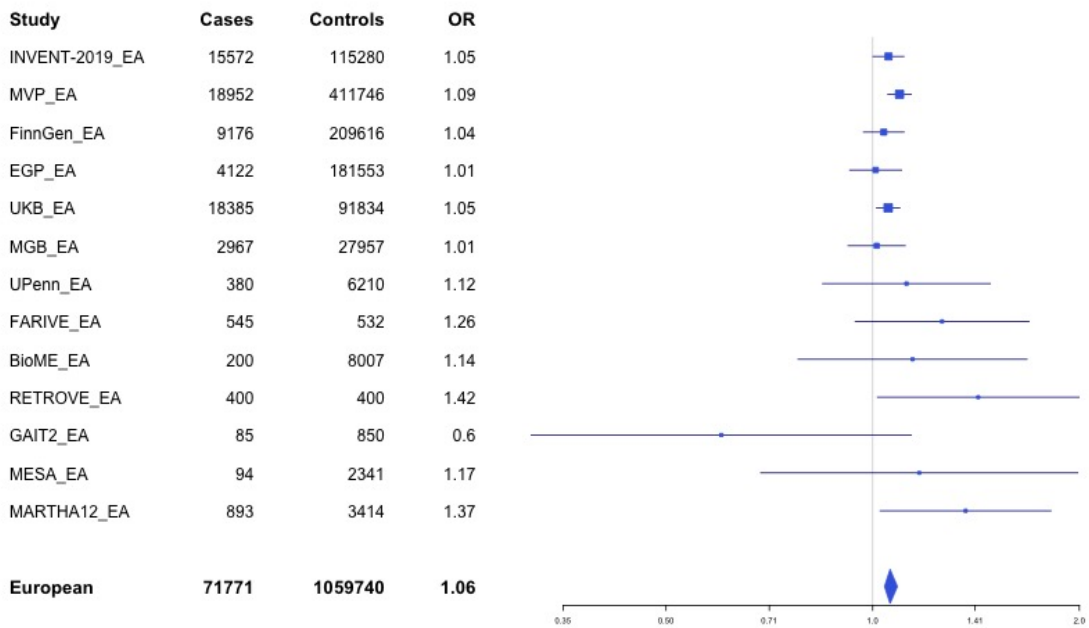

Supplementary Figure 3.9 – rs6025 (chr1:169519049) in locus 9 (F5)

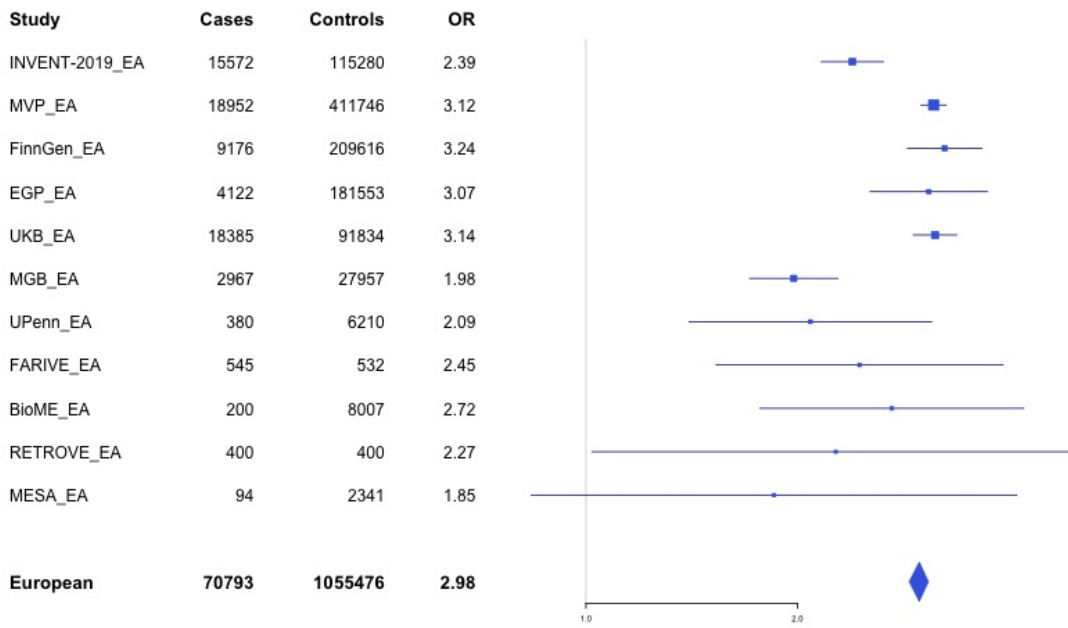

Supplementary Figure 3.10 – rs4540639 (chr1:192104320) in locus 11 (LINC01680;RGS18)

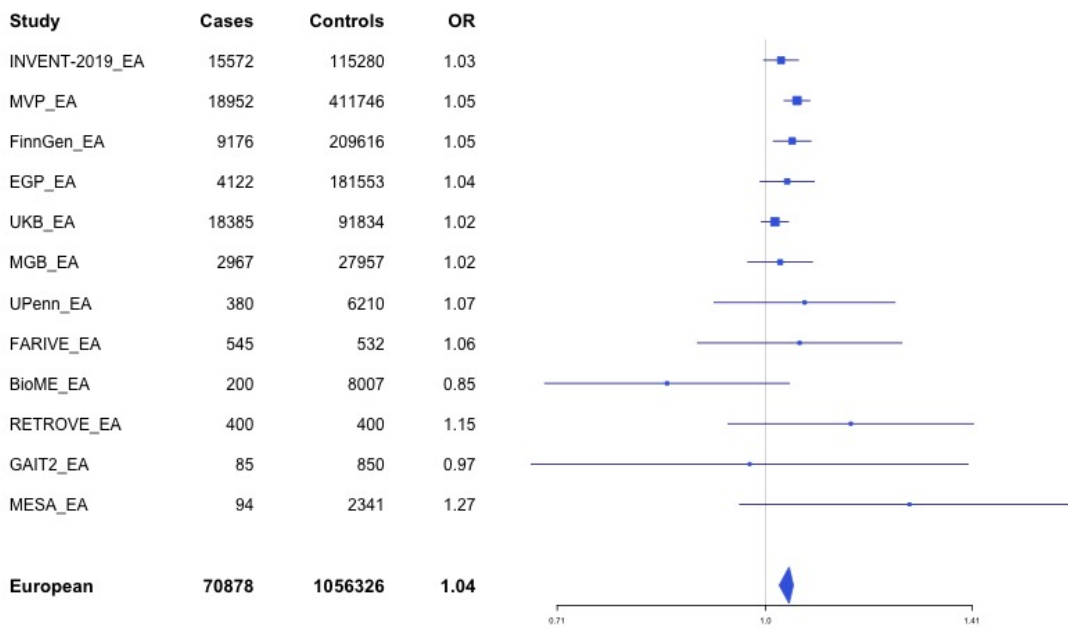

Supplementary Figure 3.11 – rs2842700 (chr1:207282149) in locus 13 (C4BPA)

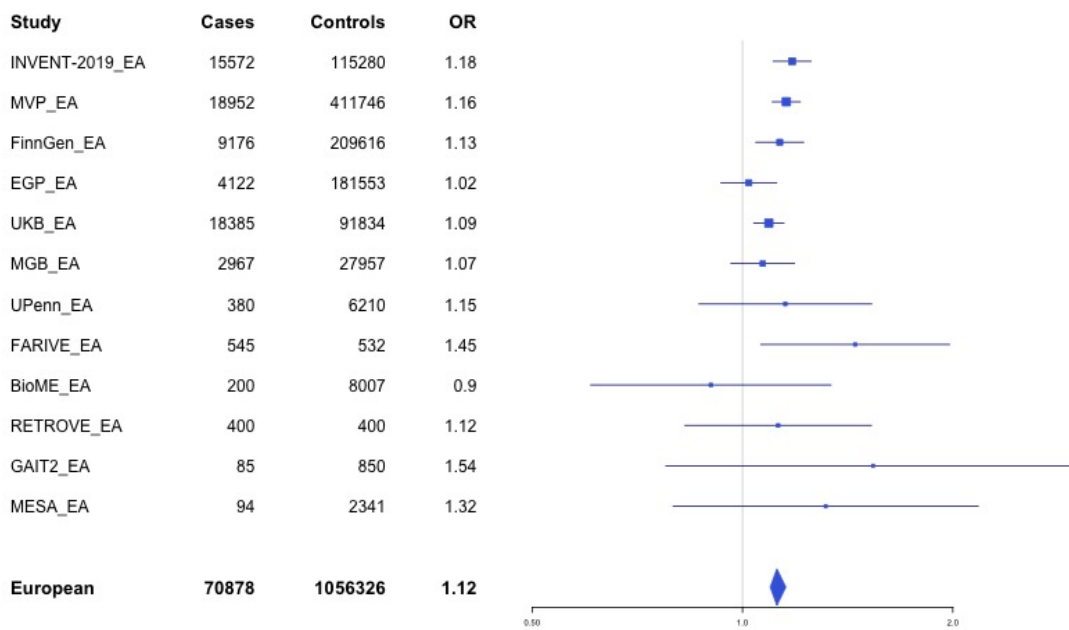

Supplementary Figure 3.12 – rs3811444 (chr1:248039451) in locus 14 (TRIM58)

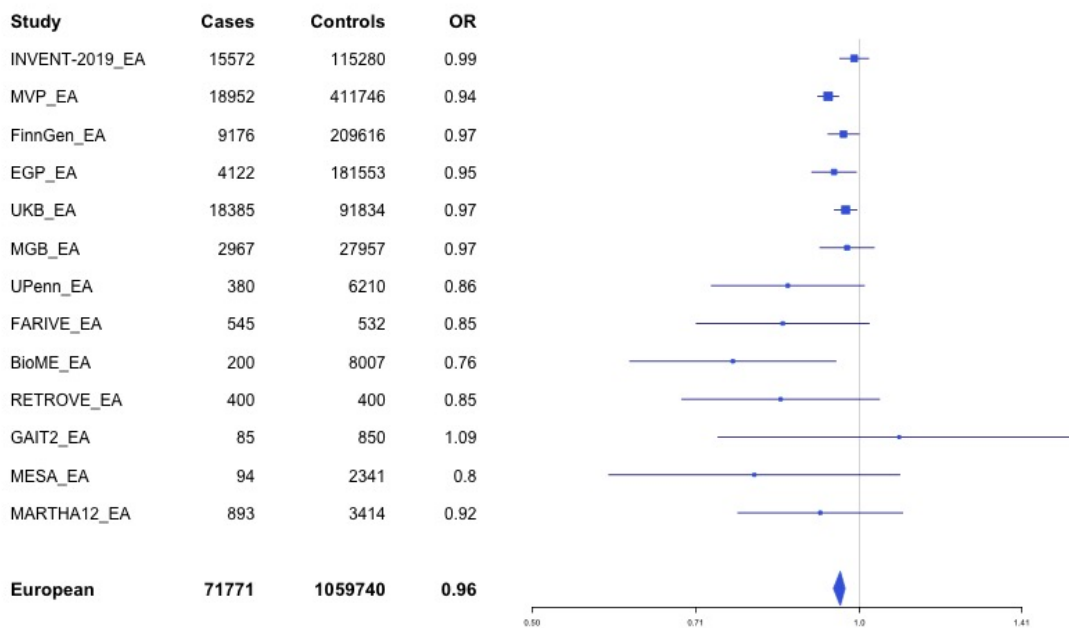



Supplementary Figure 3.13 – rs1867312 (chr2:68619981) in locus 17 (PLEK)

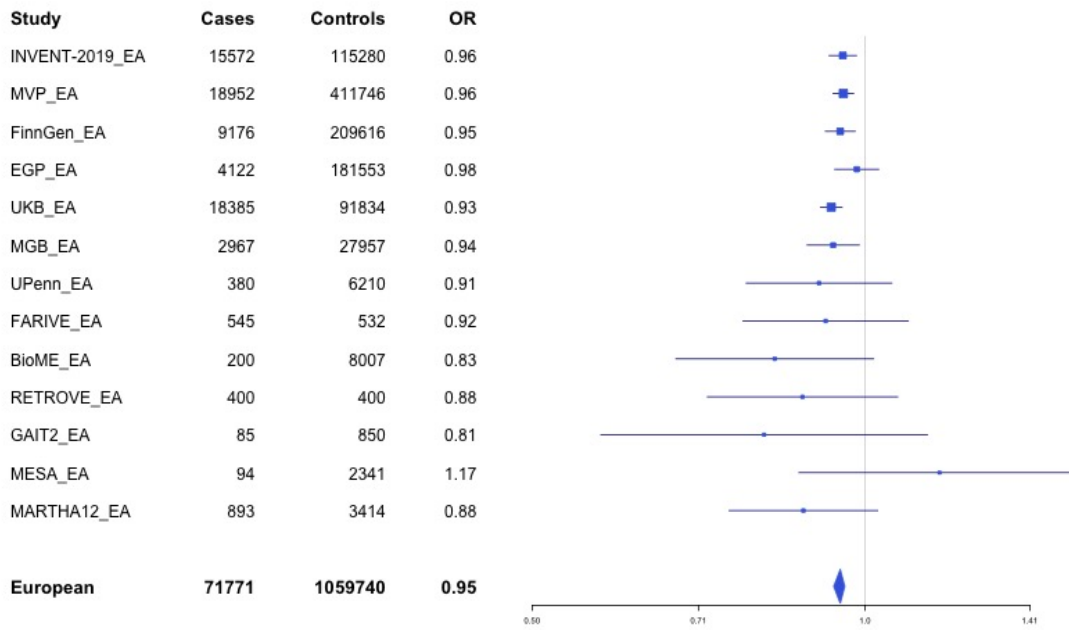

Supplementary Figure 3.14 – rs1158867 (chr2:128177377) in locus 18 (PROC)

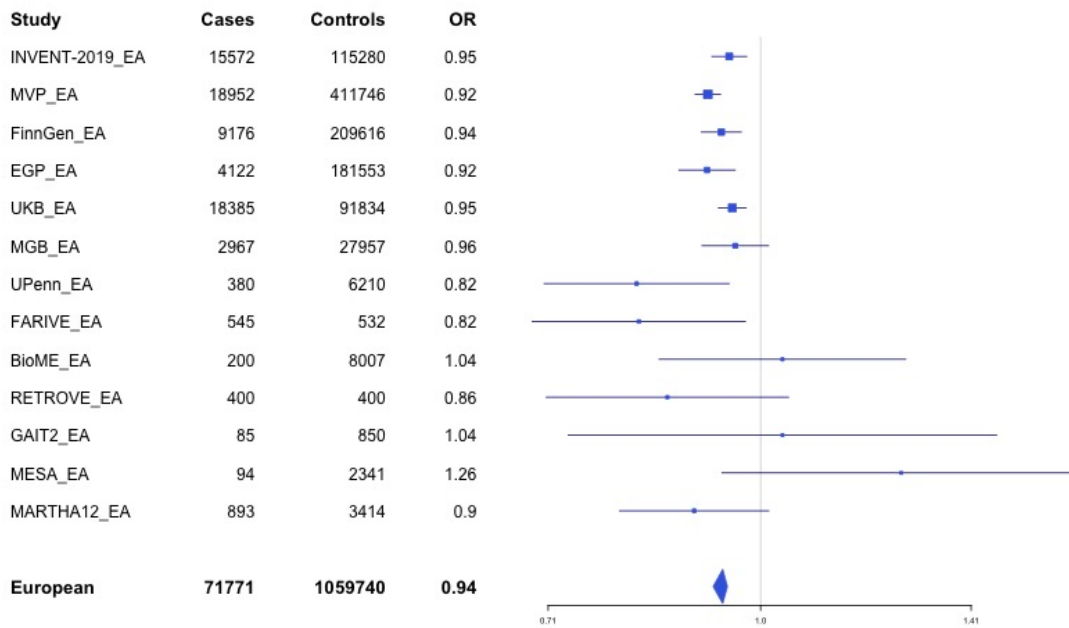

Supplementary Figure 3.15 – rs1912846 (chr2:188325444) in locus 19 (CALCRL;TFPI)

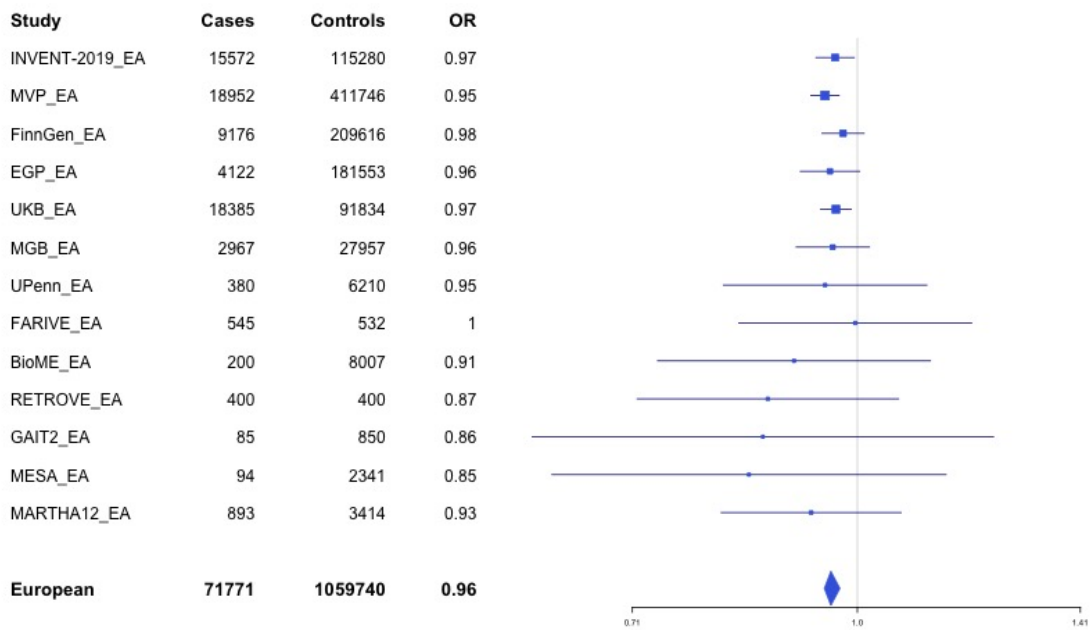

Supplementary Figure 3.16 – rs78872368 (chr2:198545250) in locus 20 (RFTN2;MARS2)

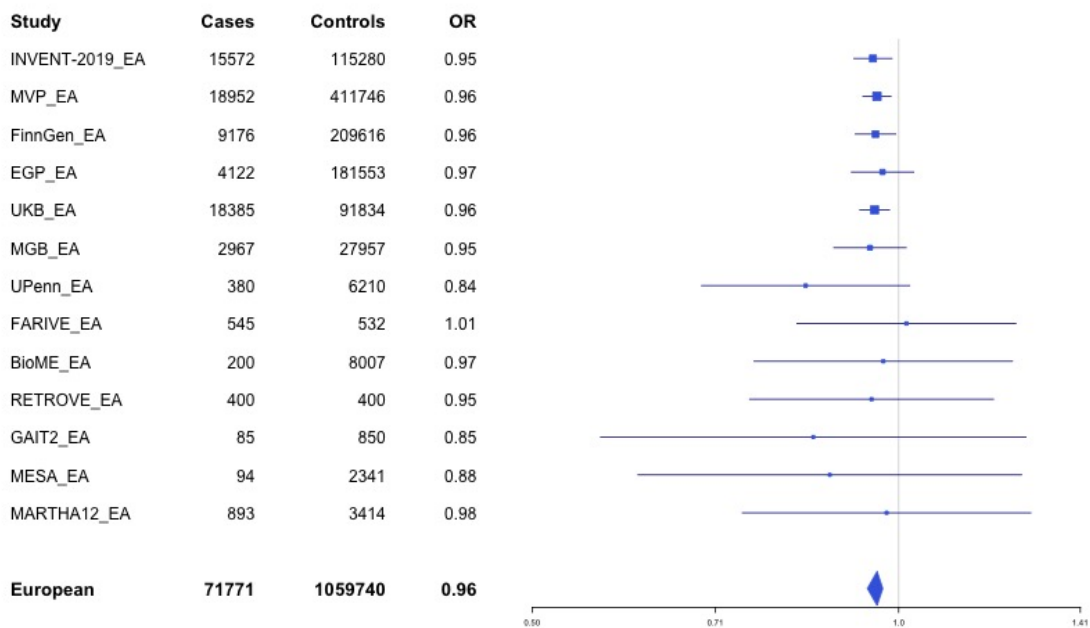

Supplementary Figure 3.17 – rs1047891 (chr2:211540507) in locus 21 (CPS1)

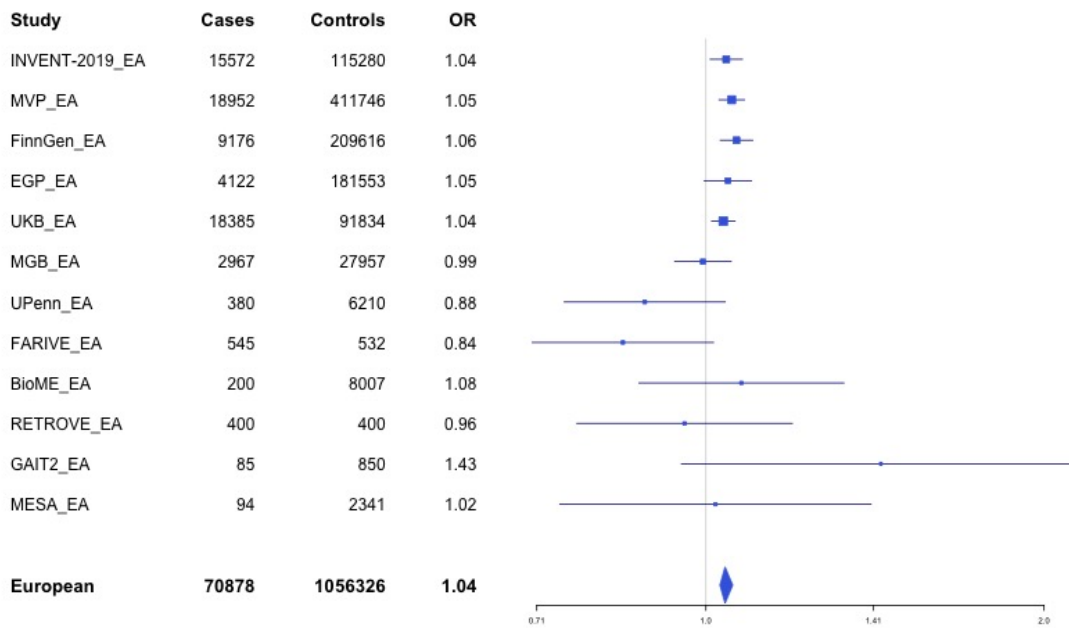

Supplementary Figure 3.18 – rs13412535 (chr2:224874874) in locus 22 (SERPINE2)

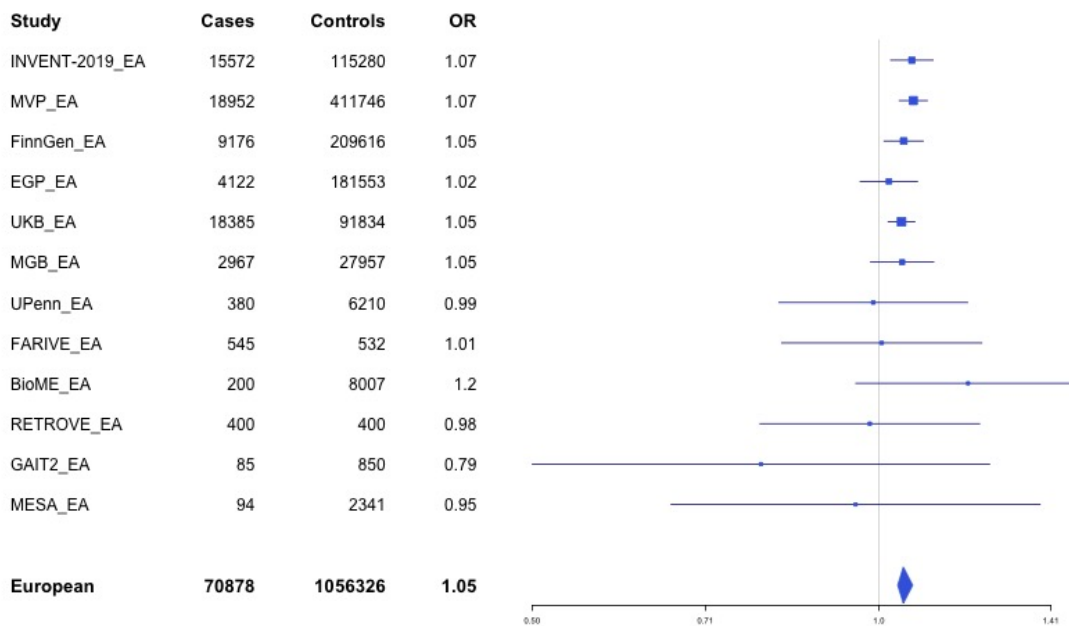

Supplementary Figure 3.19 – rs13084580 (chr3:39188182) in locus 24 (CSRNP1)

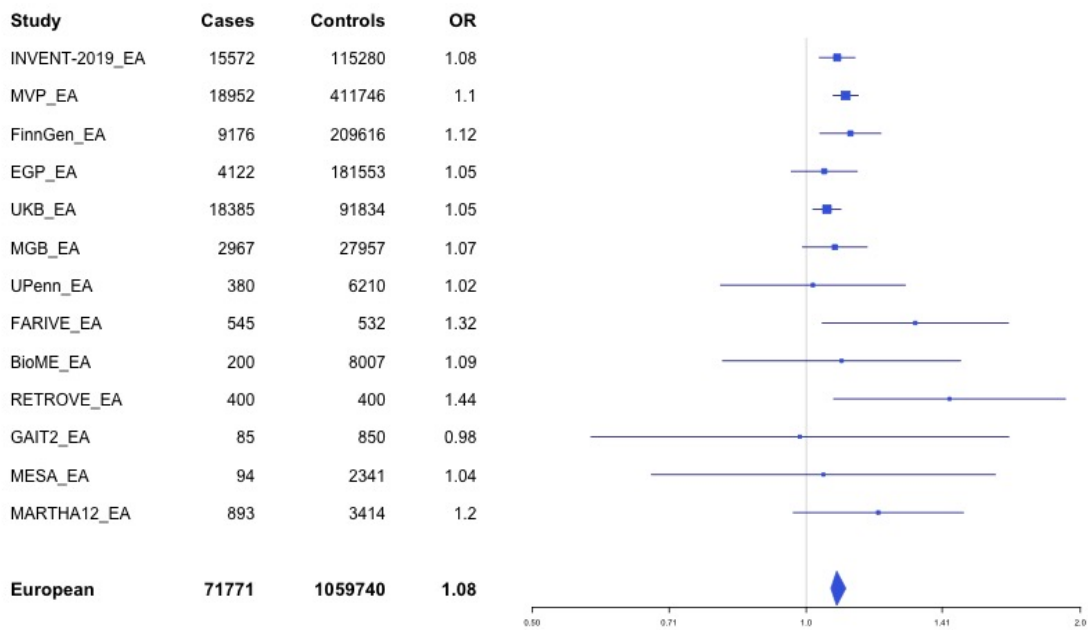

Supplementary Figure 3.20 – rs11130326 (chr3:52771920) in locus 25 (NEK4)

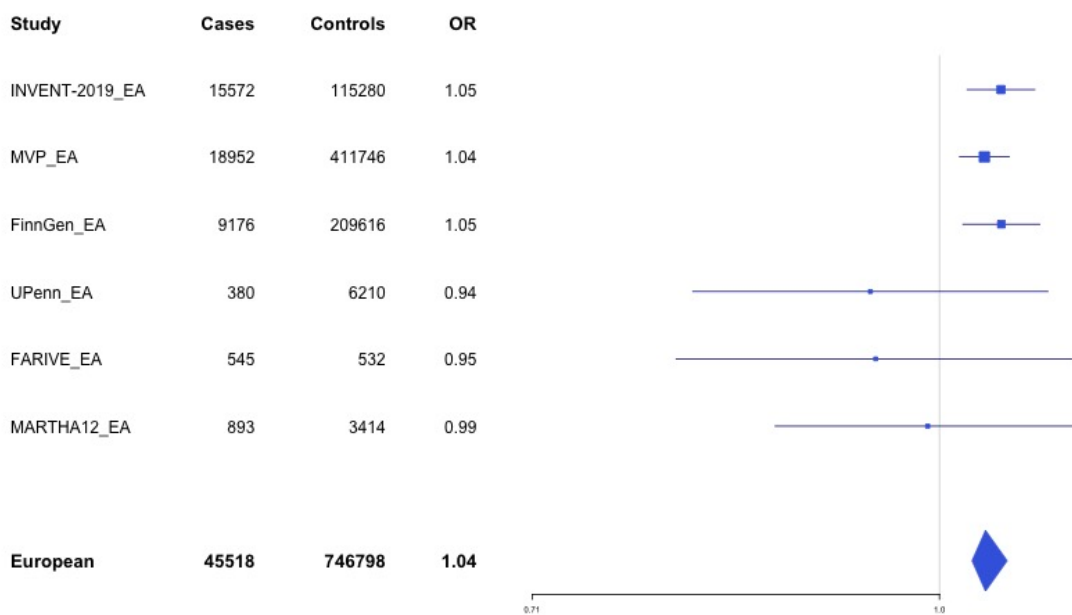

Supplementary Figure 3.21 – rs9866664 (chr3:90437988) in locus 26 (EPHA3;NONE)

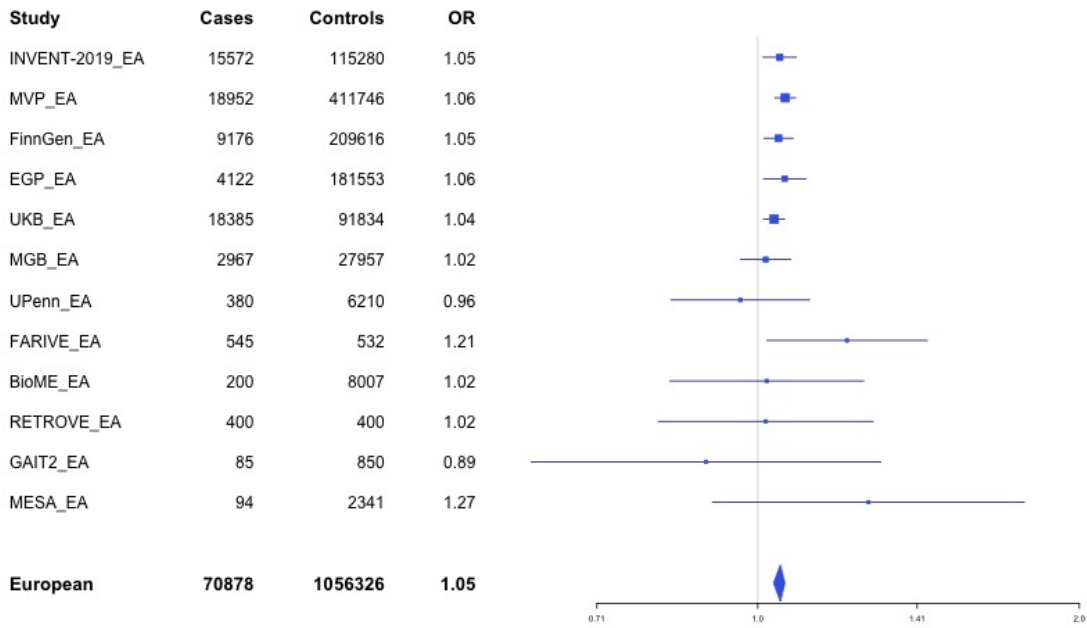

Supplementary Figure 3.22 – rs28479320 (chr3:93752529) in locus 27 (ARL13B)

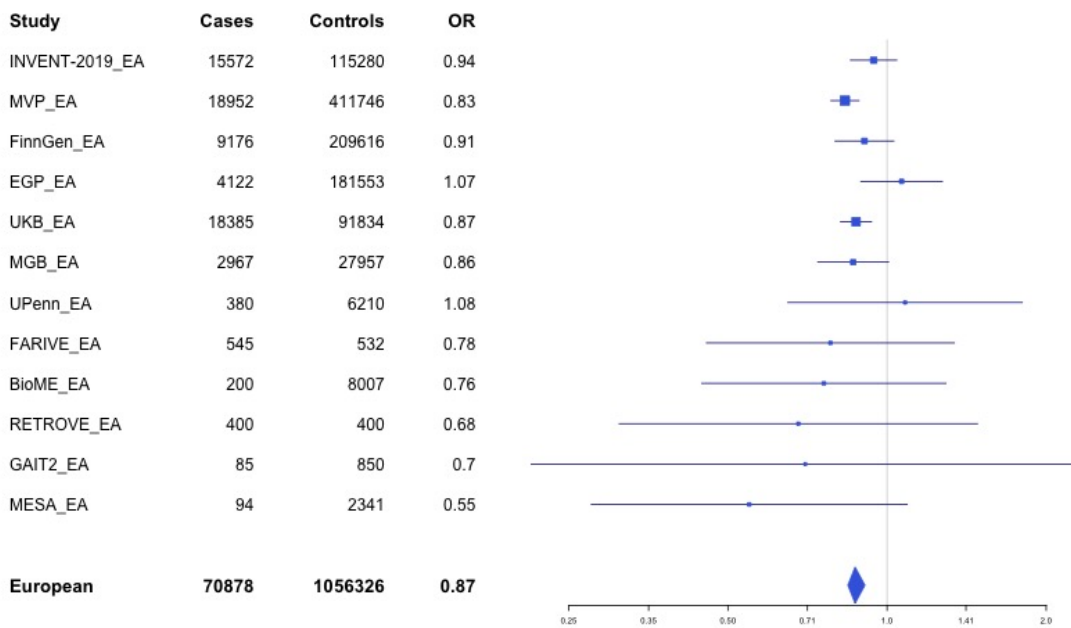

Supplementary Figure 3.23 – rs9854955 (chr3:156795525) in locus 30 (LEKR1 ;LINC00880)

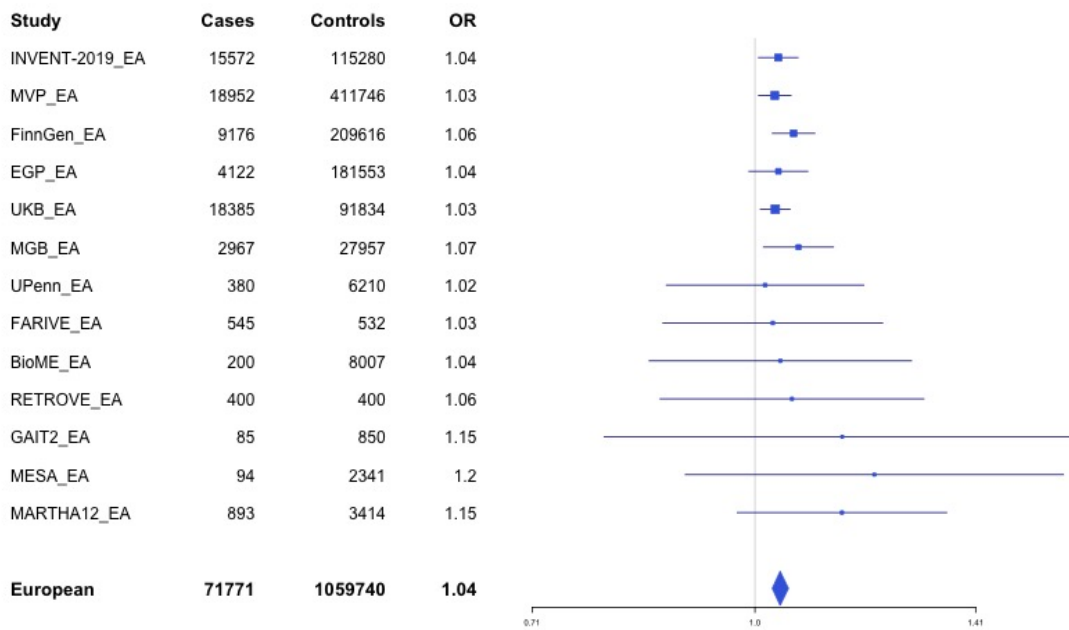

Supplementary Figure 3.24 – rs710446 (chr3:186459927) in locus 32 (KNG1)

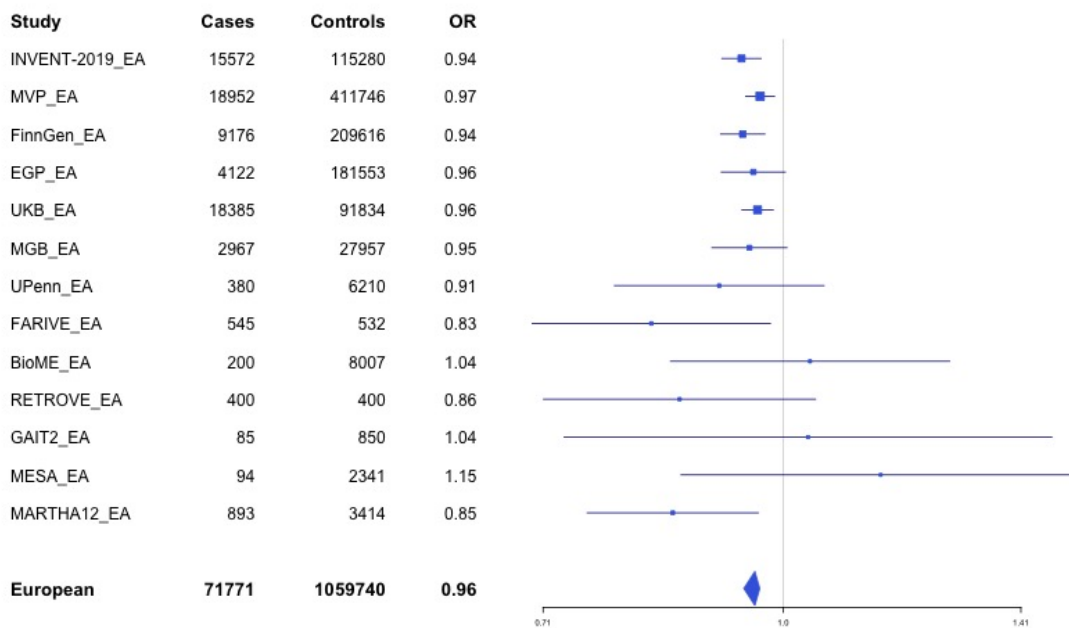

Supplementary Figure 3.25 – rs3796159 (chr3:194790434) in locus 33 (XXYLT1)

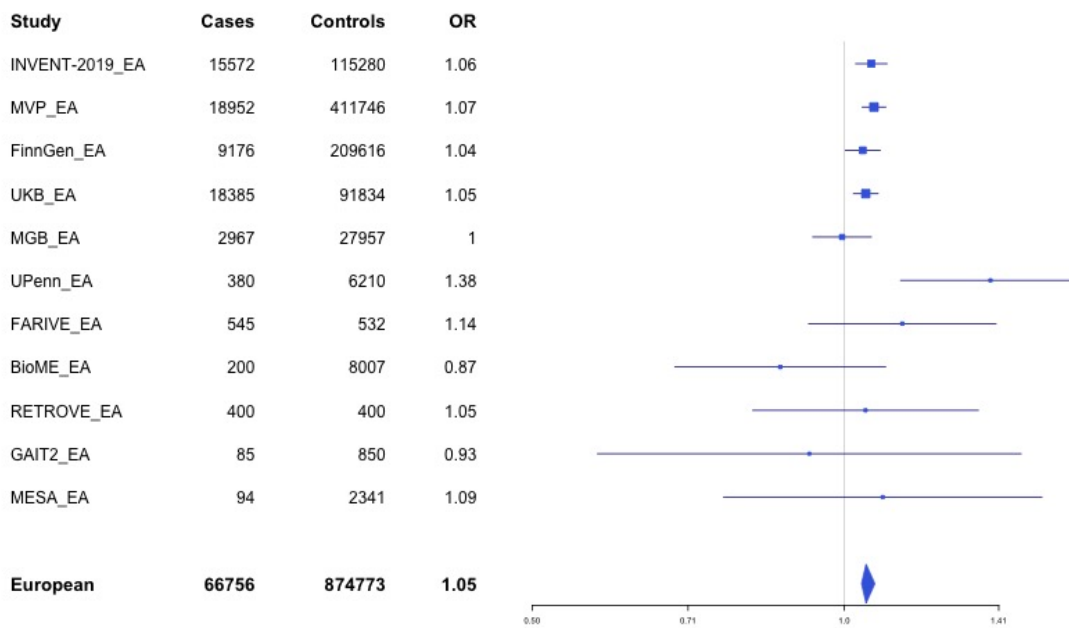

Supplementary Figure 3.26 – rs72976751 (chr4:86725959) in locus 37 (ARHGAP24)

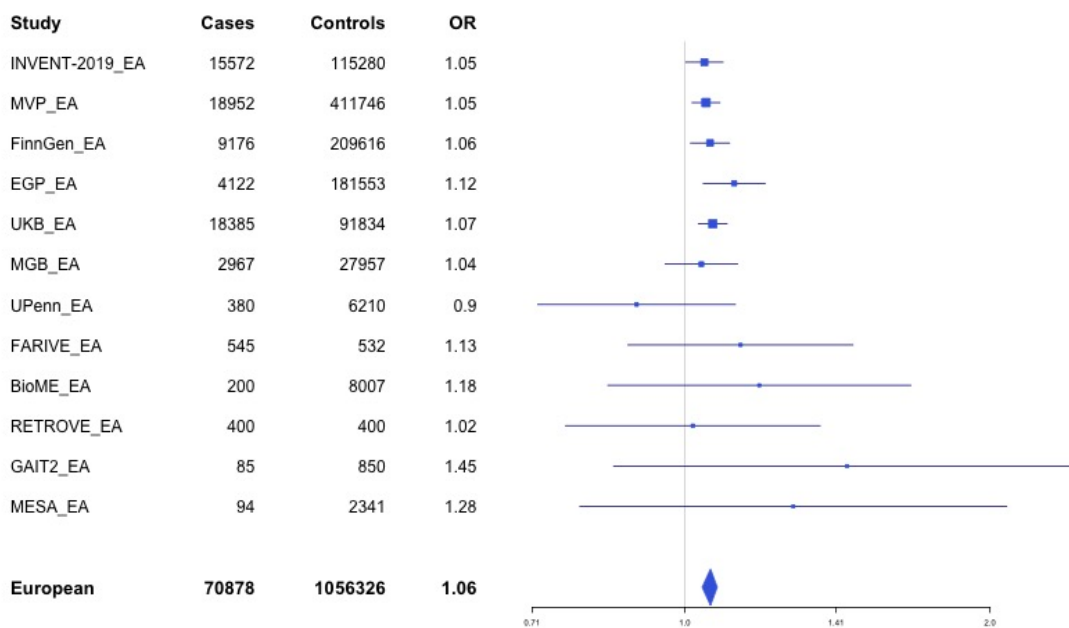

Supplementary Figure 3.27 – rs35225200 (chr4:103146888) in locus 38 (BANK1 ;SLC39A8)

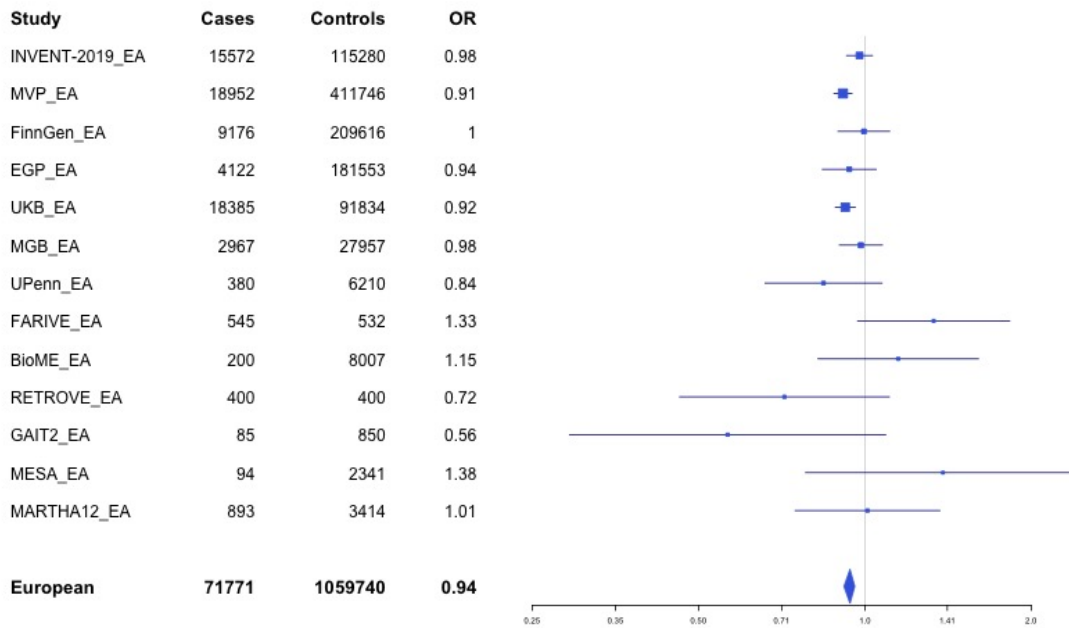

Supplementary Figure 3.28 – rs2066864 (chr4:155525695) in locus 39 (FGG)

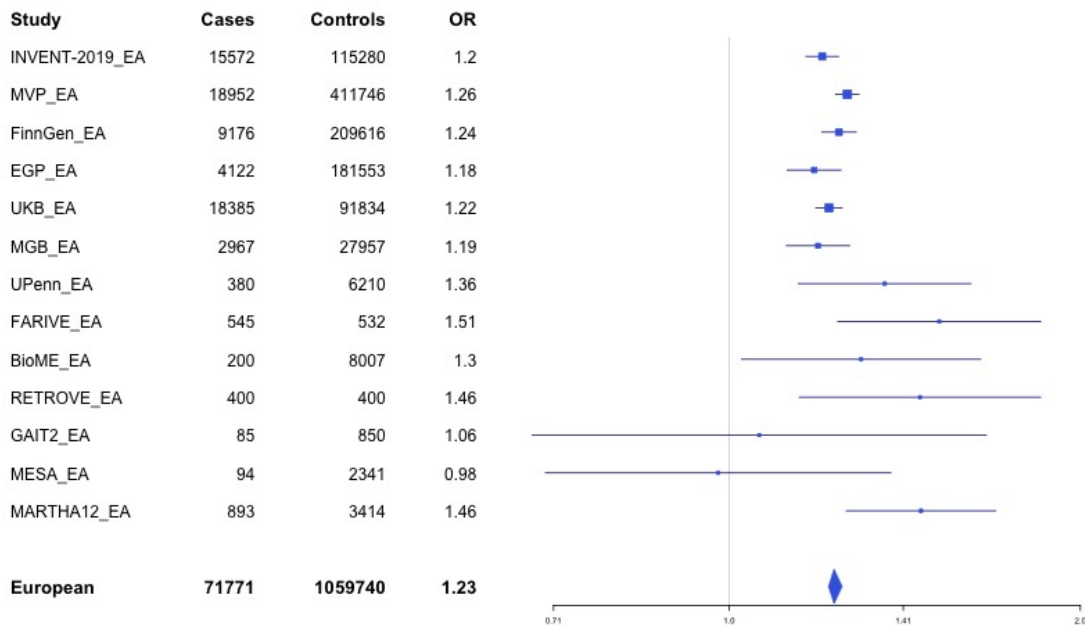



Supplementary Figure 3.29 – rs3756011 (chr4:187206249) in locus 40 (F11)

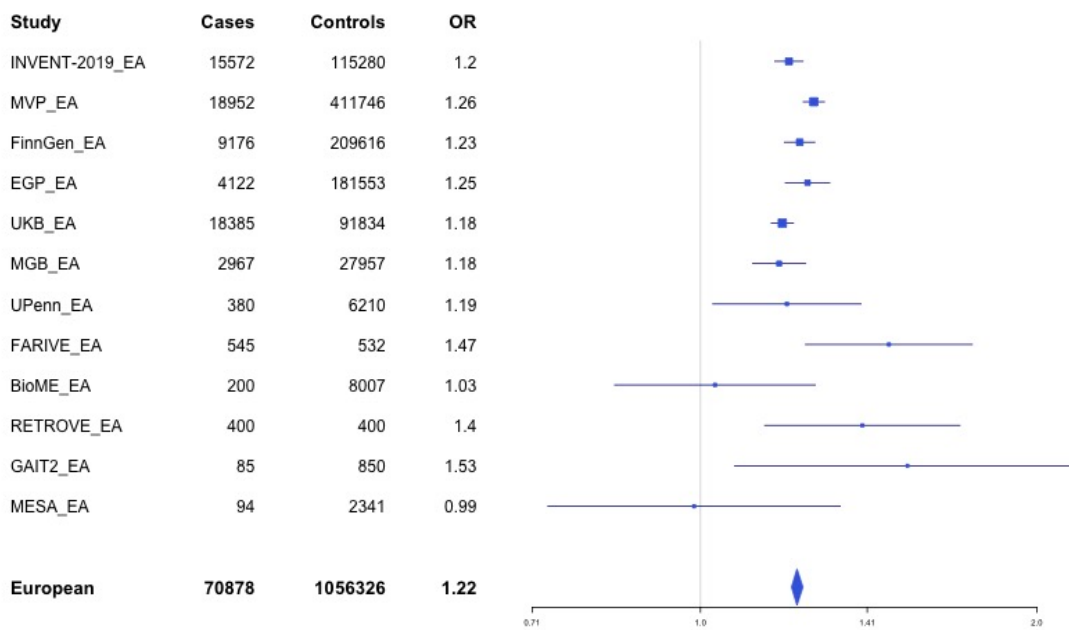

Supplementary Figure 3.30 – rs112367053 (chr5:28379046) in locus 41 (LINC02103;LSP1P3)

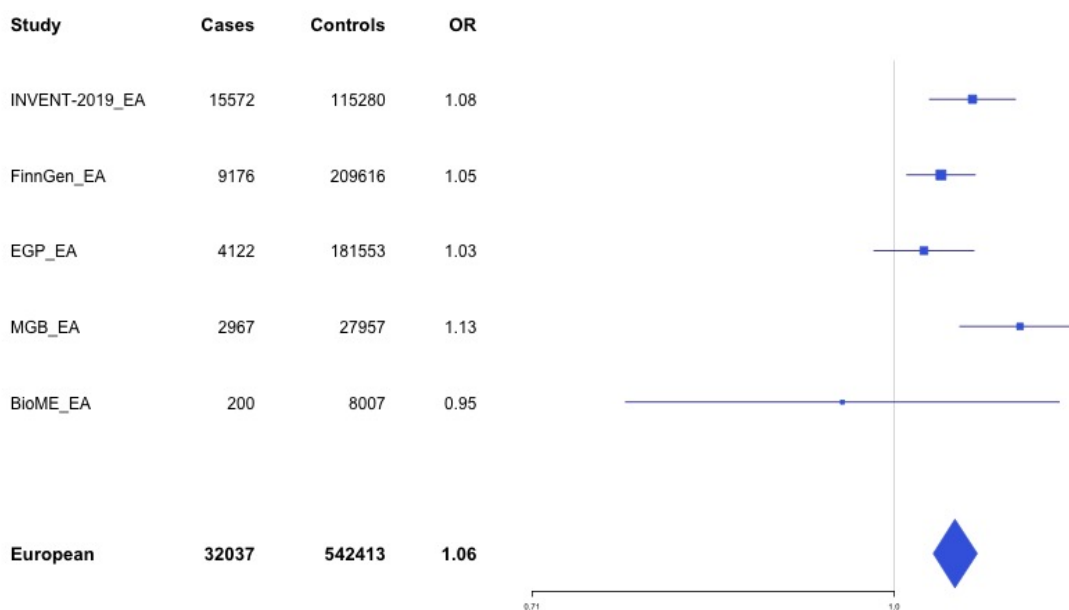

Supplementary Figure 3.31 – rs16867574 (chr5:38708554) in locus 42 (OSMR-AS1)

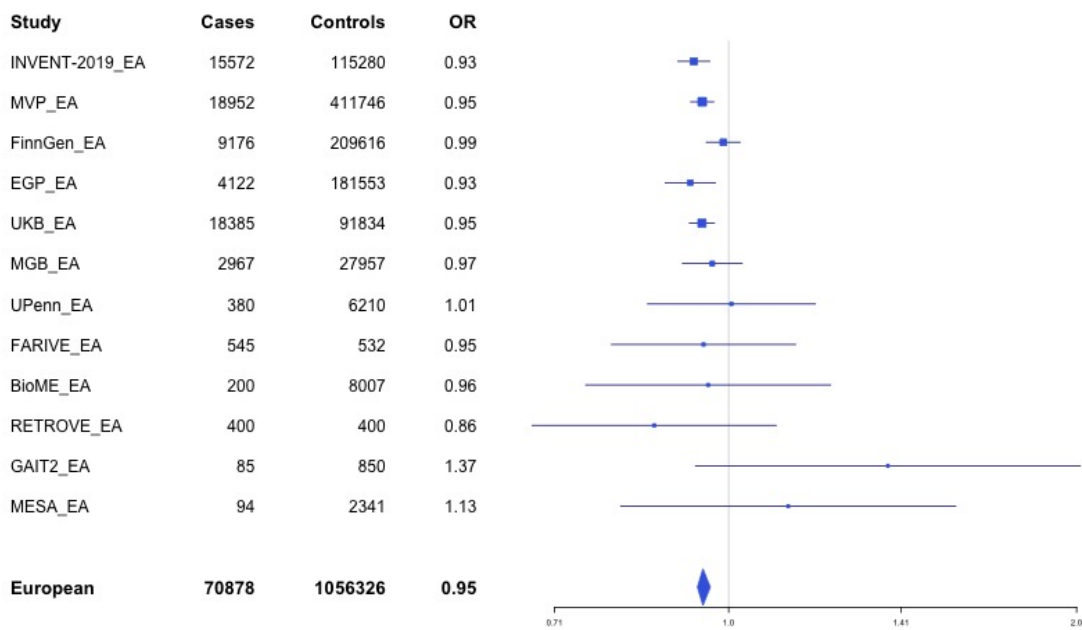

Supplementary Figure 3.32 – rs4235677 (chr5:72925091) in locus 43 (ARHGEF28)

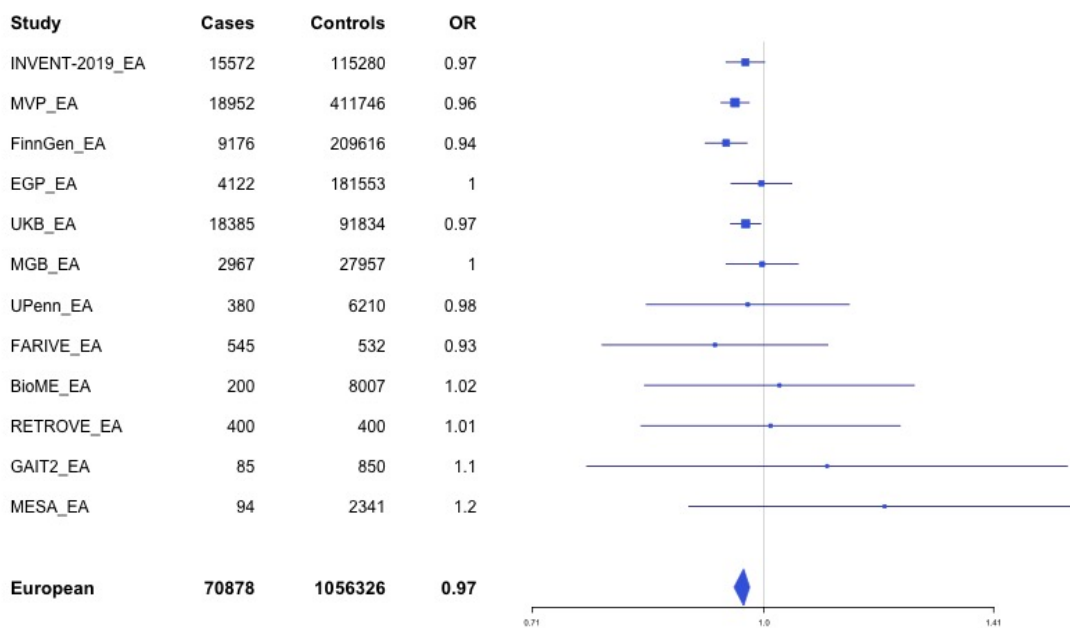

Supplementary Figure 3.33 – rs251339 (chr5:96235038) in locus 44 (ERAP2)

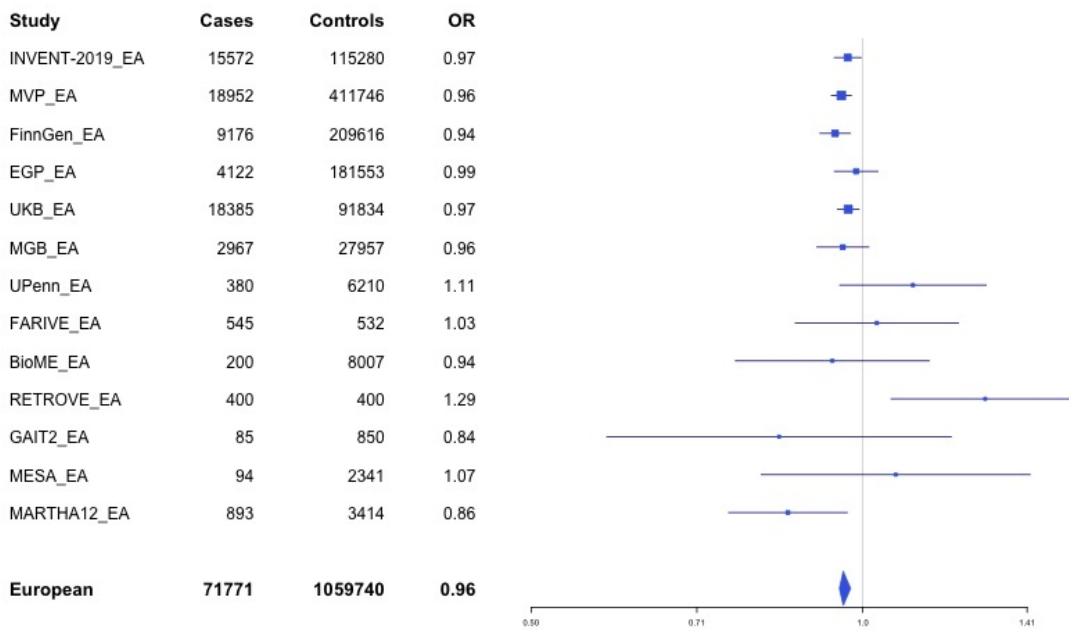

Supplementary Figure 3.34 – rs147133967 (chr5:132426851) in locus 45 (HSPA4)

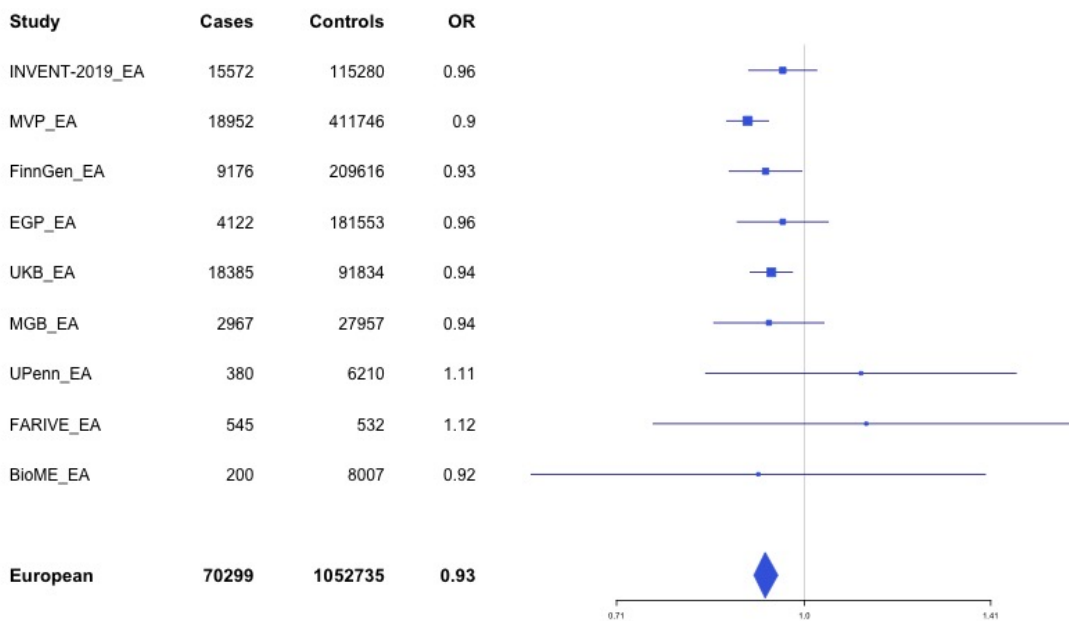

Supplementary Figure 3.35 – rs214059 (chr6:25536937) in locus 46 (CARMIL1)

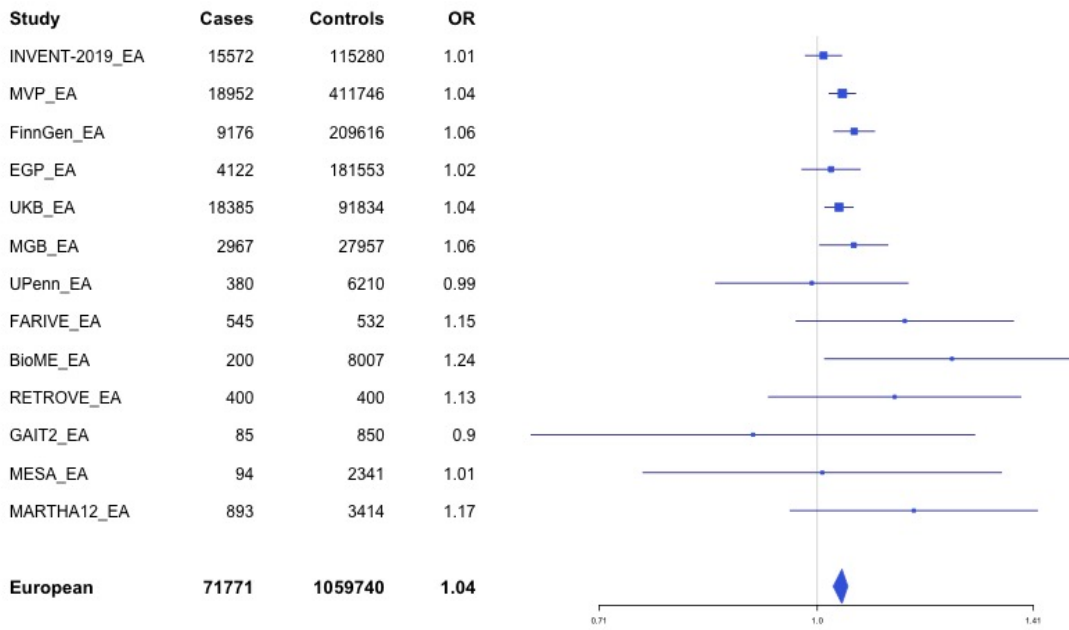

Supplementary Figure 3.36 – rs2394251 (chr6:29943688) in locus 47 (HCG9)

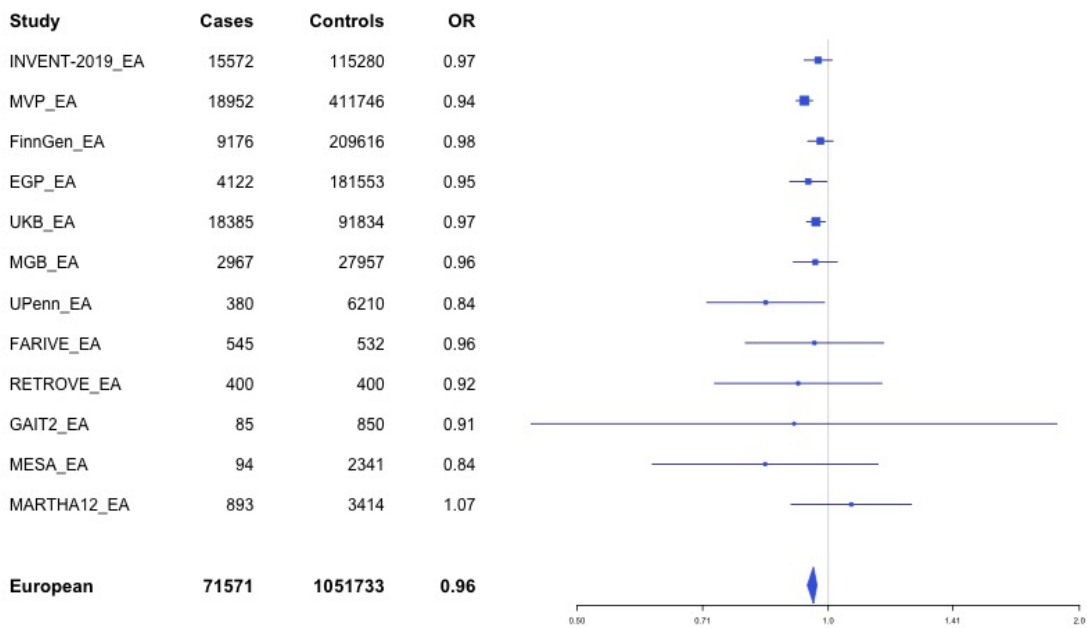

Supplementary Figure 3.37 – rs28383307 (chr6:32586755) in locus 48 (HLA-DRB1;HLA-DQA1)

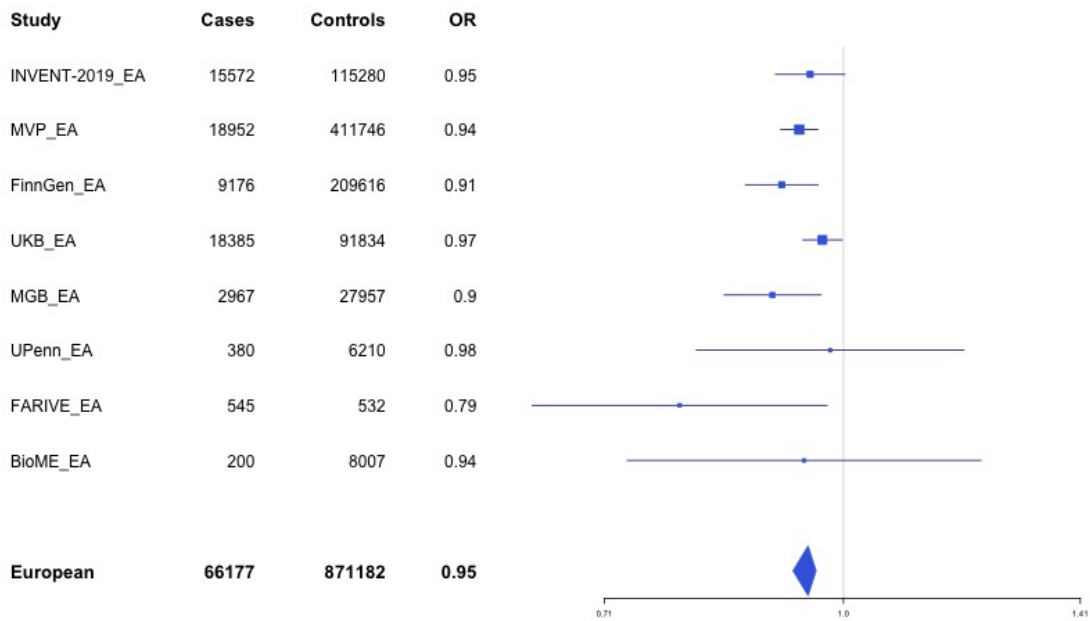

Supplementary Figure 3.38 – rs145294670 (chr6:34622561) in locus 49 (ILRUN)

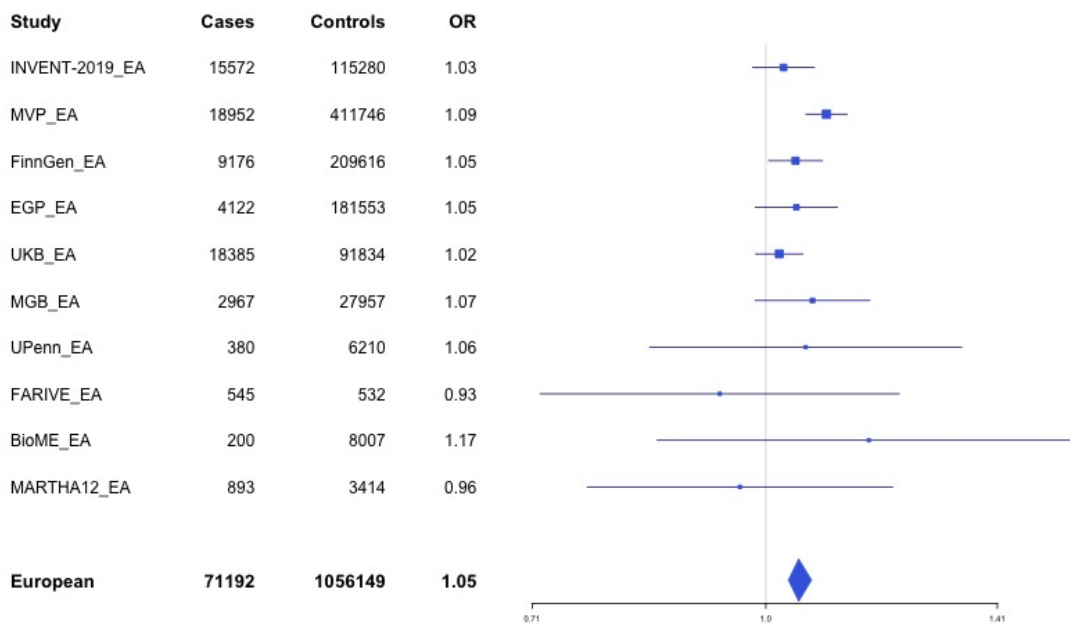

Supplementary Figure 3.39 – rs2754251 (chr6:88385949) in locus 51 (AKIRIN2)

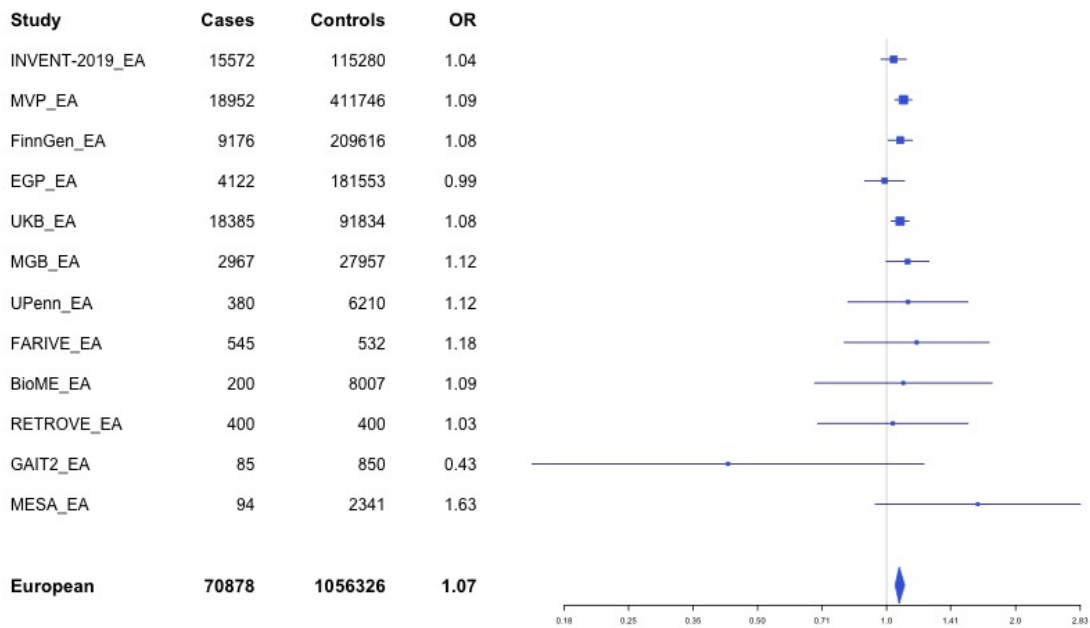

Supplementary Figure 3.40 – rs9390460 (chr6:147694334) in locus 52 (STXBP5)

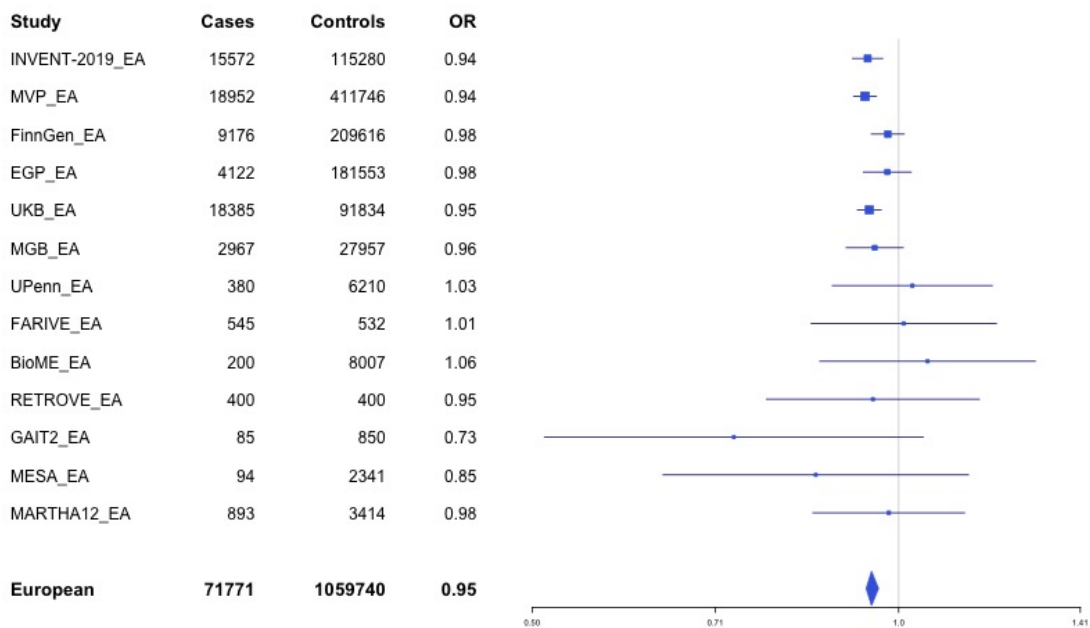

Supplementary Figure 3.41 – rs1513275 (chr7:28259233) in locus 53 (JAZF1-AS1)

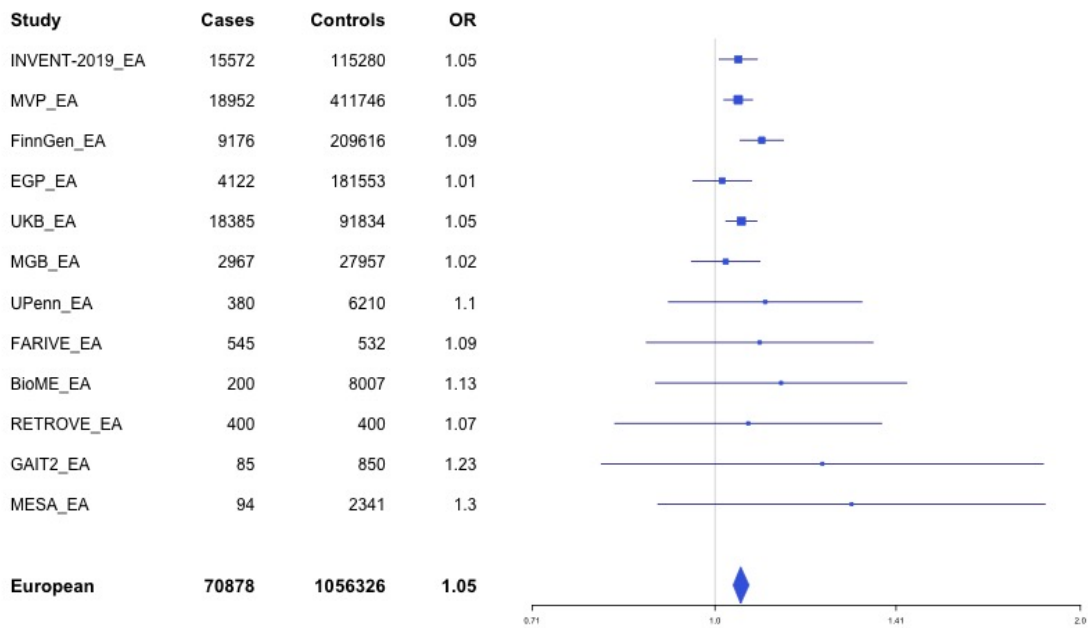

Supplementary Figure 3.42 – rs370720 (chr8:9168146) in locus 57 (LOC101929128 ;LOC157273)

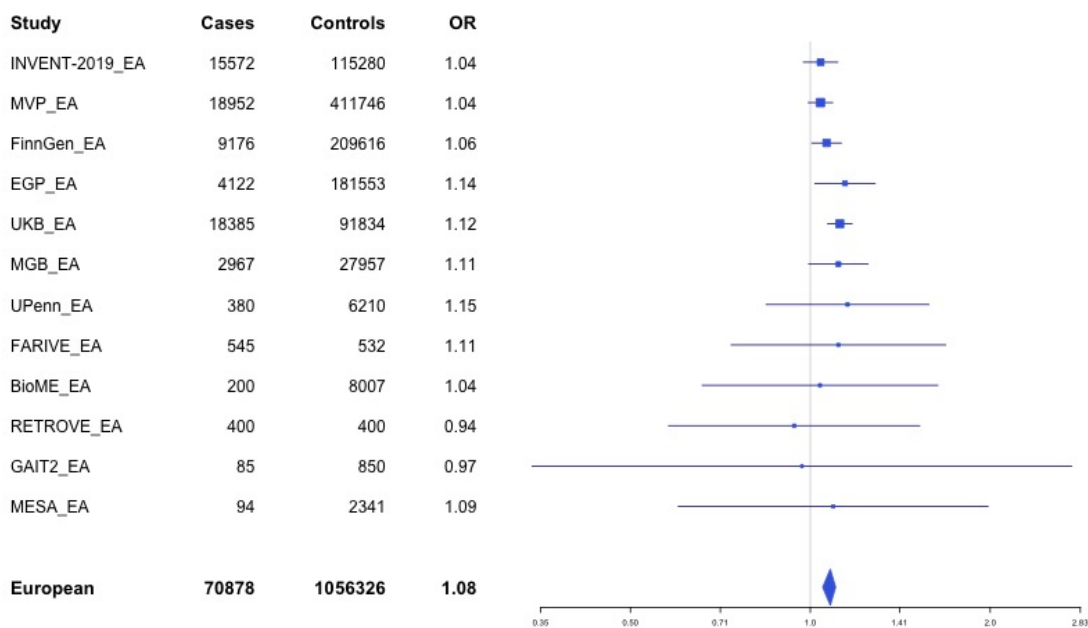

Supplementary Figure 3.43 – rs2726950 (chr8:27806764) in locus 60 (SCARA5)

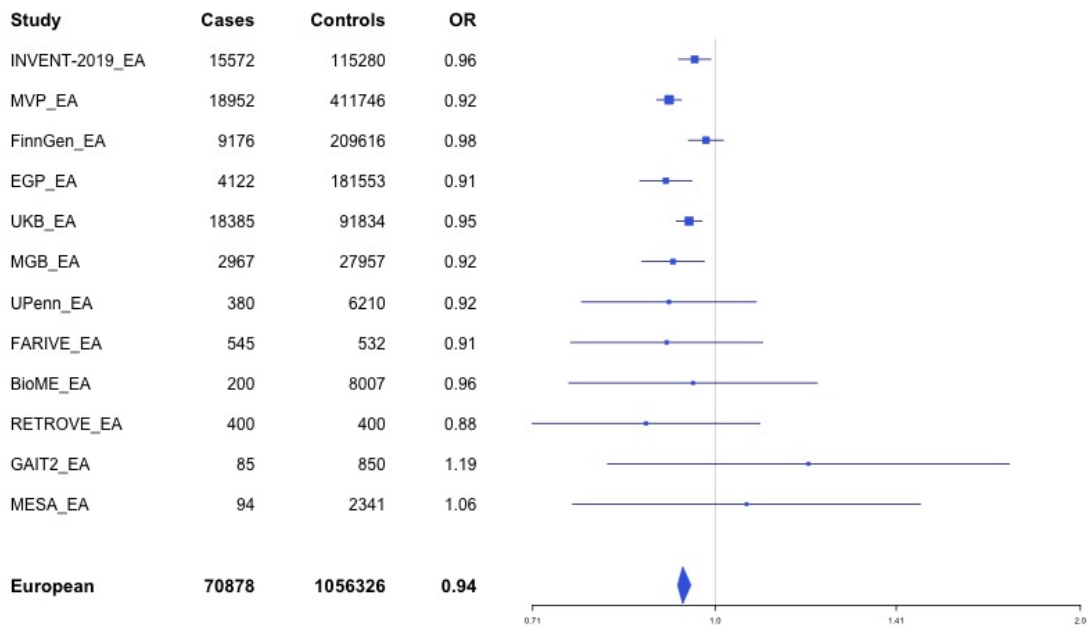

Supplementary Figure 3.44 – rs6993770 (chr8:106581528) in locus 62 (ZFPM2)

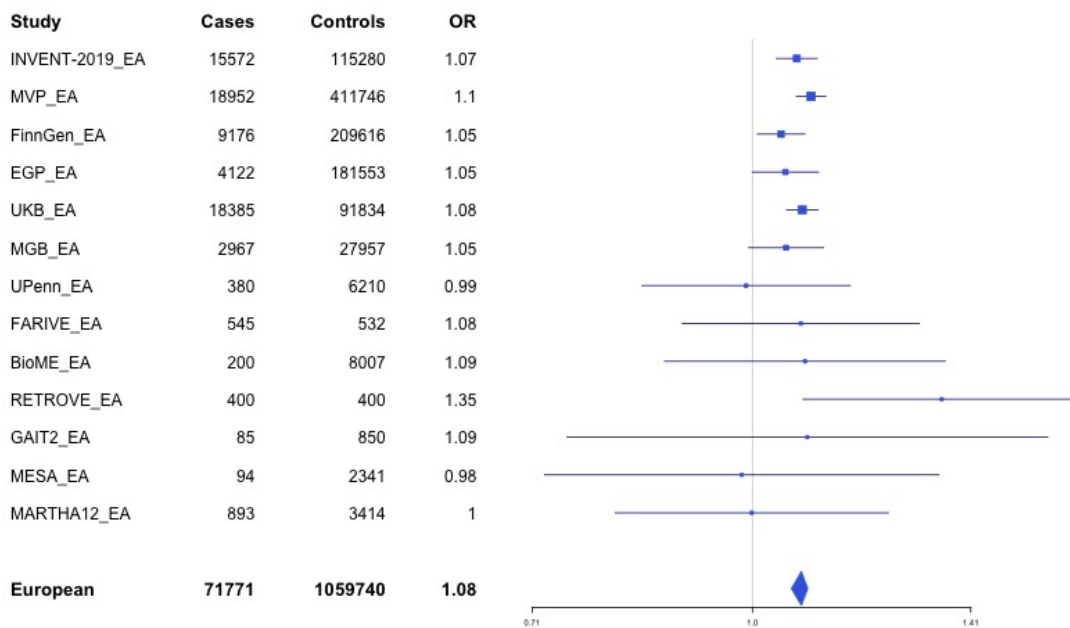



Supplementary Figure 3.45 – rs1491336705 (chr8:108295235) in locus 63 (ANGPT1)

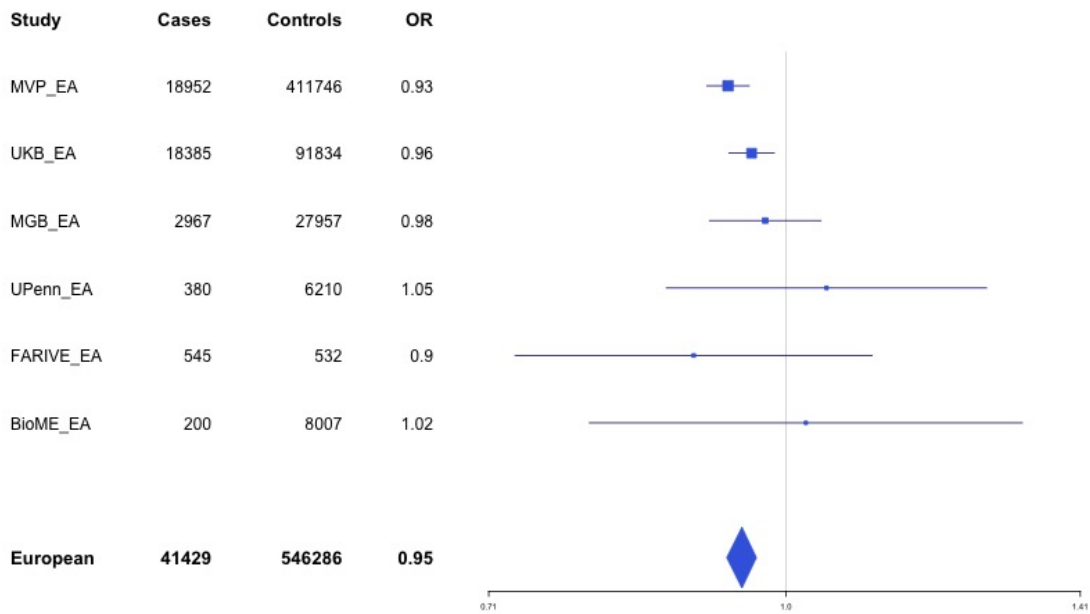

Supplementary Figure 3.46 – rs10820606 (chr9:99192919) in locus 65 (ZNF367;HABP4)

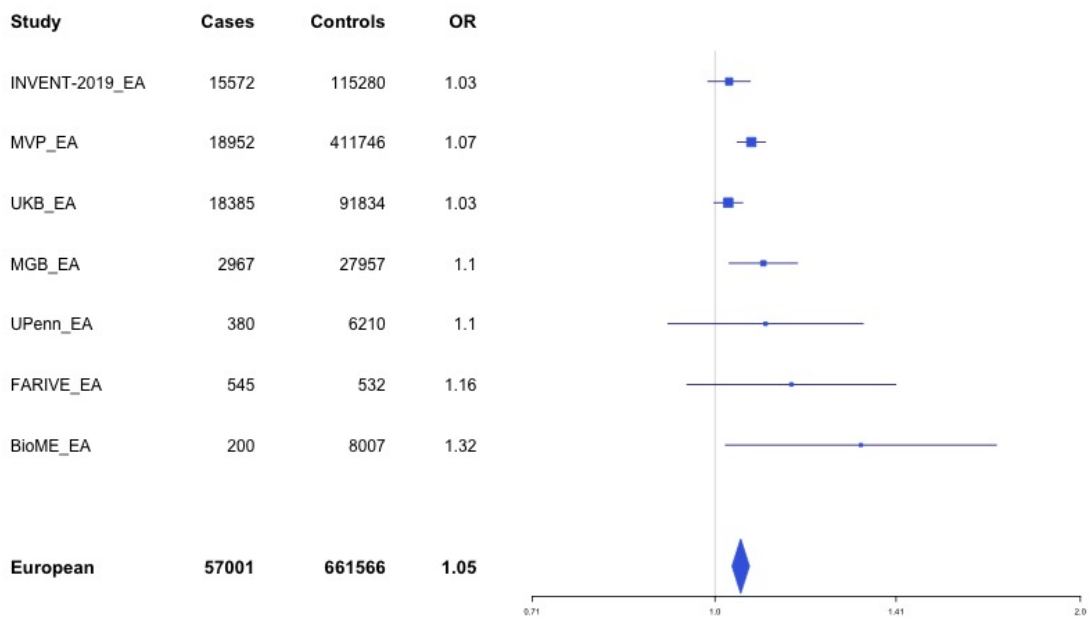

Supplementary Figure 3.47 – rs687289 (chr9:136137106) in locus 66 (ABO)

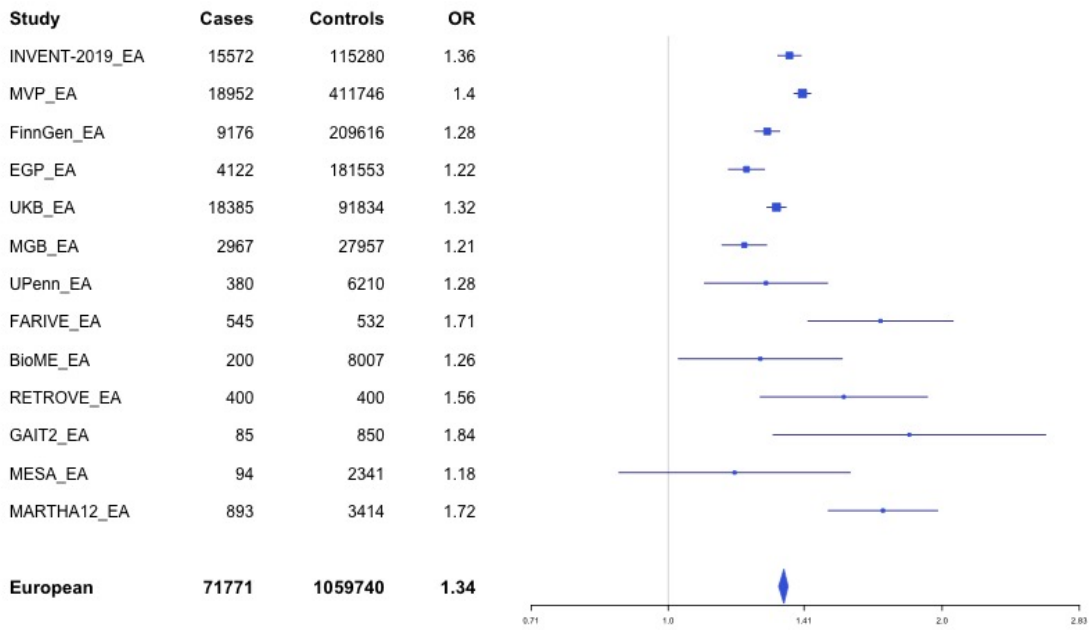

Supplementary Figure 3.48 – rs1243184 (chr10:21931937) in locus 68 (MLLT10)

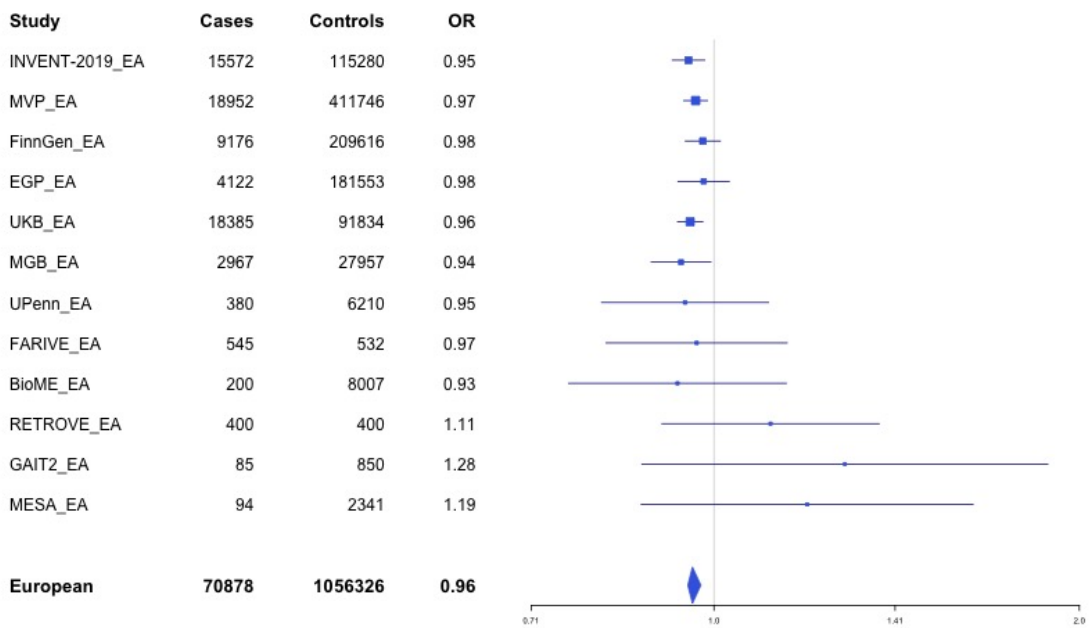

Supplementary Figure 3.49 – rs10763665 (chr10:28771491) in locus 70 (LINC02652)

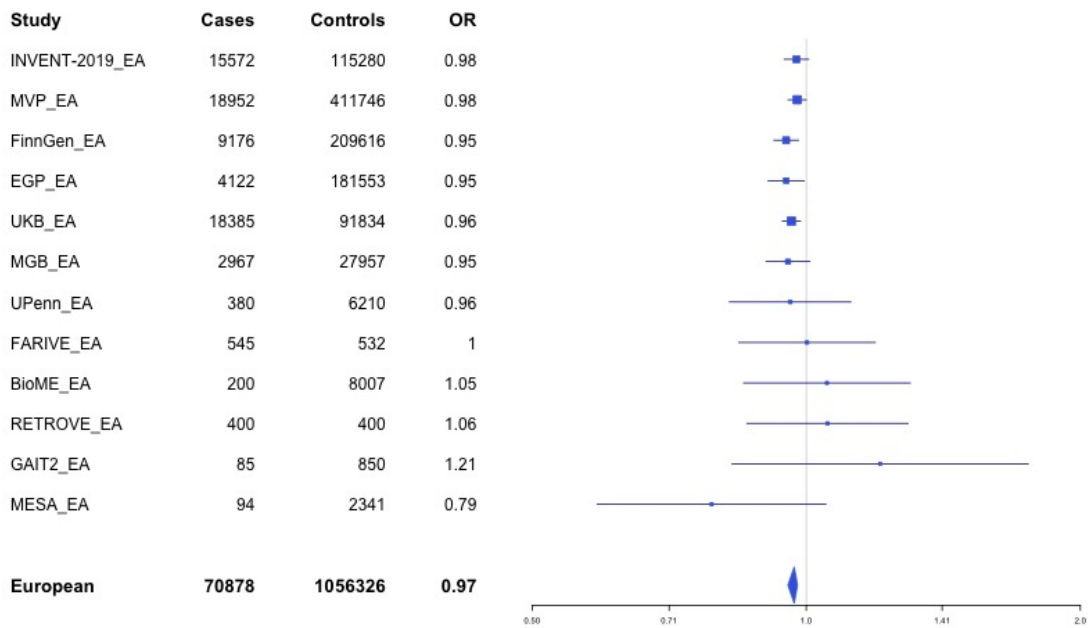

Supplementary Figure 3.50 – rs78707713 (chr10:71245276) in locus 72 (TSPAN15)

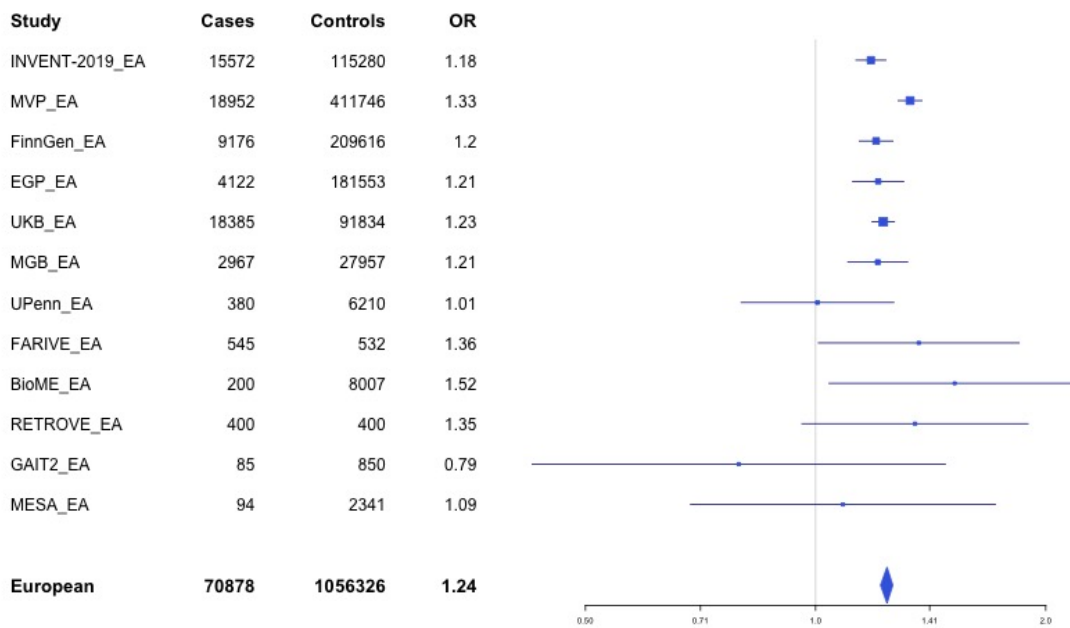

Supplementary Figure 3.51 – rs57866767 (chr10:96023077) in locus 74 (PLCE1)

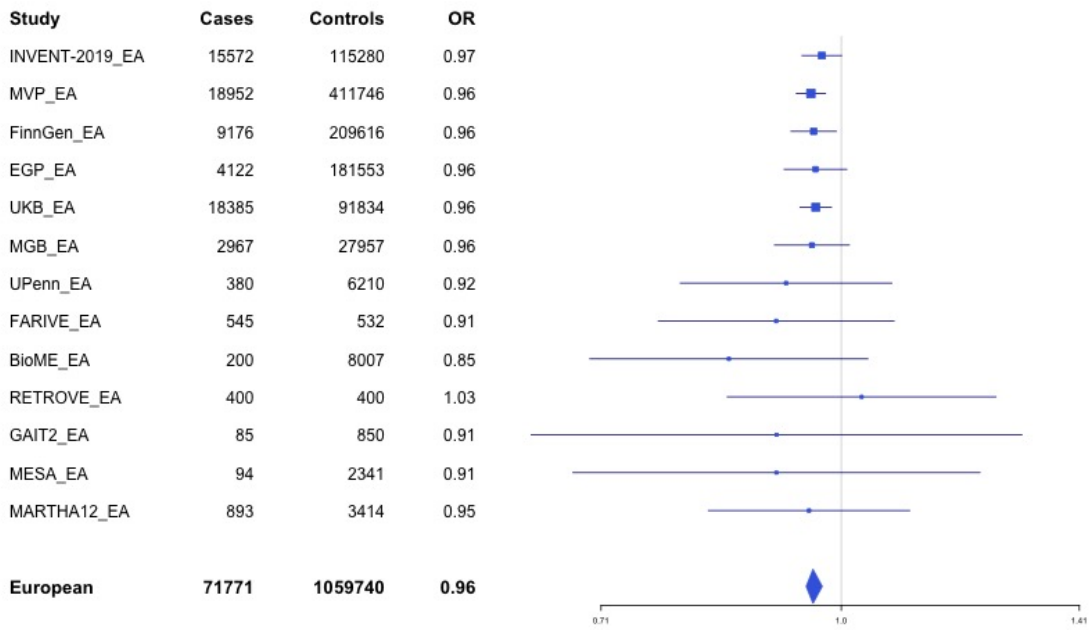

Supplementary Figure 3.52 – rs10886430 (chr10:121010256) in locus 75 (GRK5)

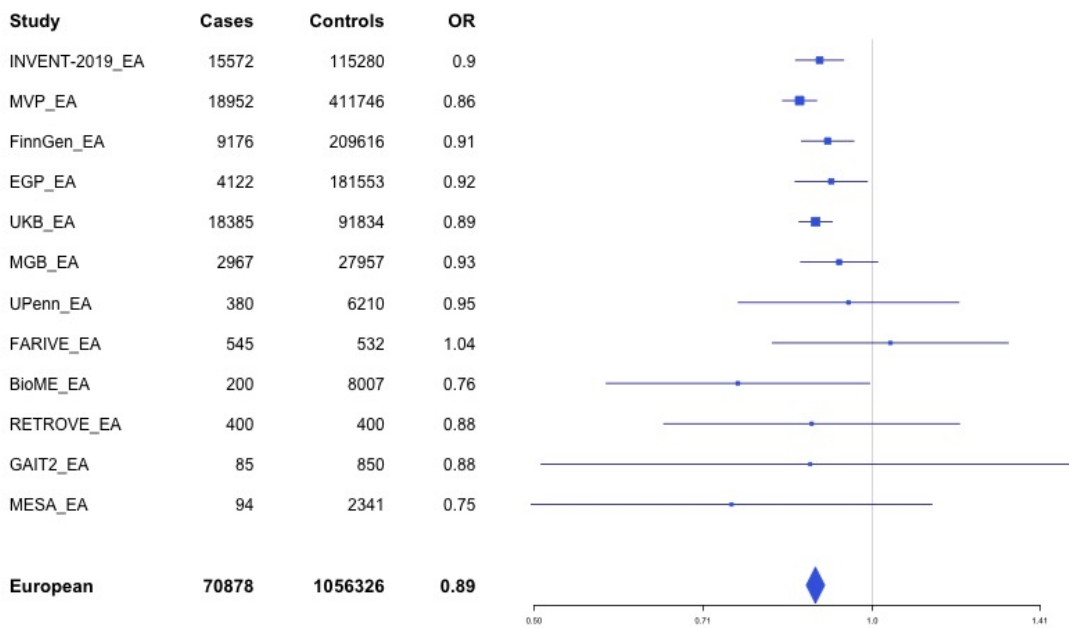

Supplementary Figure 3.53 – rs7122100 (chr11:10732560) in locus 76 (IRAG1;CTR9)

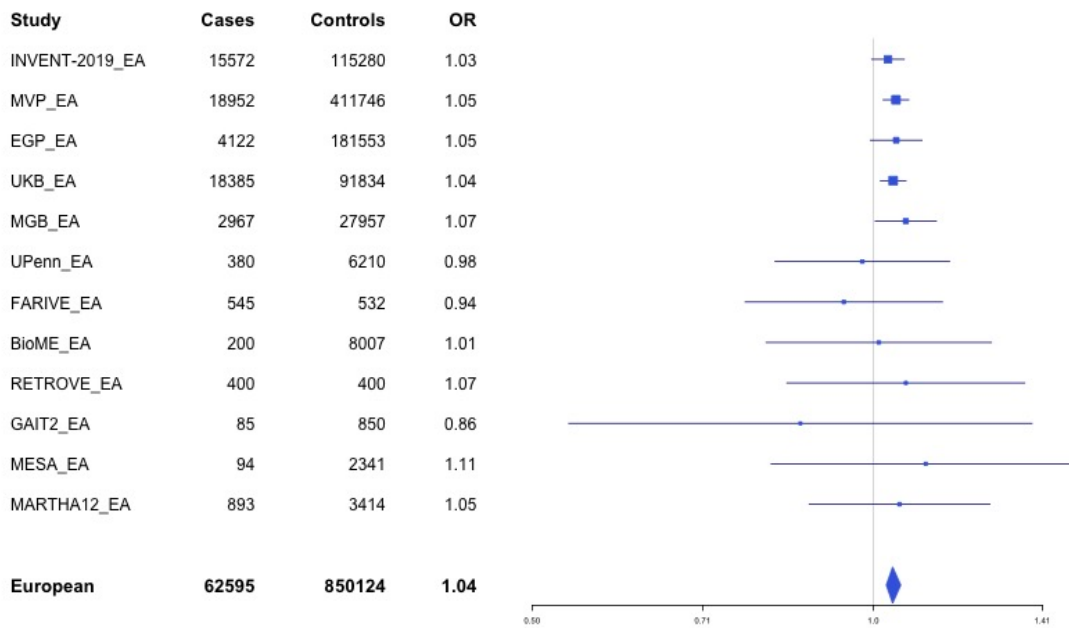

Supplementary Figure 3.54 – rs12800654 (chr11:16243320) in locus 77 (SOX6)

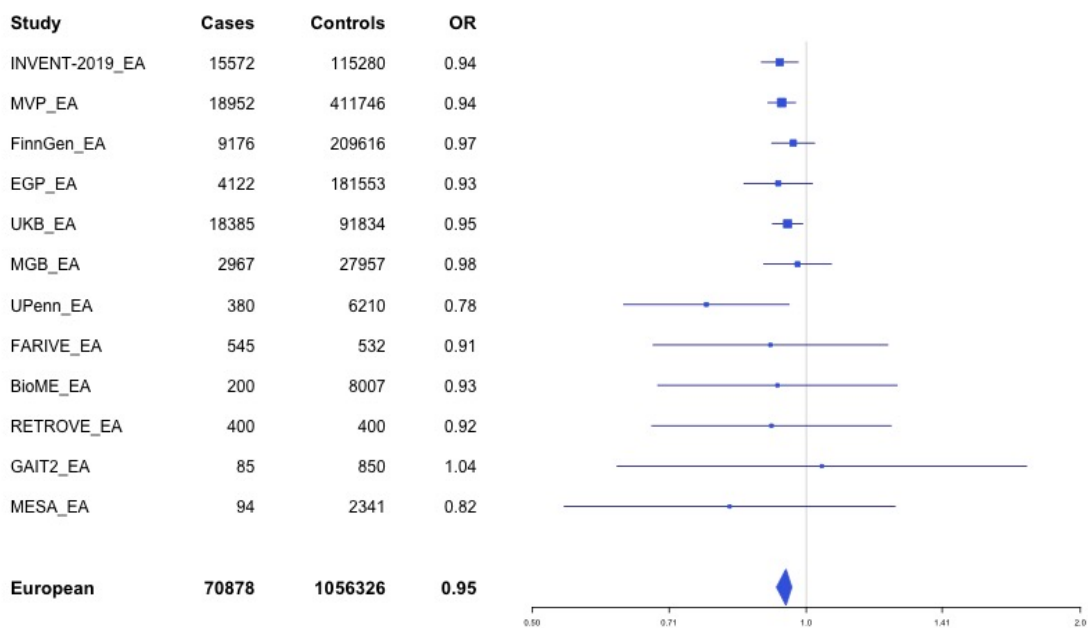

Supplementary Figure 3.55 – rs4755476 (chr11:32980428) in locus 78 (QSER1)

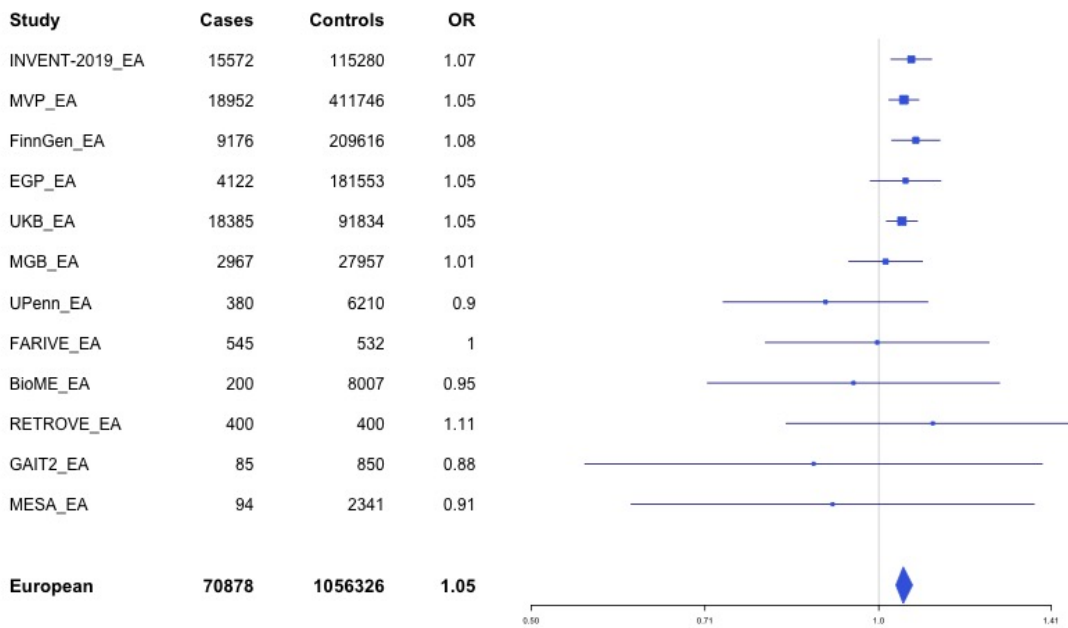

Supplementary Figure 3.56 – rs1799963 (chr11:46761055) in locus 79 (F2)

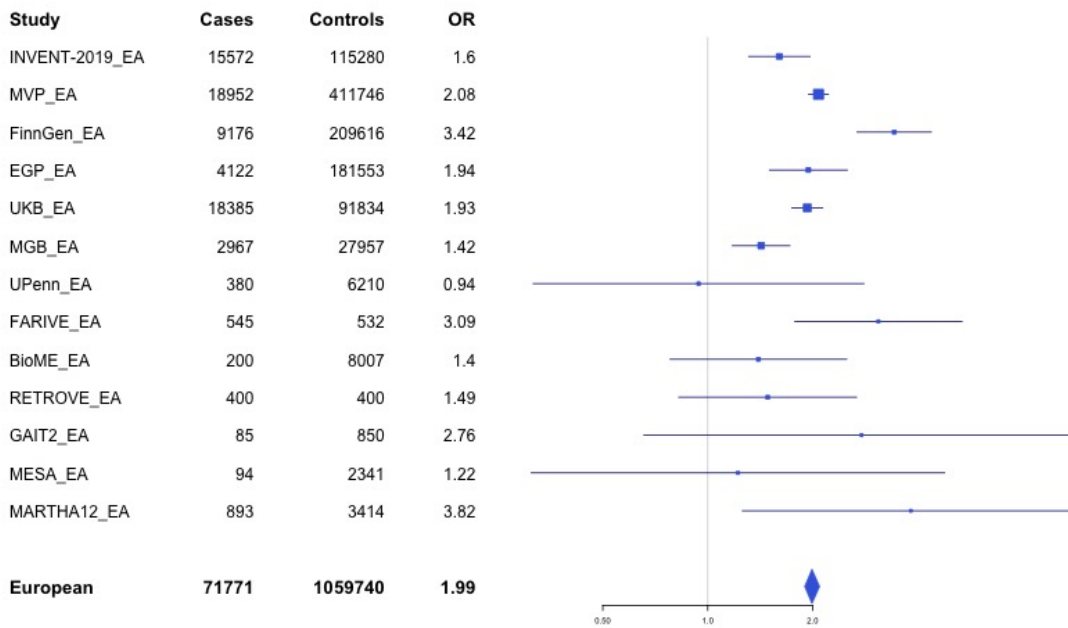

Supplementary Figure 3.57 – rs141798115 (chr11:56875074) in locus 80 (OR5AK4P ;LRRC55)

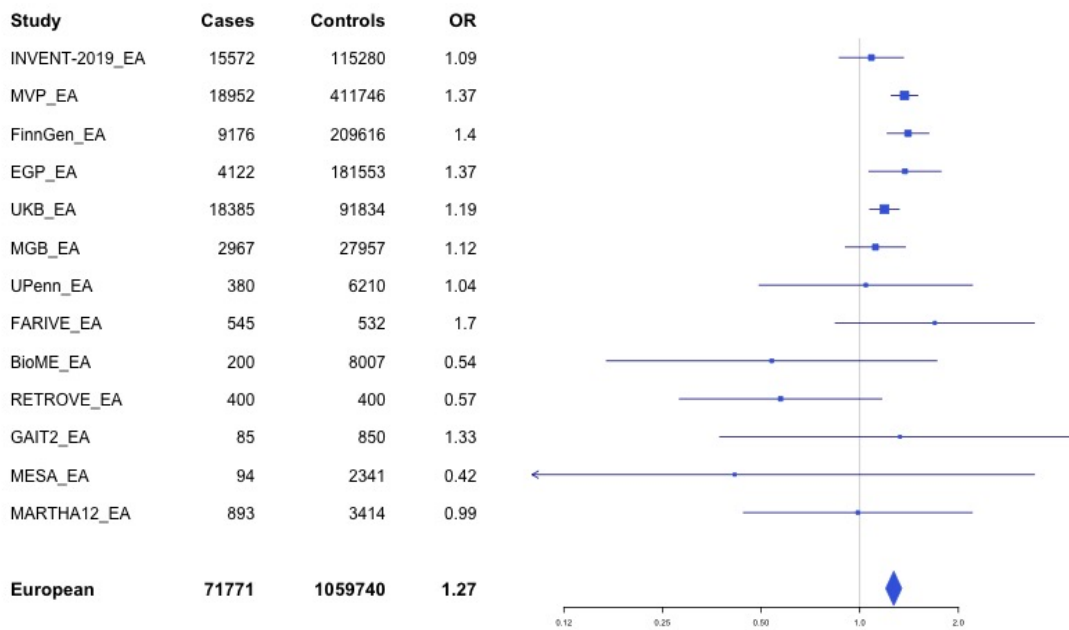

Supplementary Figure 3.58 – rs55777218 (chr11:60070946) in locus 81 (MS4A4A)

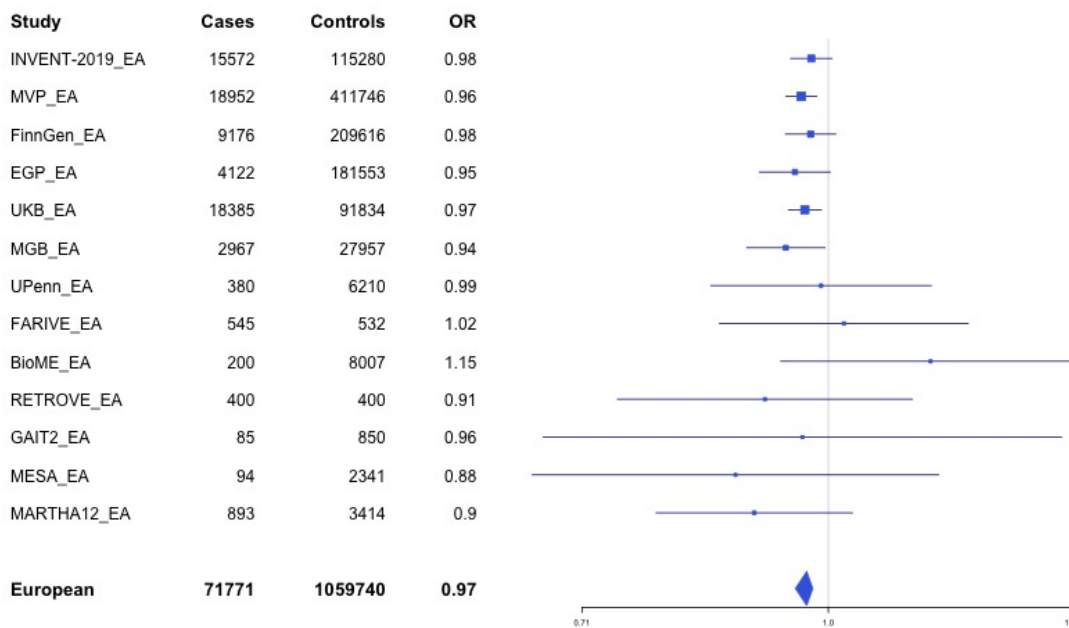

Supplementary Figure 3.59 – rs174551 (chr11:61573684) in locus 82 (FADS1)

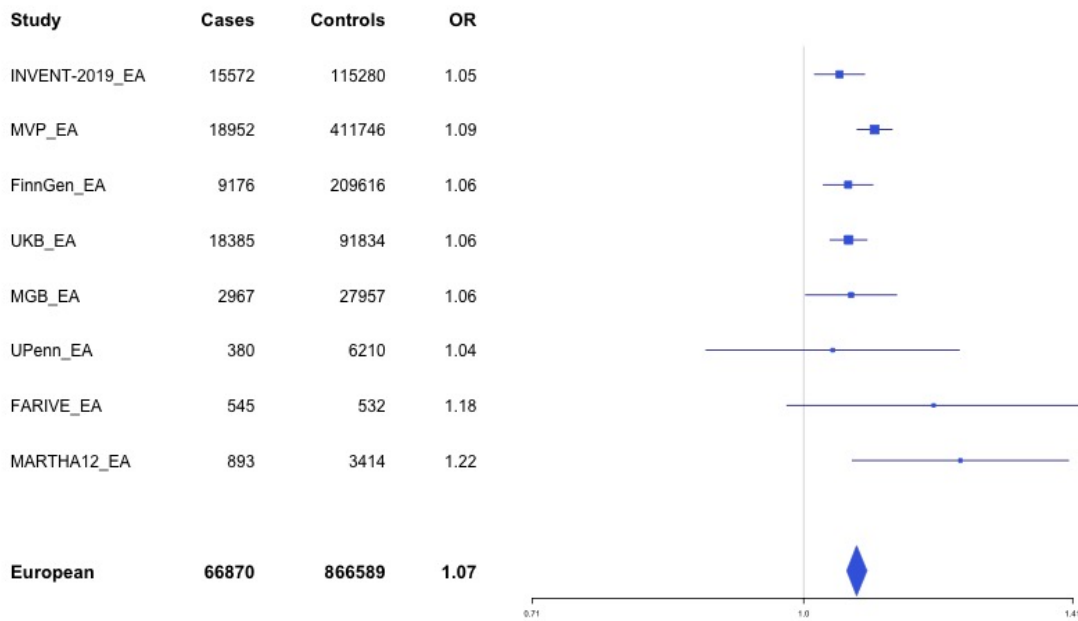

Supplementary Figure 3.60 – rs1145656 (chr11:73305859) in locus 83 (FAM168A)

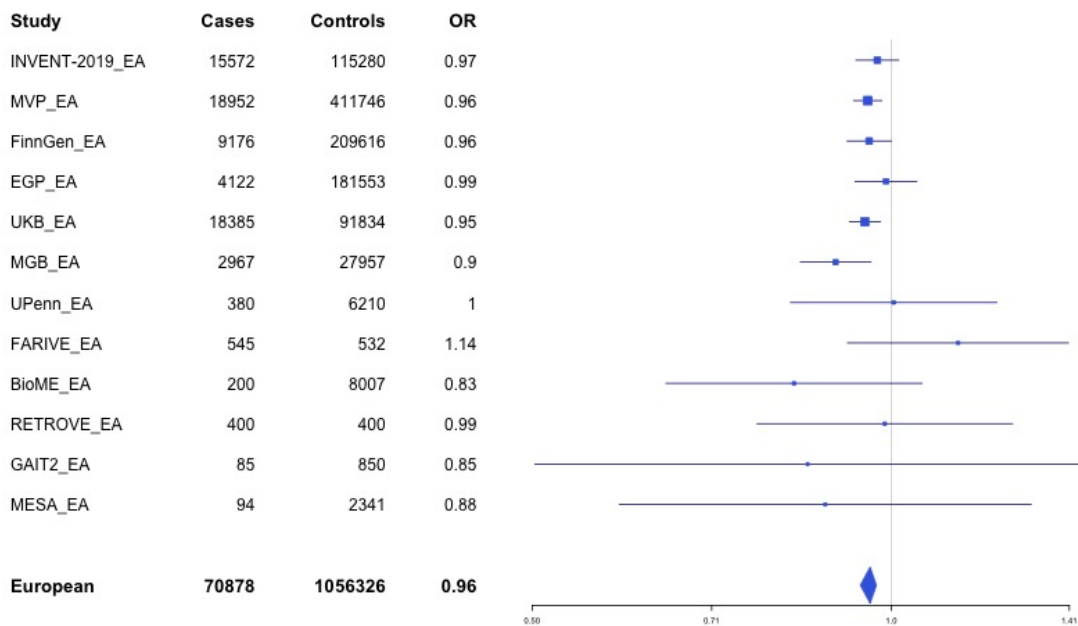



Supplementary Figure 3.61 – rs1997547 (chr11:114002744) in locus 84 (ZBTB16)

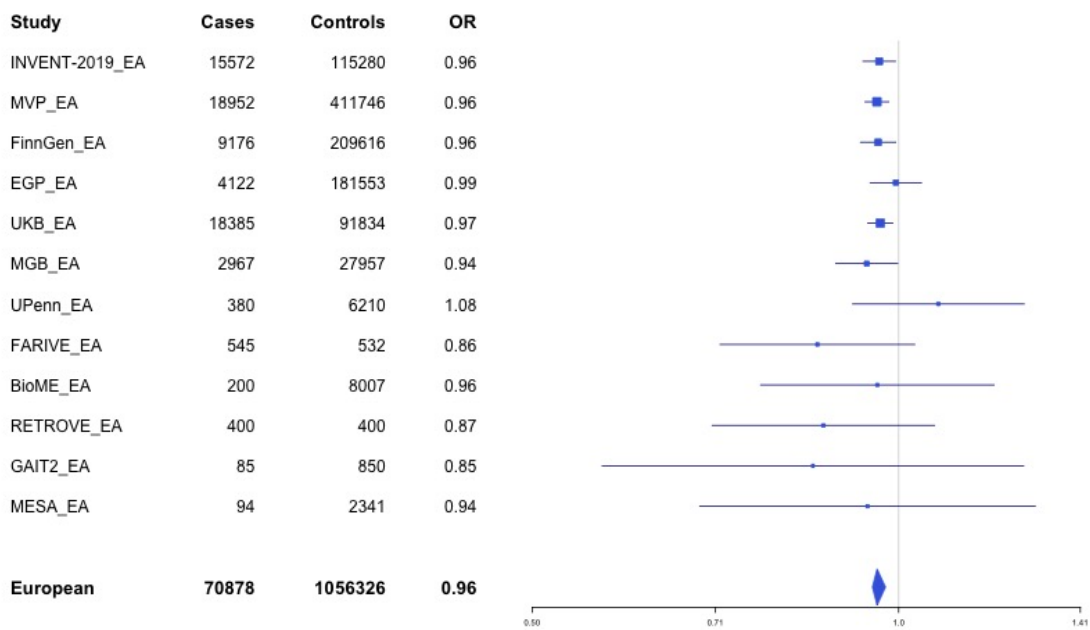

Supplementary Figure 3.62 – rs35257264 (chr11:126296816) in locus 85 (ST3GAL4)

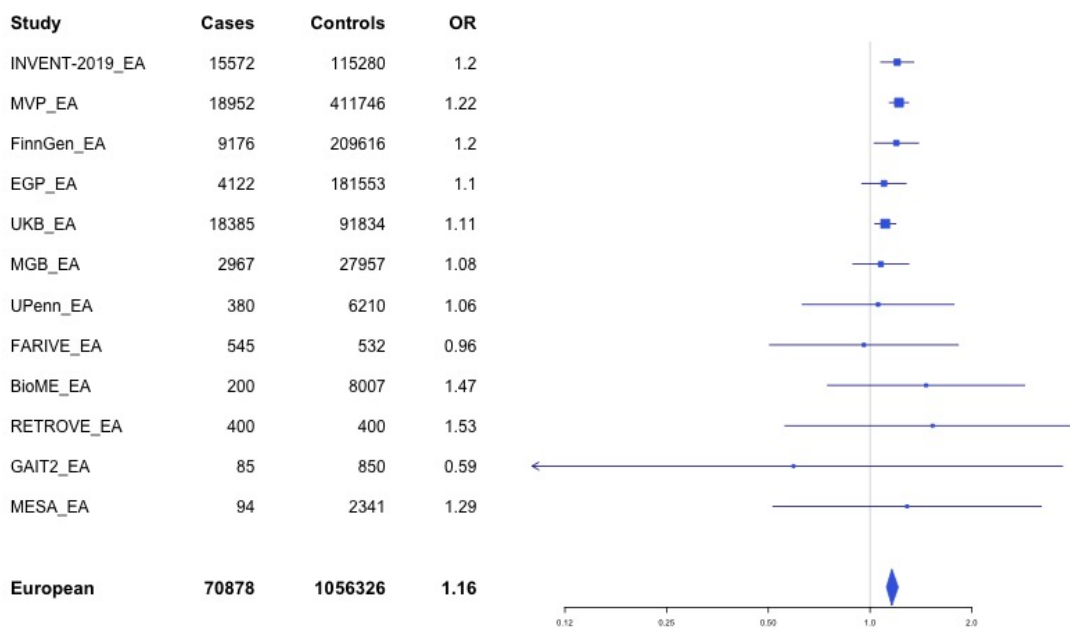

Supplementary Figure 3.63 – rs7135039 (chr12:6160614) in locus 87 (VWF)

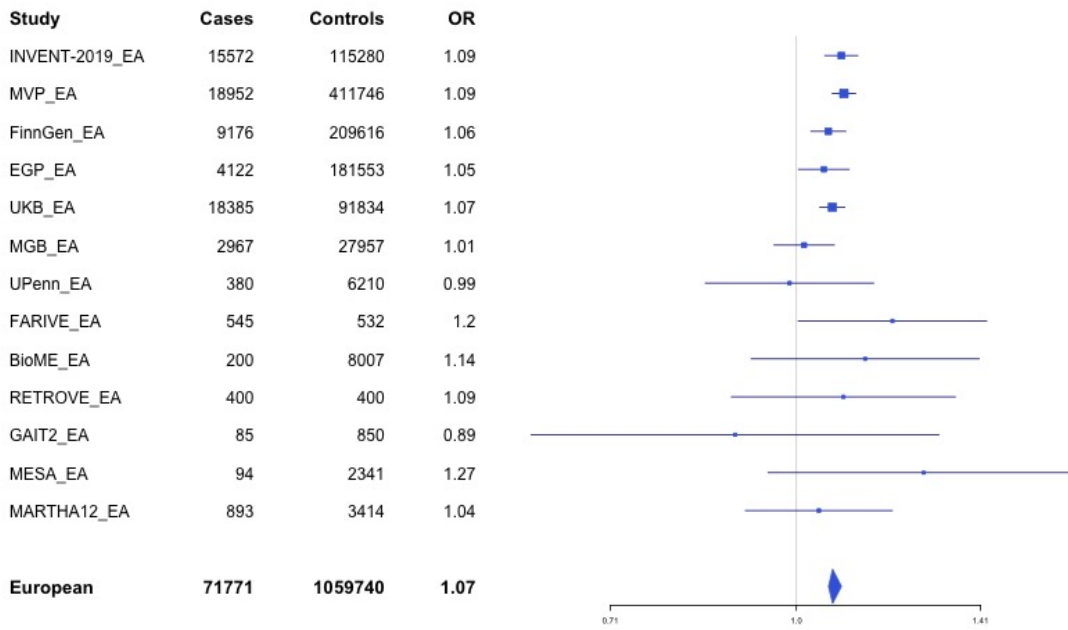

Supplementary Figure 3.64 – rs7311483 (chr12:9053661) in locus 88 (A2ML1;PHC1)

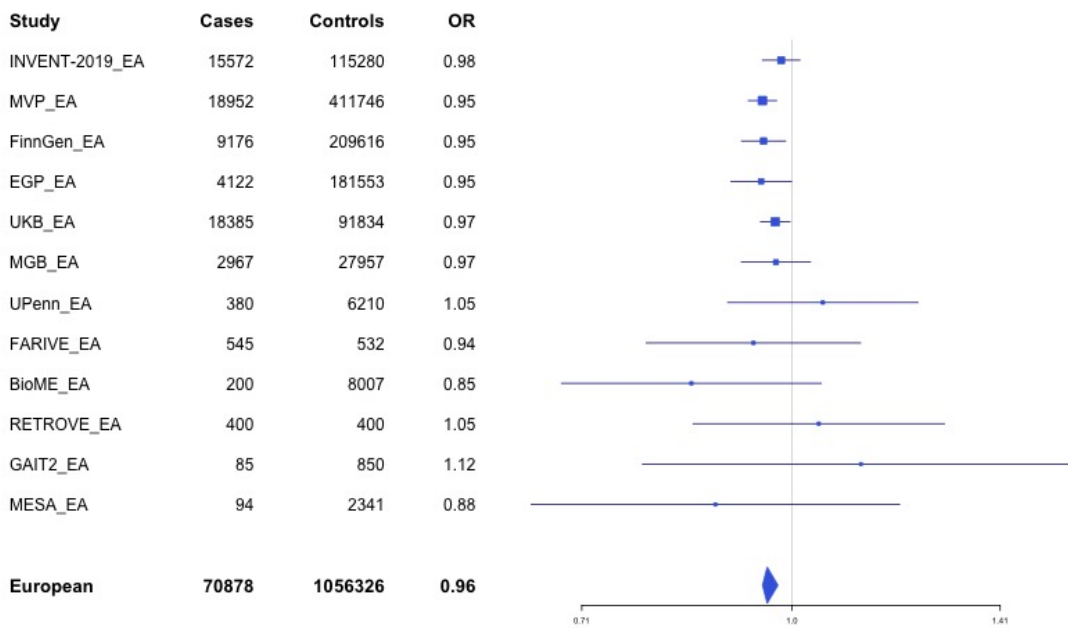

Supplementary Figure 3.65 – rs4759076 (chr12:54729872) in locus 89 (COPZ1)

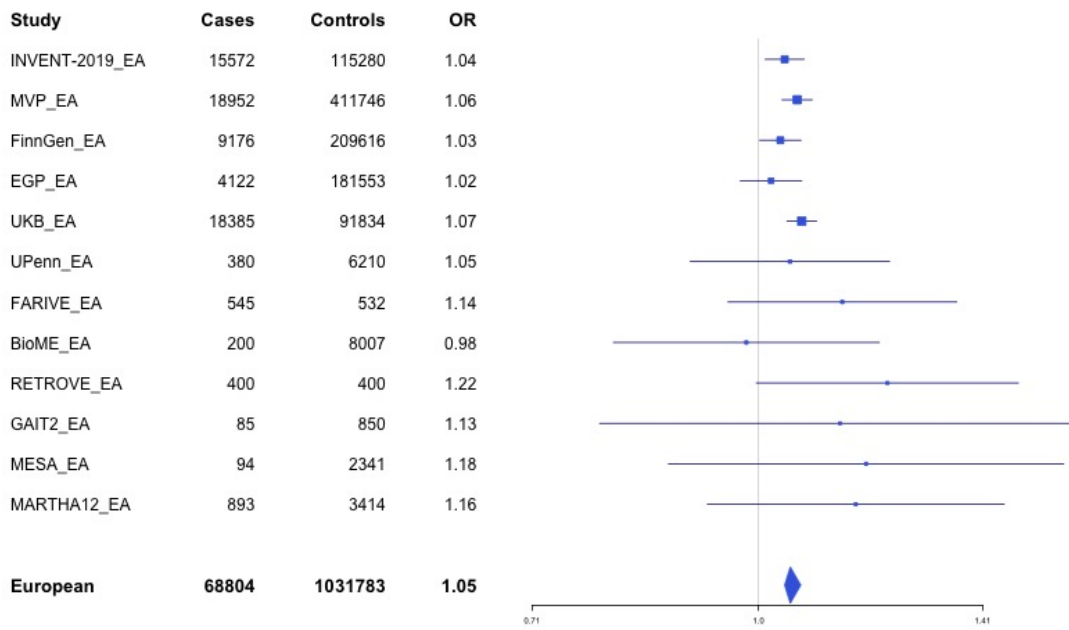

Supplementary Figure 3.66 – rs142351376 (chr12:104136288) in locus 90 (STAB2)

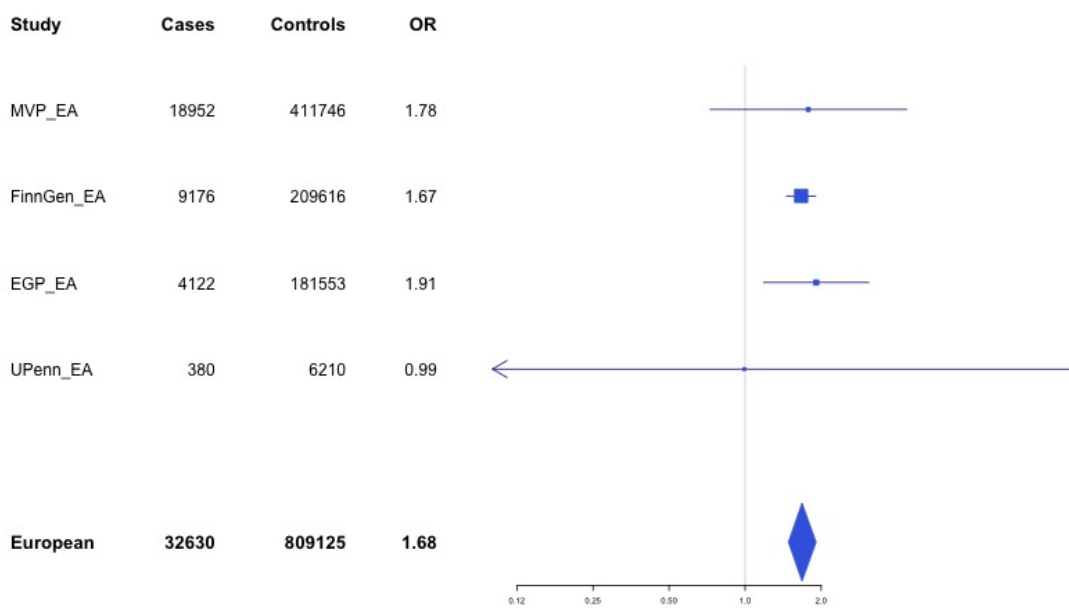

Supplementary Figure 3.67 – rs56750693 (chr12:112144586) in locus 91 (ACAD10)

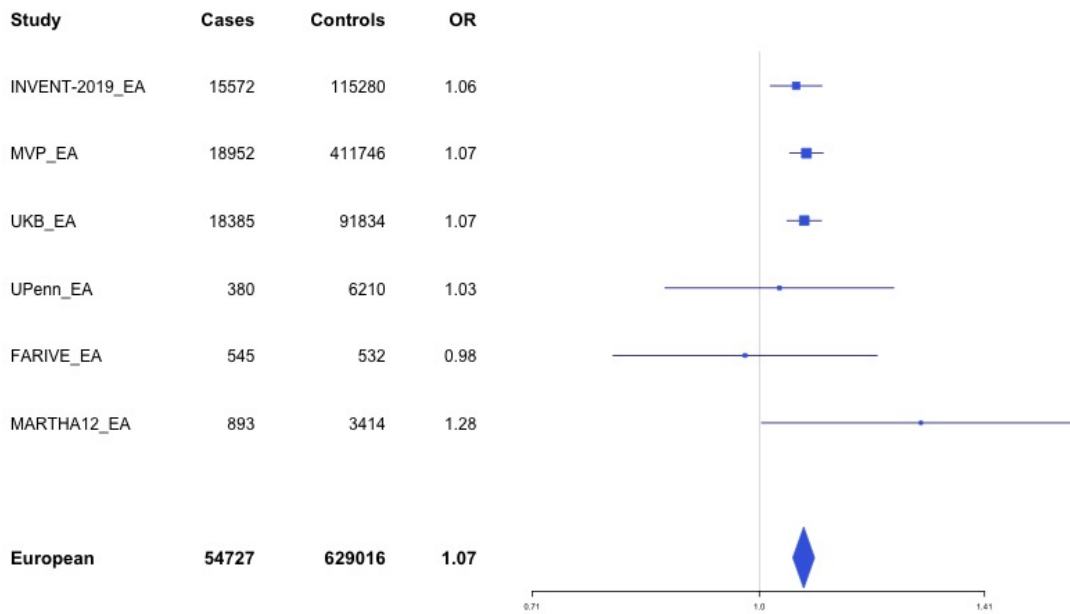

Supplementary Figure 3.68 – rs2851436 (chr12:123667354) in locus 92 (MPHOSPH9)

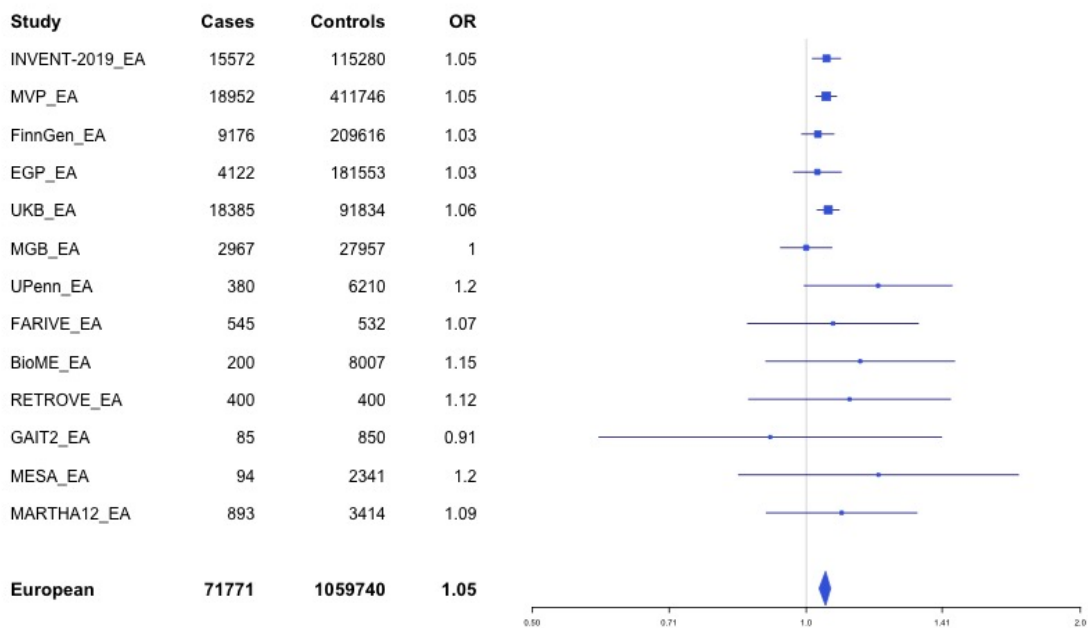

Supplementary Figure 3.69 – rs3211752 (chr13:113787459) in locus 94 (F10)

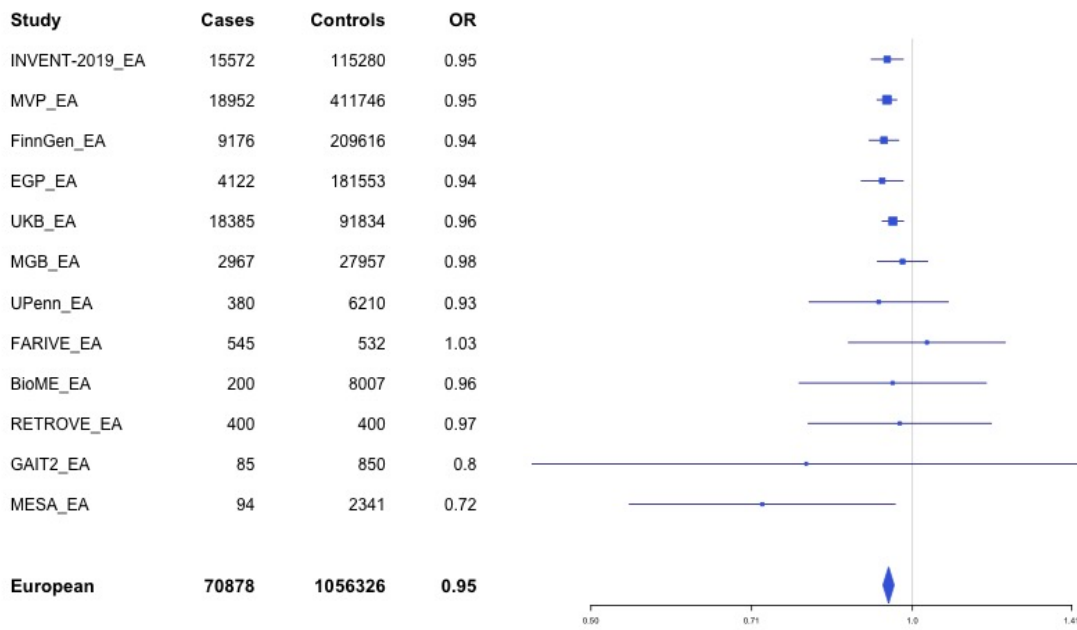

Supplementary Figure 3.70 – rs8004077 (chr14:58846731) in locus 95 (ARID4A ;TOMM20L)

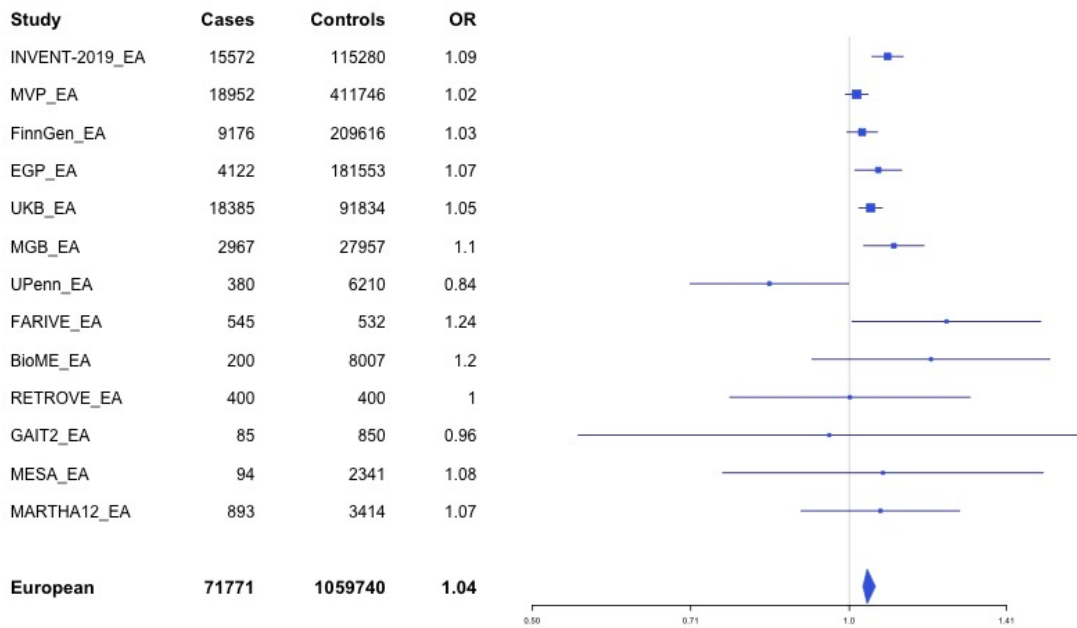

Supplementary Figure 3.71 – rs2127869 (chr14:65794352) in locus 96 (LINC02324;MIR4708)

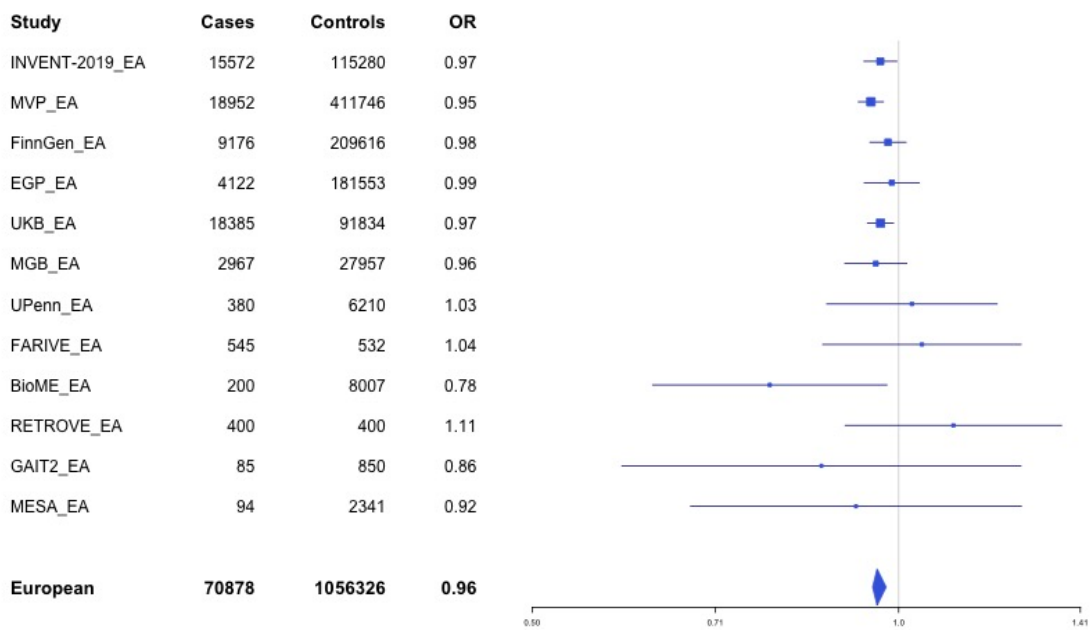

Supplementary Figure 3.72 – rs61990092 (chr14:92289301) in locus 97 (TC2N)

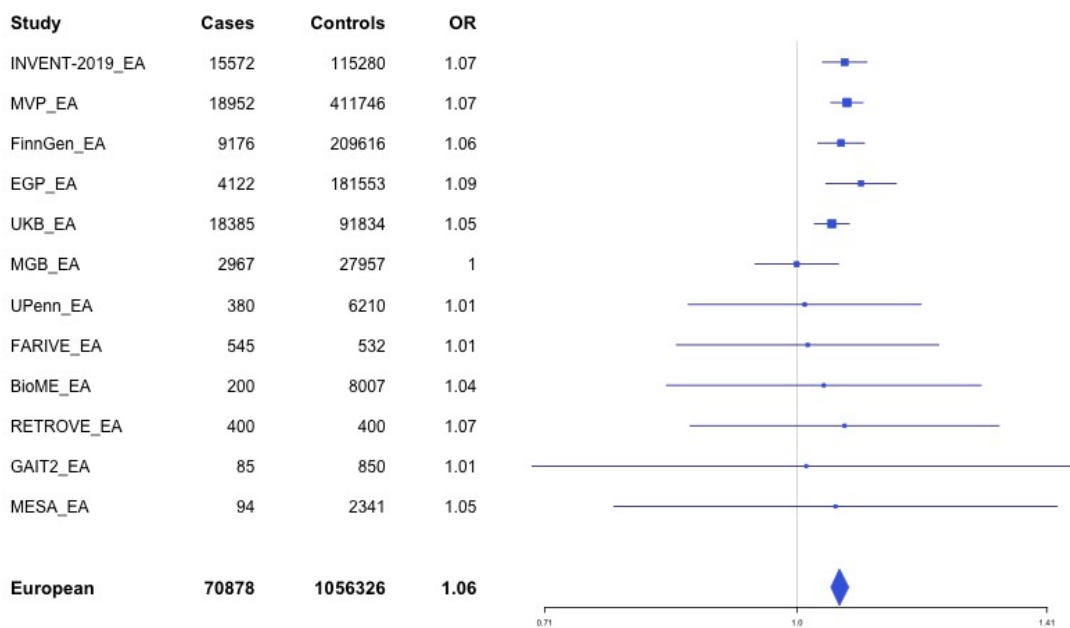

Supplementary Figure 3.73 – rs28929474 (chr14:94844947) in locus 98 (SERPINA1)

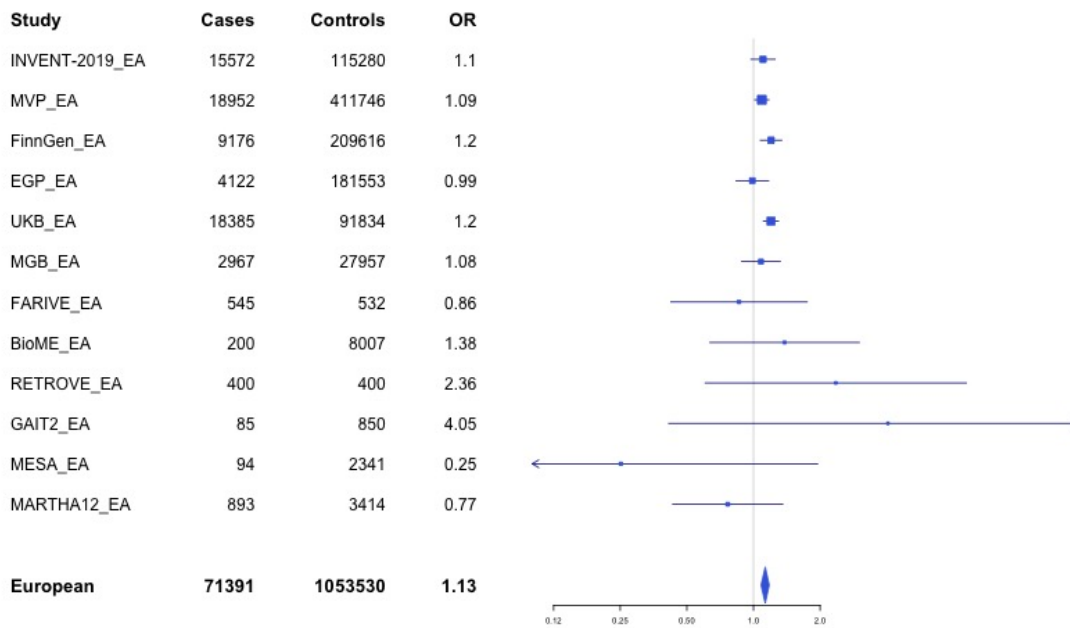

Supplementary Figure 3.74 – rs4906229 (chr14:103057511) in locus 99 (LINC02323;RCOR1)

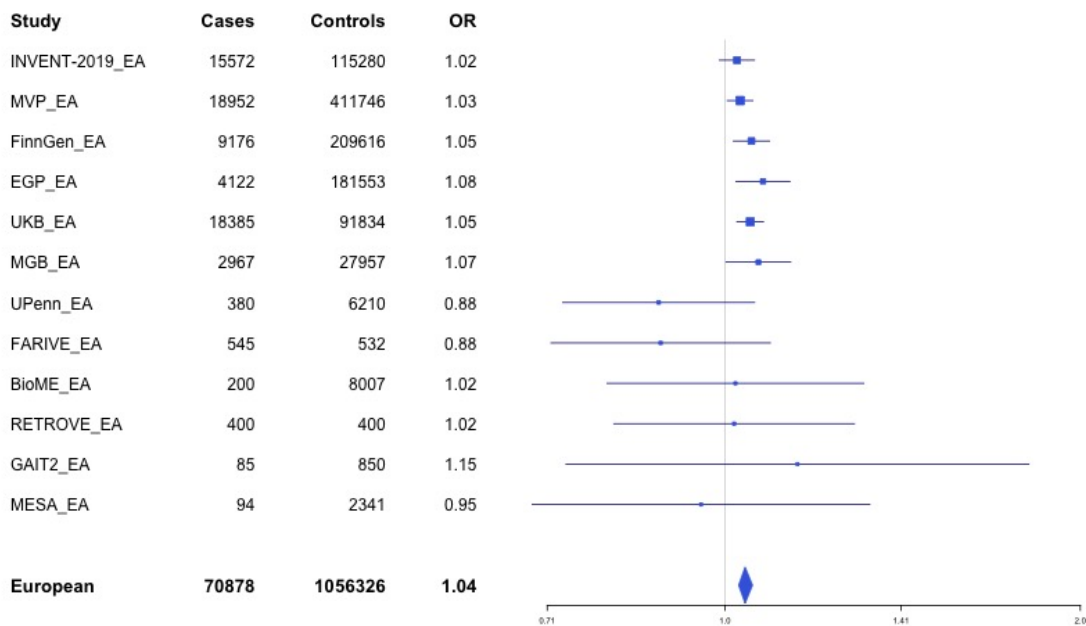

**Supplementary Figure 3.75** – rs141866277 (chr15:43950699) in locus 100 (PPIP5K1P1-CATSPER2)

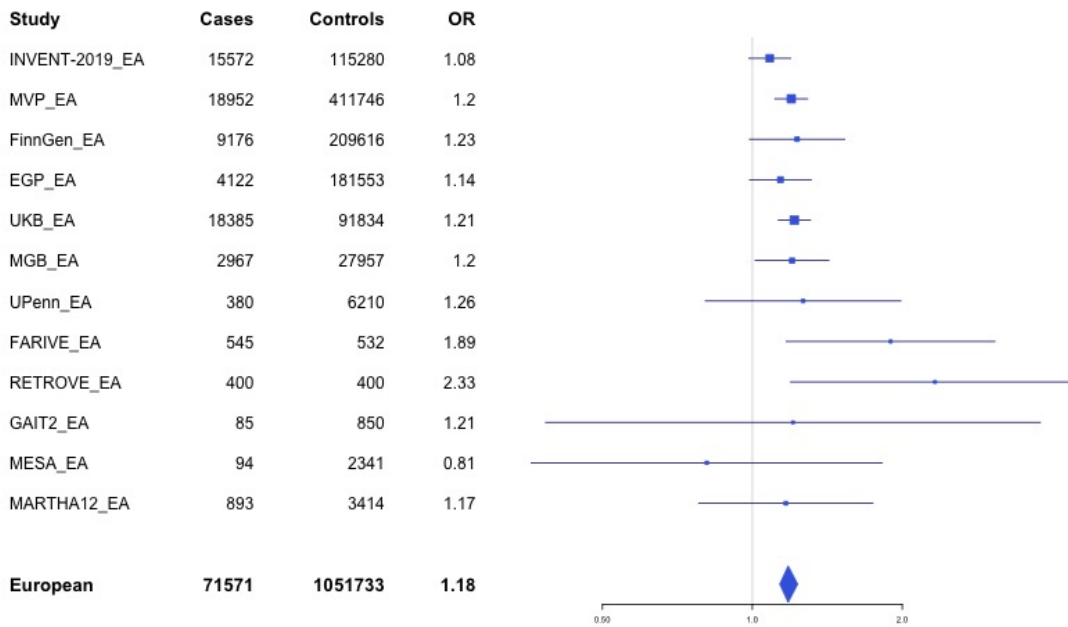

**Supplementary Figure 3.76** – rs340009 (chr15:60899639) in locus 101 (RORA-AS1)

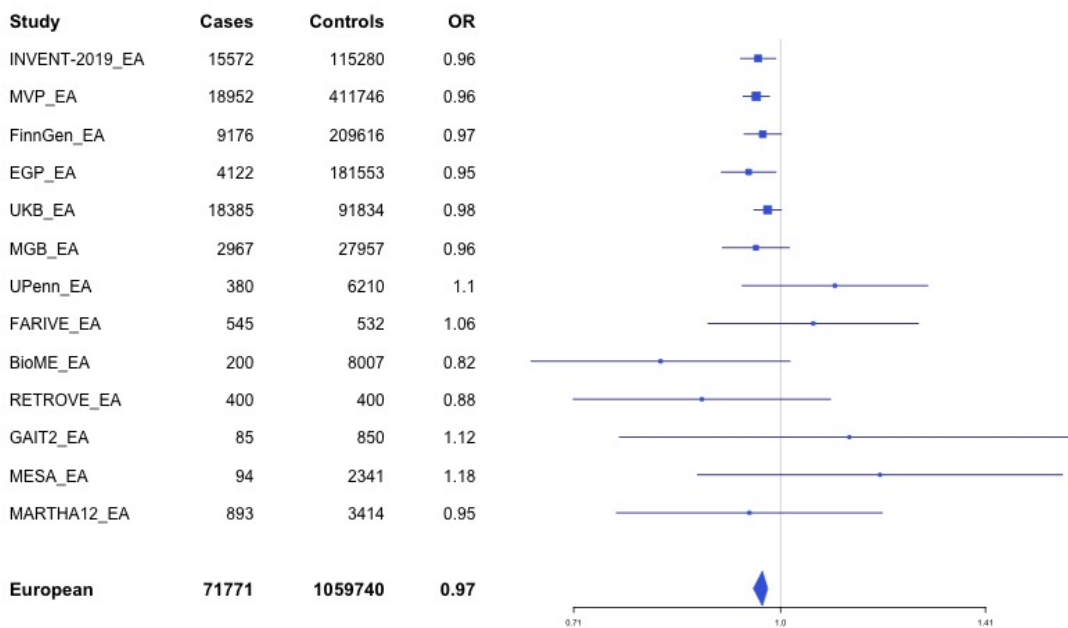



**Supplementary Figure 3.77** – rs7183672 (chr15:96101018) in locus 103 (LINC00924;LOC105369212)

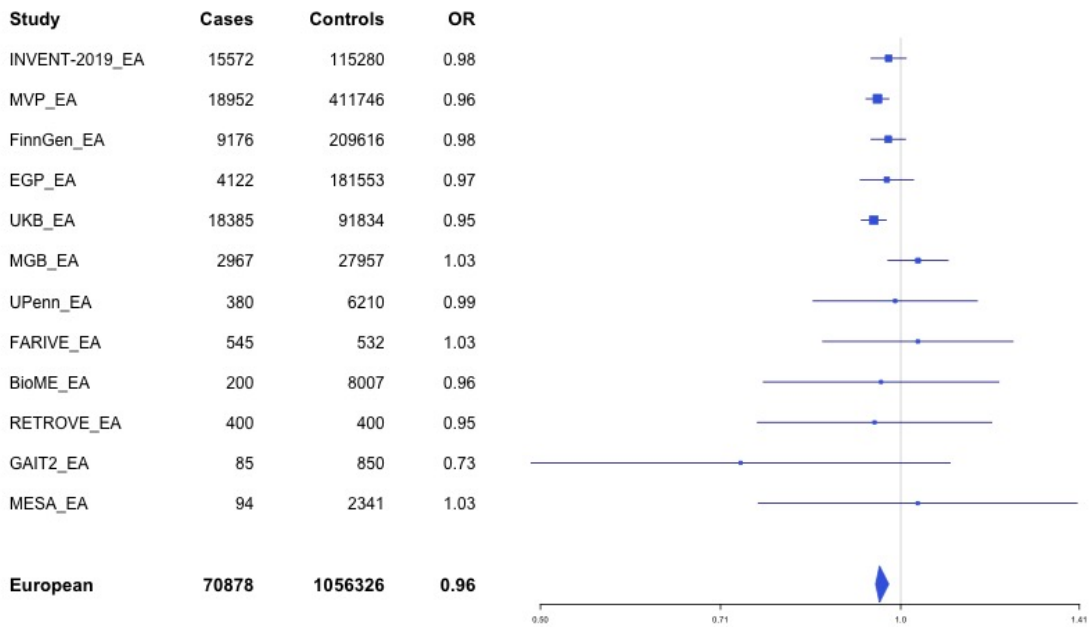

**Supplementary Figure 3.78** – rs12443808 (chr16:30996871) in locus 106 (HSD3B7)

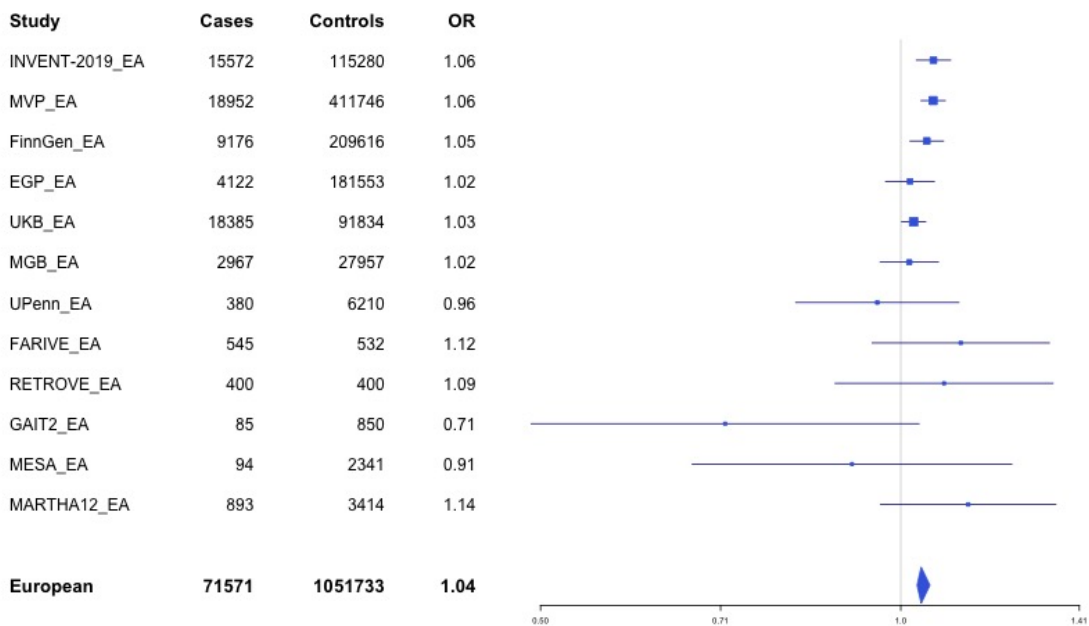

Supplementary Figure 3.79 – rs1346057617 (chr16:75434183) in locus 108 (CFDP1)

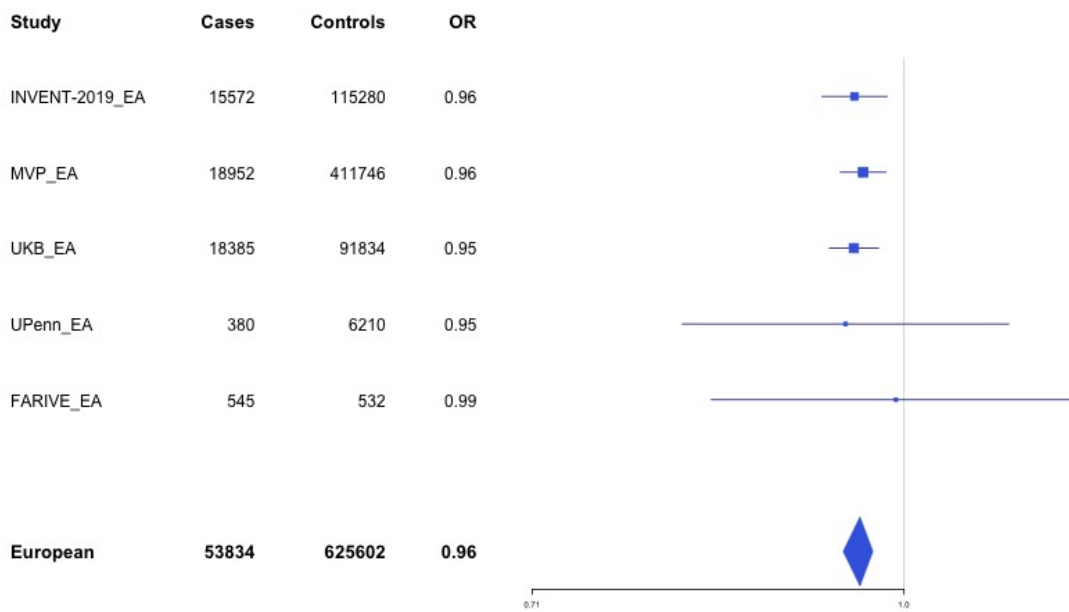

Supplementary Figure 3.80 – rs62044142 (chr16:81868968) in locus 109 (PLCG2)

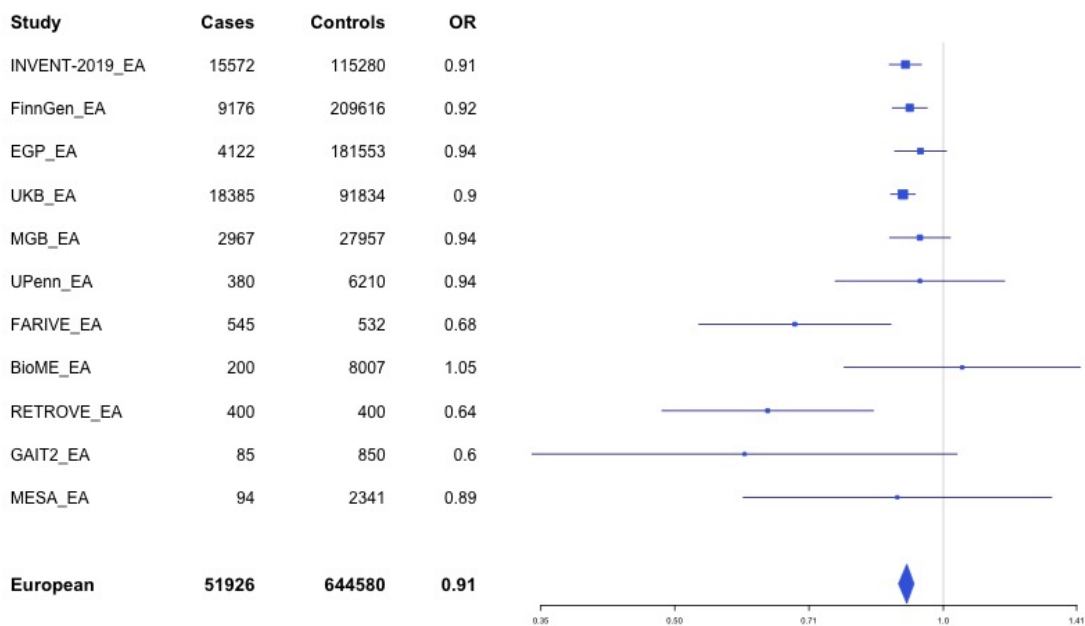

Supplementary Figure 3.81 – rs28634651 (chr16:88553198) in locus 111 (ZFPM1)

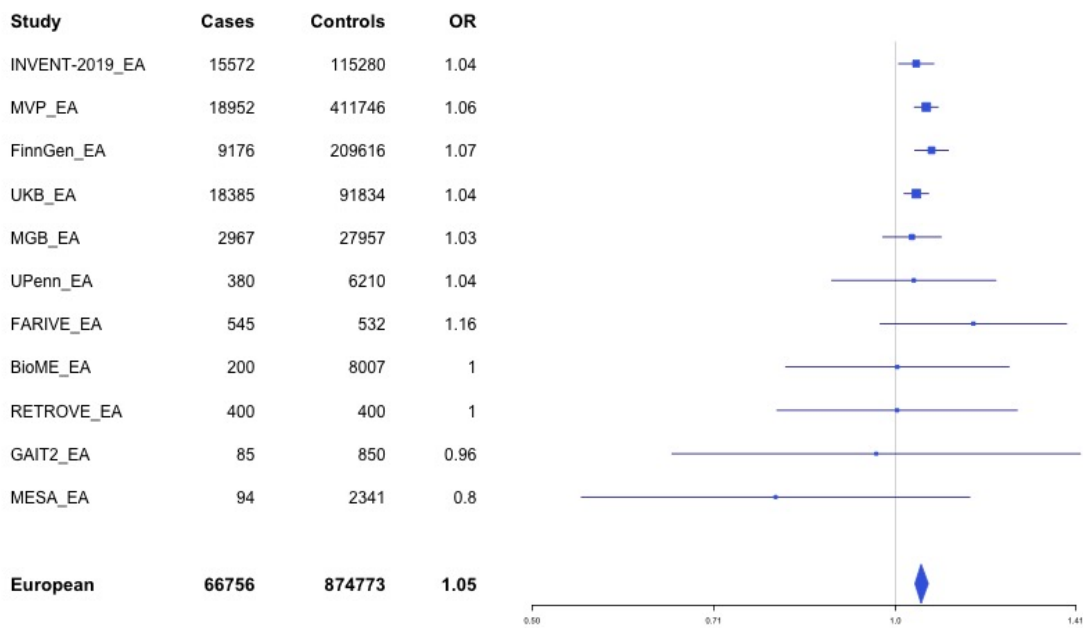

Supplementary Figure 3.82 – rs4790311 (chr17:1979188) in locus 112 (SMG6)

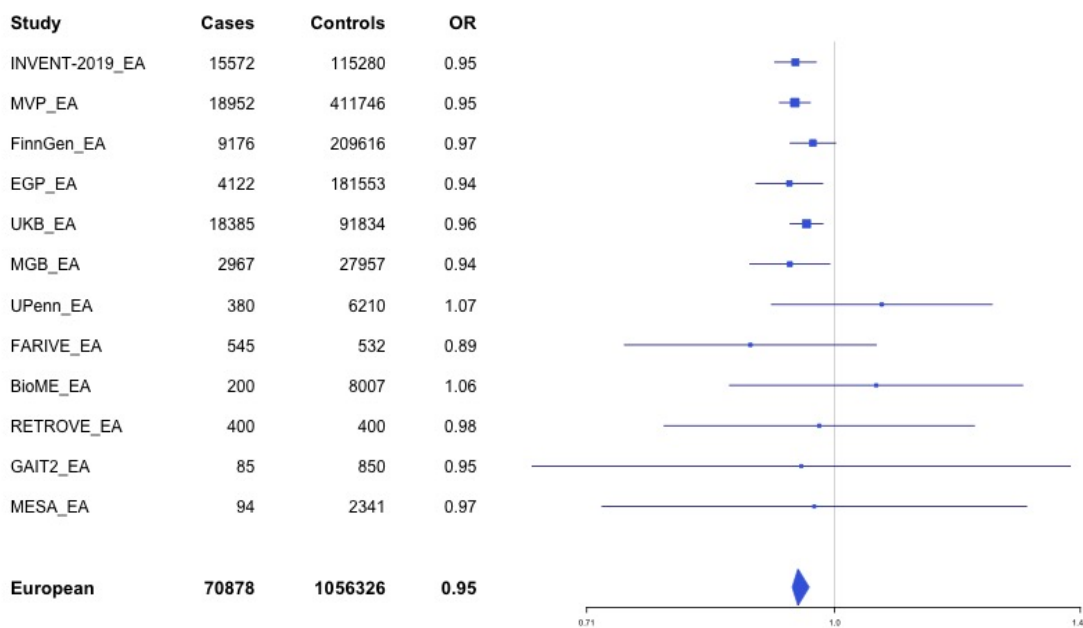

Supplementary Figure 3.83 – rs11078659 (chr17:6903944) in locus 113 (ALOX12-AS1)

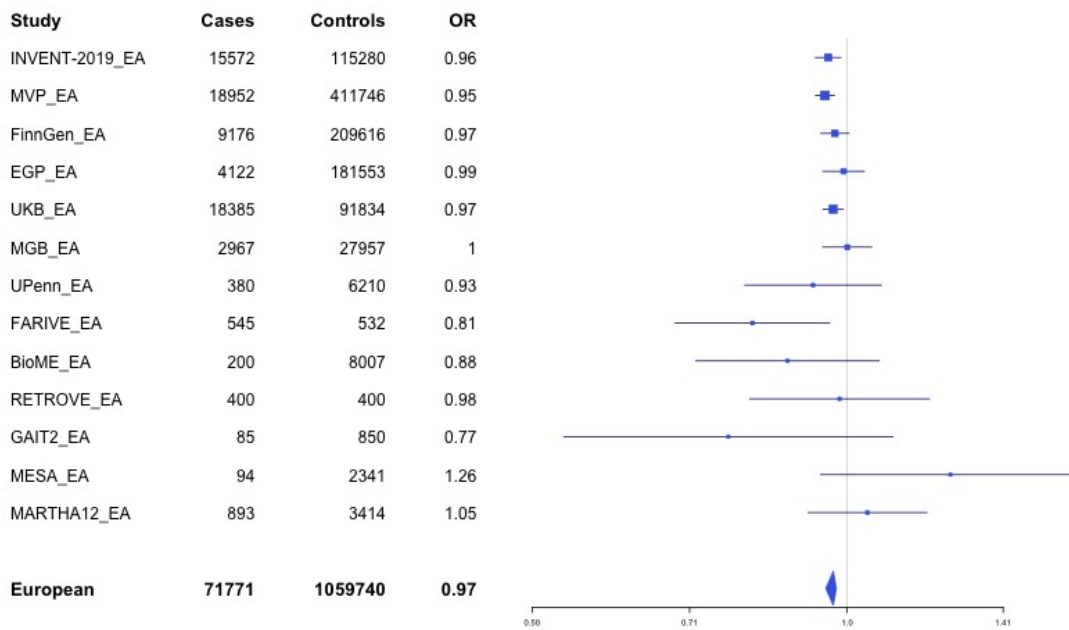

Supplementary Figure 3.84 – rs536327 (chr17:27857698) in locus 114 (TAOK1)

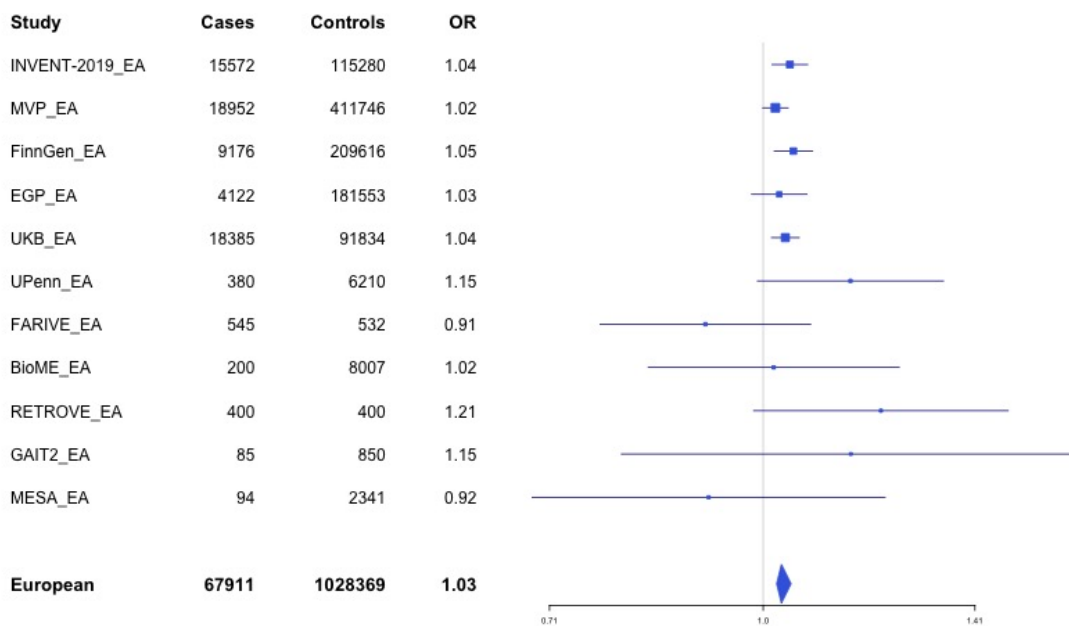

Supplementary Figure 3.85 – rs9468 (chr17:44101563) in locus 115 (MAPT)

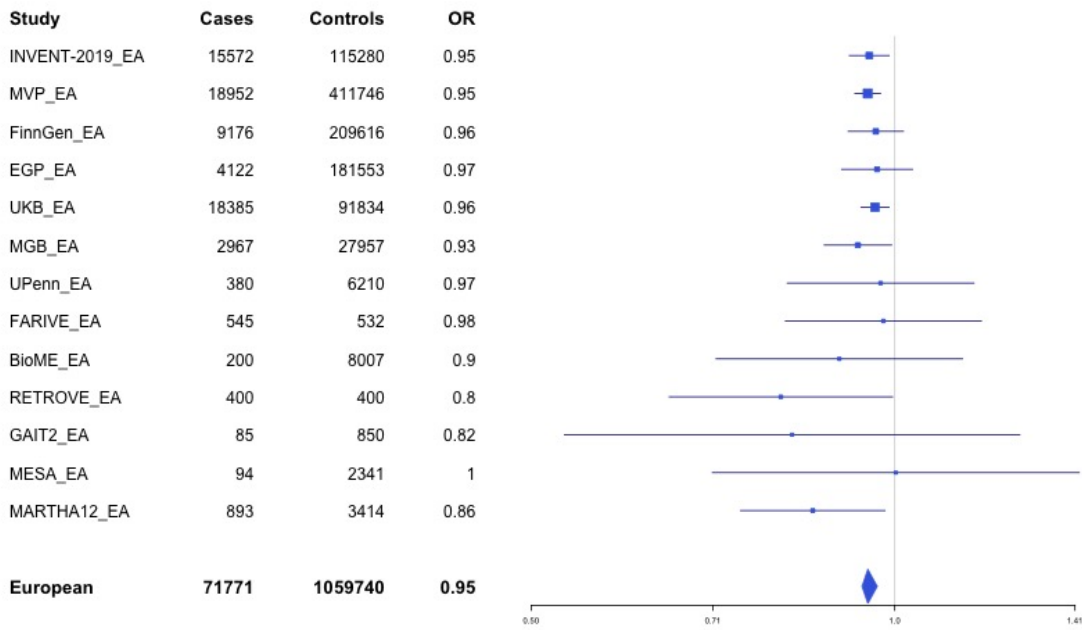

Supplementary Figure 3.86 – rs1801690 (chr17:64208285) in locus 116 (APOH)

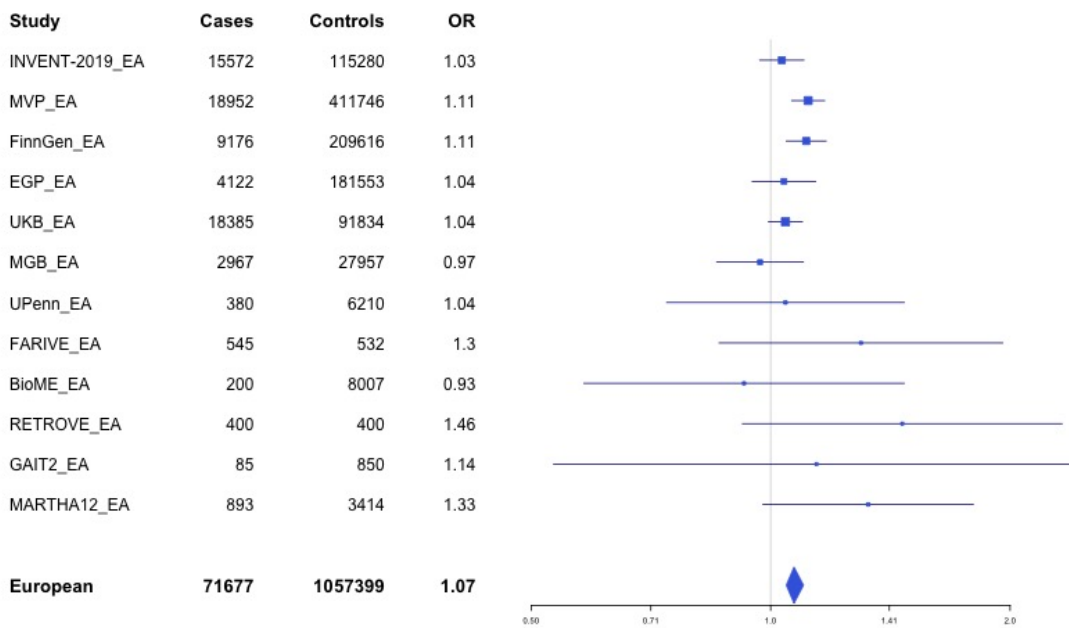

Supplementary Figure 3.87 – rs573431210 (chr17:67276383) in locus 117 (ABCA5)

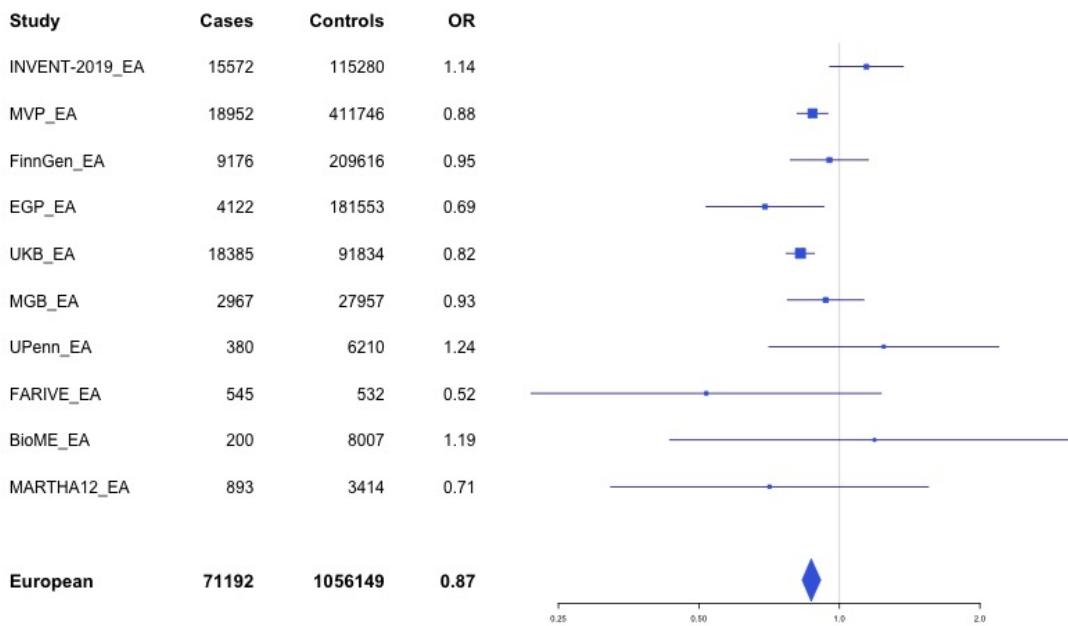

Supplementary Figure 3.88 – rs8109681 (chr19:10738836) in locus 119 (SLC44A2)

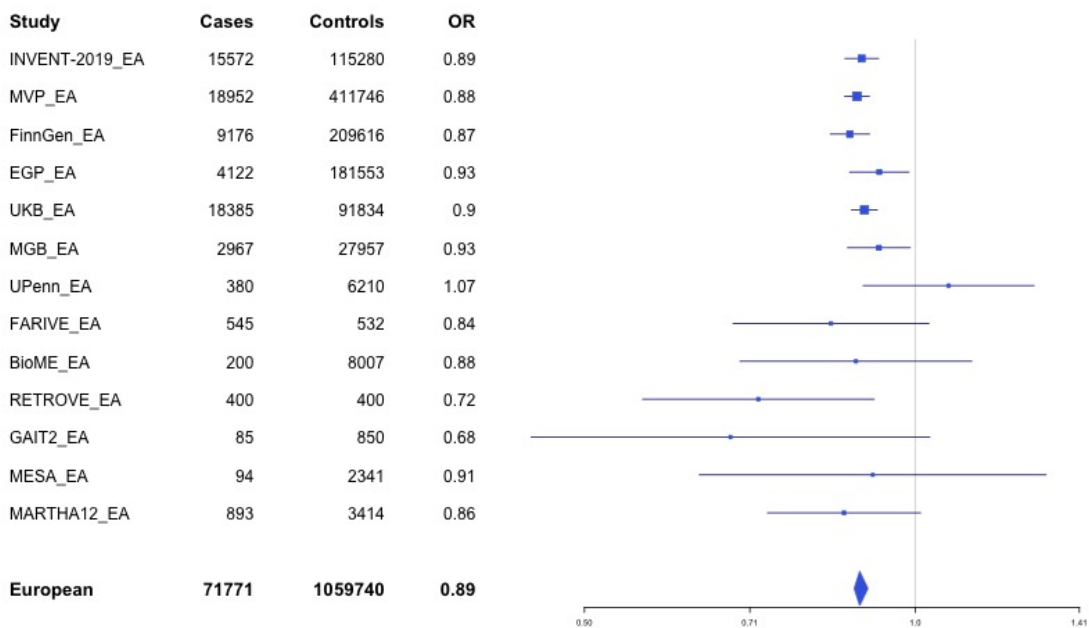

Supplementary Figure 3.89 – rs2545774 (chr19:41287674) in locus 121 (RAB4B)

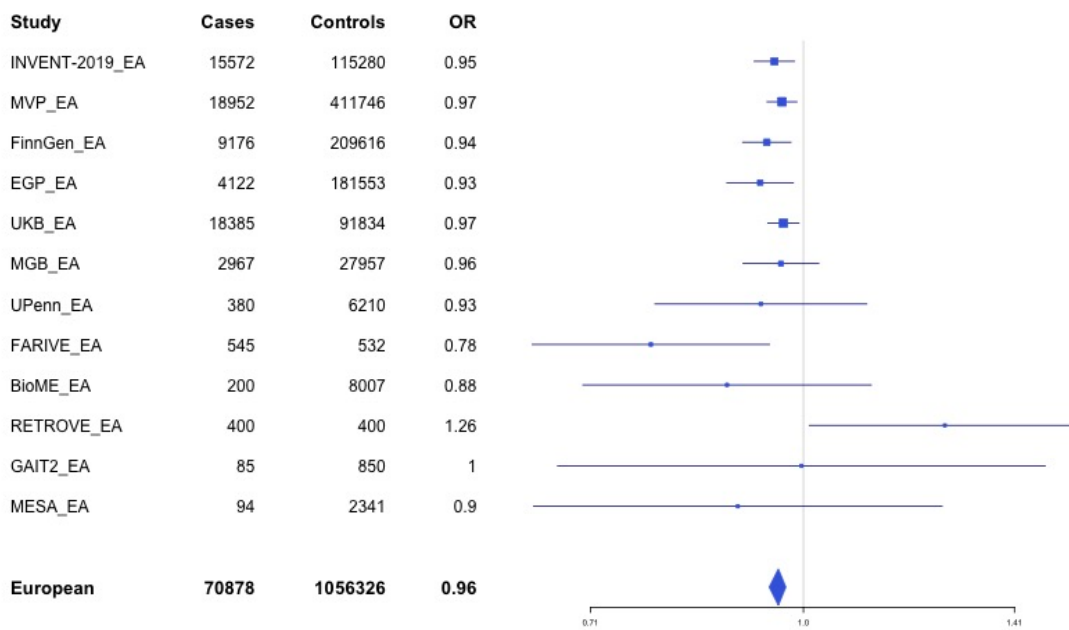

Supplementary Figure 3.90 – rs8108474 (chr19:46301479) in locus 122 (RSPH6A)

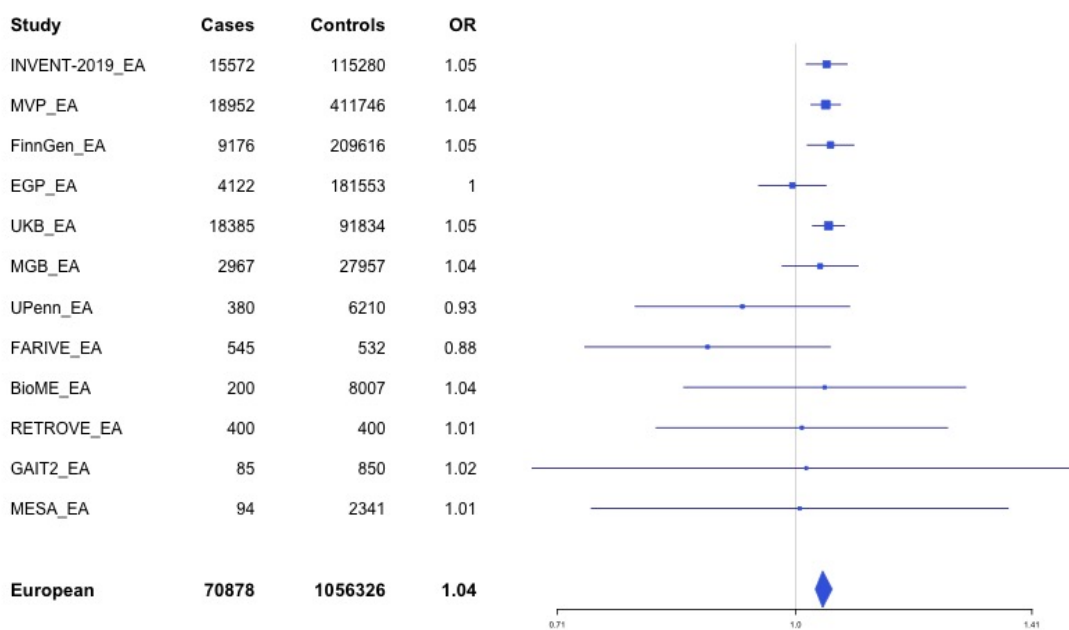

Supplementary Figure 3.91 – rs646327 (chr19:49209851) in locus 123 (FUT2)

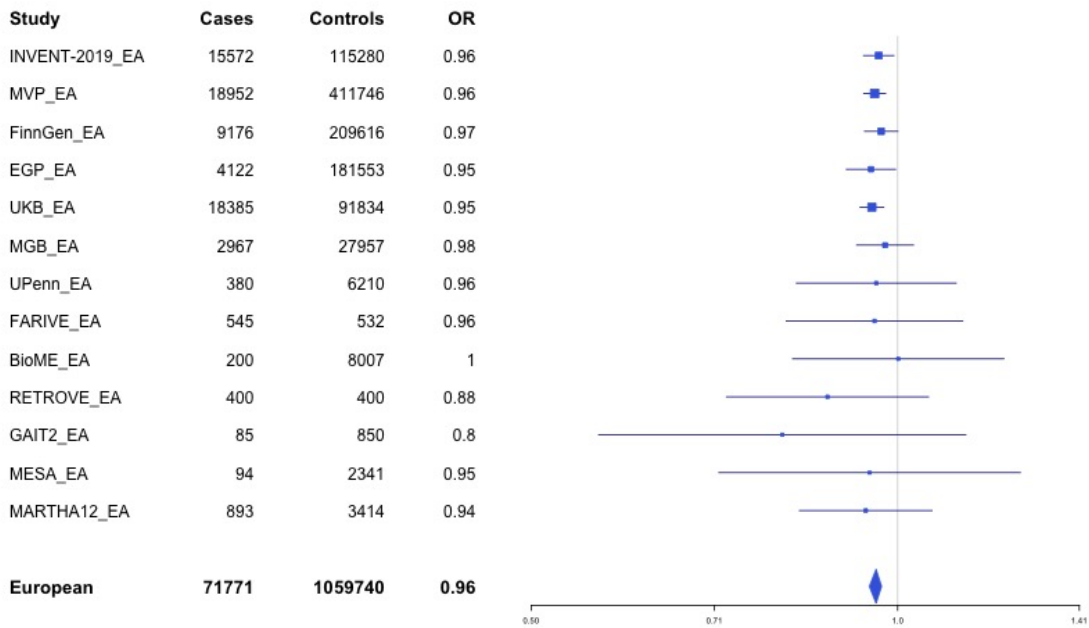

Supplementary Figure 3.92 – rs1654425 (chr19:55538980) in locus 124 (GP6)

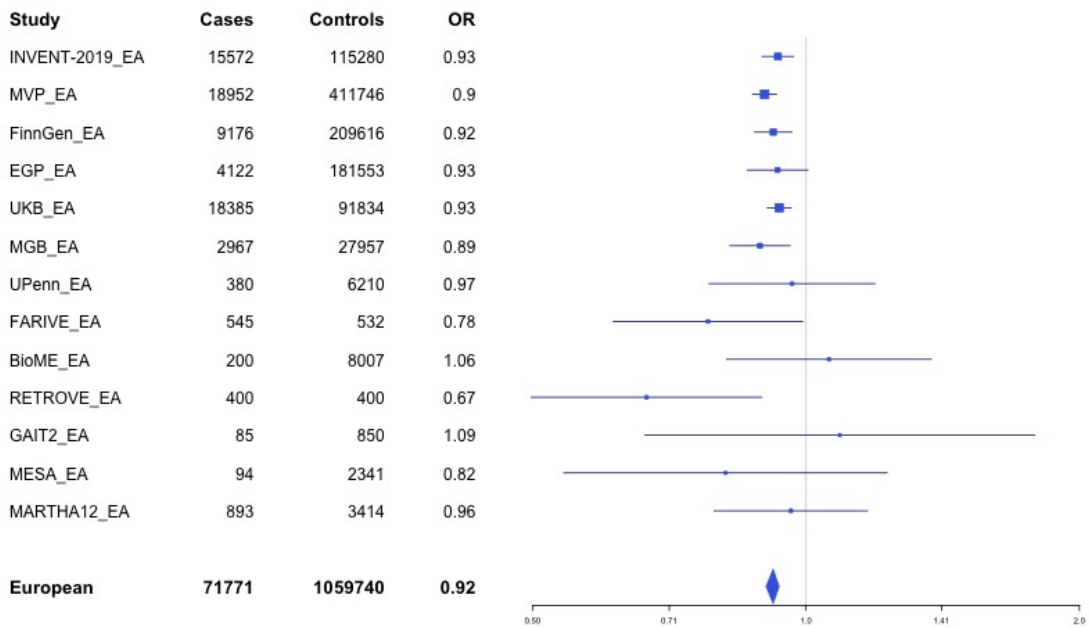



Supplementary Figure 3.93 – rs117390891 (chr20:23168526) in locus 126 (LINC00656;NXT1)

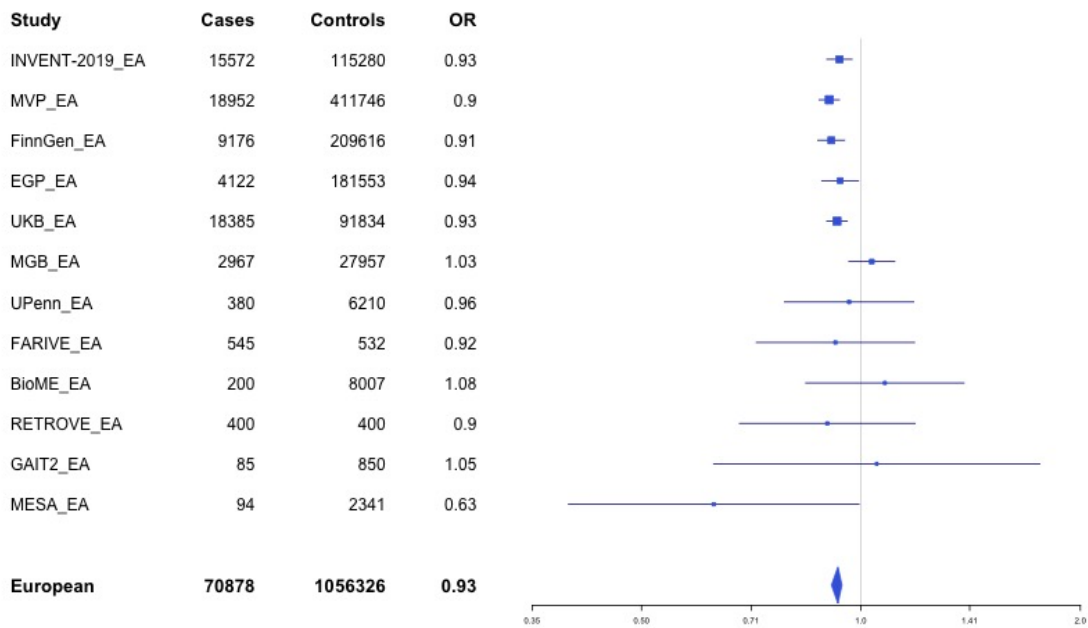

Supplementary Figure 3.94 – rs6087685 (chr20:33777612) in locus 127 (MMP24-AS1-EDEM2)

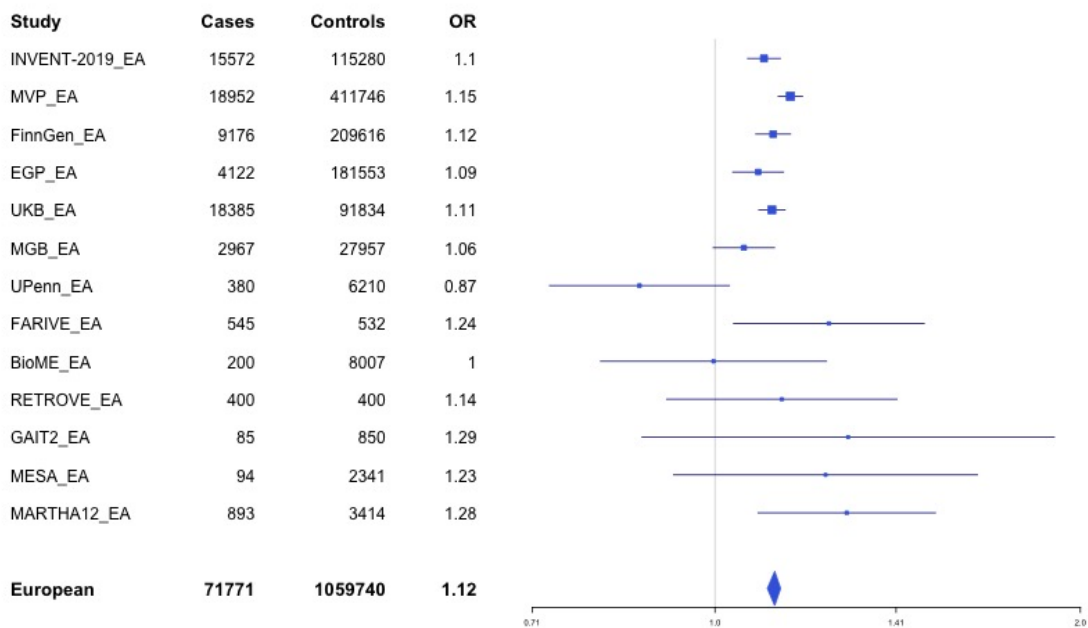

Supplementary Figure 3.95 – rs3070580 (chr22:33165231) in locus 129 (SYN3)

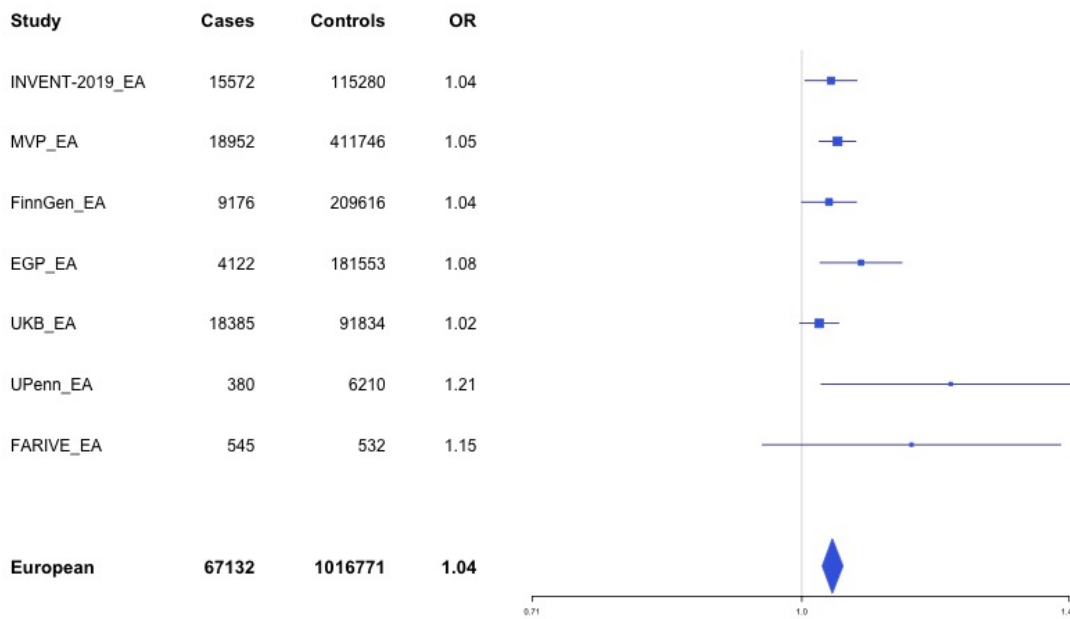

Supplementary Figure 3.96 – rs9611844 (chr22:43115776) in locus 130 (A4GALT)

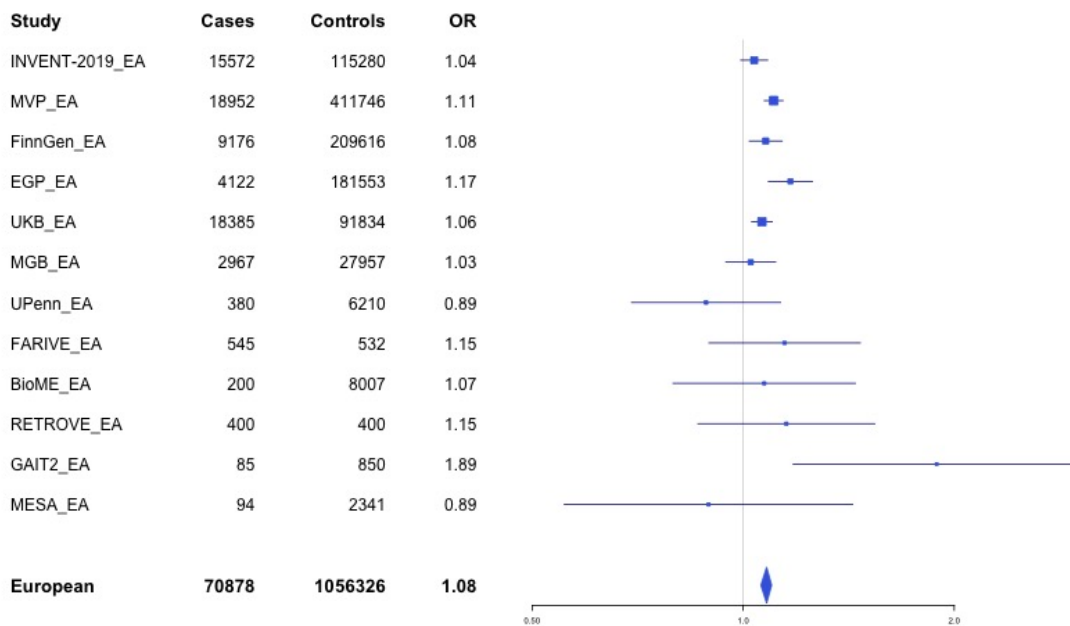

Supplementary Figure 3.97 – rs12388118 (chr23:11380742) in locus 131 (ARHGAP6)

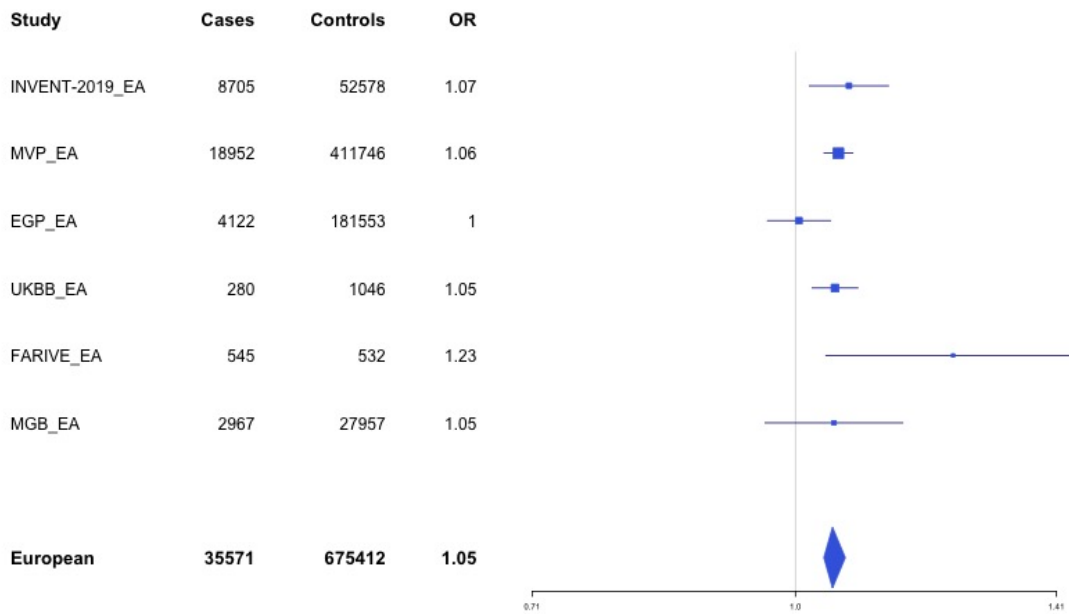

Supplementary Figure 3.98 – rs3002416 (chr23:39710195) in locus 133 (MIR1587;BCOR)

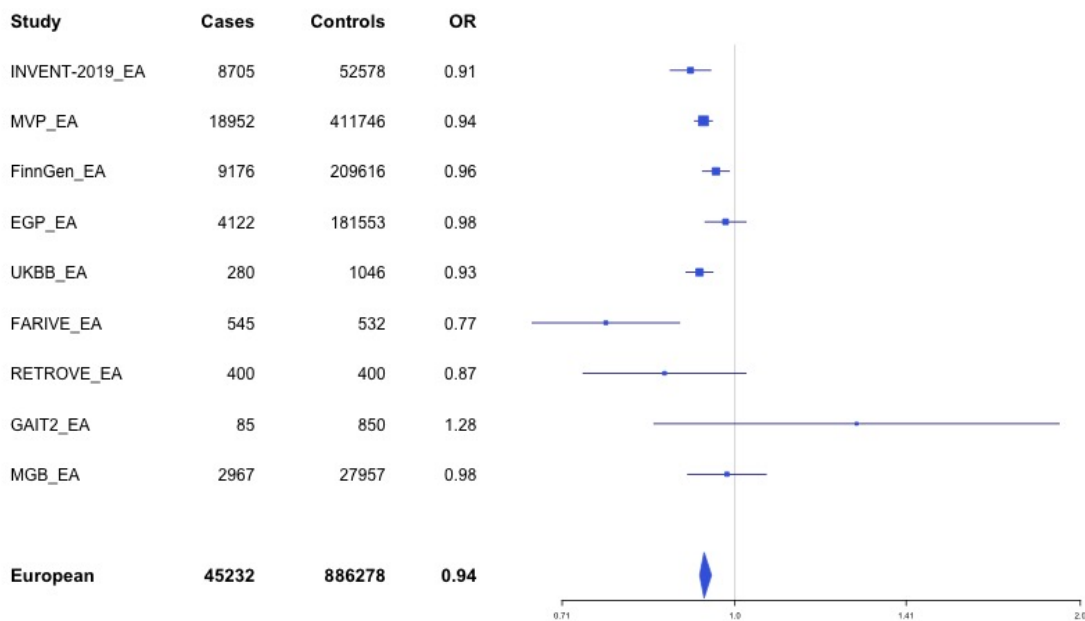

Supplementary Figure 3.99 – rs6048 (chr23:138633280) in locus 134 (F9)

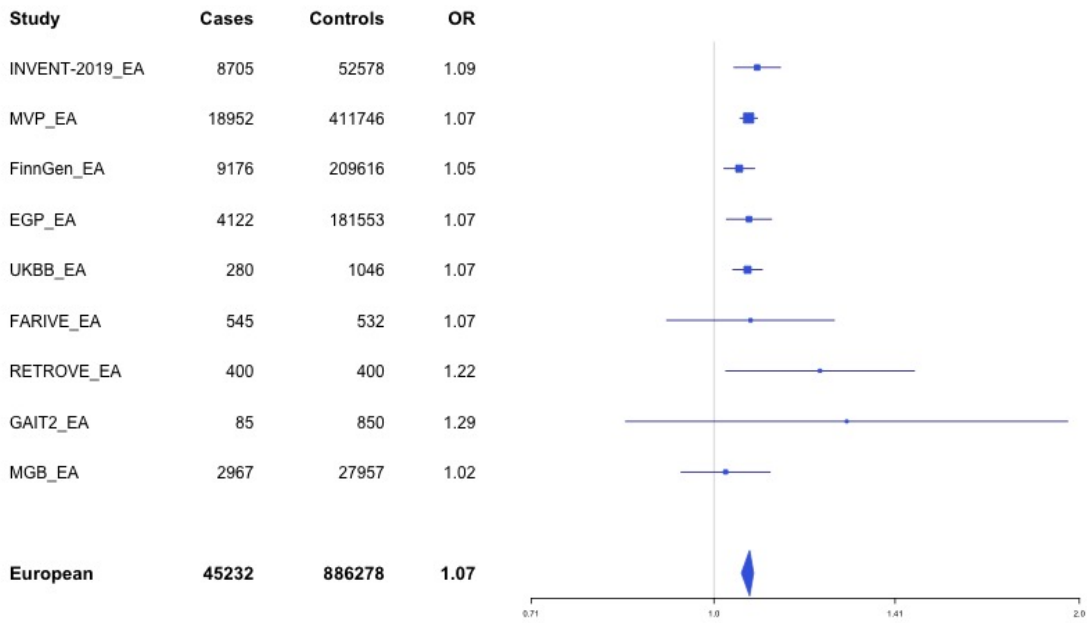

Supplementary Figure 3.100 – rs4898406 (chr23:154273269) in locus 135 (FUNDC2)

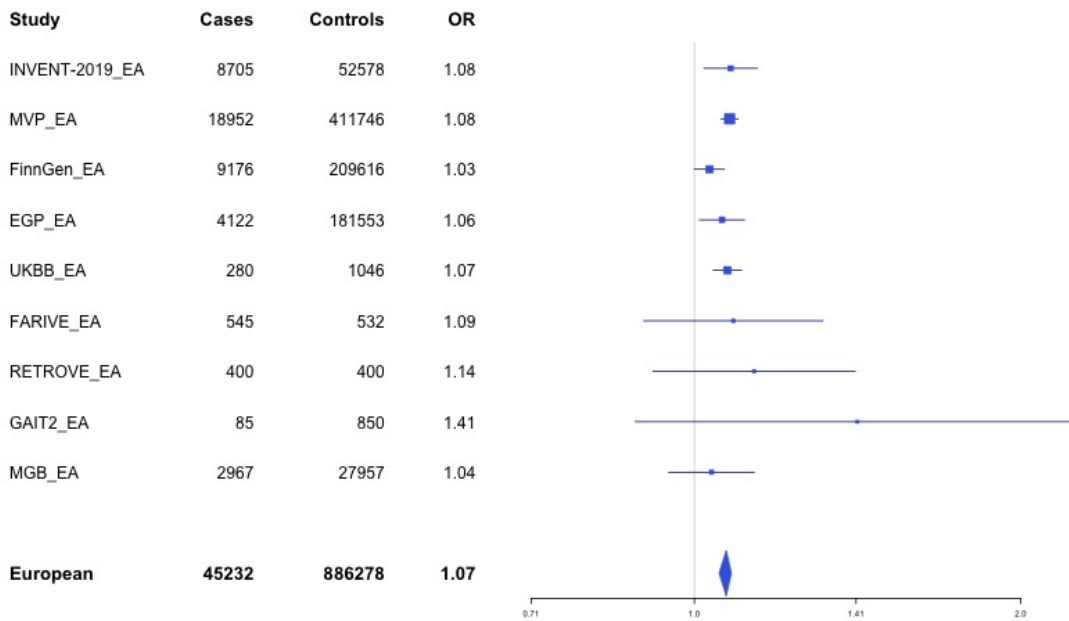

Supplement: Supplementary file [file media-3.pdf]
