# Supplementary material for: Cross-Ancestry Investigation of Venous Thromboembolism Genomic Predictors
Source: bioRxiv or medRxiv preprint supplement (doi:10.1101/2022.03.04.22271003), 2022-03-08

**Supplementary Figure 6.****Regional association plots of Combined analysis lead variants.**

|      |                                                                |    |
|------|----------------------------------------------------------------|----|
| 6.1  | rs12121476 (chr1:9335327) in locus 1 (H6PD;SPSB1)              | 4  |
| 6.2  | rs551176418 (chr1:27107263) in locus 2 (ARID1A)                | 5  |
| 6.3  | rs6695572 (chr1:77945635) in locus 3 (AK5)                     | 6  |
| 6.4  | rs3832016 (chr1:109818158) in locus 4 (CELSR2)                 | 7  |
| 6.5  | rs3767812 (chr1:118155620) in locus 5 (TENT5C)                 | 8  |
| 6.6  | rs1267881263 (chr1:150496127) in locus 6 (FALEC;ADAMTSL4)      | 9  |
| 6.7  | rs905938 (chr1:154991389) in locus 7 (DCST2)                   | 10 |
| 6.8  | rs3557 (chr1:161188893) in locus 8 (FCER1G)                    | 11 |
| 6.9  | rs6025 (chr1:169519049) in locus 9 (F5)                        | 12 |
| 6.10 | rs6695940 (chr1:173882980) in locus 10 (SERPINC1)              | 13 |
| 6.11 | rs143410348 (chr1:196809316) in locus 12 (CFHR1;CFHR4)         | 14 |
| 6.12 | rs2842700 (chr1:207282149) in locus 13 (C4BPA)                 | 15 |
| 6.13 | rs3811444 (chr1:248039451) in locus 14 (TRIM58)                | 16 |
| 6.14 | rs78475244 (chr2:65086804) in locus 16 (LINC01800)             | 17 |
| 6.15 | rs1867312 (chr2:68619981) in locus 17 (PLEK)                   | 18 |
| 6.16 | rs1518760 (chr2:128140500) in locus 18 (MAP3K2)                | 19 |
| 6.17 | rs1912849 (chr2:188310118) in locus 19 (CALCRL)                | 20 |
| 6.18 | rs78872368 (chr2:198545250) in locus 20 (RFTN2;MARS2)          | 21 |
| 6.19 | rs715 (chr2:211543055) in locus 21 (CPS1)                      | 22 |
| 6.20 | rs68066031 (chr2:224880498) in locus 22 (SERPINE2)             | 23 |
| 6.21 | rs13084580 (chr3:39188182) in locus 24 (CSRNP1)                | 24 |
| 6.22 | rs11130326 (chr3:52771920) in locus 25 (NEK4)                  | 25 |
| 6.23 | rs529326506 (chr3:90503764) in locus 26 (EPHA3;NONE)           | 26 |
| 6.24 | rs28479320 (chr3:93752529) in locus 27 (ARL13B)                | 27 |
| 6.25 | rs900399 (chr3:156798732) in locus 30 (LINC02029;LINC00880)    | 28 |
| 6.26 | rs710446 (chr3:186459927) in locus 32 (KNG1)                   | 29 |
| 6.27 | rs3796159 (chr3:194790434) in locus 33 (XXYLT1)                | 30 |
| 6.28 | rs9654093 (chr4:7903763) in locus 34 (AFAP1)                   | 31 |
| 6.29 | rs781656 (chr4:57778645) in locus 35 (REST)                    | 32 |
| 6.30 | rs6826579 (chr4:83785031) in locus 36 (SEC31A)                 | 33 |
| 6.31 | rs2014912 (chr4:86715670) in locus 37 (ARHGAP24)               | 34 |
| 6.32 | rs2066864 (chr4:155525695) in locus 39 (FGG)                   | 35 |
| 6.33 | rs3756011 (chr4:187206249) in locus 40 (F11)                   | 36 |
| 6.34 | rs16867574 (chr5:38708554) in locus 42 (OSMR-AS1)              | 37 |
| 6.35 | rs7730244 (chr5:72957088) in locus 43 (ARHGGEF28)              | 38 |
| 6.36 | rs750465397 (chr5:96289036) in locus 44 (LNPEP)                | 39 |
| 6.37 | rs147133967 (chr5:132426851) in locus 45 (HSPA4)               | 40 |
| 6.38 | rs214059 (chr6:25536937) in locus 46 (CARMIL1)                 | 41 |
| 6.39 | rs2394251 (chr6:29943688) in locus 47 (HCG9)                   | 42 |
| 6.40 | rs9268863 (chr6:32430289) in locus 48 (HLA-DRA;HLA-DRB5)       | 43 |
| 6.41 | rs145294670 (chr6:34622561) in locus 49 (ILRUN)                | 44 |
| 6.42 | rs9386182 (chr6:147691069) in locus 52 (STXBP5)                | 45 |
| 6.43 | rs1513275 (chr7:28259233) in locus 53 (JAZF1-AS1)              | 46 |
| 6.44 | rs42038 (chr7:92243719) in locus 54 (CDK6)                     | 47 |
| 6.45 | rs10099512 (chr8:9178821) in locus 57 (LOC101929128;LOC157273) | 48 |
| 6.46 | rs2048528 (chr8:23373680) in locus 59 (ENTPD4;SLC25A37)        | 49 |
| 6.47 | rs2685412 (chr8:27810603) in locus 60 (SCARA5)                 | 50 |
| 6.48 | rs2915595 (chr8:30402817) in locus 61 (RBPMS)                  | 51 |
| 6.49 | rs6993770 (chr8:106581528) in locus 62 (ZFPM2)                 | 52 |
| 6.50 | rs4236786 (chr8:108291878) in locus 63 (ANGPT1)                | 53 |

|       |                                                                  |     |
|-------|------------------------------------------------------------------|-----|
| 6.51  | rs10820606 (chr9:99192919) in locus 65 (ZNF367;HABP4)            | 54  |
| 6.52  | rs505922 (chr9:136149229) in locus 66 (ABO)                      | 55  |
| 6.53  | rs1243187 (chr10:21907016) in locus 68 (MLLT10)                  | 56  |
| 6.54  | rs4272700 (chr10:27881308) in locus 69 (RAB18;MKX)               | 57  |
| 6.55  | rs17490626 (chr10:71218646) in locus 72 (TSPAN15)                | 58  |
| 6.56  | rs16937003 (chr10:80938499) in locus 73 (ZMIZ1)                  | 59  |
| 6.57  | rs57866767 (chr10:96023077) in locus 74 (PLCE1)                  | 60  |
| 6.58  | rs10886430 (chr10:121010256) in locus 75 (GRK5)                  | 61  |
| 6.59  | rs2030291 (chr11:16251251) in locus 77 (SOX6)                    | 62  |
| 6.60  | rs11032074 (chr11:32993887) in locus 78 (QSER1)                  | 63  |
| 6.61  | rs1799963 (chr11:46761055) in locus 79 (F2)                      | 64  |
| 6.62  | rs141798115 (chr11:56875074) in locus 80 (OR5AK4P;LRRC55)        | 65  |
| 6.63  | rs4354705 (chr11:60088159) in locus 81 (MS4A4A;MS4A6E)           | 66  |
| 6.64  | rs174551 (chr11:61573684) in locus 82 (FADS1)                    | 67  |
| 6.65  | rs2846027 (chr11:114003415) in locus 84 (ZBTB16)                 | 68  |
| 6.66  | rs35257264 (chr11:126296816) in locus 85 (ST3GAL4)               | 69  |
| 6.67  | rs7107568 (chr11:130779668) in locus 86 (SNX19)                  | 70  |
| 6.68  | rs1558519 (chr12:6153738) in locus 87 (VWF)                      | 71  |
| 6.69  | rs7311483 (chr12:9053661) in locus 88 (A2ML1;PHC1)               | 72  |
| 6.70  | rs6580981 (chr12:54723028) in locus 89 (COPZ1)                   | 73  |
| 6.71  | rs142351376 (chr12:104136288) in locus 90 (STAB2)                | 74  |
| 6.72  | rs3184504 (chr12:111884608) in locus 91 (SH2B3)                  | 75  |
| 6.73  | rs2851435 (chr12:123712416) in locus 92 (MPHOSPH9)               | 76  |
| 6.74  | rs3211752 (chr13:113787459) in locus 94 (F10)                    | 77  |
| 6.75  | rs11158204 (chr14:58844526) in locus 95 (ARID4A;TOMM20L)         | 78  |
| 6.76  | rs2127869 (chr14:65794352) in locus 96 (LINC02324;MIR4708)       | 79  |
| 6.77  | rs7152641 (chr14:92213967) in locus 97 (CATSPERB;TC2N)           | 80  |
| 6.78  | rs28929474 (chr14:94844947) in locus 98 (SERPINA1)               | 81  |
| 6.79  | rs28519971 (chr14:103089808) in locus 99 (RCOR1)                 | 82  |
| 6.80  | rs1247656151 (chr15:43677975) in locus 100 (TUBGCP4)             | 83  |
| 6.81  | rs7183672 (chr15:96101018) in locus 103 (LINC00924;LOC105369212) | 84  |
| 6.82  | rs71376077 (chr16:15738114) in locus 105 (NDE1)                  | 85  |
| 6.83  | rs12443808 (chr16:30996871) in locus 106 (HSD3B7)                | 86  |
| 6.84  | rs7197453 (chr16:72079127) in locus 107 (DHODH;HP)               | 87  |
| 6.85  | rs77246010 (chr16:75429853) in locus 108 (CFDP1)                 | 88  |
| 6.86  | rs12445050 (chr16:81870969) in locus 109 (PLCG2)                 | 89  |
| 6.87  | rs8049403 (chr16:85778651) in locus 110 (C16orf74)               | 90  |
| 6.88  | rs28634651 (chr16:88553198) in locus 111 (ZFPM1)                 | 91  |
| 6.89  | rs6503222 (chr17:1977862) in locus 112 (SMG6)                    | 92  |
| 6.90  | rs434473 (chr17:6904934) in locus 113 (ALOX12)                   | 93  |
| 6.91  | rs71138827 (chr17:27833678) in locus 114 (TAOK1)                 | 94  |
| 6.92  | rs62054822 (chr17:43927708) in locus 115 (MAPT-AS1)              | 95  |
| 6.93  | rs1801690 (chr17:64208285) in locus 116 (APOH)                   | 96  |
| 6.94  | rs573431210 (chr17:67276383) in locus 117 (ABCA5)                | 97  |
| 6.95  | rs59277920 (chr19:6077231) in locus 118 (RFX2)                   | 98  |
| 6.96  | rs8110055 (chr19:10739143) in locus 119 (SLC44A2)                | 99  |
| 6.97  | rs889139 (chr19:33889369) in locus 120 (PEPD)                    | 100 |
| 6.98  | rs2545774 (chr19:41287674) in locus 121 (RAB4B)                  | 101 |
| 6.99  | rs8108474 (chr19:46301479) in locus 122 (RSPH6A)                 | 102 |
| 6.100 | rs2638282 (chr19:49213833) in locus 123 (FUT2;MAMSTR)            | 103 |
| 6.101 | rs1654425 (chr19:55538980) in locus 124 (GP6)                    | 104 |
| 6.102 | rs2631628 (chr19:56645250) in locus 125 (ZNF787;ZNF444)          | 105 |
| 6.103 | rs117390891 (chr20:23168526) in locus 126 (LINC00656;NXT1)       | 106 |

|                                                                          |     |
|--------------------------------------------------------------------------|-----|
| 6.104rs6060288 (chr20:33772243) in locus 127 (MMP24-AS1-EDEM2) . . . . . | 107 |
| 6.105rs3070580 (chr22:33165231) in locus 129 (SYN3) . . . . .            | 108 |
| 6.106rs9611844 (chr22:43115776) in locus 130 (A4GALT) . . . . .          | 109 |
| 6.107rs12388118 (chr23:11380742) in locus 131 (ARHGAP6) . . . . .        | 110 |
| 6.108rs6632109 (chr23:34894638) in locus 132 (TMEM47;FAM47B) . . . . .   | 111 |
| 6.109rs3002416 (chr23:39710195) in locus 133 (MIR1587;BCOR) . . . . .    | 112 |
| 6.110rs6048 (chr23:138633280) in locus 134 (F9) . . . . .                | 113 |
| 6.111rs2084408 (chr23:154346709) in locus 135 (BRCC3) . . . . .          | 114 |

Supplementary Figure 6.1 – rs12121476 (chr1:9335327) in locus 1 (H6PD;SPSB1)

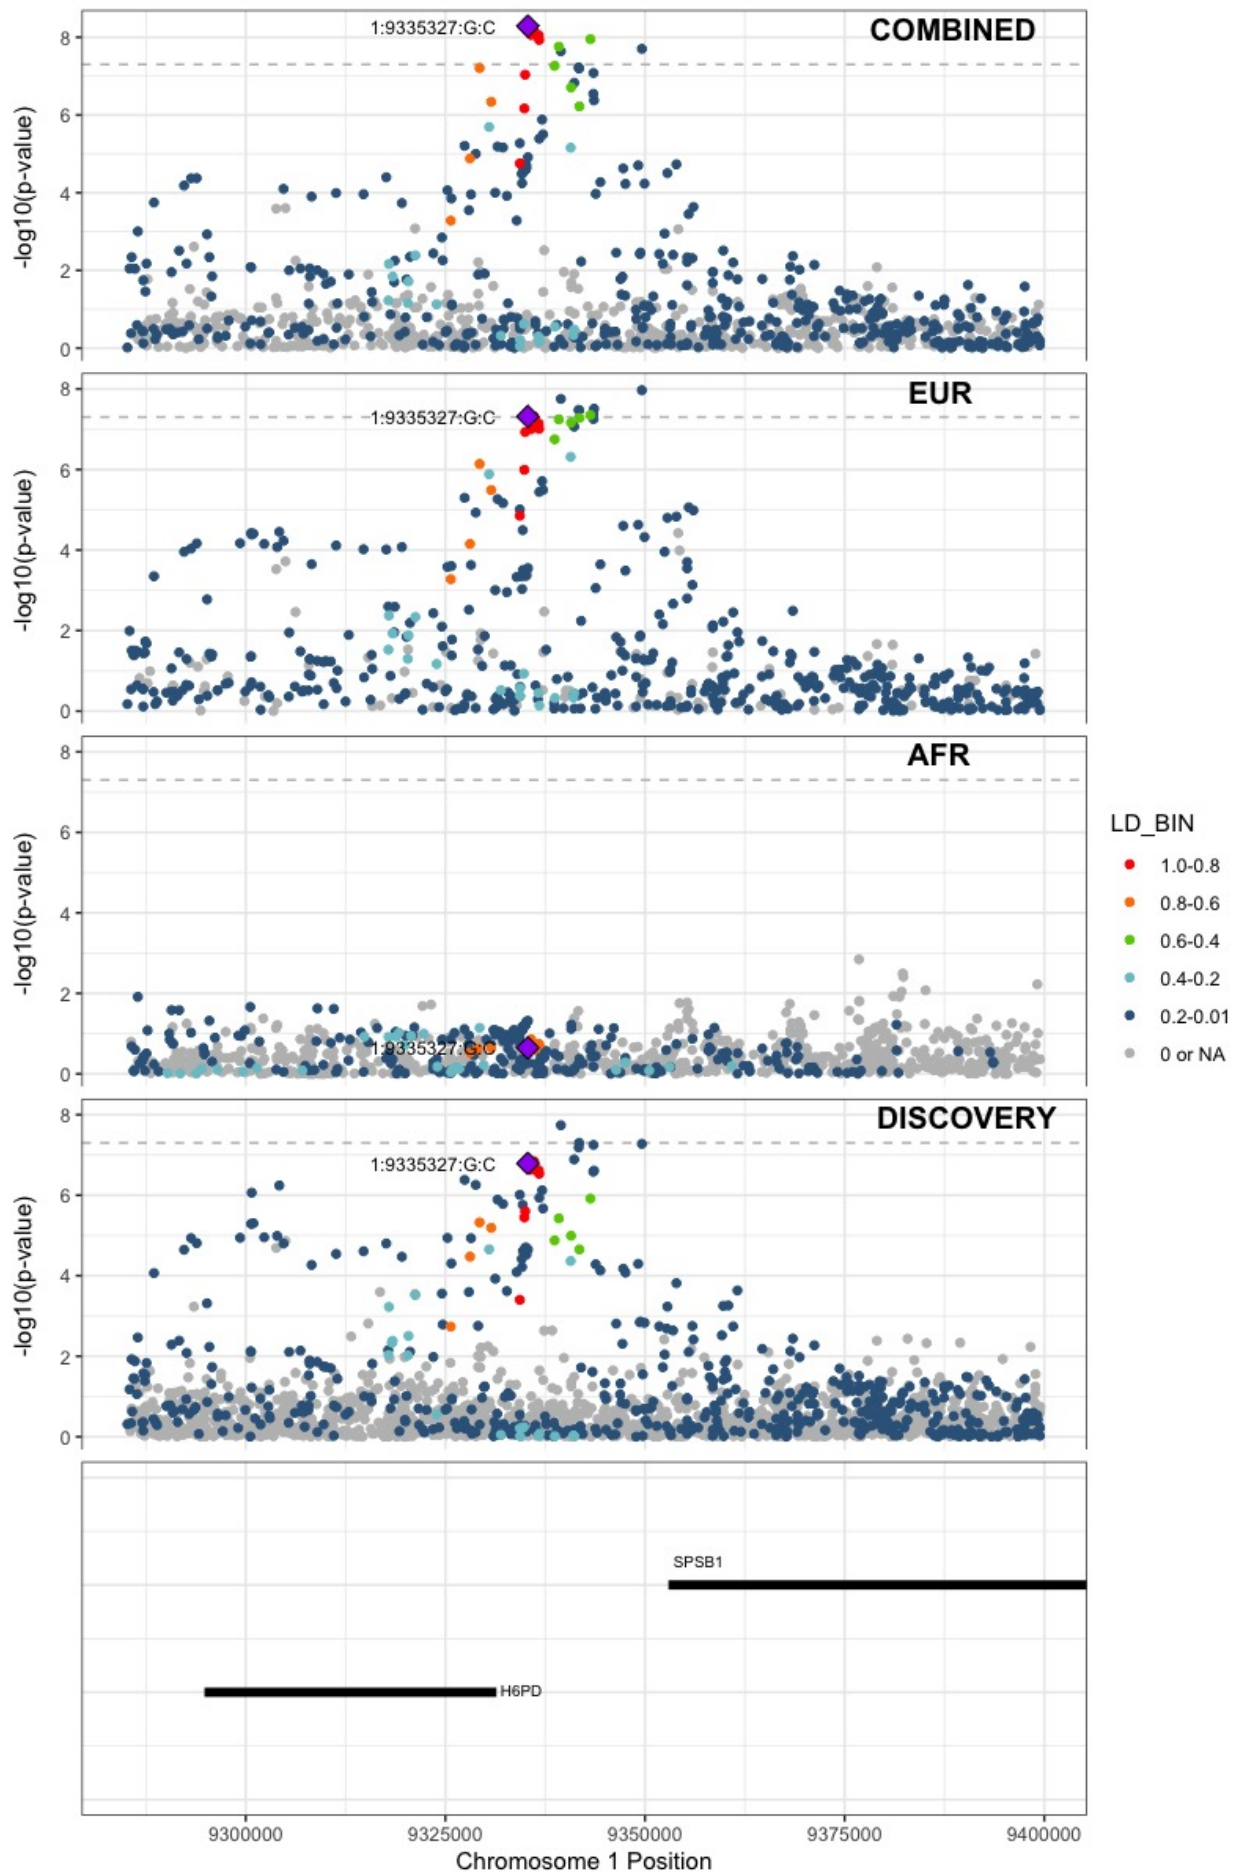

Supplementary Figure 6.2 – rs551176418 (chr1:27107263) in locus 2 (ARID1A)

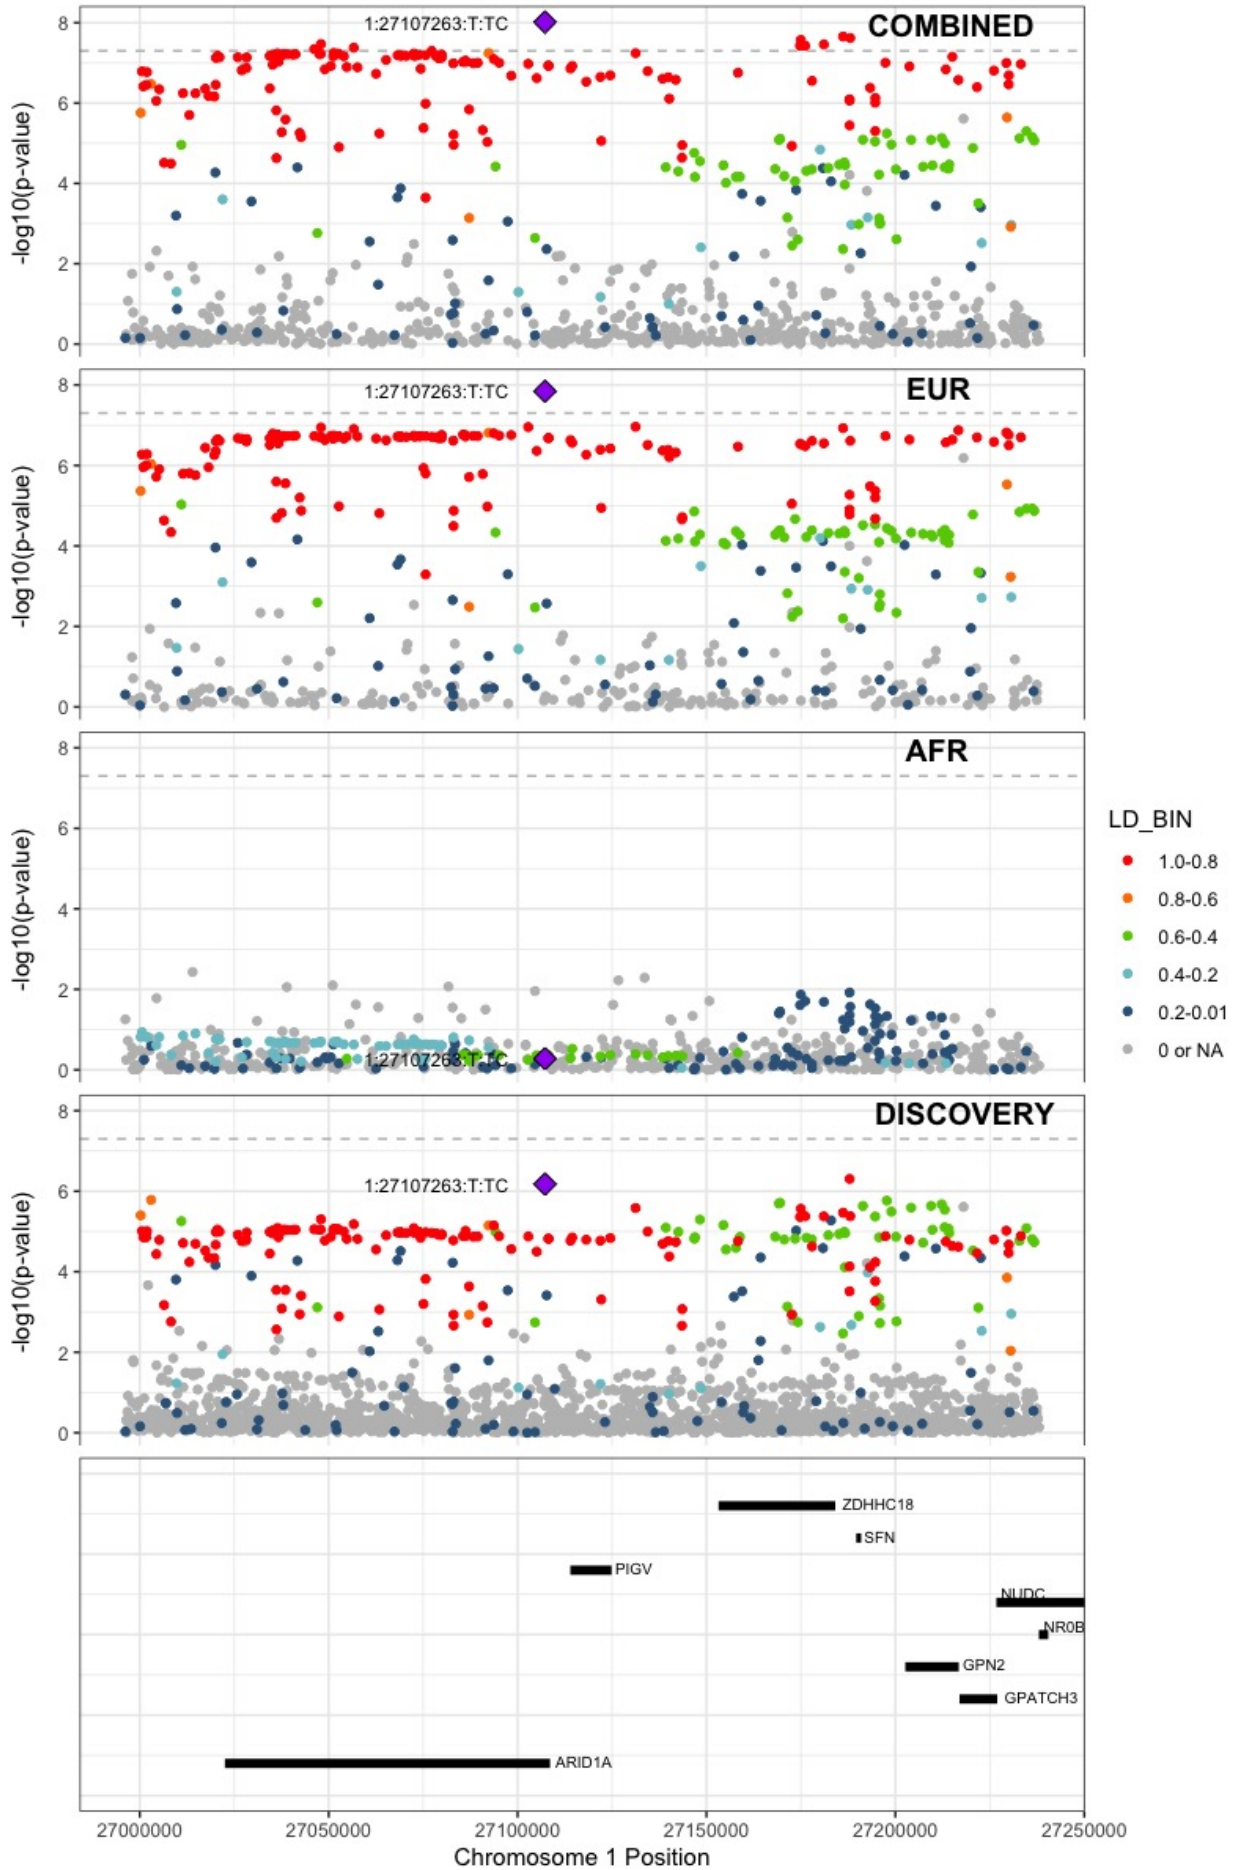

Supplementary Figure 6.3 – rs6695572 (chr1:77945635) in locus 3 (AK5)

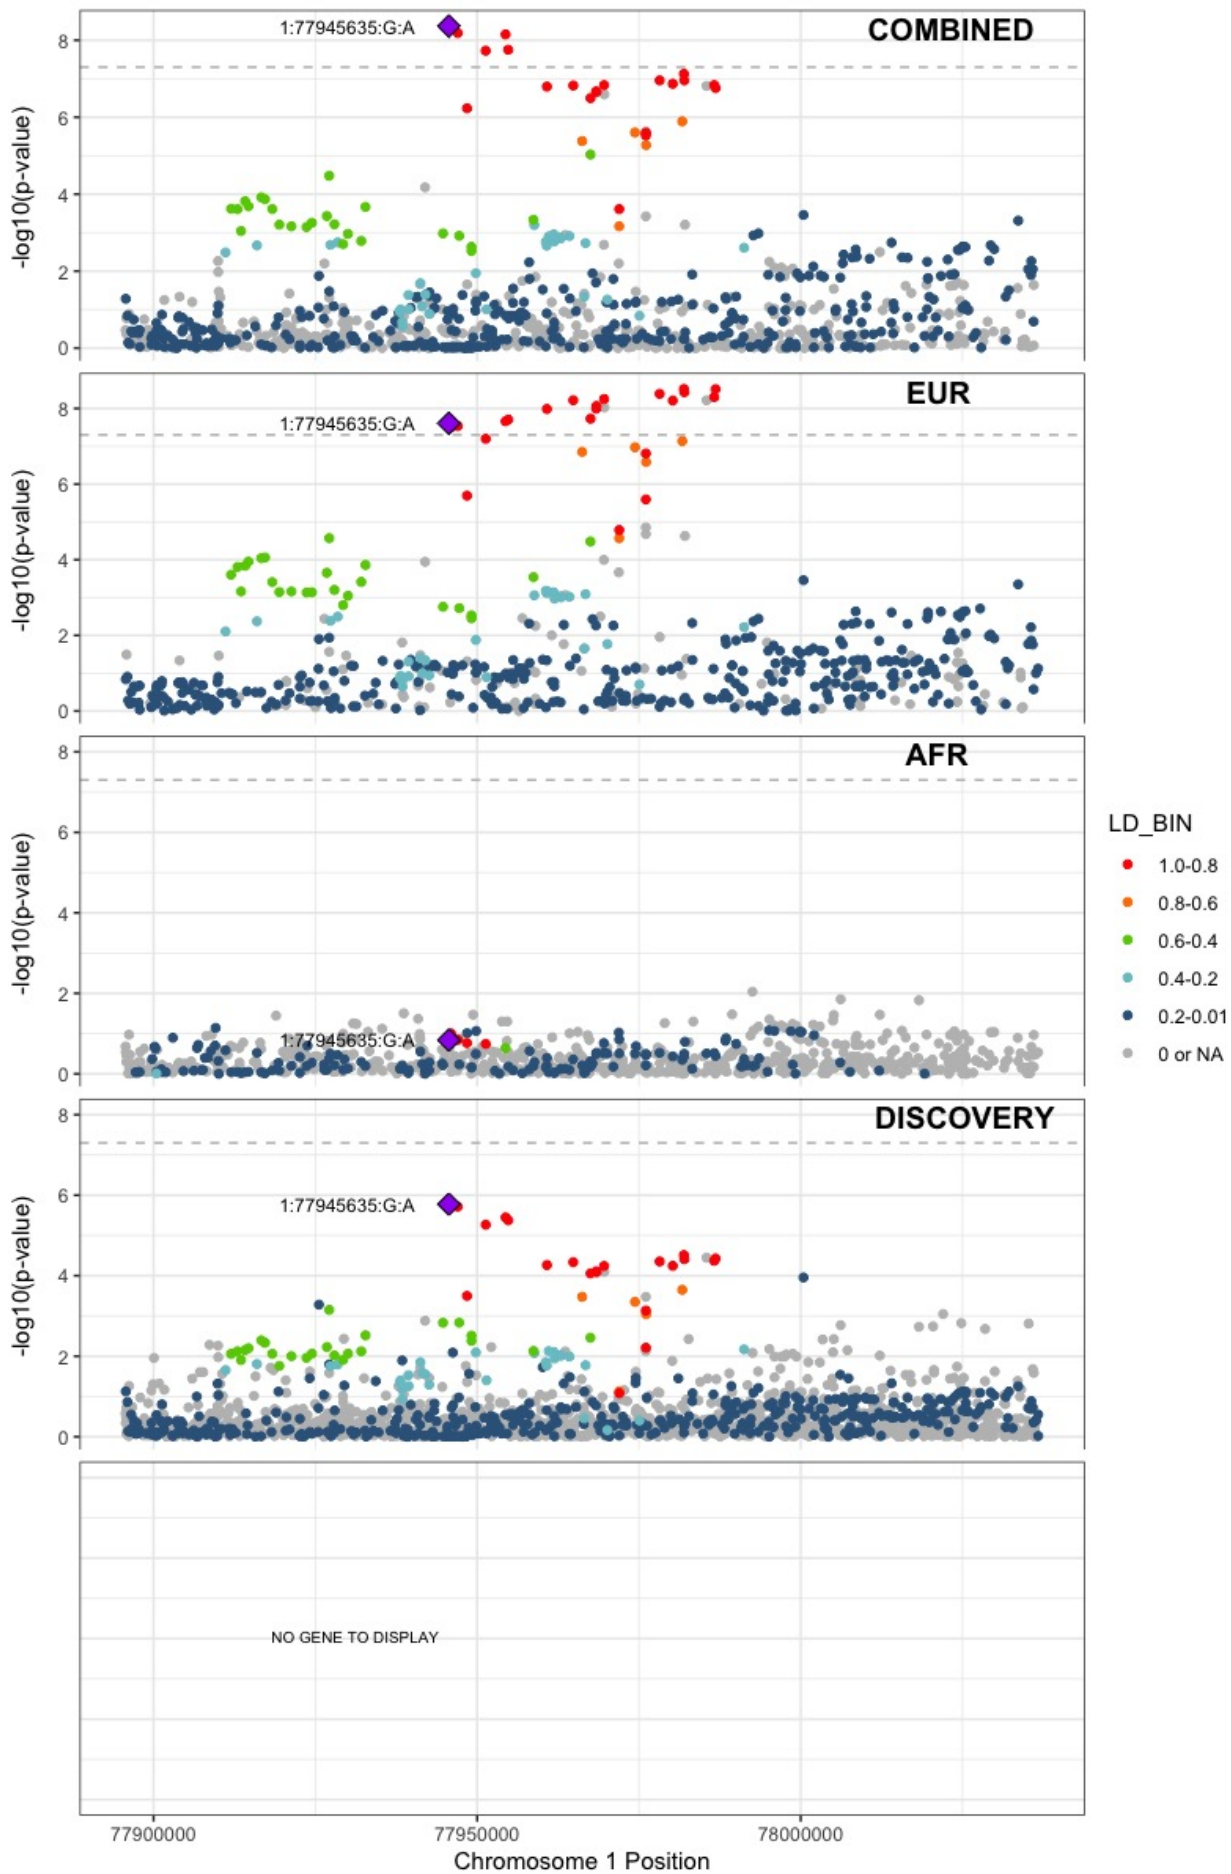

Supplementary Figure 6.4 – rs3832016 (chr1:109818158) in locus 4 (CELSR2)

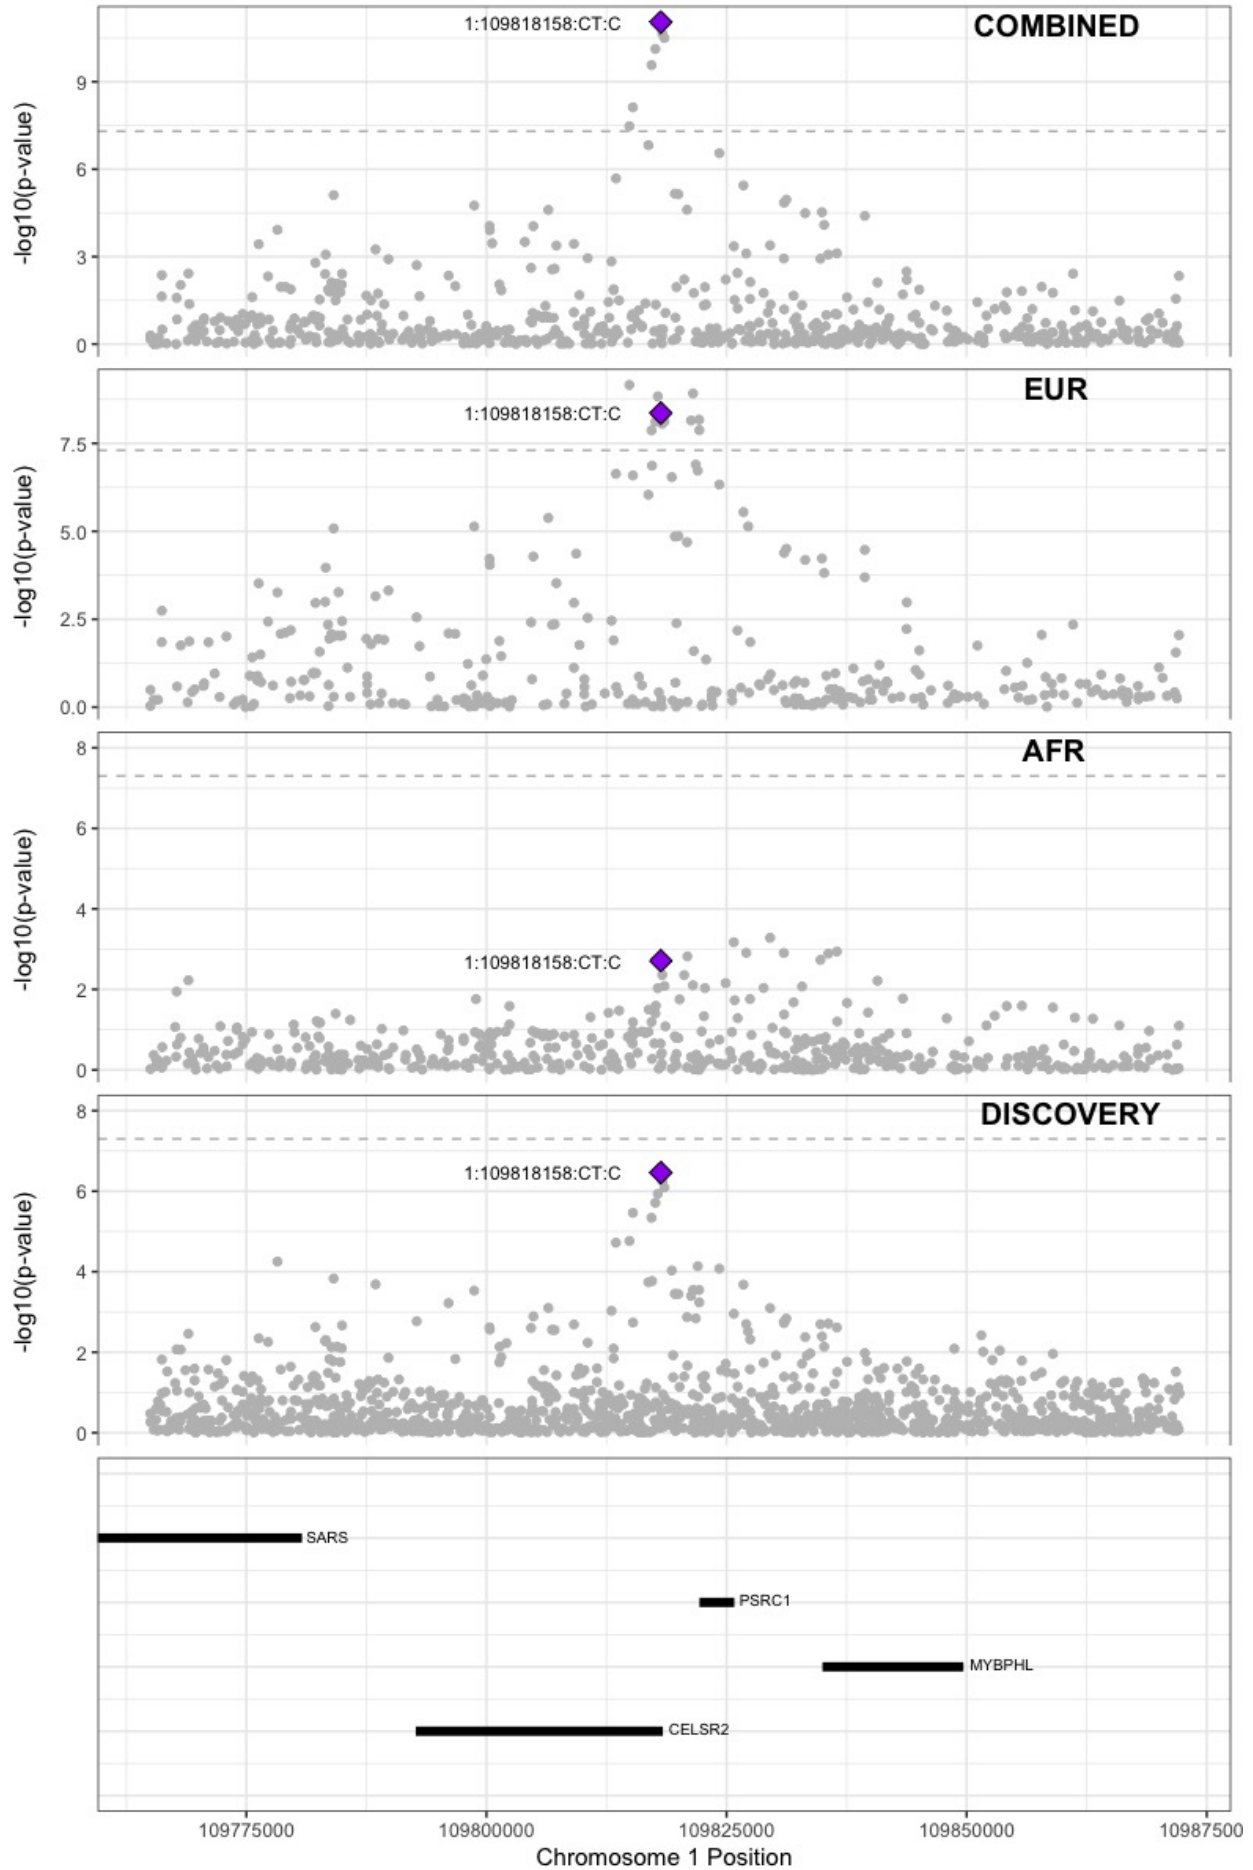

Supplementary Figure 6.5 – rs3767812 (chr1:118155620) in locus 5 (TENT5C)

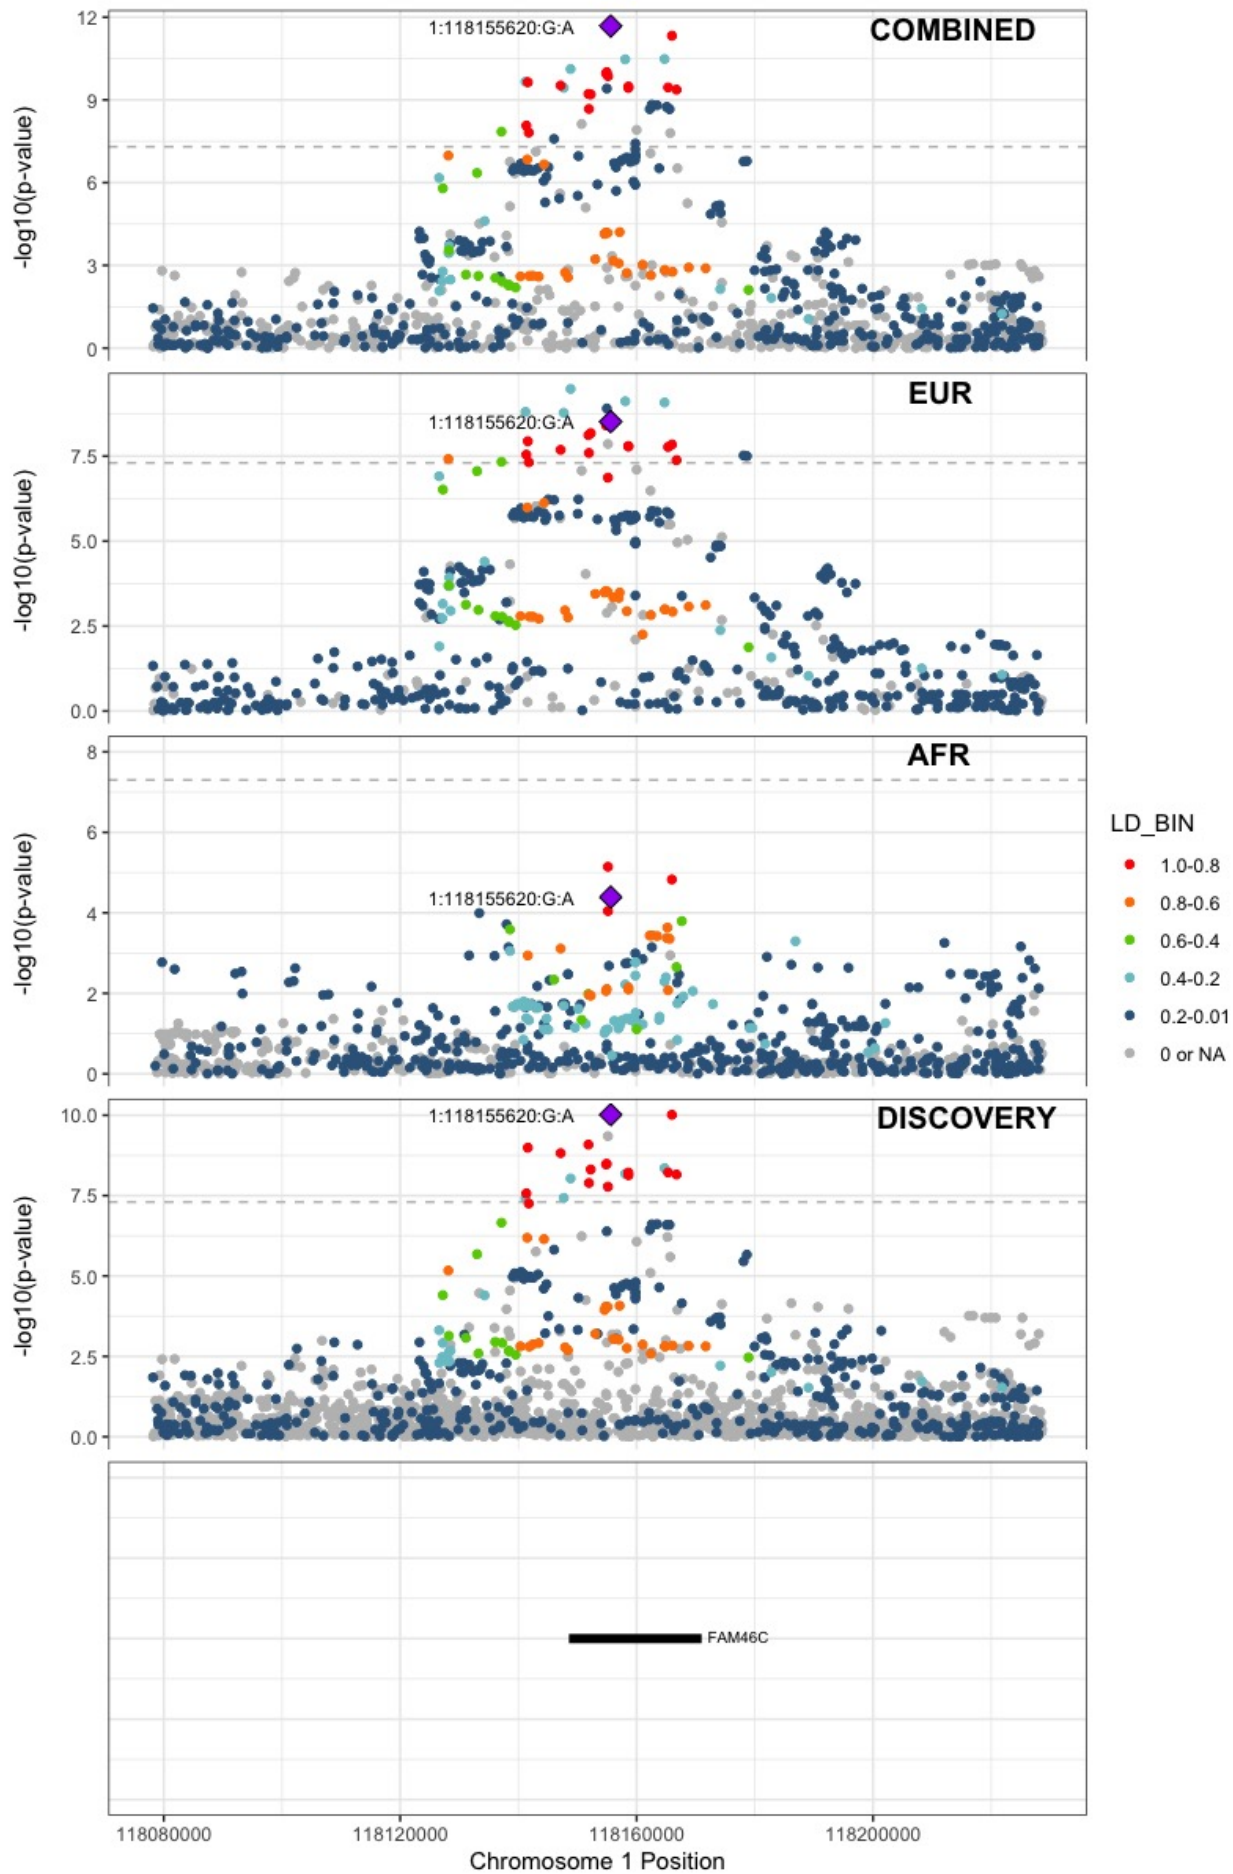



Supplementary Figure 6.6 – rs1267881263 (chr1:150496127) in locus 6 (FALEC;ADAMTSL4)

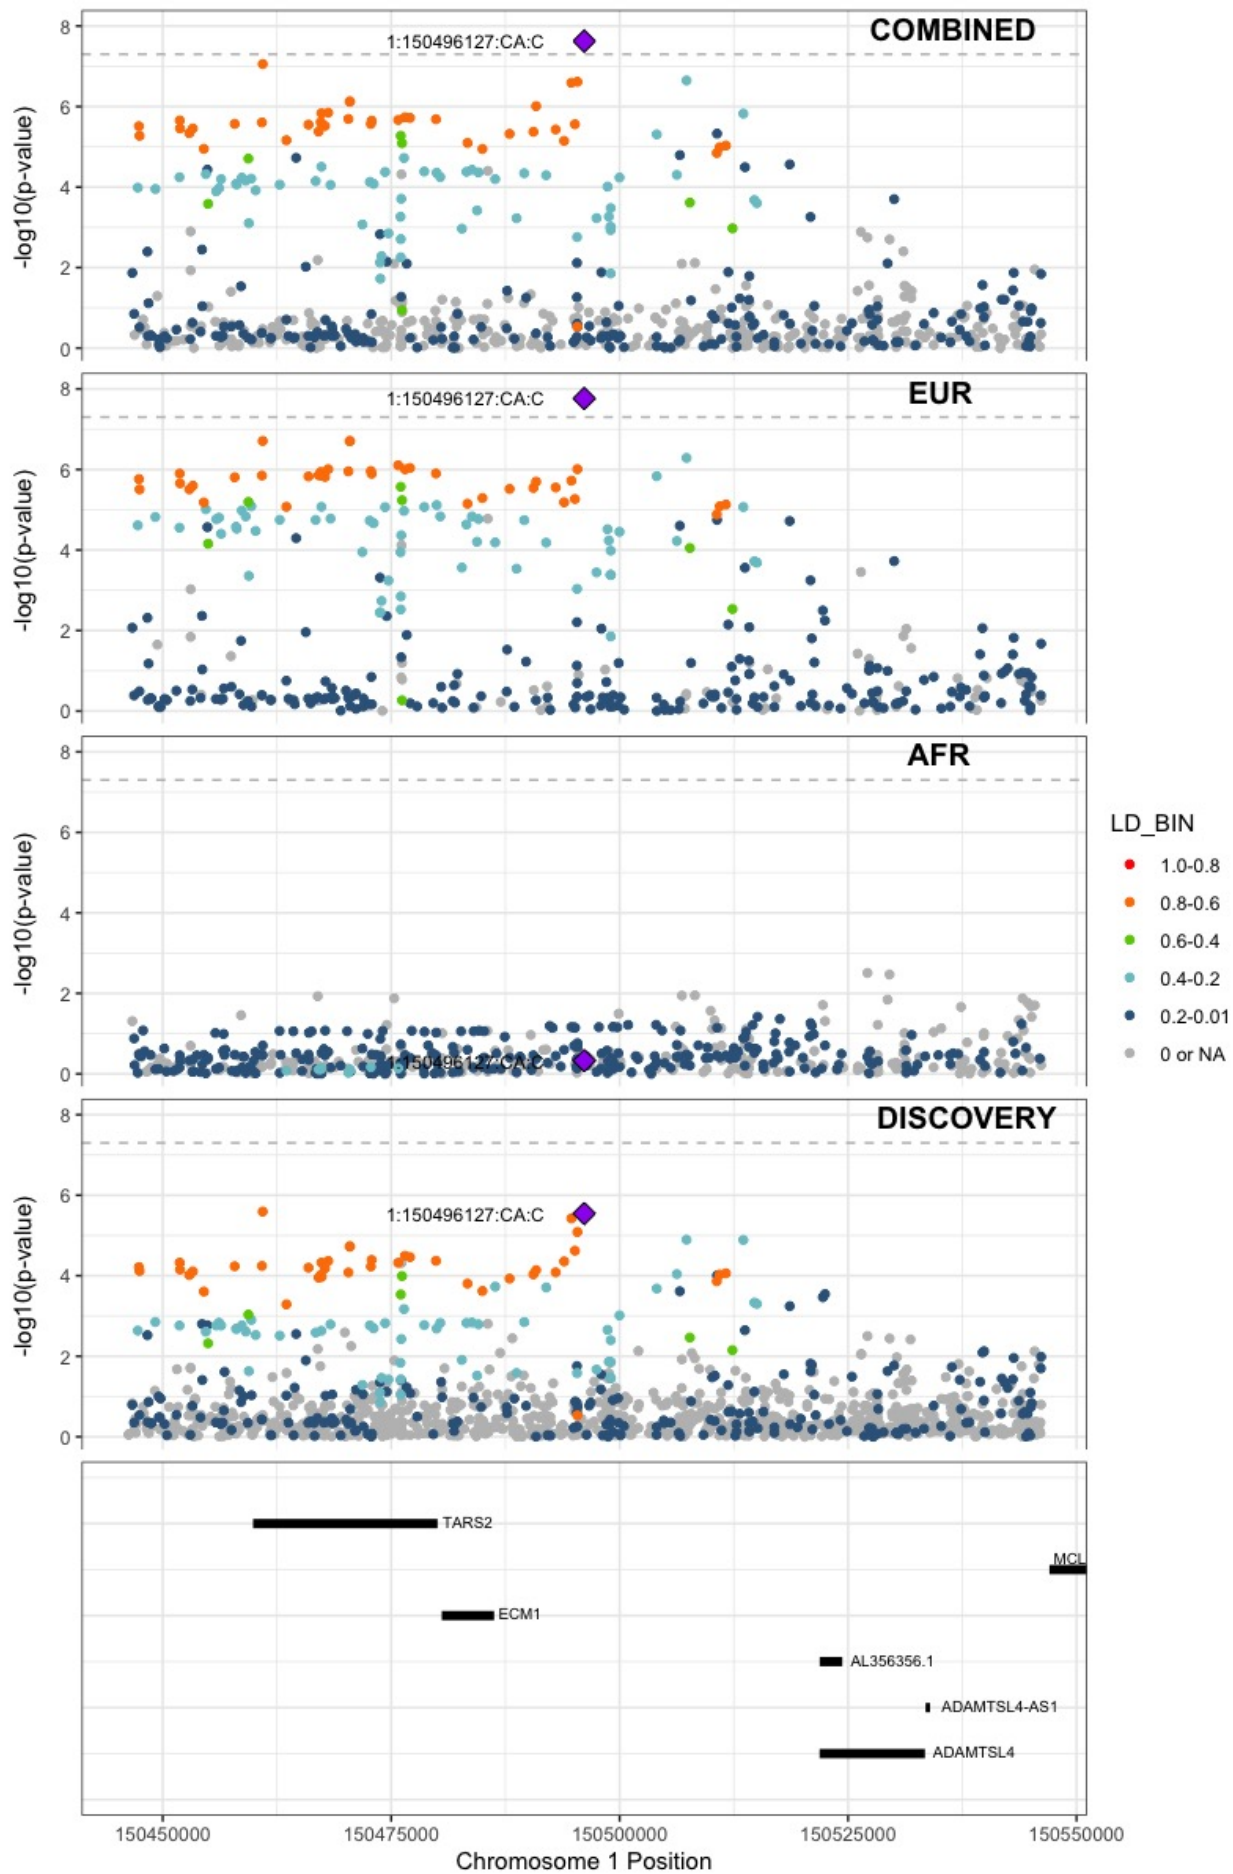

Supplementary Figure 6.7 – rs905938 (chr1:154991389) in locus 7 (DCST2)

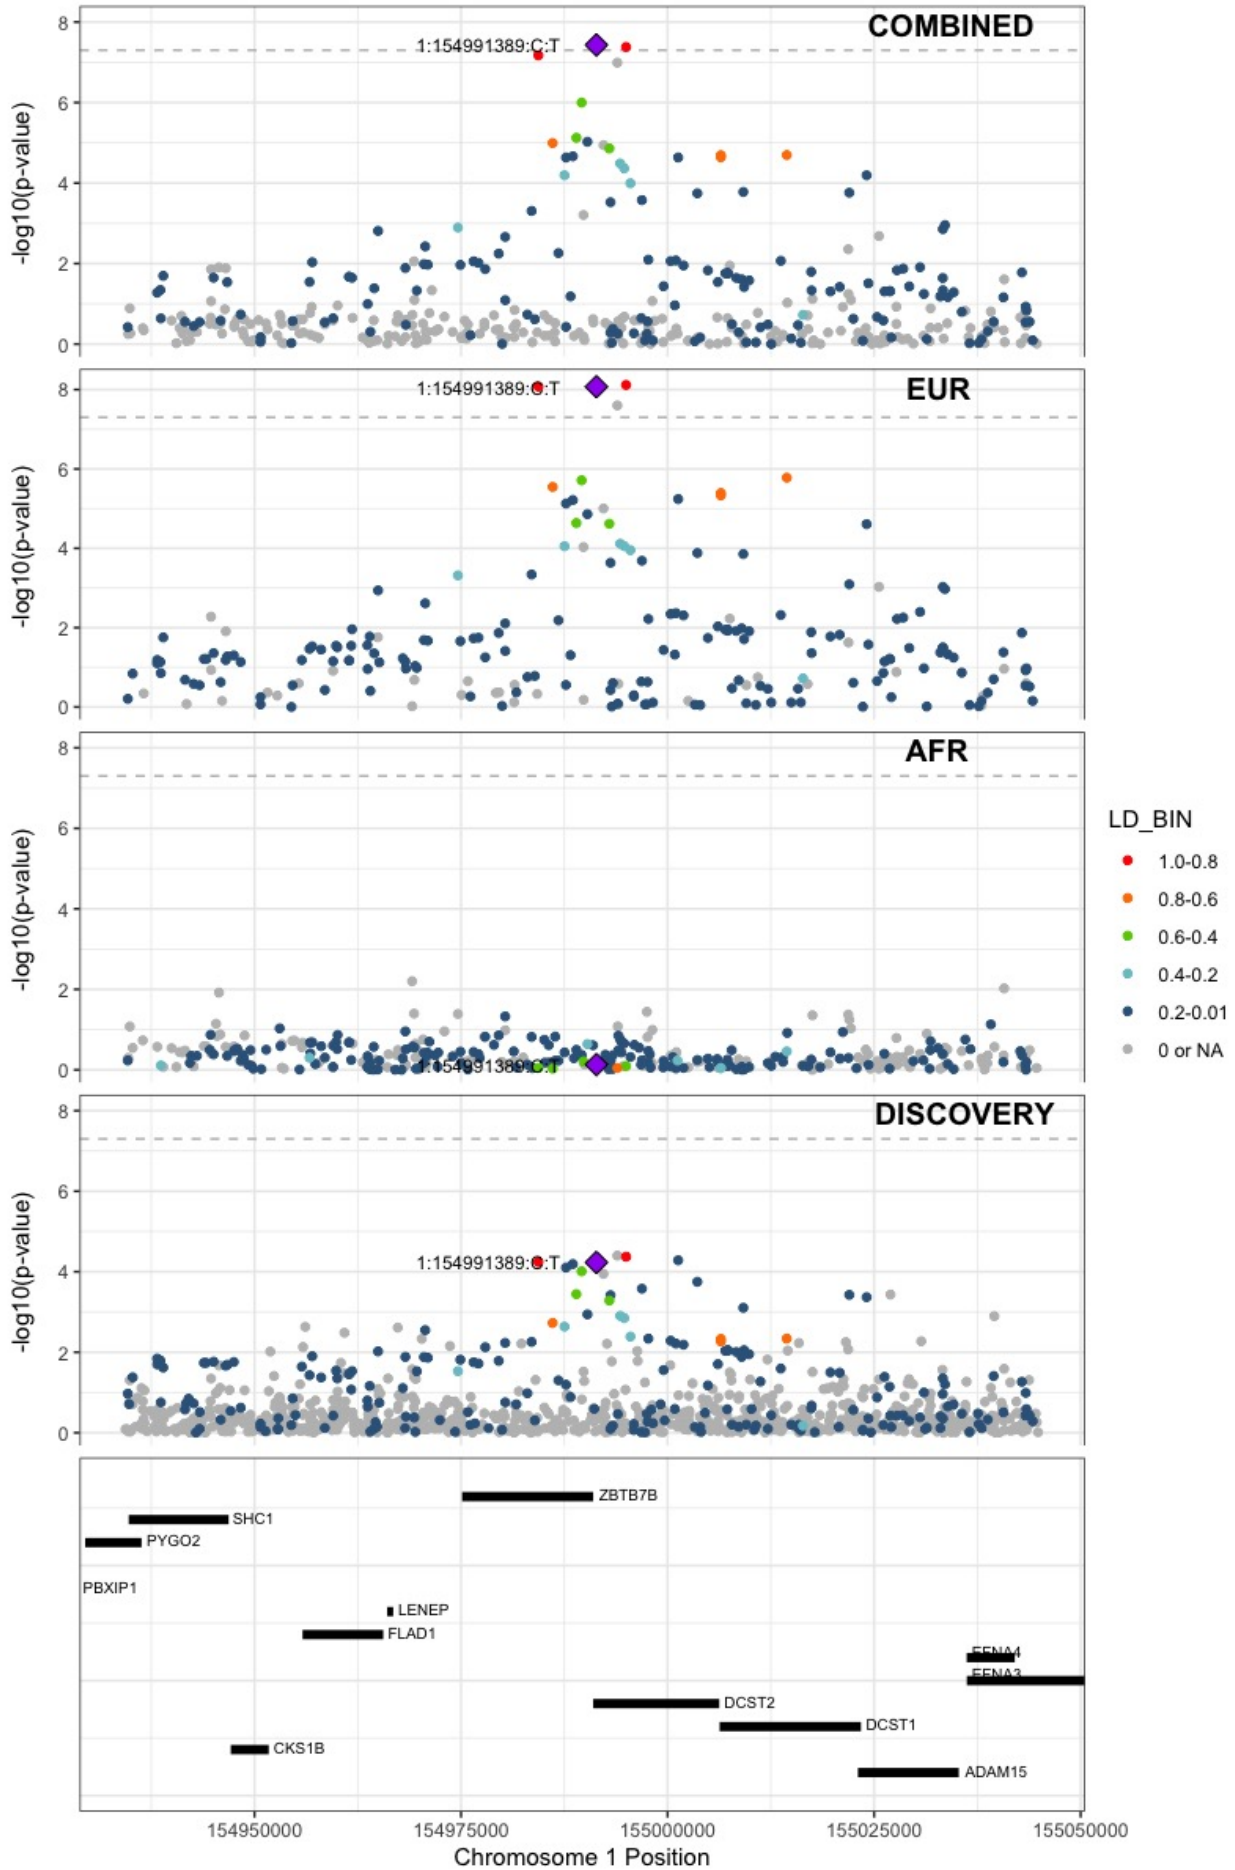

Supplementary Figure 6.8 – rs3557 (chr1:161188893) in locus 8 (FCER1G)

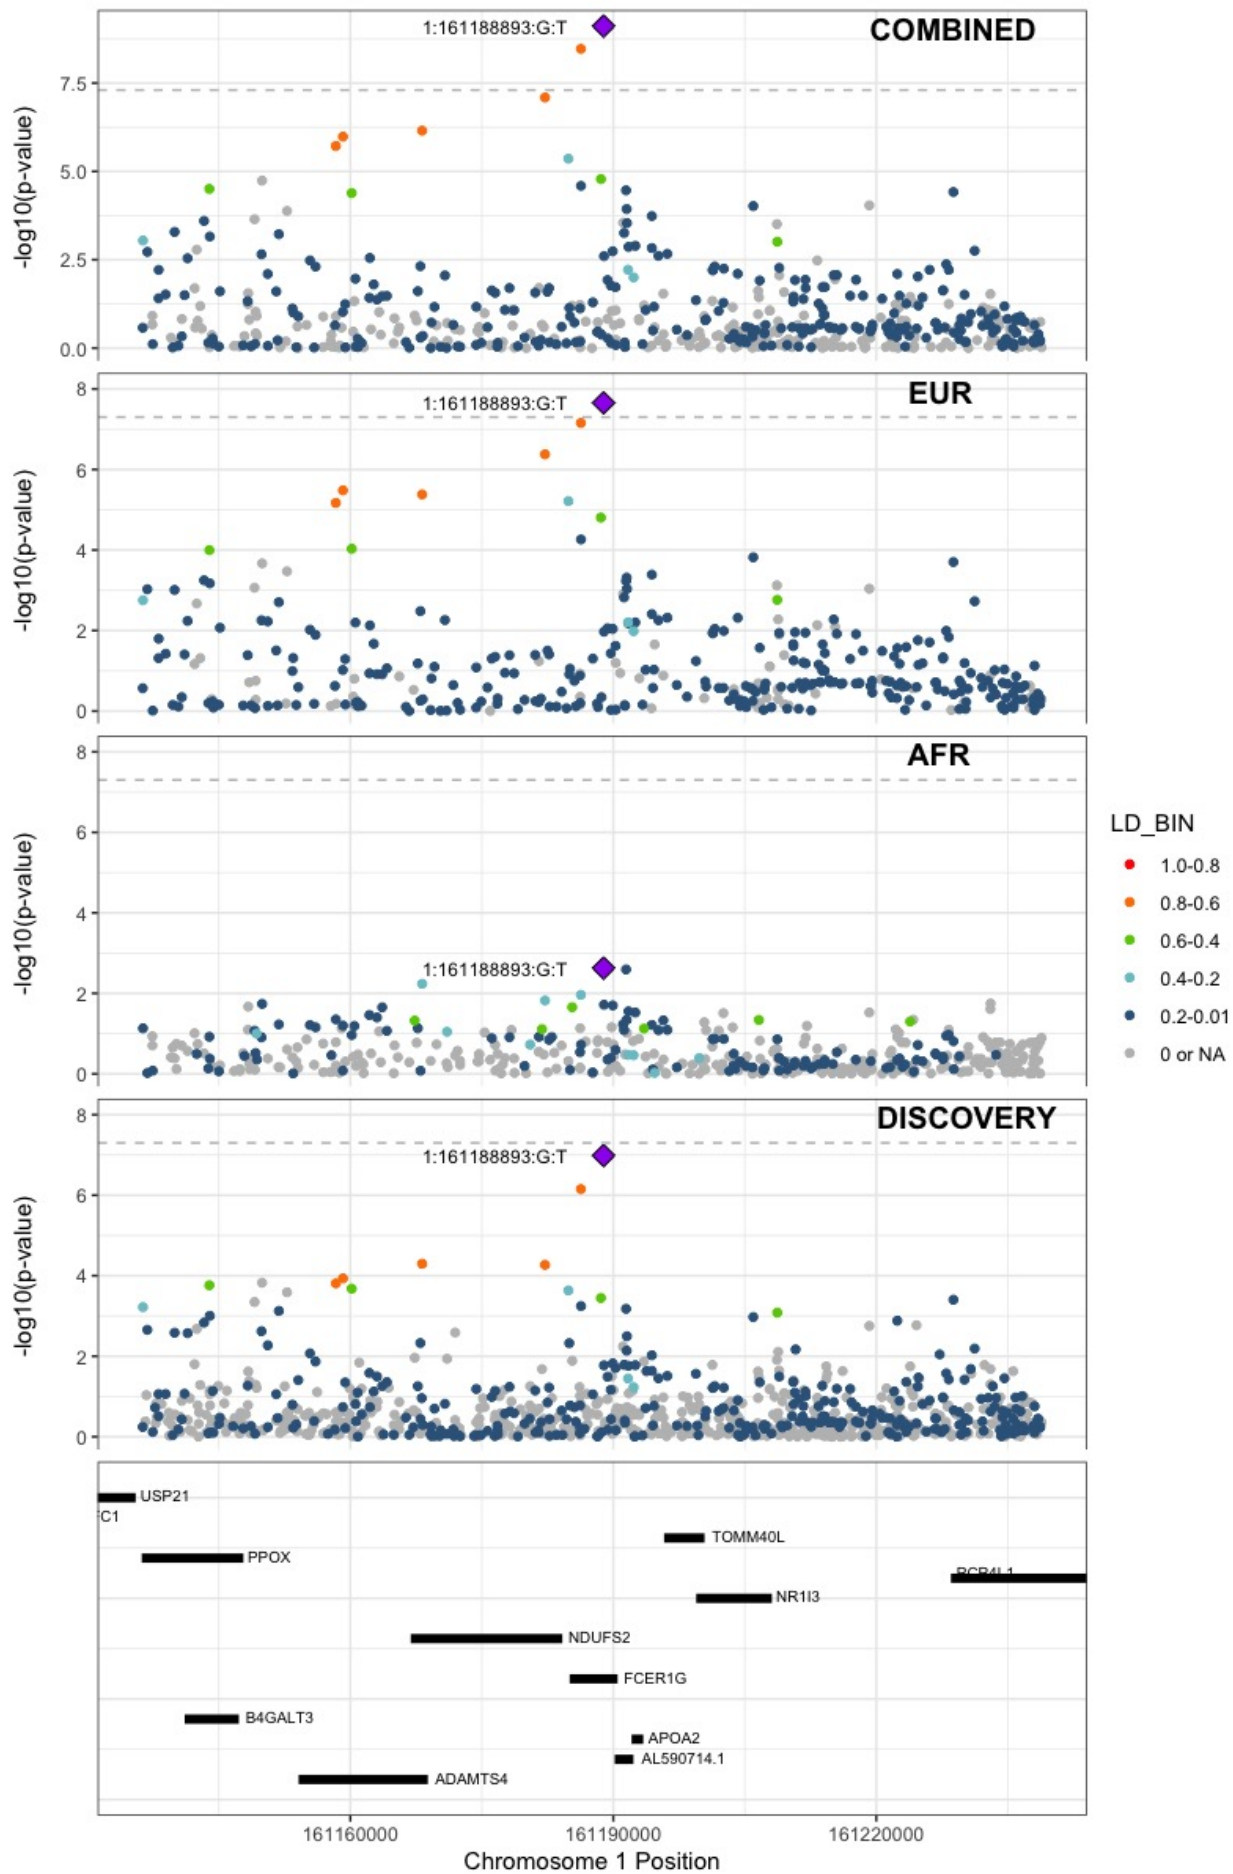

Supplementary Figure 6.9 – rs6025 (chr1:169519049) in locus 9 (F5)

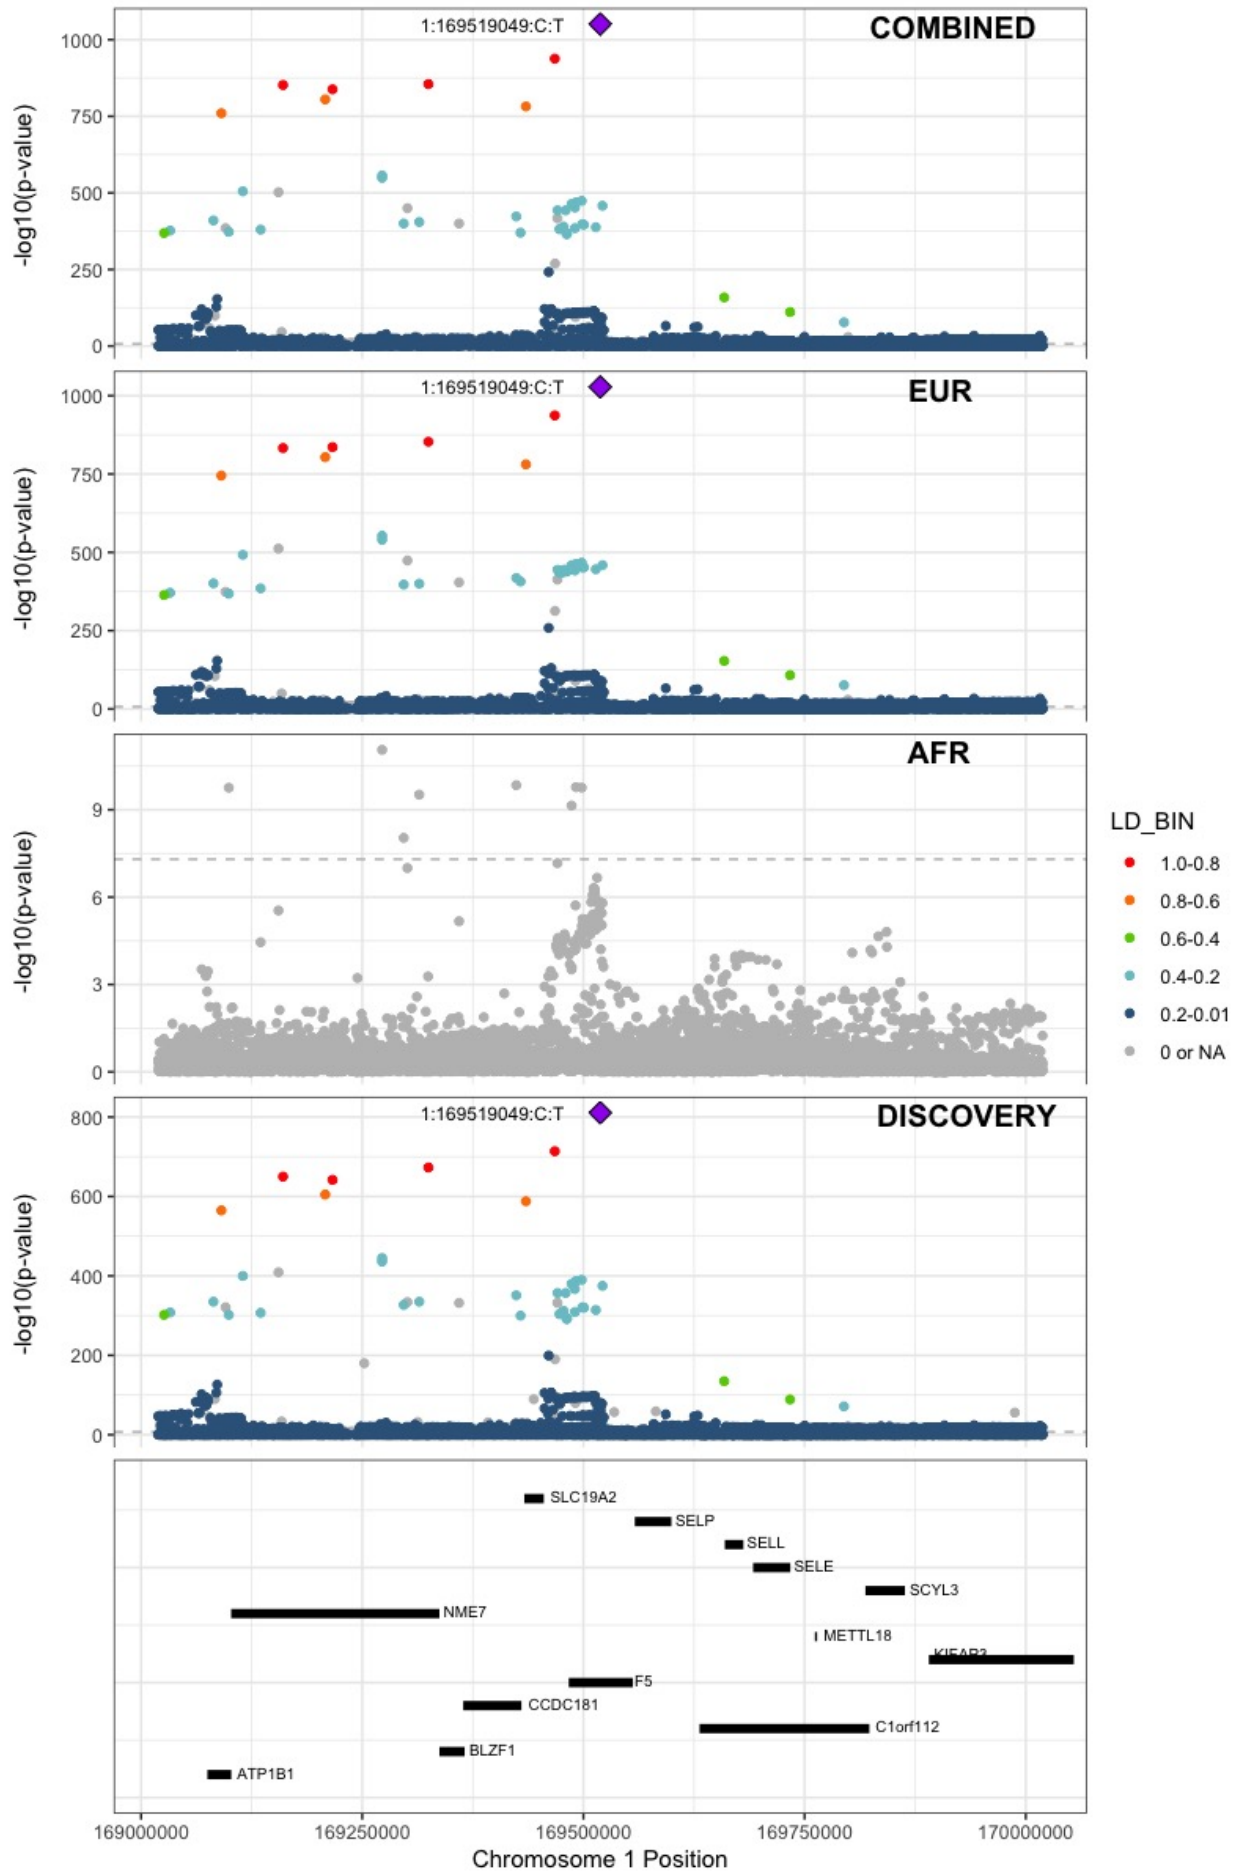

Supplementary Figure 6.10 – rs6695940 (chr1:173882980) in locus 10 (SERPINC1)

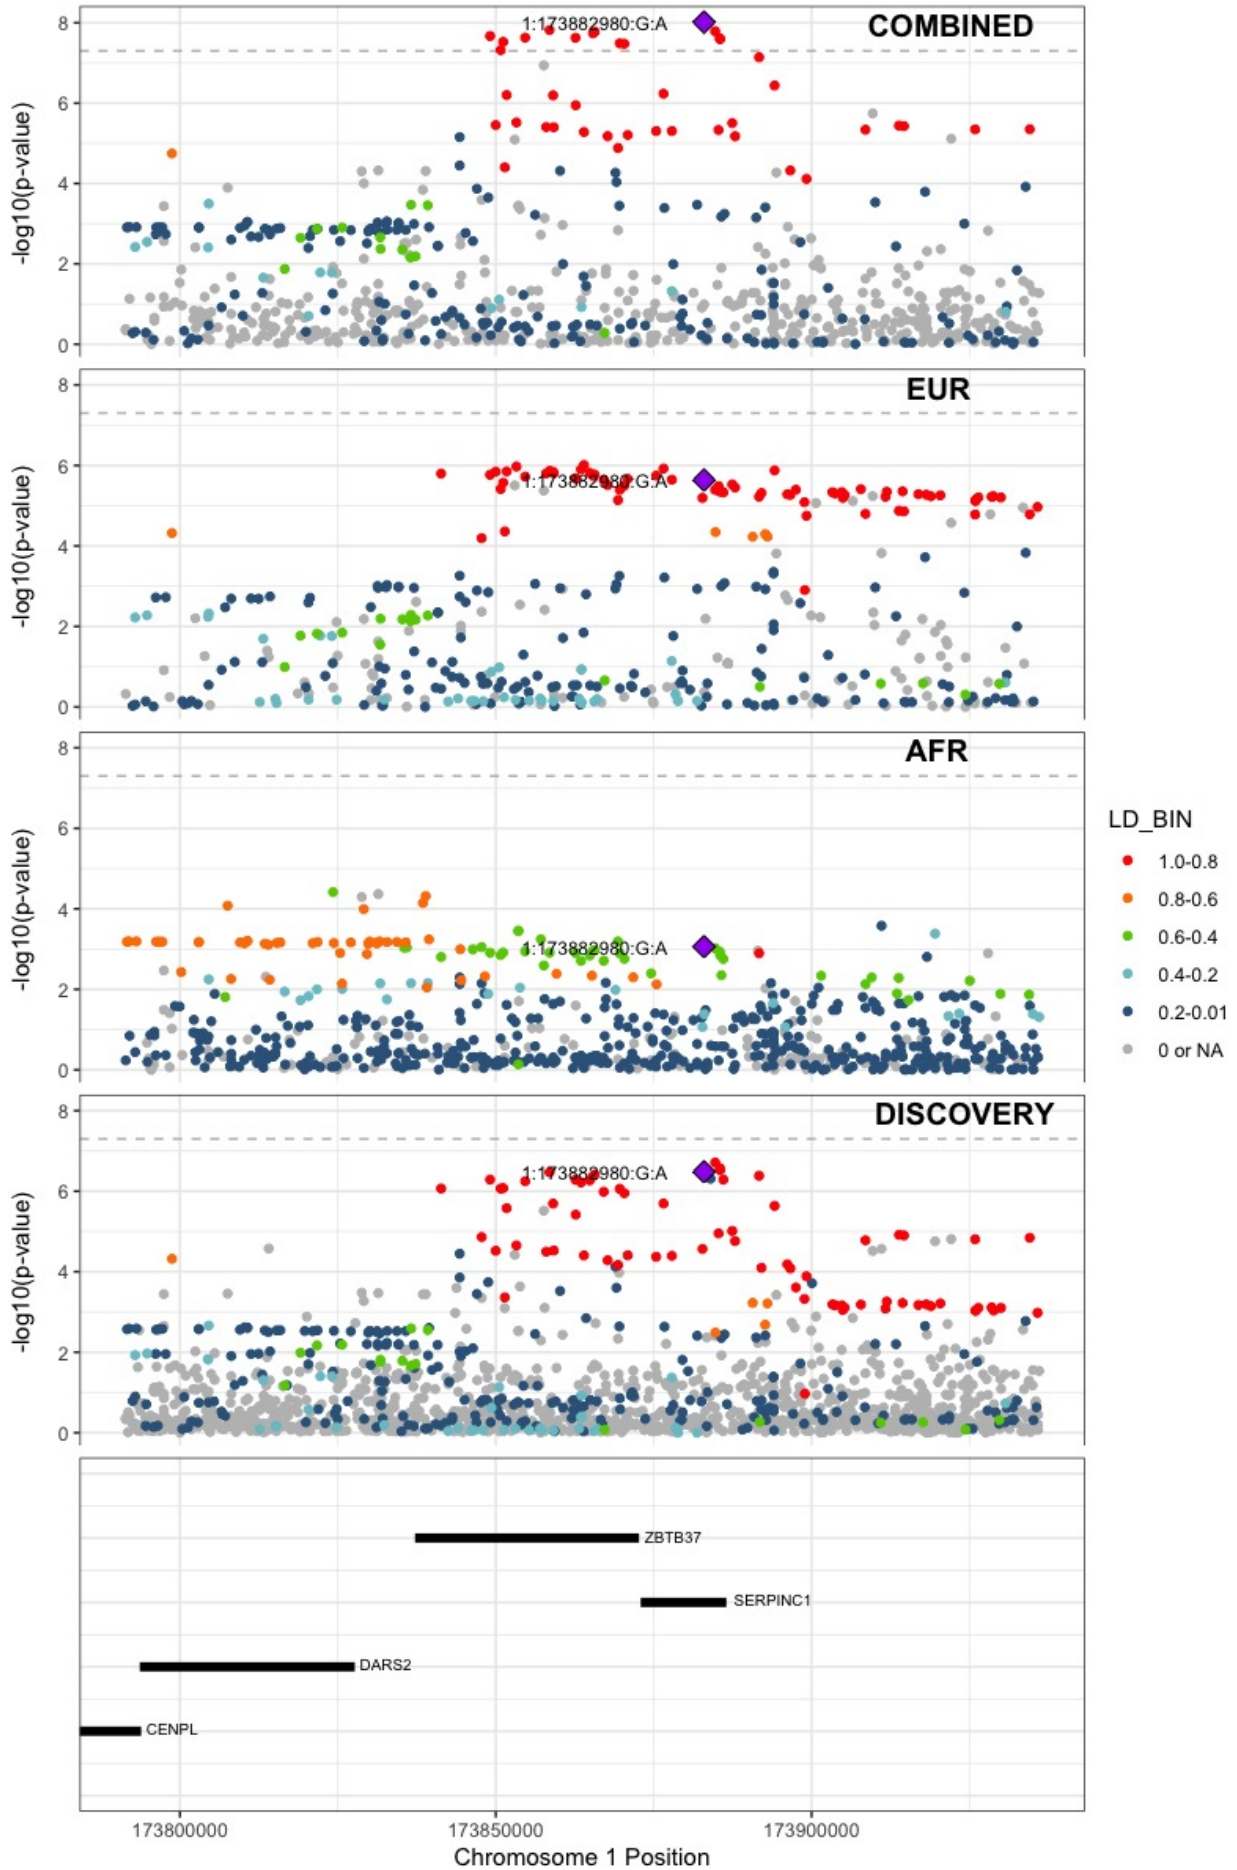

Supplementary Figure 6.11 – rs143410348 (chr1:196809316) in locus 12 (CFHR1;CFHR4)

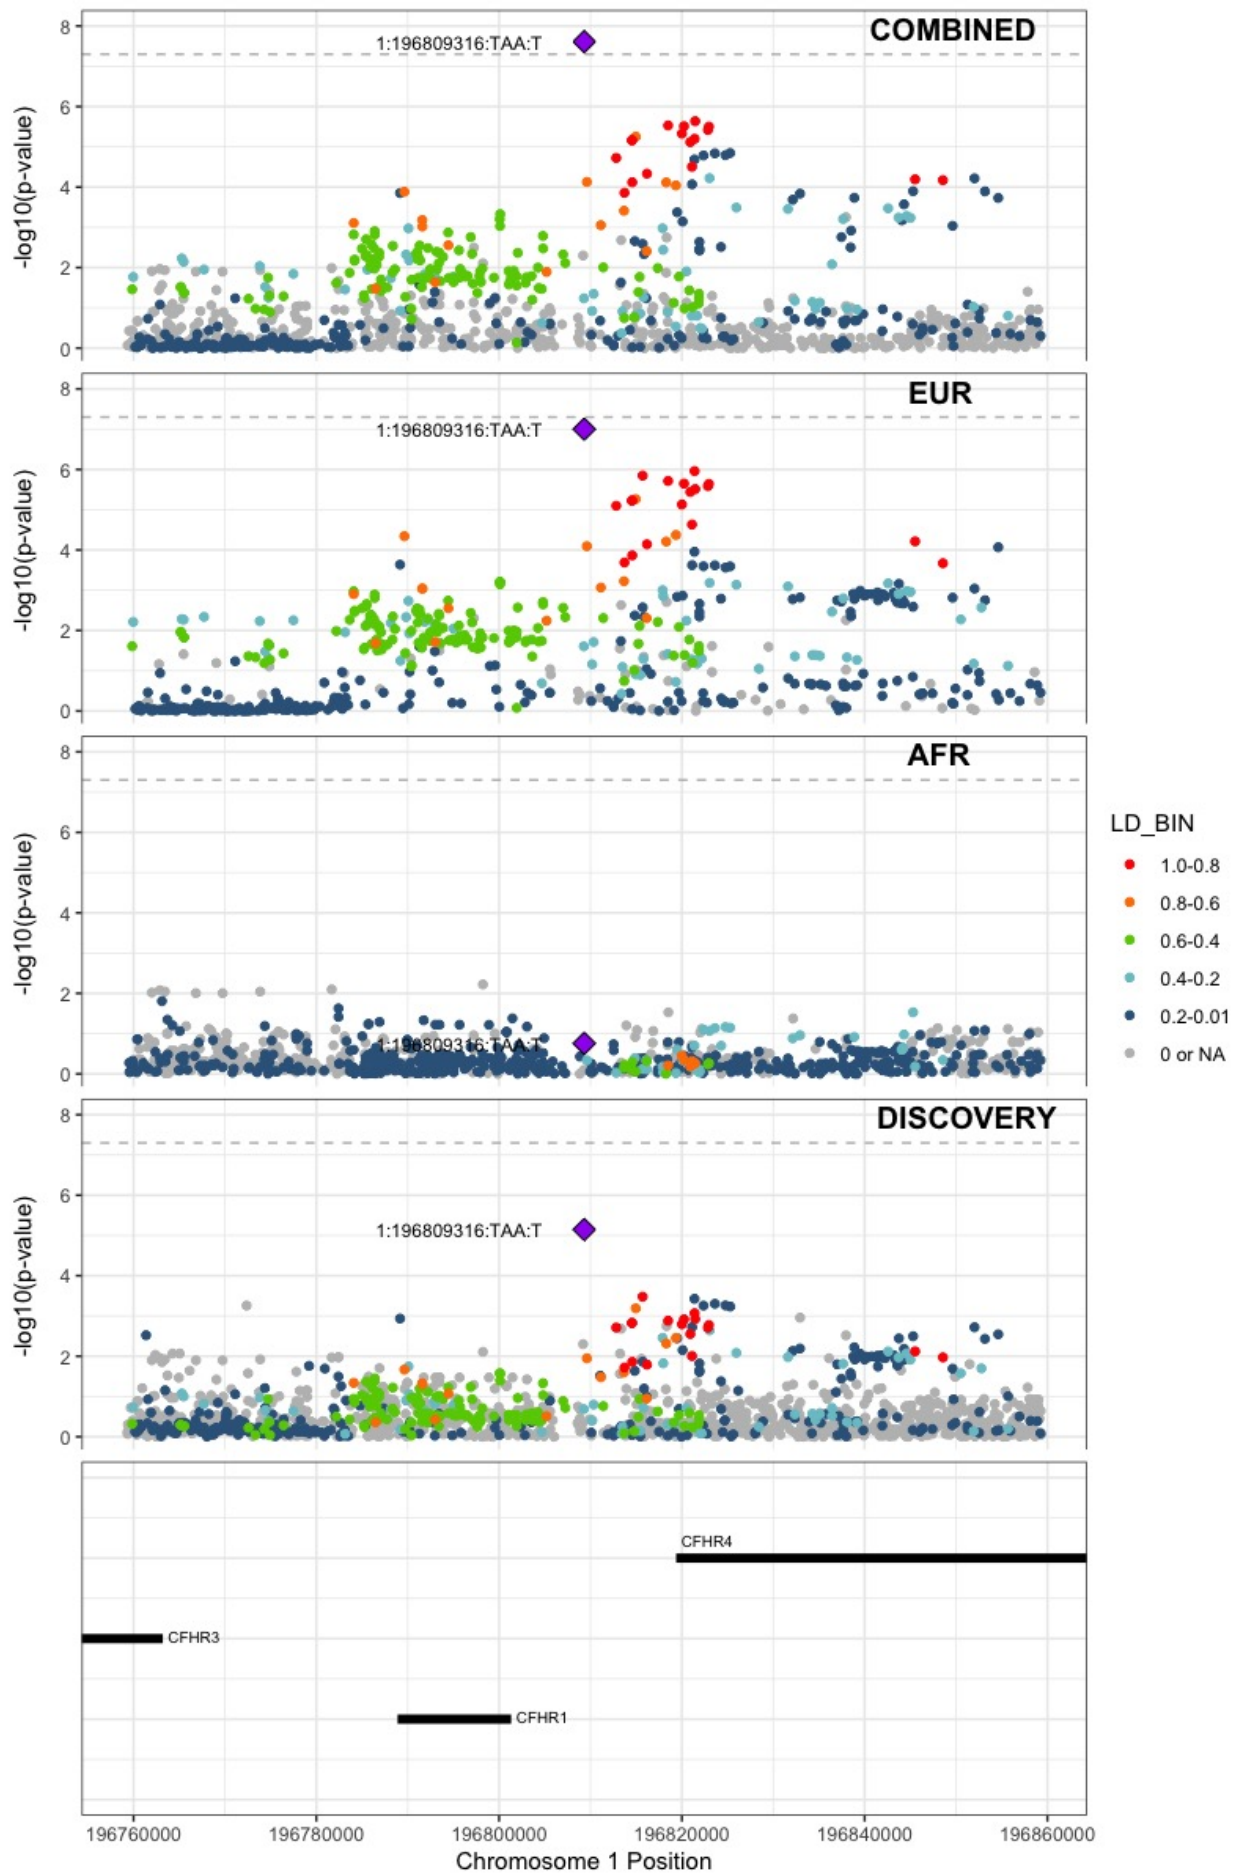

Supplementary Figure 6.12 – rs2842700 (chr1:207282149) in locus 13 (C4BPA)

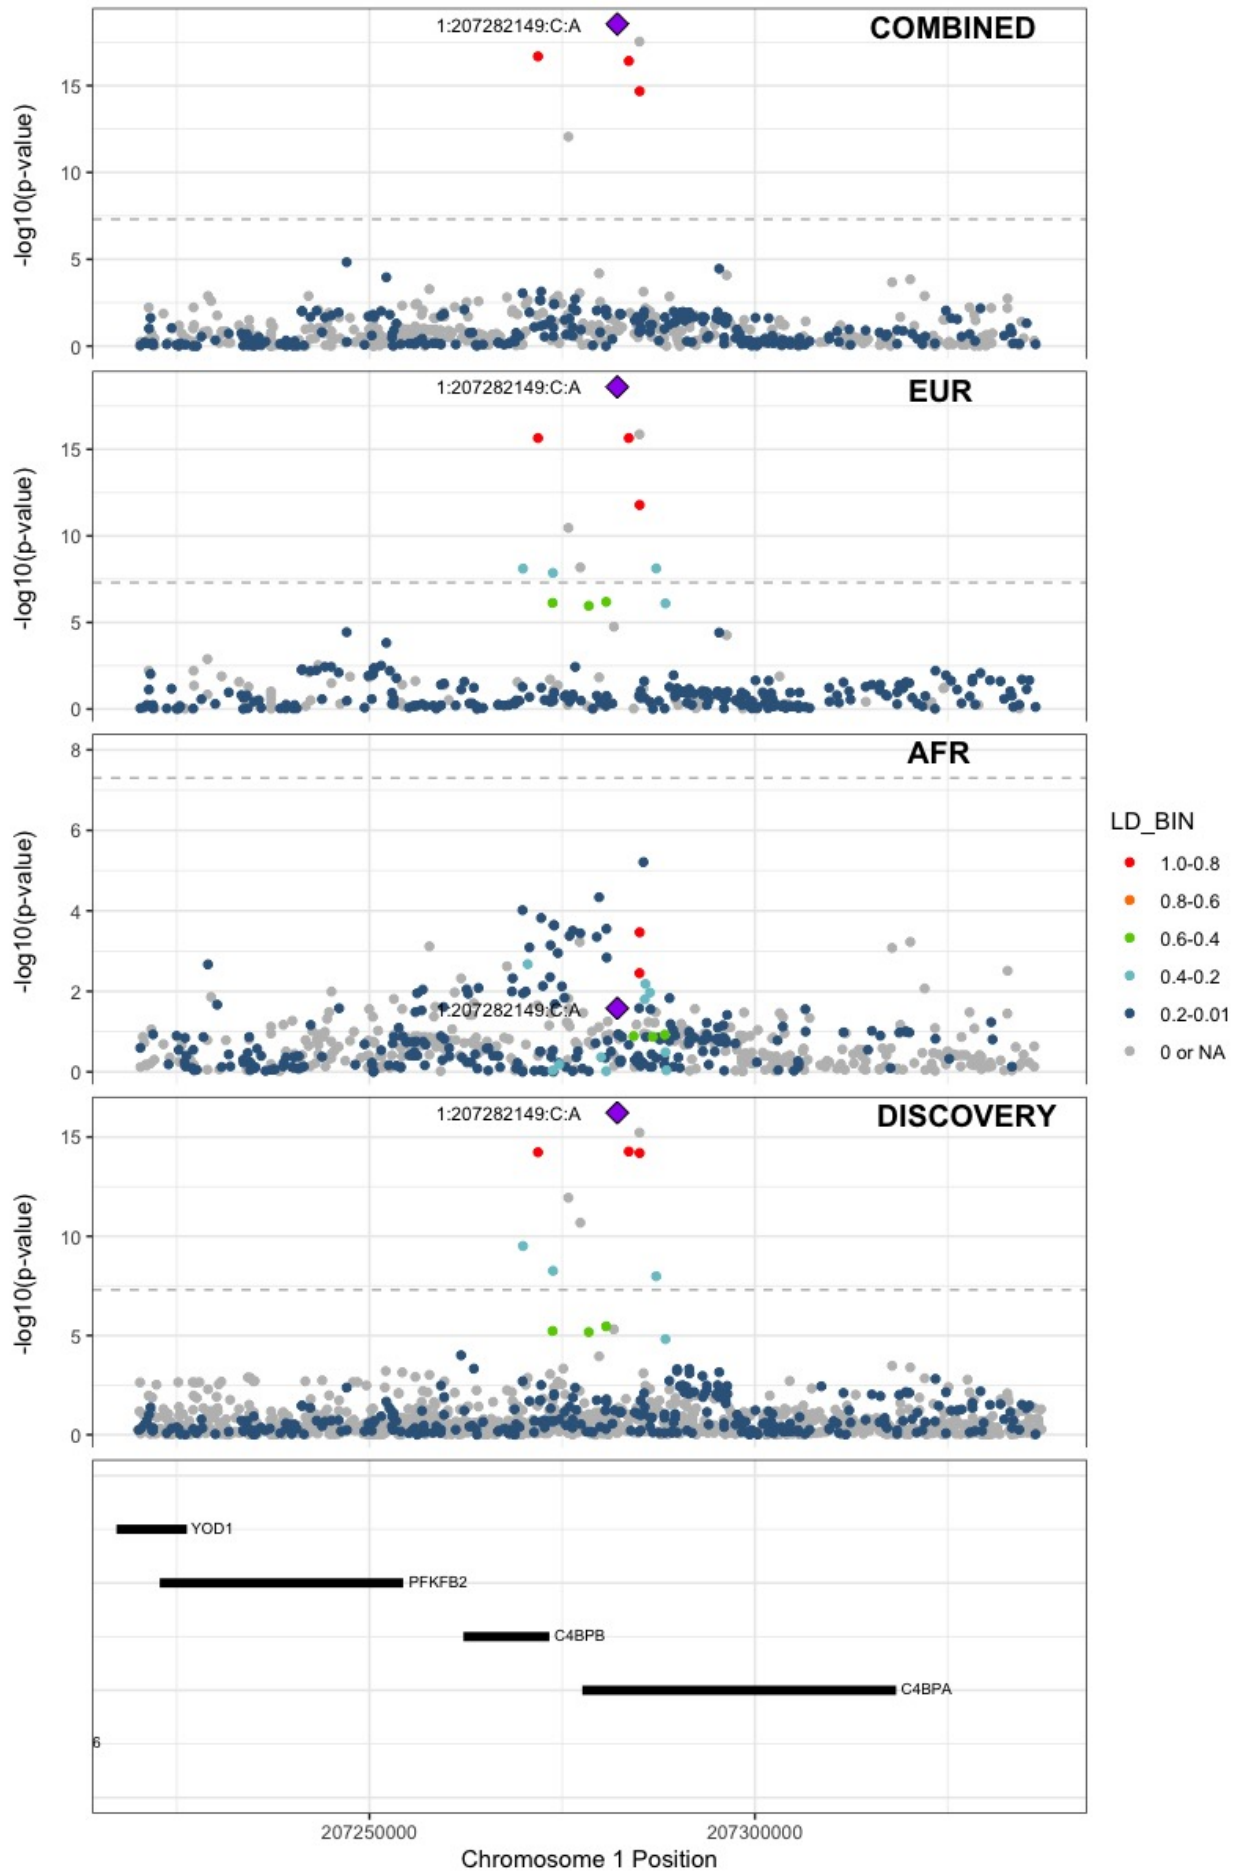

Supplementary Figure 6.13 – rs3811444 (chr1:248039451) in locus 14 (TRIM58)

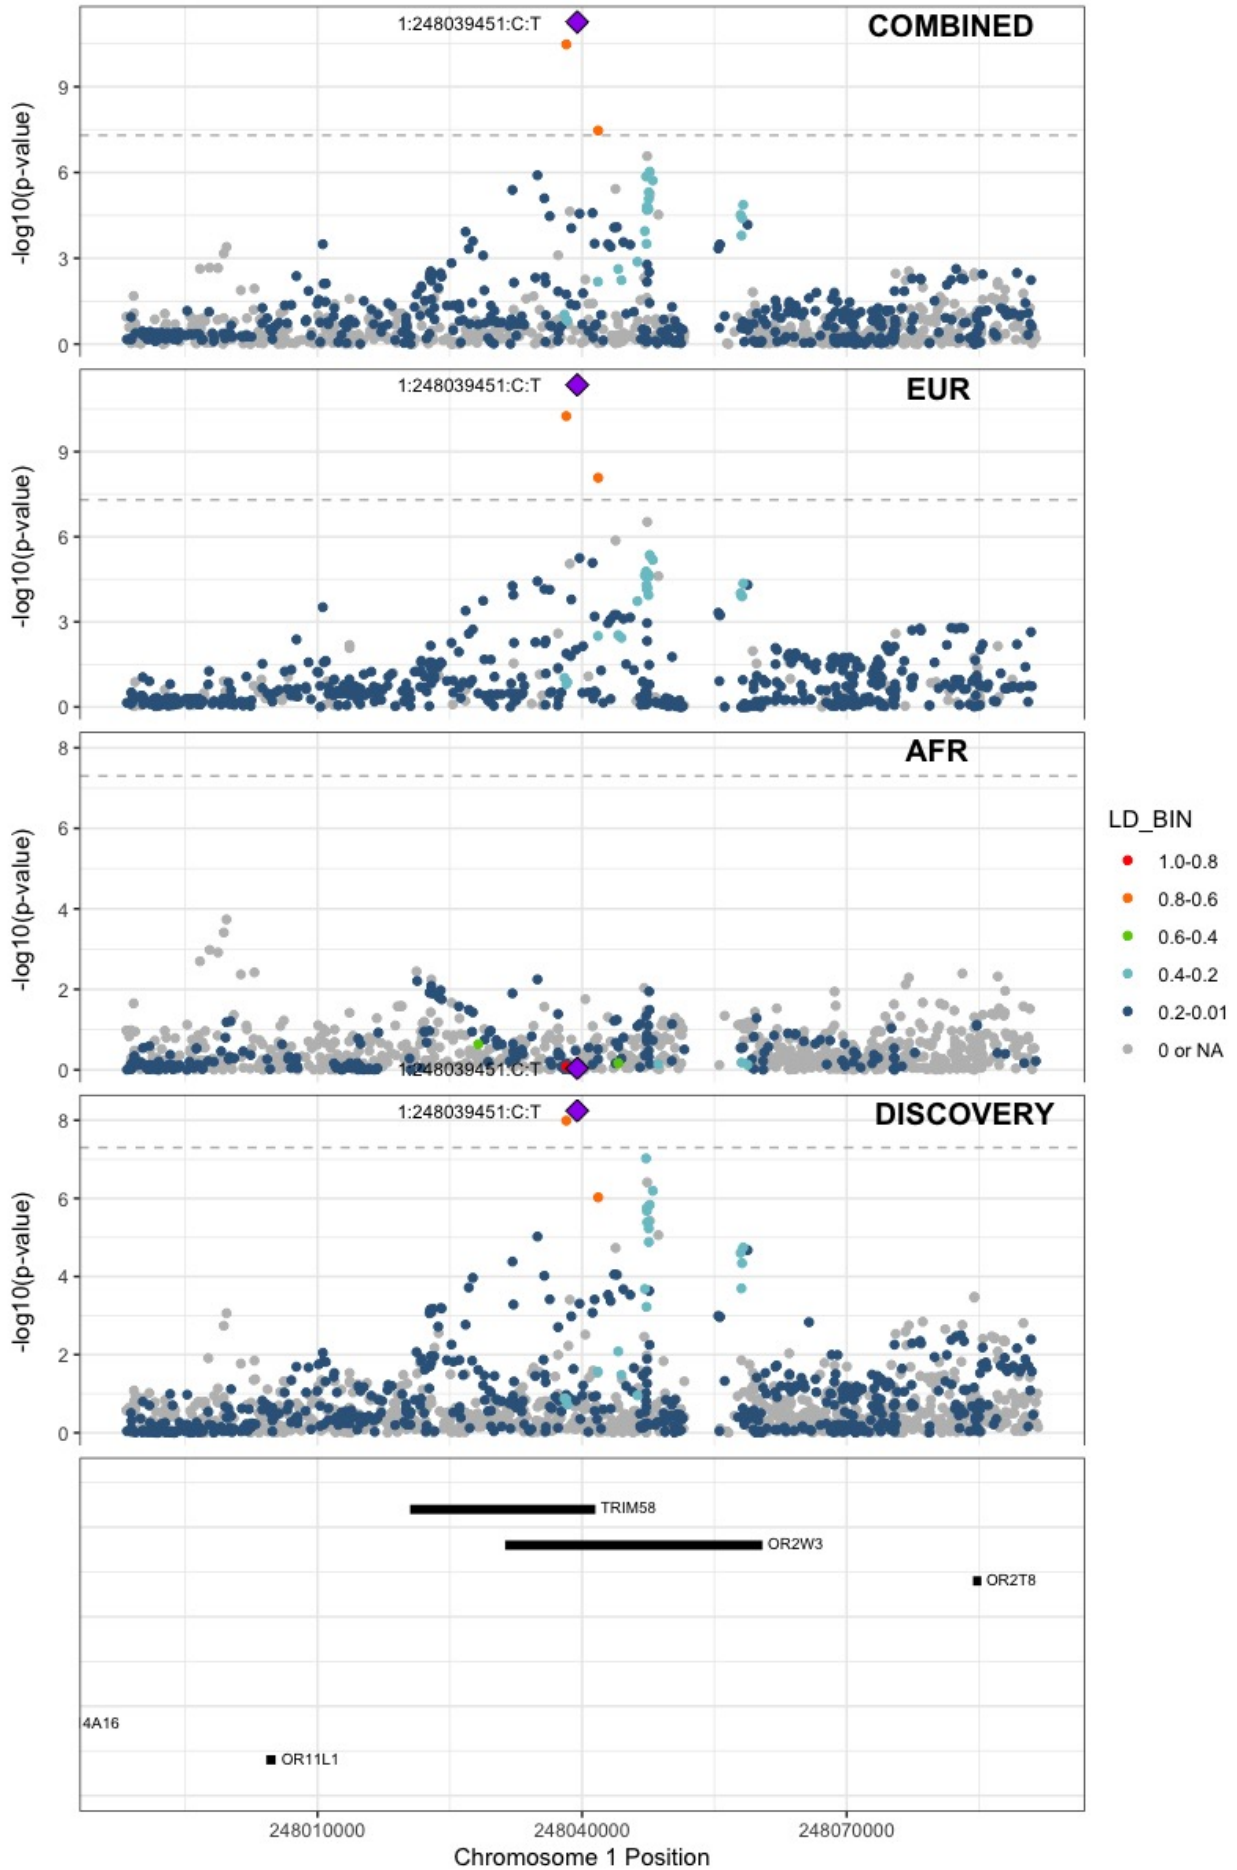



Supplementary Figure 6.14 – rs78475244 (chr2:65086804) in locus 16 (LINC01800)

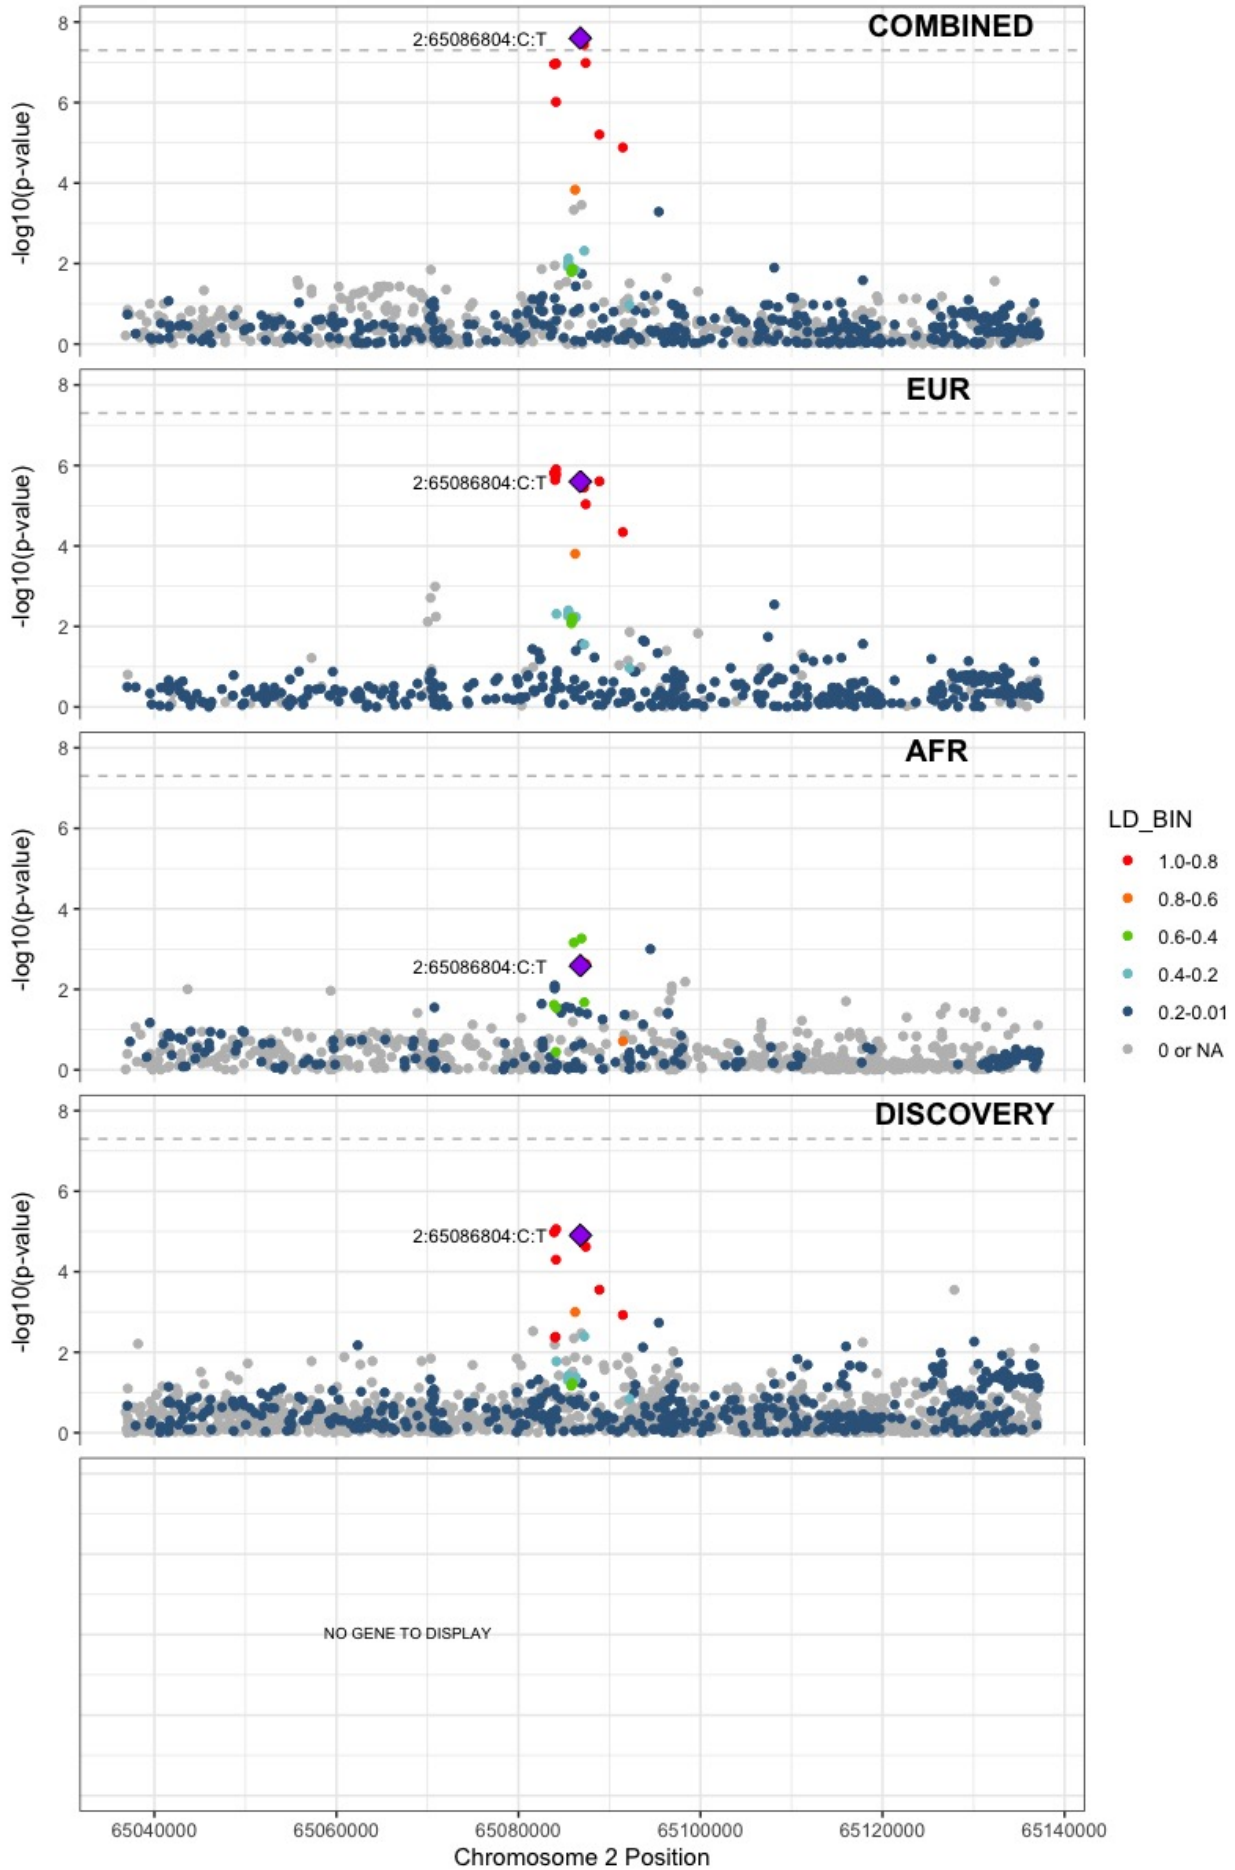

Supplementary Figure 6.15 – rs1867312 (chr2:68619981) in locus 17 (PLEK)

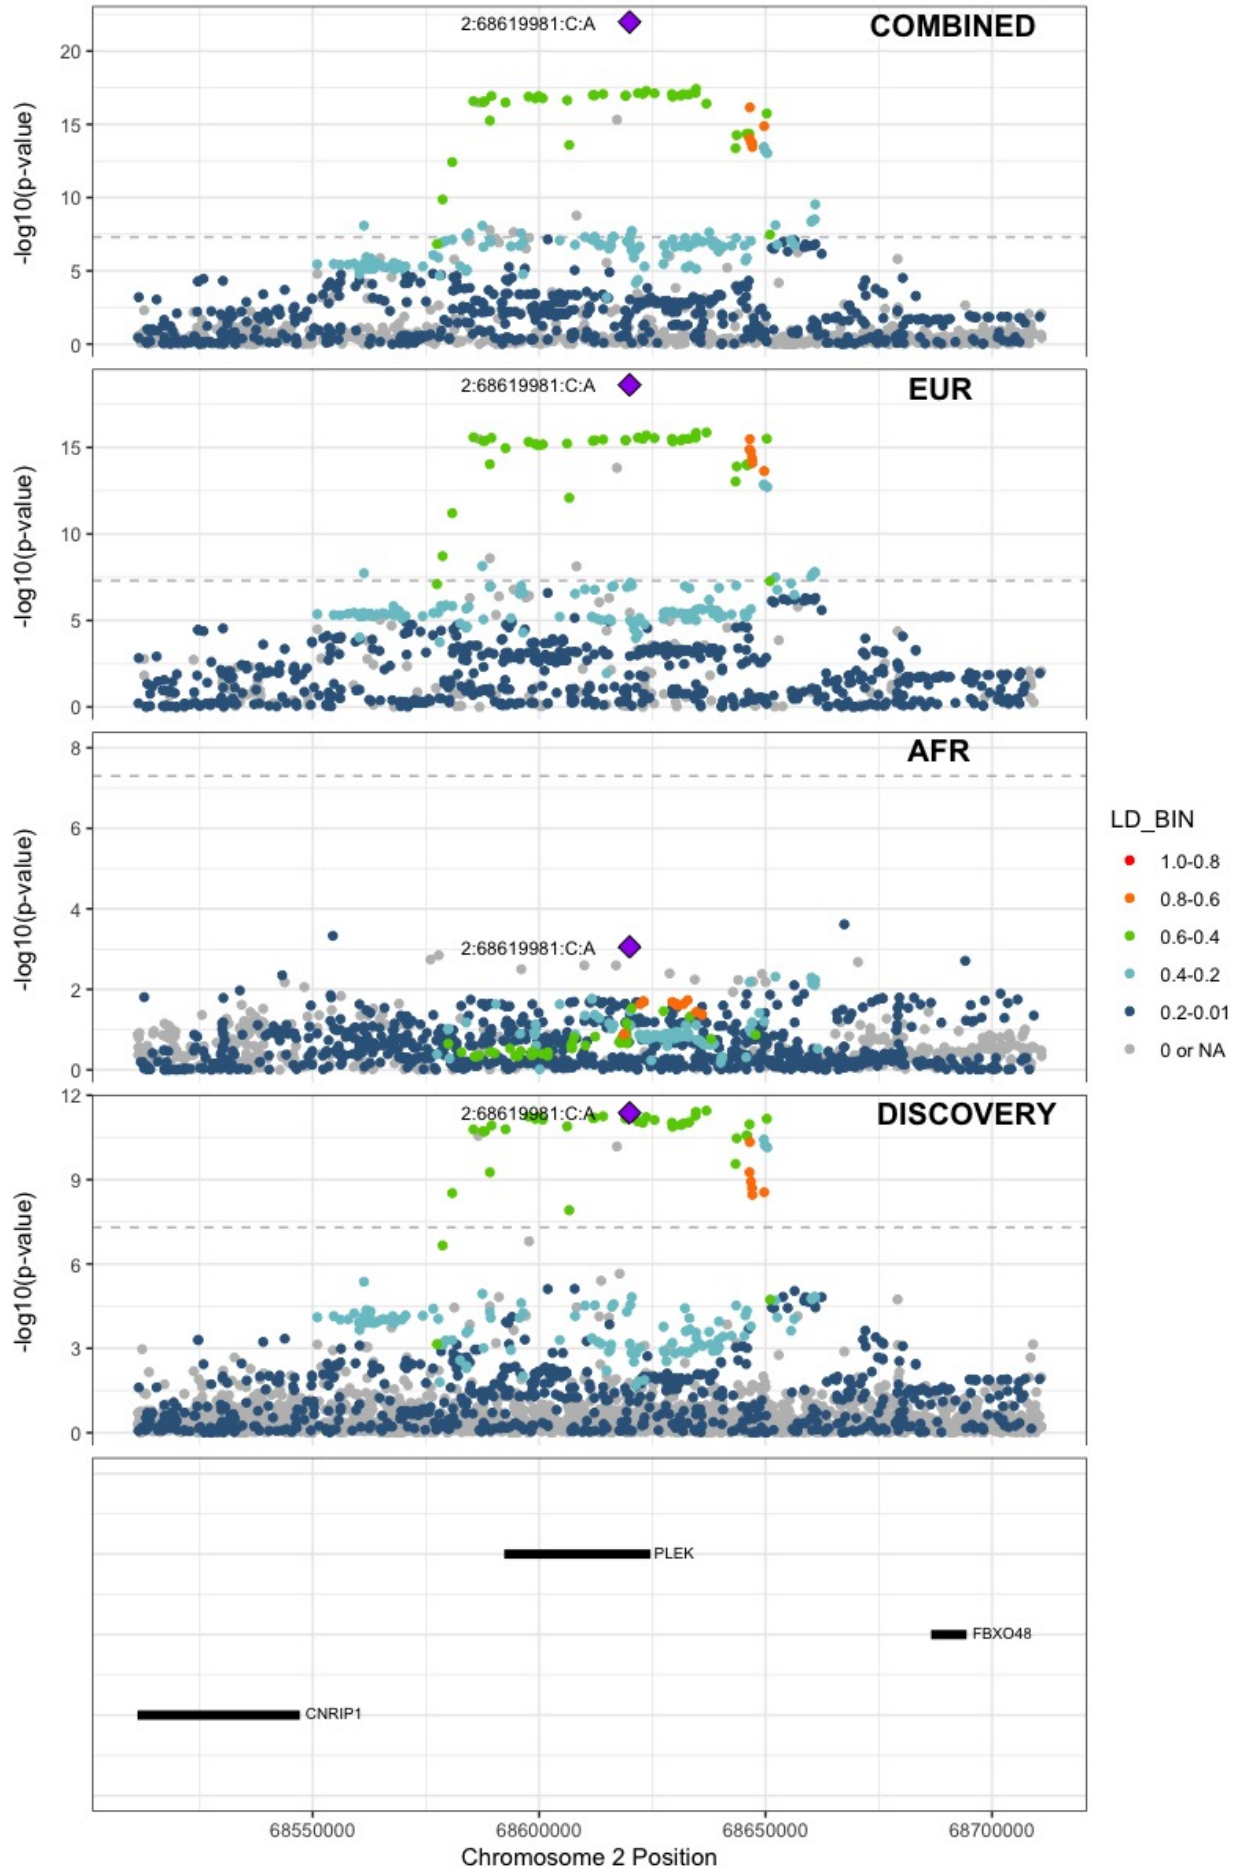

Supplementary Figure 6.16 – rs1518760 (chr2:128140500) in locus 18 (MAP3K2)

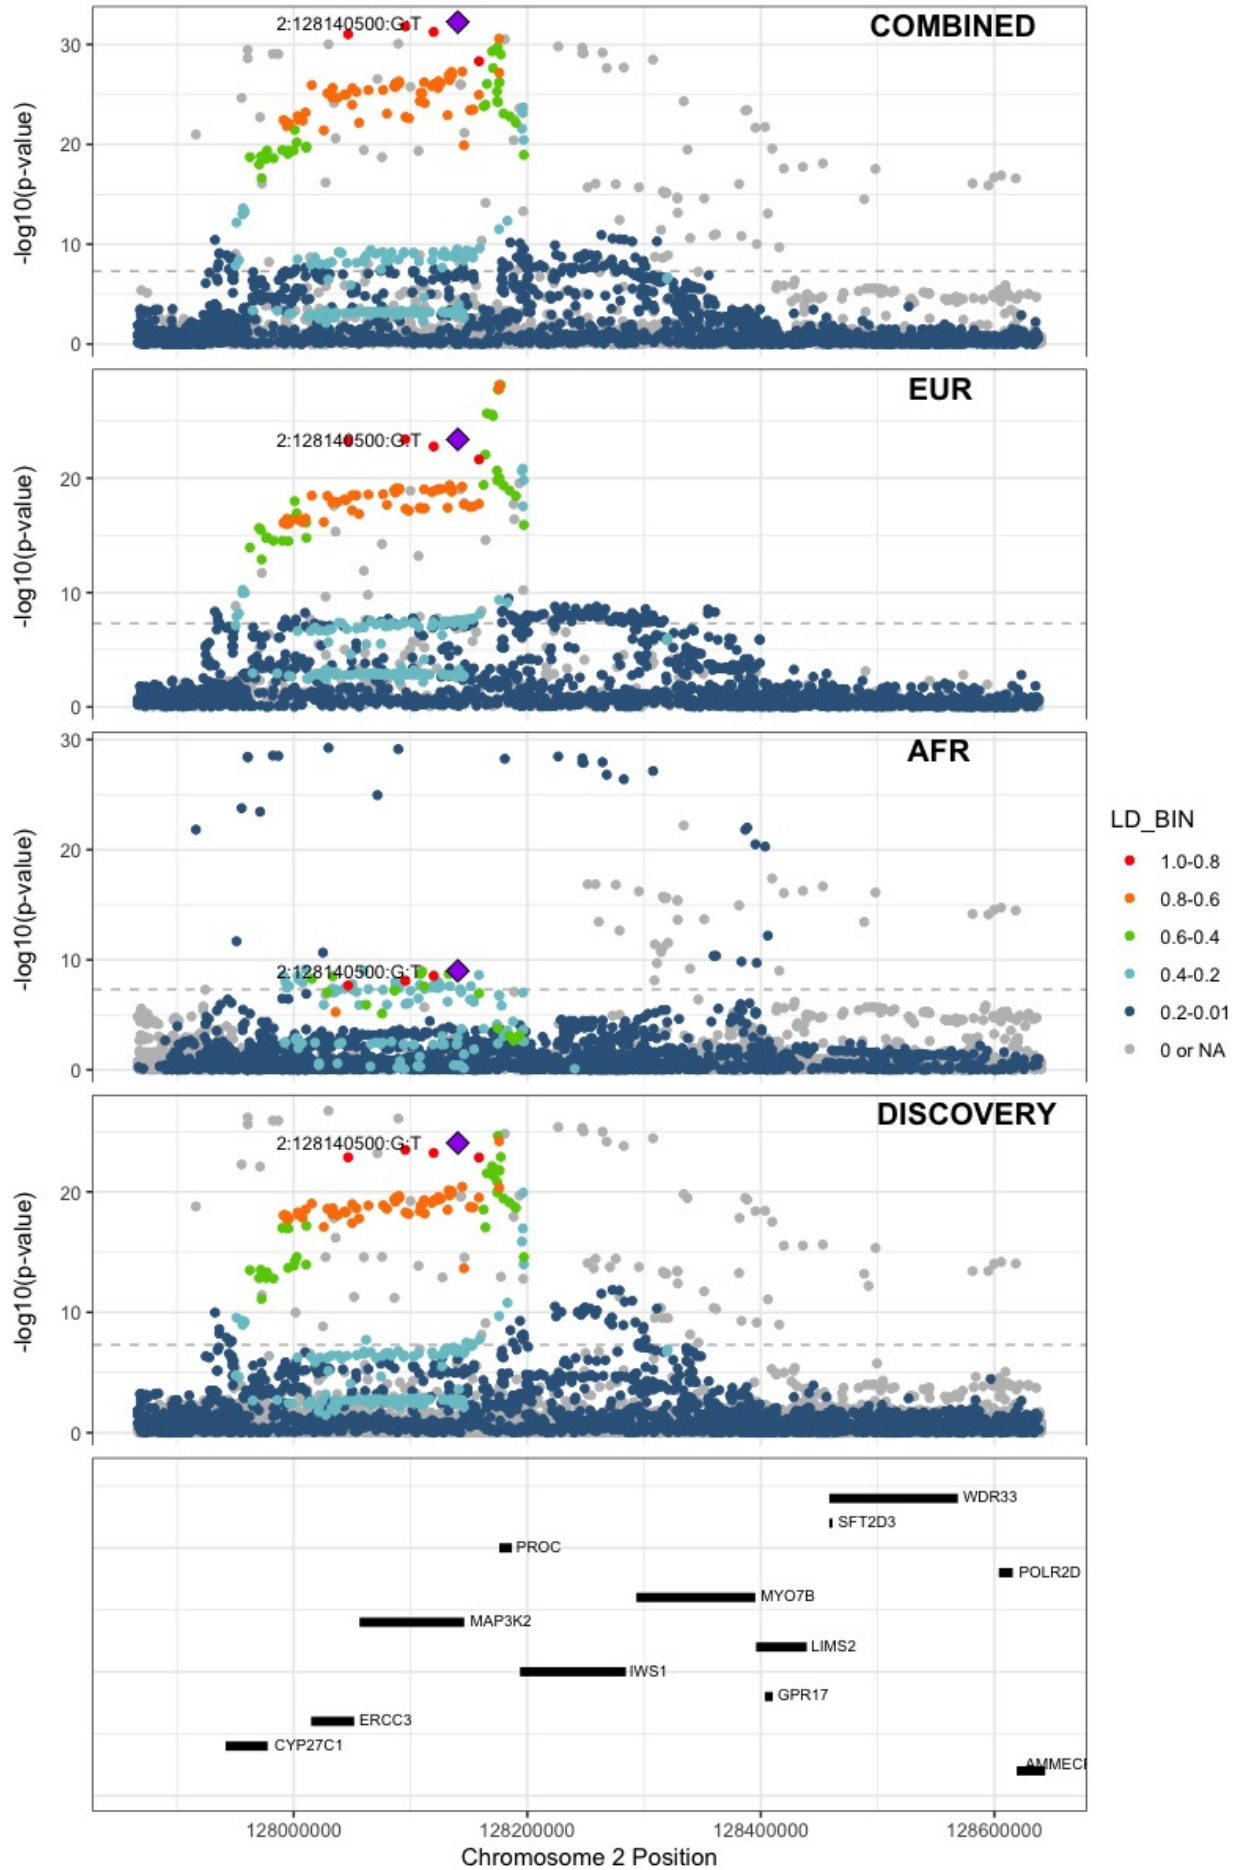

Supplementary Figure 6.17 – rs1912849 (chr2:188310118) in locus 19 (CALCRL)

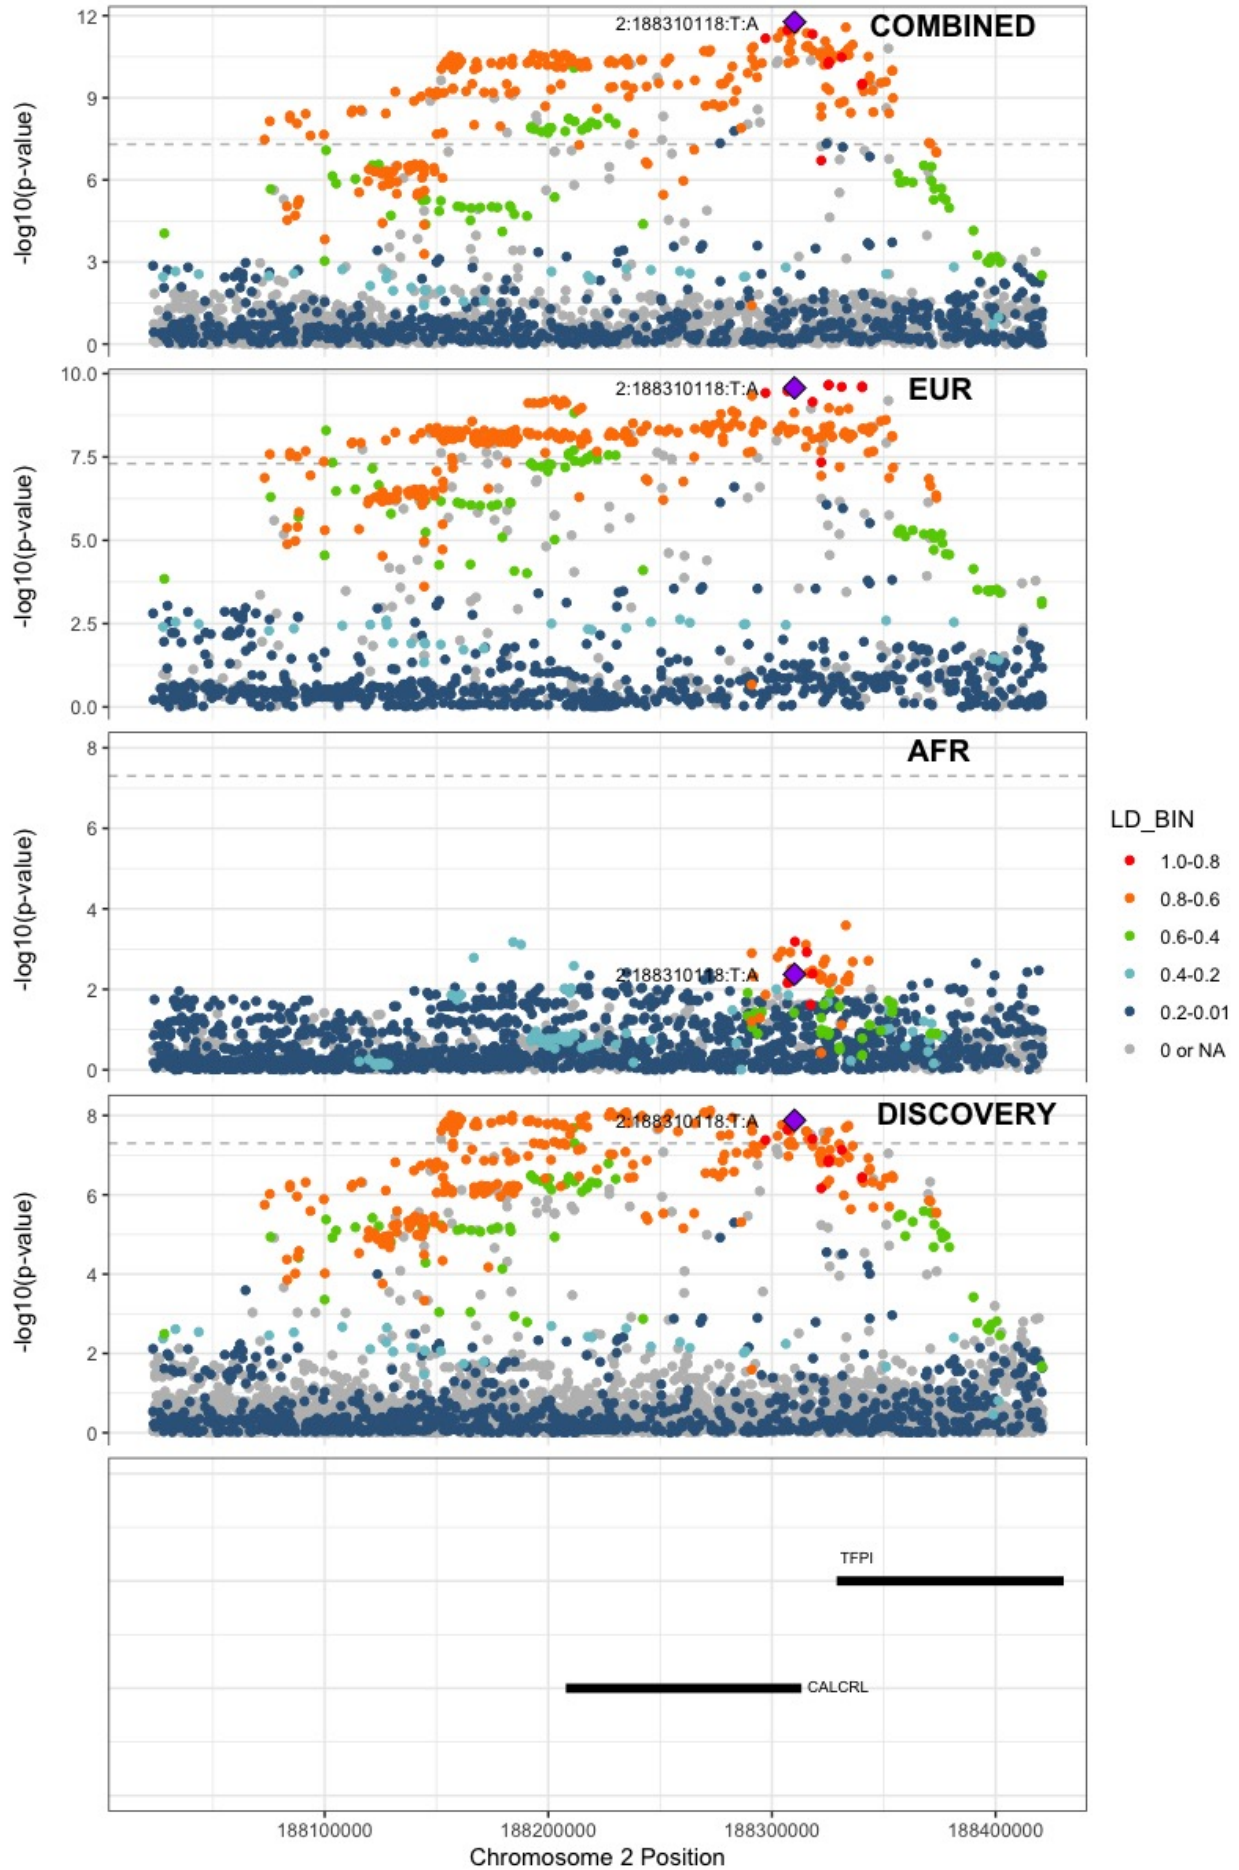

Supplementary Figure 6.18 – rs78872368 (chr2:198545250) in locus 20 (RFTN2;MARS2)

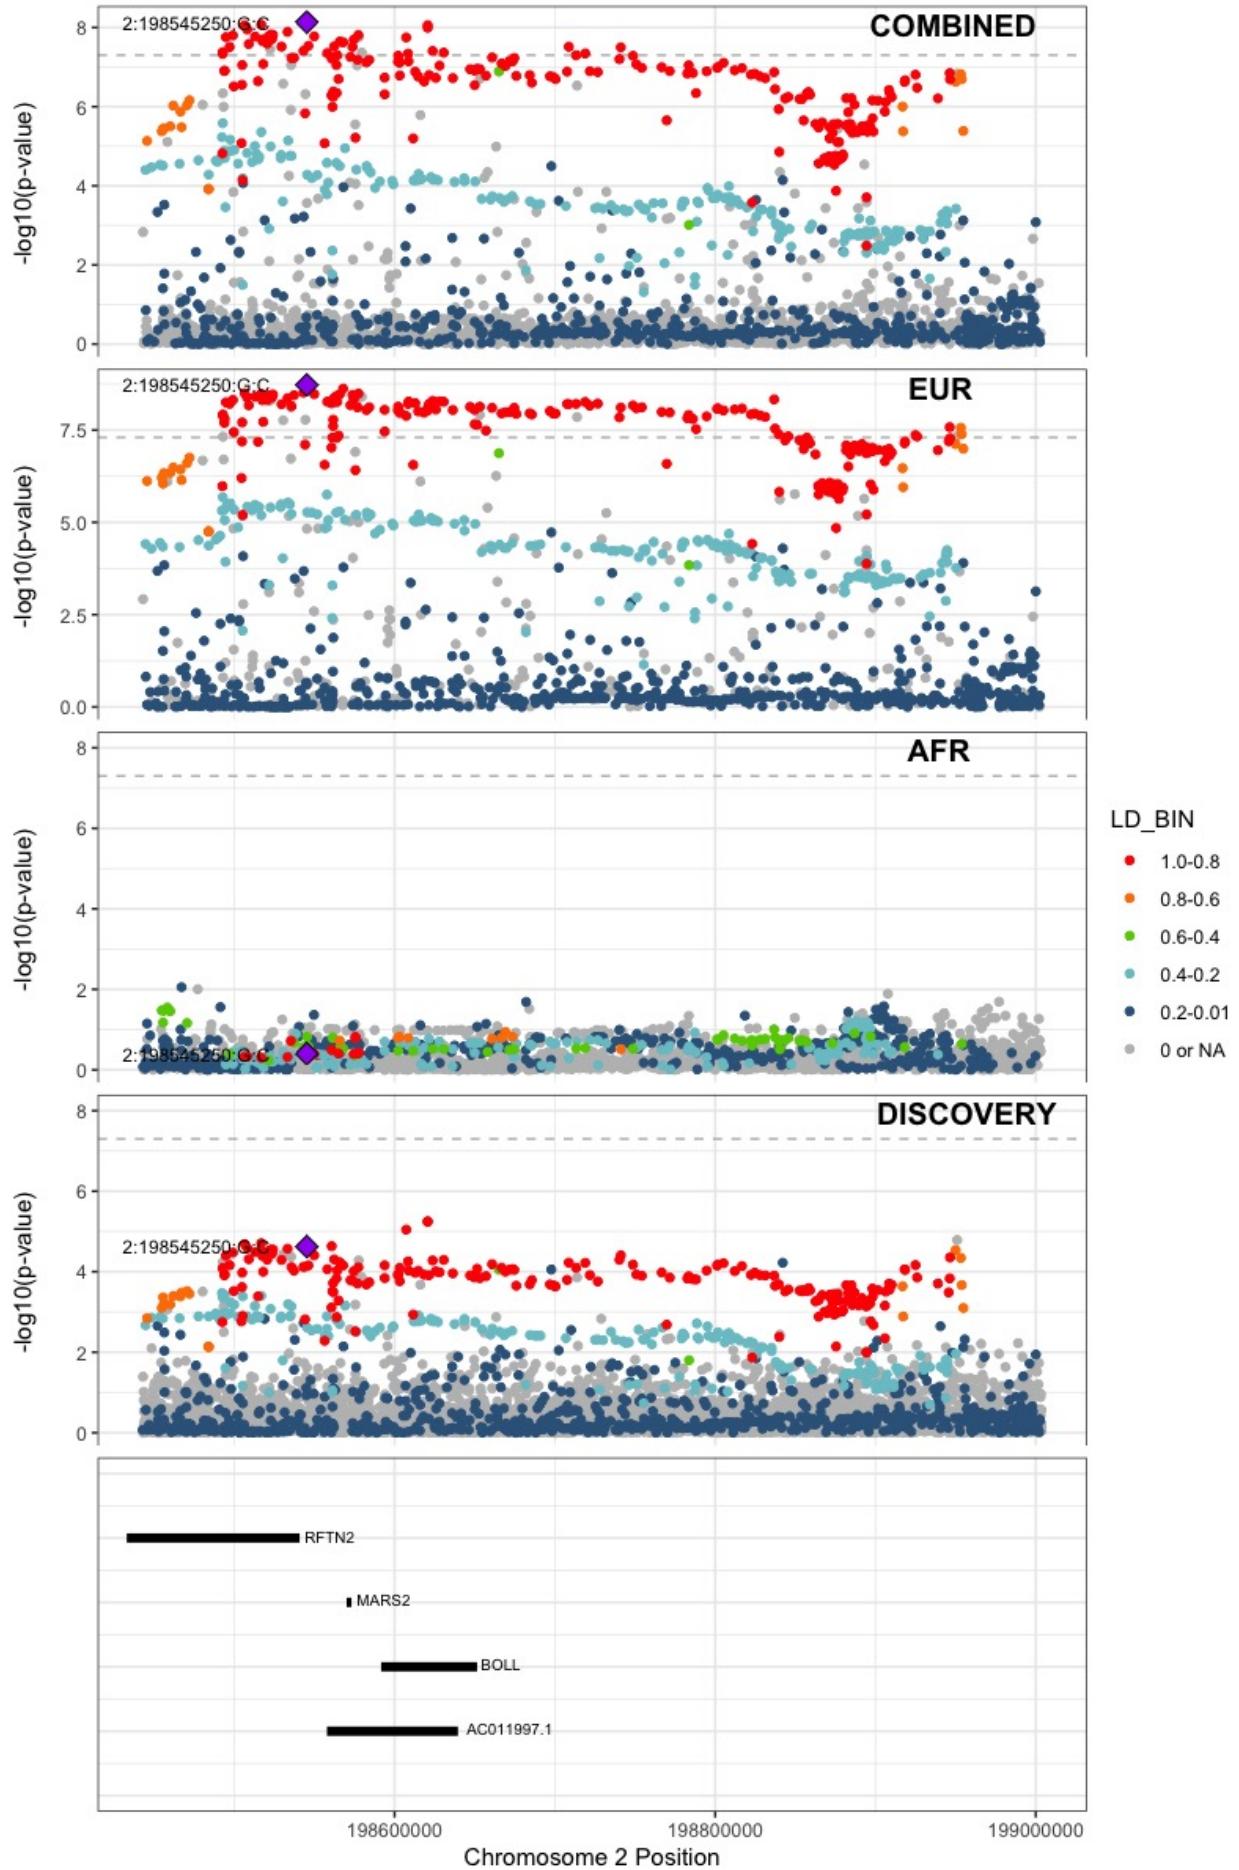

Supplementary Figure 6.19 – rs715 (chr2:211543055) in locus 21 (CPS1)

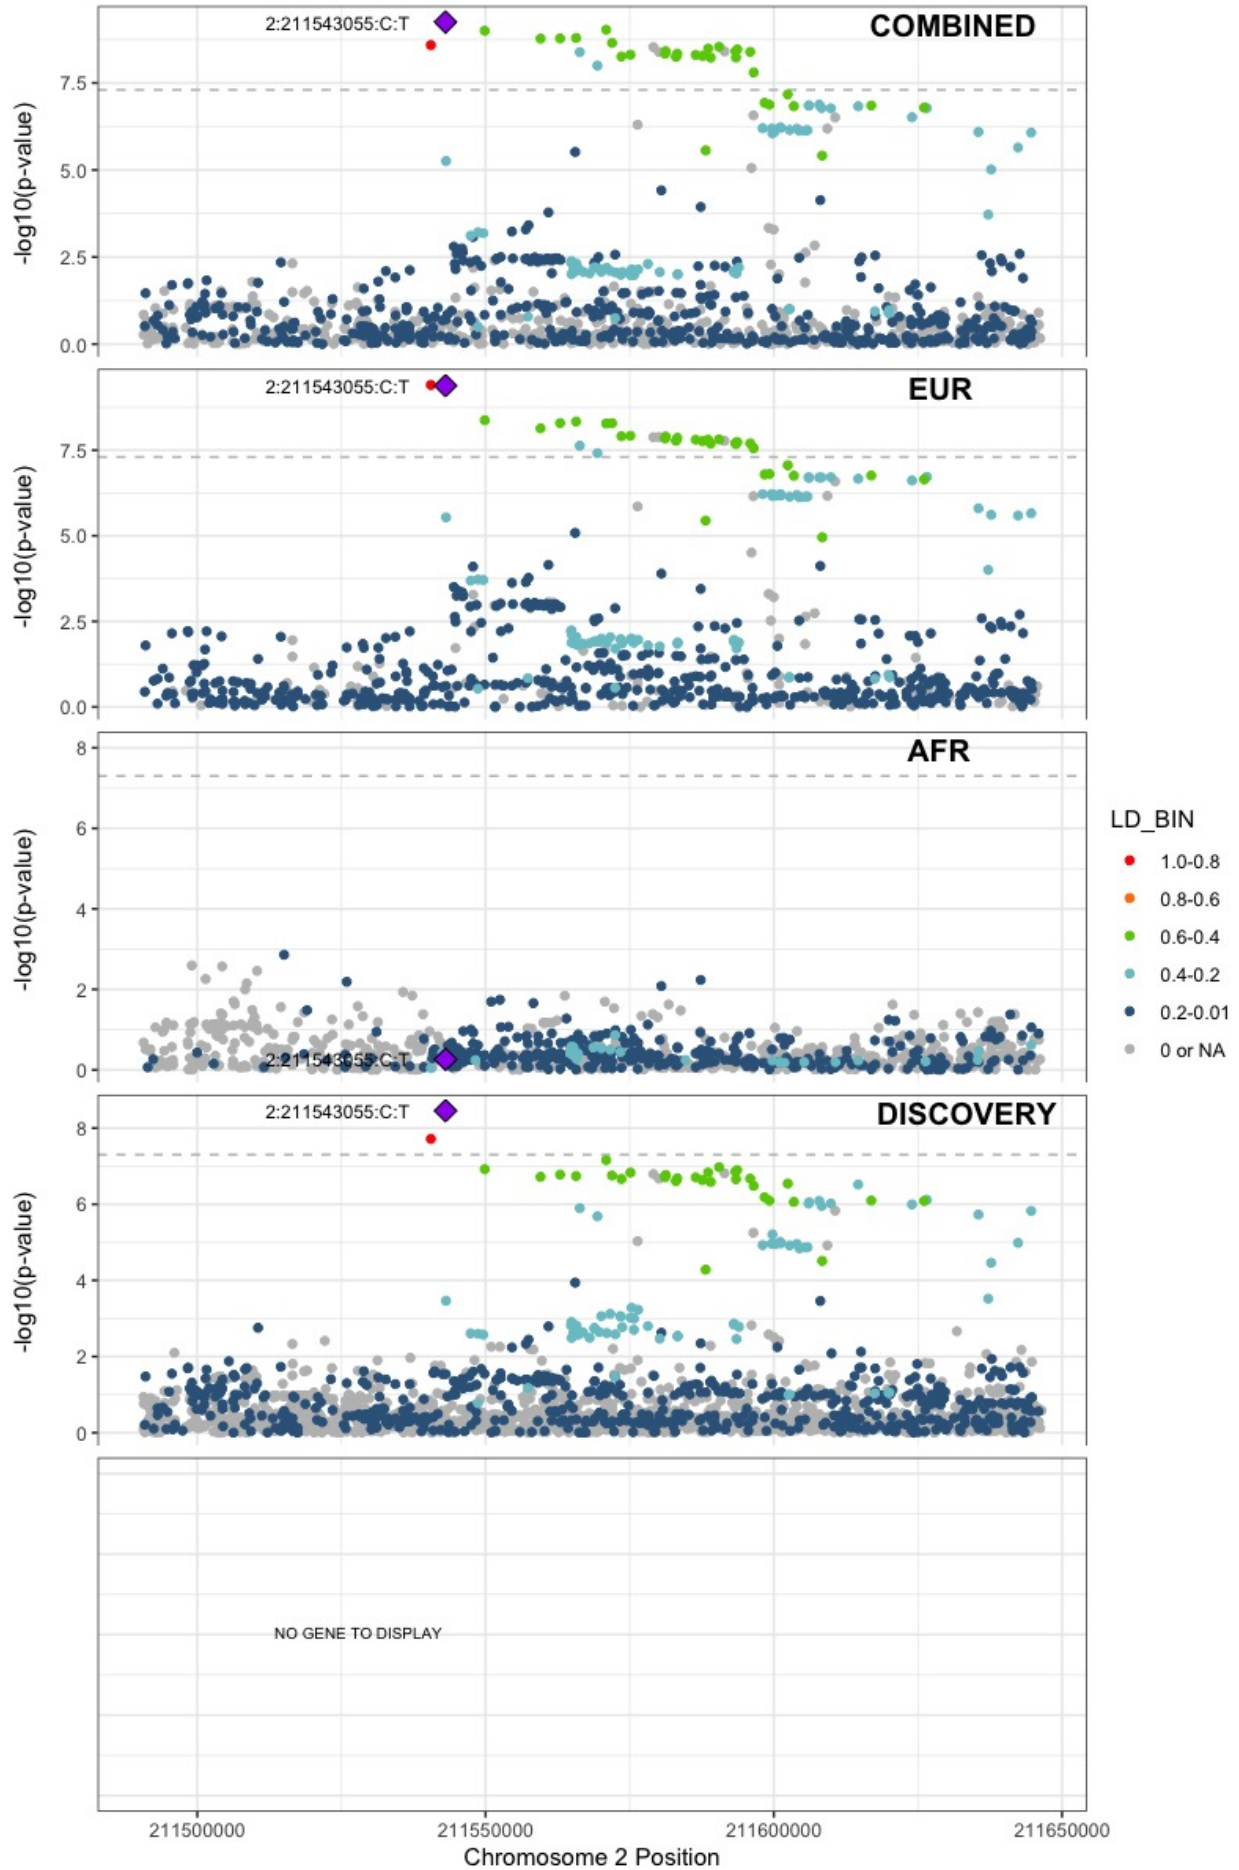

Supplementary Figure 6.20 – rs68066031 (chr2:224880498) in locus 22 (SERPINE2)

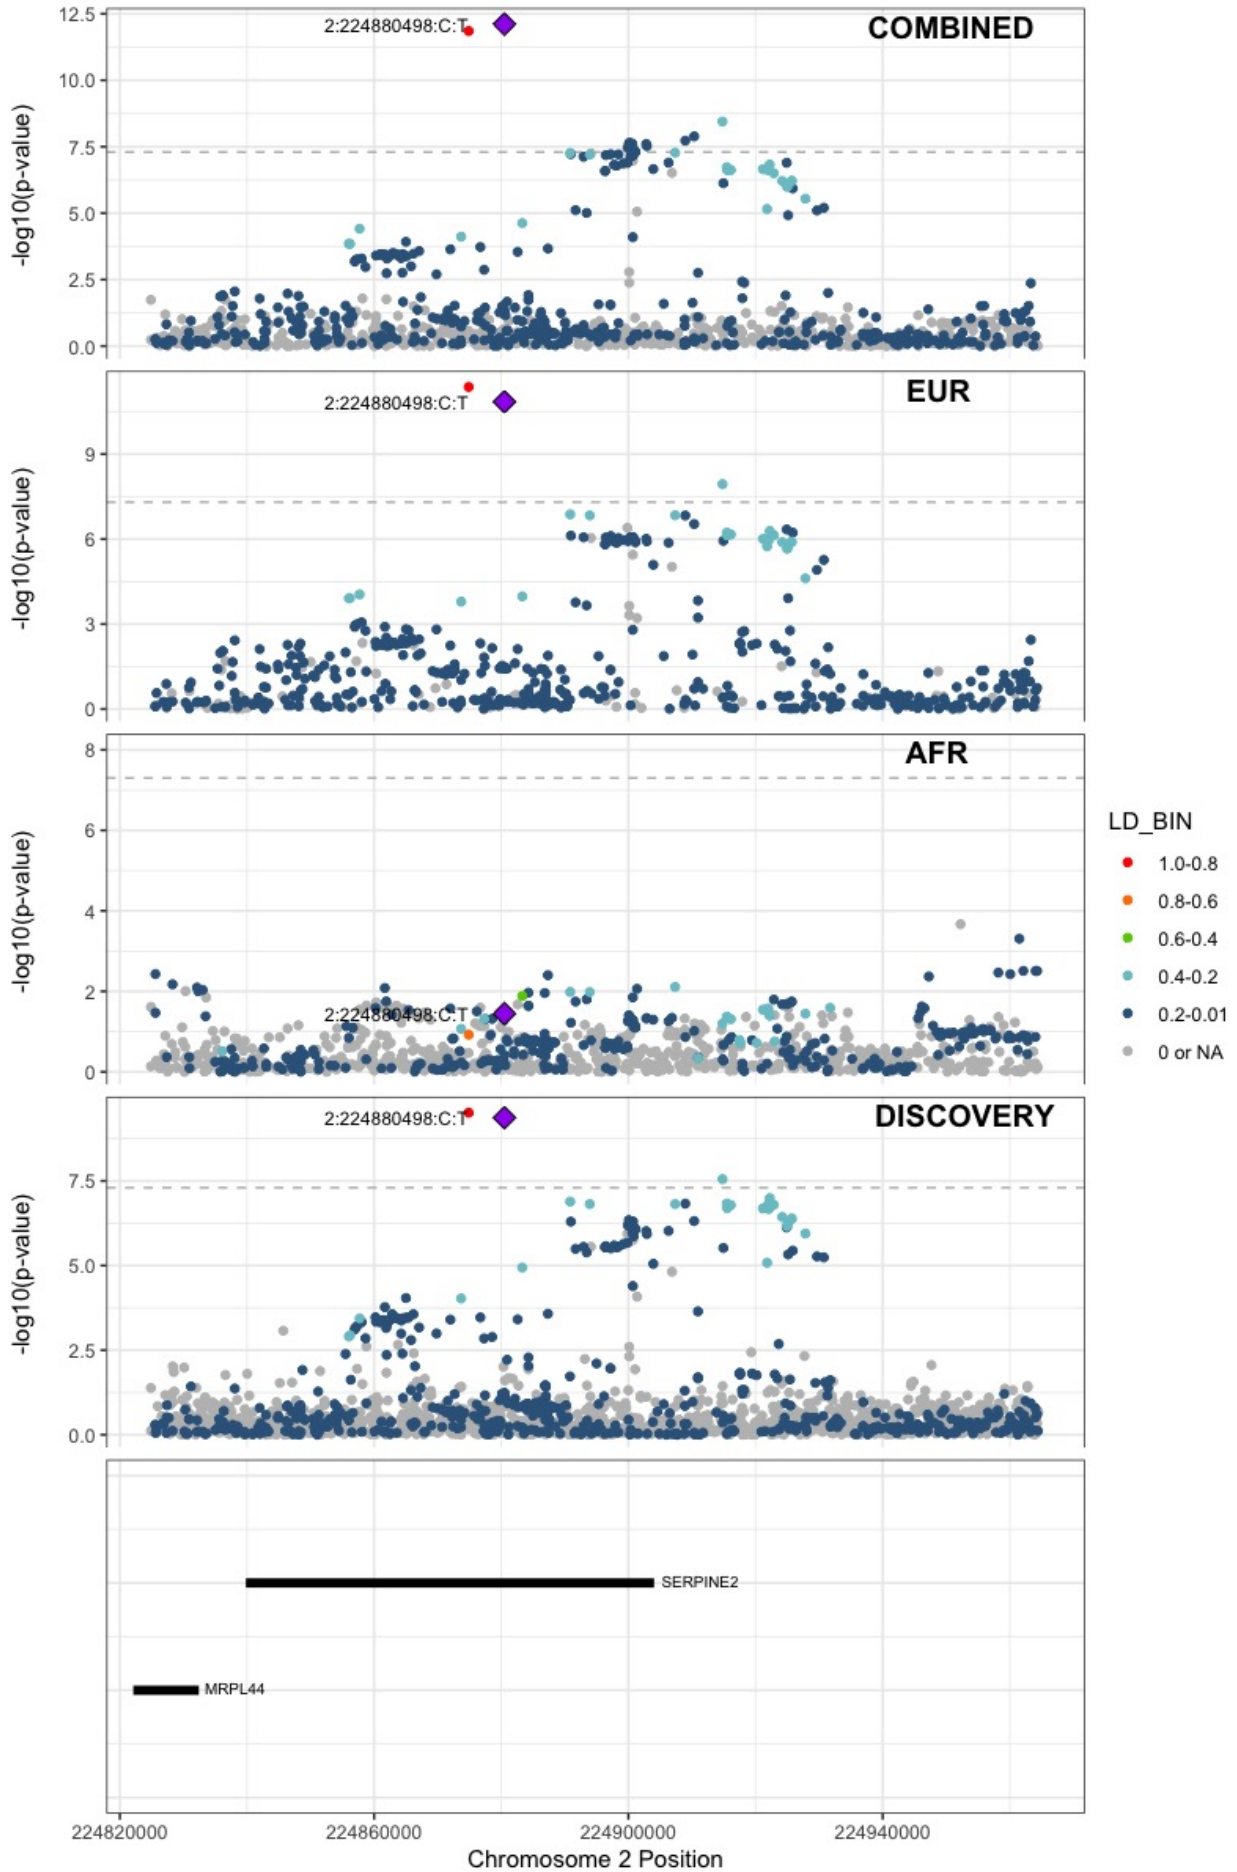

Supplementary Figure 6.21 – rs13084580 (chr3:39188182) in locus 24 (CSRNP1)

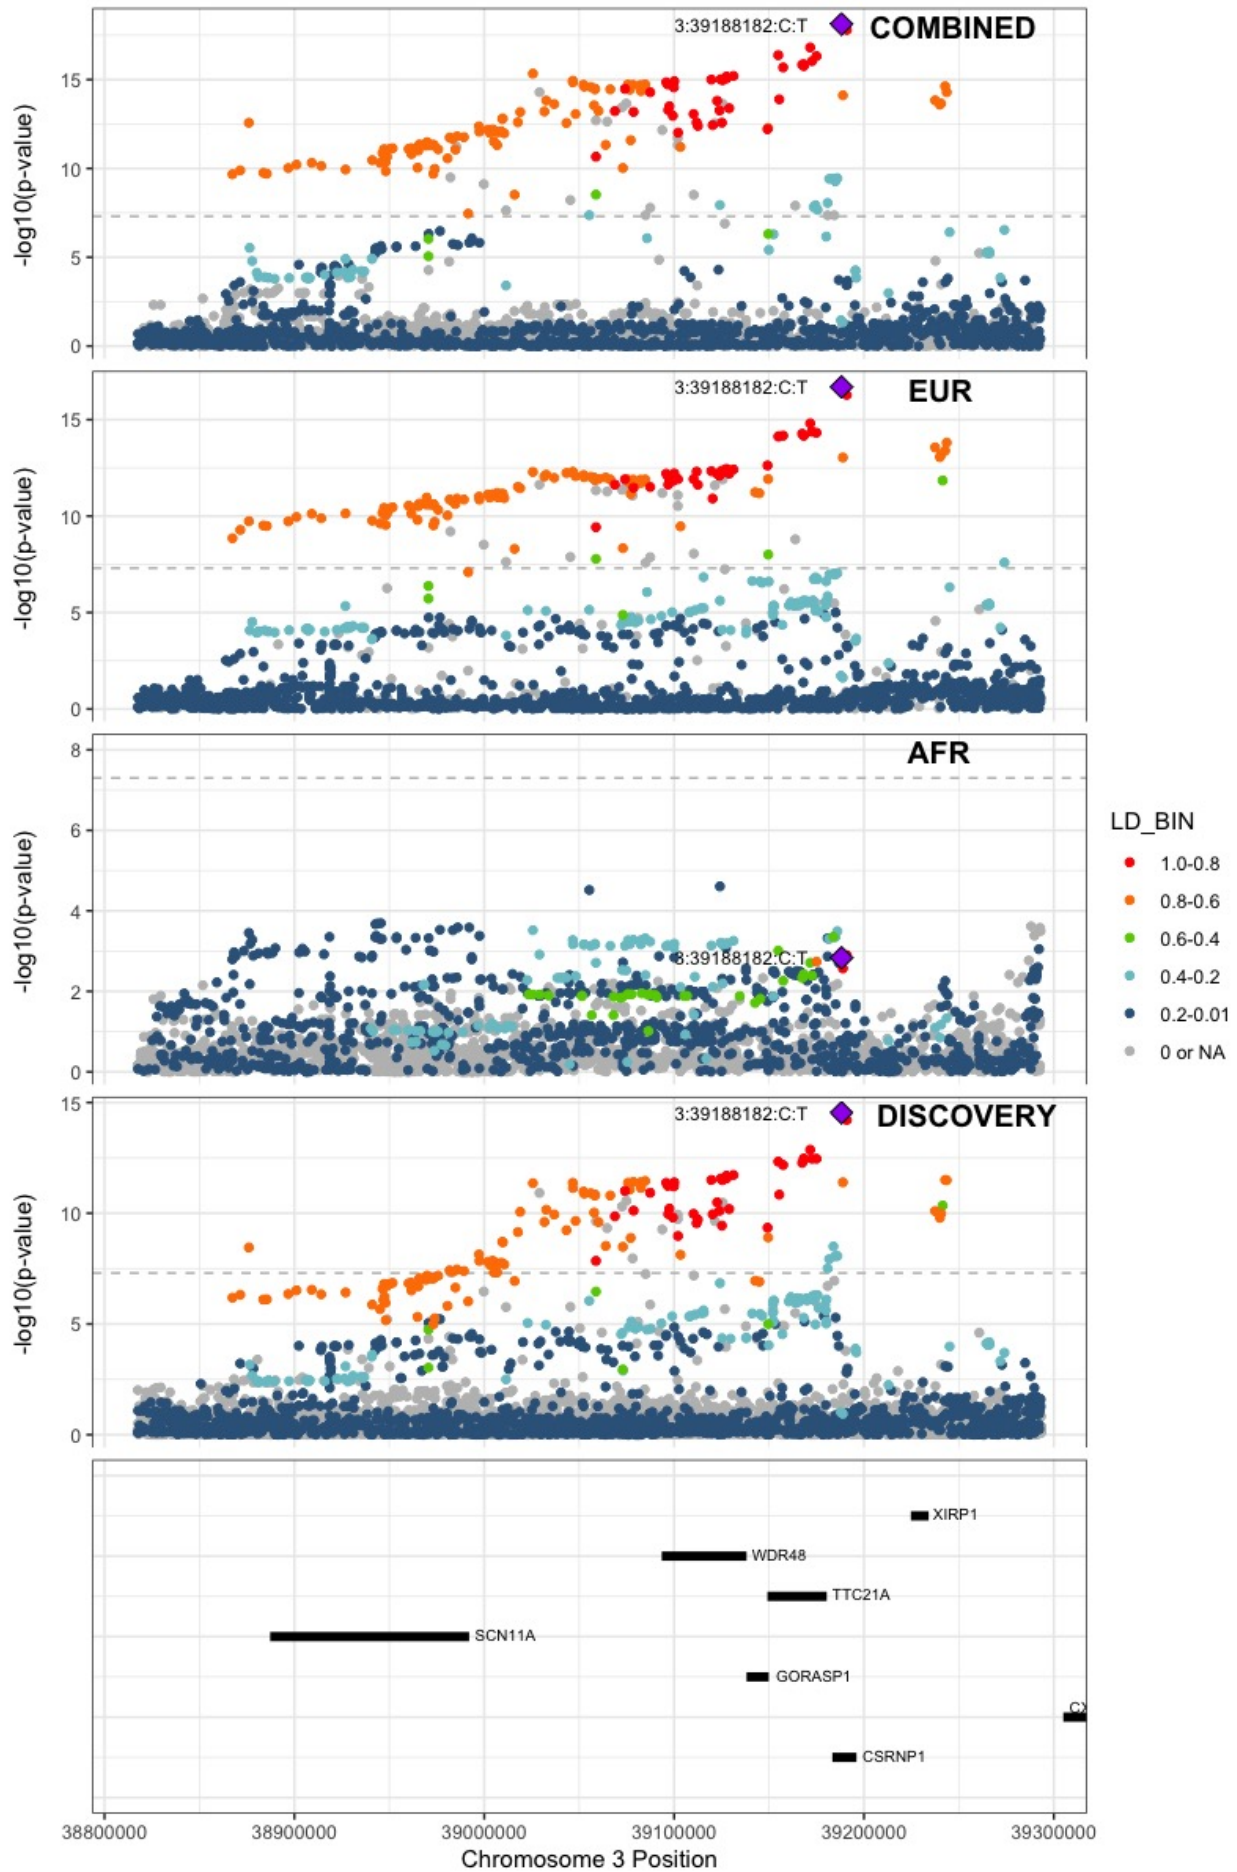



Supplementary Figure 6.22 – rs11130326 (chr3:52771920) in locus 25 (NEK4)

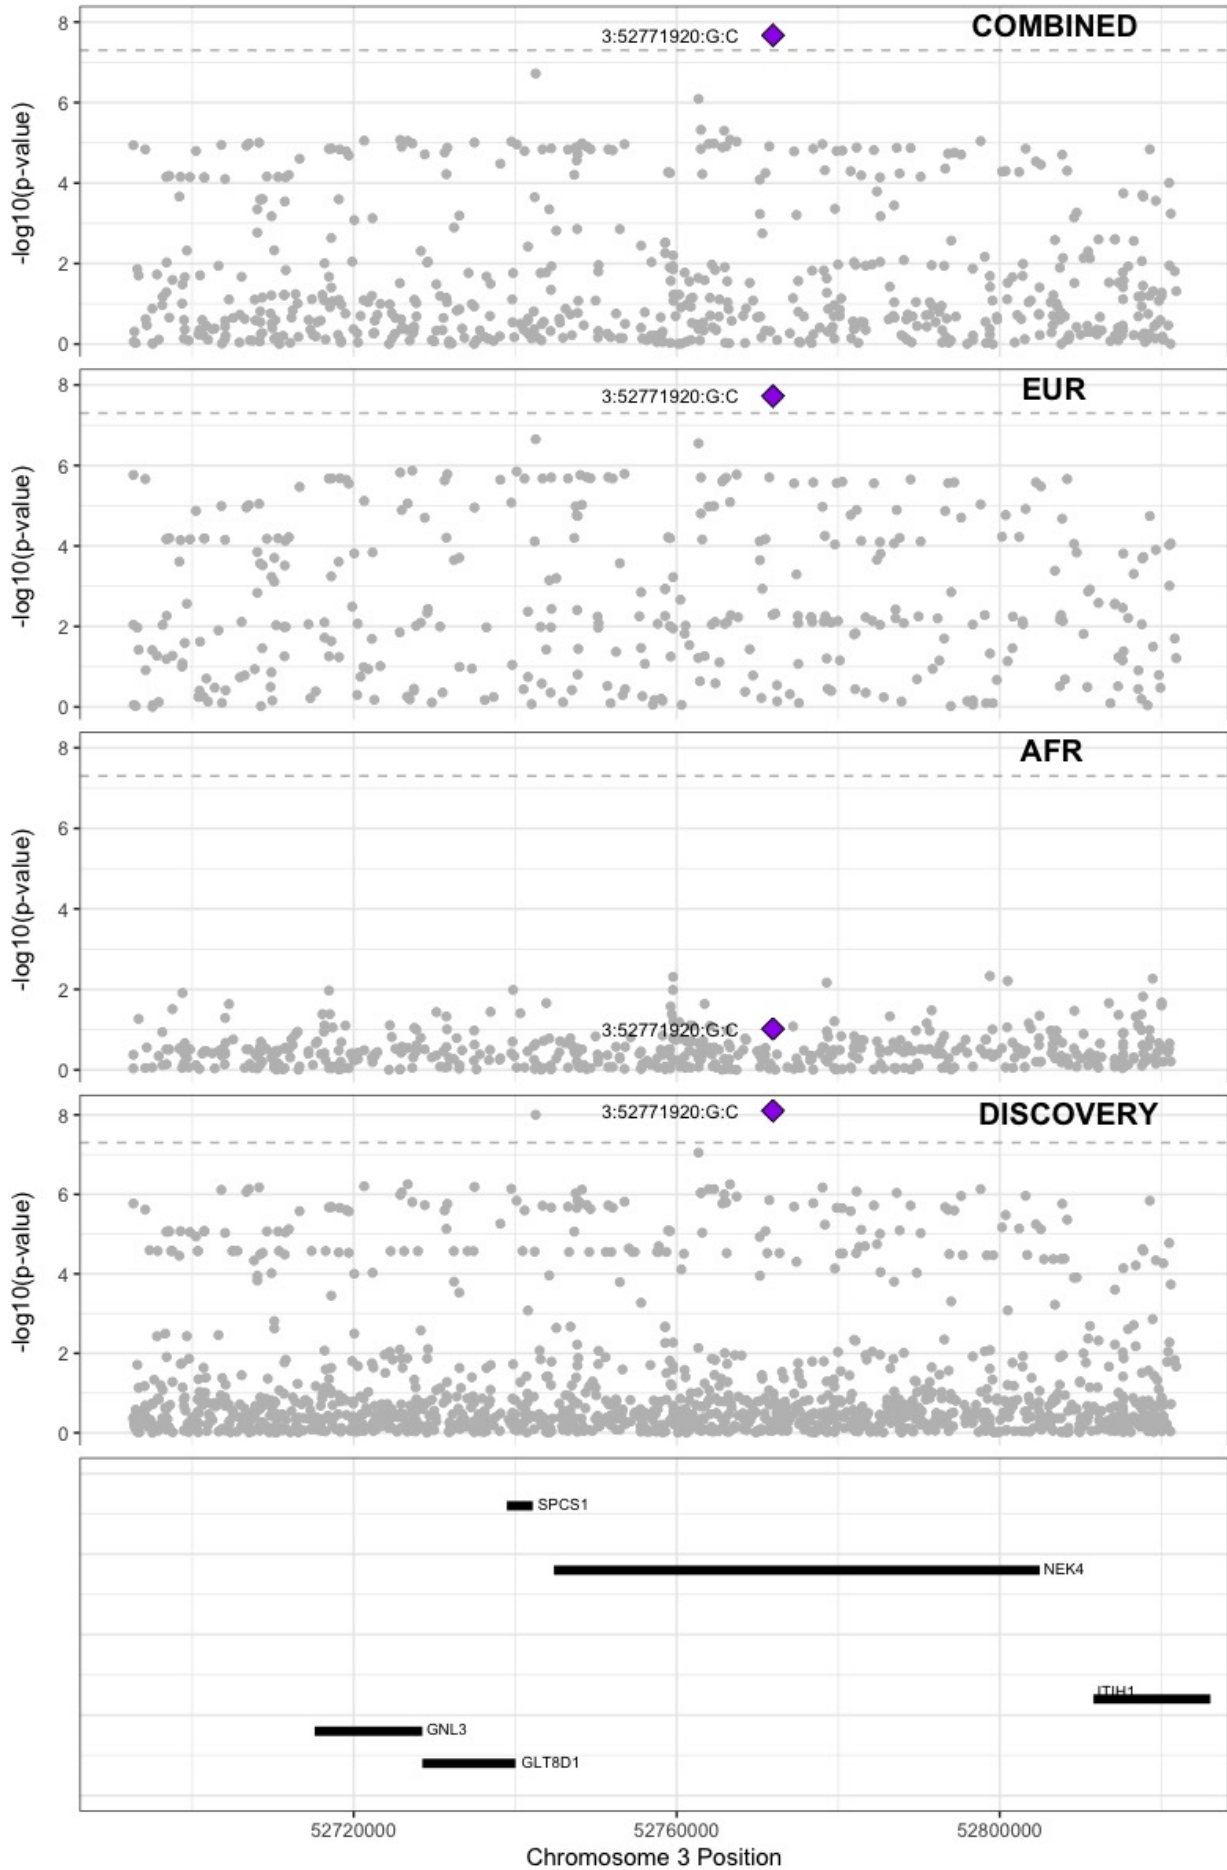

Supplementary Figure 6.23 – rs529326506 (chr3:90503764) in locus 26 (EPHA3;NONE)

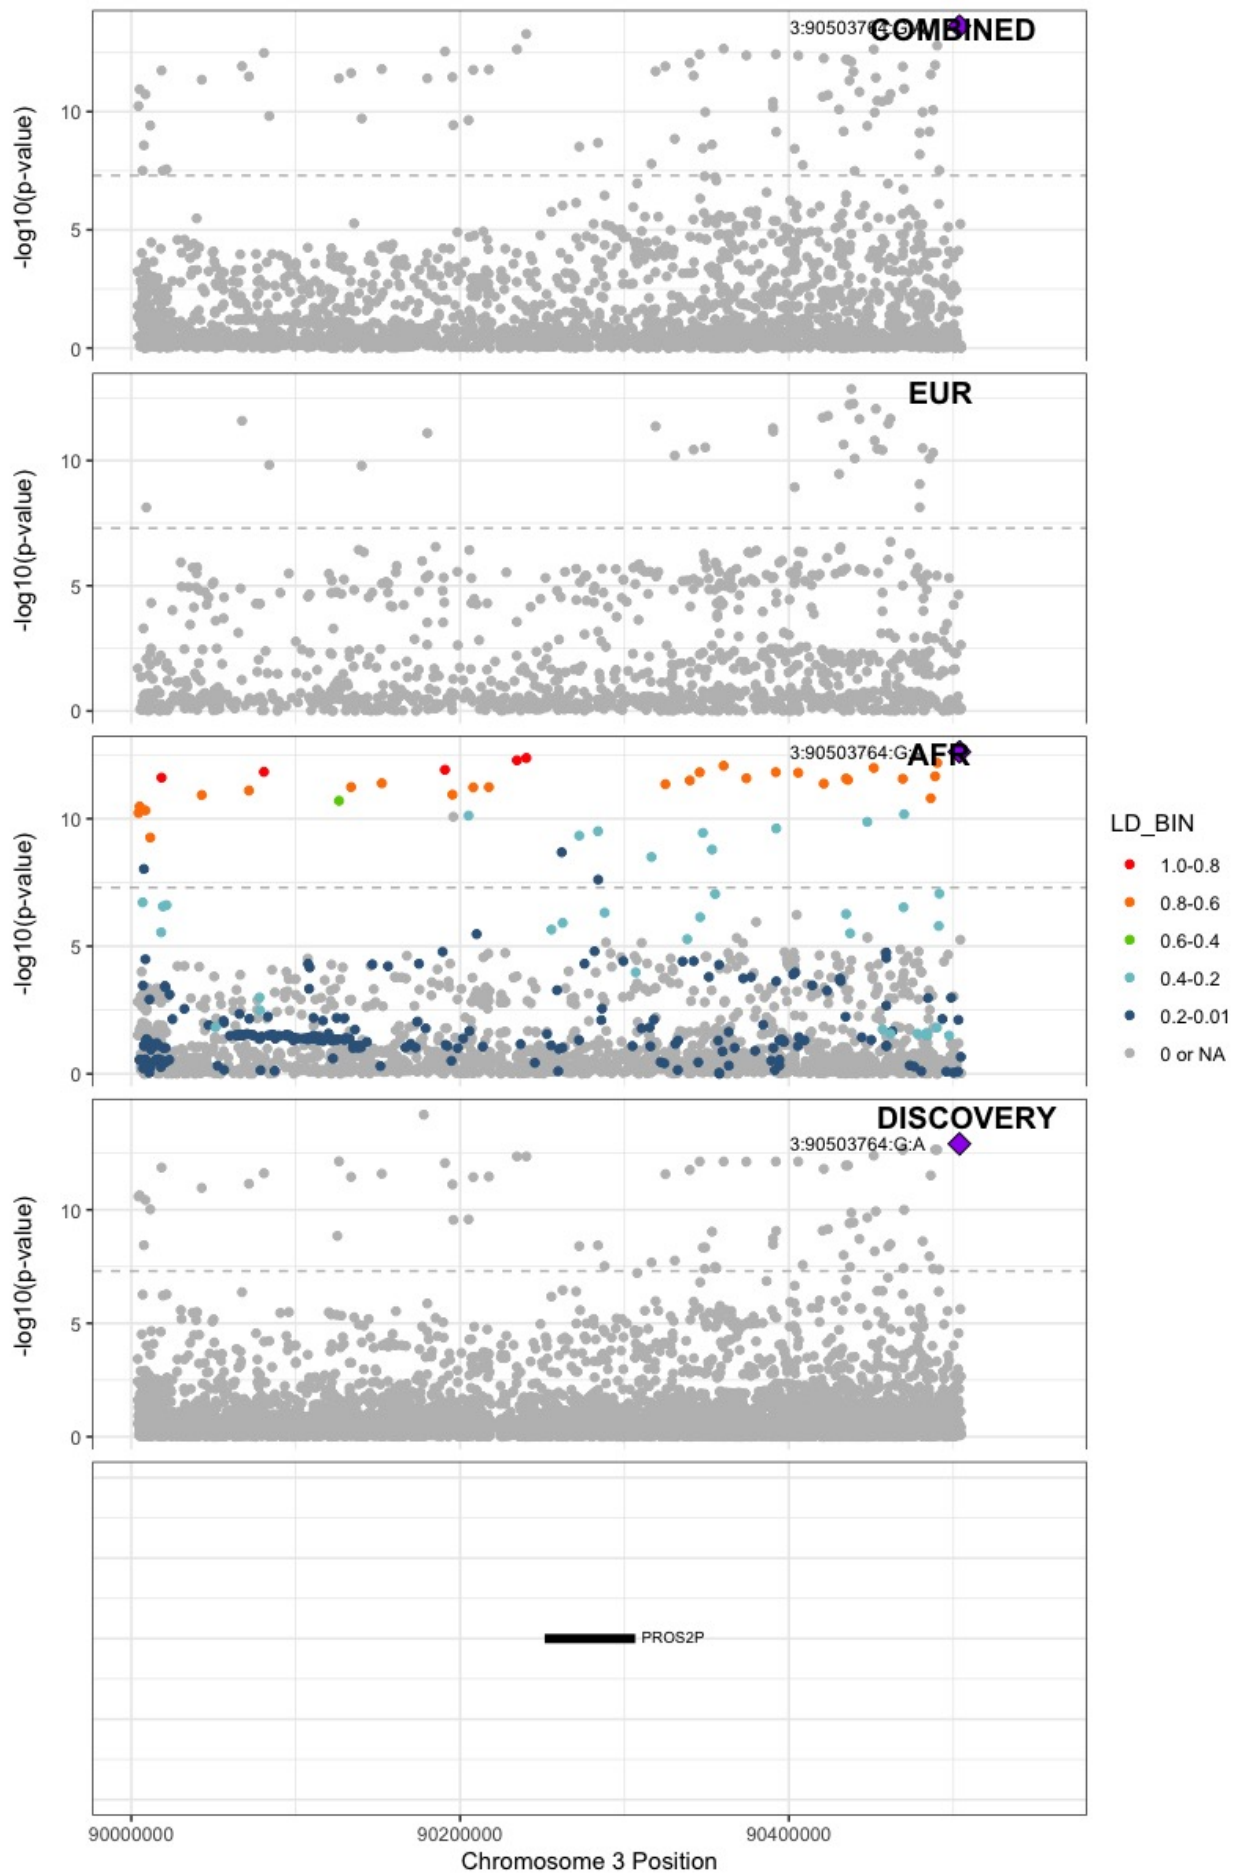

Supplementary Figure 6.24 – rs28479320 (chr3:93752529) in locus 27 (ARL13B)

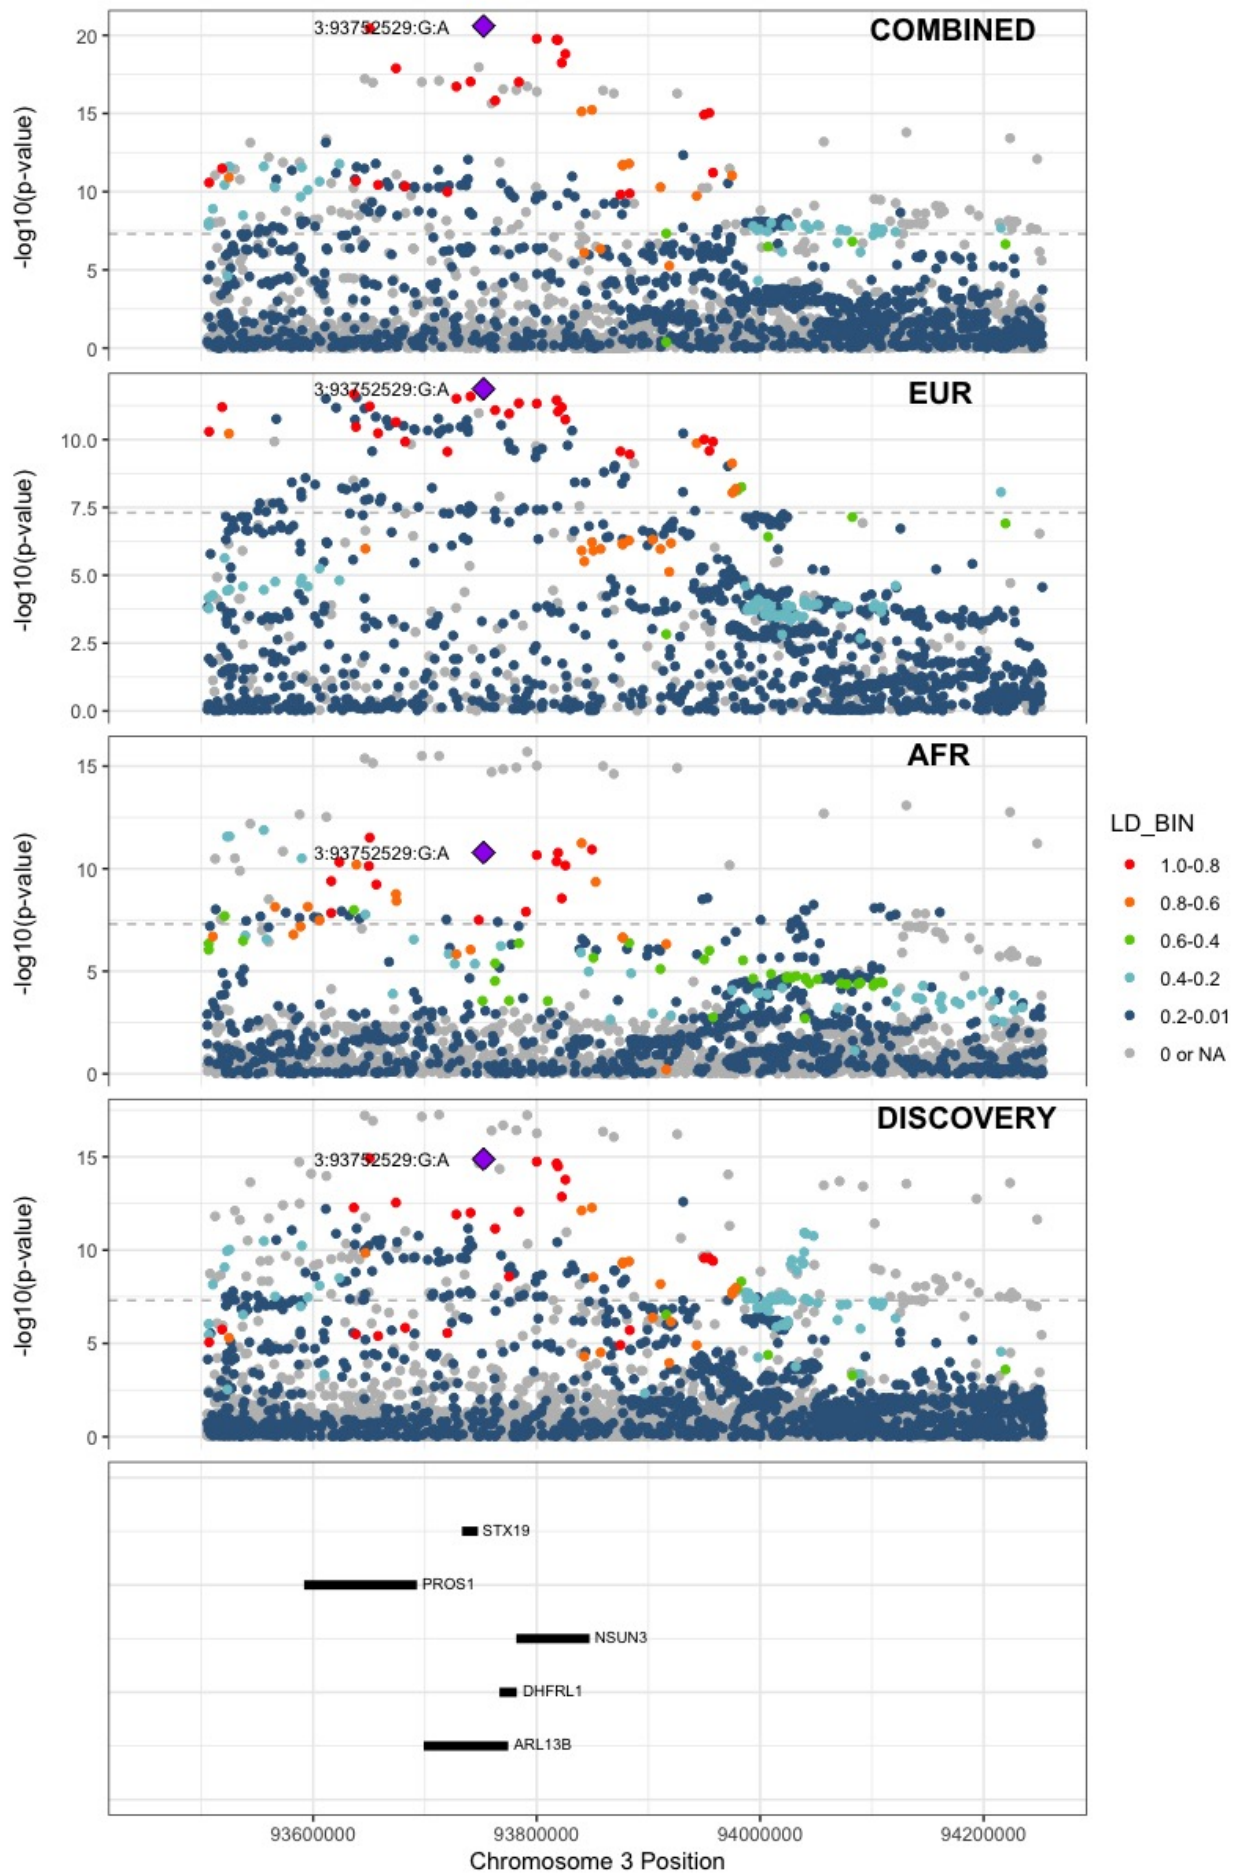

Supplementary Figure 6.25 – rs900399 (chr3:156798732) in locus 30 (LINC02029 ;LINC00880)

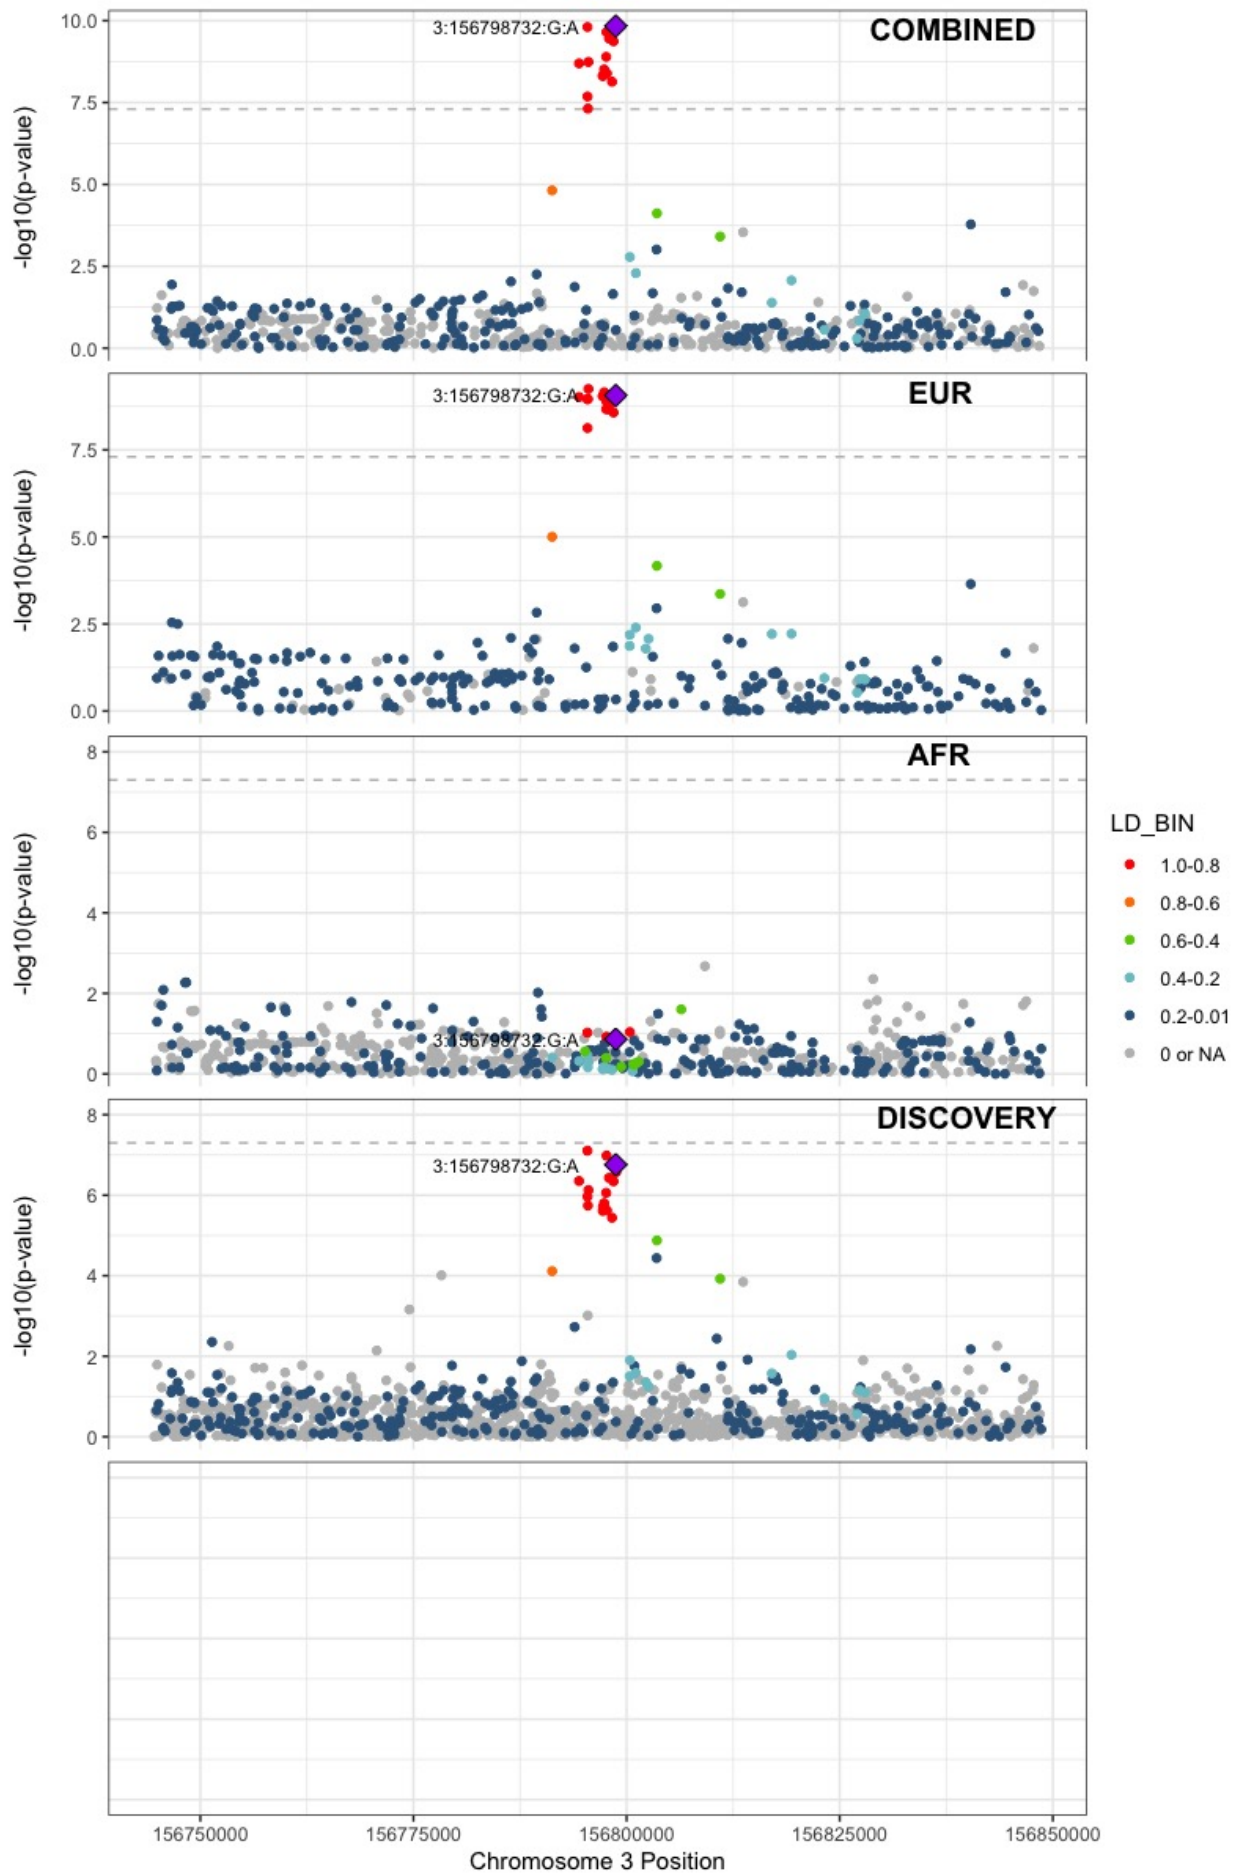

Supplementary Figure 6.26 – rs710446 (chr3:18645927) in locus 32 (KNG1)

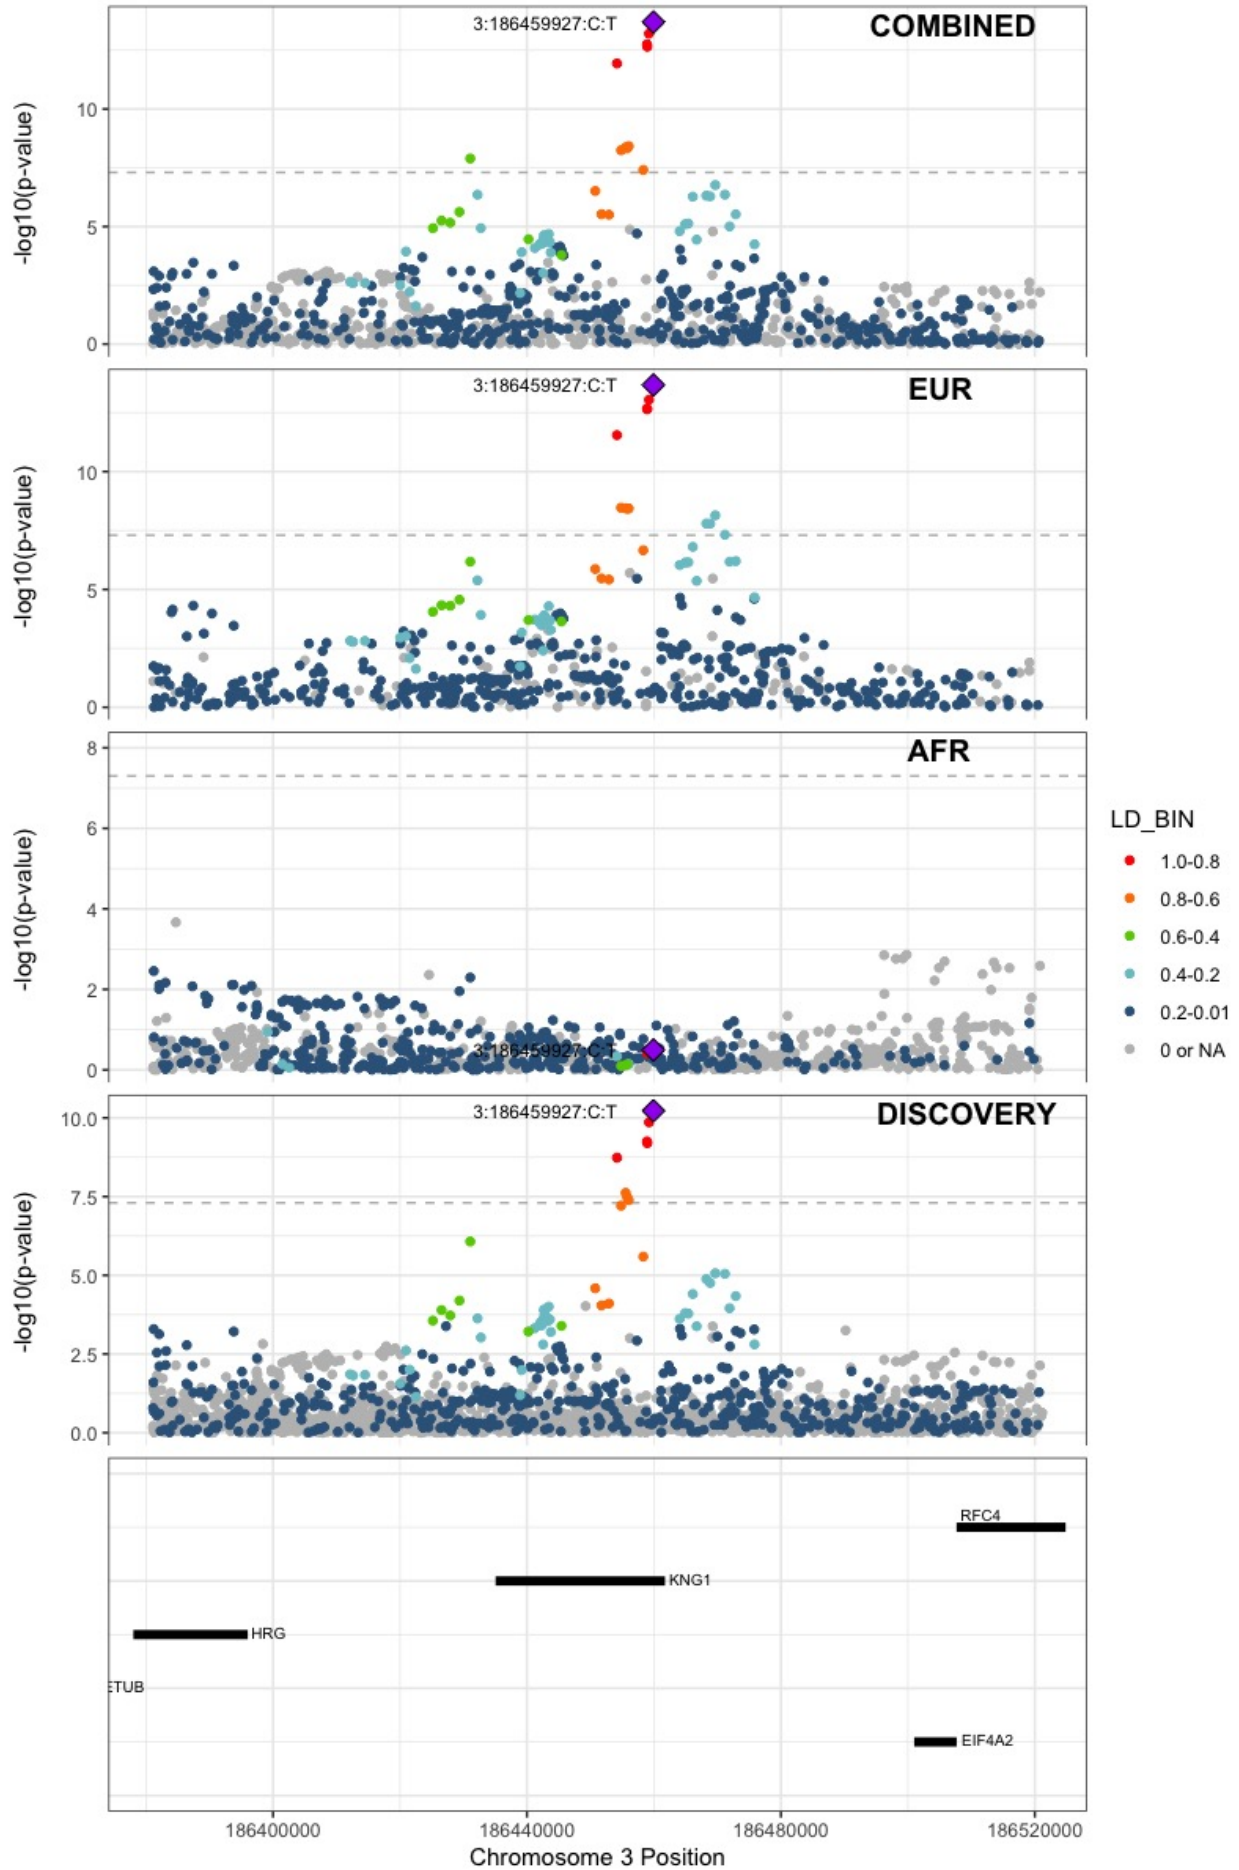

Supplementary Figure 6.27 – rs3796159 (chr3:194790434) in locus 33 (XXYLT1)

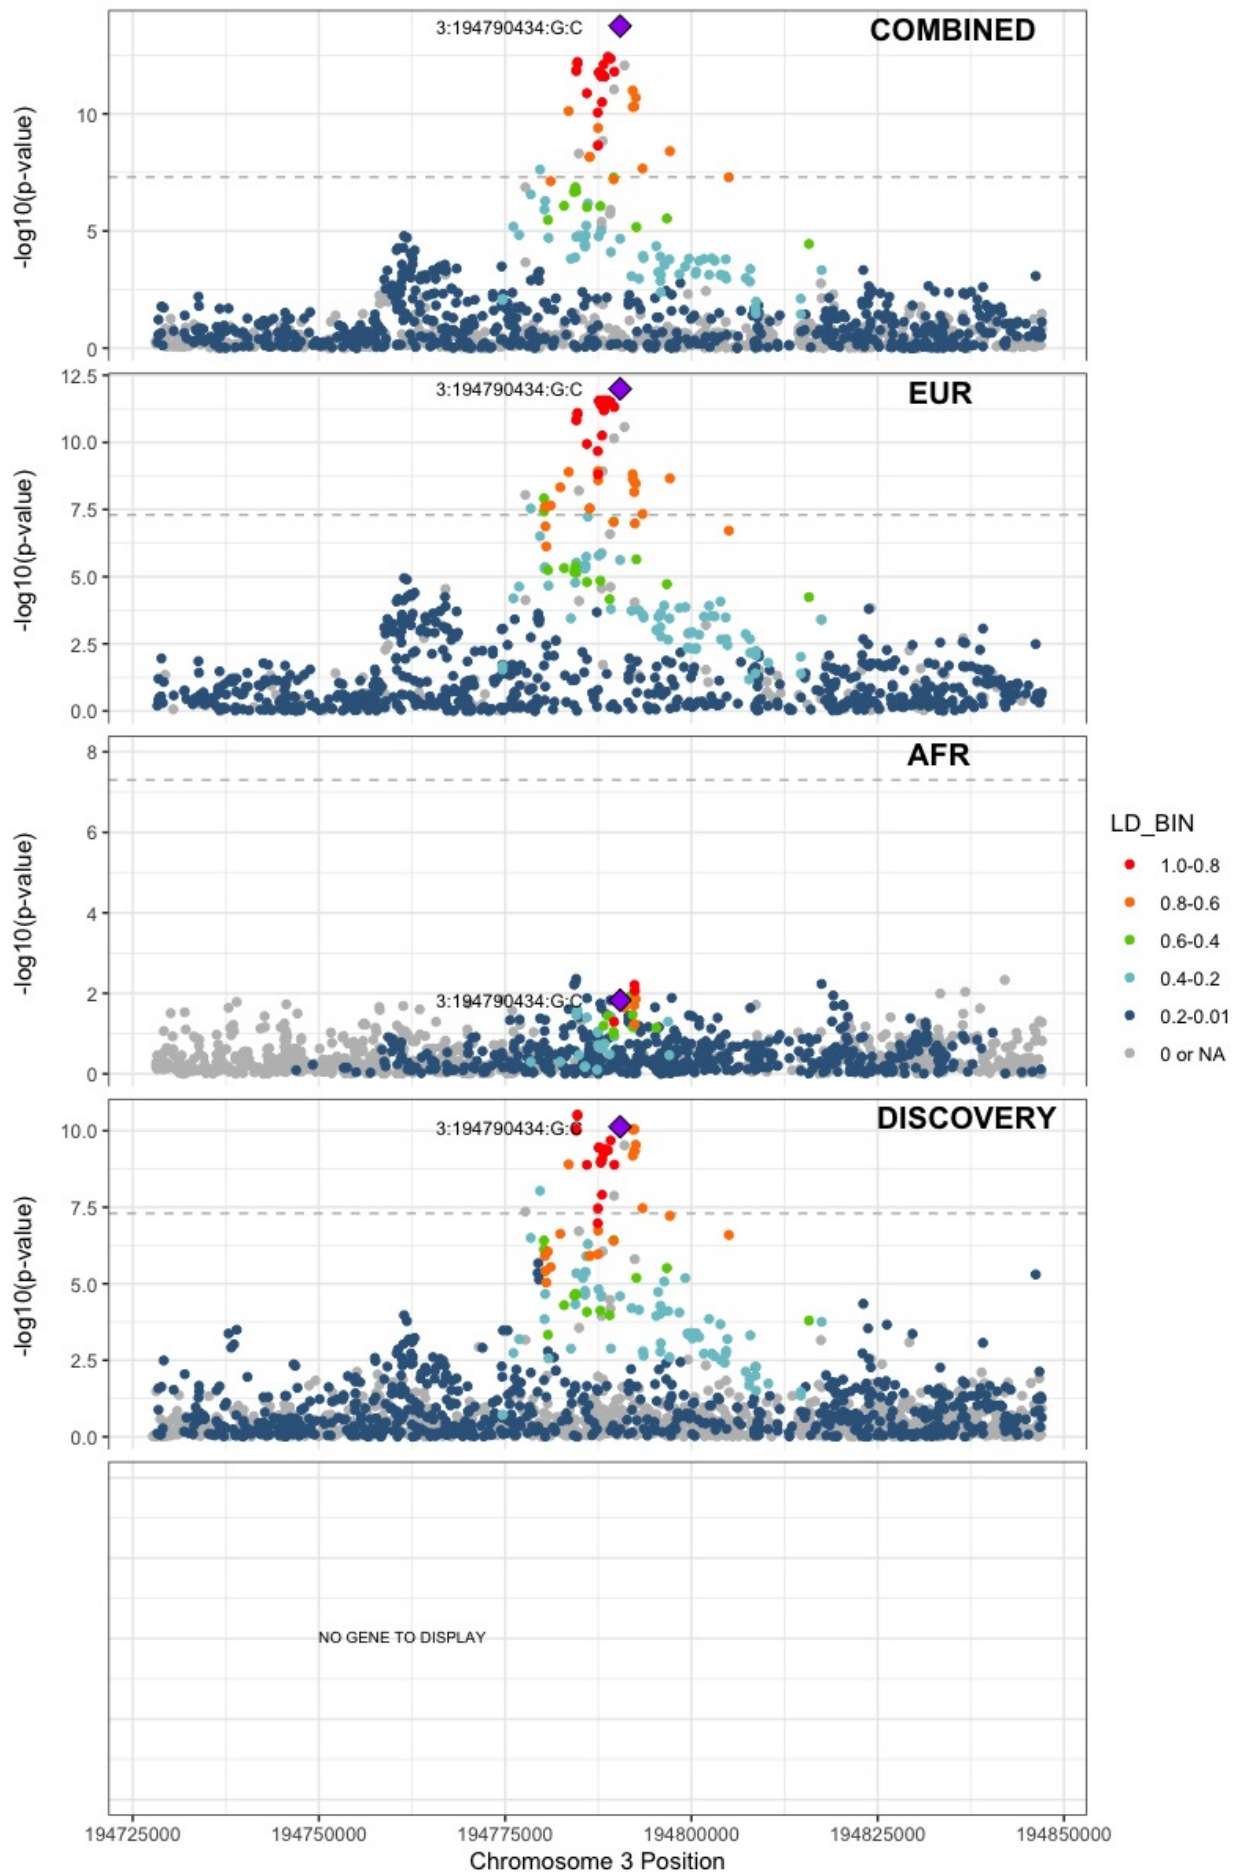

Supplementary Figure 6.28 – rs9654093 (chr4:7903763) in locus 34 (AFAP1)

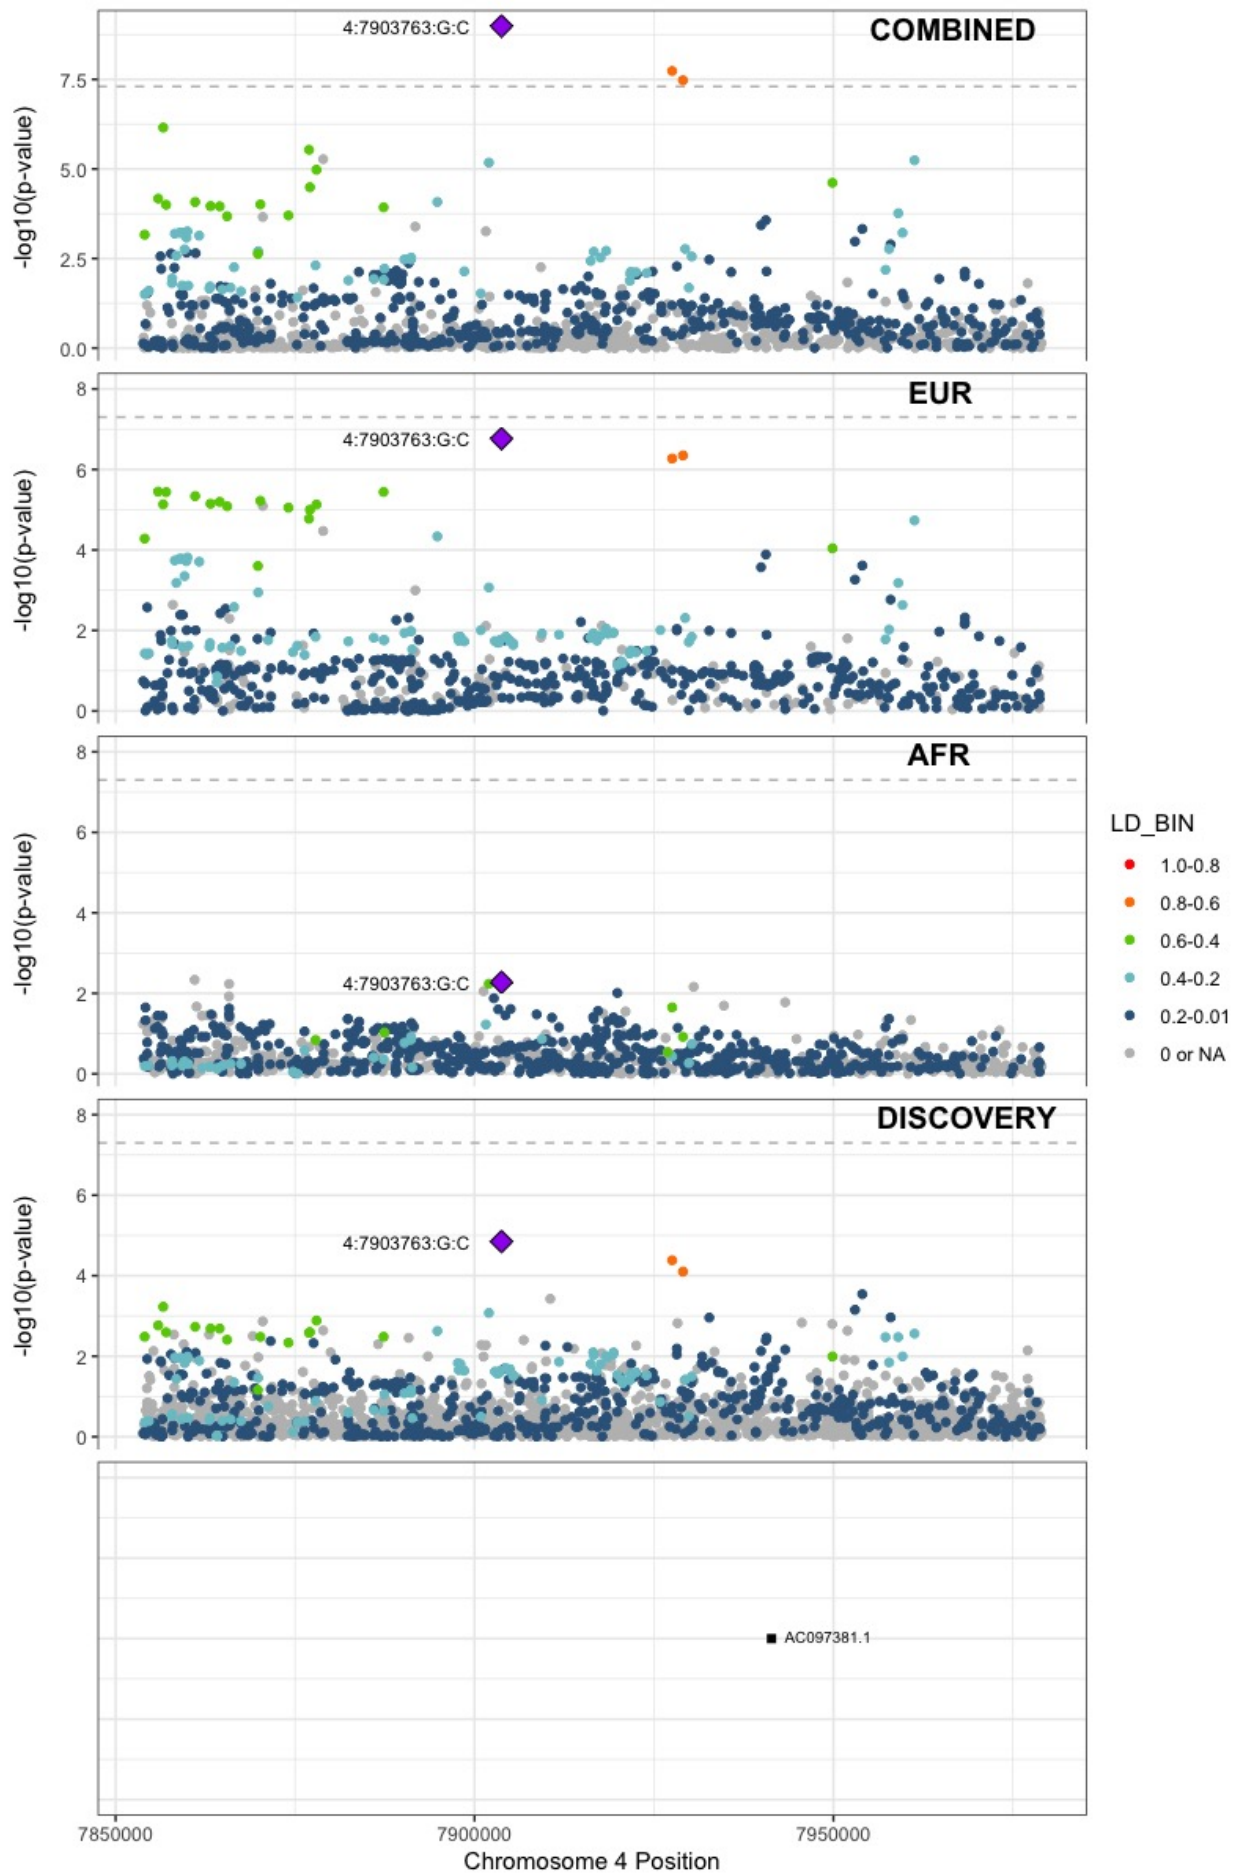

Supplementary Figure 6.29 – rs781656 (chr4:57778645) in locus 35 (REST)

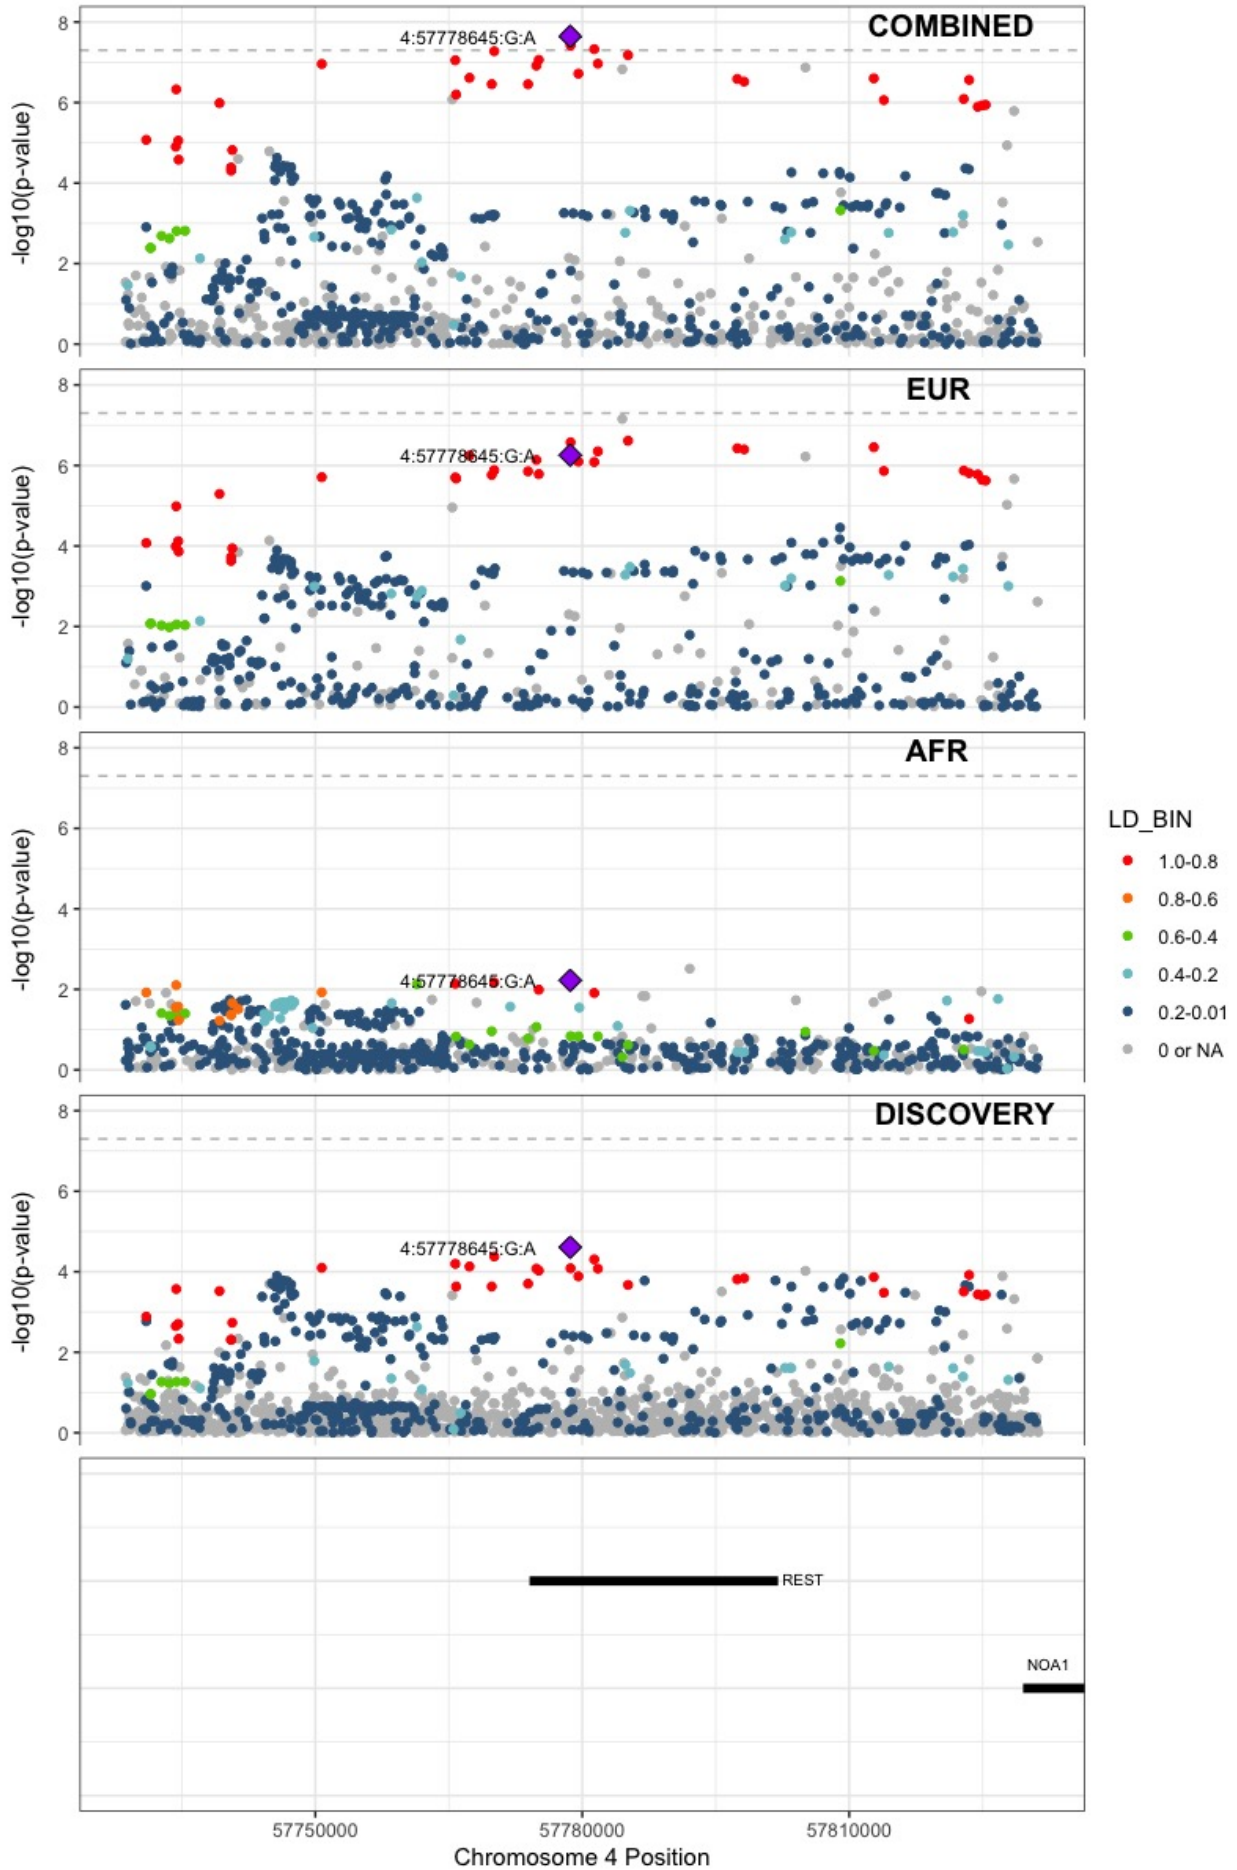



Supplementary Figure 6.30 – rs6826579 (chr4:83785031) in locus 36 (SEC31A)

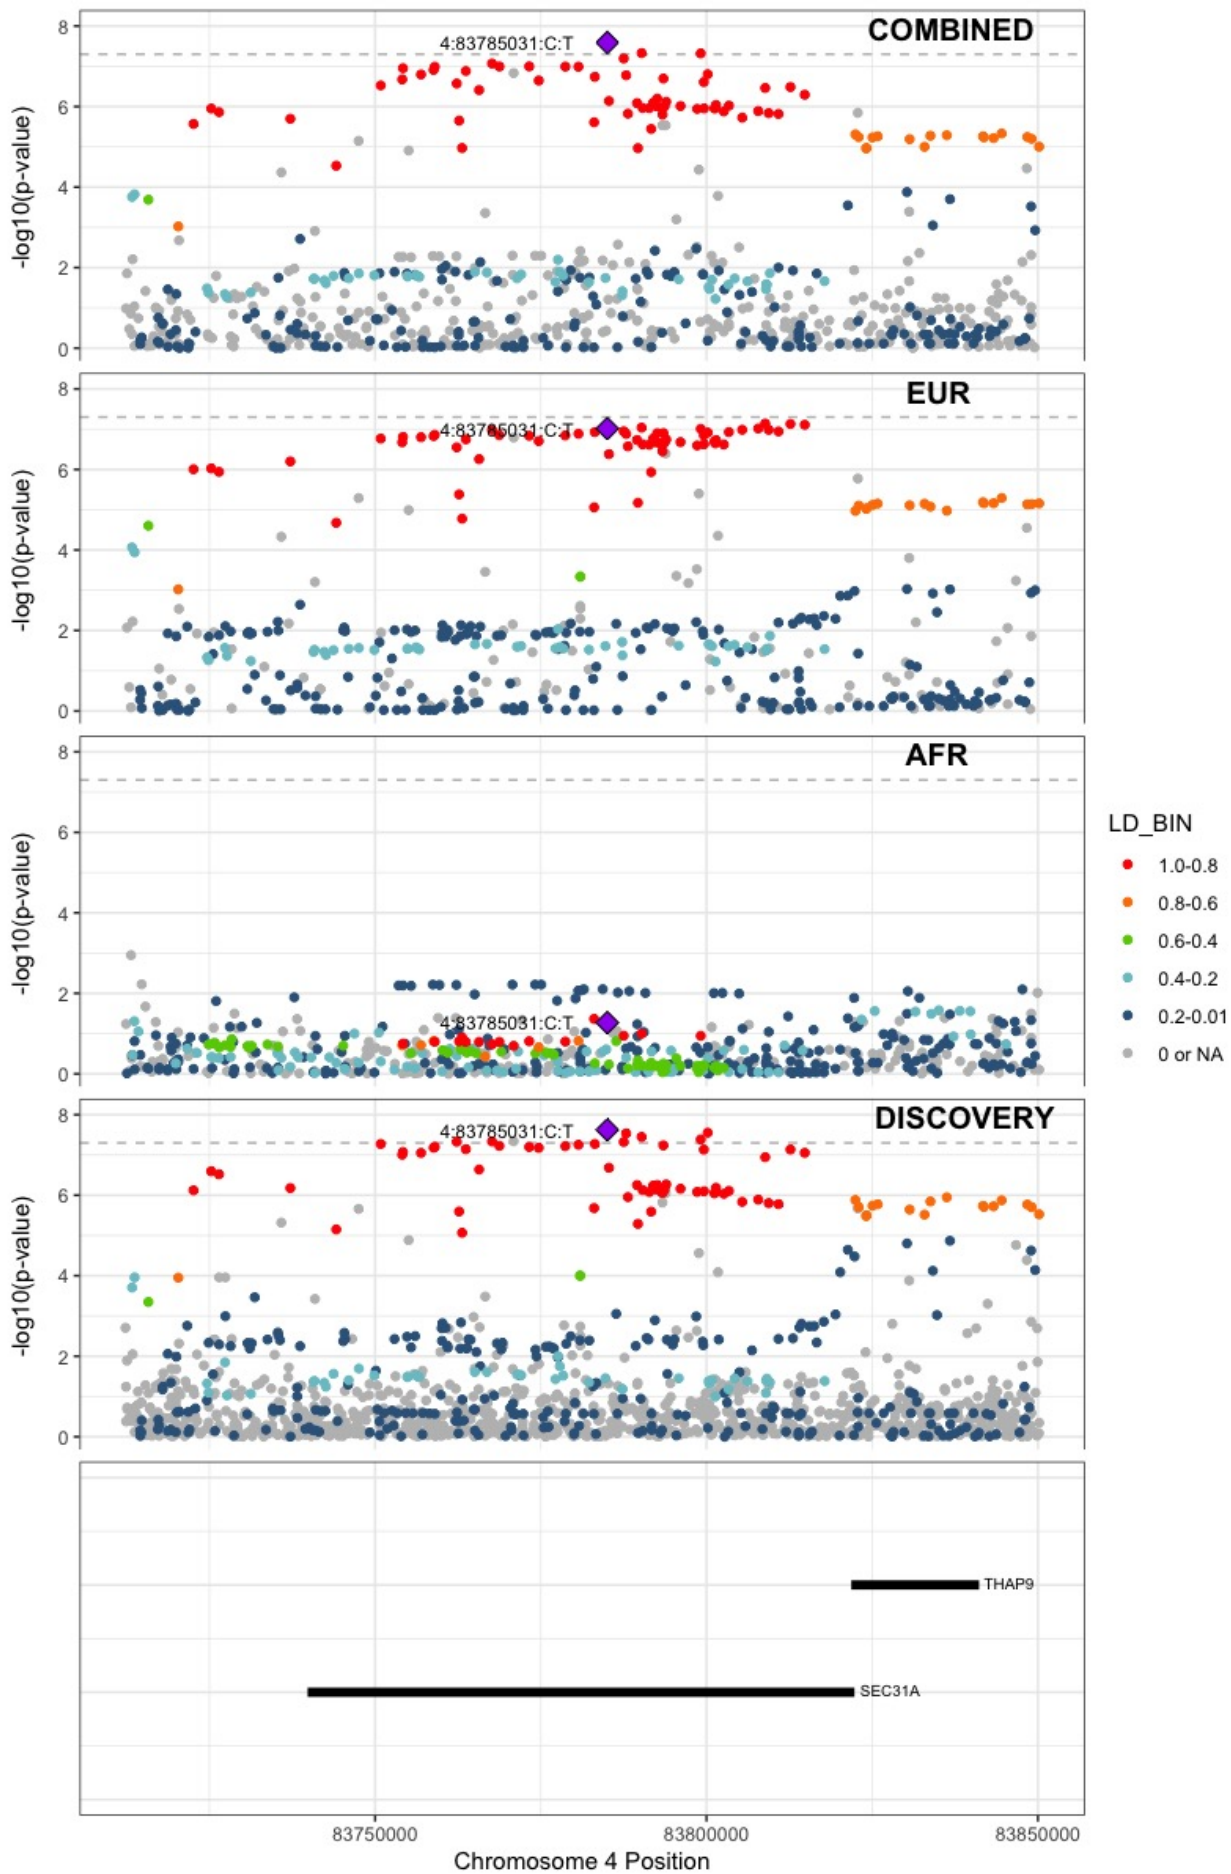

Supplementary Figure 6.31 – rs2014912 (chr4:86715670) in locus 37 (ARHGAP24)

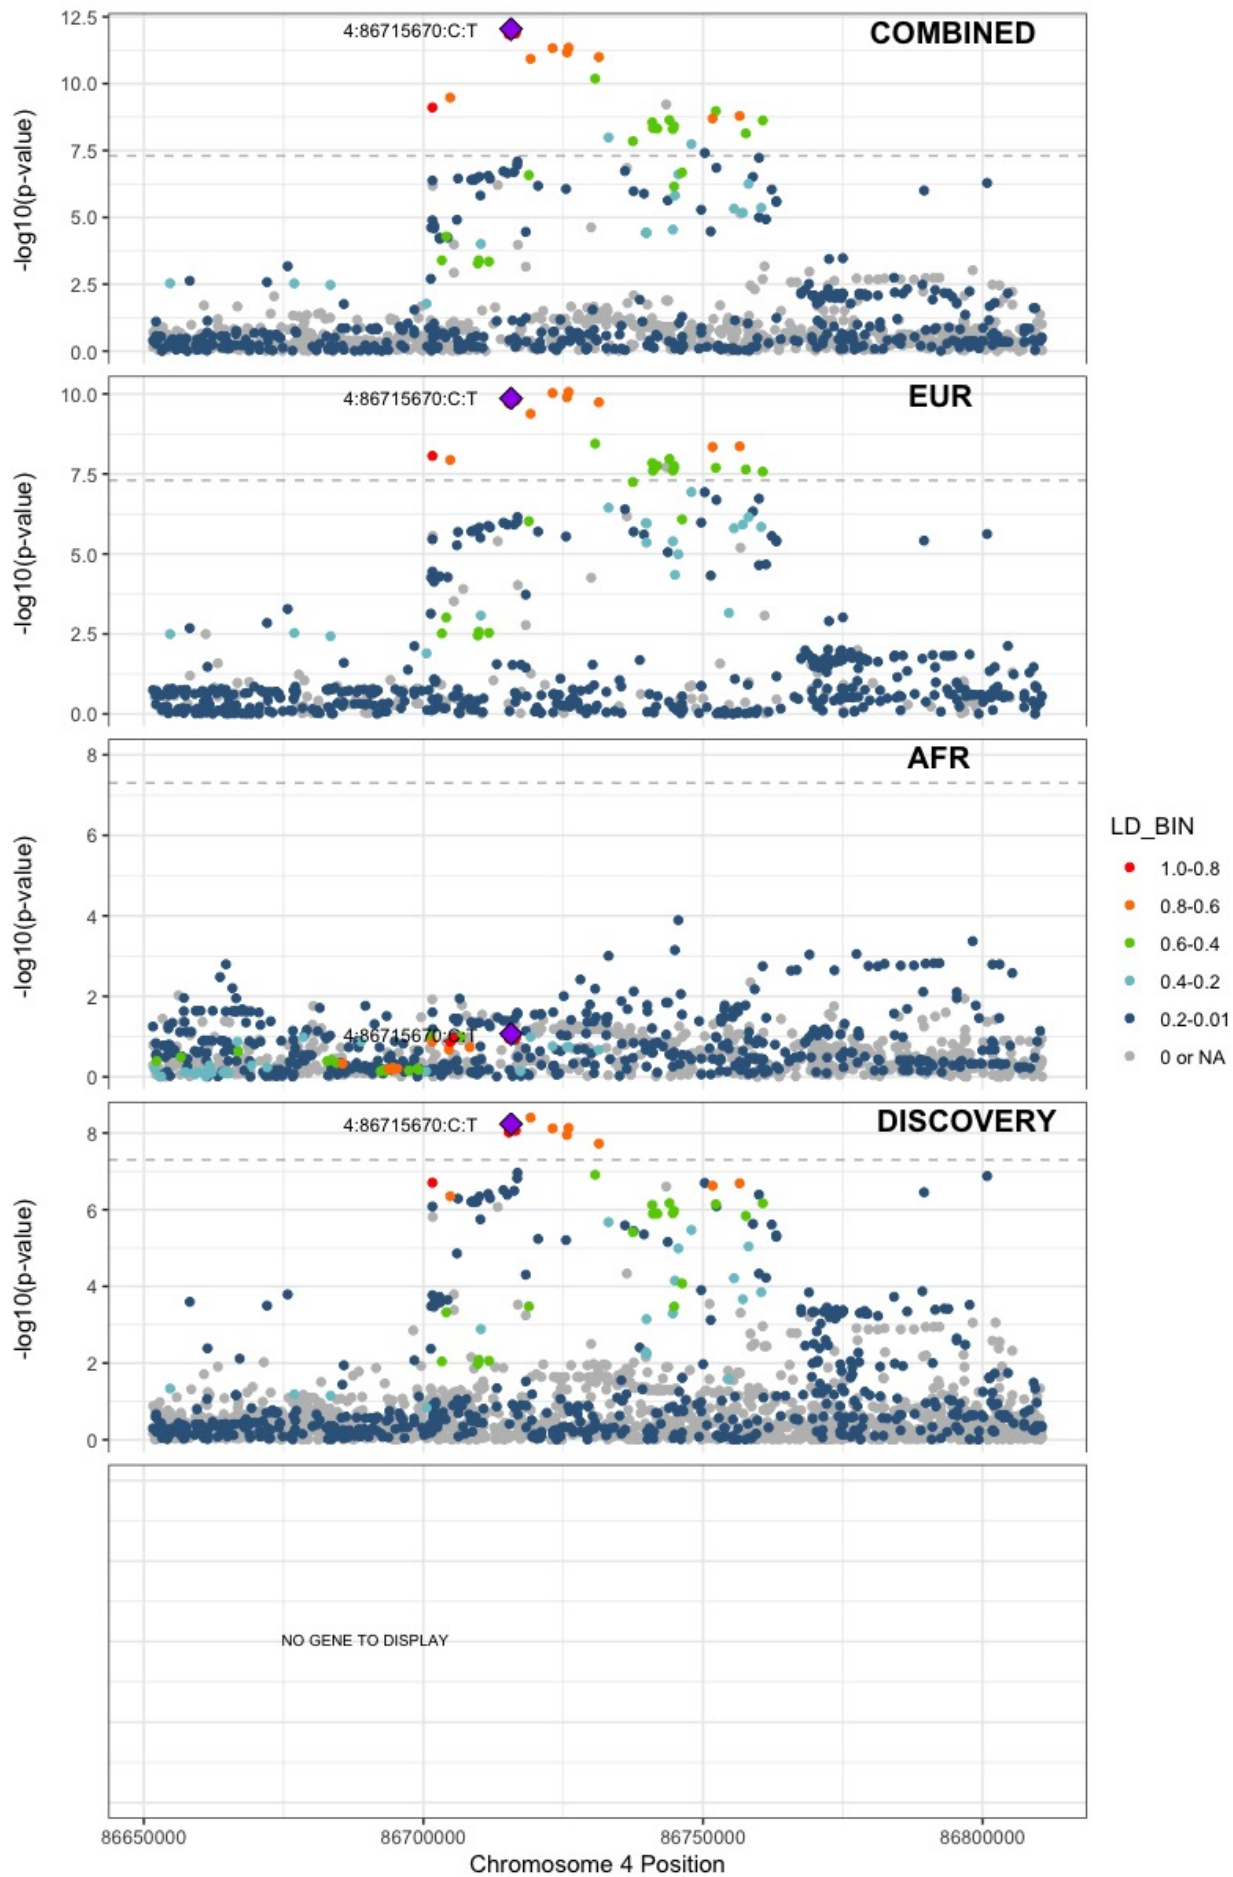

Supplementary Figure 6.32 – rs2066864 (chr4:155525695) in locus 39 (FGG)

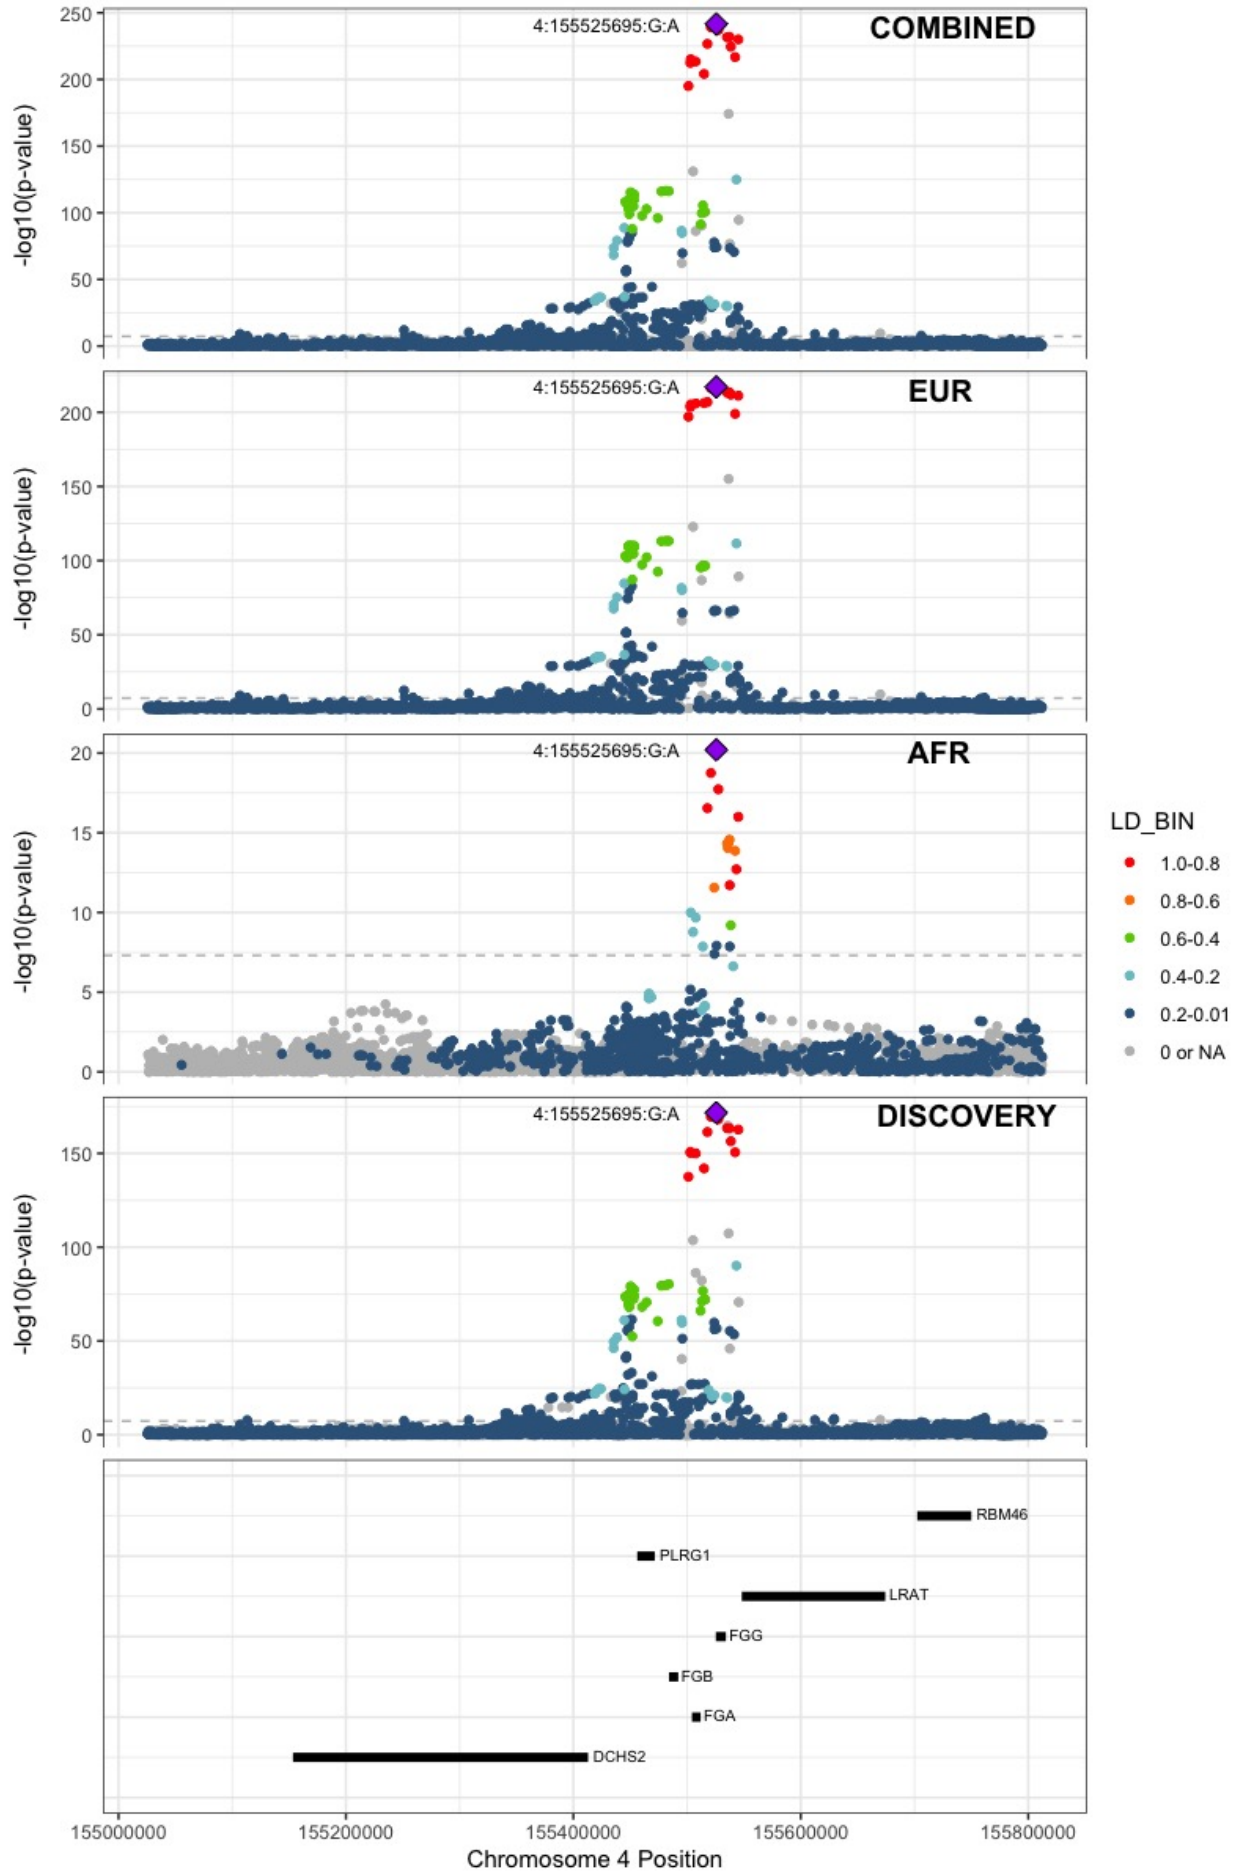

Supplementary Figure 6.33 – rs3756011 (chr4:187206249) in locus 40 (F11)

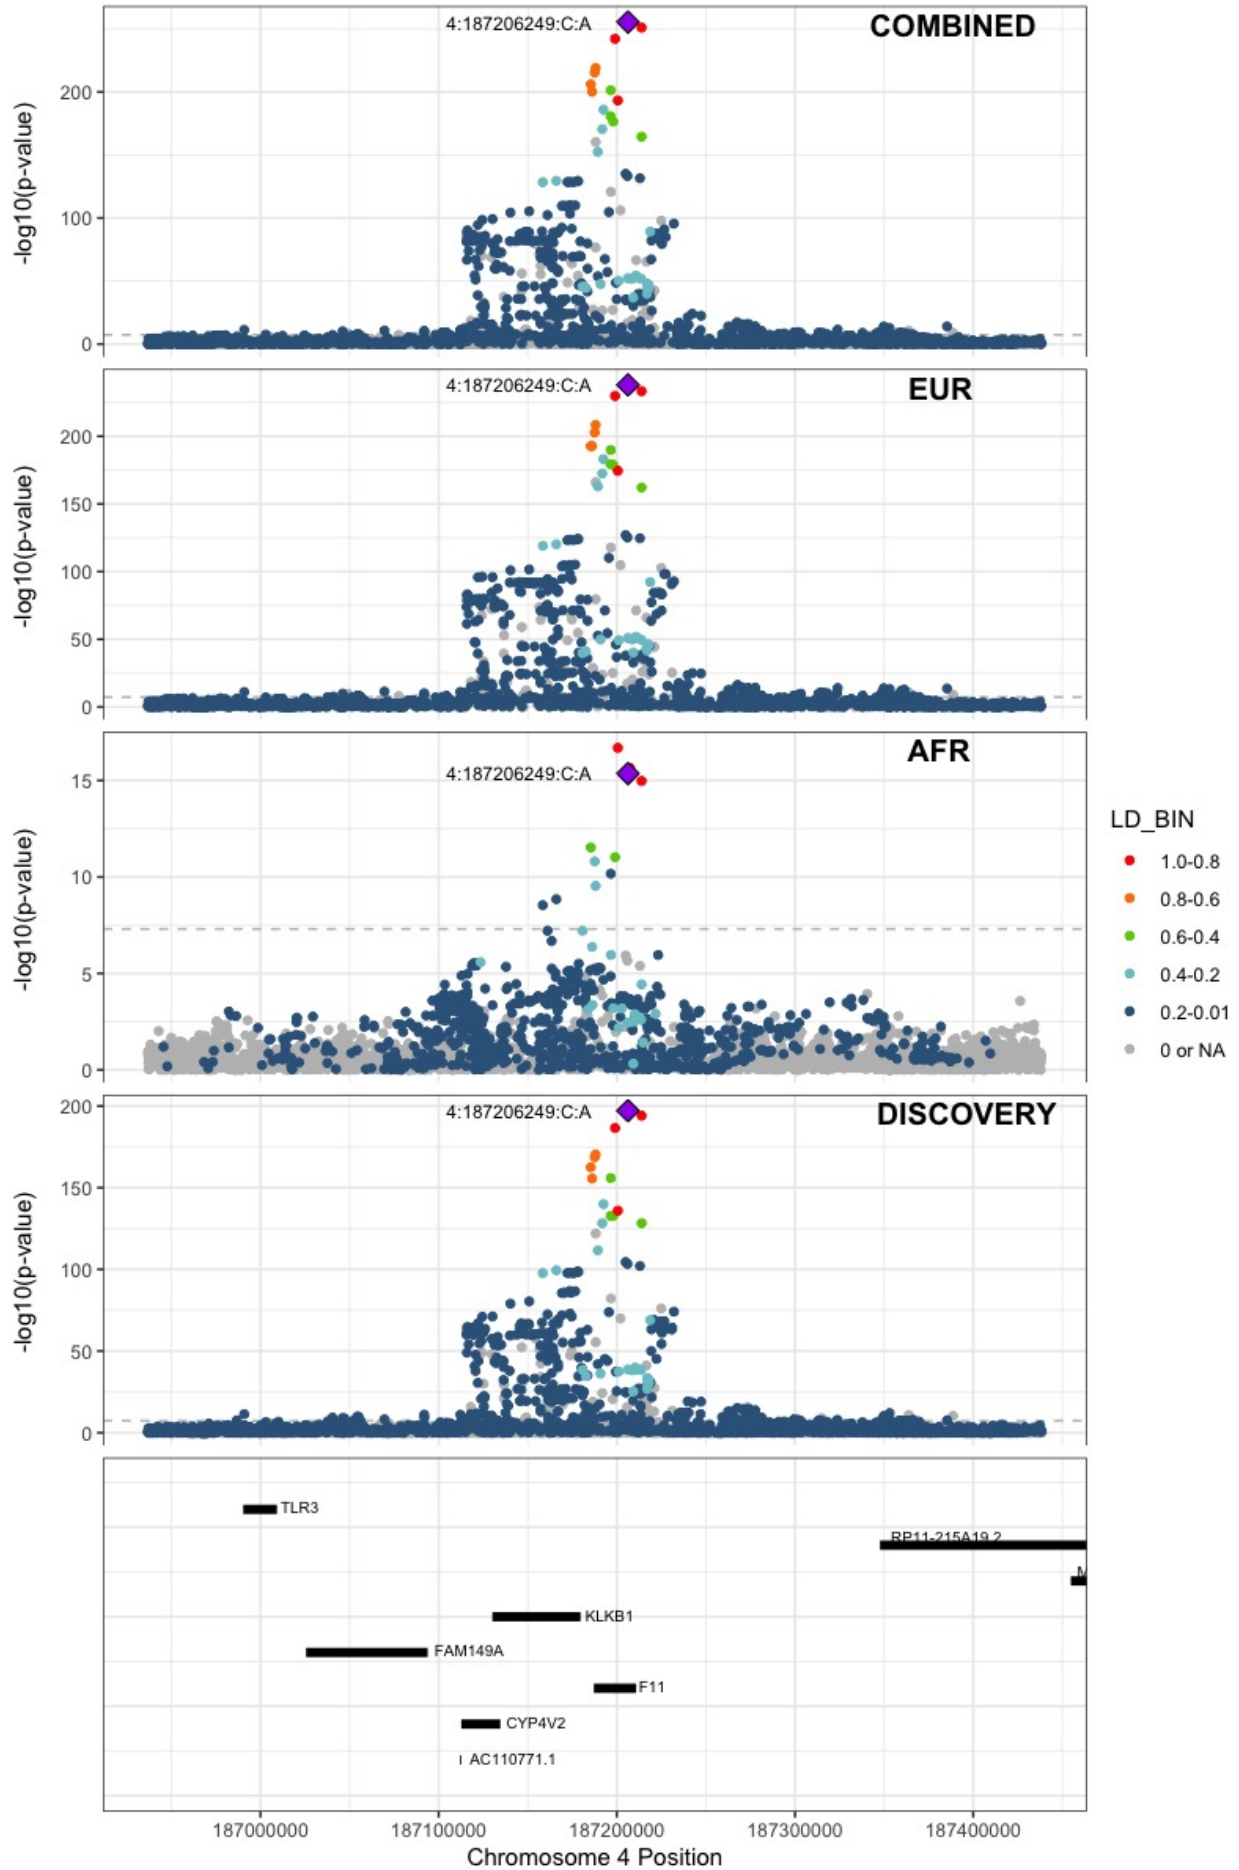

Supplementary Figure 6.34 – rs16867574 (chr5:38708554) in locus 42 (OSMR-AS1)

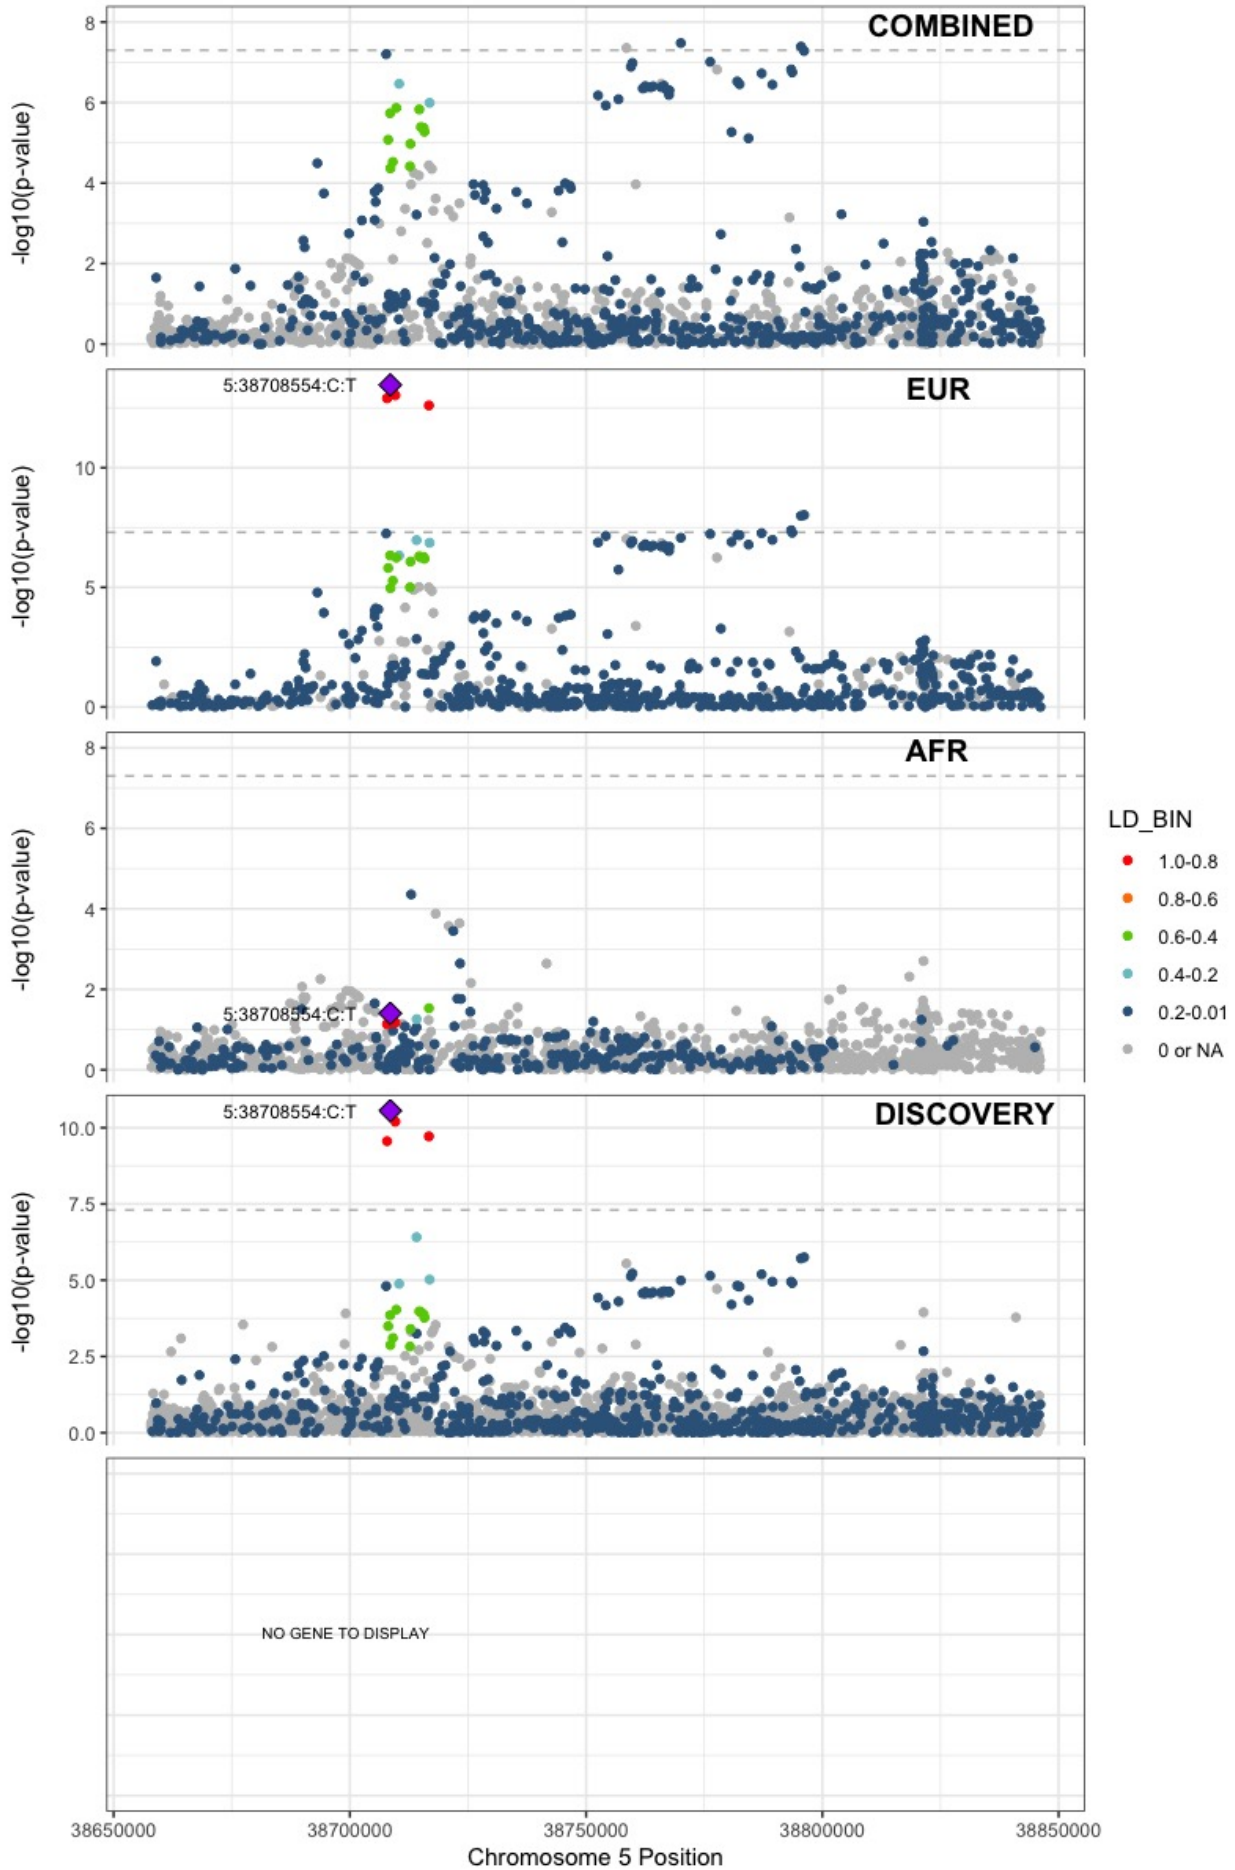

Supplementary Figure 6.35 – rs7730244 (chr5:72957088) in locus 43 (ARHGEF28)

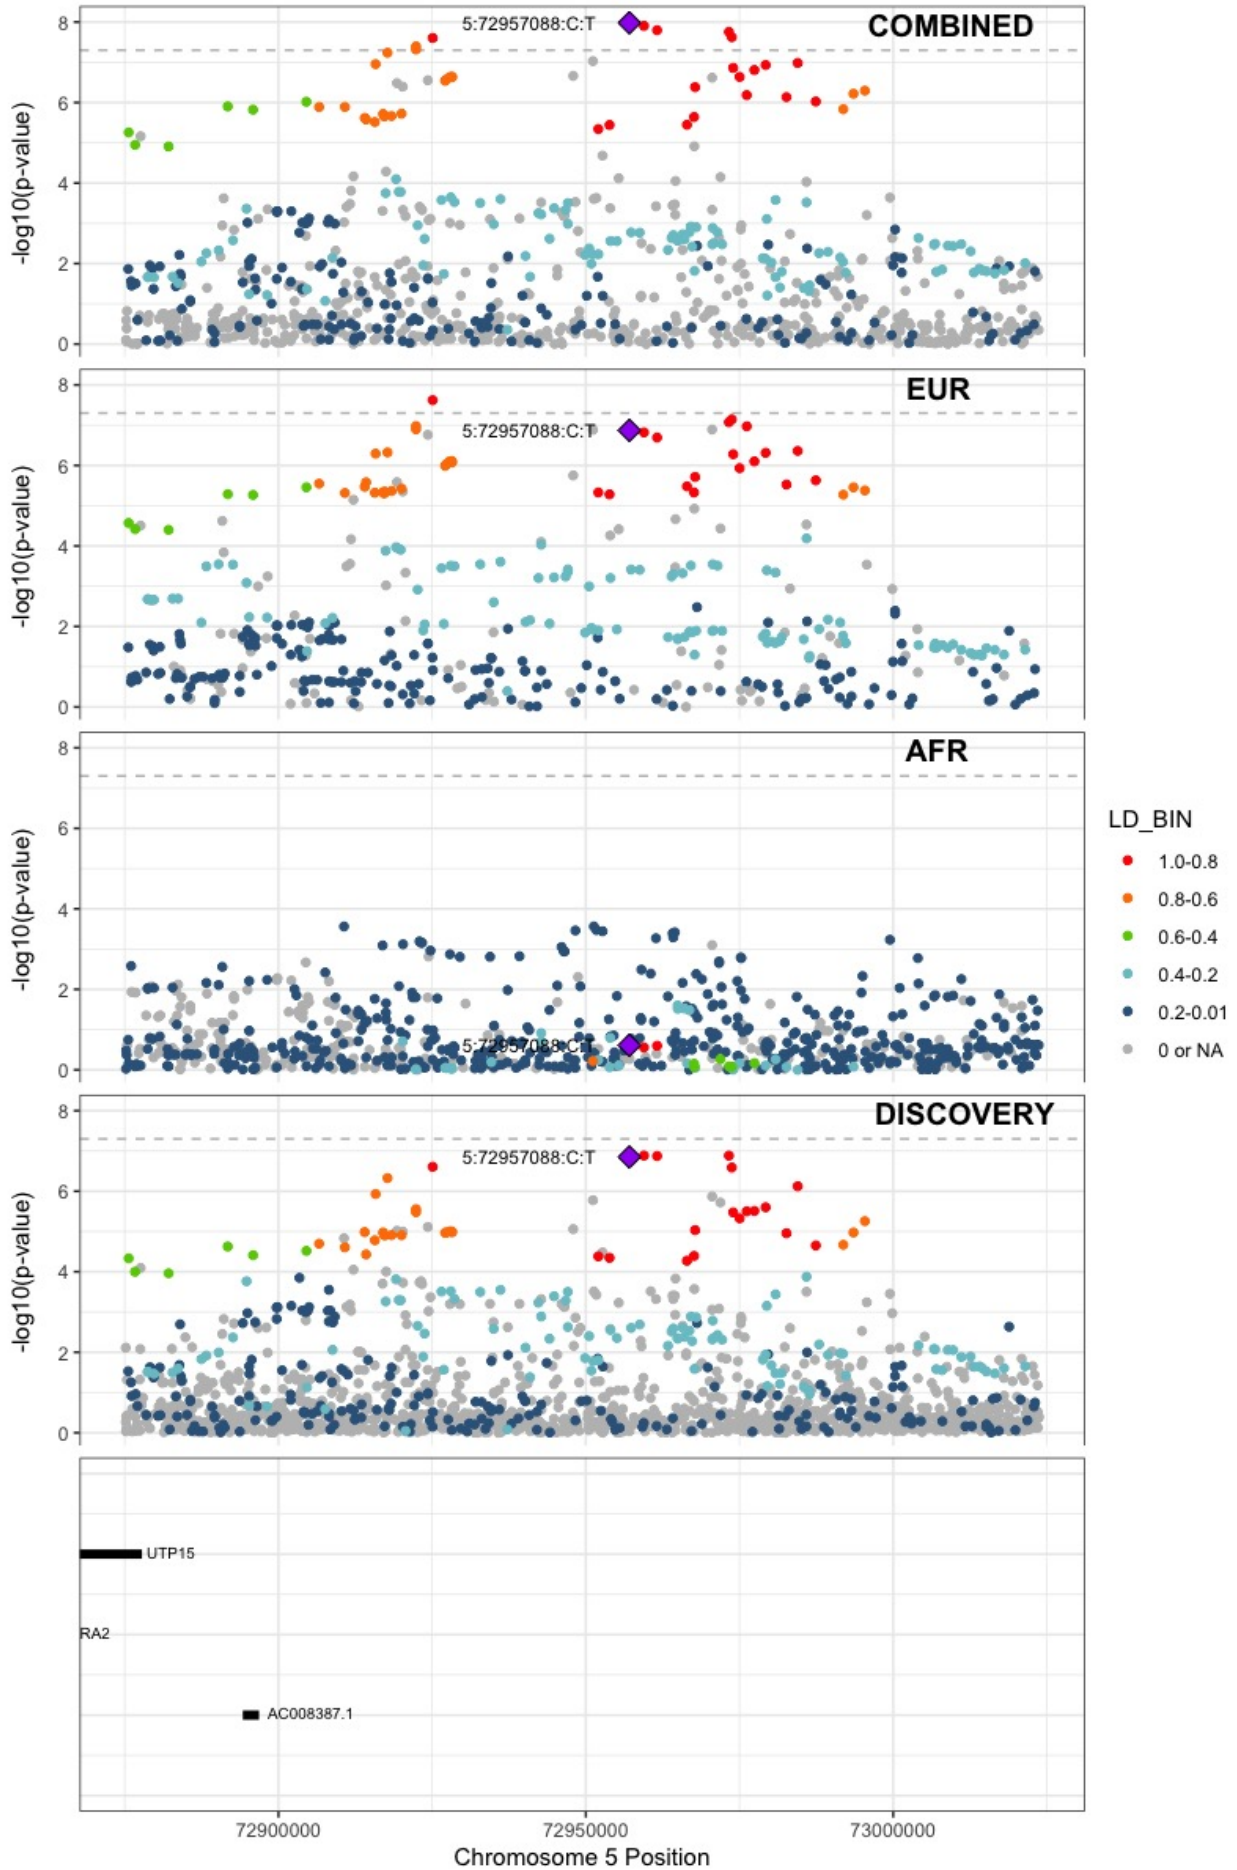

Supplementary Figure 6.36 – rs750465397 (chr5:96289036) in locus 44 (LNPEP)

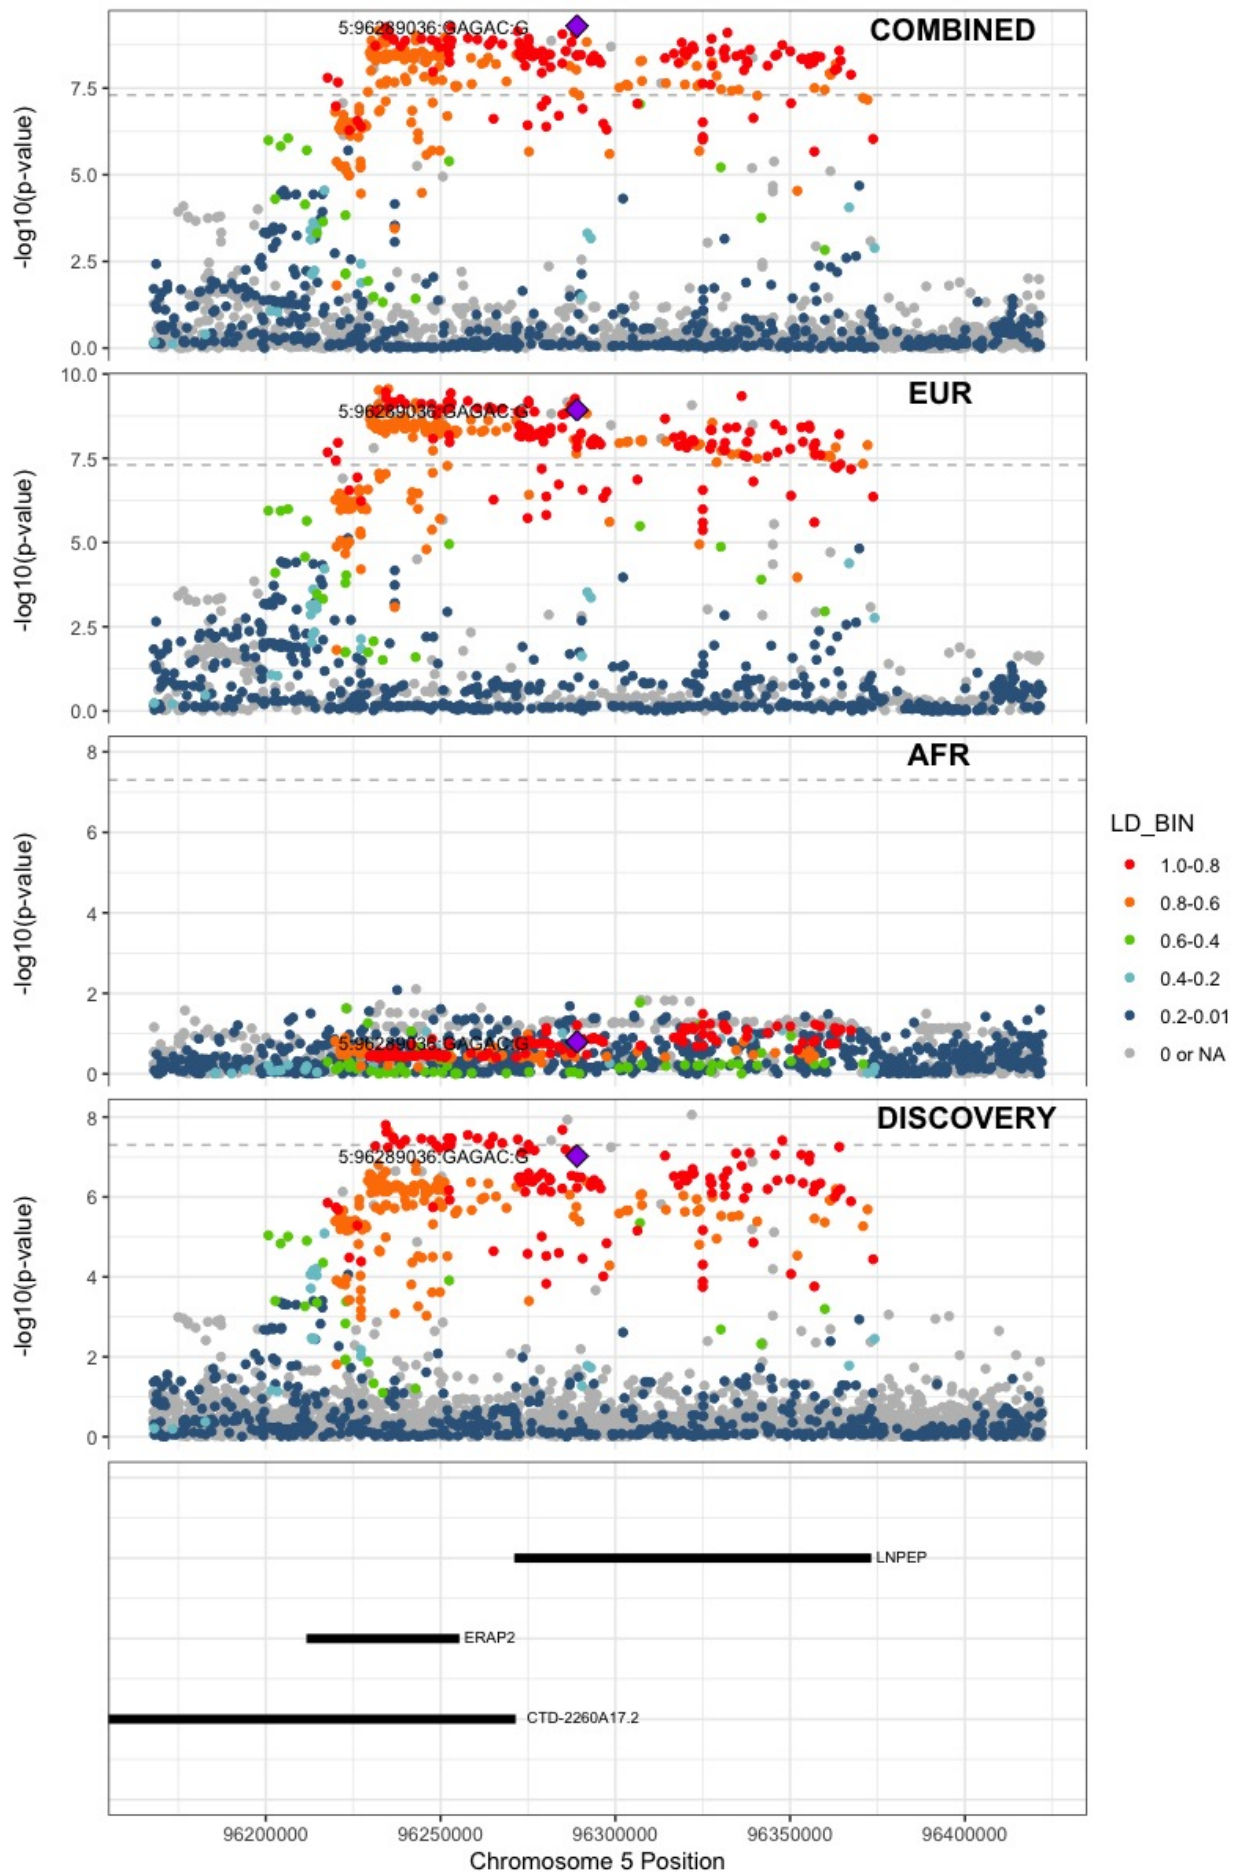

Supplementary Figure 6.37 – rs147133967 (chr5:132426851) in locus 45 (HSPA4)

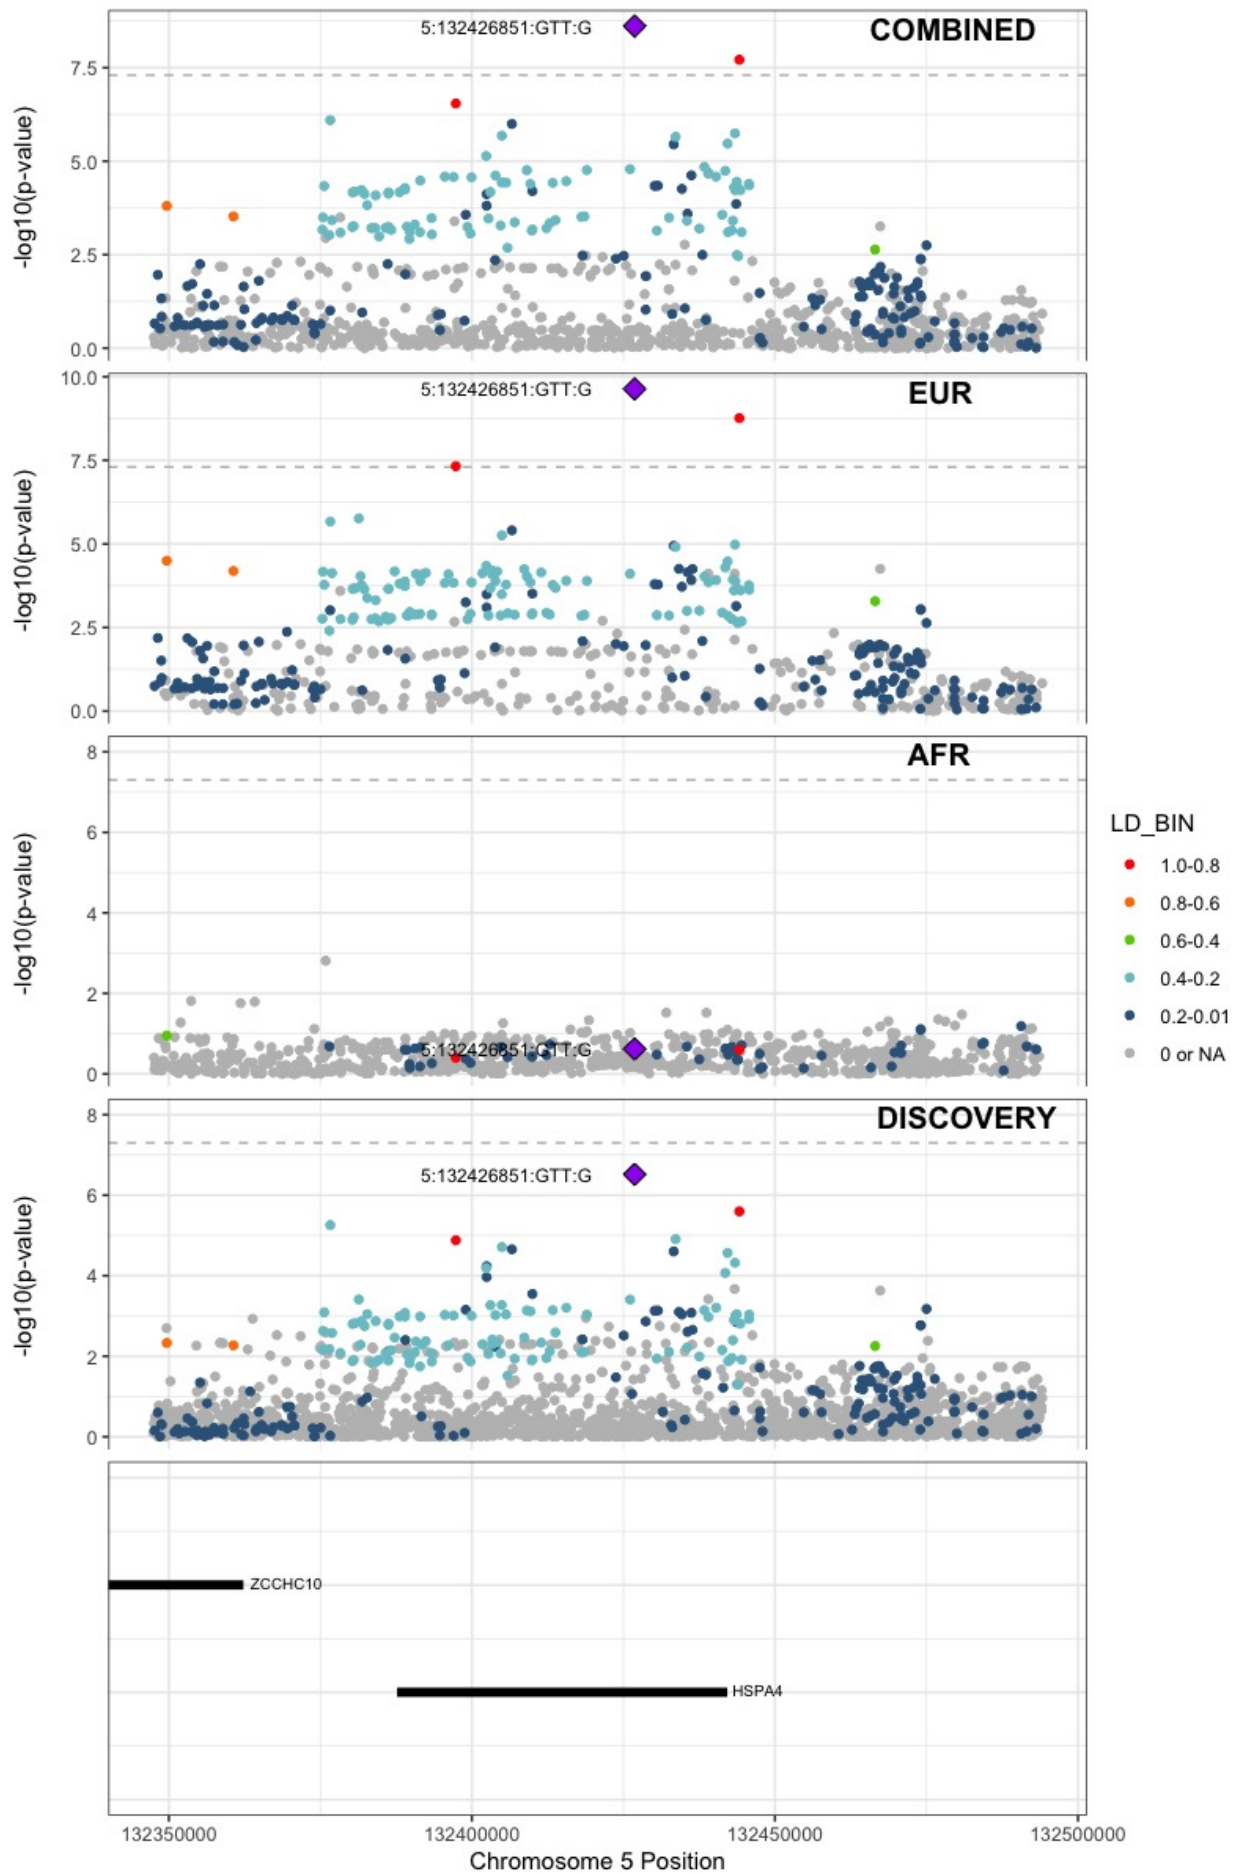



Supplementary Figure 6.38 – rs214059 (chr6:25536937) in locus 46 (CARMIL1)

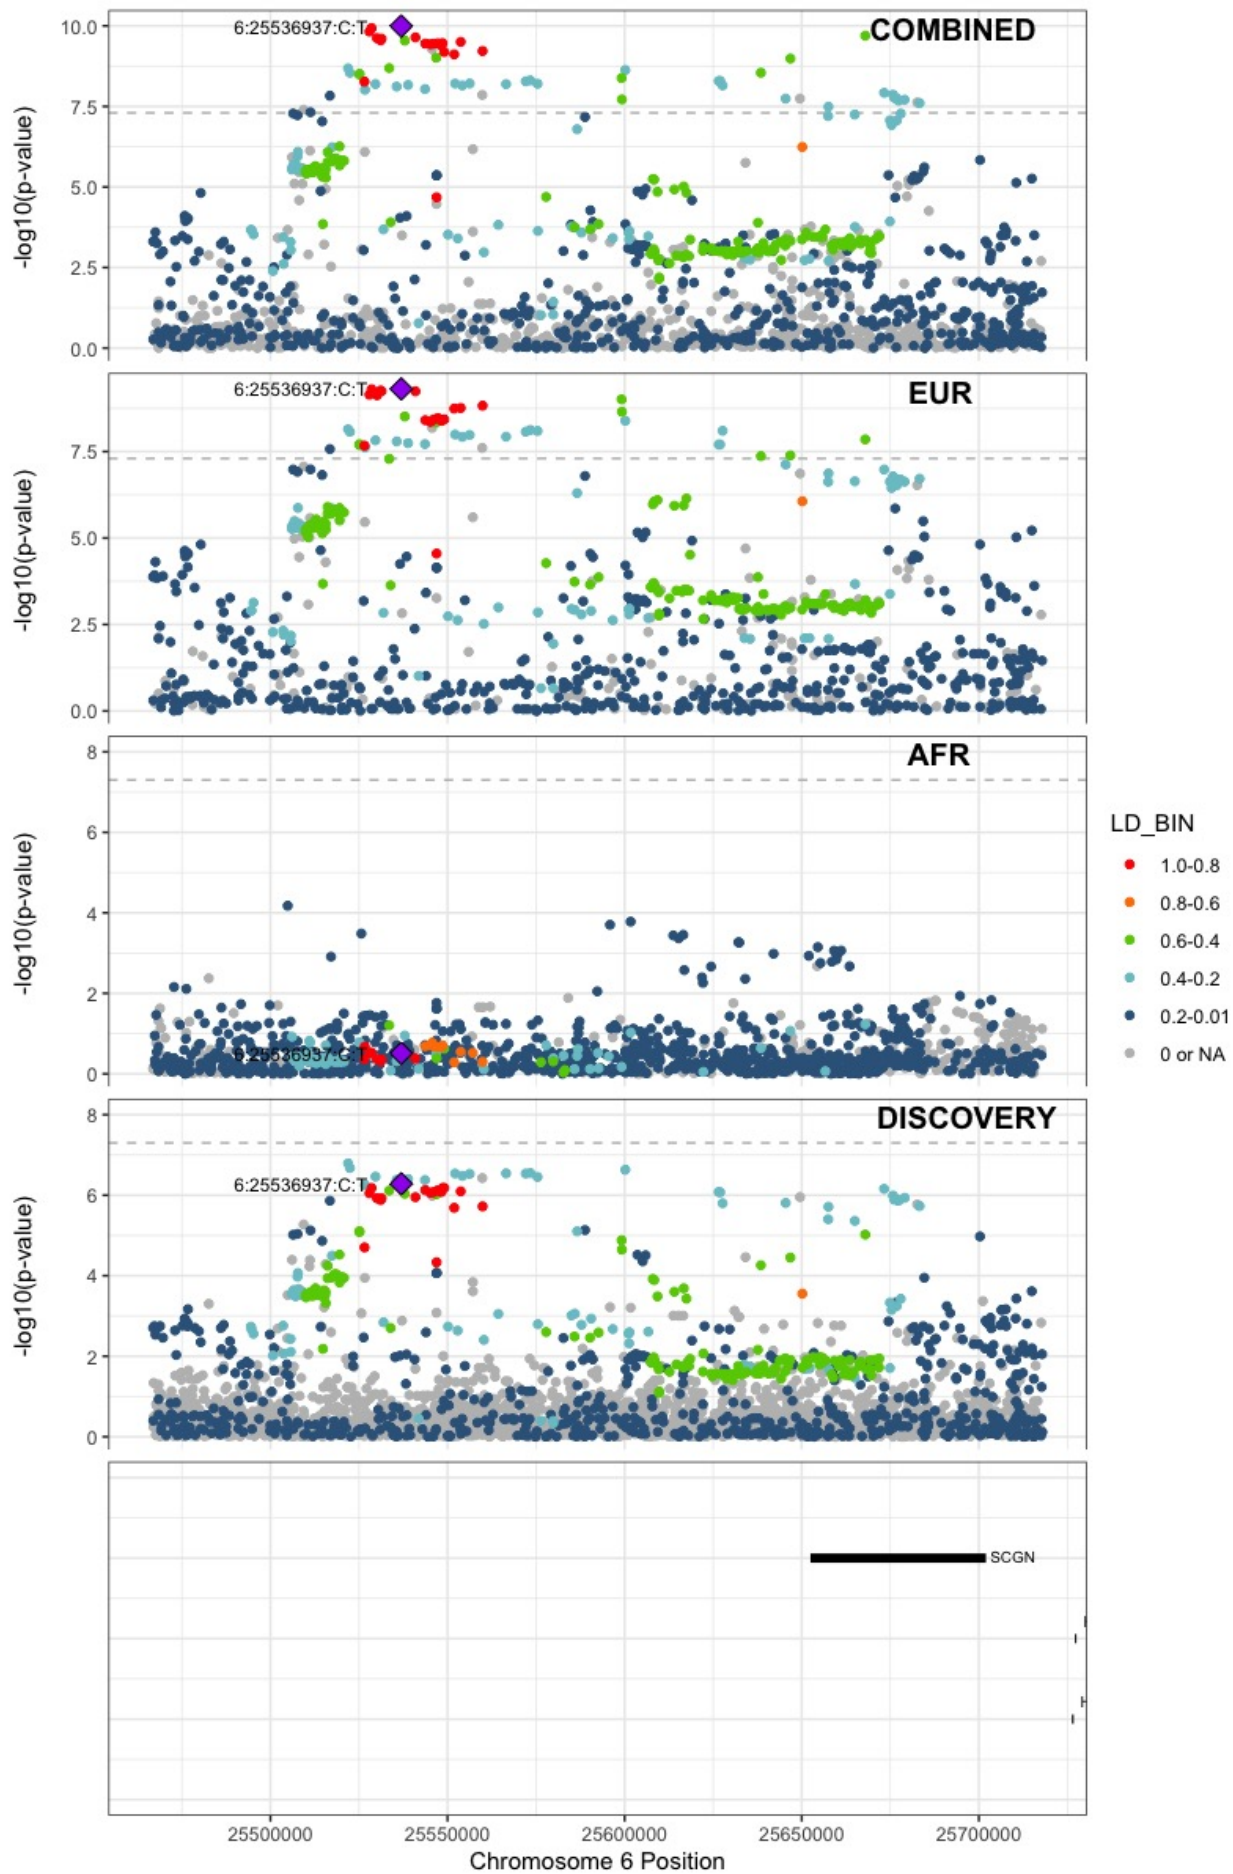

Supplementary Figure 6.39 – rs2394251 (chr6:29943688) in locus 47 (HCG9)

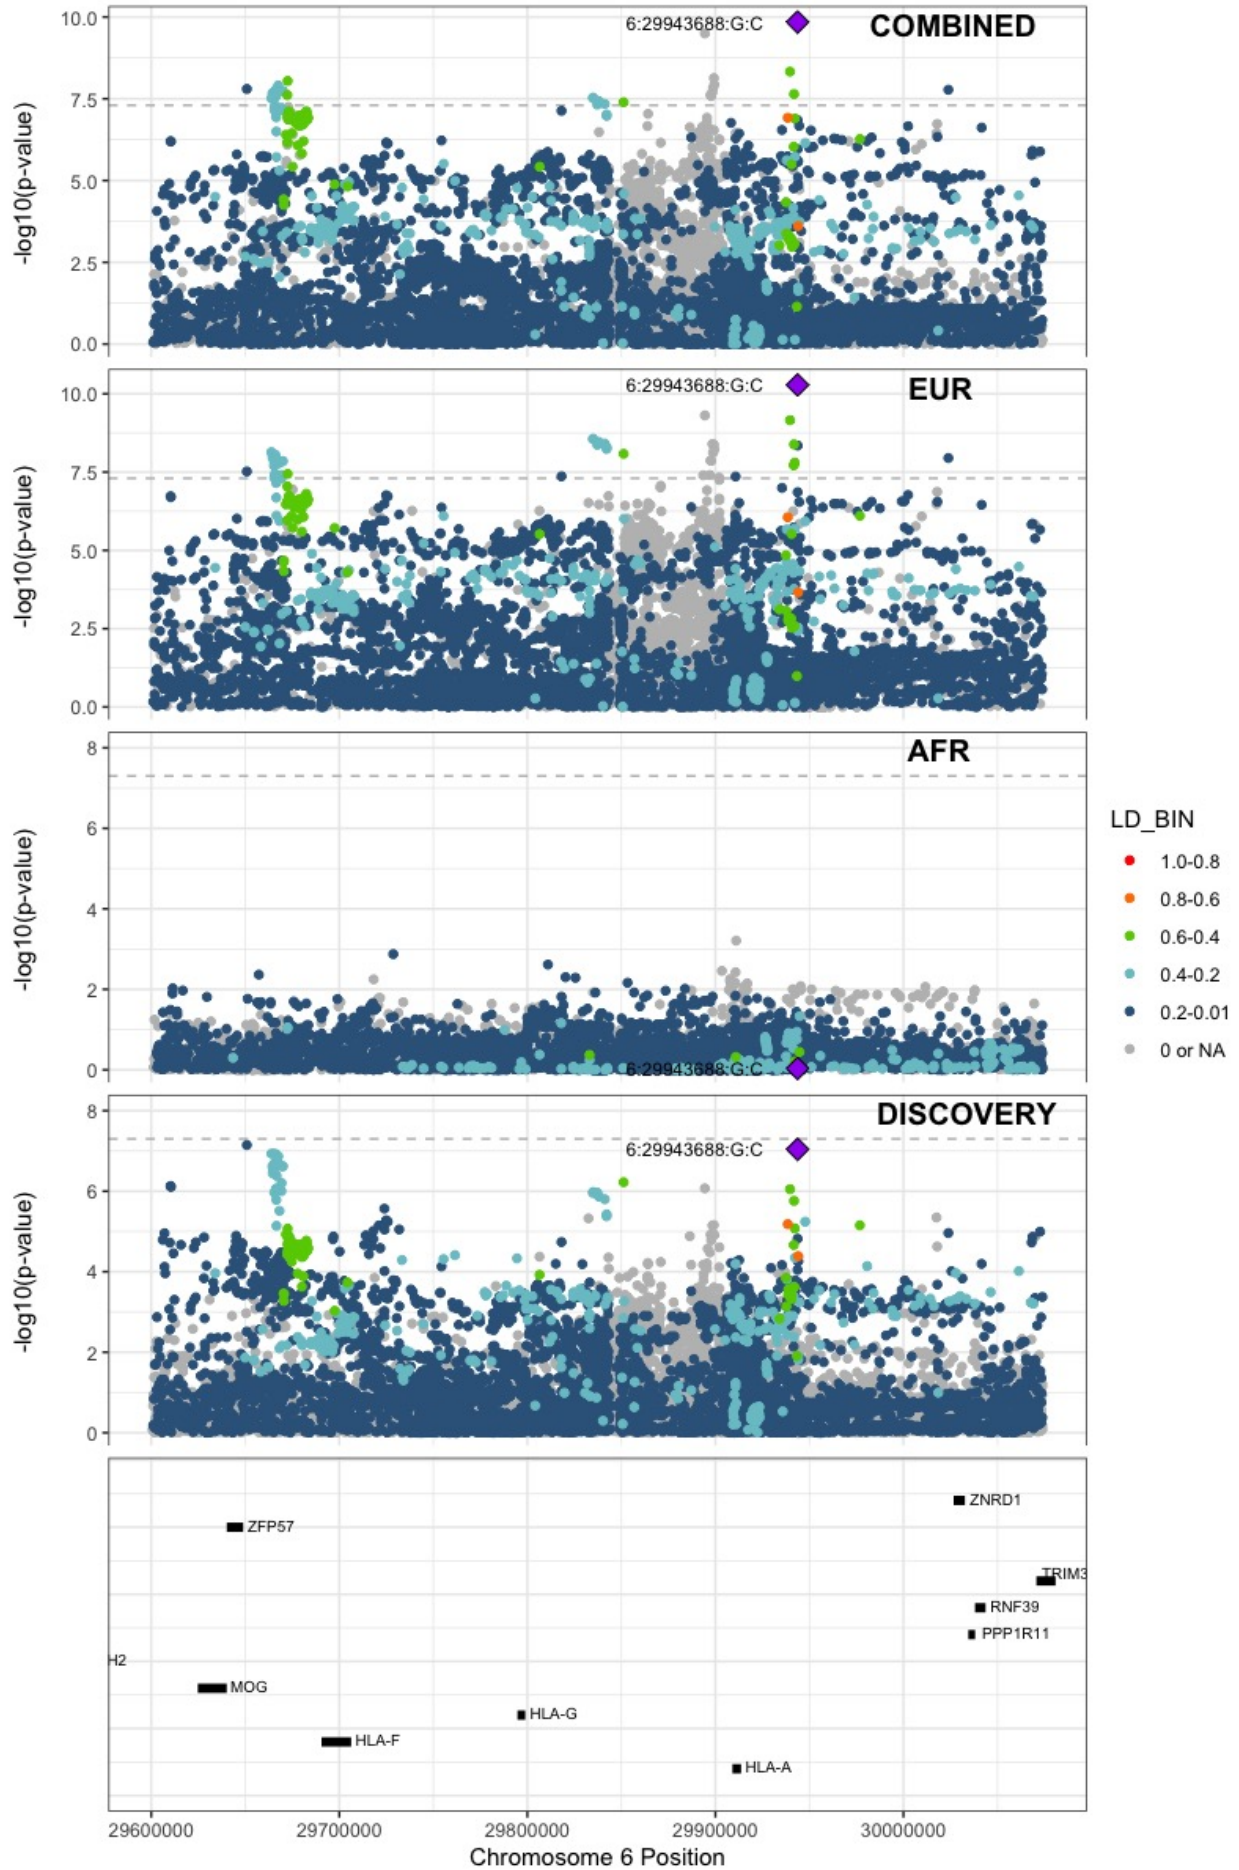

Supplementary Figure 6.40 – rs9268863 (chr6:32430289) in locus 48 (HLA-DRA ;HLA-DRB5)

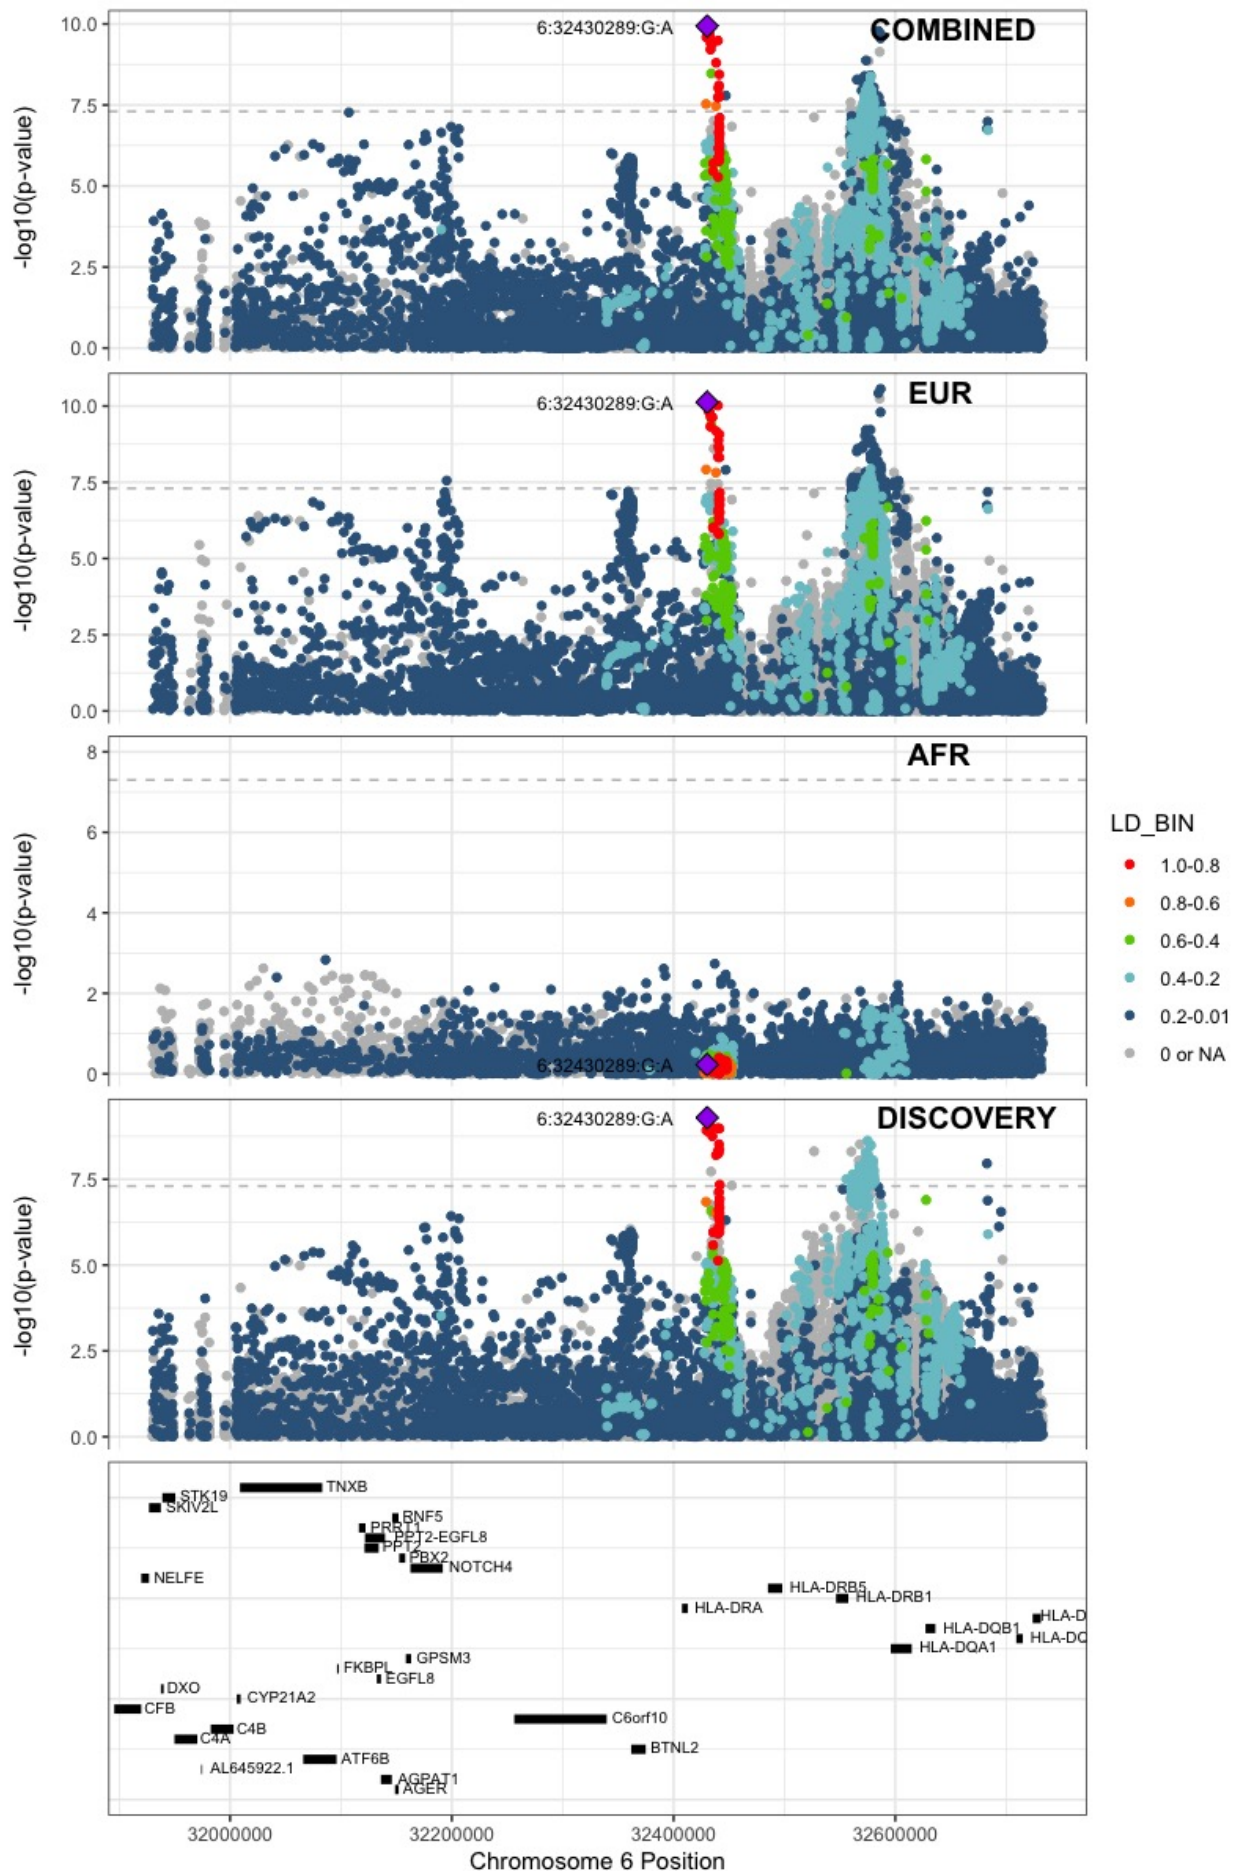

Supplementary Figure 6.41 – rs145294670 (chr6:34622561) in locus 49 (ILRUN)

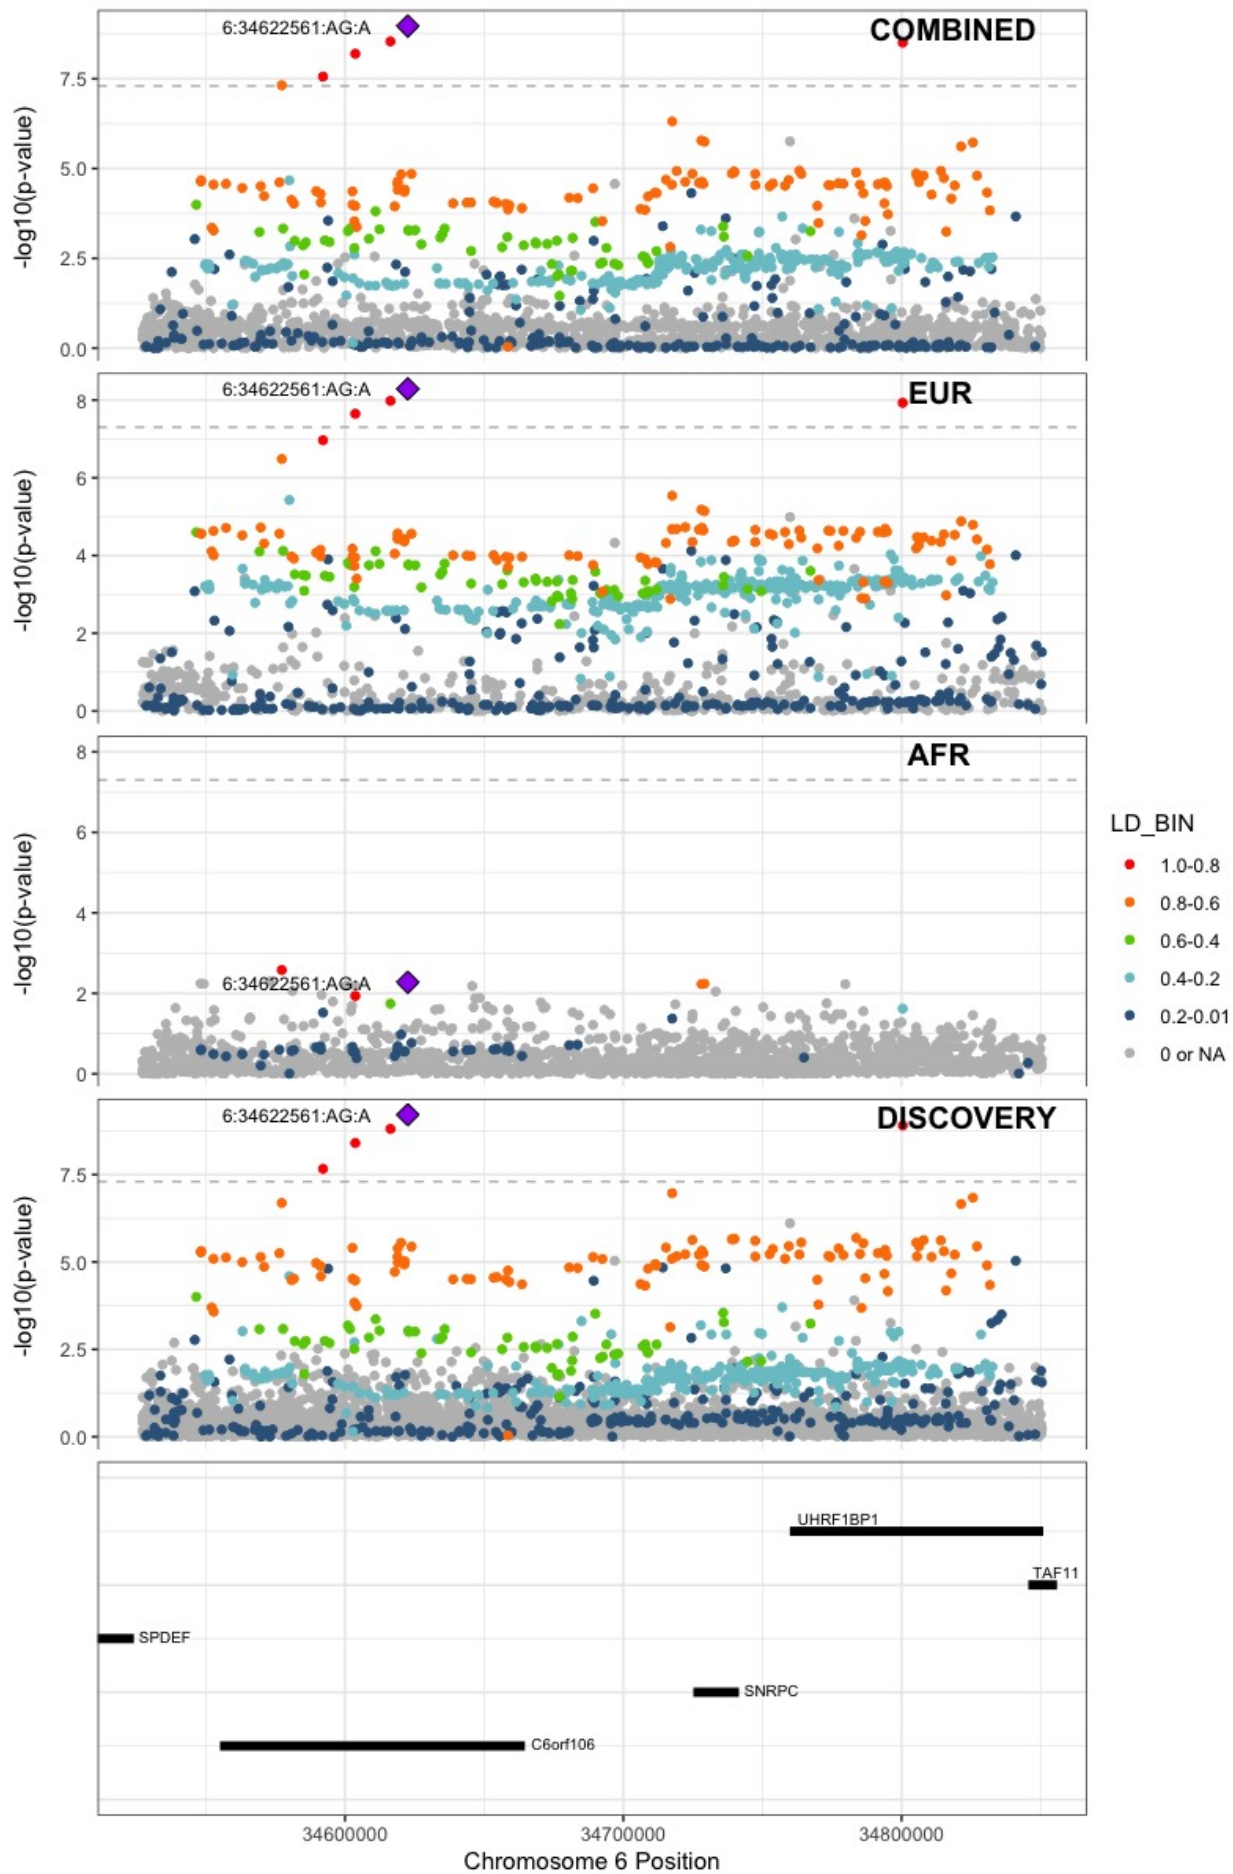

Supplementary Figure 6.42 – rs9386182 (chr6:147691069) in locus 52 (STXBP5)

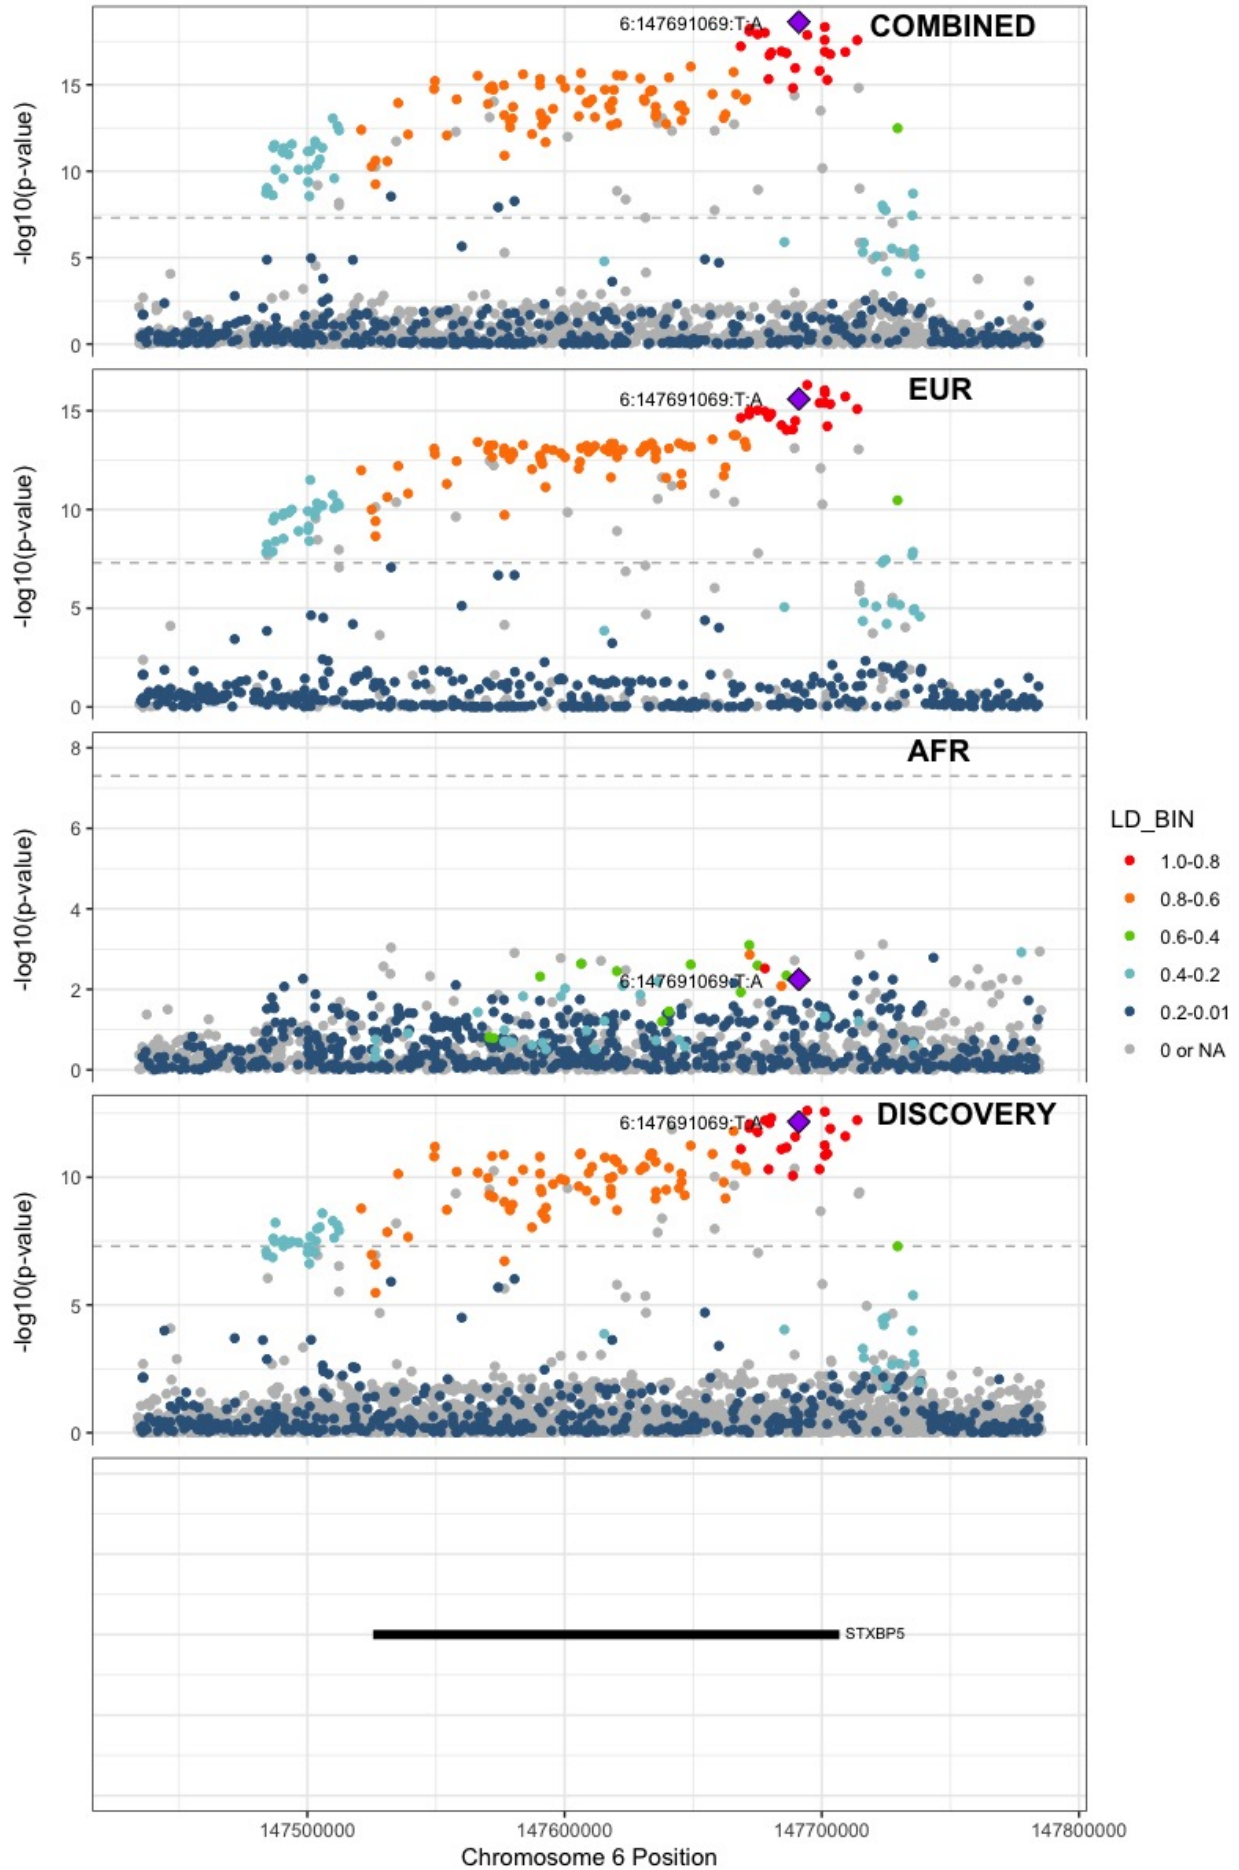

Supplementary Figure 6.43 – rs1513275 (chr7:28259233) in locus 53 (JAZF1-AS1)

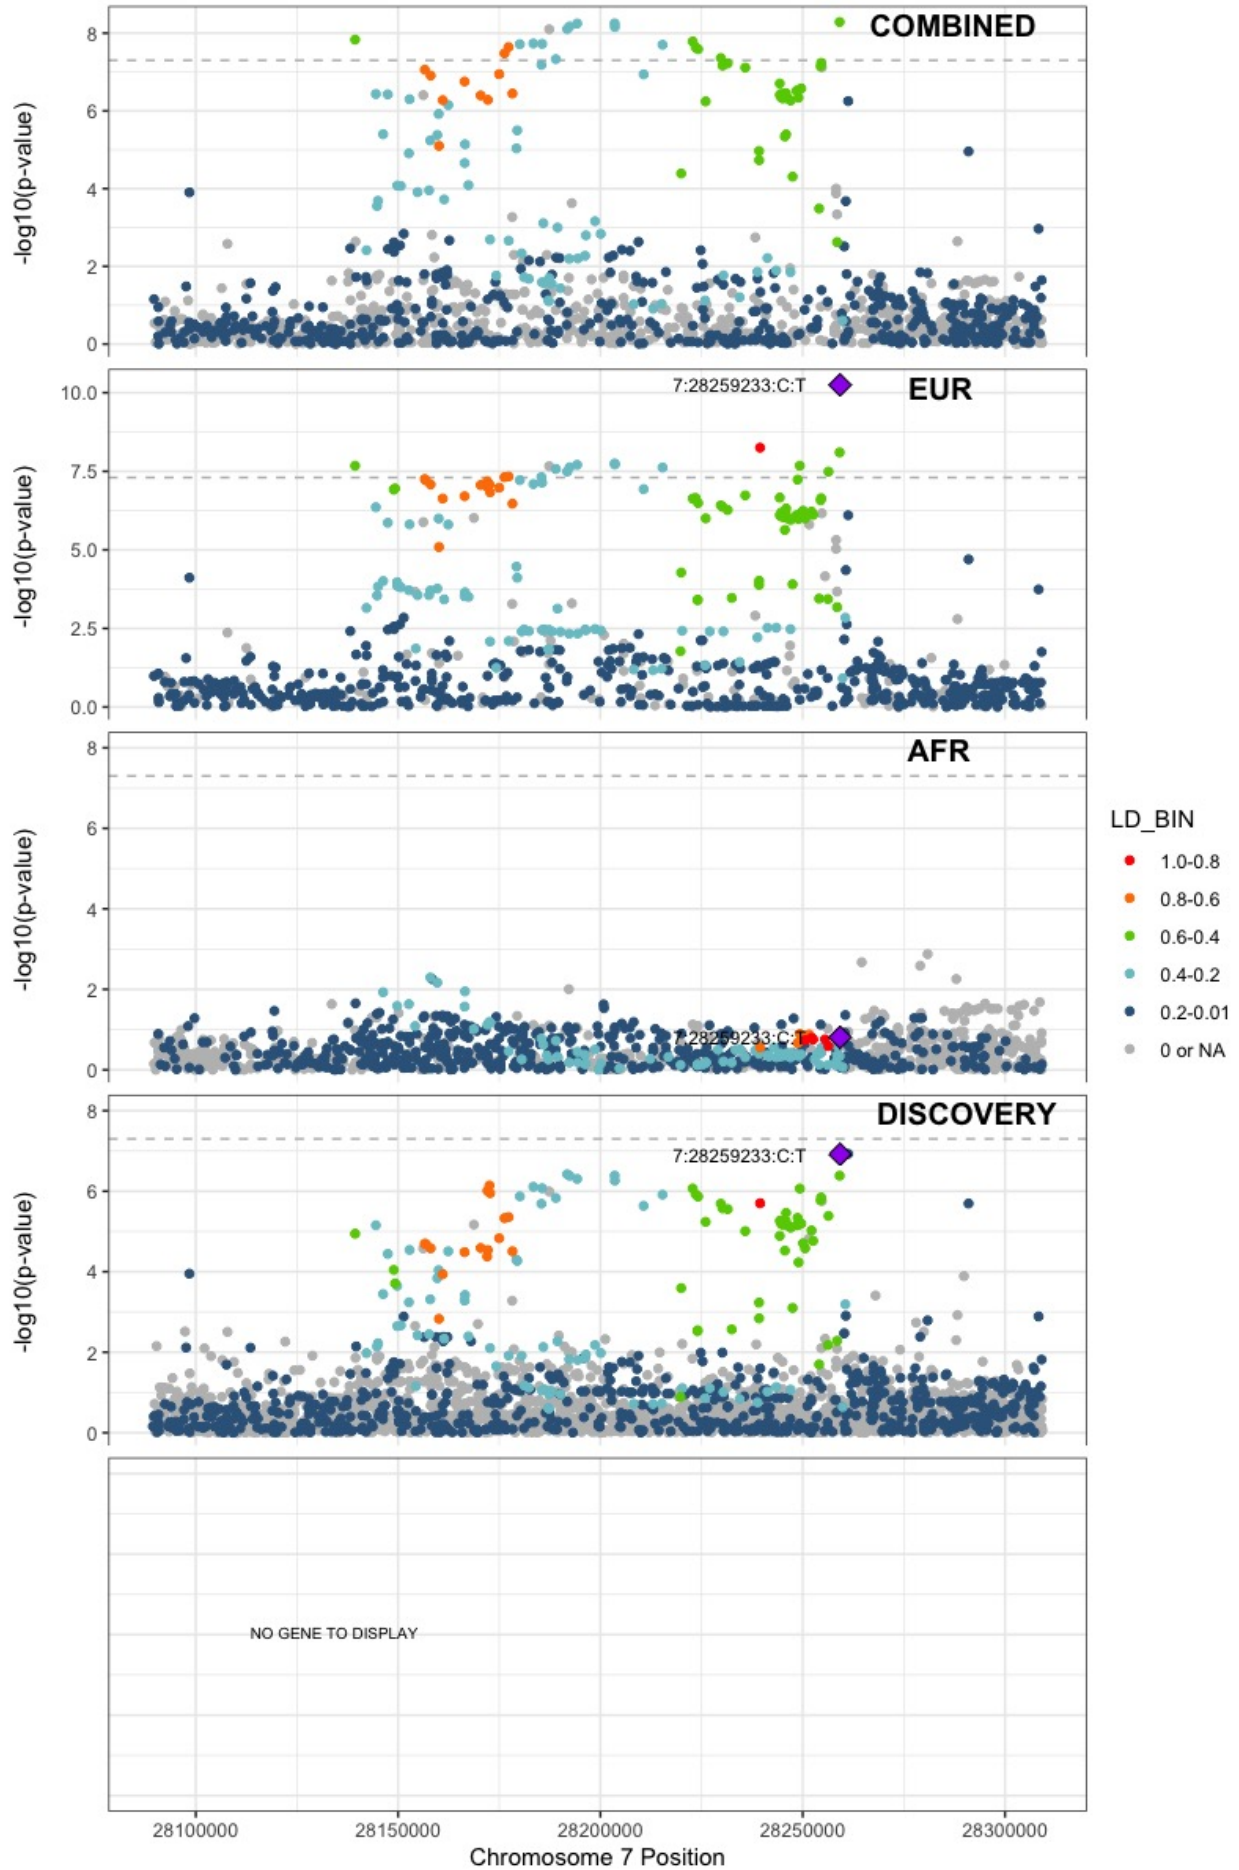

Supplementary Figure 6.44 – rs42038 (chr7:92243719) in locus 54 (CDK6)

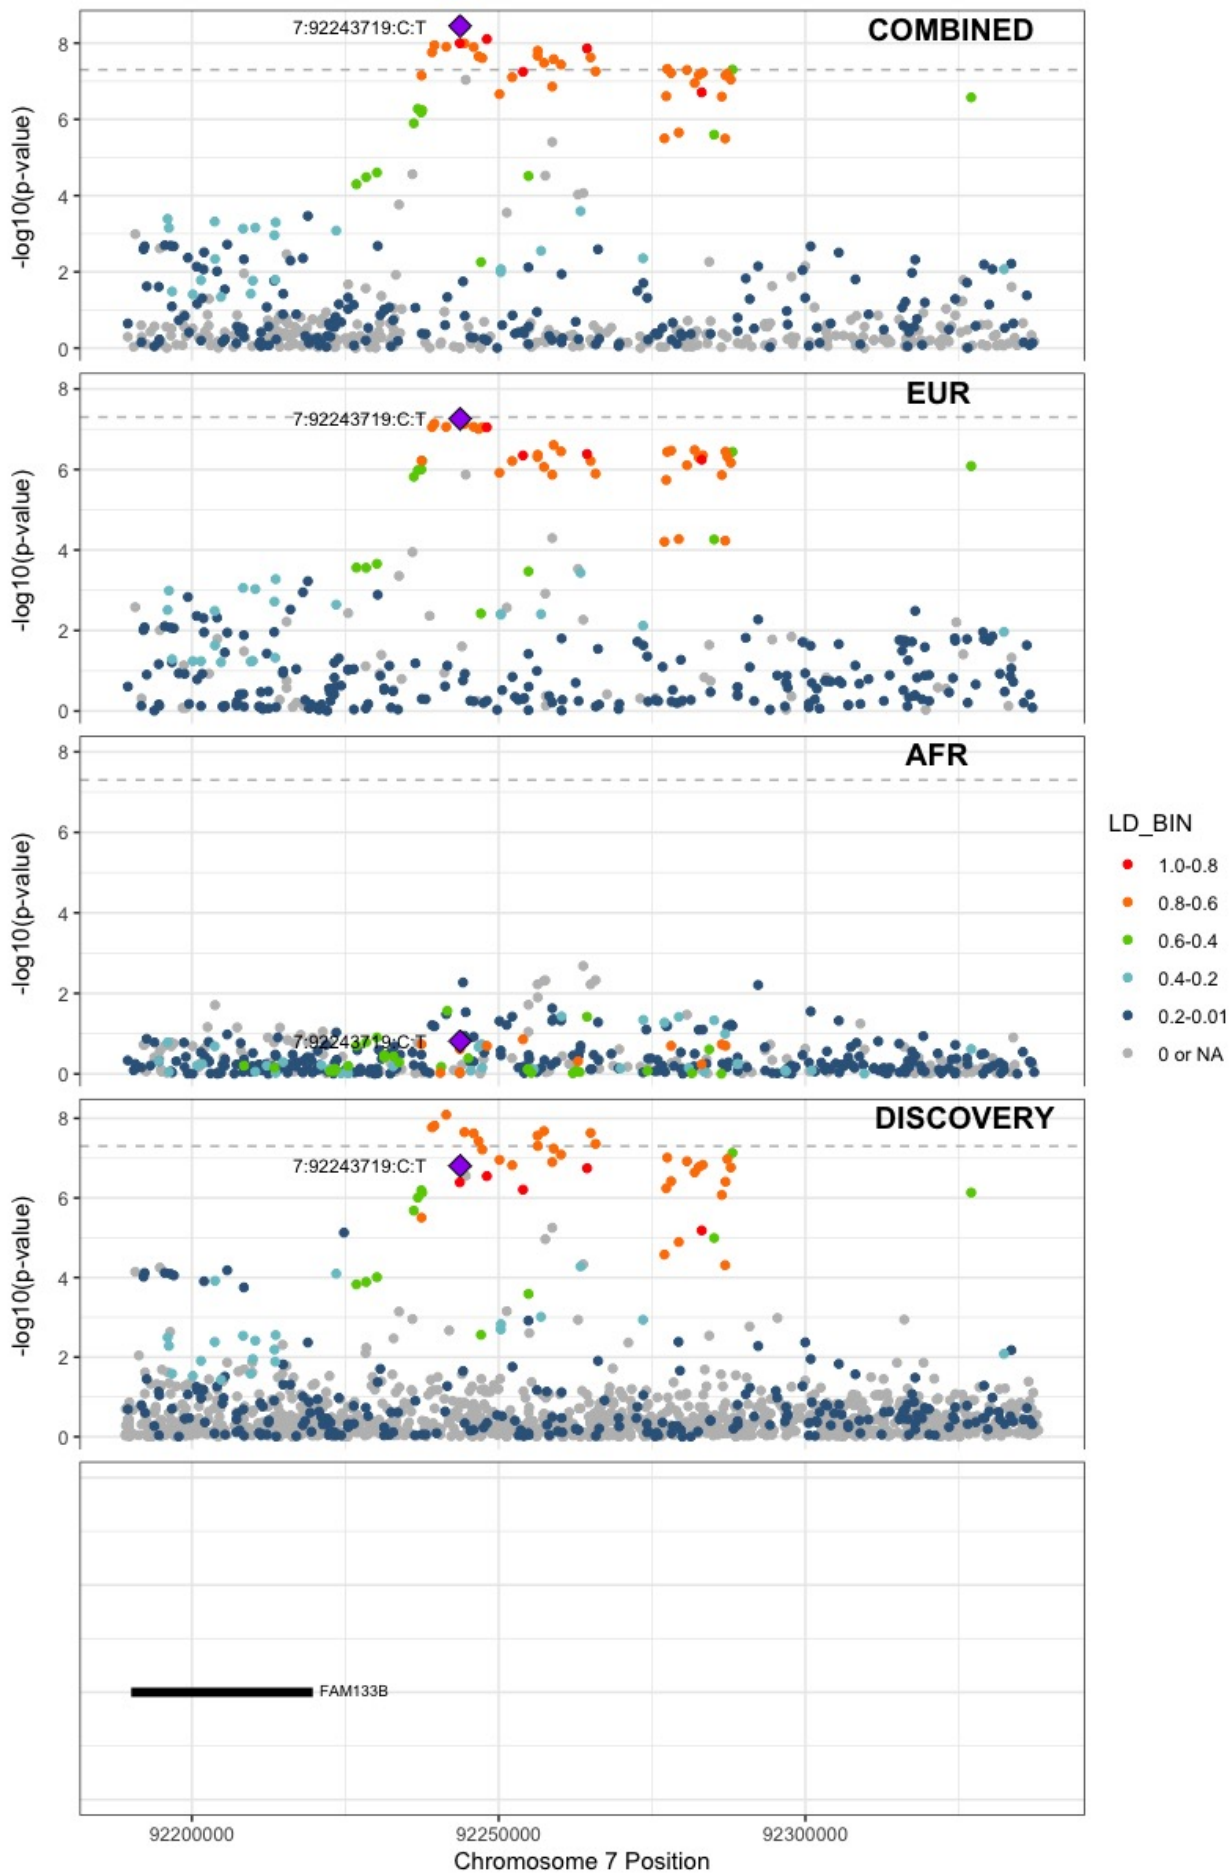

Supplementary Figure 6.45 – rs10099512 (chr8:9178821) in locus 57 (LOC101929128;LOC157273)

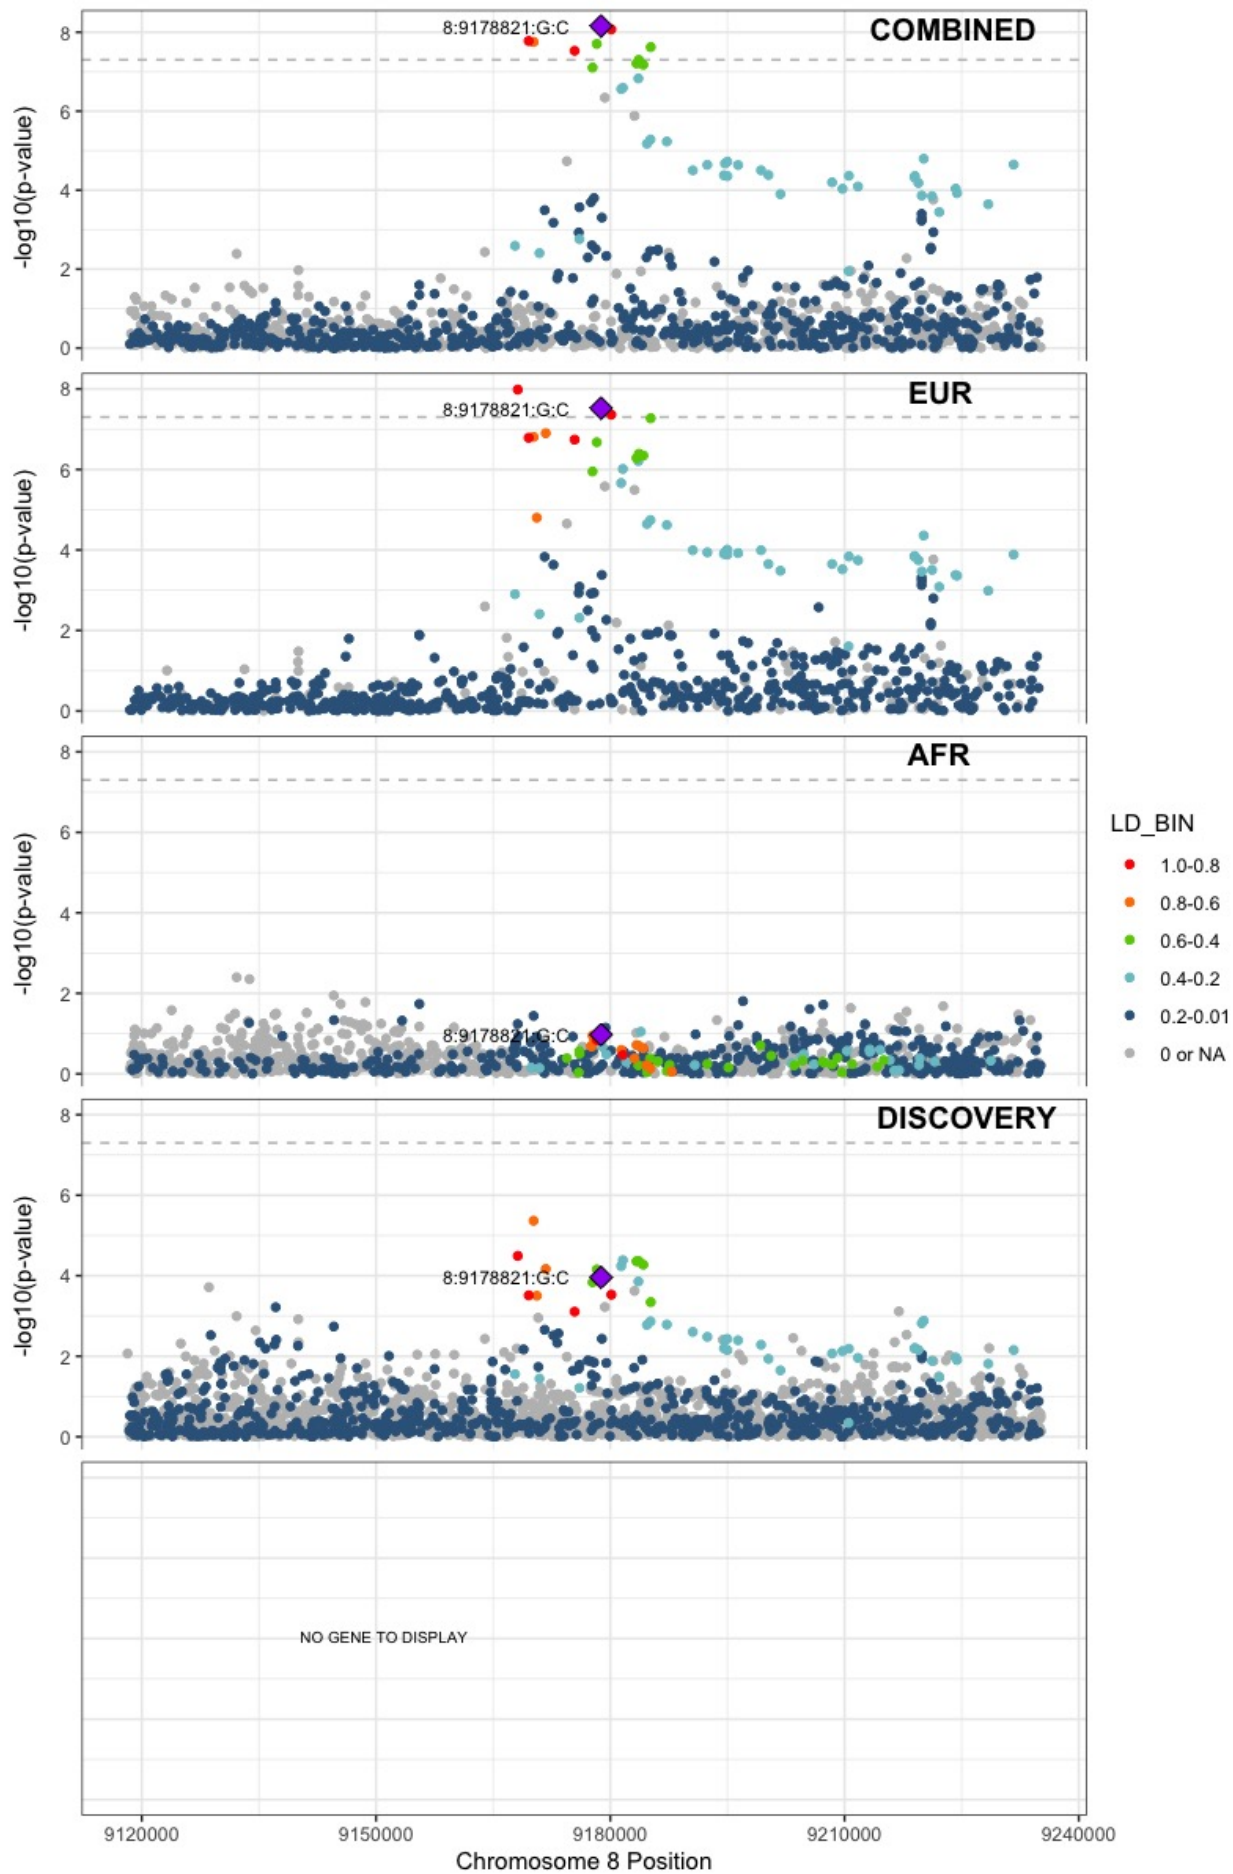



Supplementary Figure 6.46 – rs2048528 (chr8:23373680) in locus 59 (ENTPD4;SLC25A37)

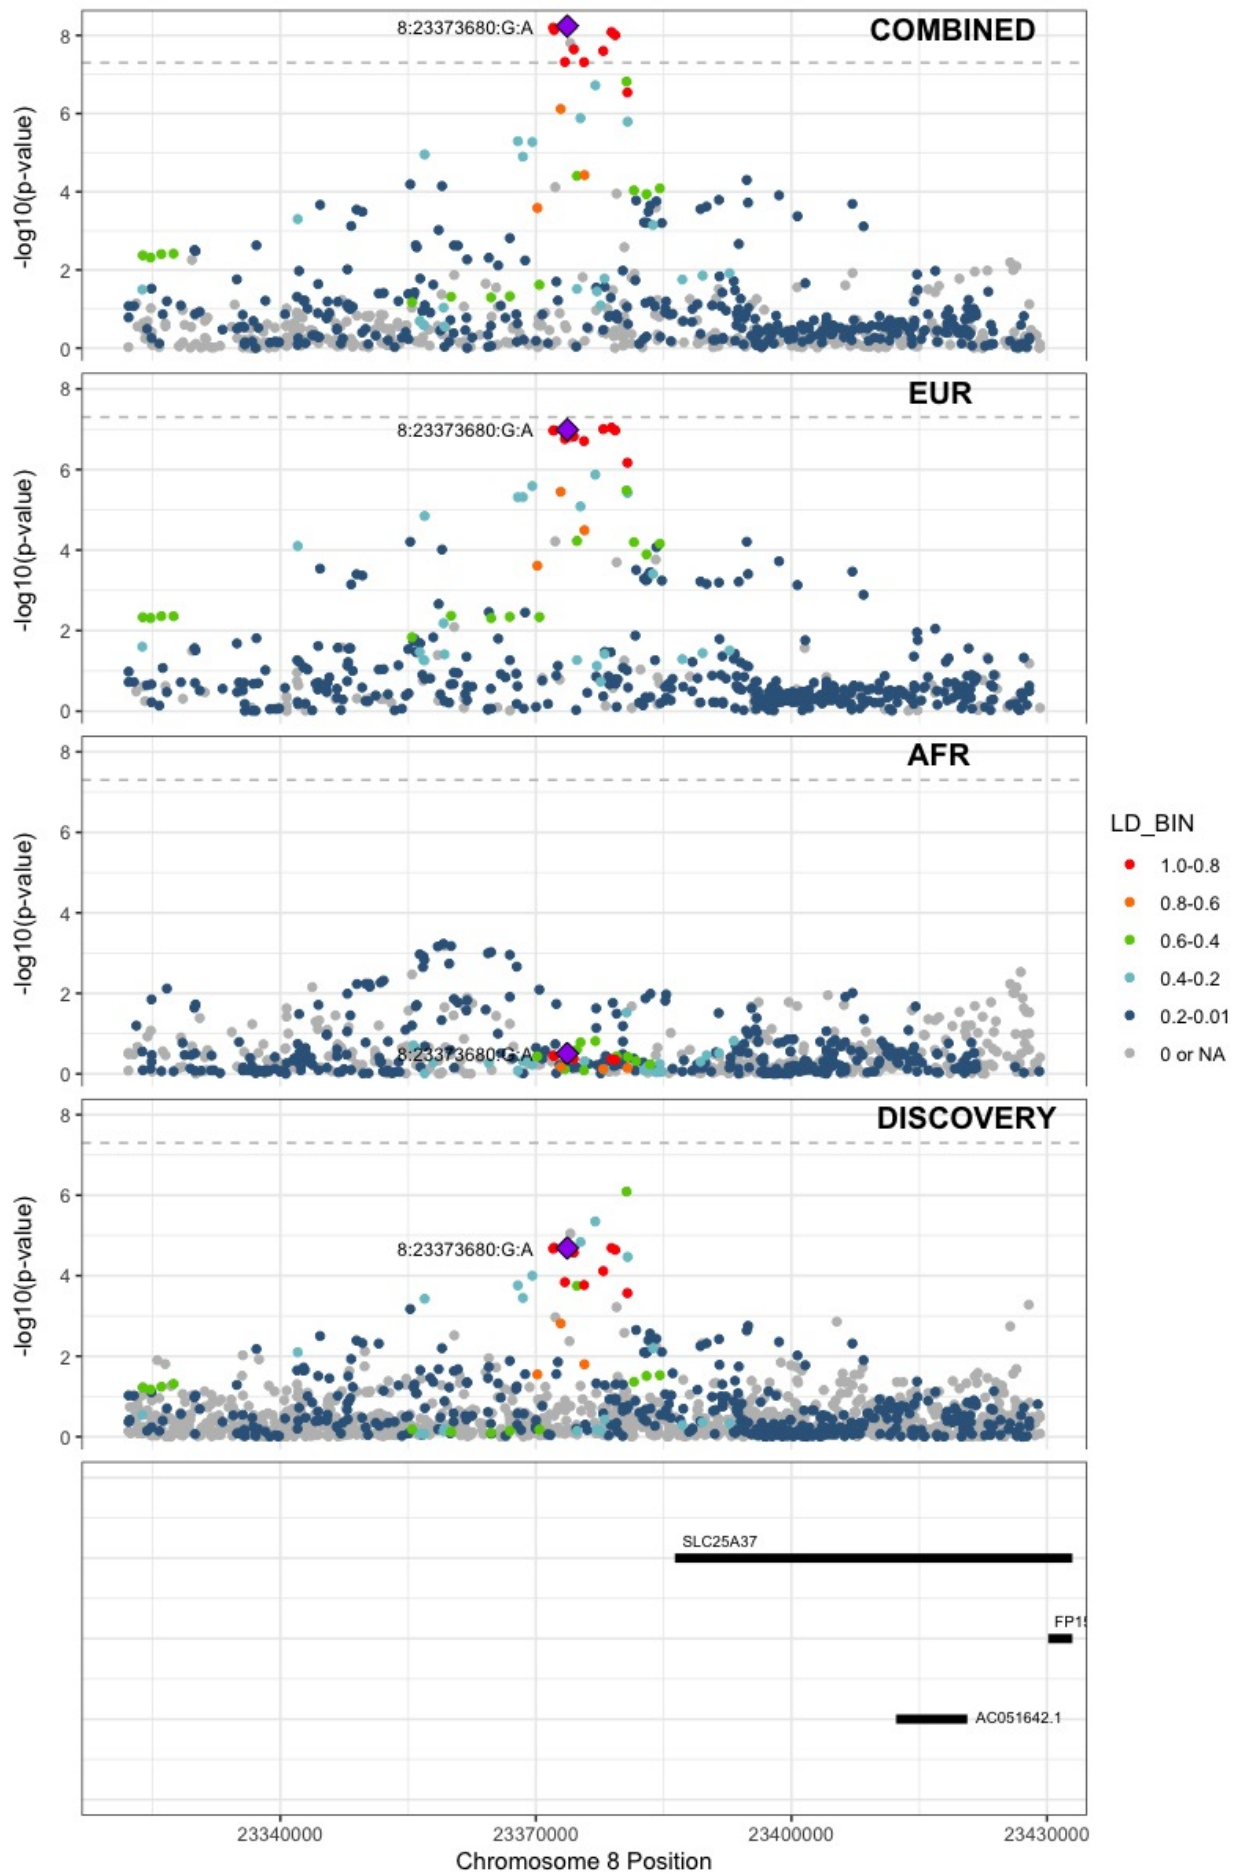

Supplementary Figure 6.47 – rs2685412 (chr8:27810603) in locus 60 (SCARA5)

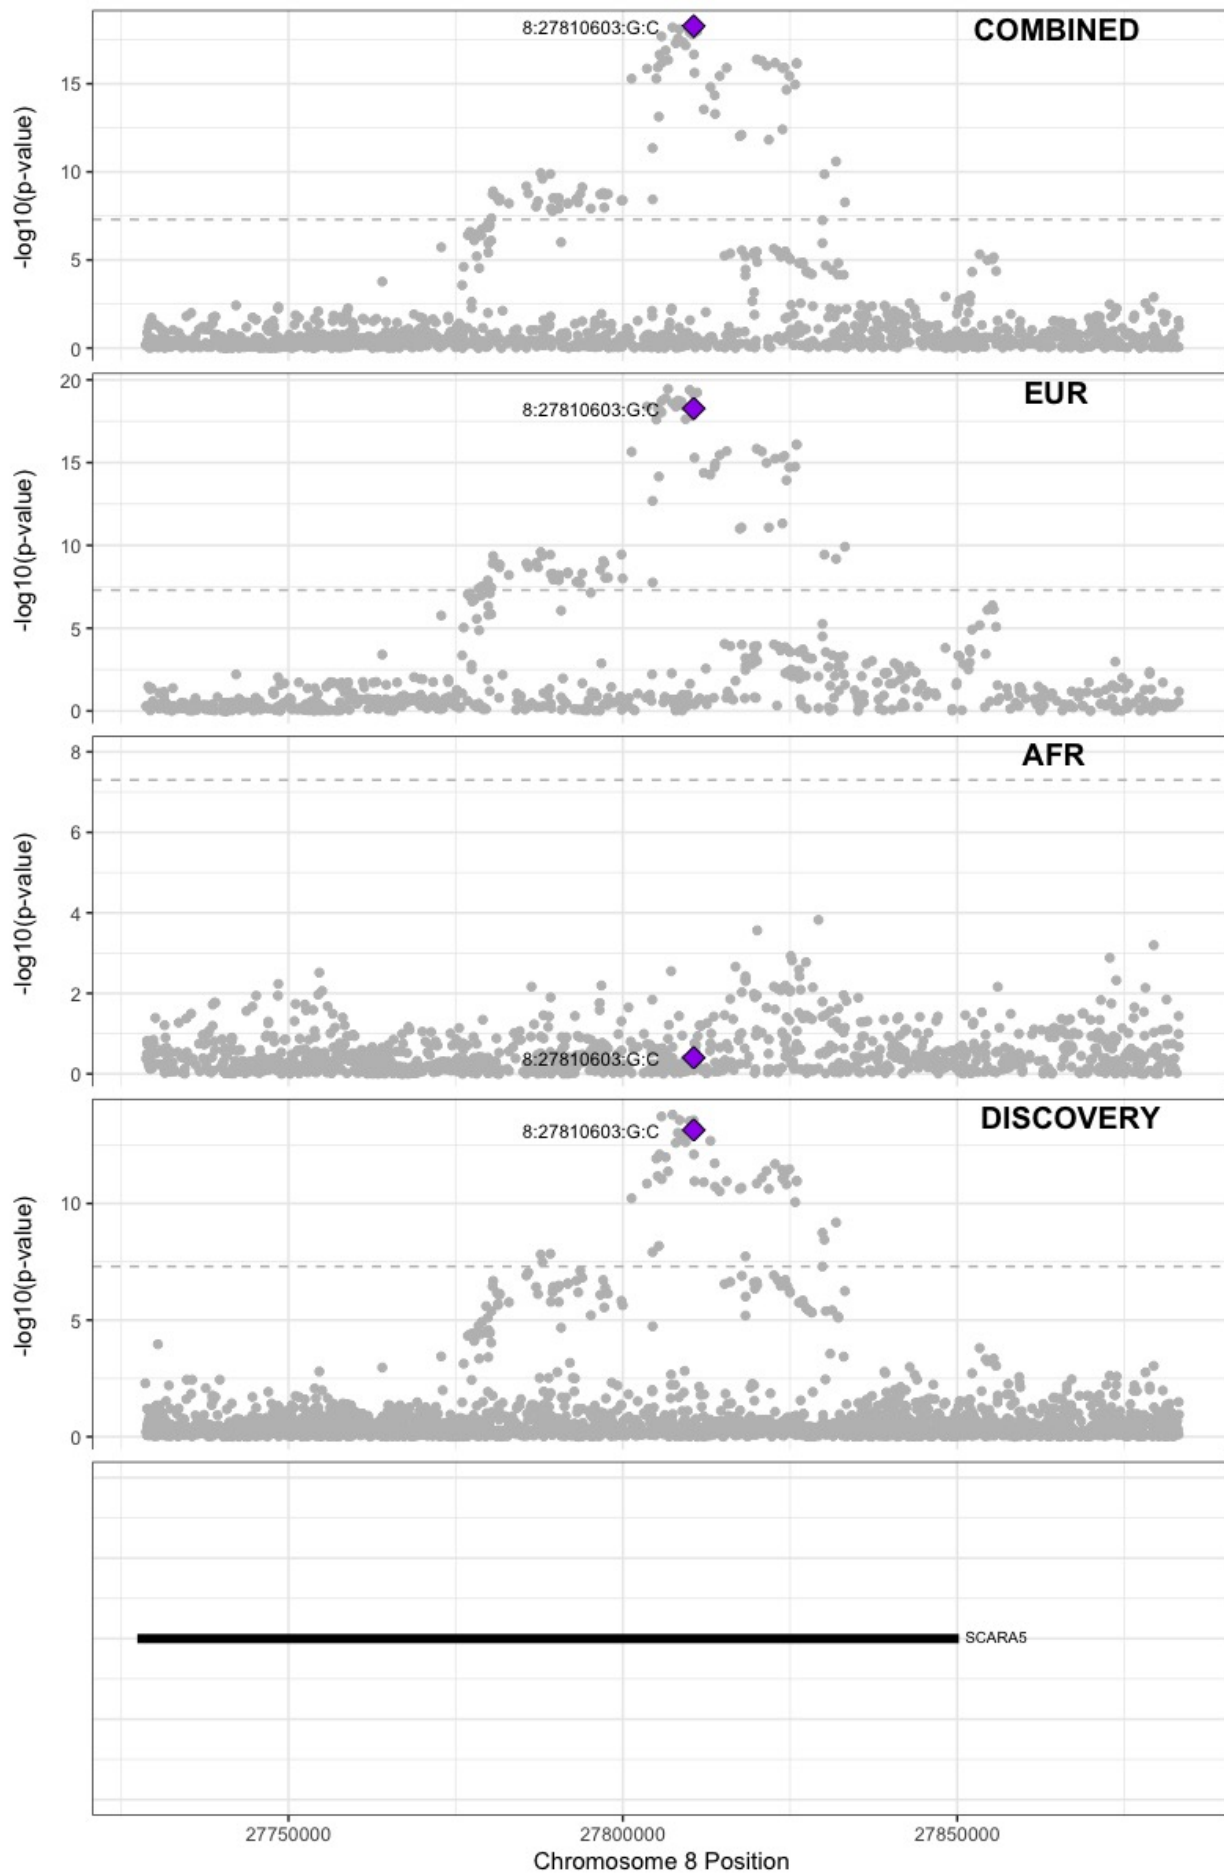

Supplementary Figure 6.48 – rs2915595 (chr8:30402817) in locus 61 (RBPMS)

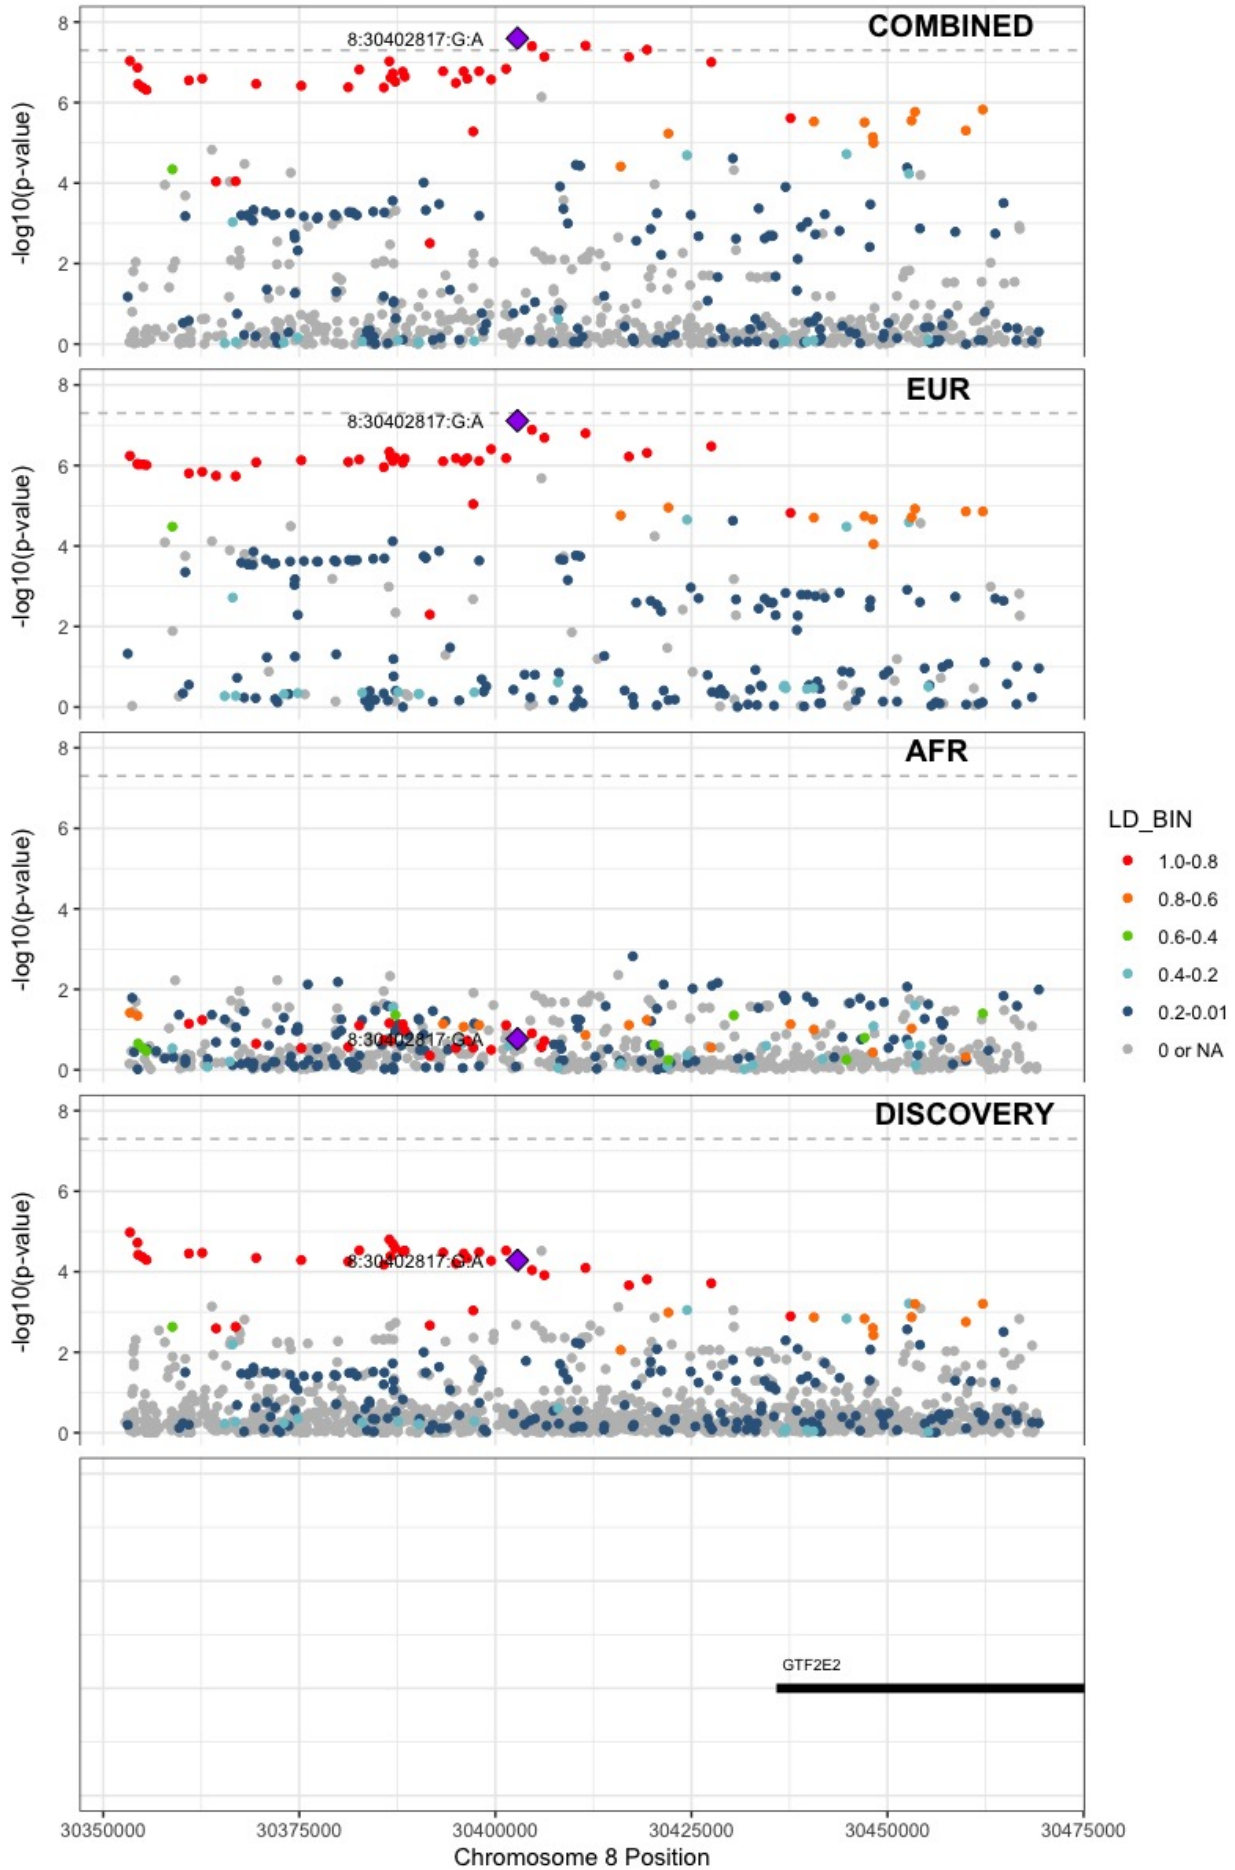

Supplementary Figure 6.49 – rs6993770 (chr8:106581528) in locus 62 (ZFPM2)

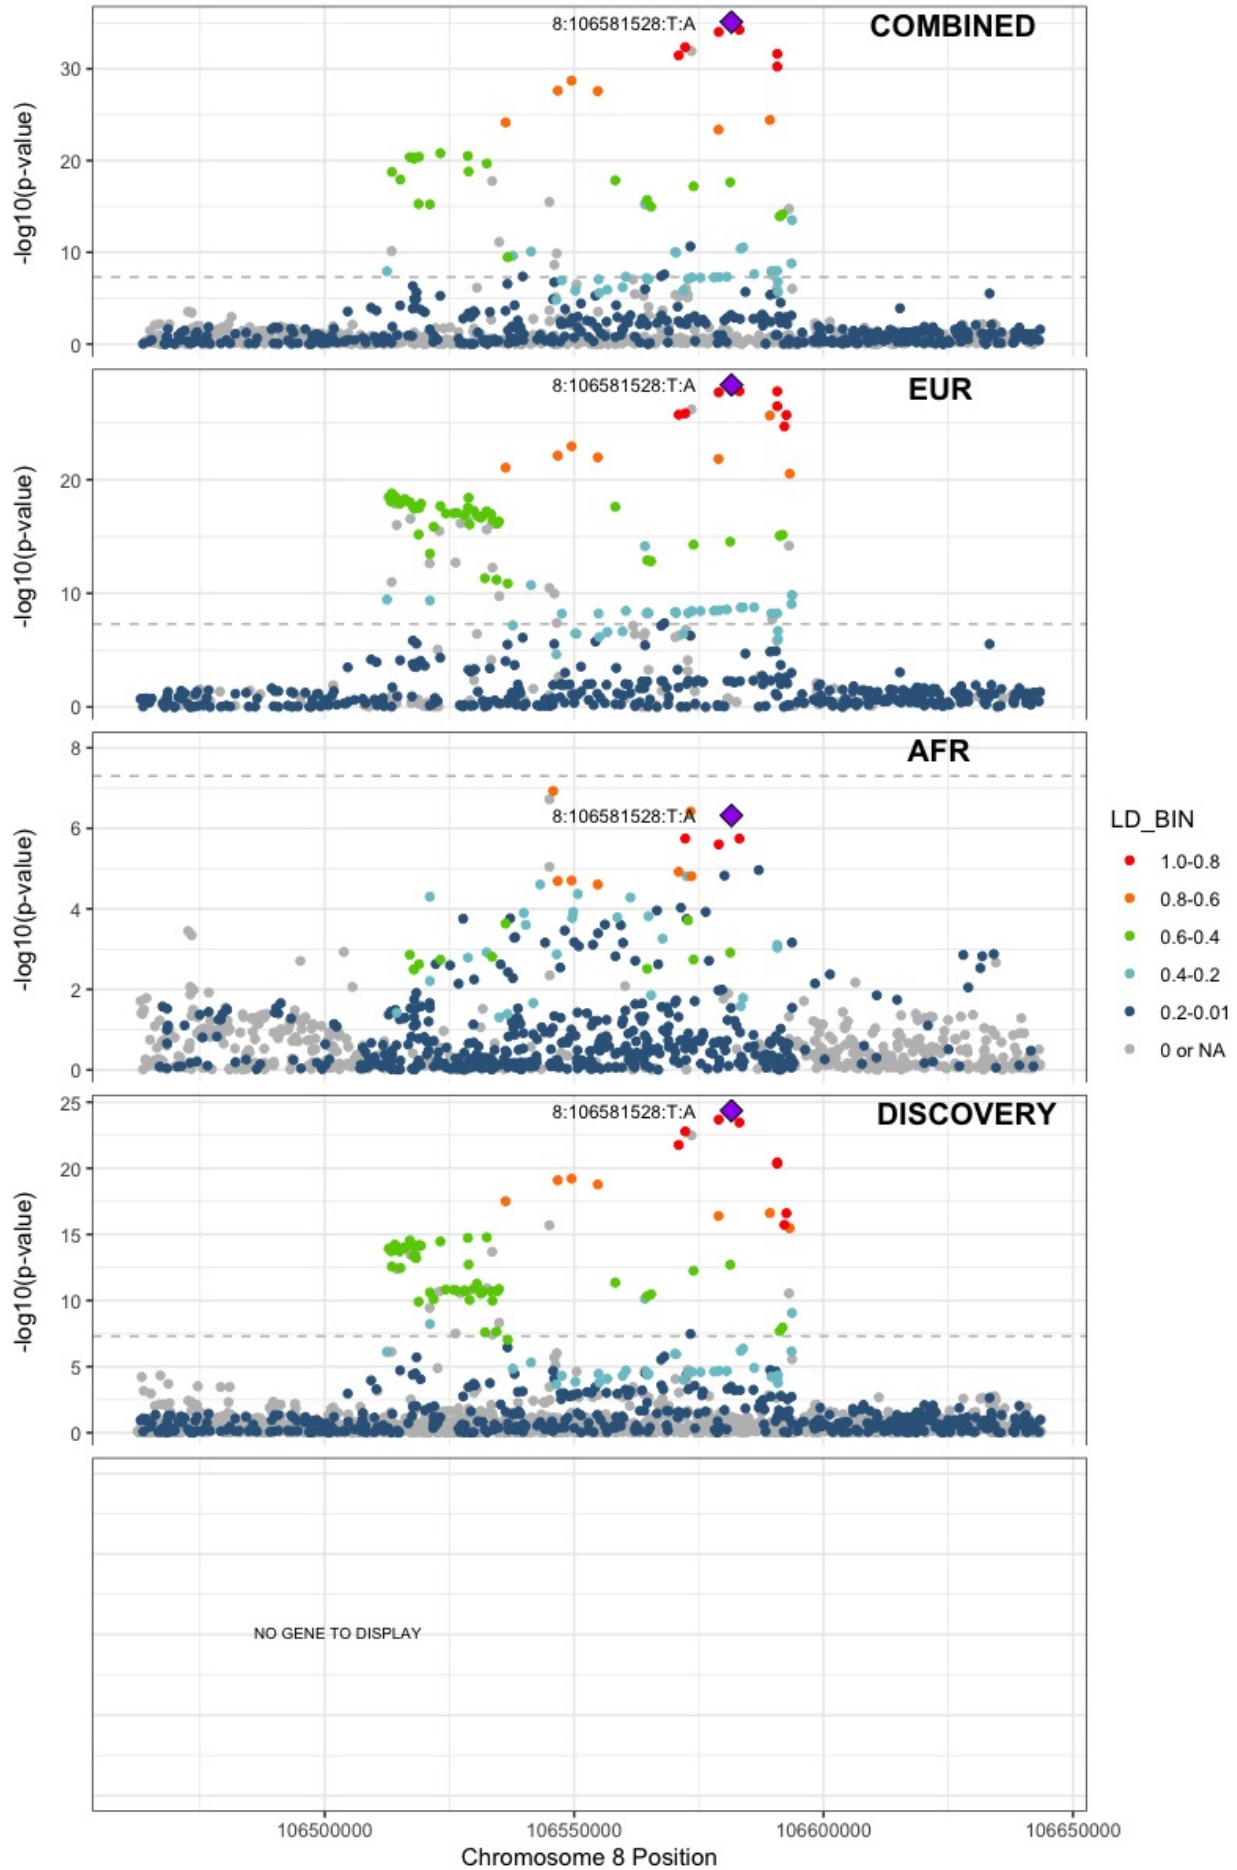

Supplementary Figure 6.50 – rs4236786 (chr8:108291878) in locus 63 (ANGPT1)

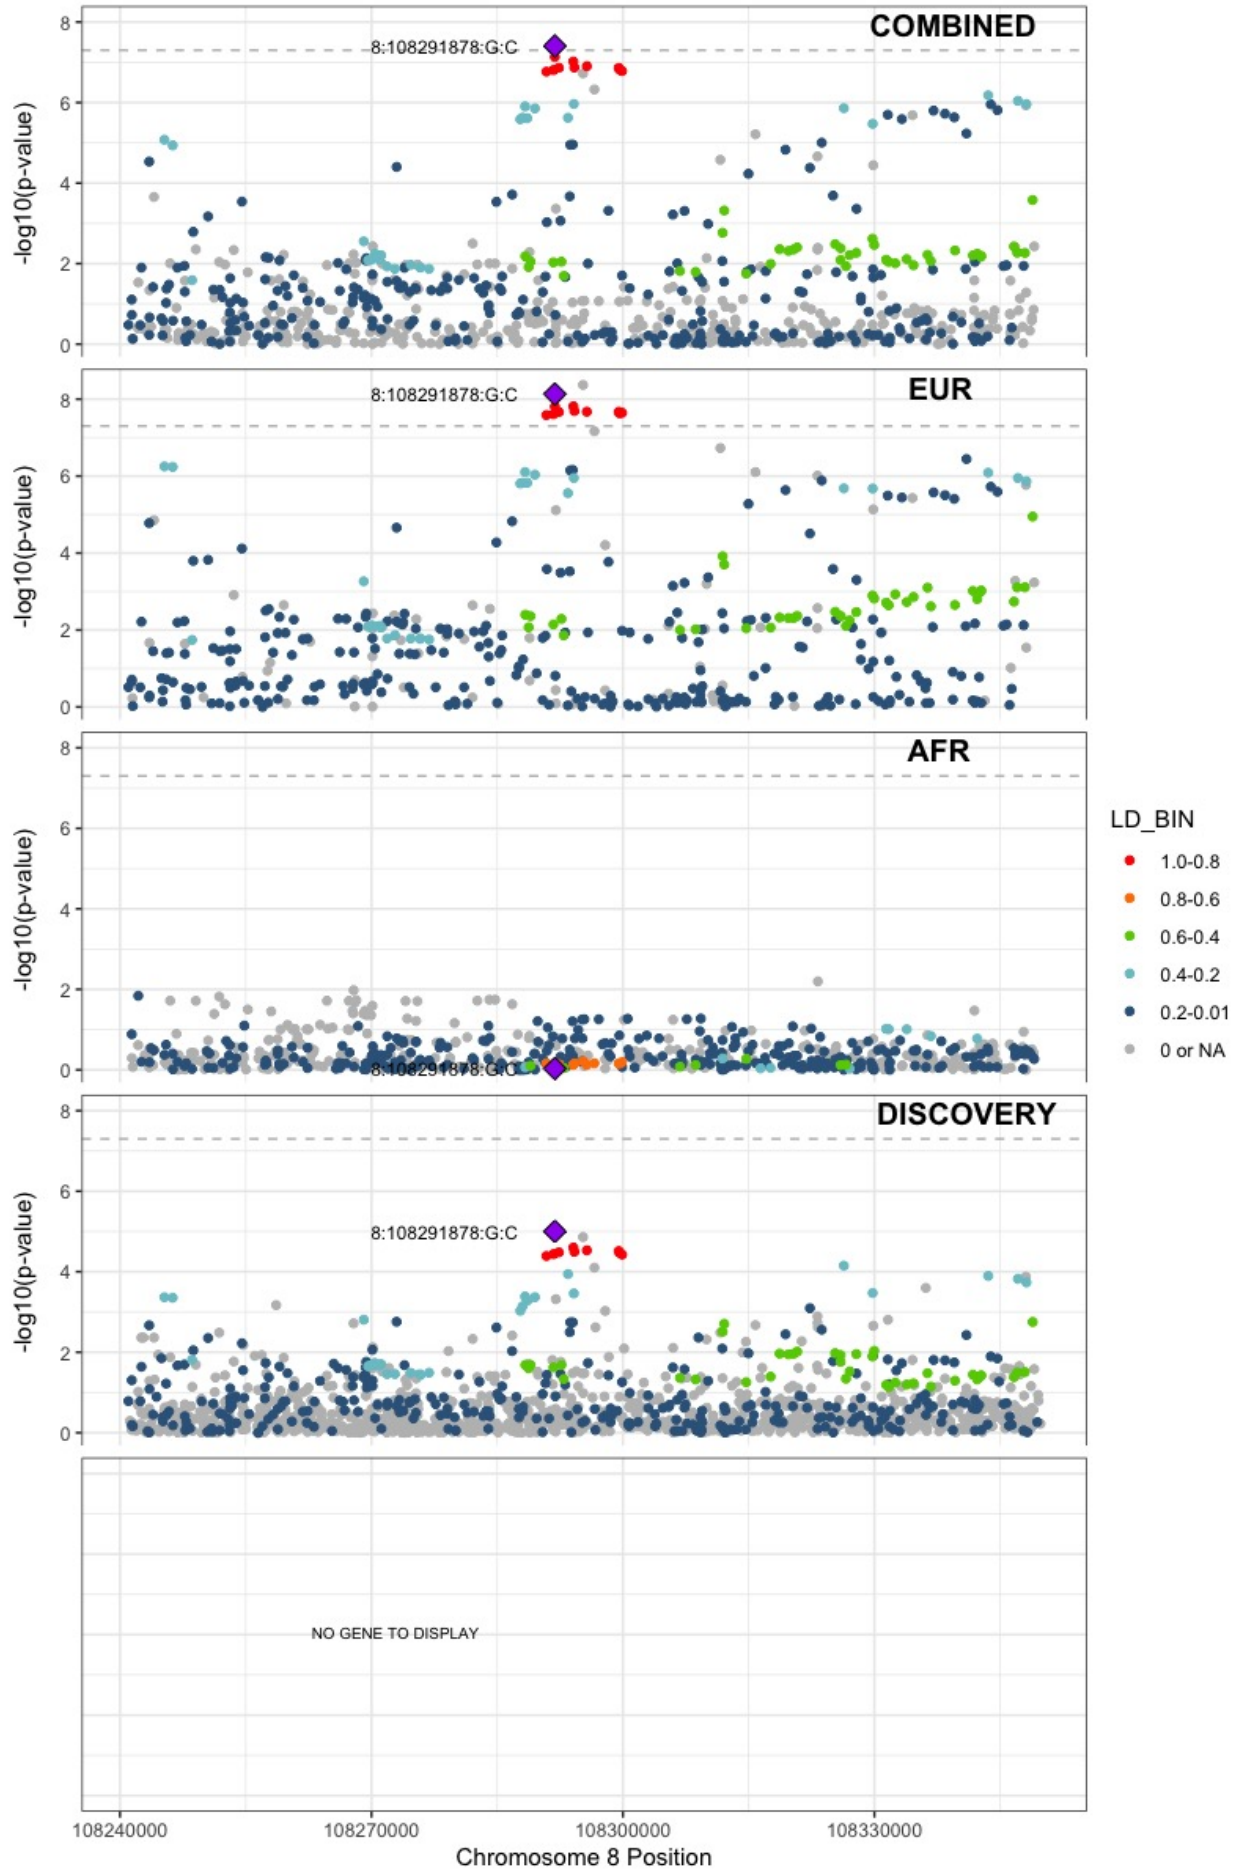

Supplementary Figure 6.51 – rs10820606 (chr9:99192919) in locus 65 (ZNF367;HABP4)

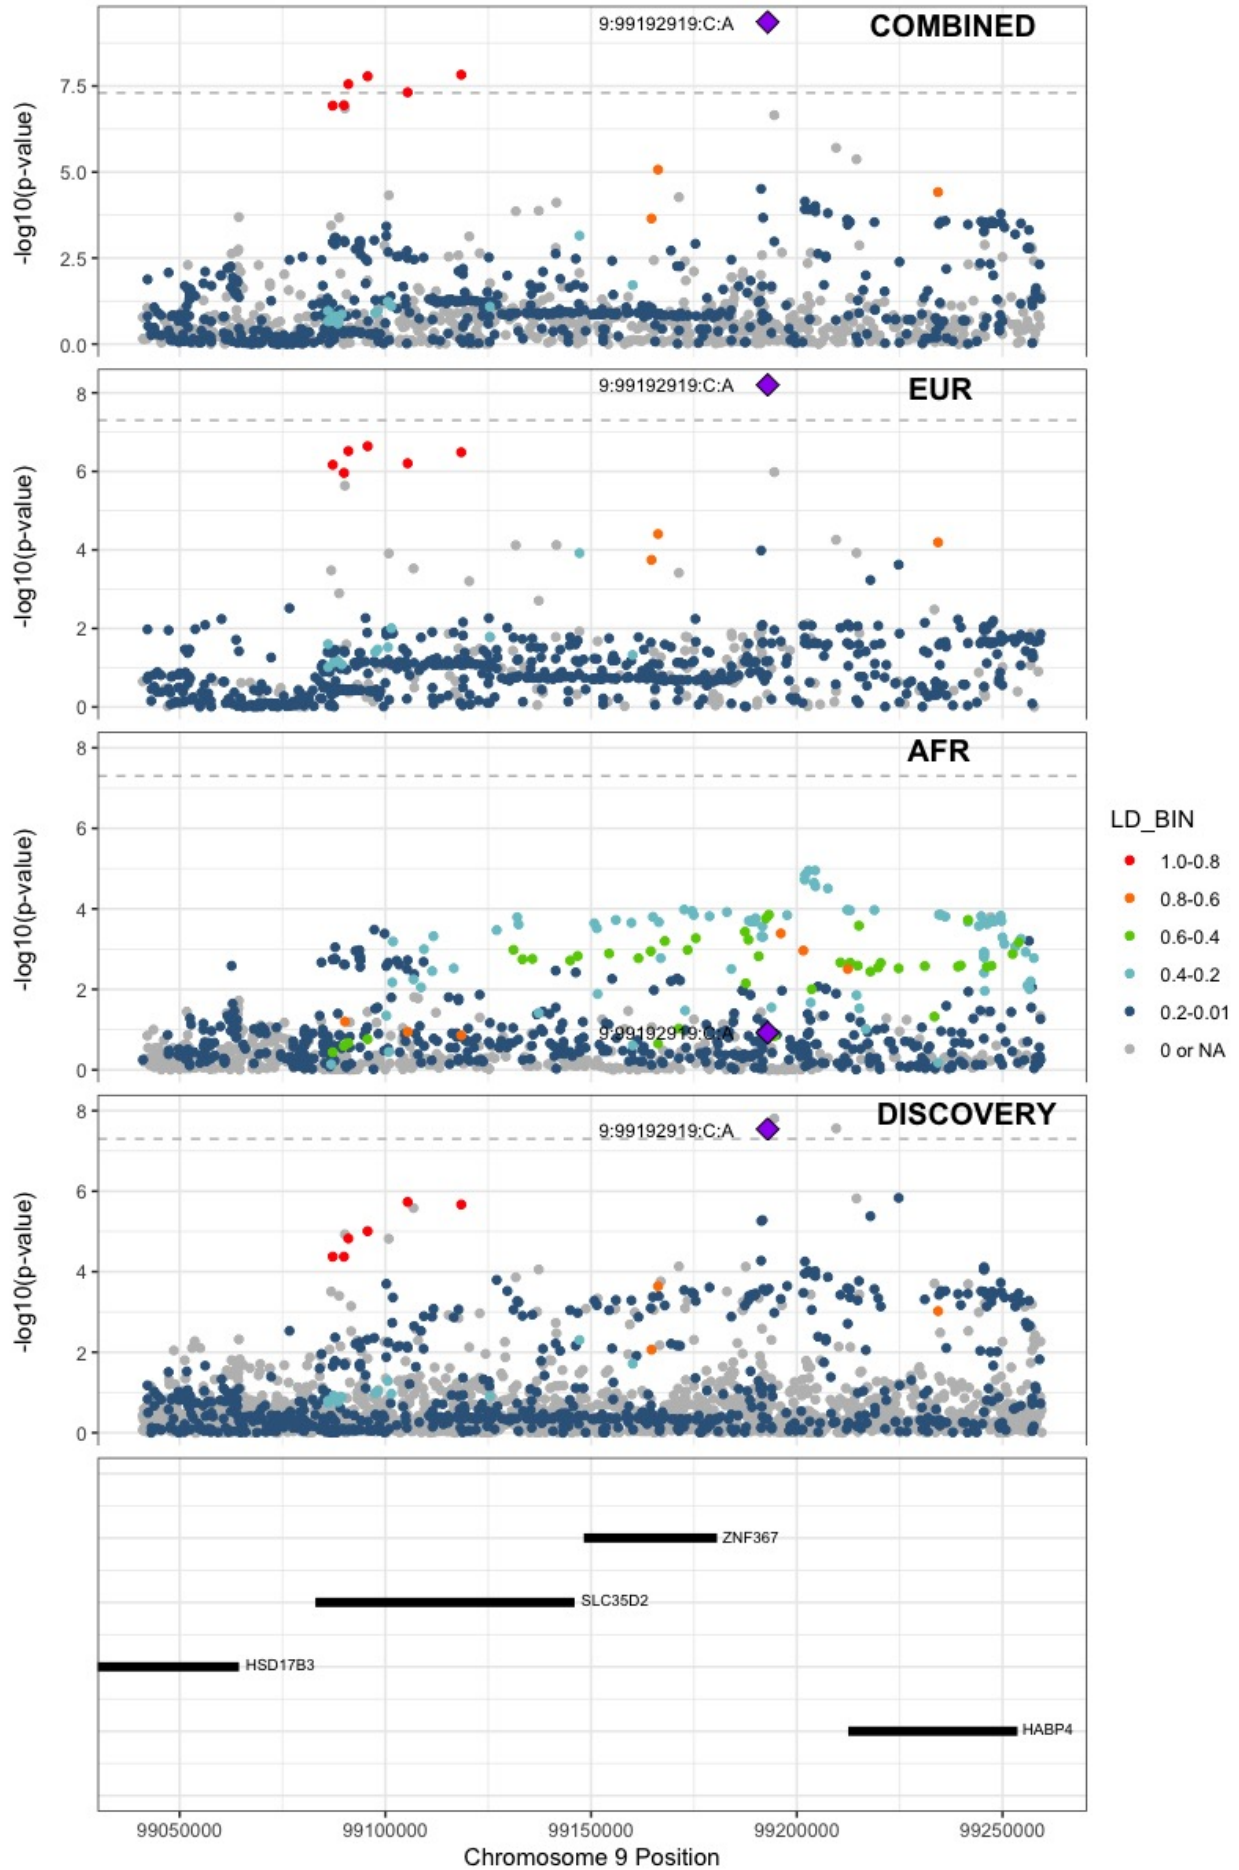

Supplementary Figure 6.52 – rs505922 (chr9:136149229) in locus 66 (ABO)

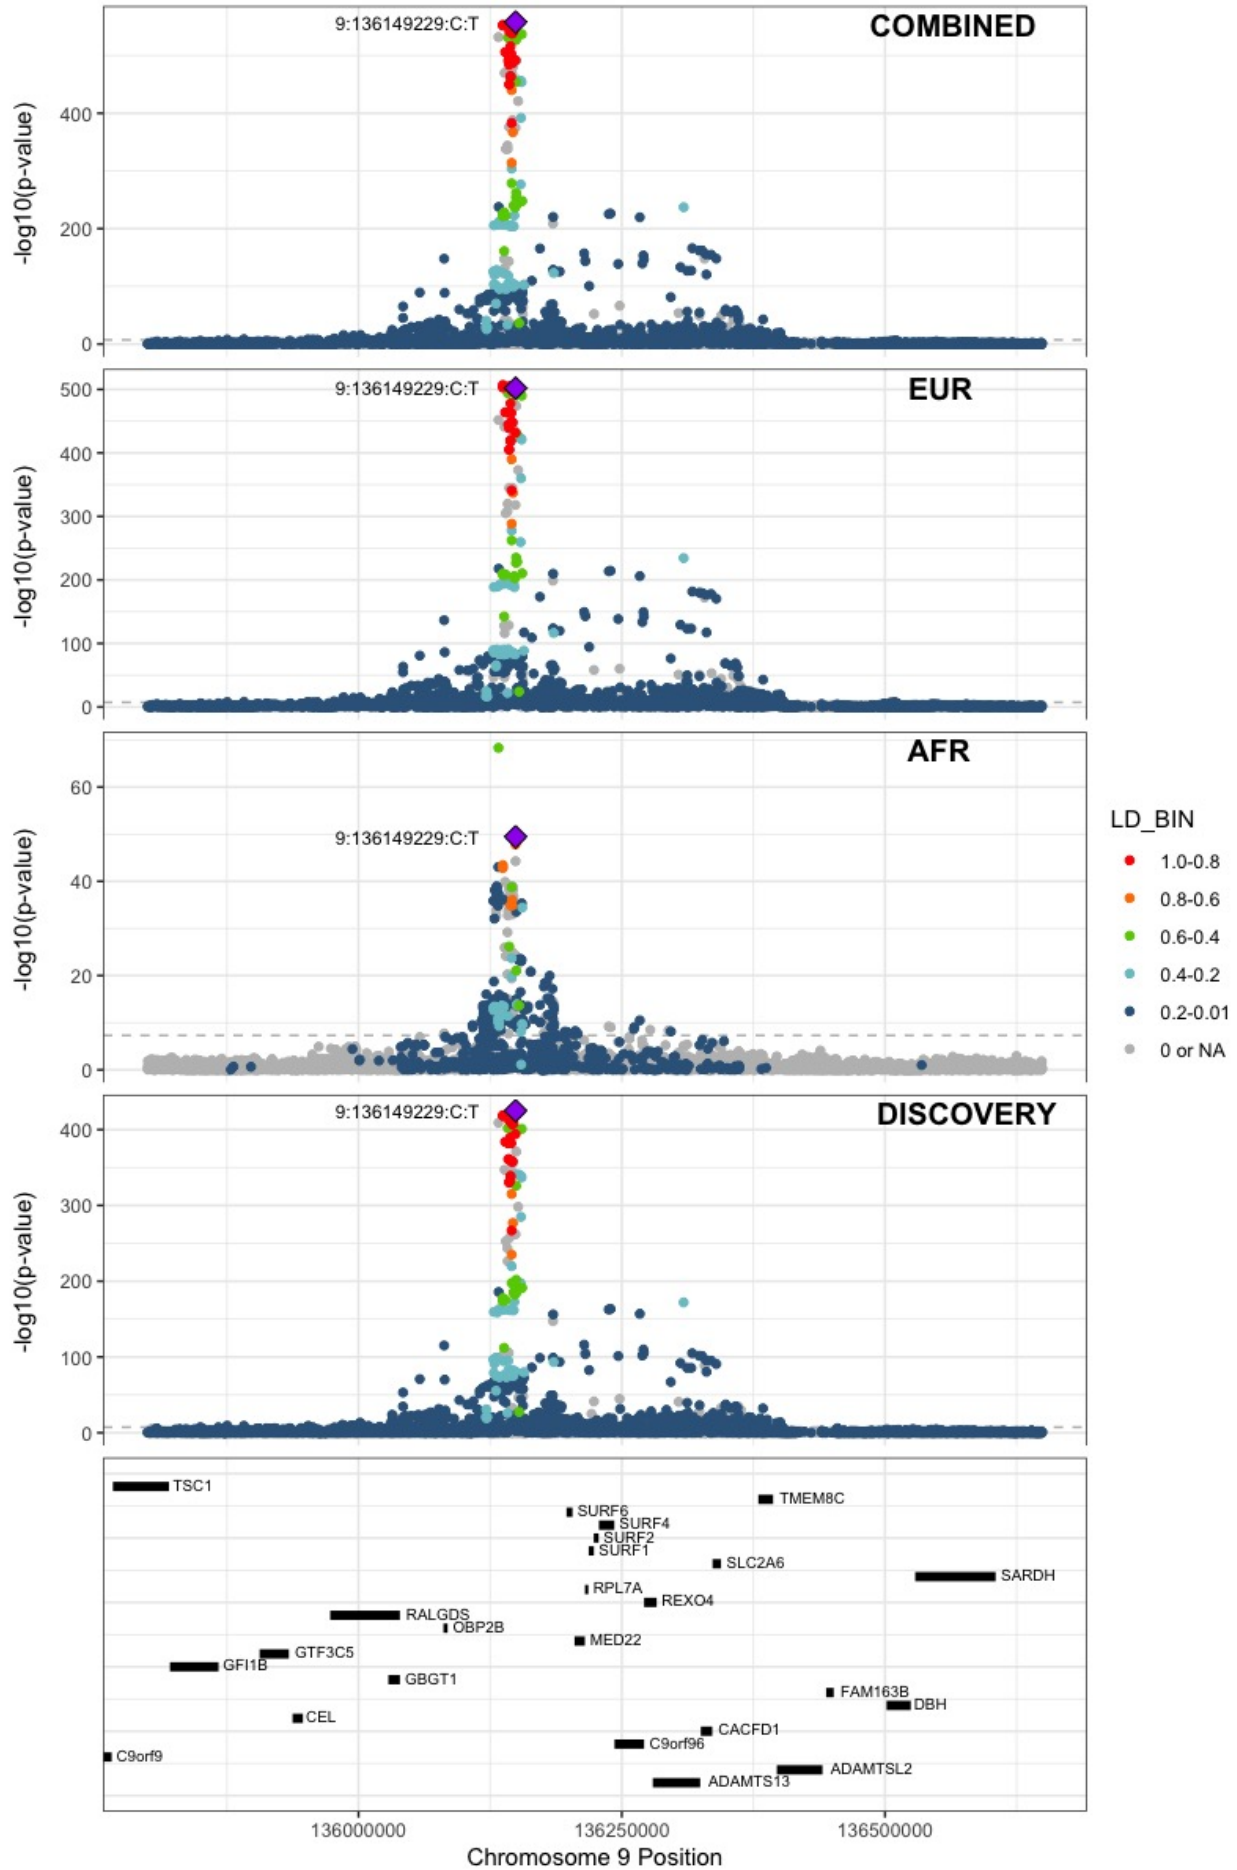

Supplementary Figure 6.53 – rs1243187 (chr10:21907016) in locus 68 (MLLT10)

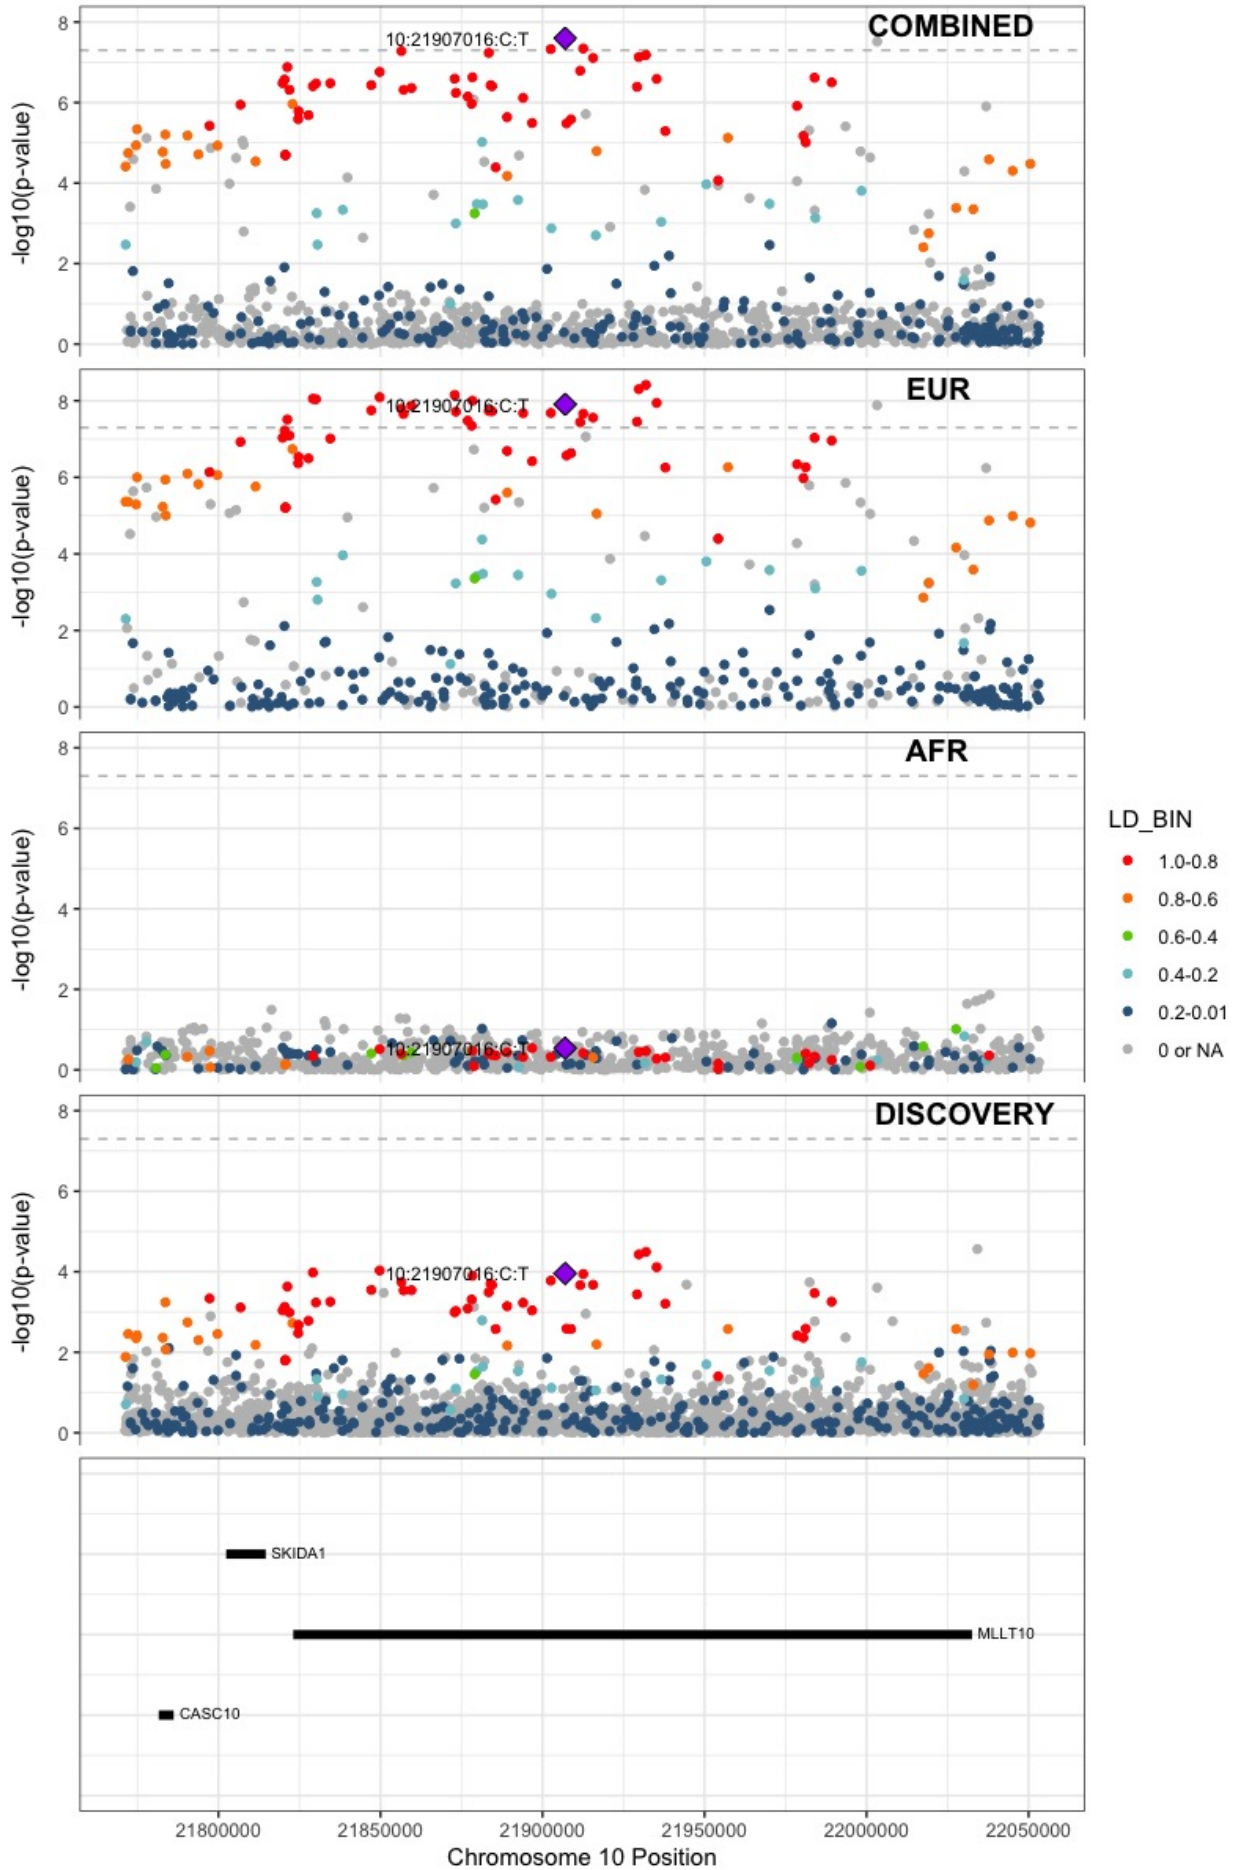



Supplementary Figure 6.54 – rs4272700 (chr10:27881308) in locus 69 (RAB18;MKX)

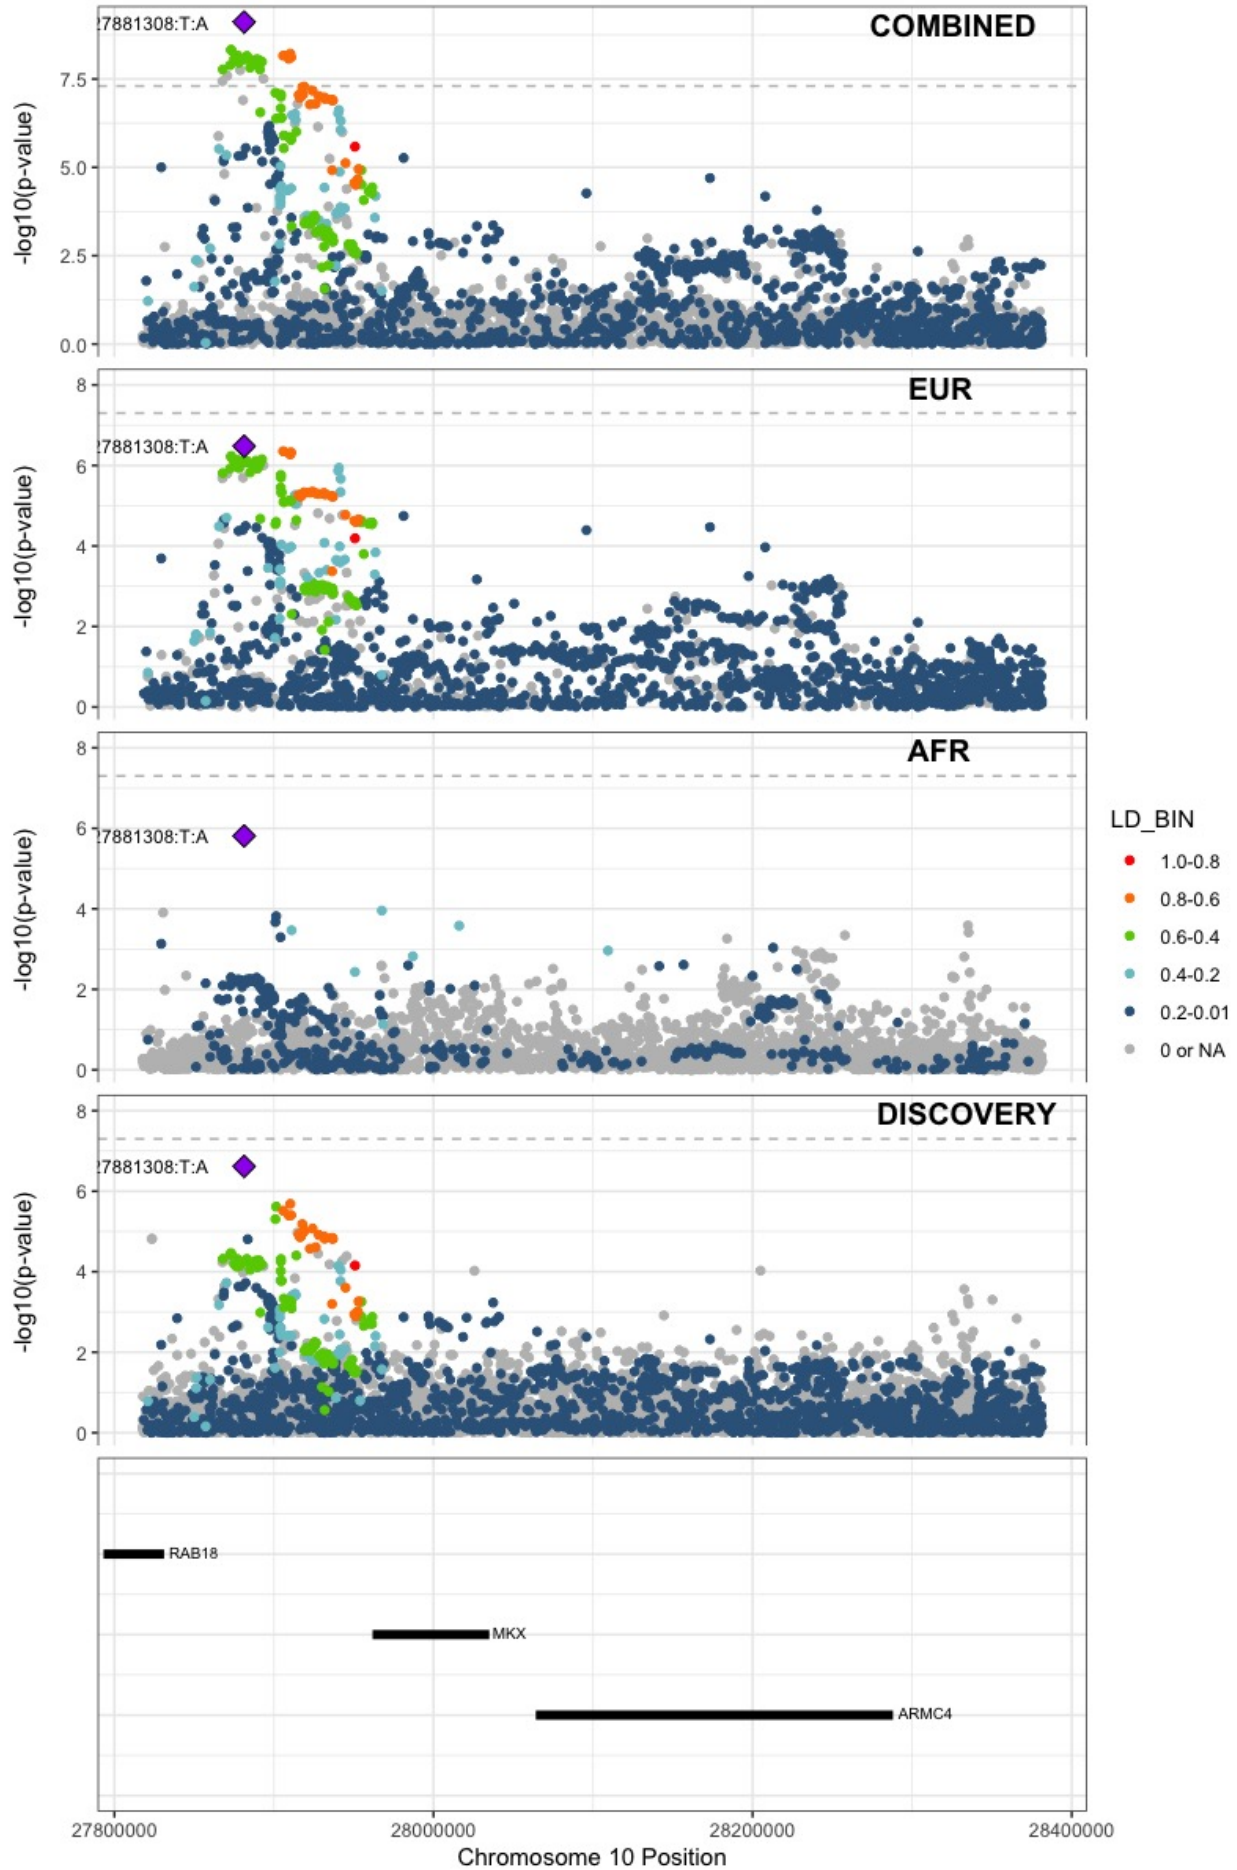

Supplementary Figure 6.55 – rs17490626 (chr10:71218646) in locus 72 (TSPAN15)

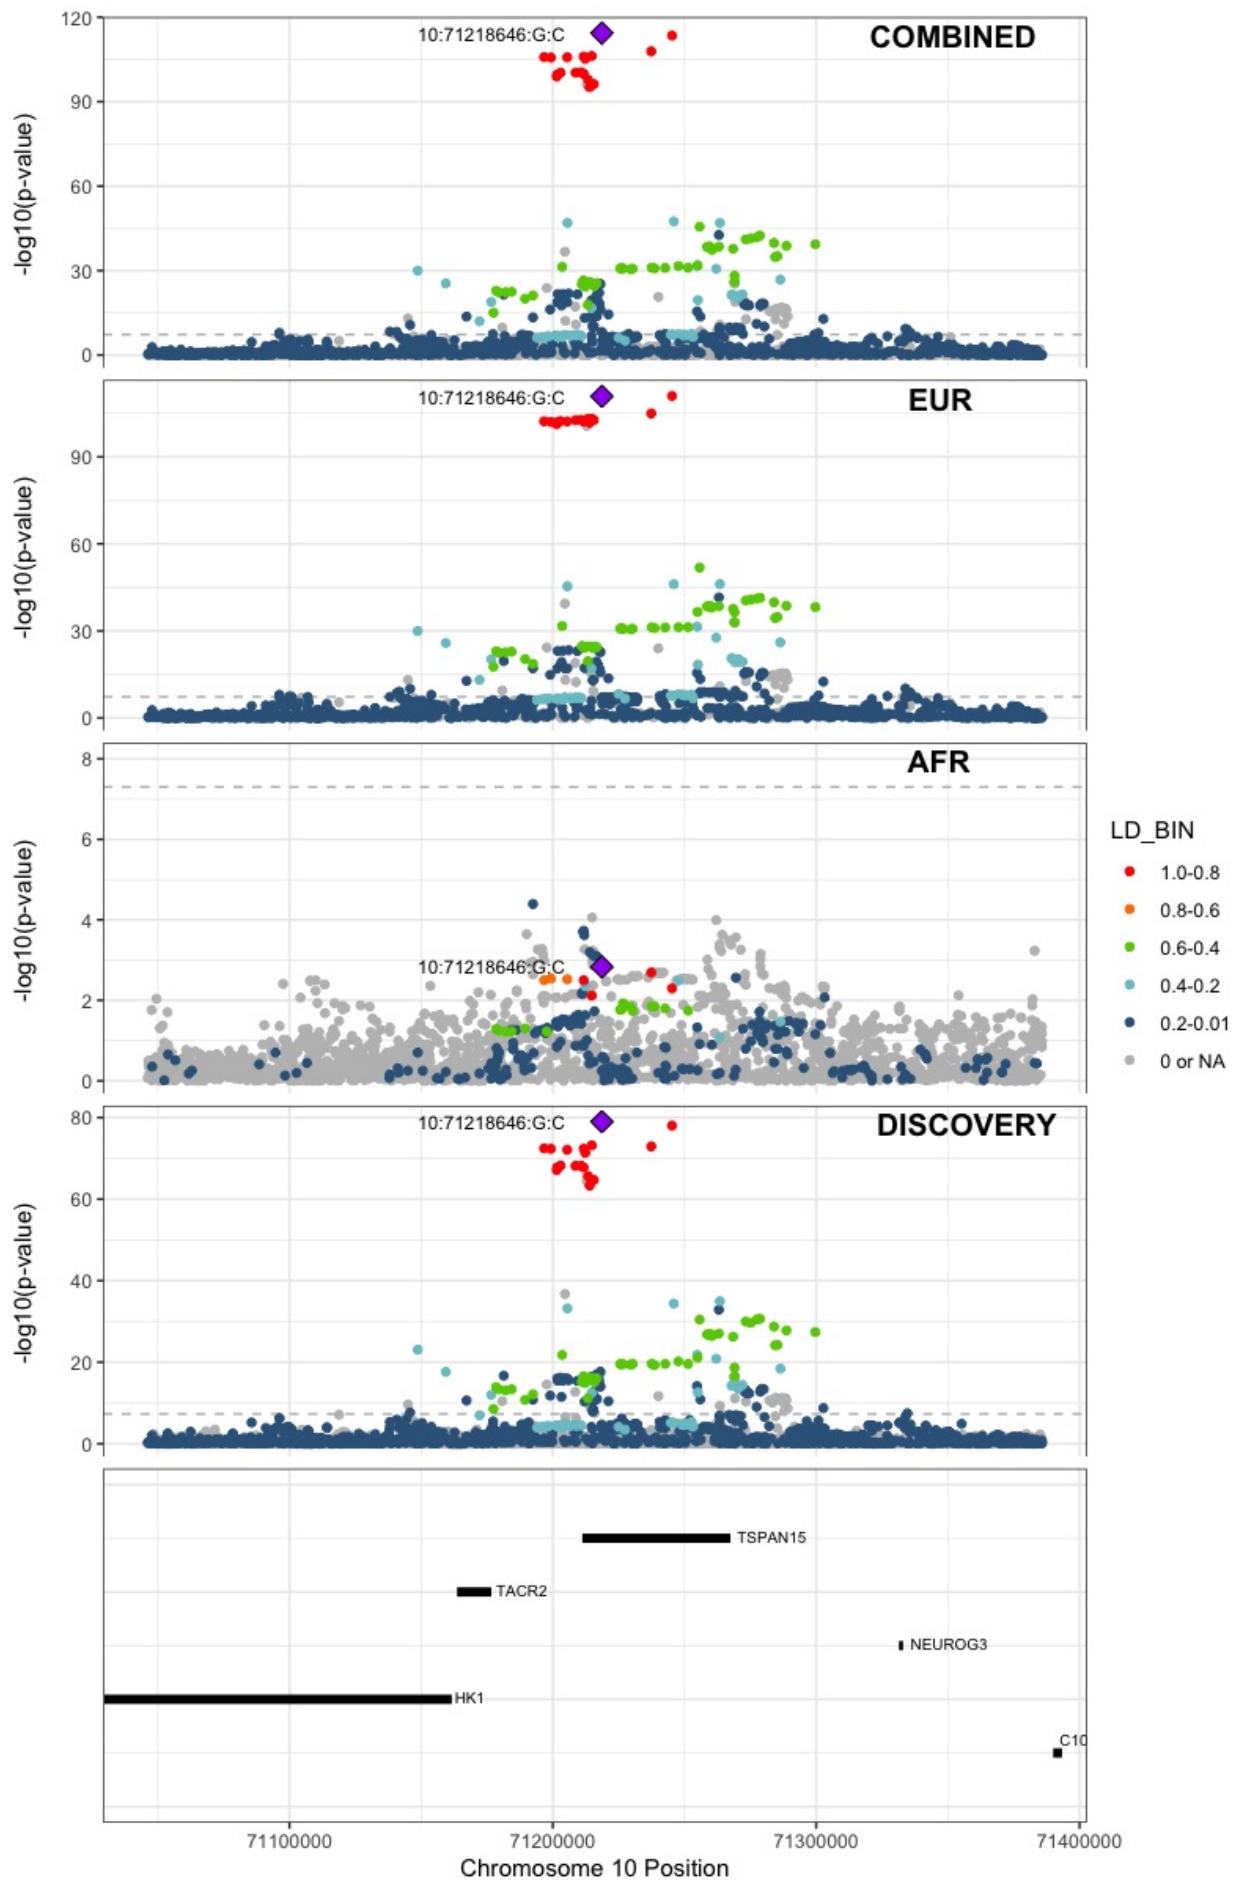

Supplementary Figure 6.56 – rs16937003 (chr10:80938499) in locus 73 (ZMIZ1)

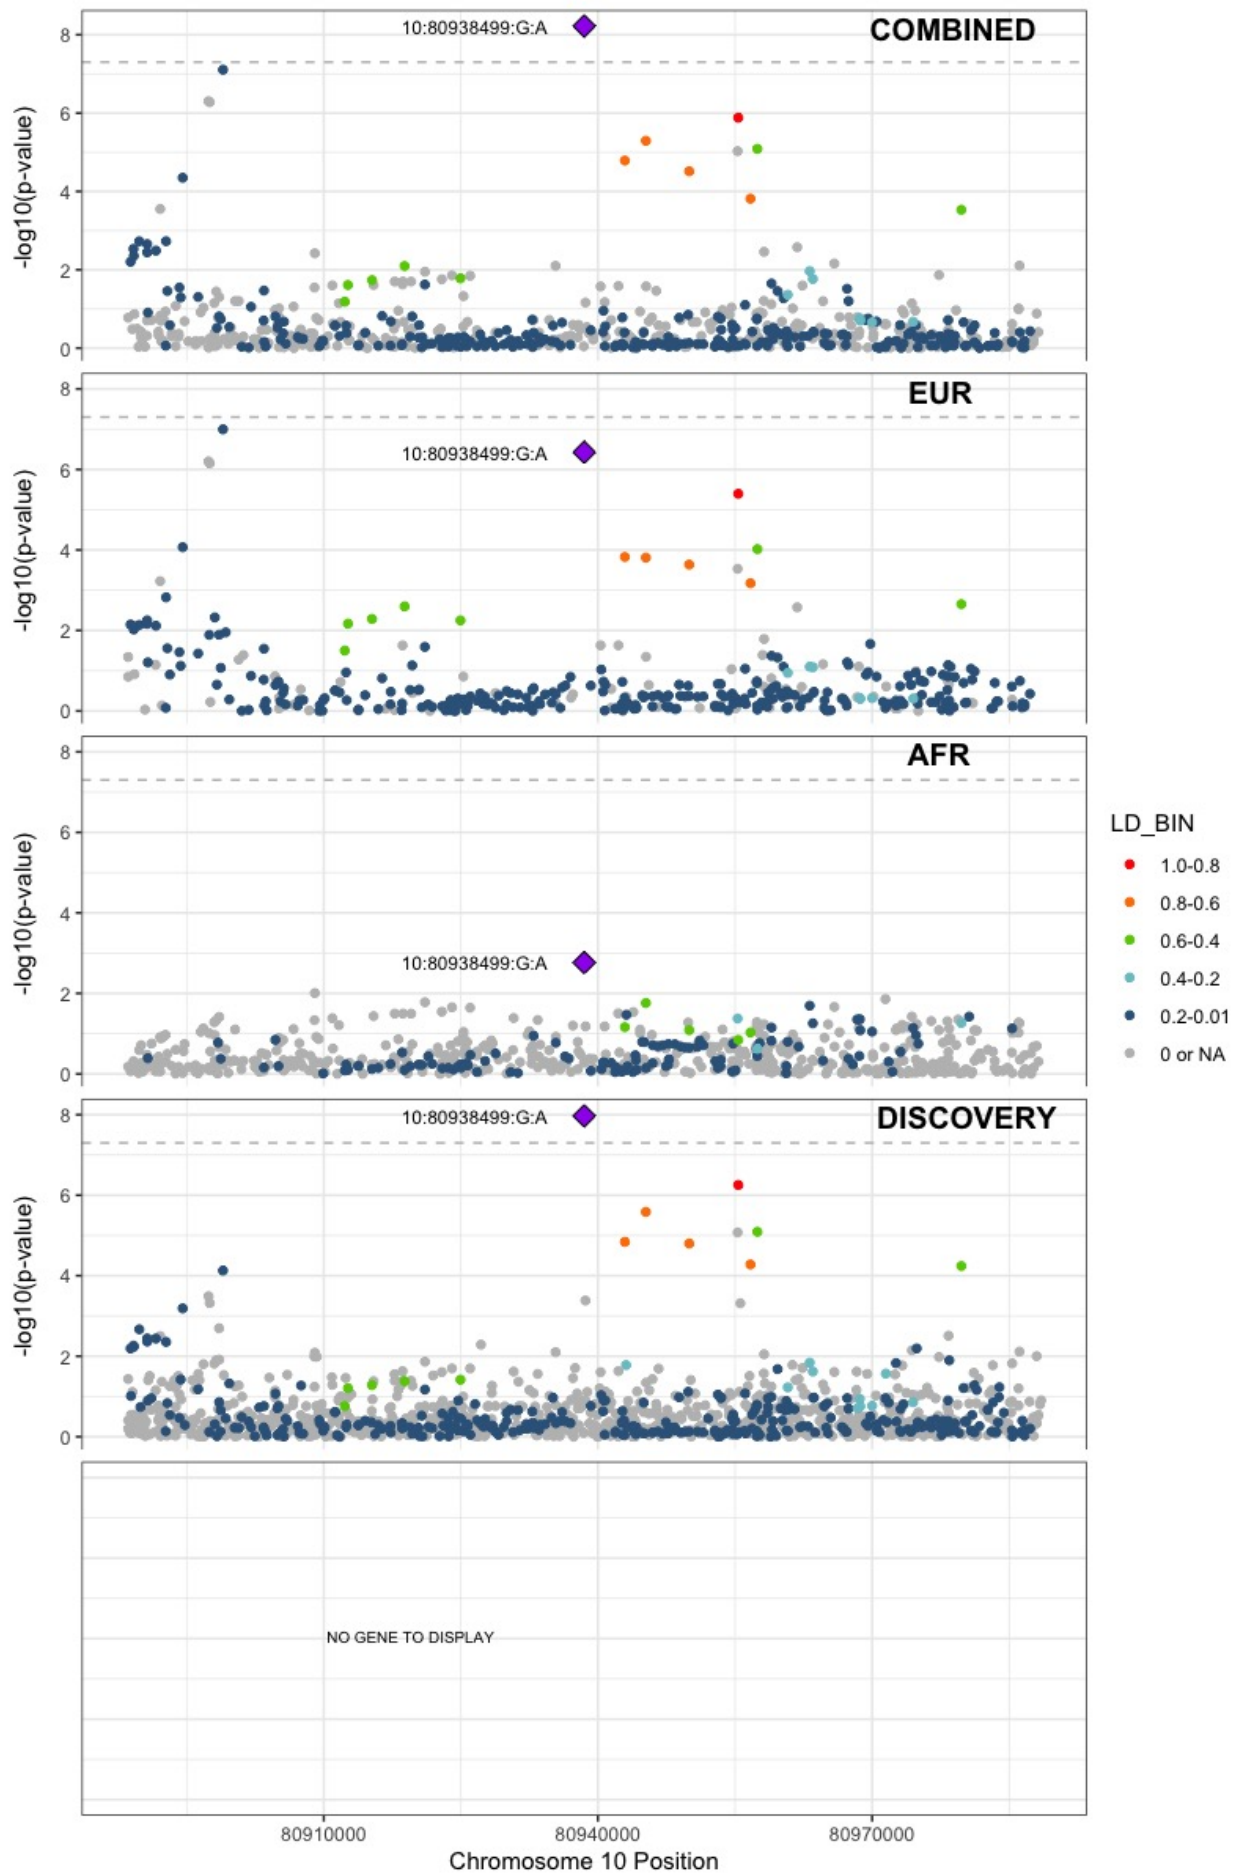

Supplementary Figure 6.57 – rs57866767 (chr10:96023077) in locus 74 (PLCE1)

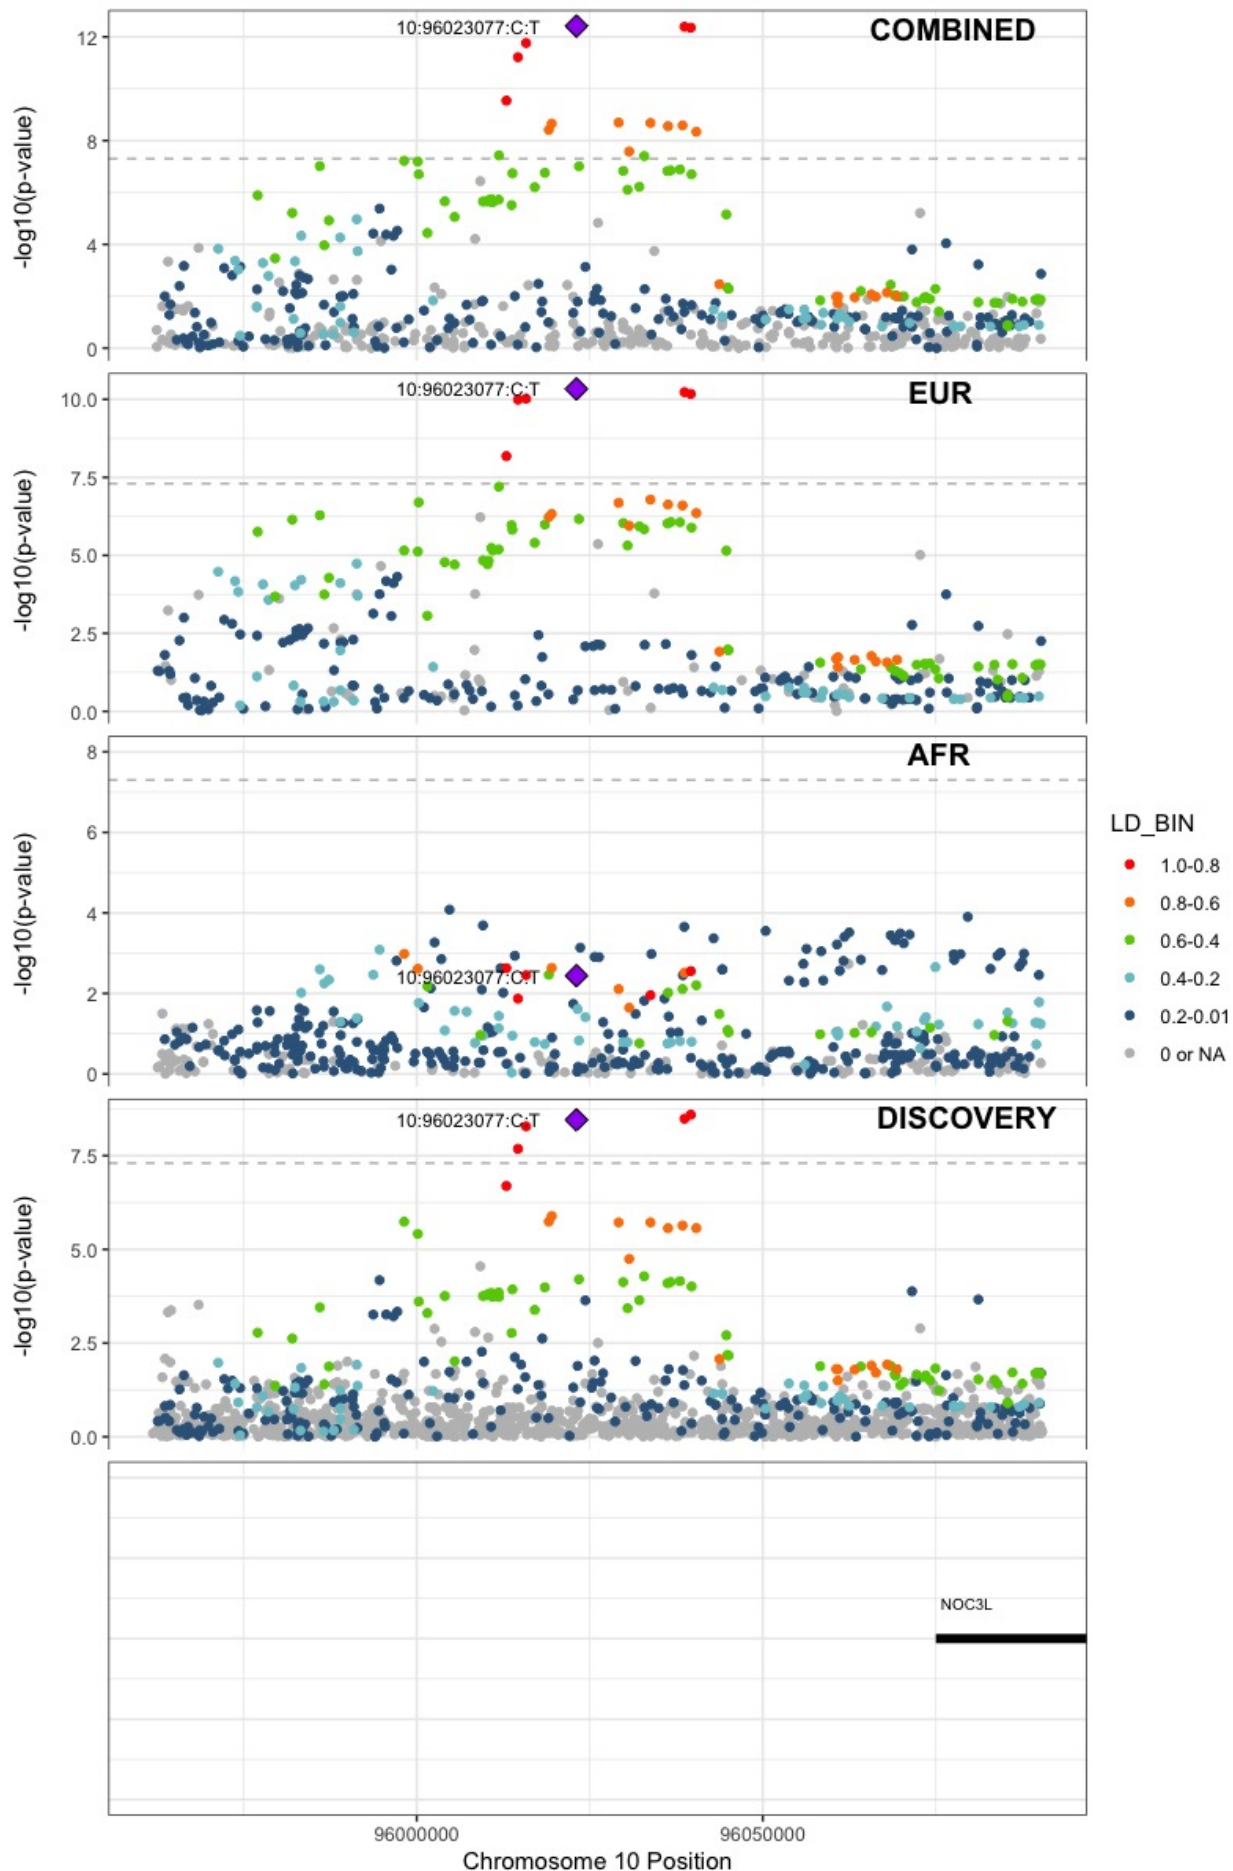

Supplementary Figure 6.58 – rs10886430 (chr10:121010256) in locus 75 (GRK5)

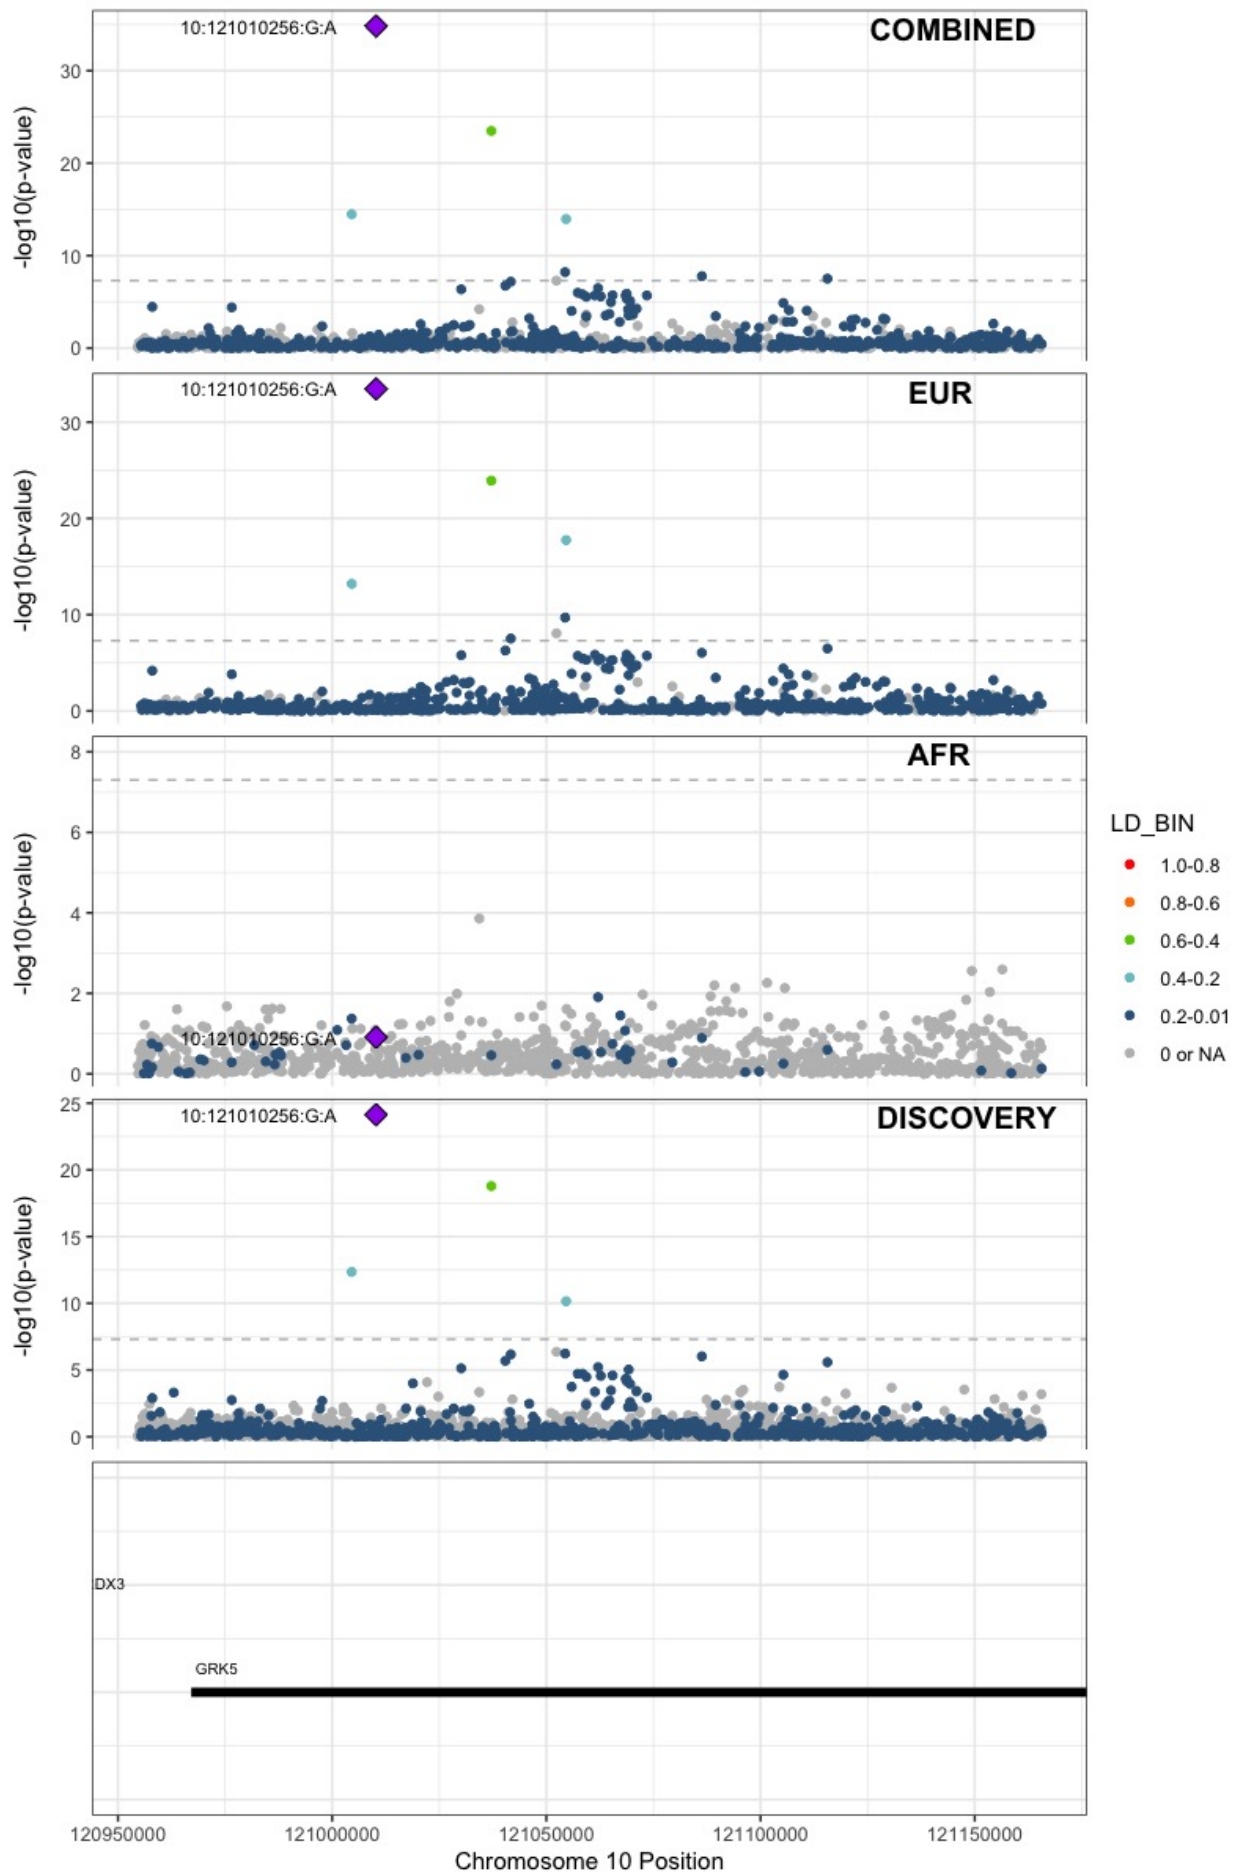

Supplementary Figure 6.59 – rs2030291 (chr11:16251251) in locus 77 (SOX6)

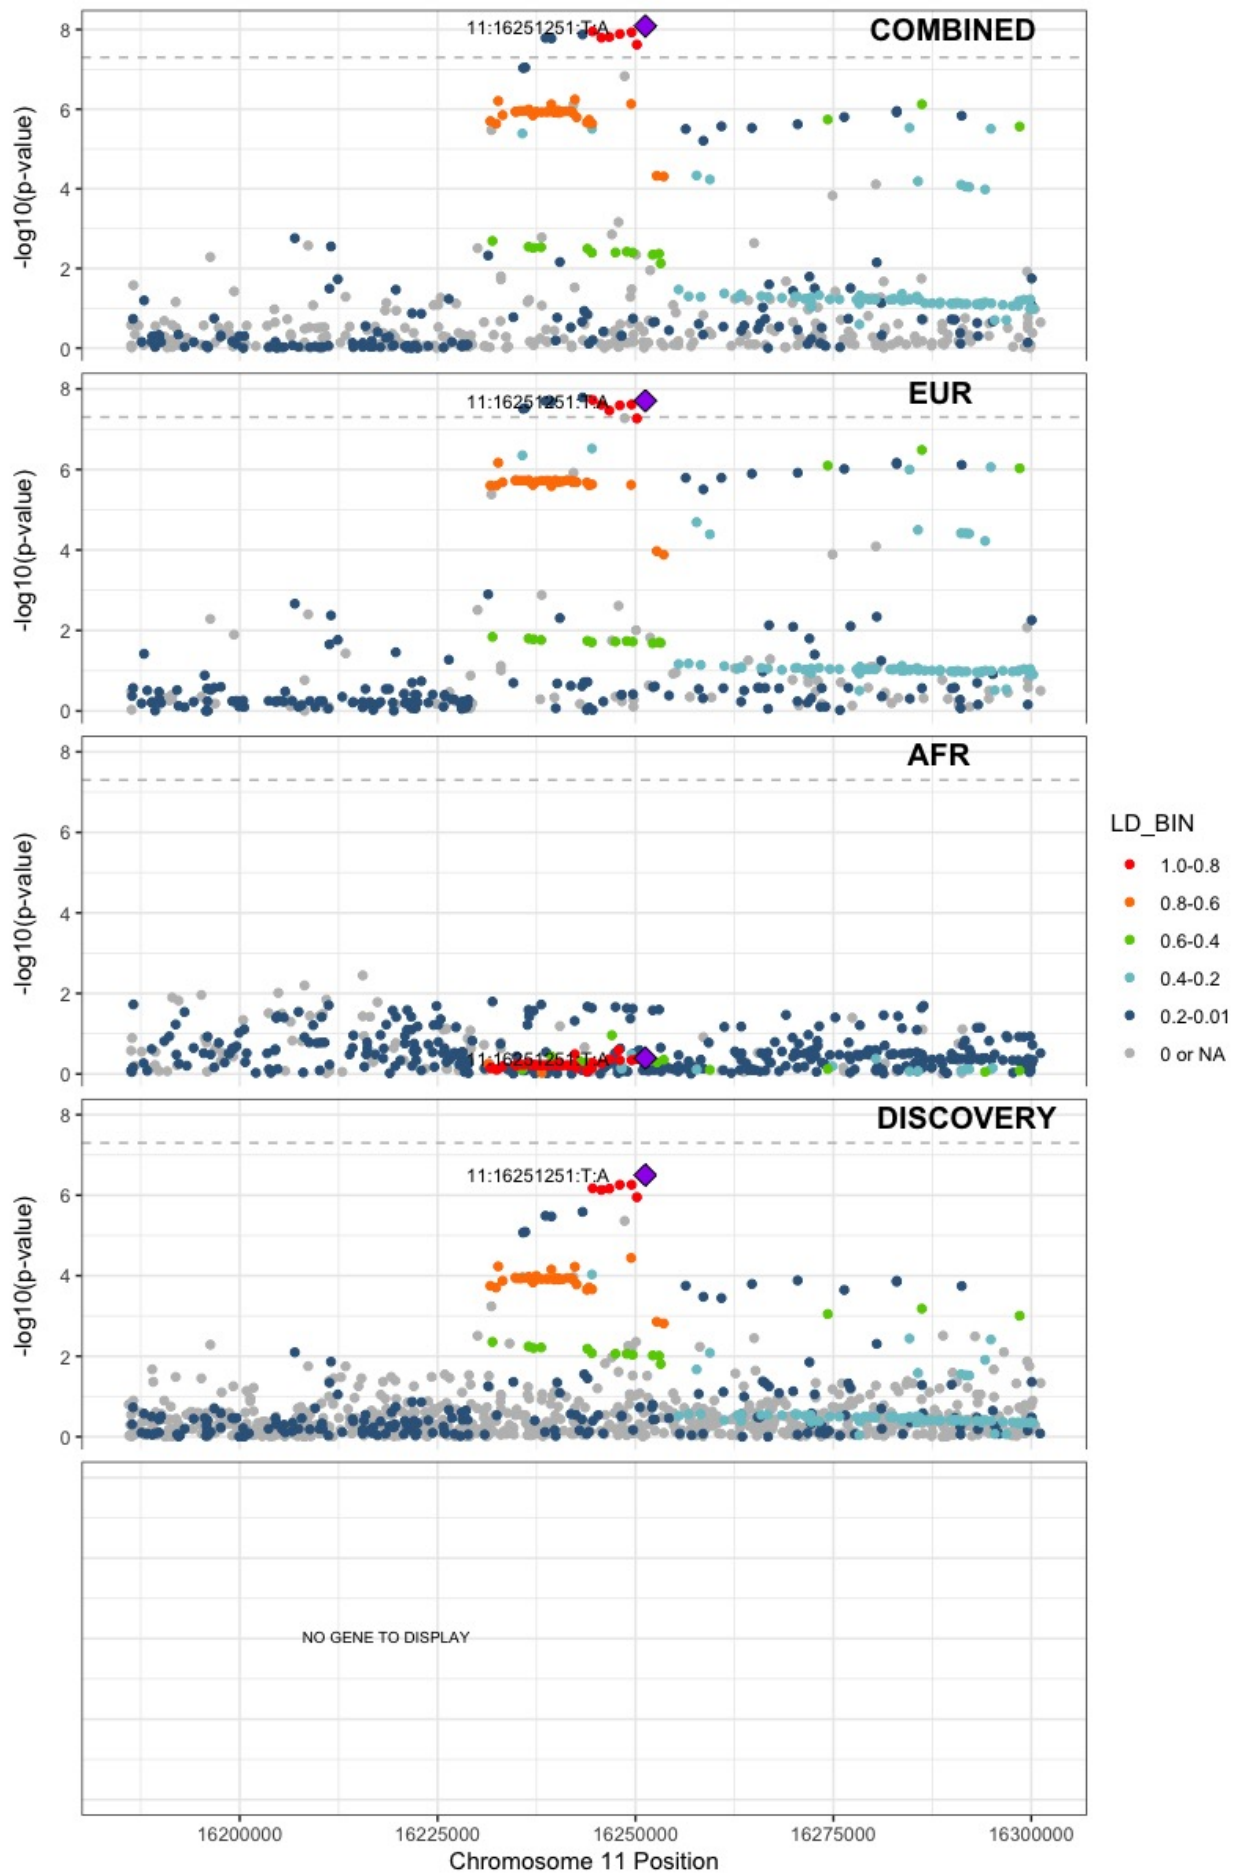

Supplementary Figure 6.60 – rs11032074 (chr11:32993887) in locus 78 (QSER1)

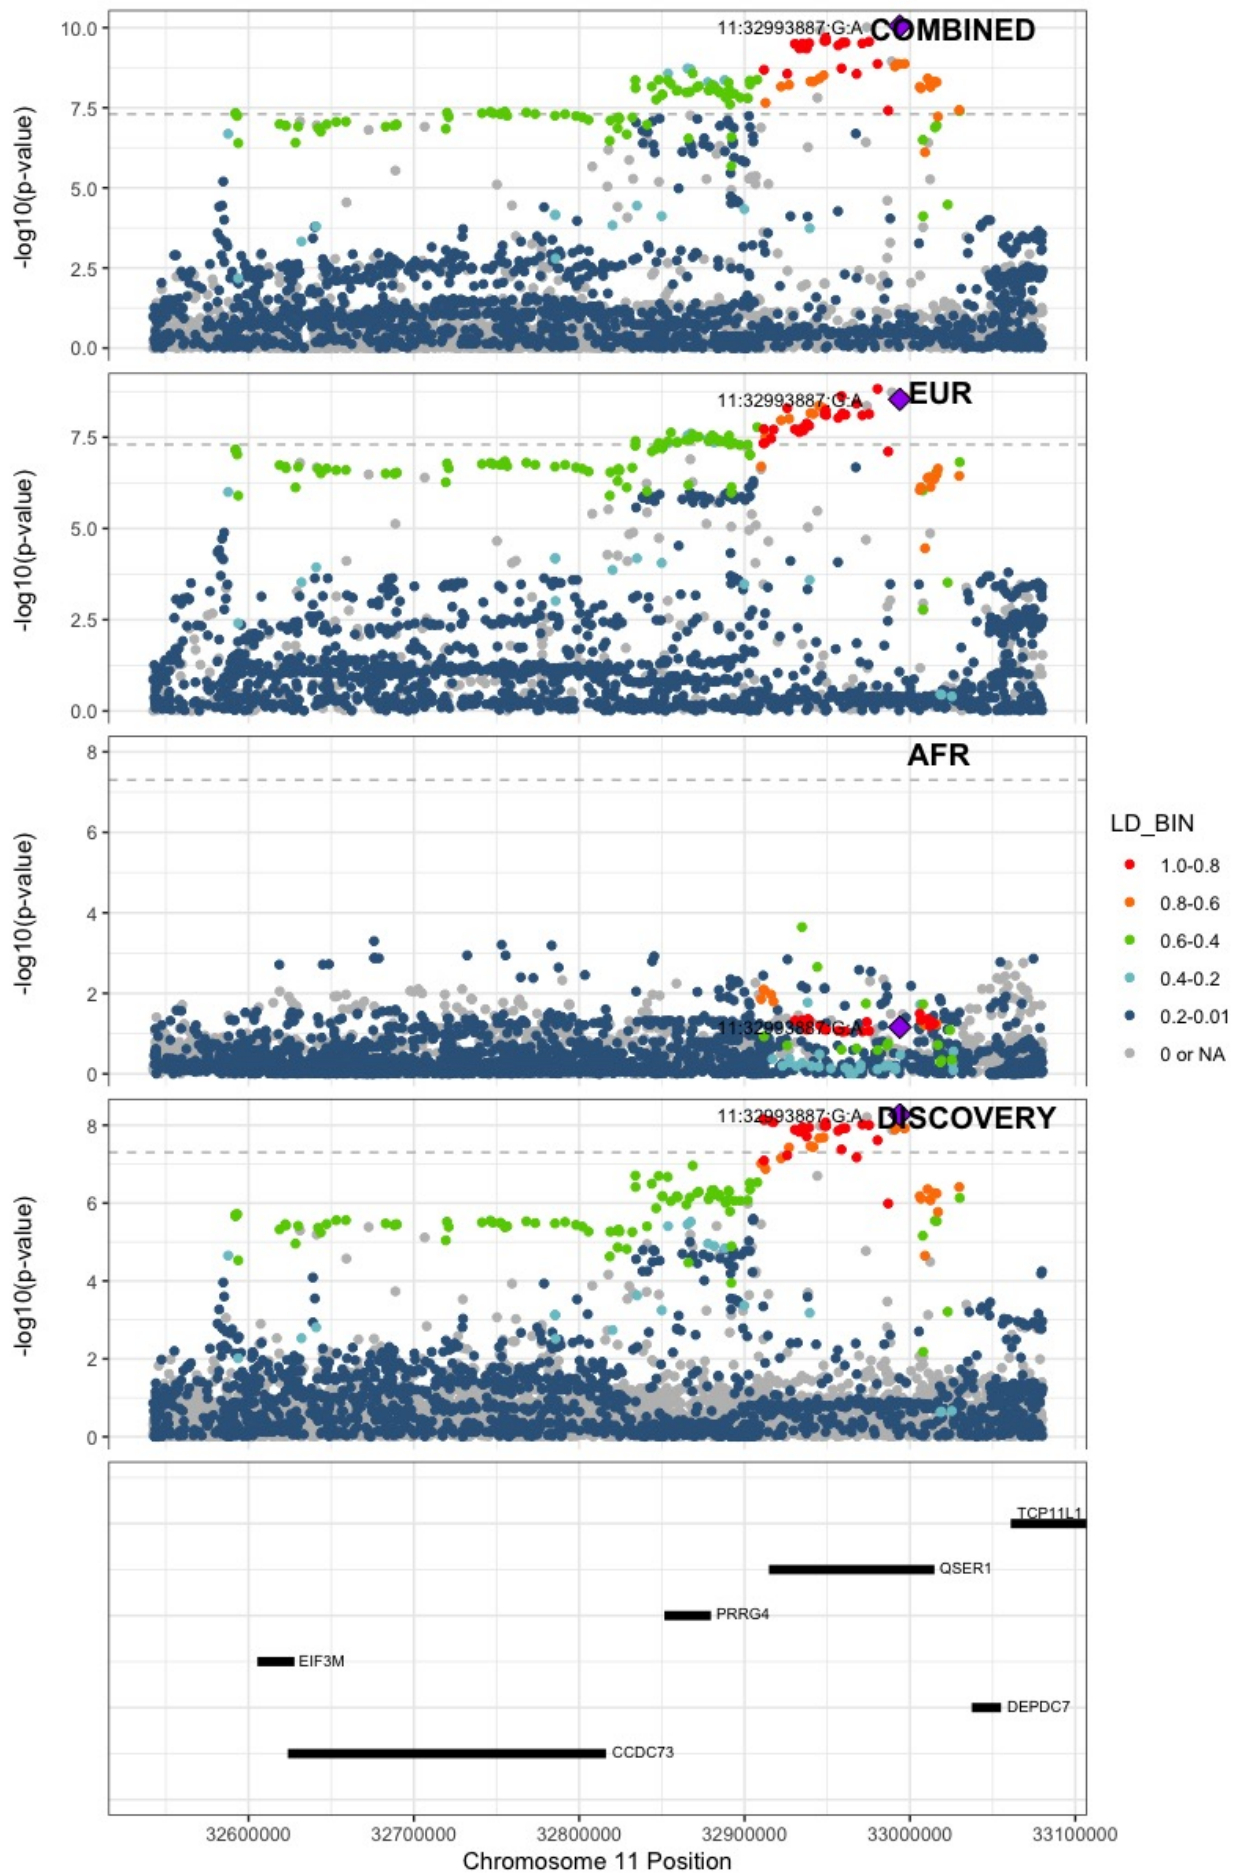

Supplementary Figure 6.61 – rs1799963 (chr11:46761055) in locus 79 (F2)

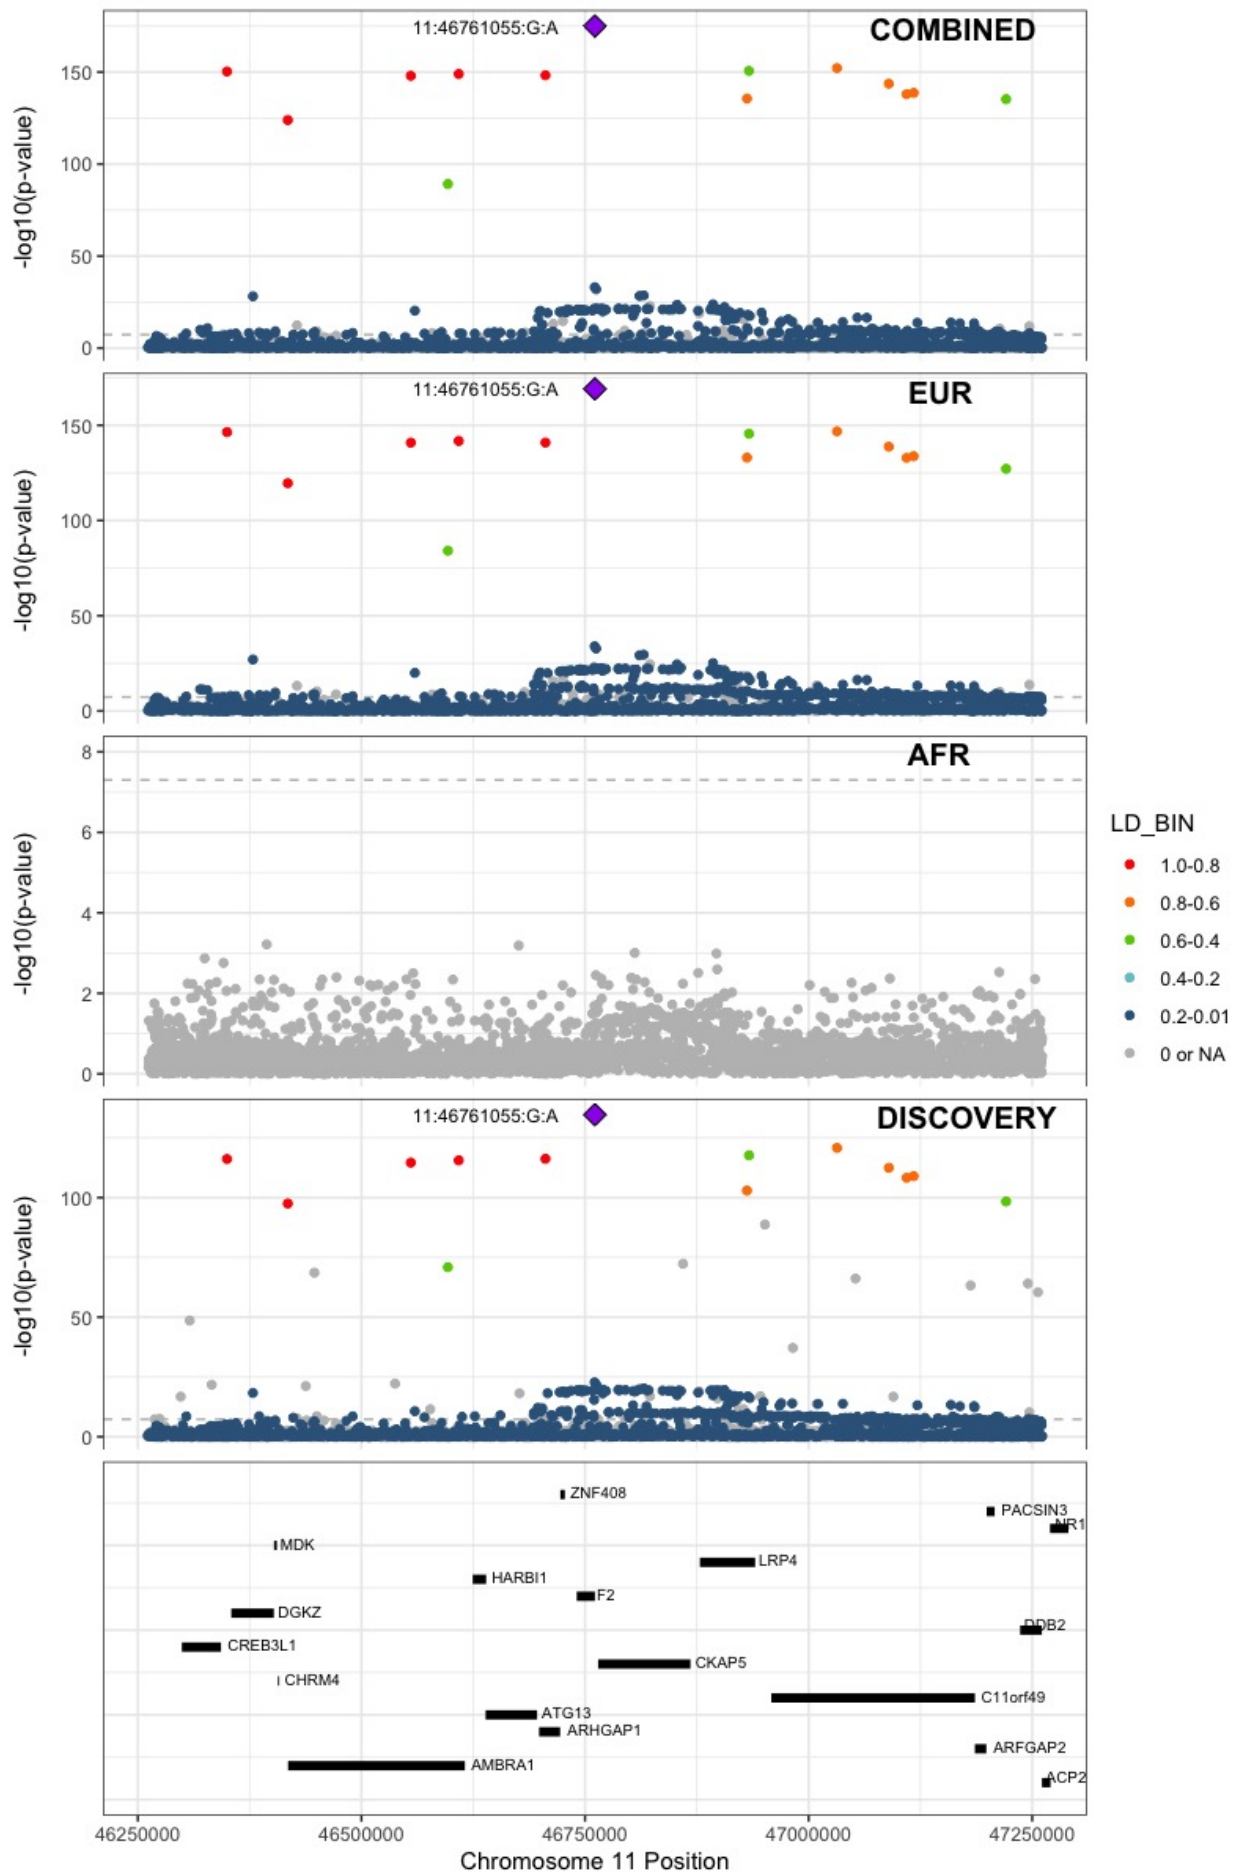



Supplementary Figure 6.62 – rs141798115 (chr11:56875074) in locus 80 (OR5AK4P ;LRRC55)

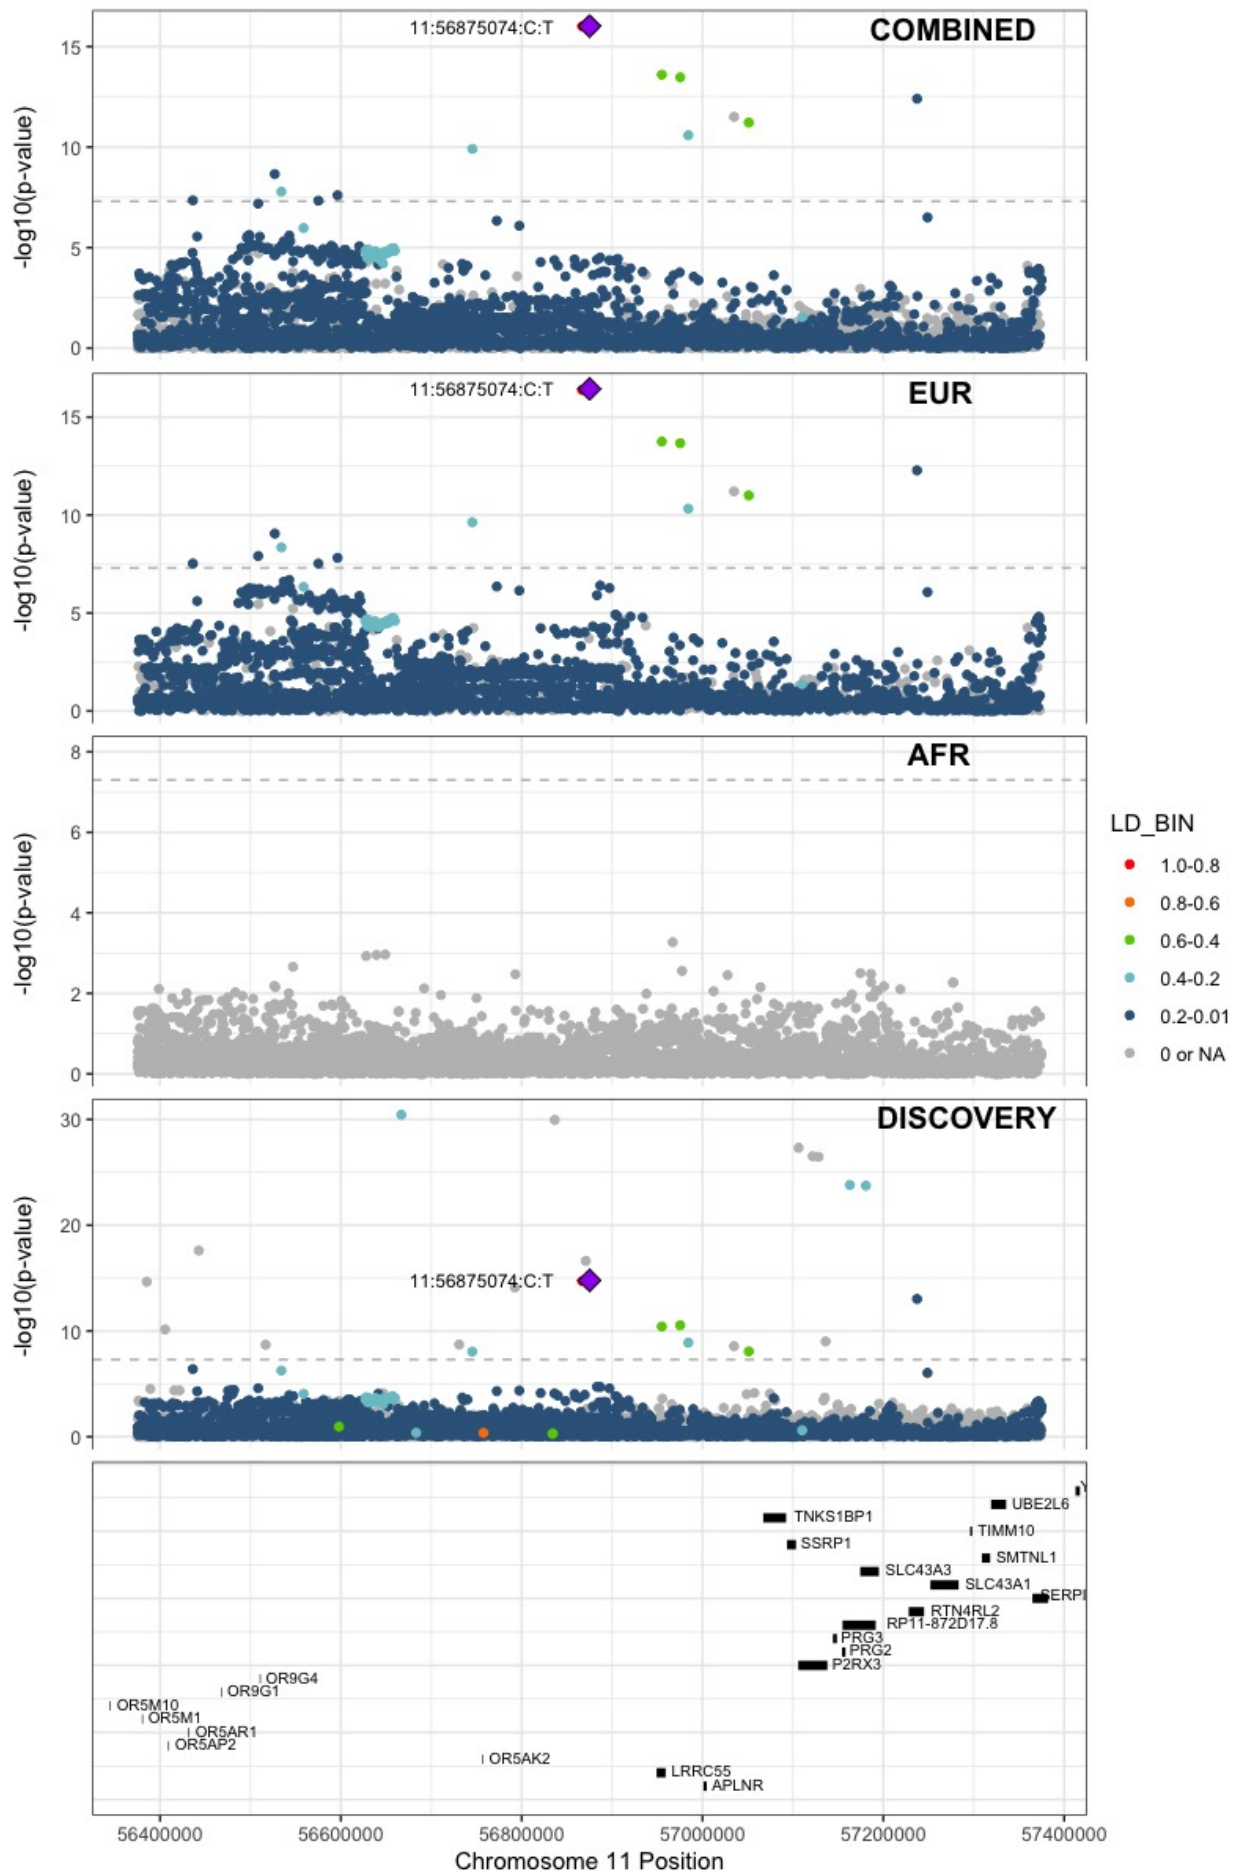

Supplementary Figure 6.63 – rs4354705 (chr11:60088159) in locus 81 (MS4A4A ;MS4A6E)

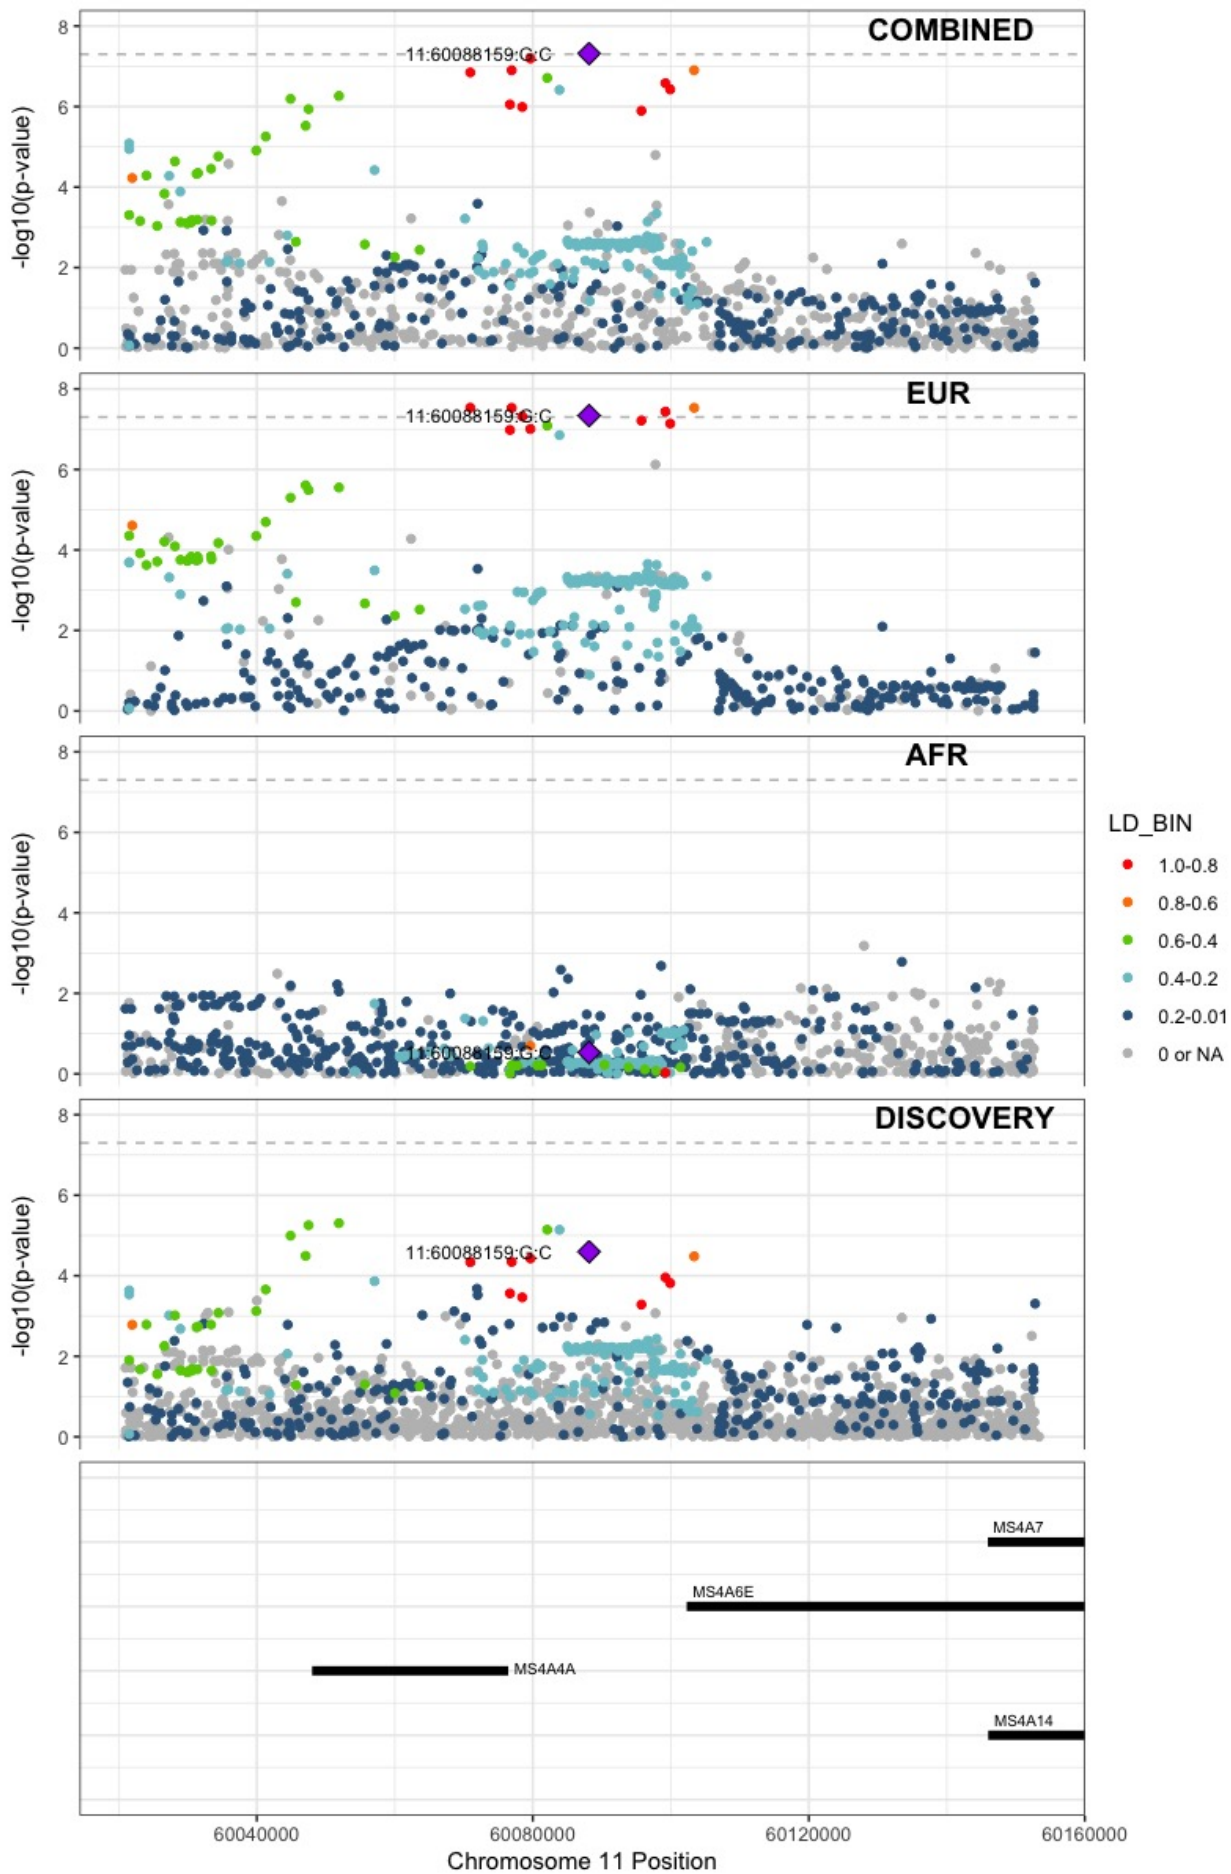

Supplementary Figure 6.64 – rs174551 (chr11:61573684) in locus 82 (FADS1)

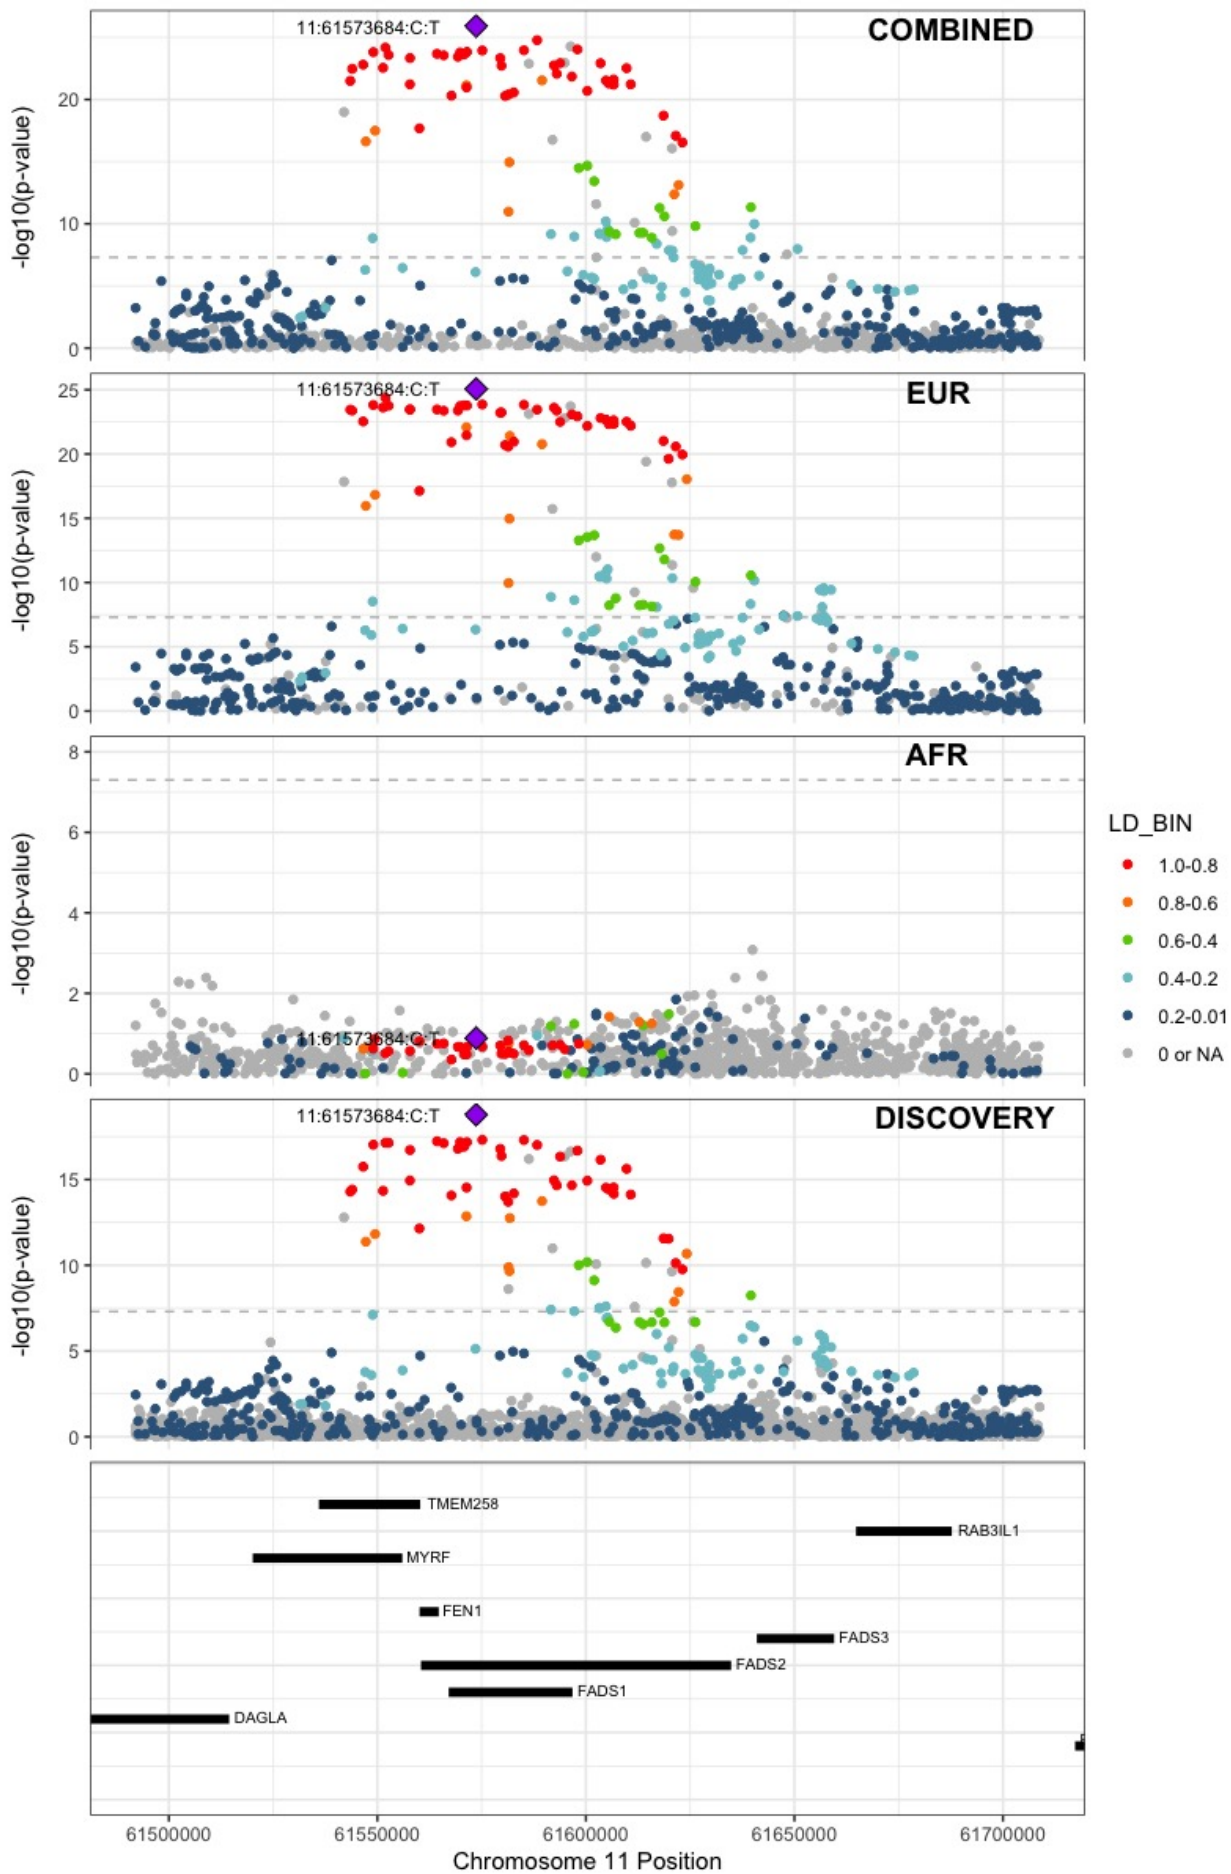

Supplementary Figure 6.65 – rs2846027 (chr11:114003415) in locus 84 (ZBTB16)

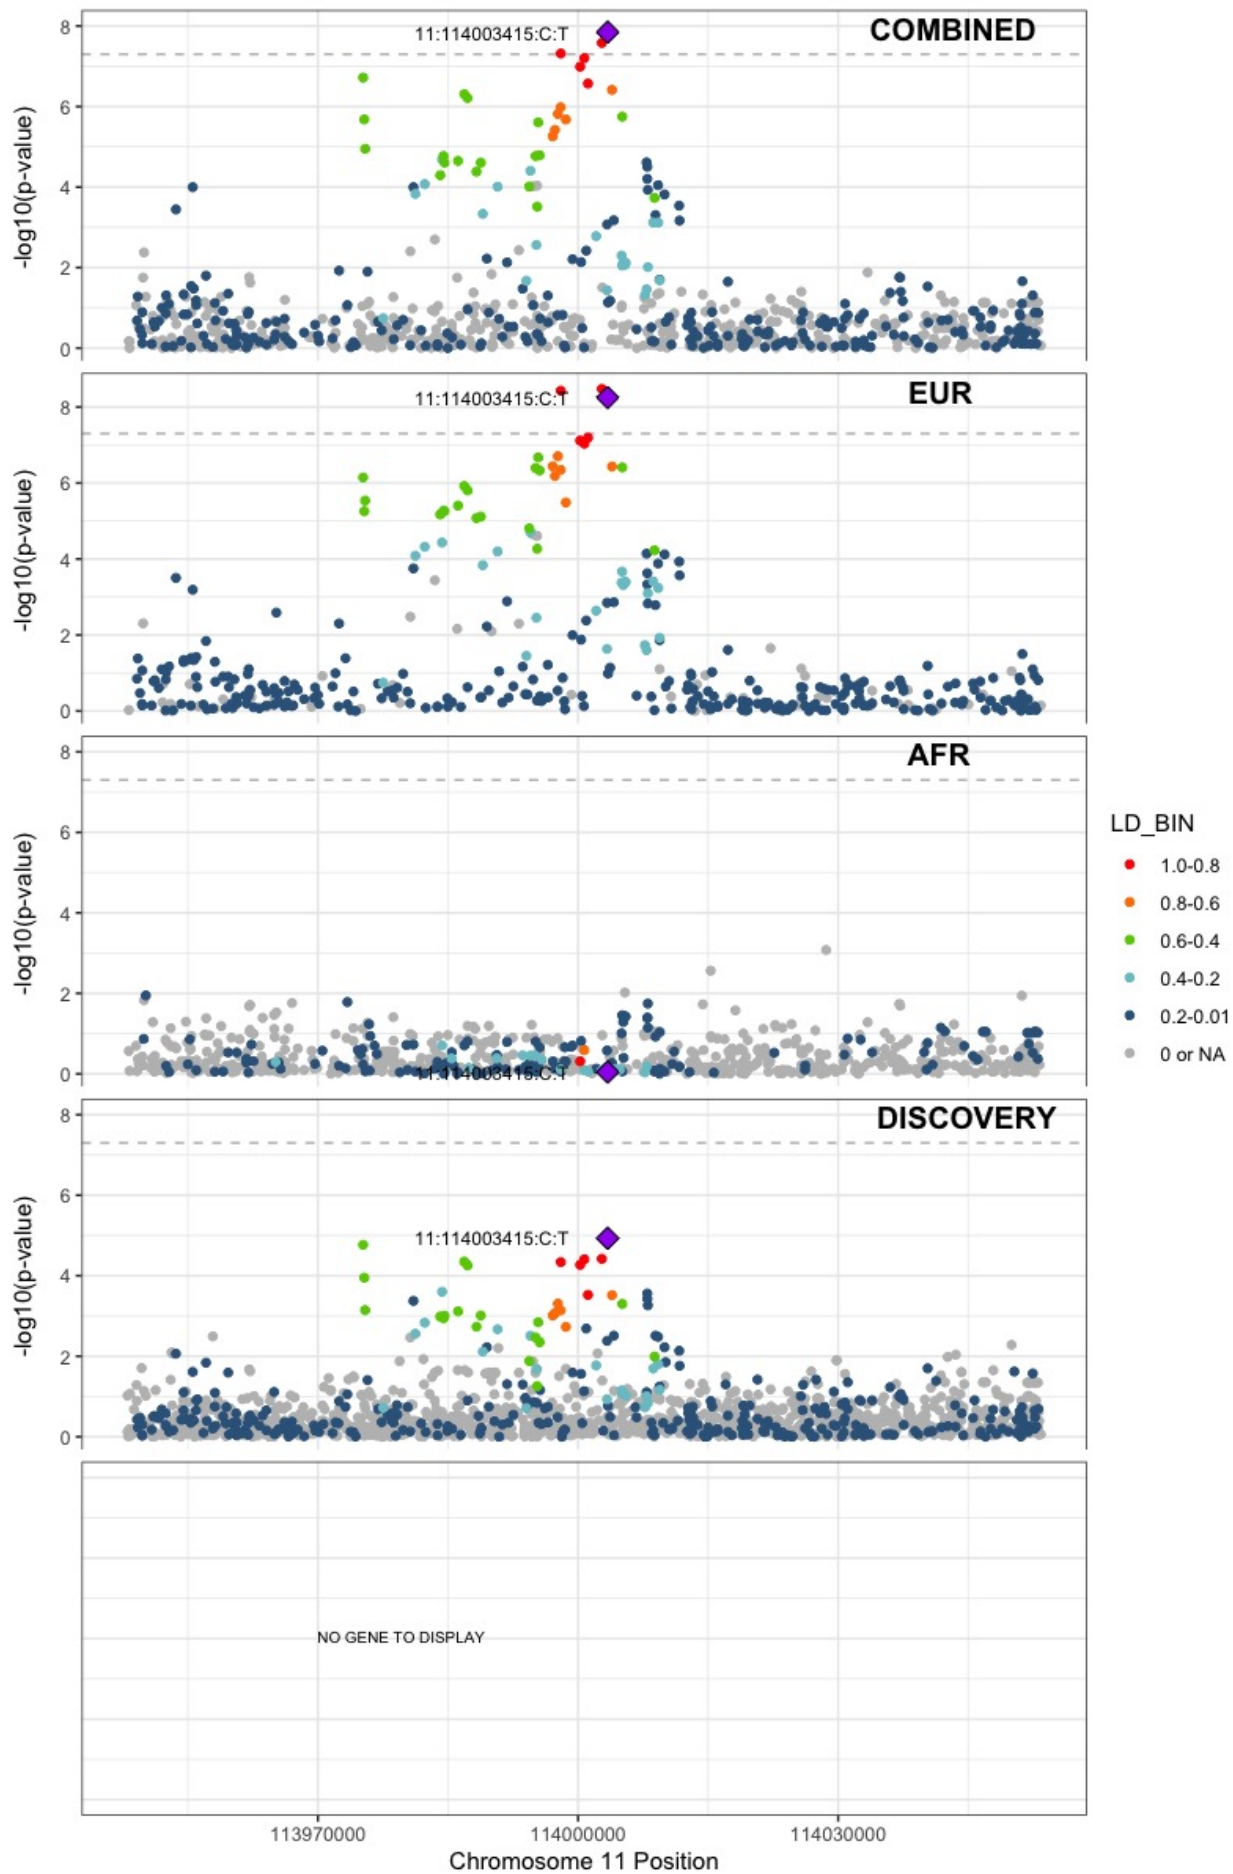

Supplementary Figure 6.66 – rs35257264 (chr11:126296816) in locus 85 (ST3GAL4)

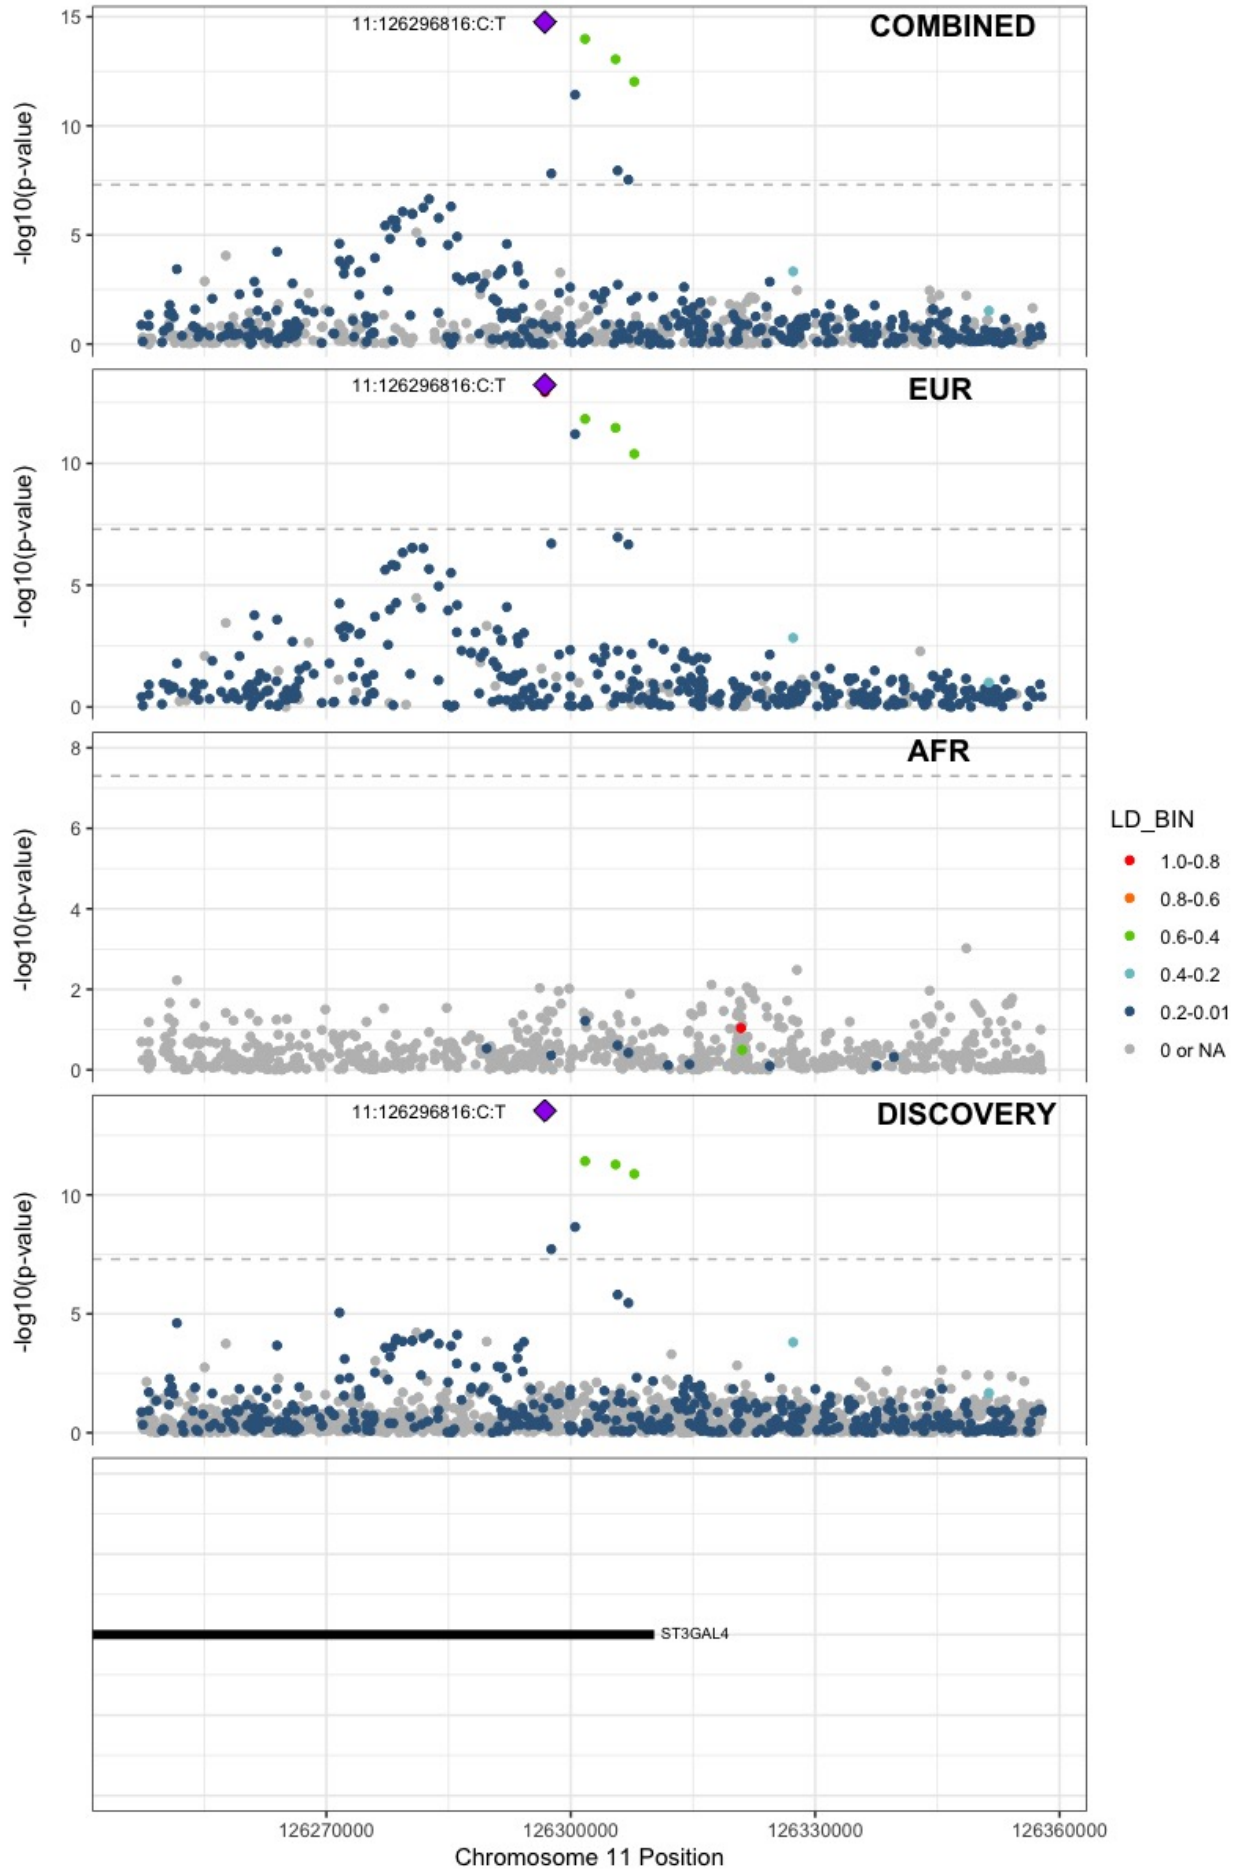

Supplementary Figure 6.67 – rs7107568 (chr11:130779668) in locus 86 (SNX19)

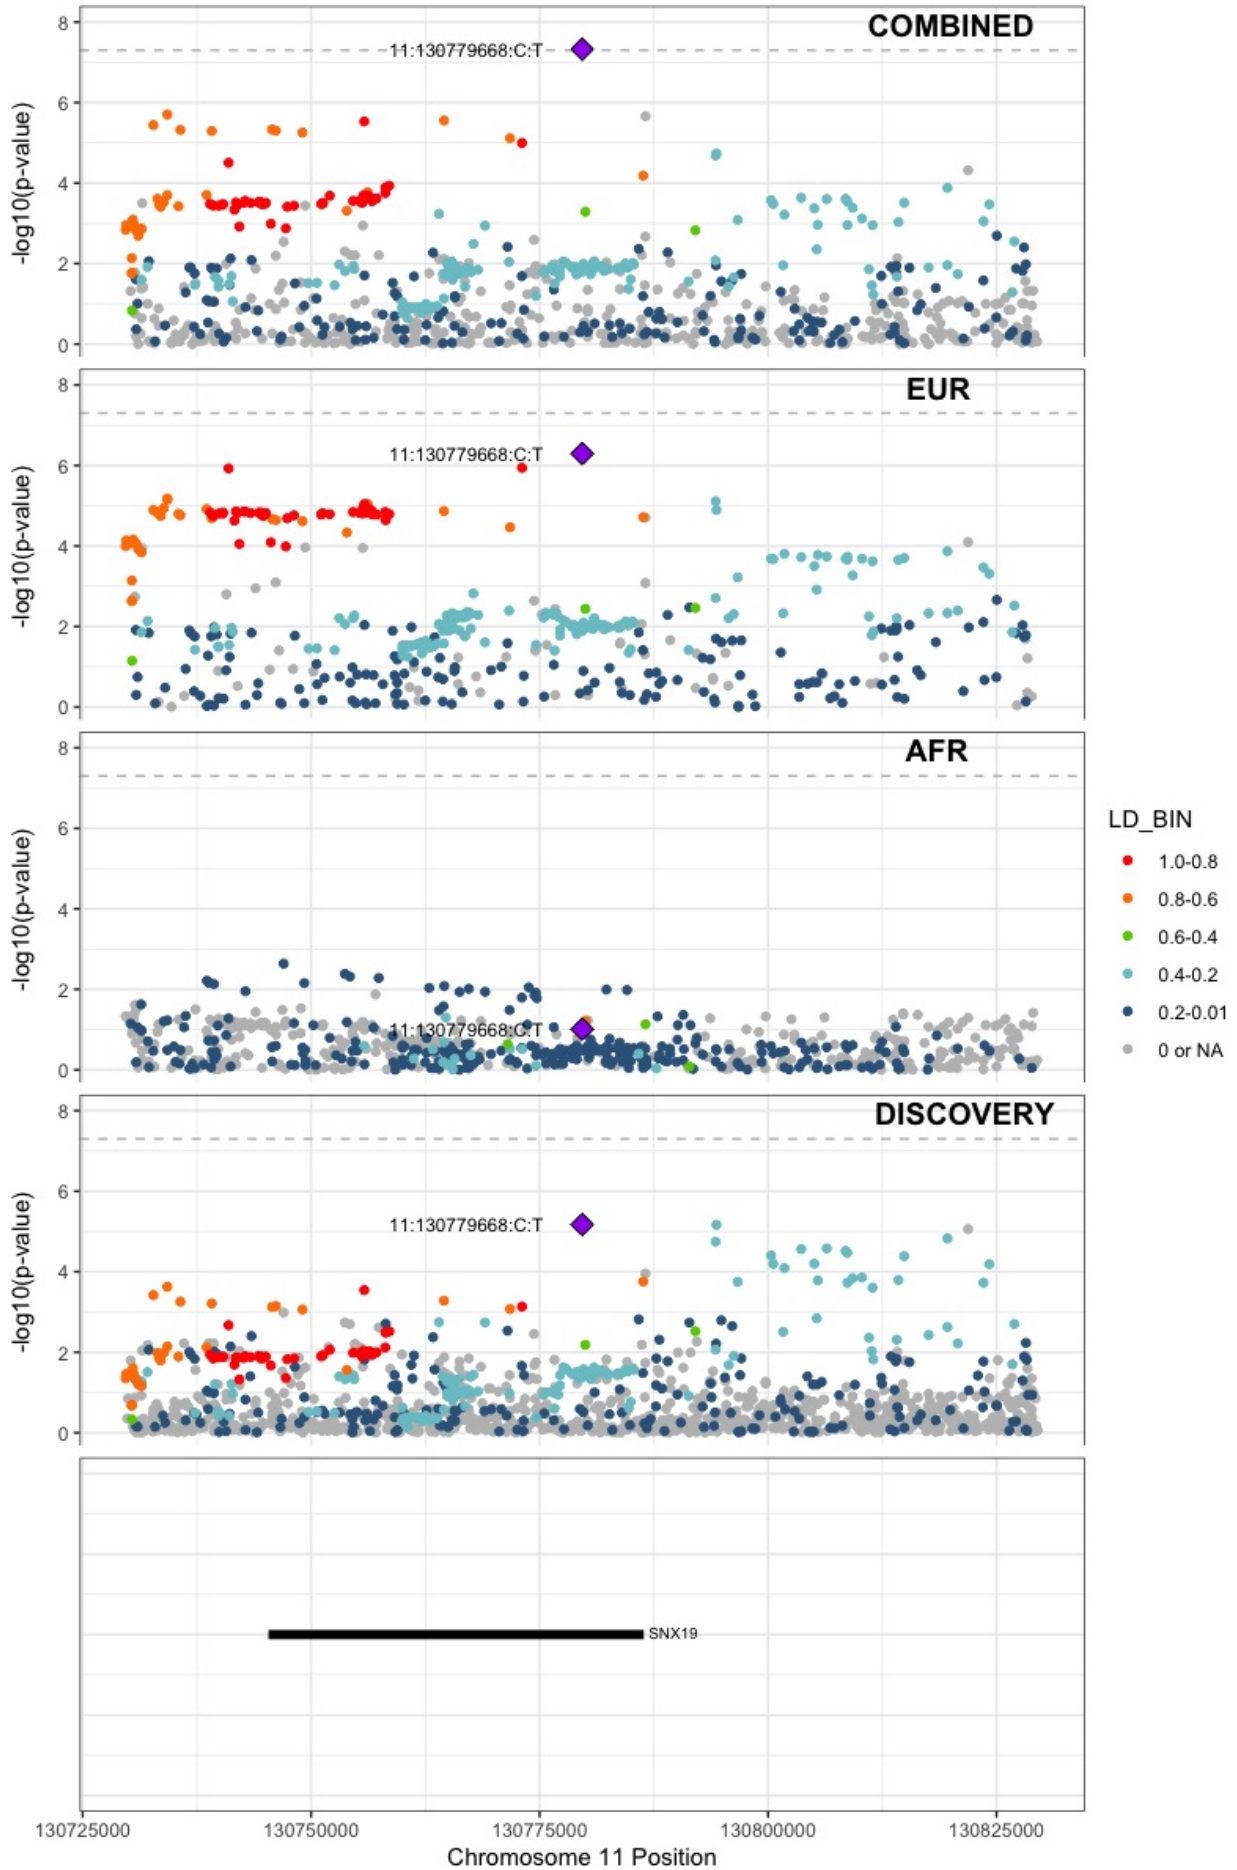

Supplementary Figure 6.68 – rs1558519 (chr12:6153738) in locus 87 (VWF)

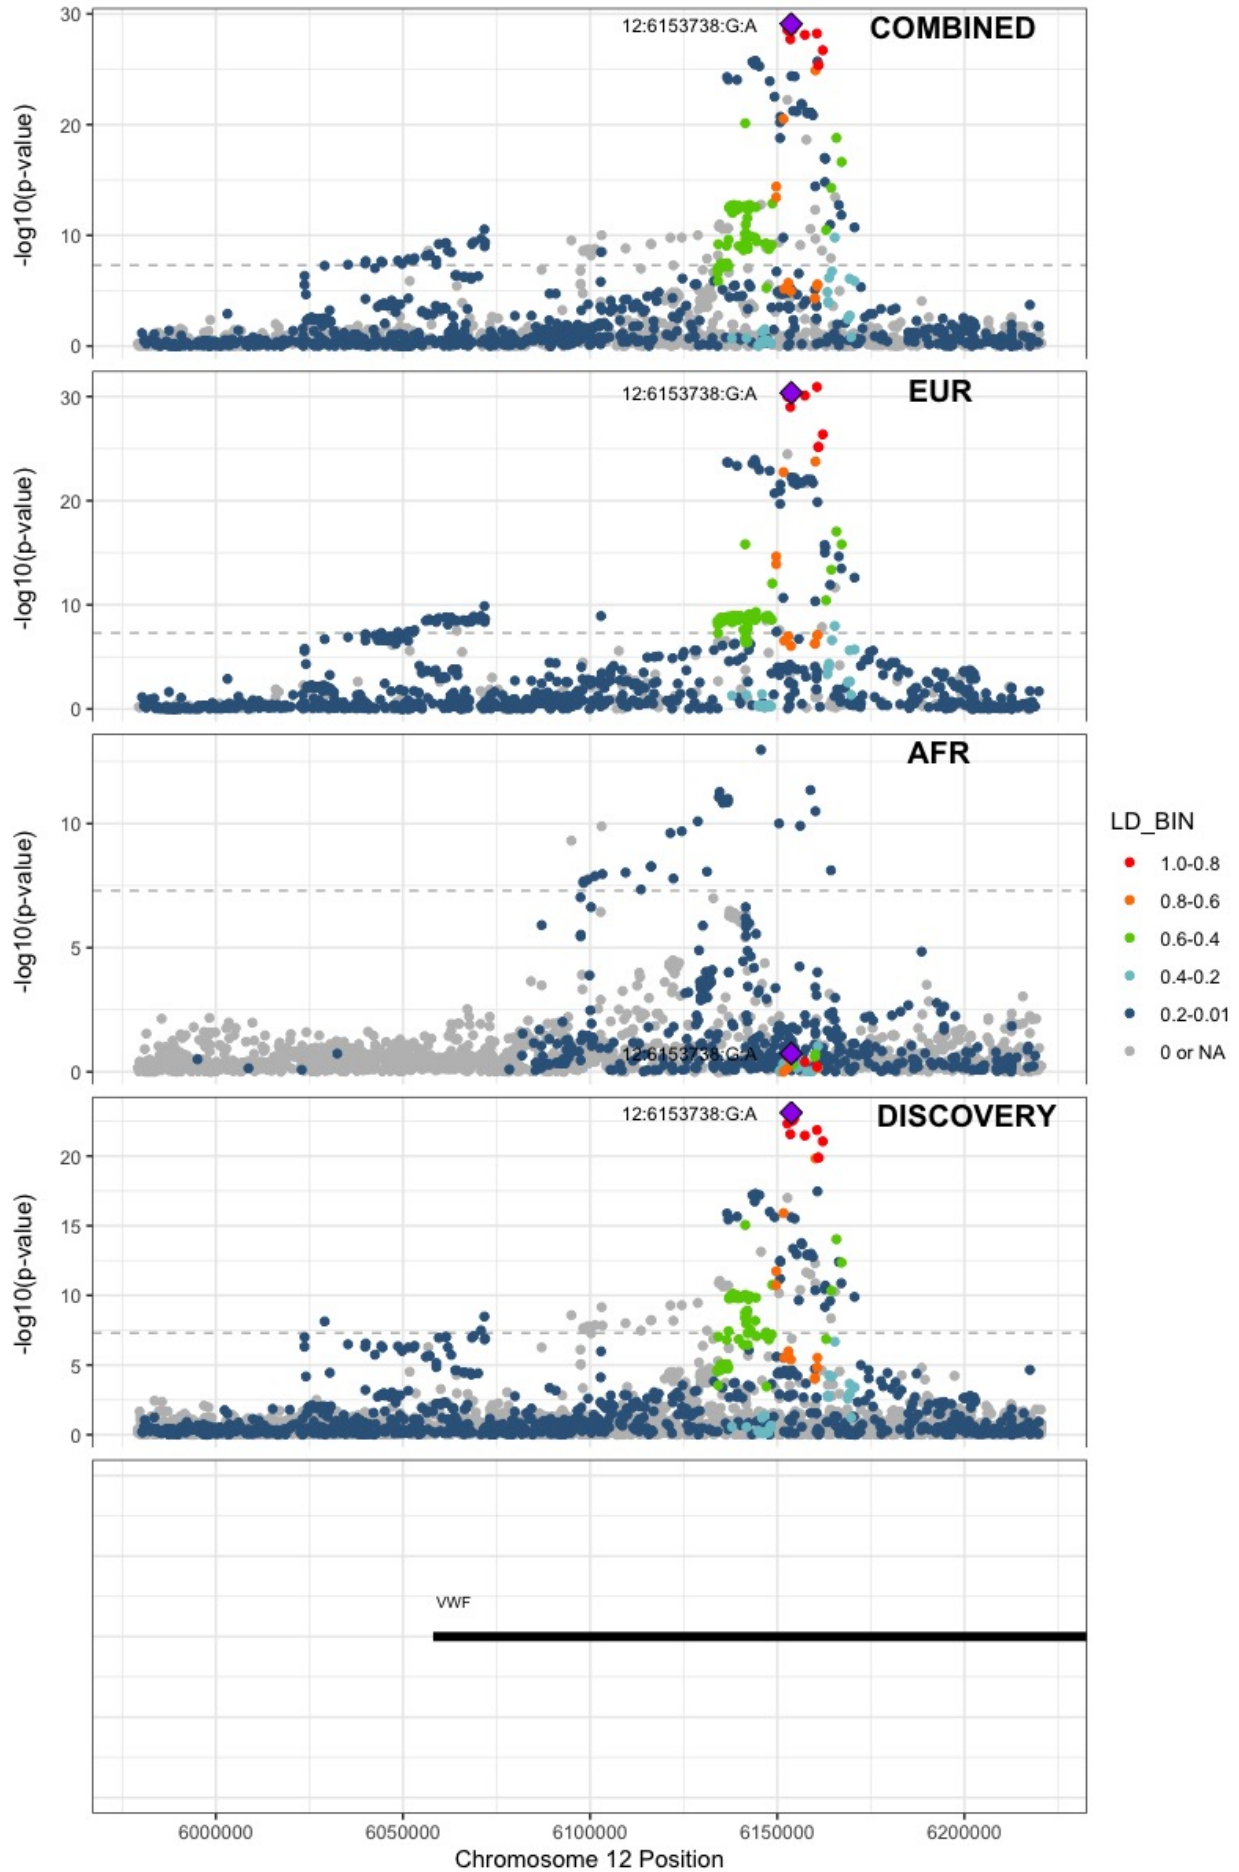

Supplementary Figure 6.69 – rs7311483 (chr12:9053661) in locus 88 (A2ML1 ;PHC1)

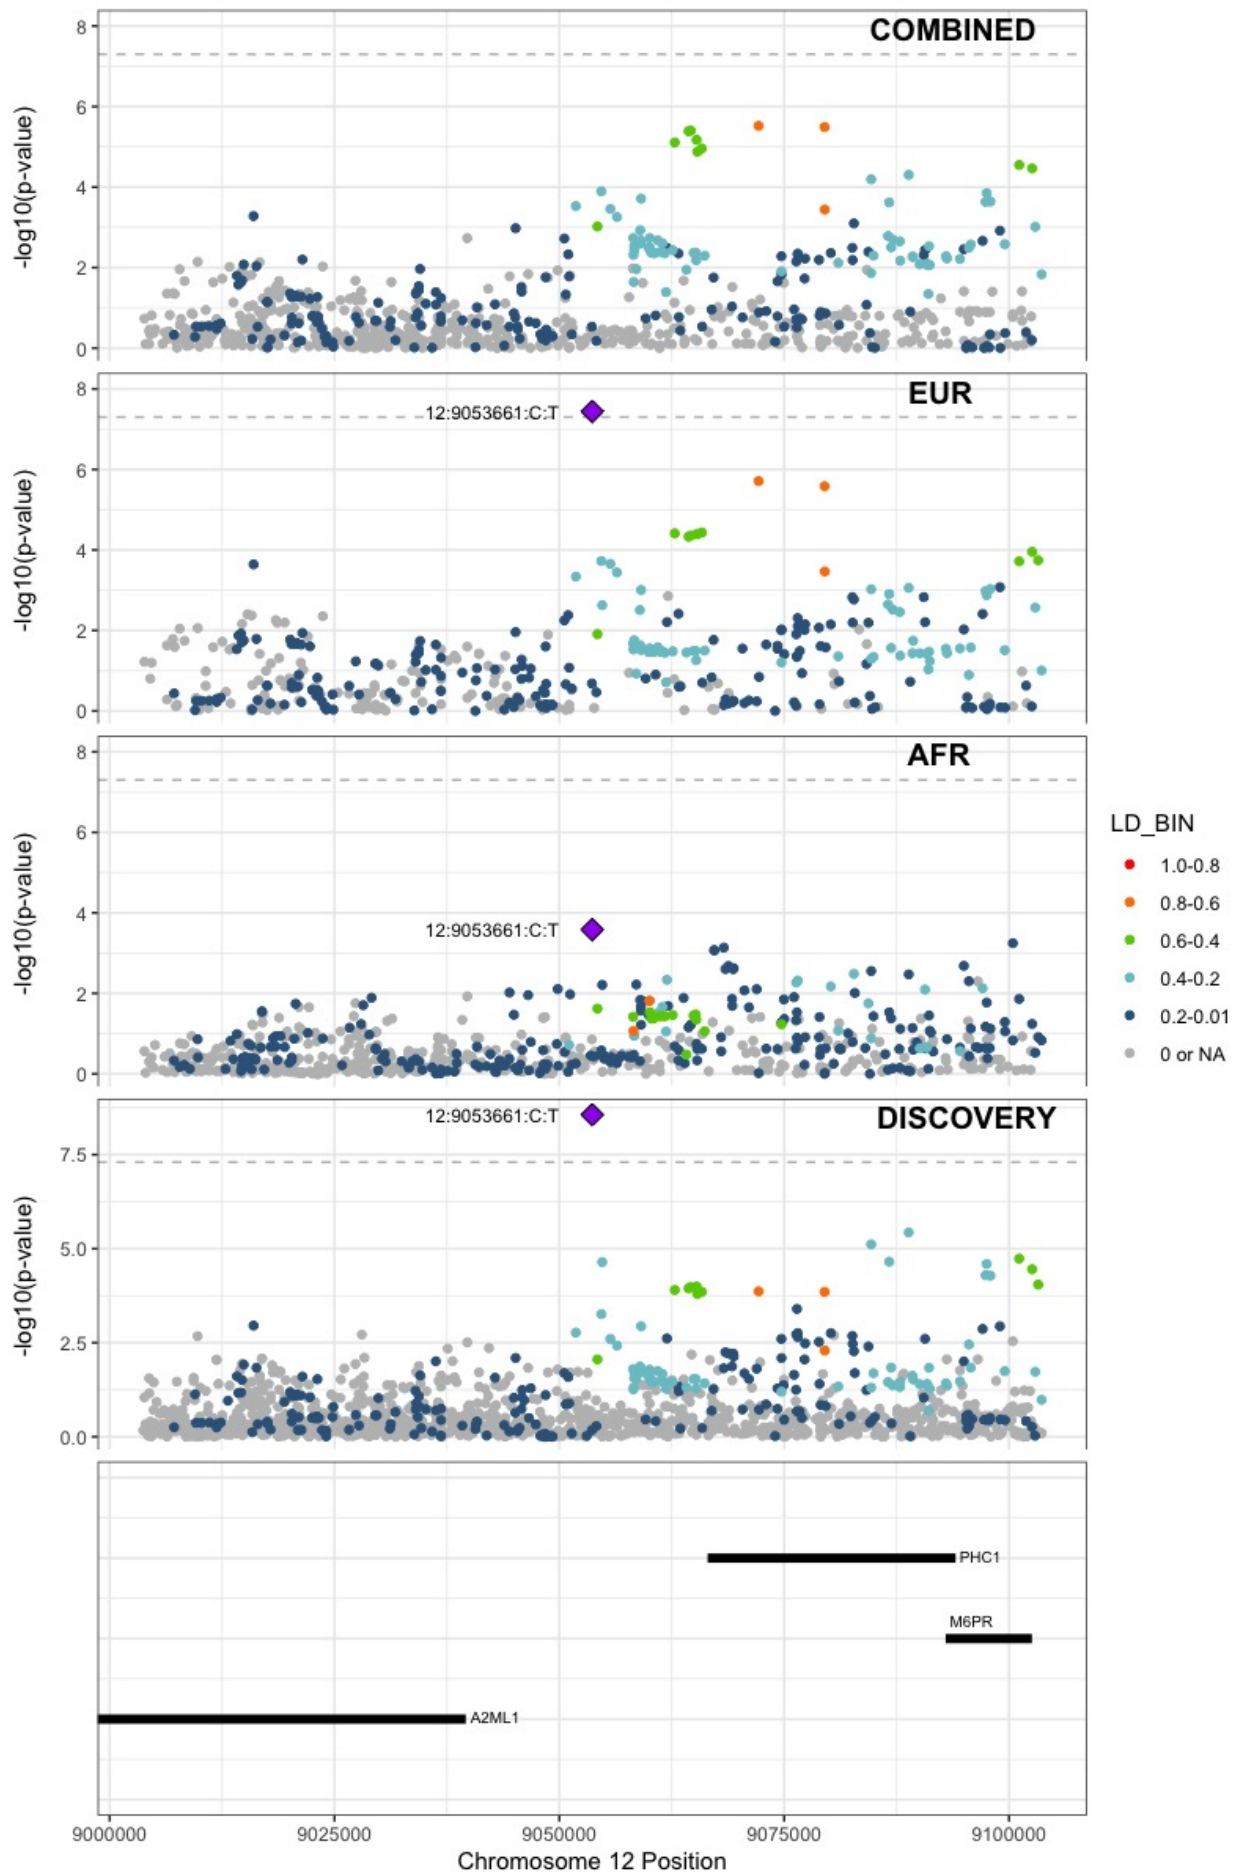



Supplementary Figure 6.70 – rs6580981 (chr12:54723028) in locus 89 (COPZ1)

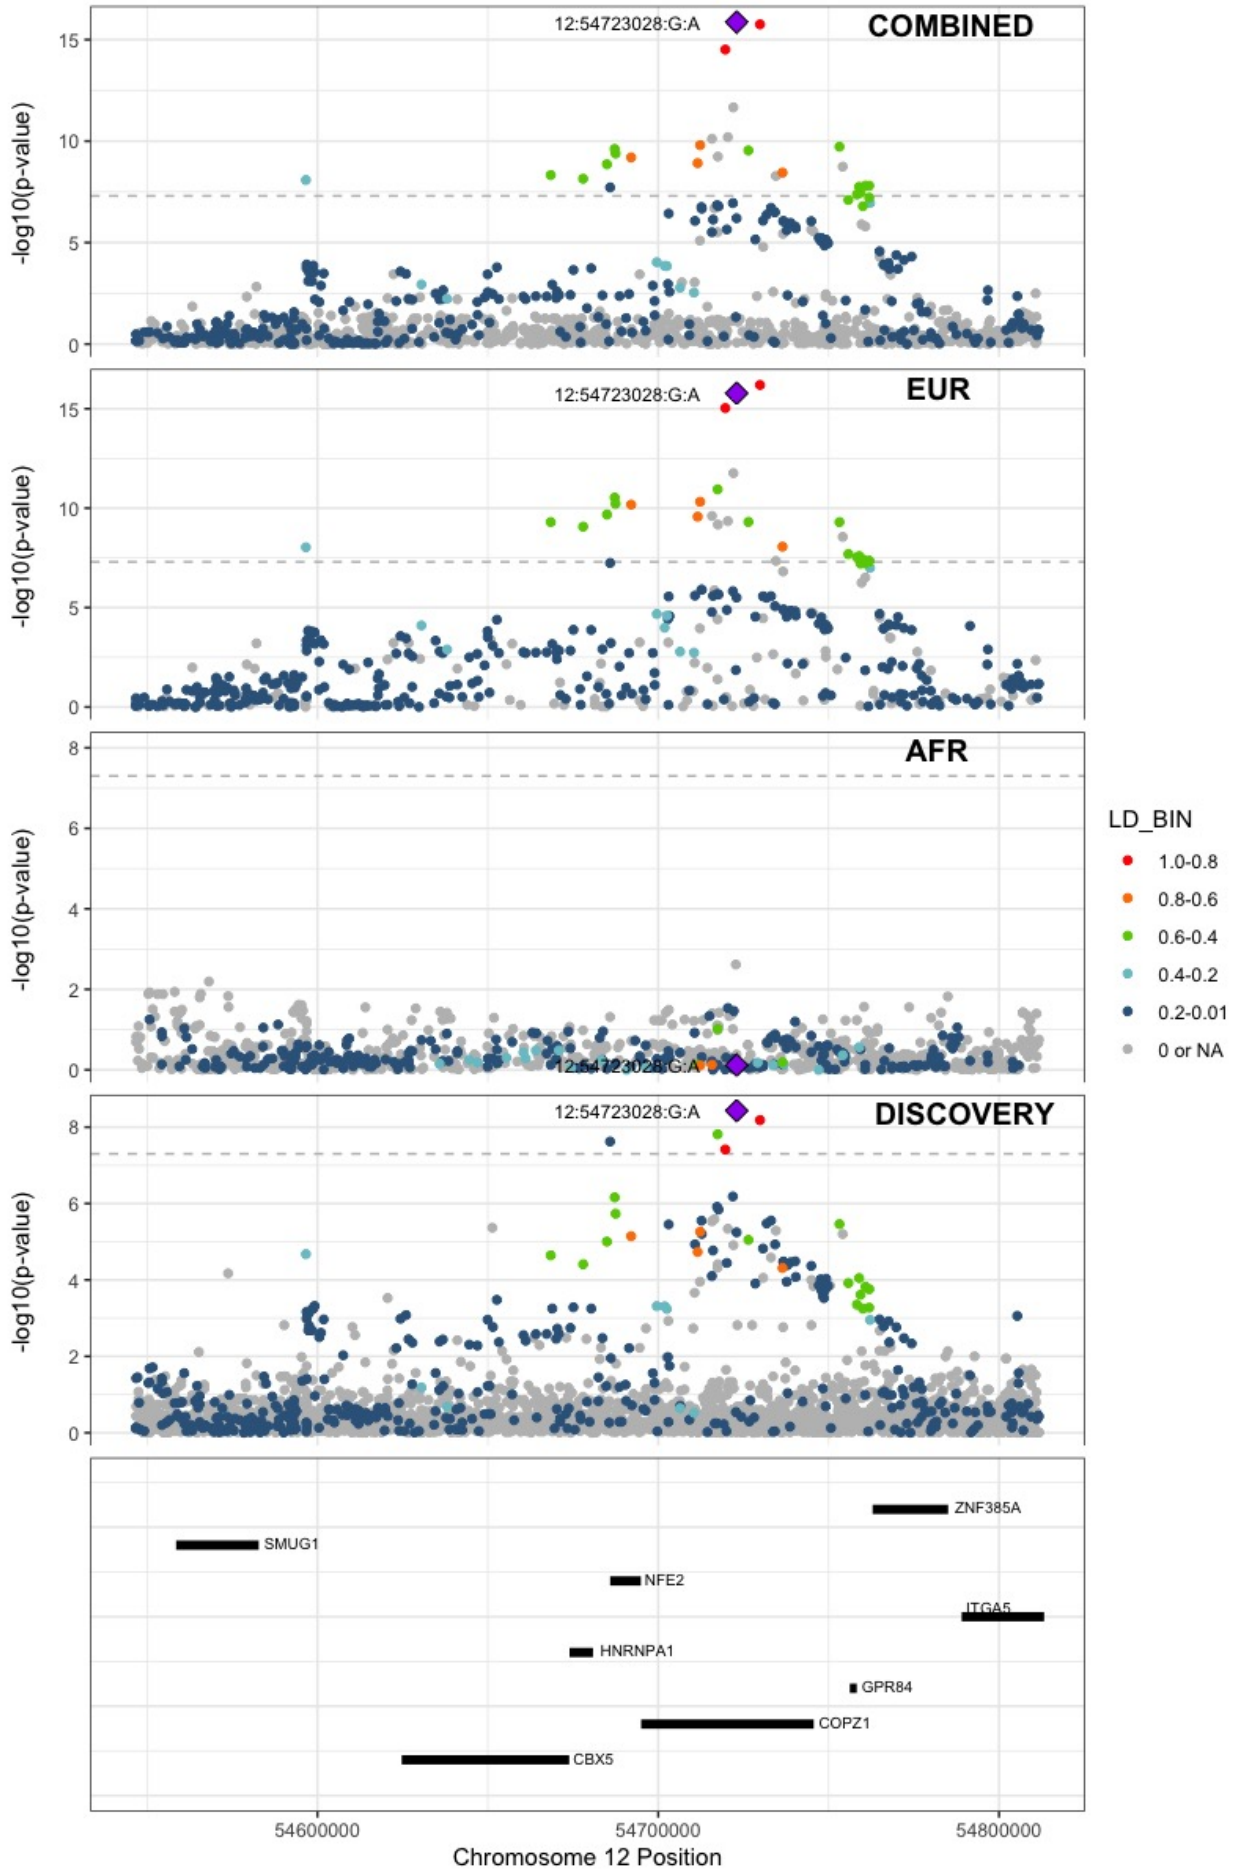

Supplementary Figure 6.71 – rs142351376 (chr12:104136288) in locus 90 (STAB2)

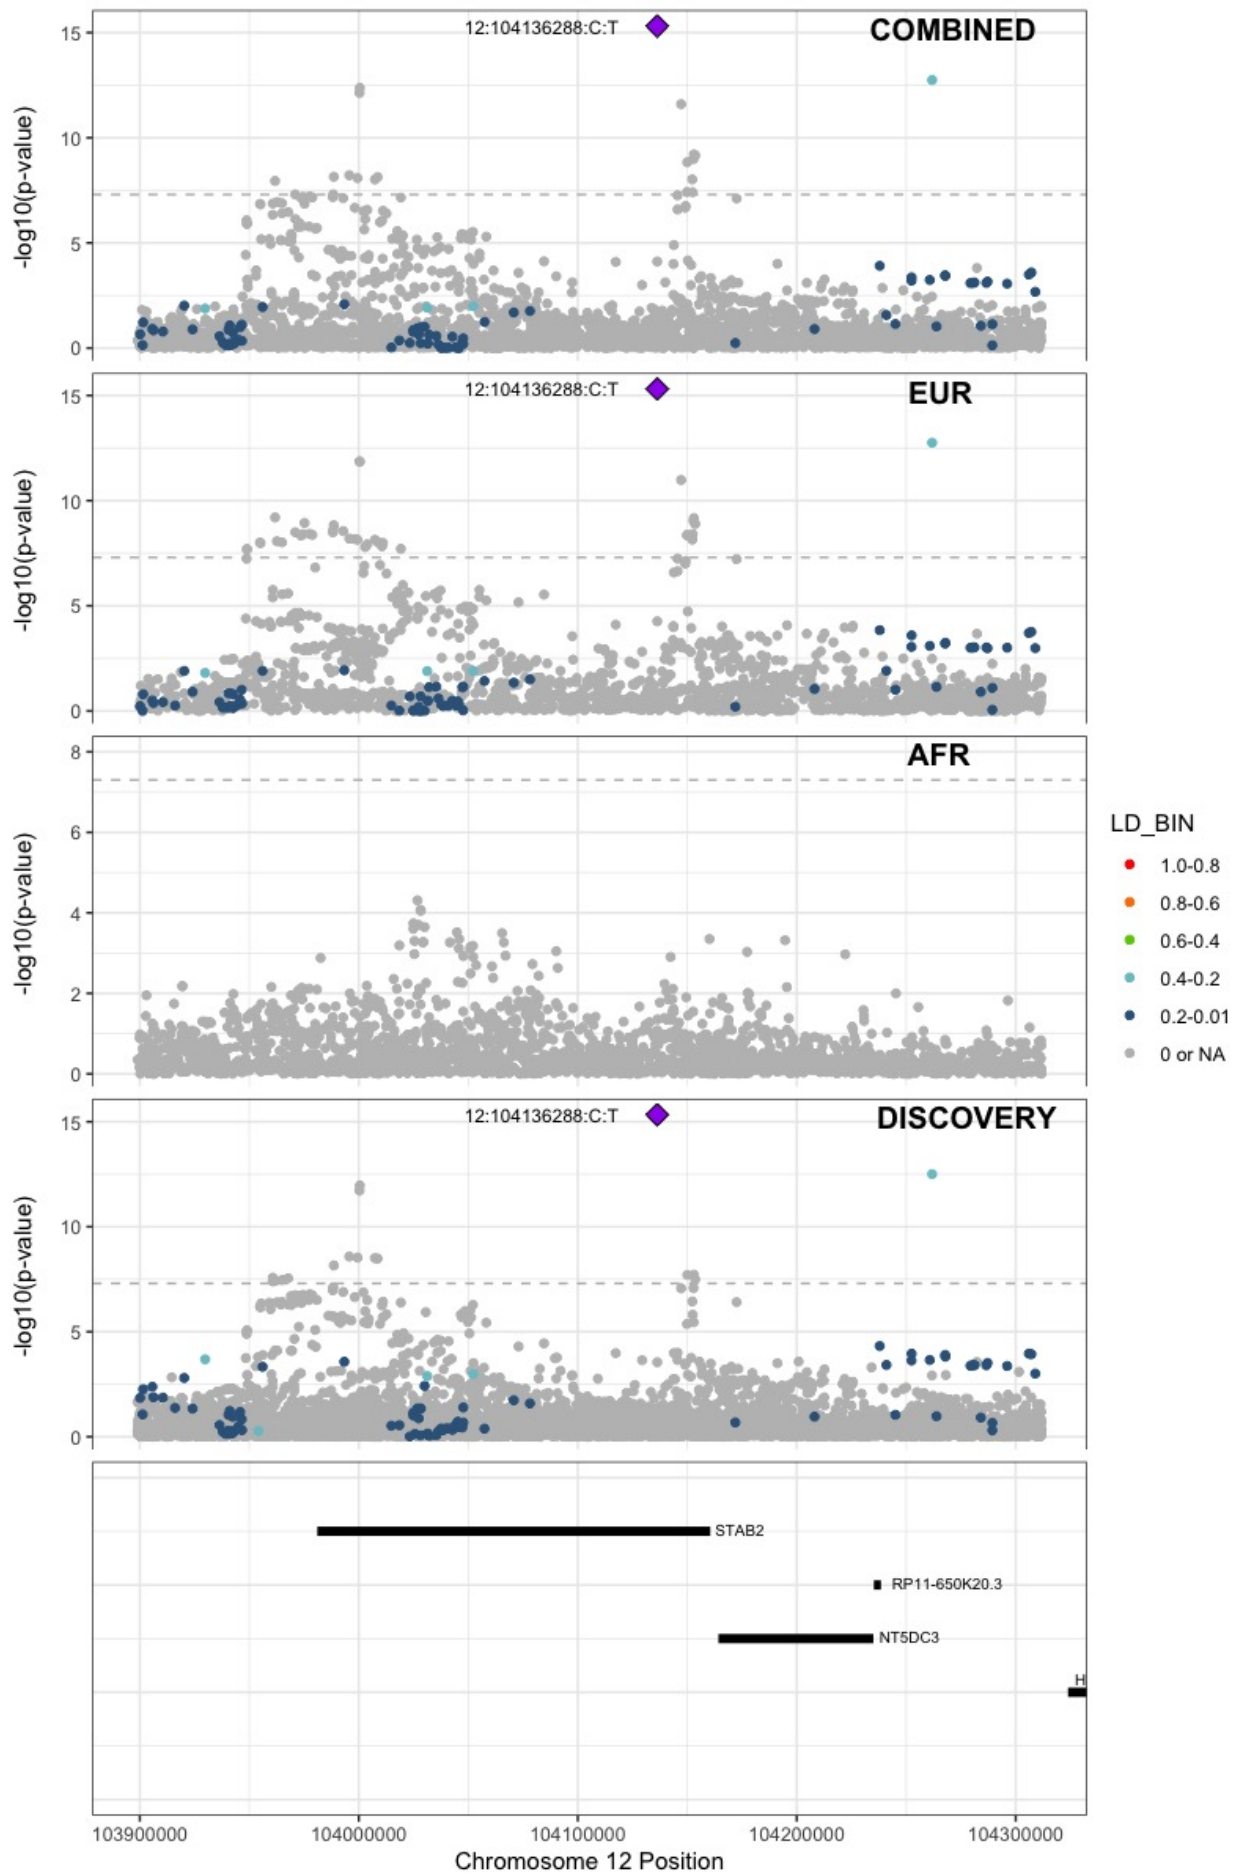

Supplementary Figure 6.72 – rs3184504 (chr12:111884608) in locus 91 (SH2B3)

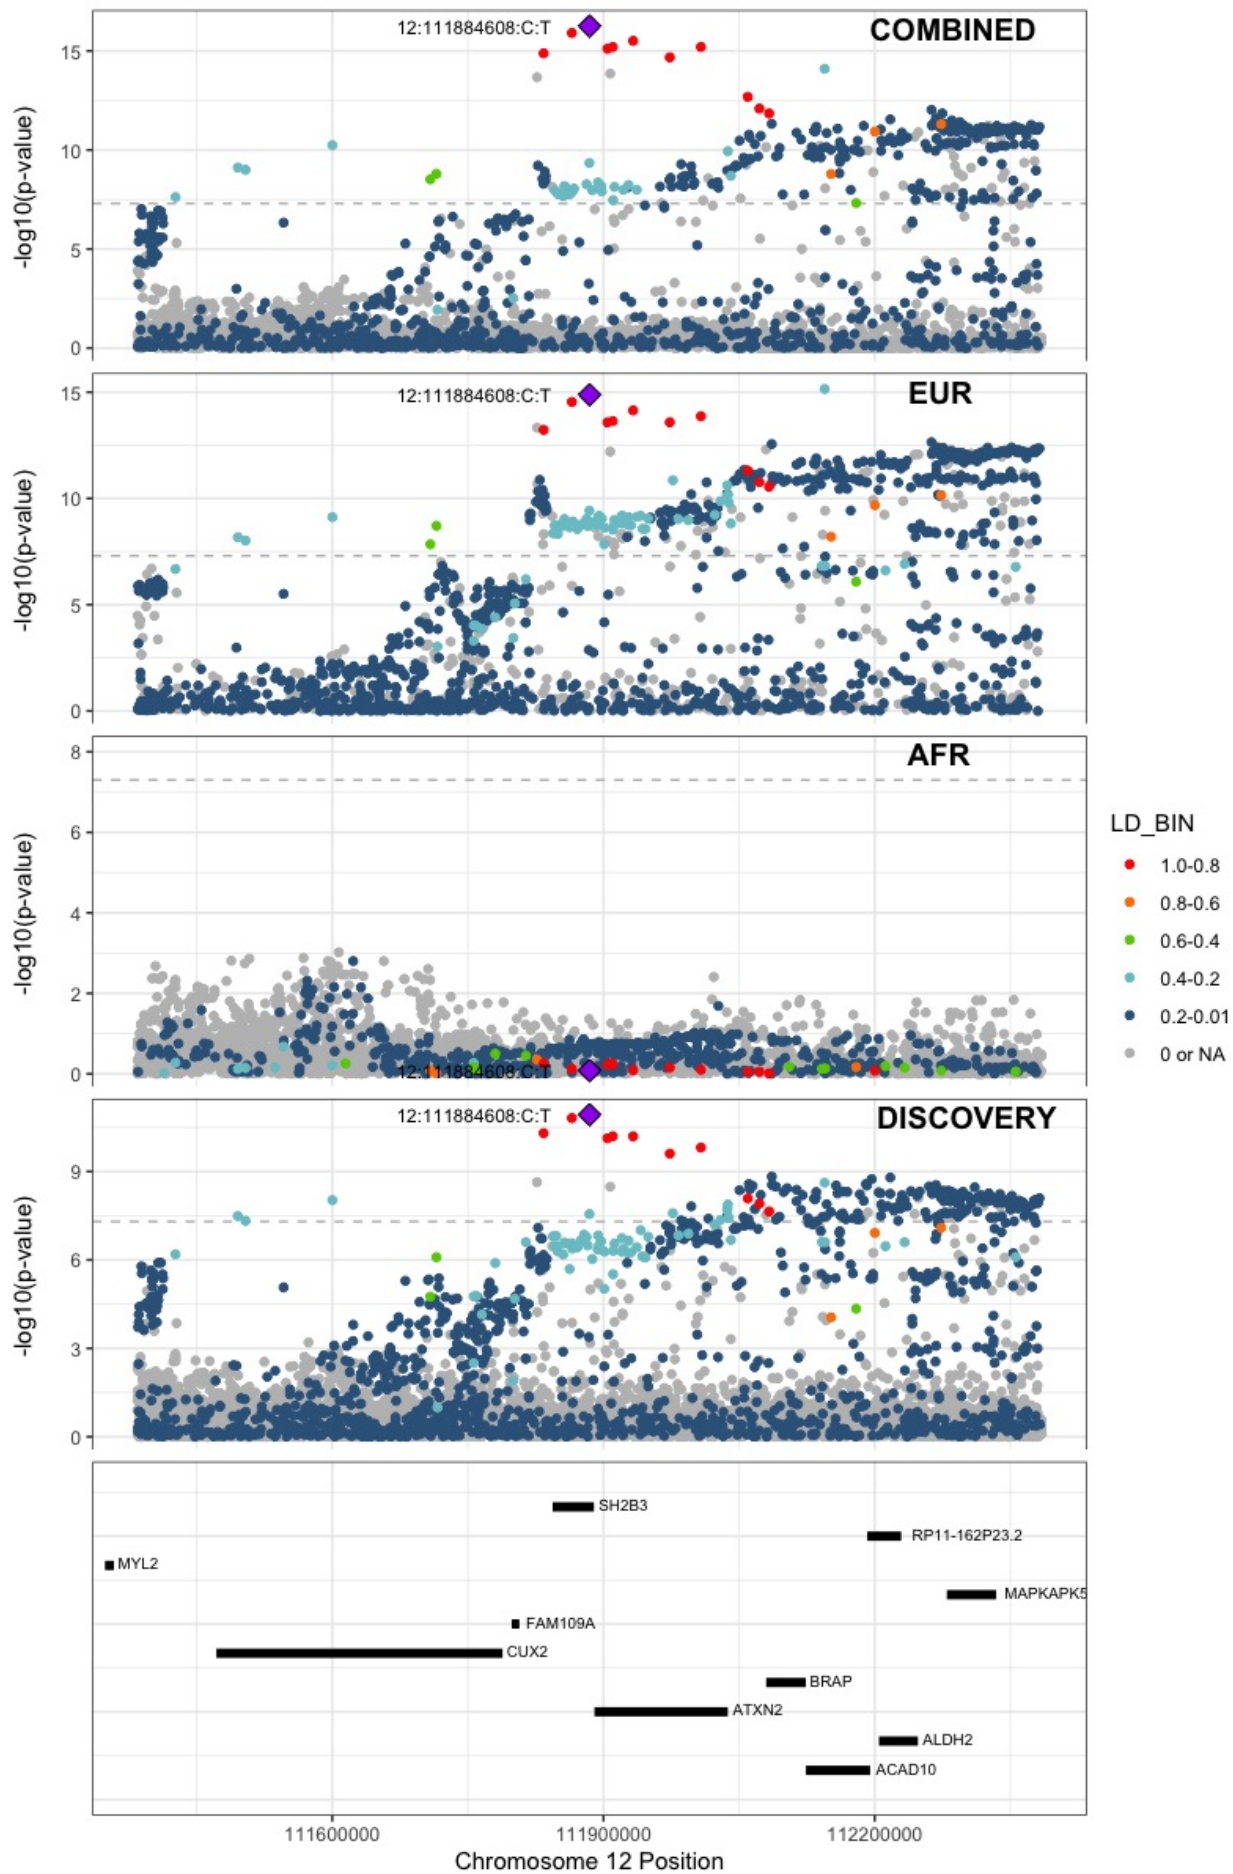

Supplementary Figure 6.73 – rs2851435 (chr12:123712416) in locus 92 (MPHOSPH9)

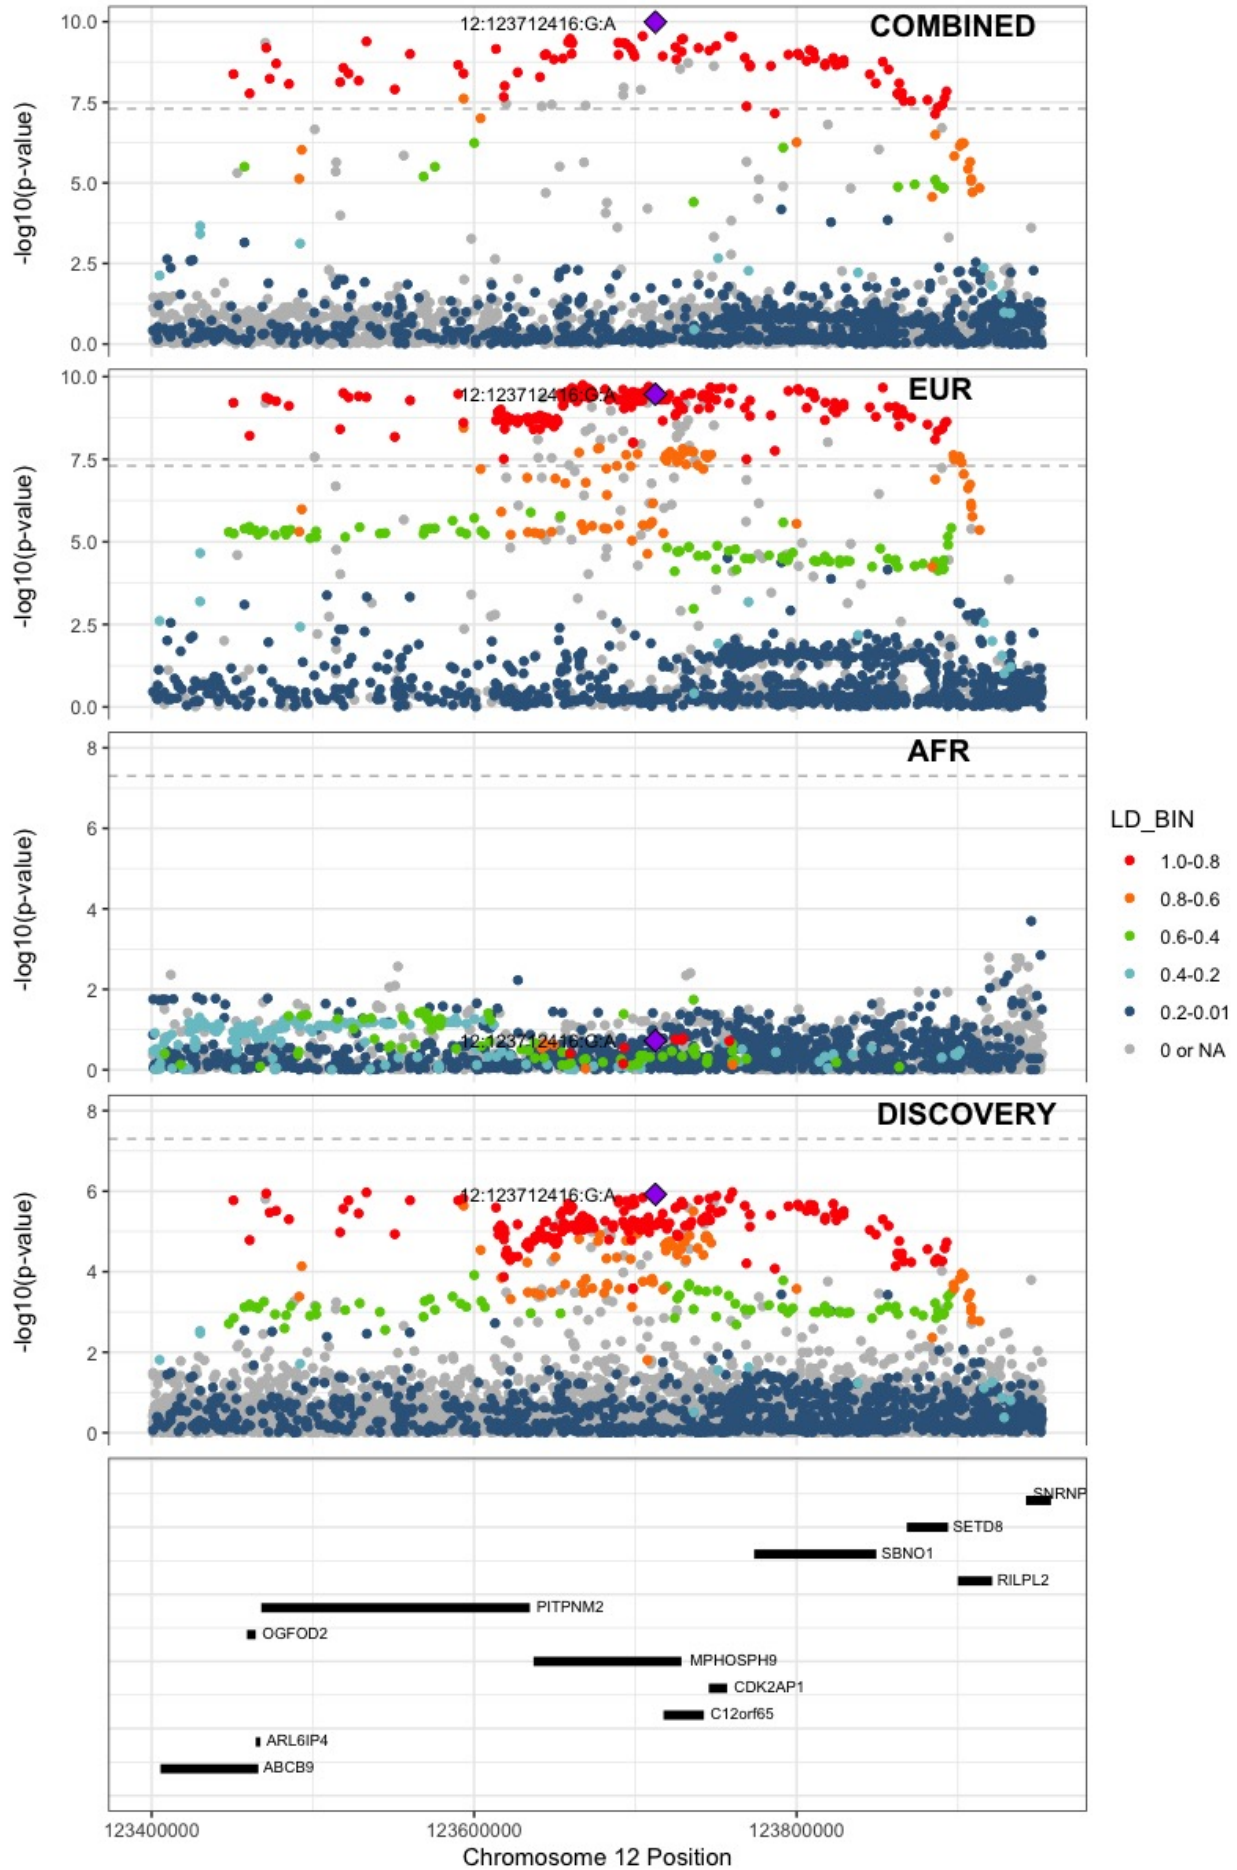

Supplementary Figure 6.74 – rs3211752 (chr13:113787459) in locus 94 (F10)

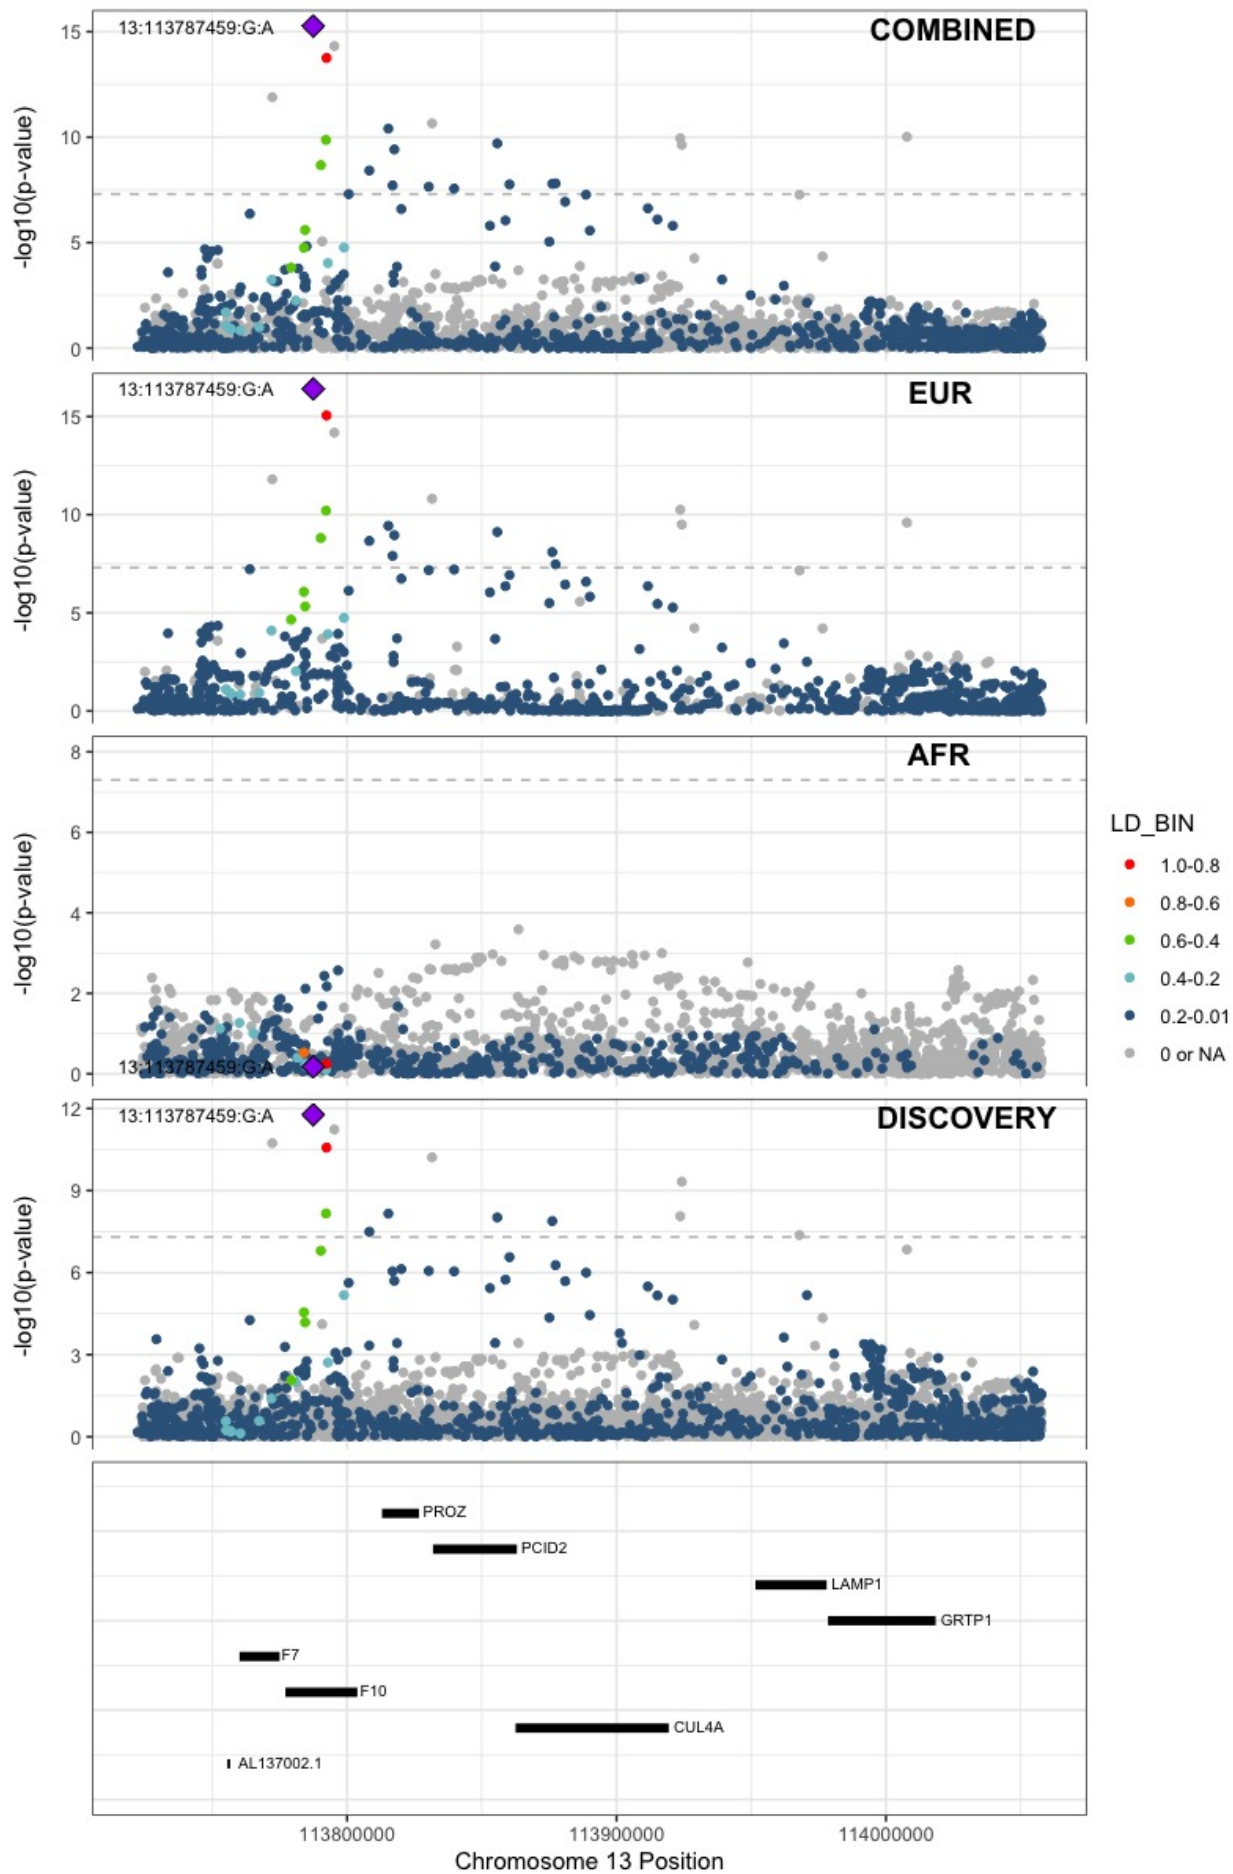

Supplementary Figure 6.75 – rs11158204 (chr14:58844526) in locus 95 (ARID4A ;TOMM20L)

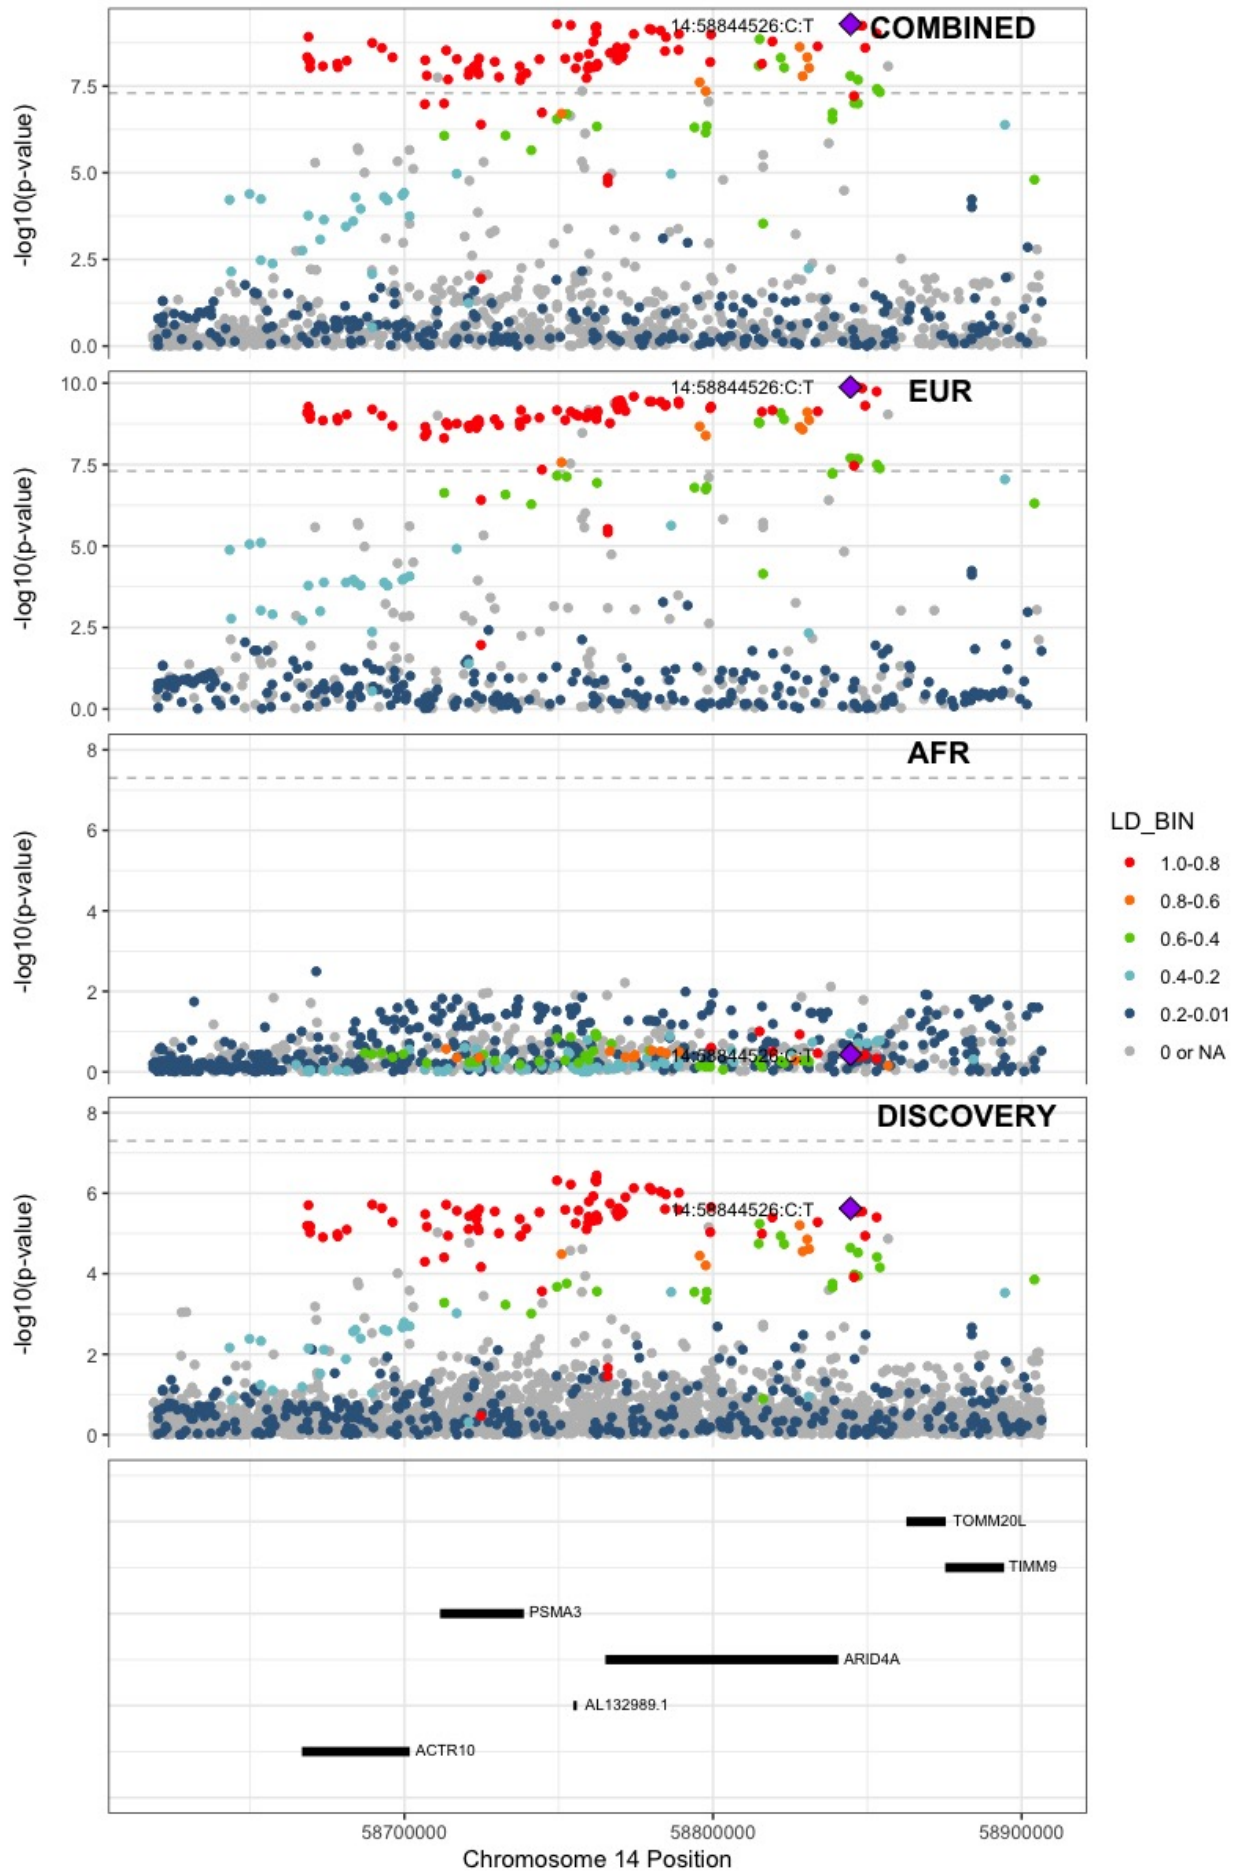

Supplementary Figure 6.76 – rs2127869 (chr14:65794352) in locus 96 (LINC02324;MIR4708)

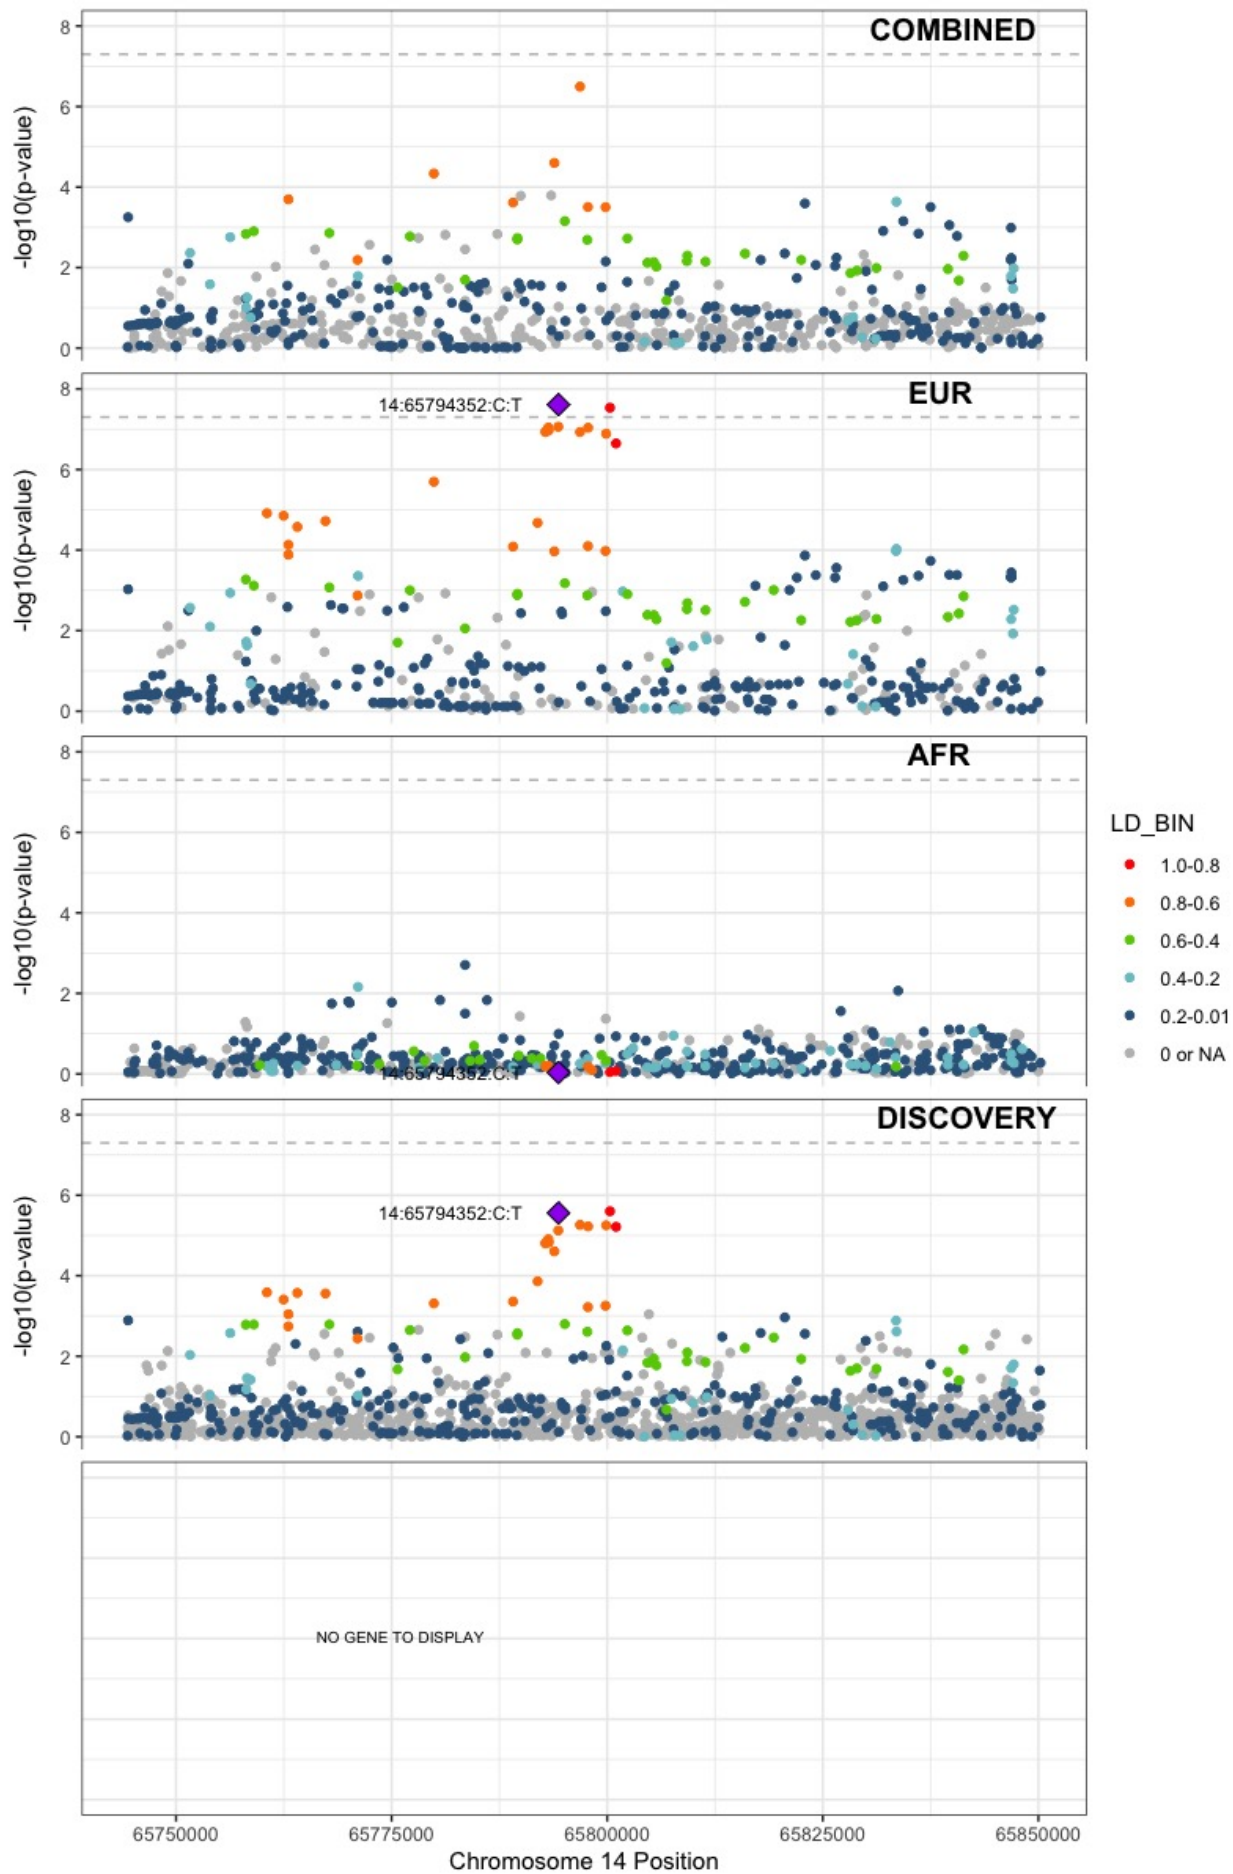

Supplementary Figure 6.77 – rs7152641 (chr14:92213967) in locus 97 (CATSPERB;TC2N)

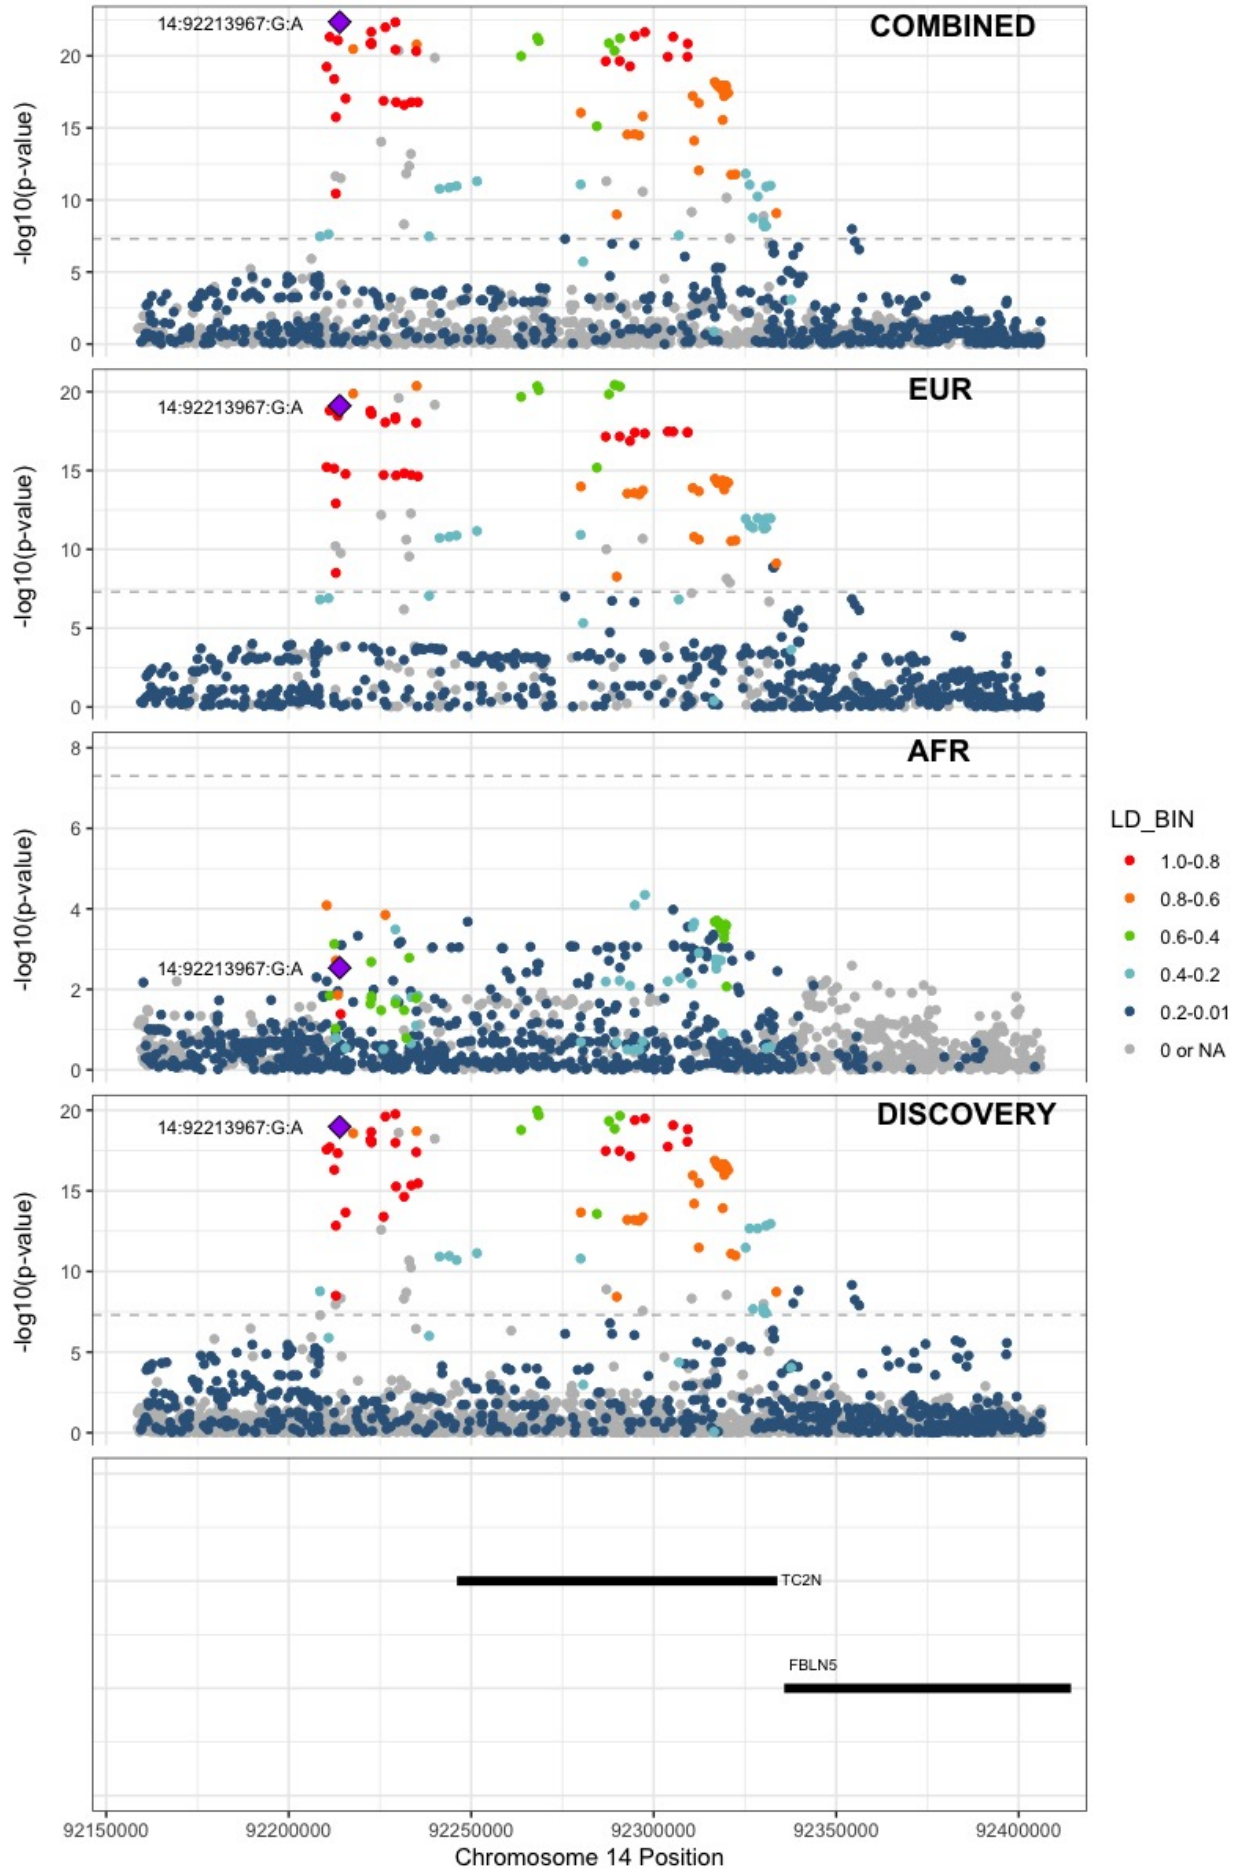



Supplementary Figure 6.78 – rs28929474 (chr14:94844947) in locus 98 (SERPINA1)

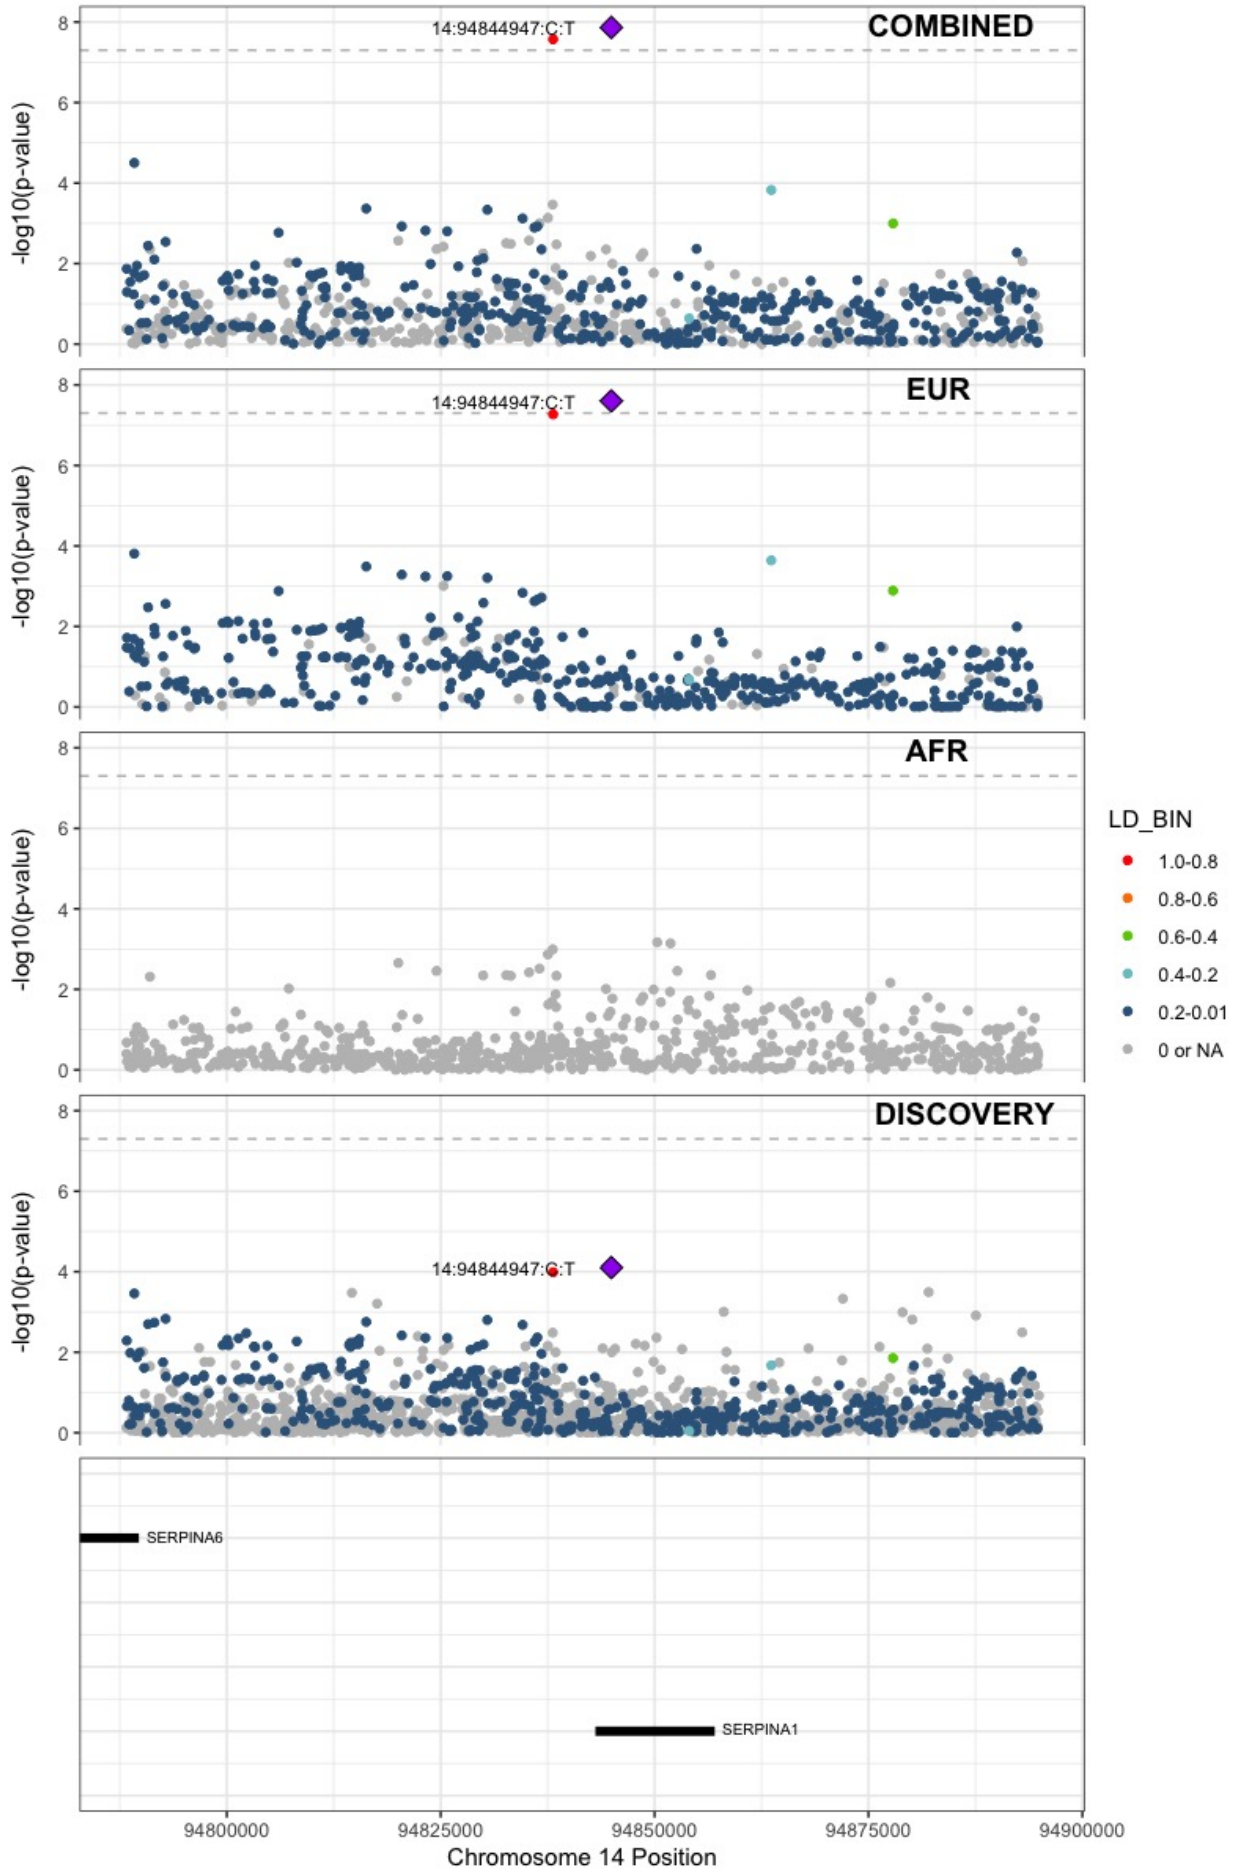

Supplementary Figure 6.79 – rs28519971 (chr14:103089808) in locus 99 (RCOR1)

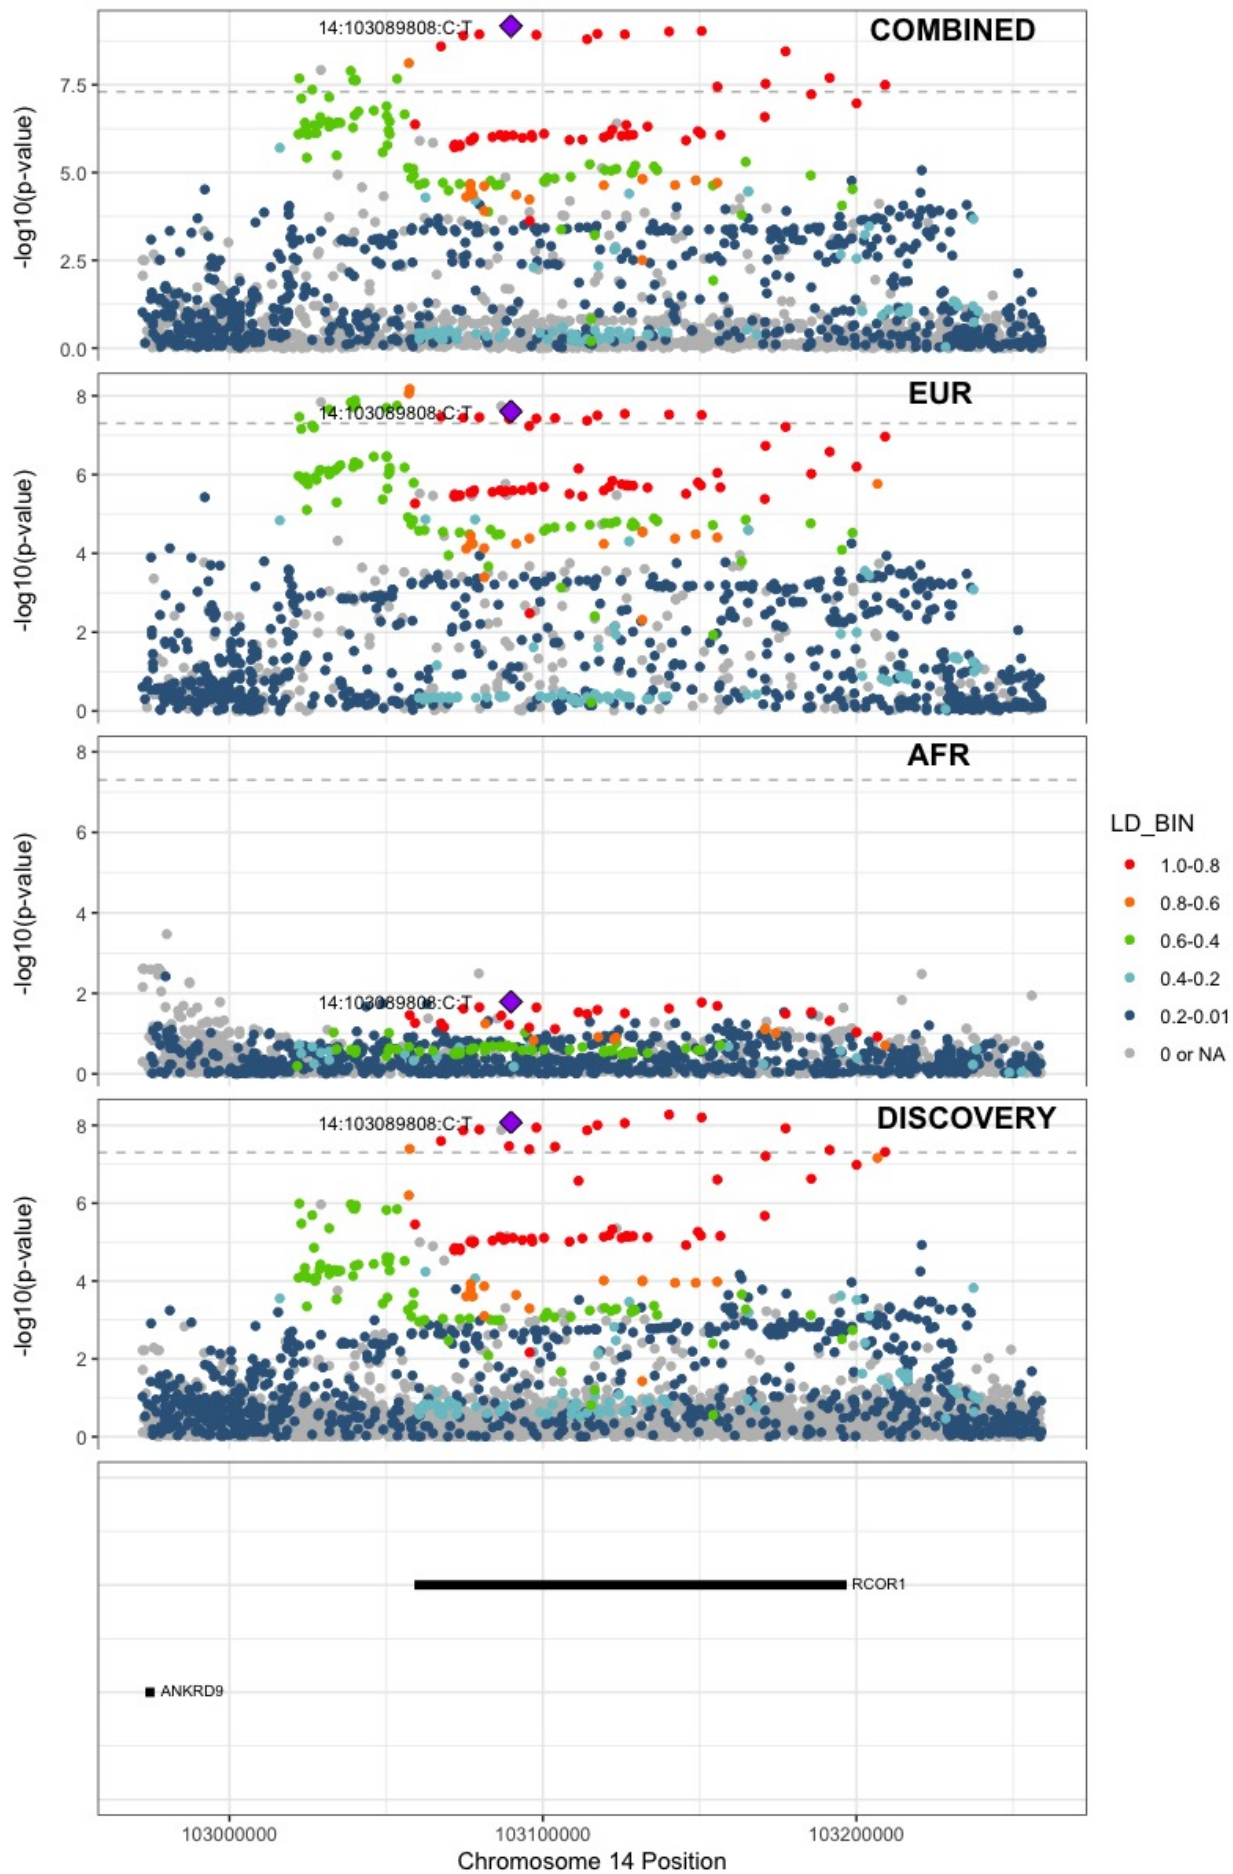

Supplementary Figure 6.80 – rs1247656151 (chr15:43677975) in locus 100 (TUBGCP4)

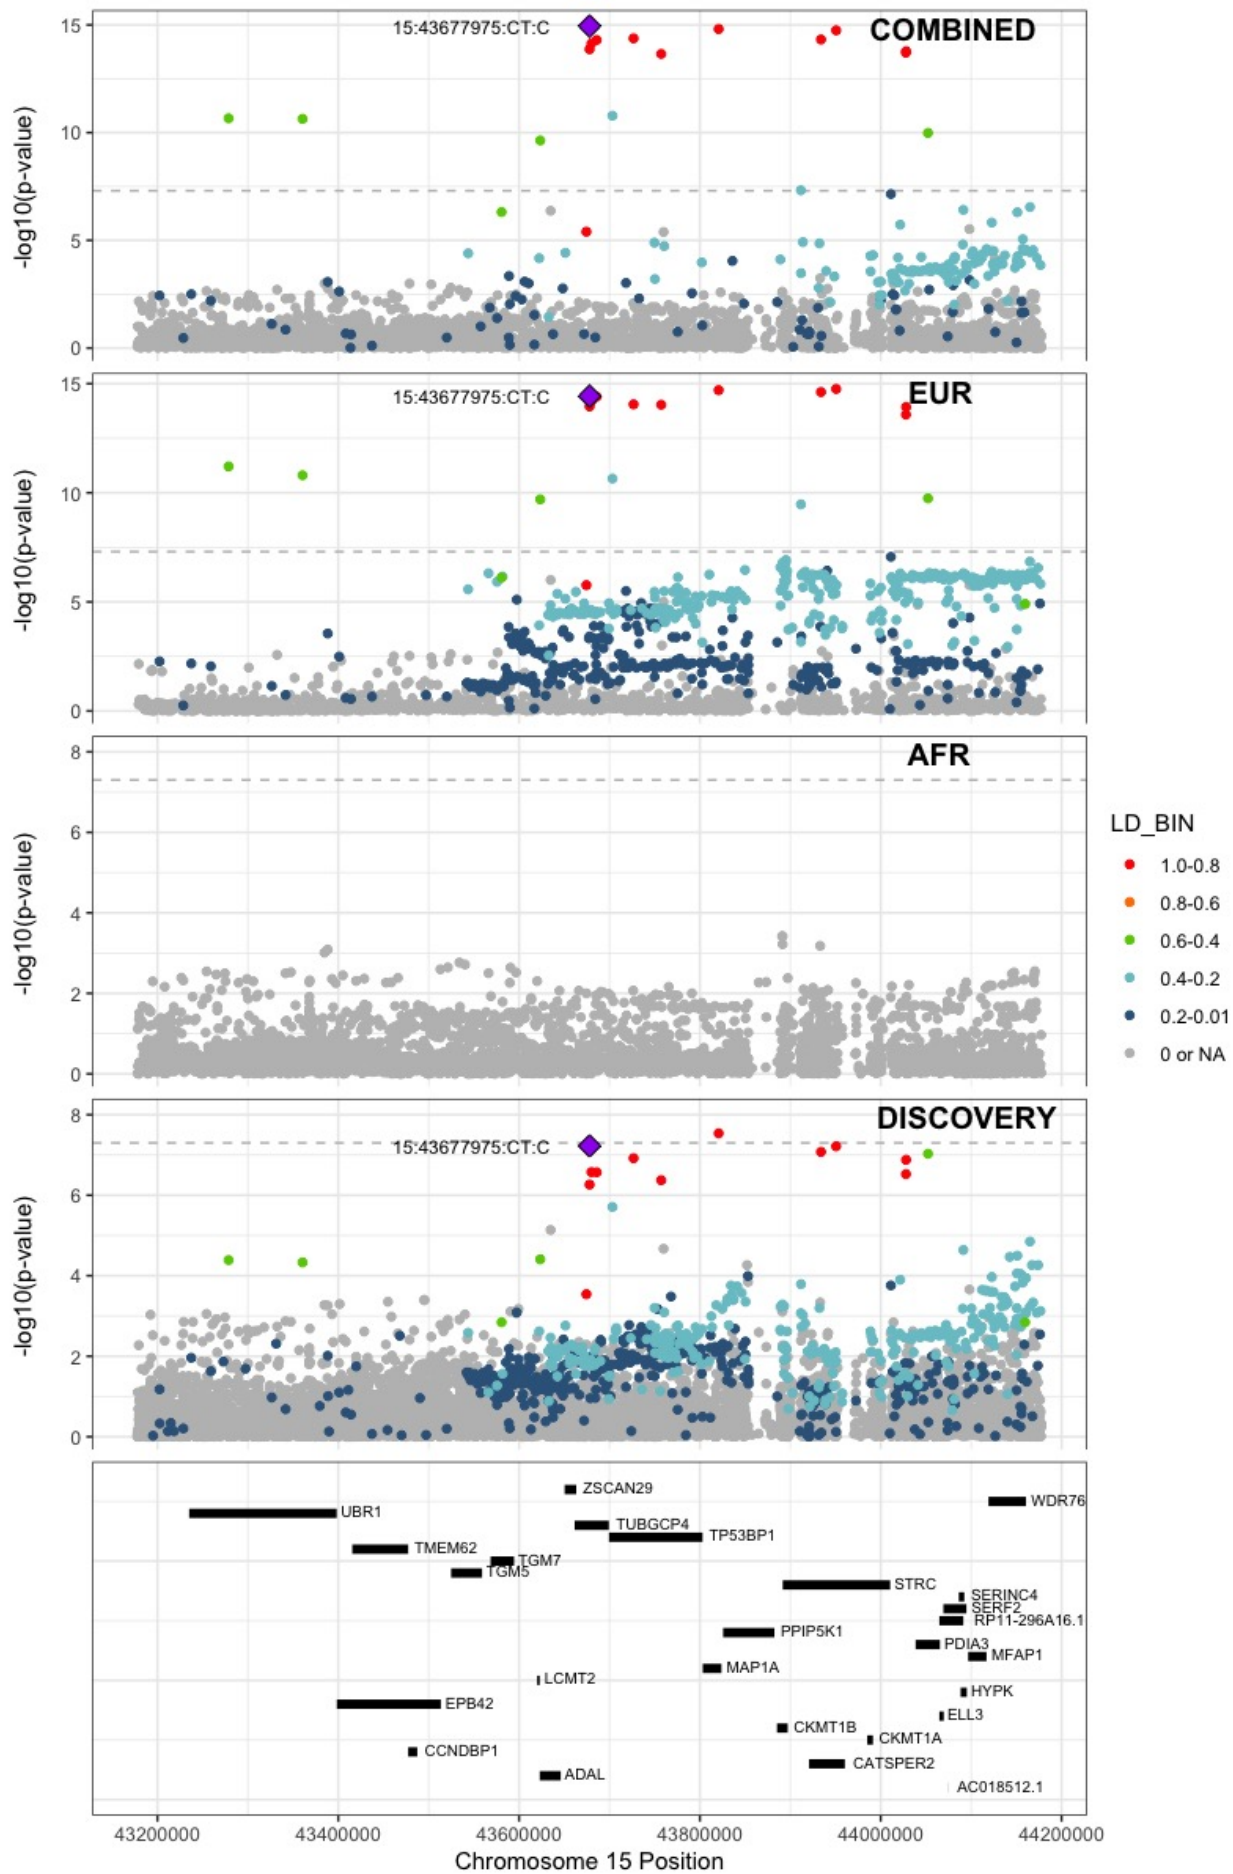

Supplementary Figure 6.81 – rs7183672 (chr15:96101018) in locus 103 (LINC00924;LOC105369212)

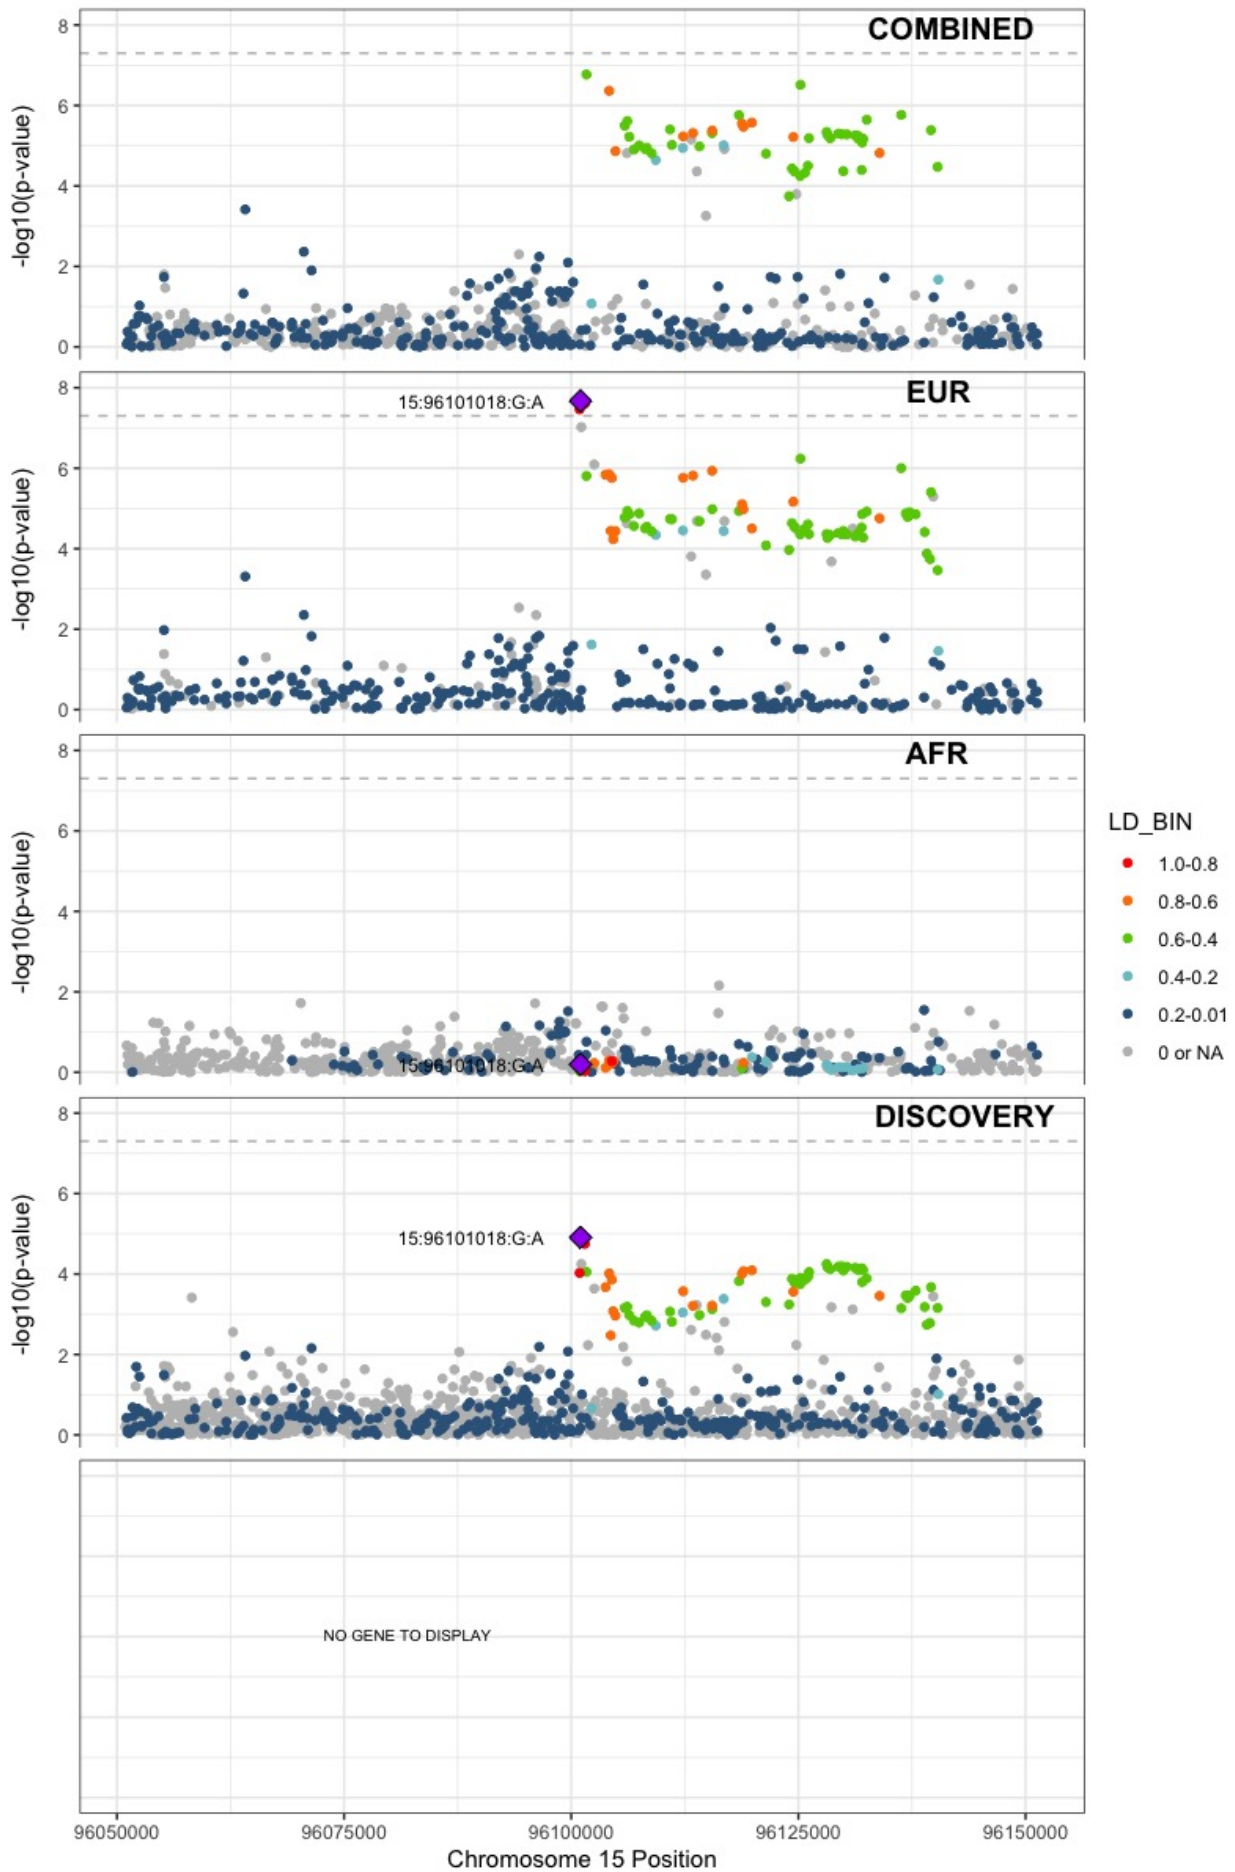

Supplementary Figure 6.82 – rs71376077 (chr16:15738114) in locus 105 (NDE1)

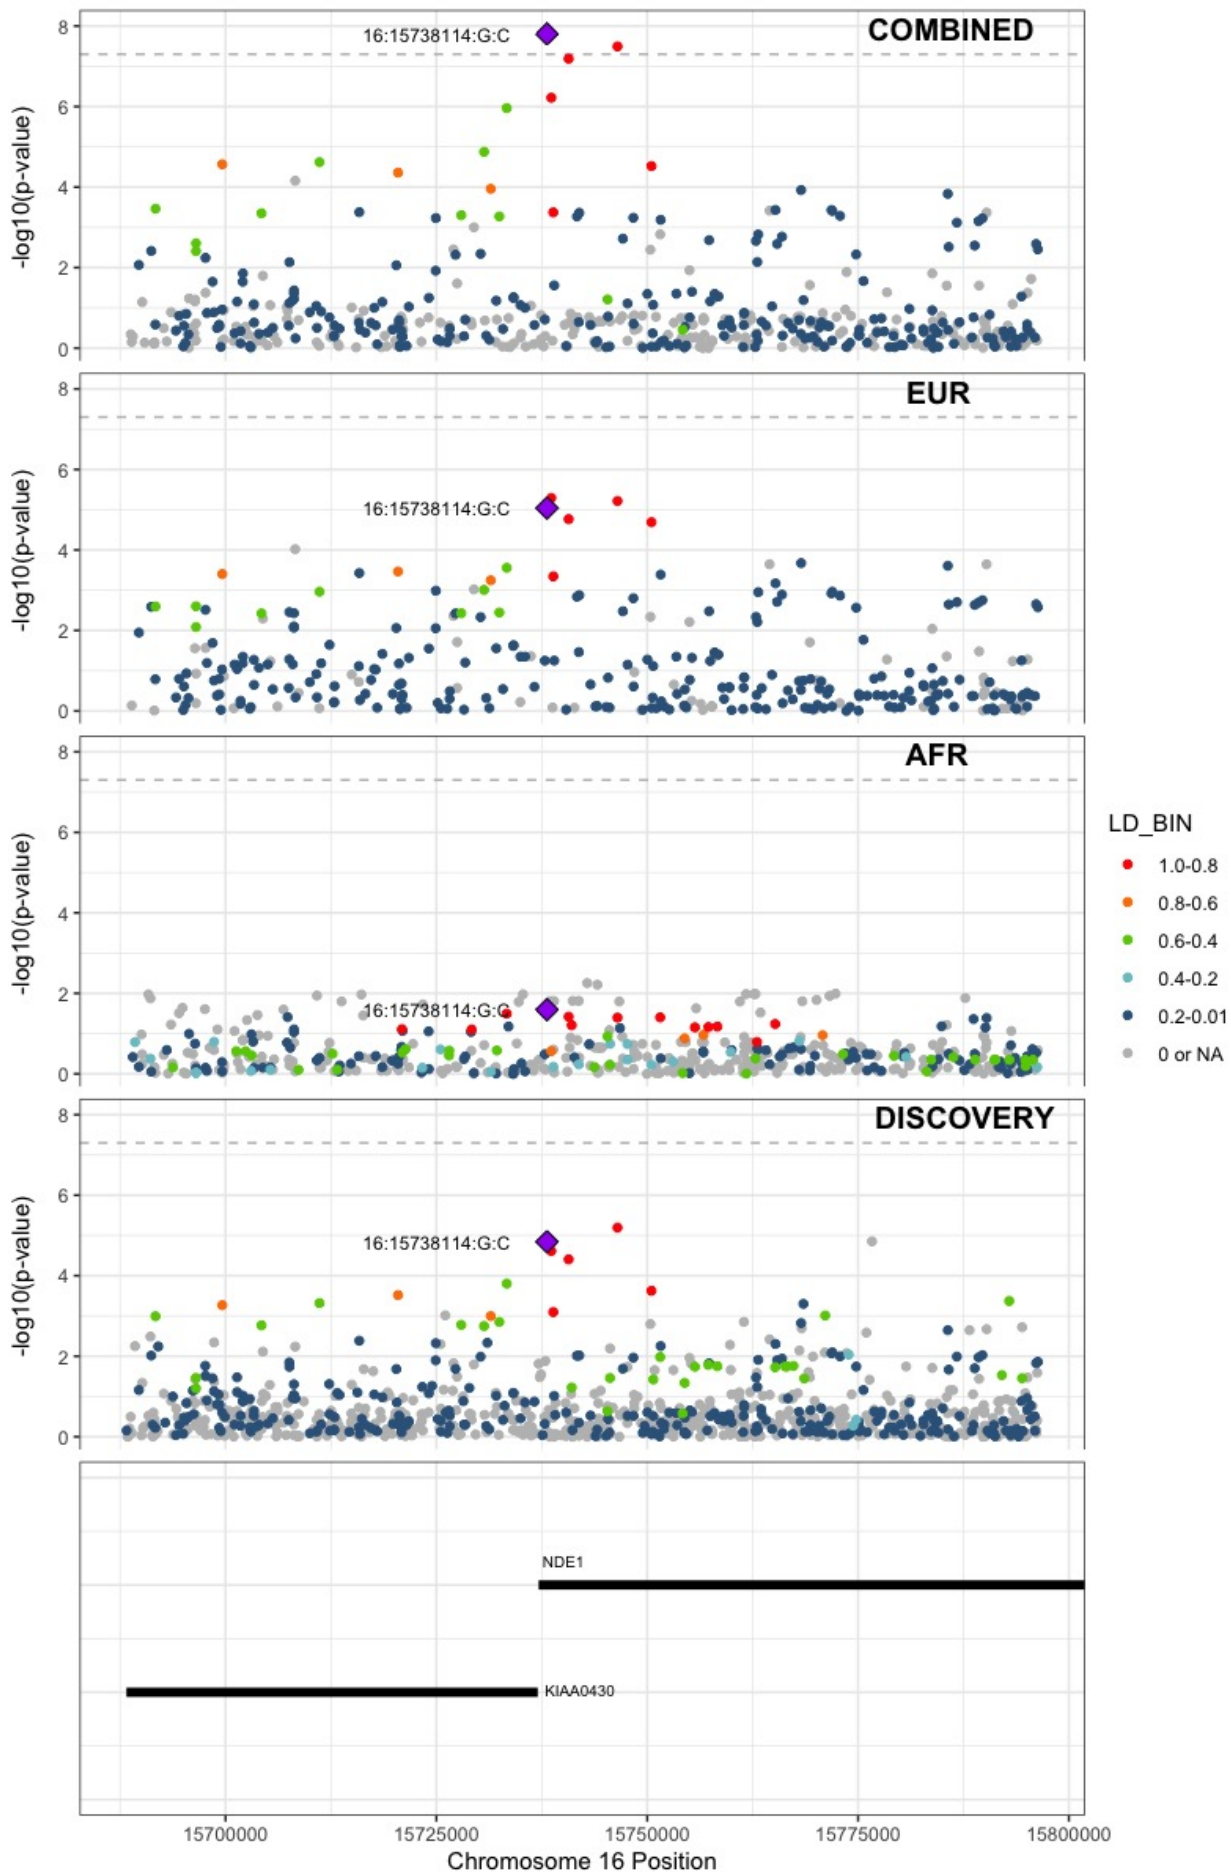

Supplementary Figure 6.83 – rs12443808 (chr16:30996871) in locus 106 (HSD3B7)

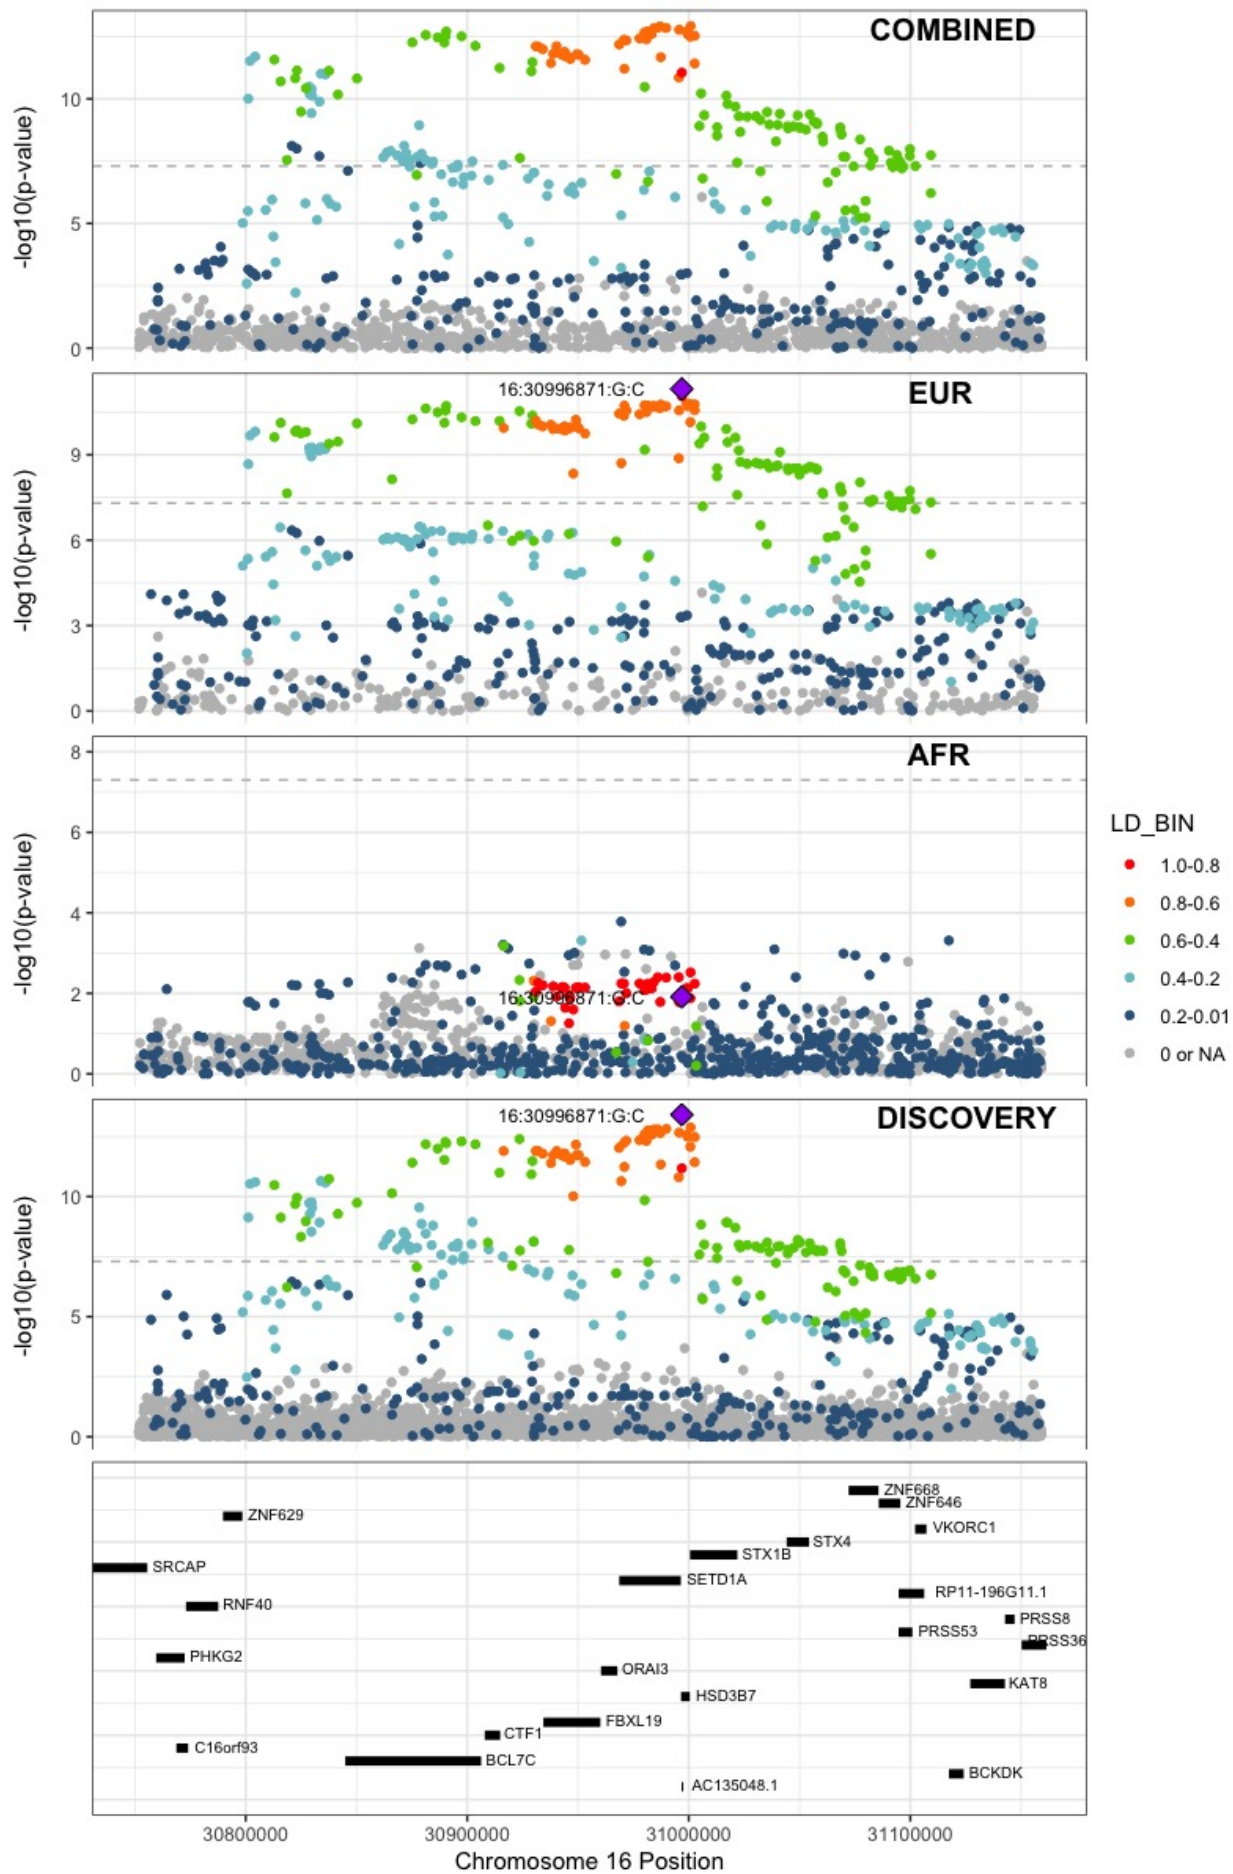

Supplementary Figure 6.84 – rs7197453 (chr16:72079127) in locus 107 (DHODH;HP)

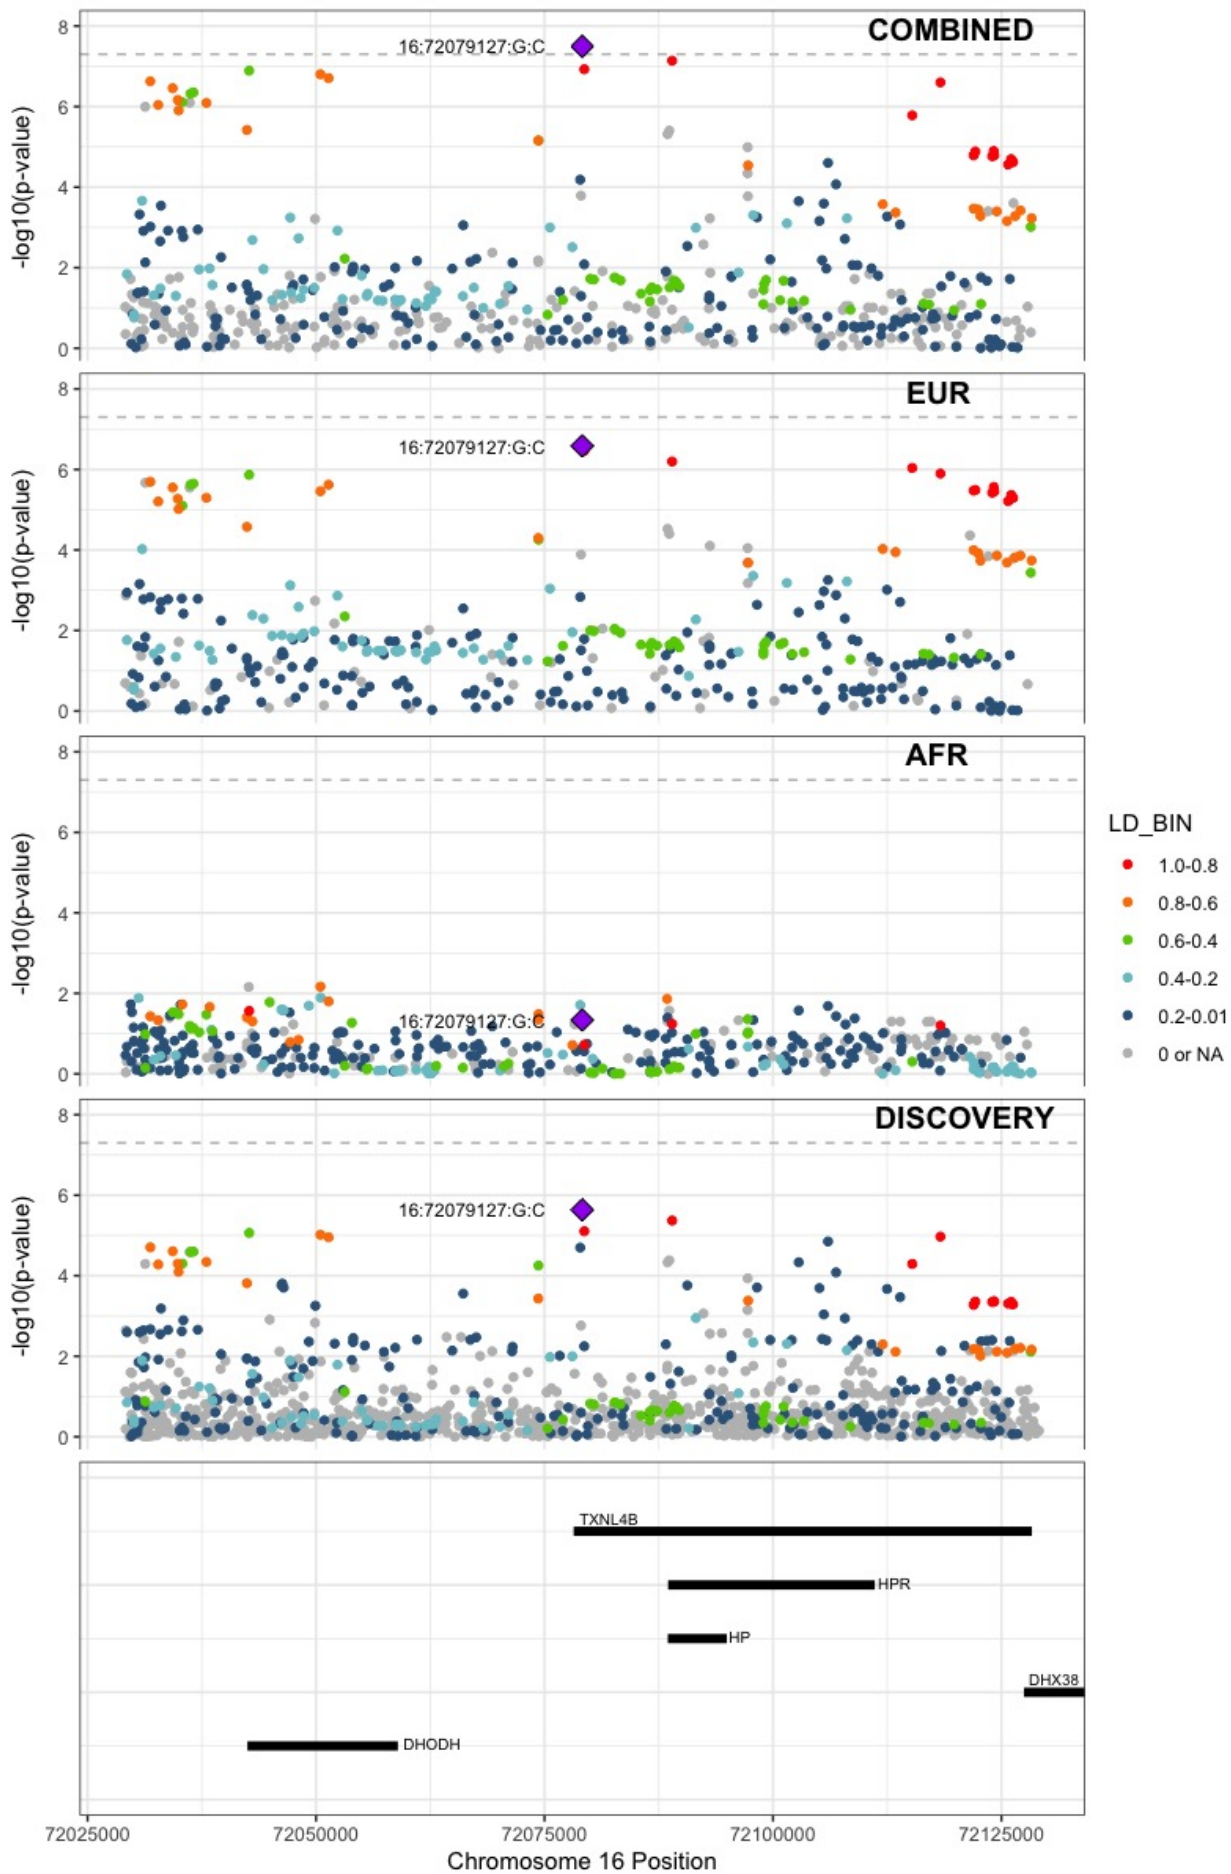

Supplementary Figure 6.85 – rs77246010 (chr16:75429853) in locus 108 (CFDP1)

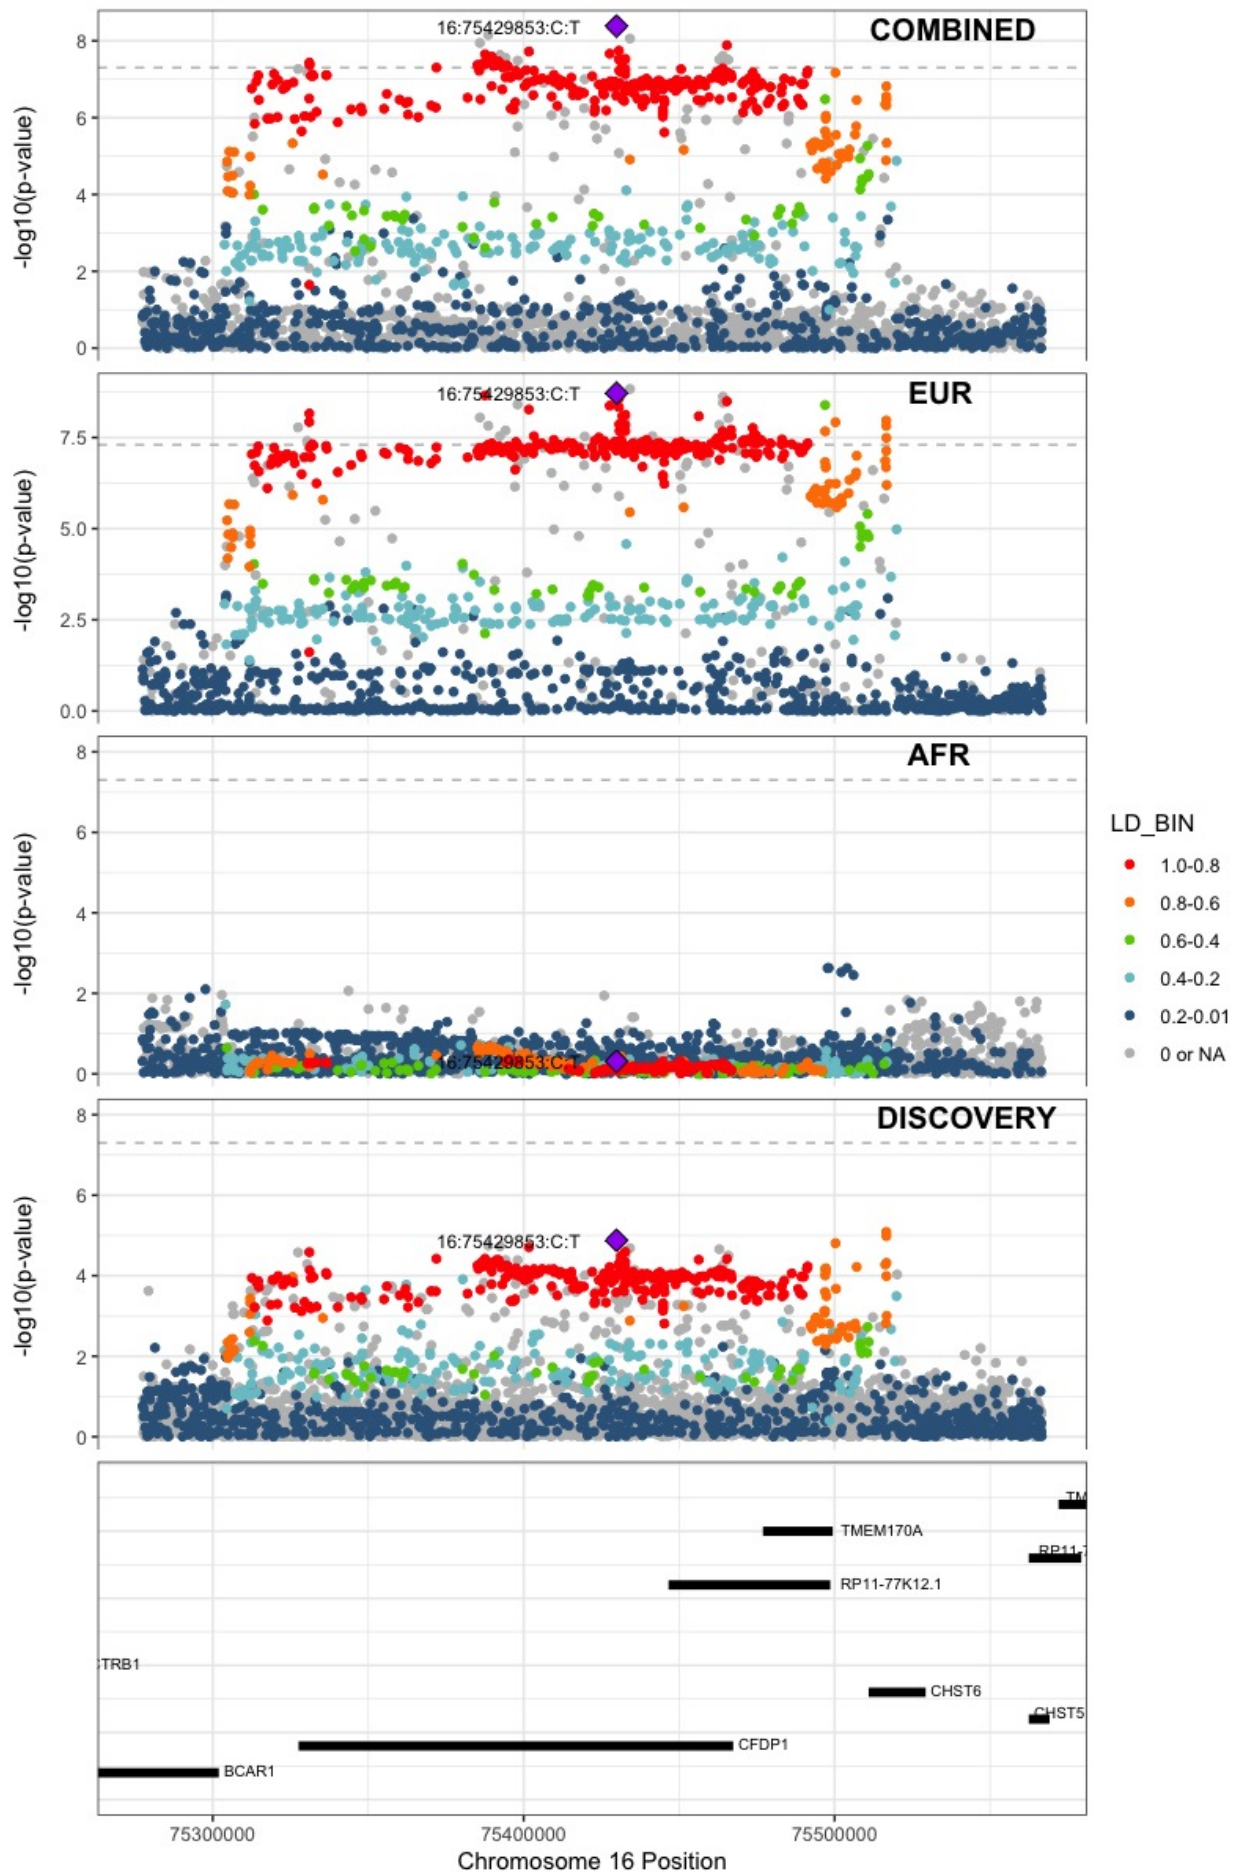



Supplementary Figure 6.86 – rs12445050 (chr16:81870969) in locus 109 (PLCG2)

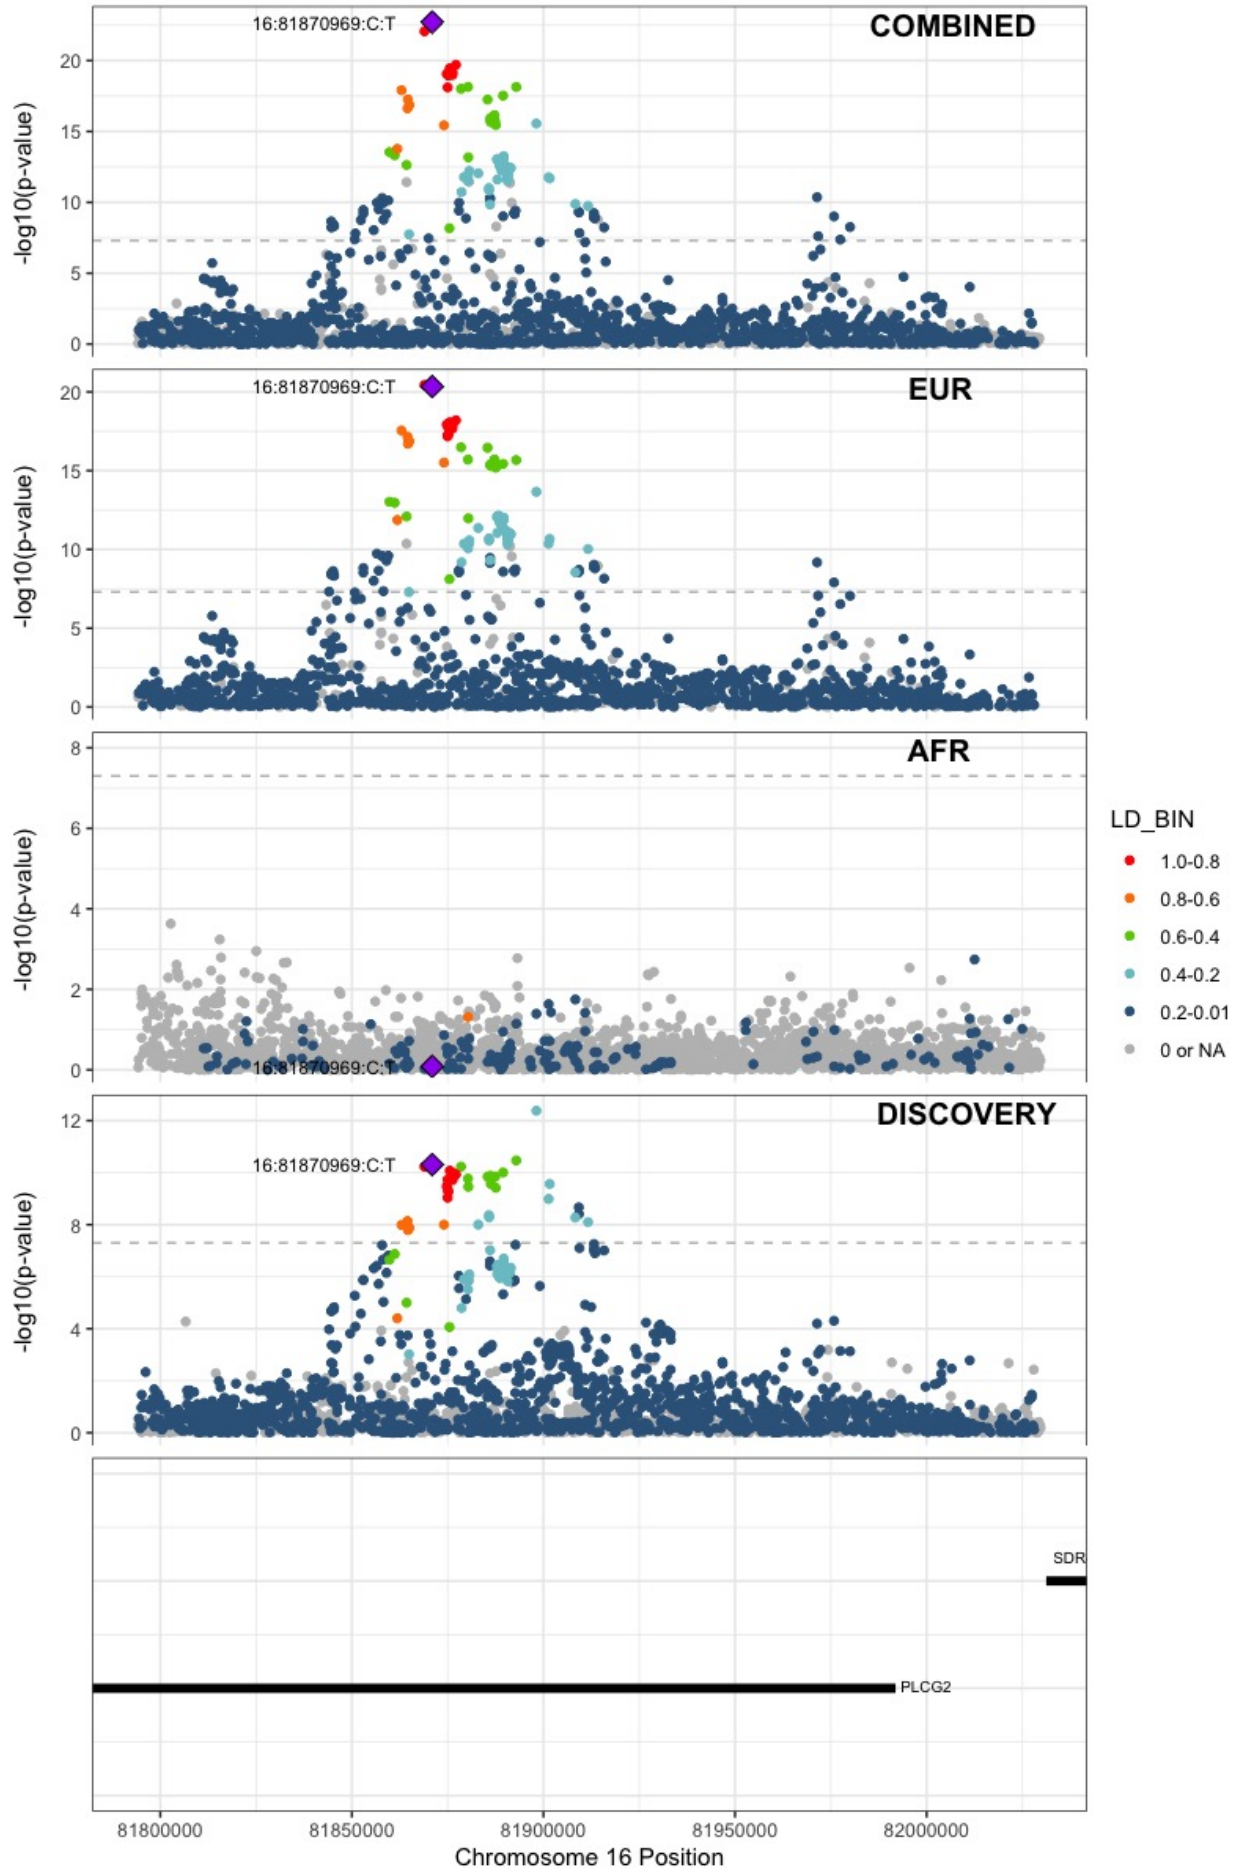

Supplementary Figure 6.87 – rs8049403 (chr16:85778651) in locus 110 (C16orf74)

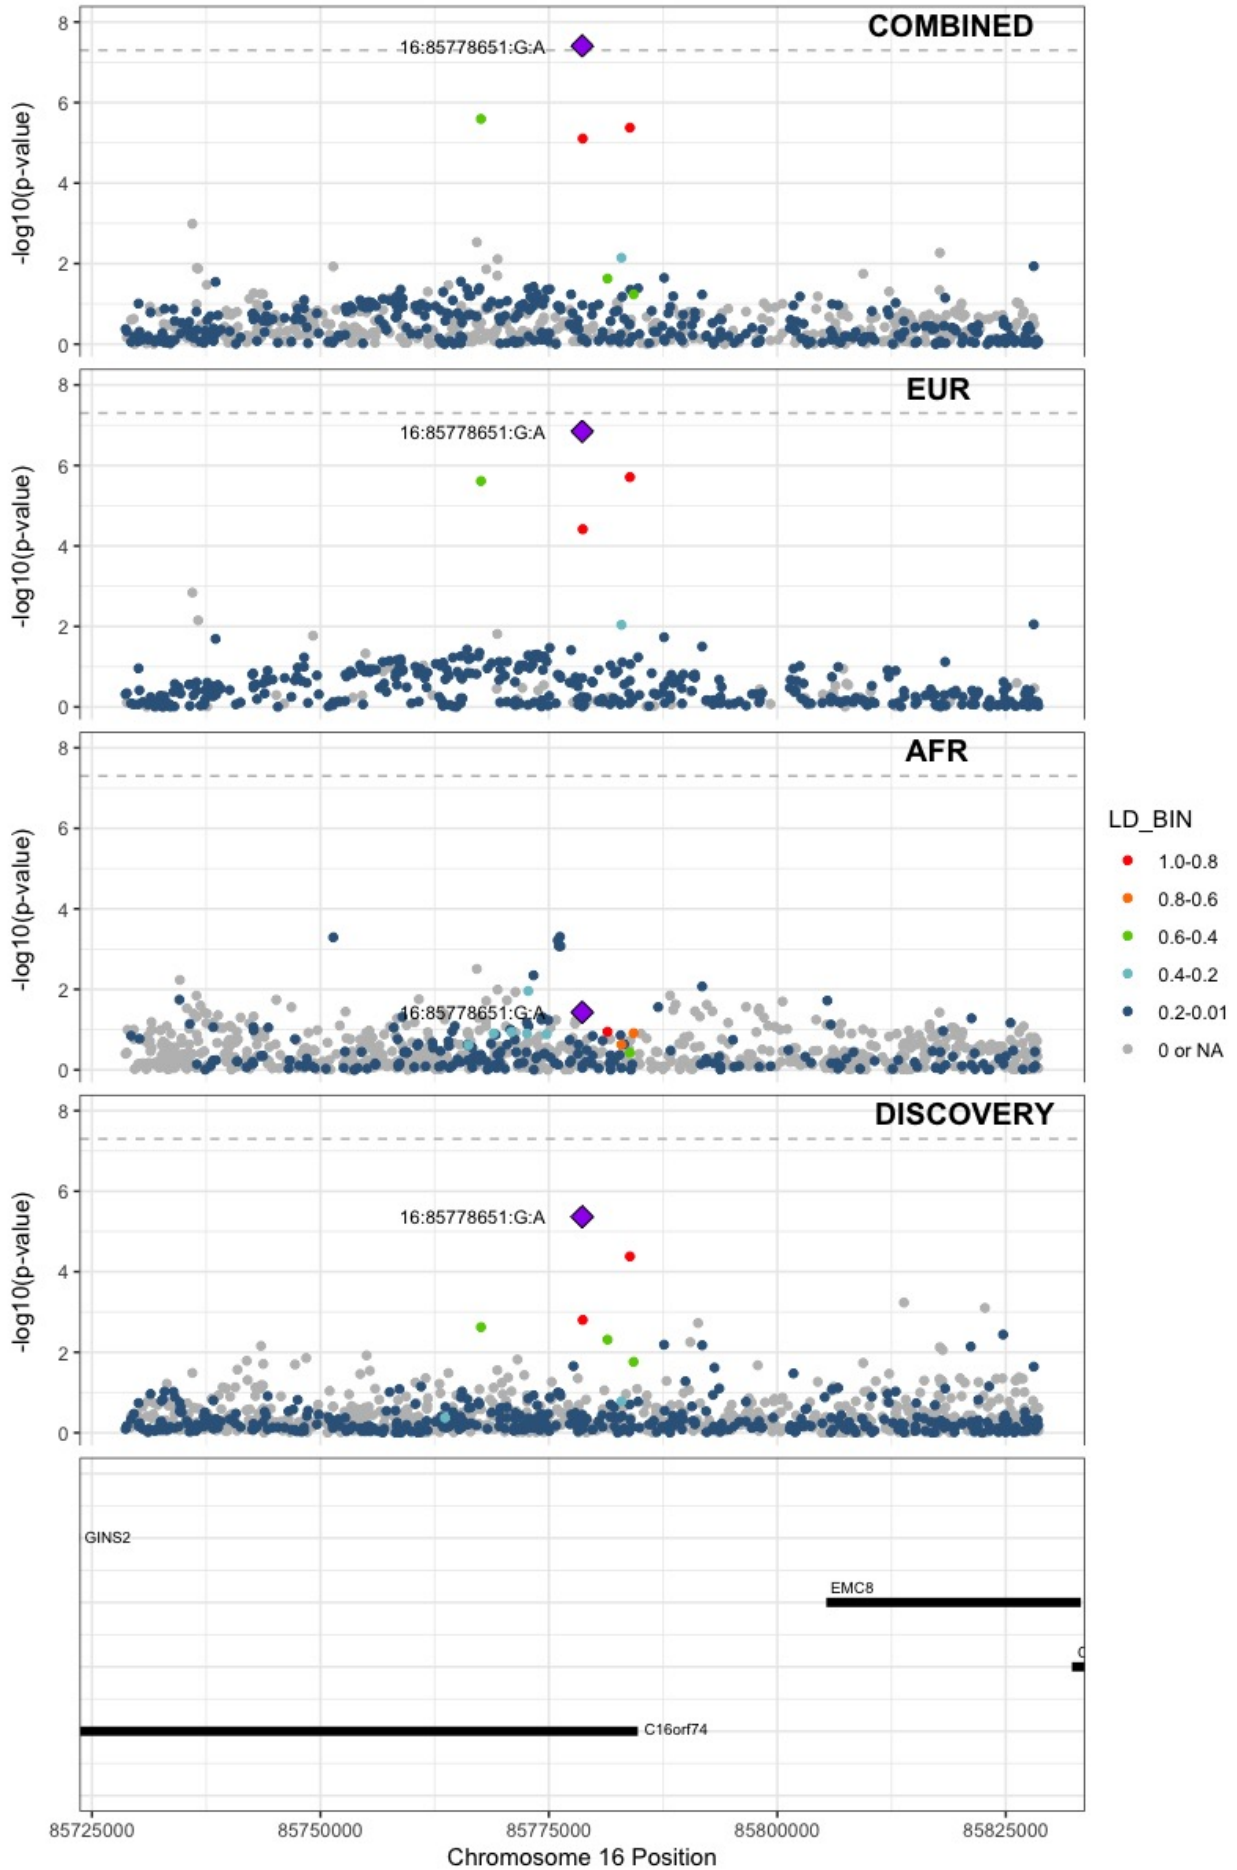

Supplementary Figure 6.88 – rs28634651 (chr16:88553198) in locus 111 (ZFPM1)

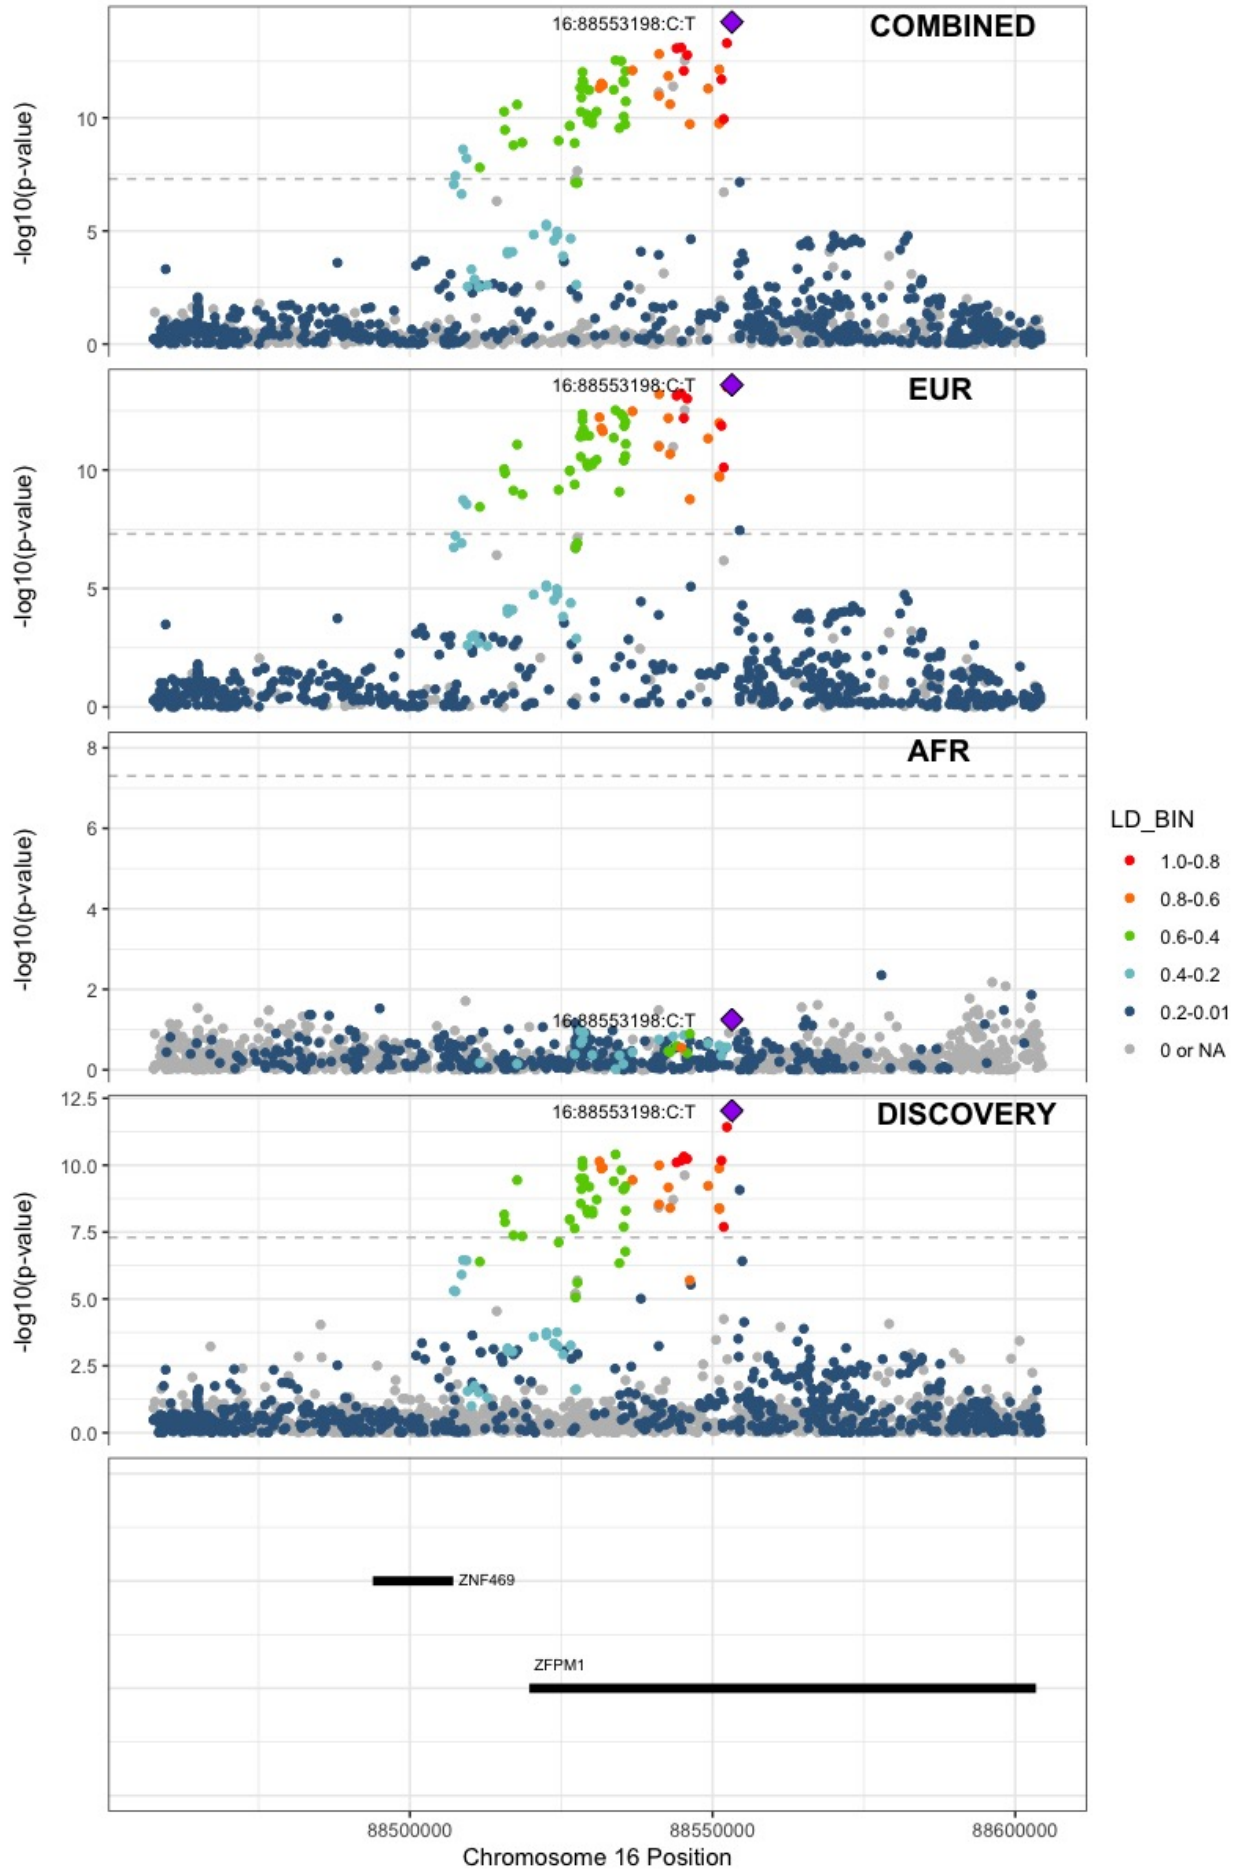

Supplementary Figure 6.89 – rs6503222 (chr17:1977862) in locus 112 (SMG6)

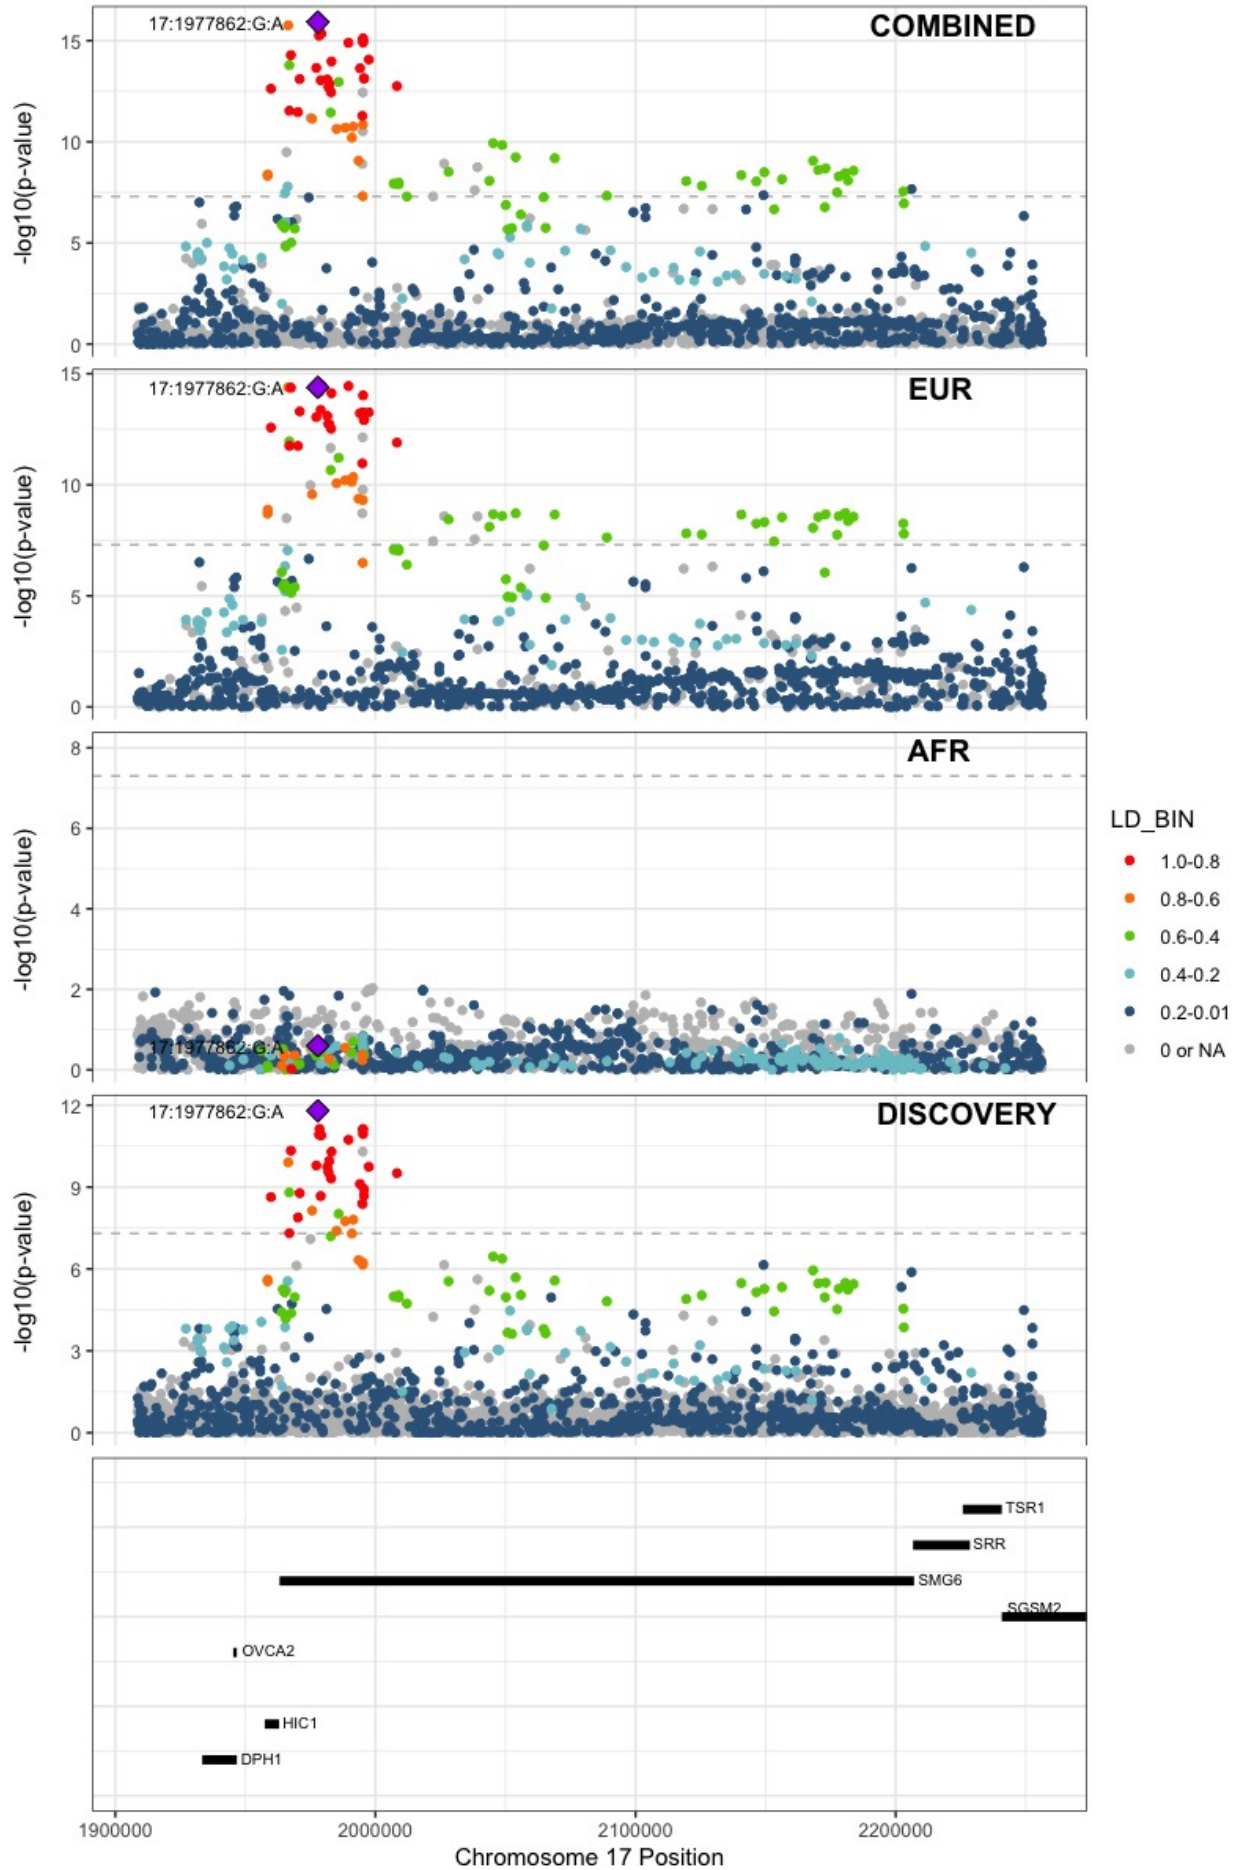

Supplementary Figure 6.90 – rs434473 (chr17:6904934) in locus 113 (ALOX12)

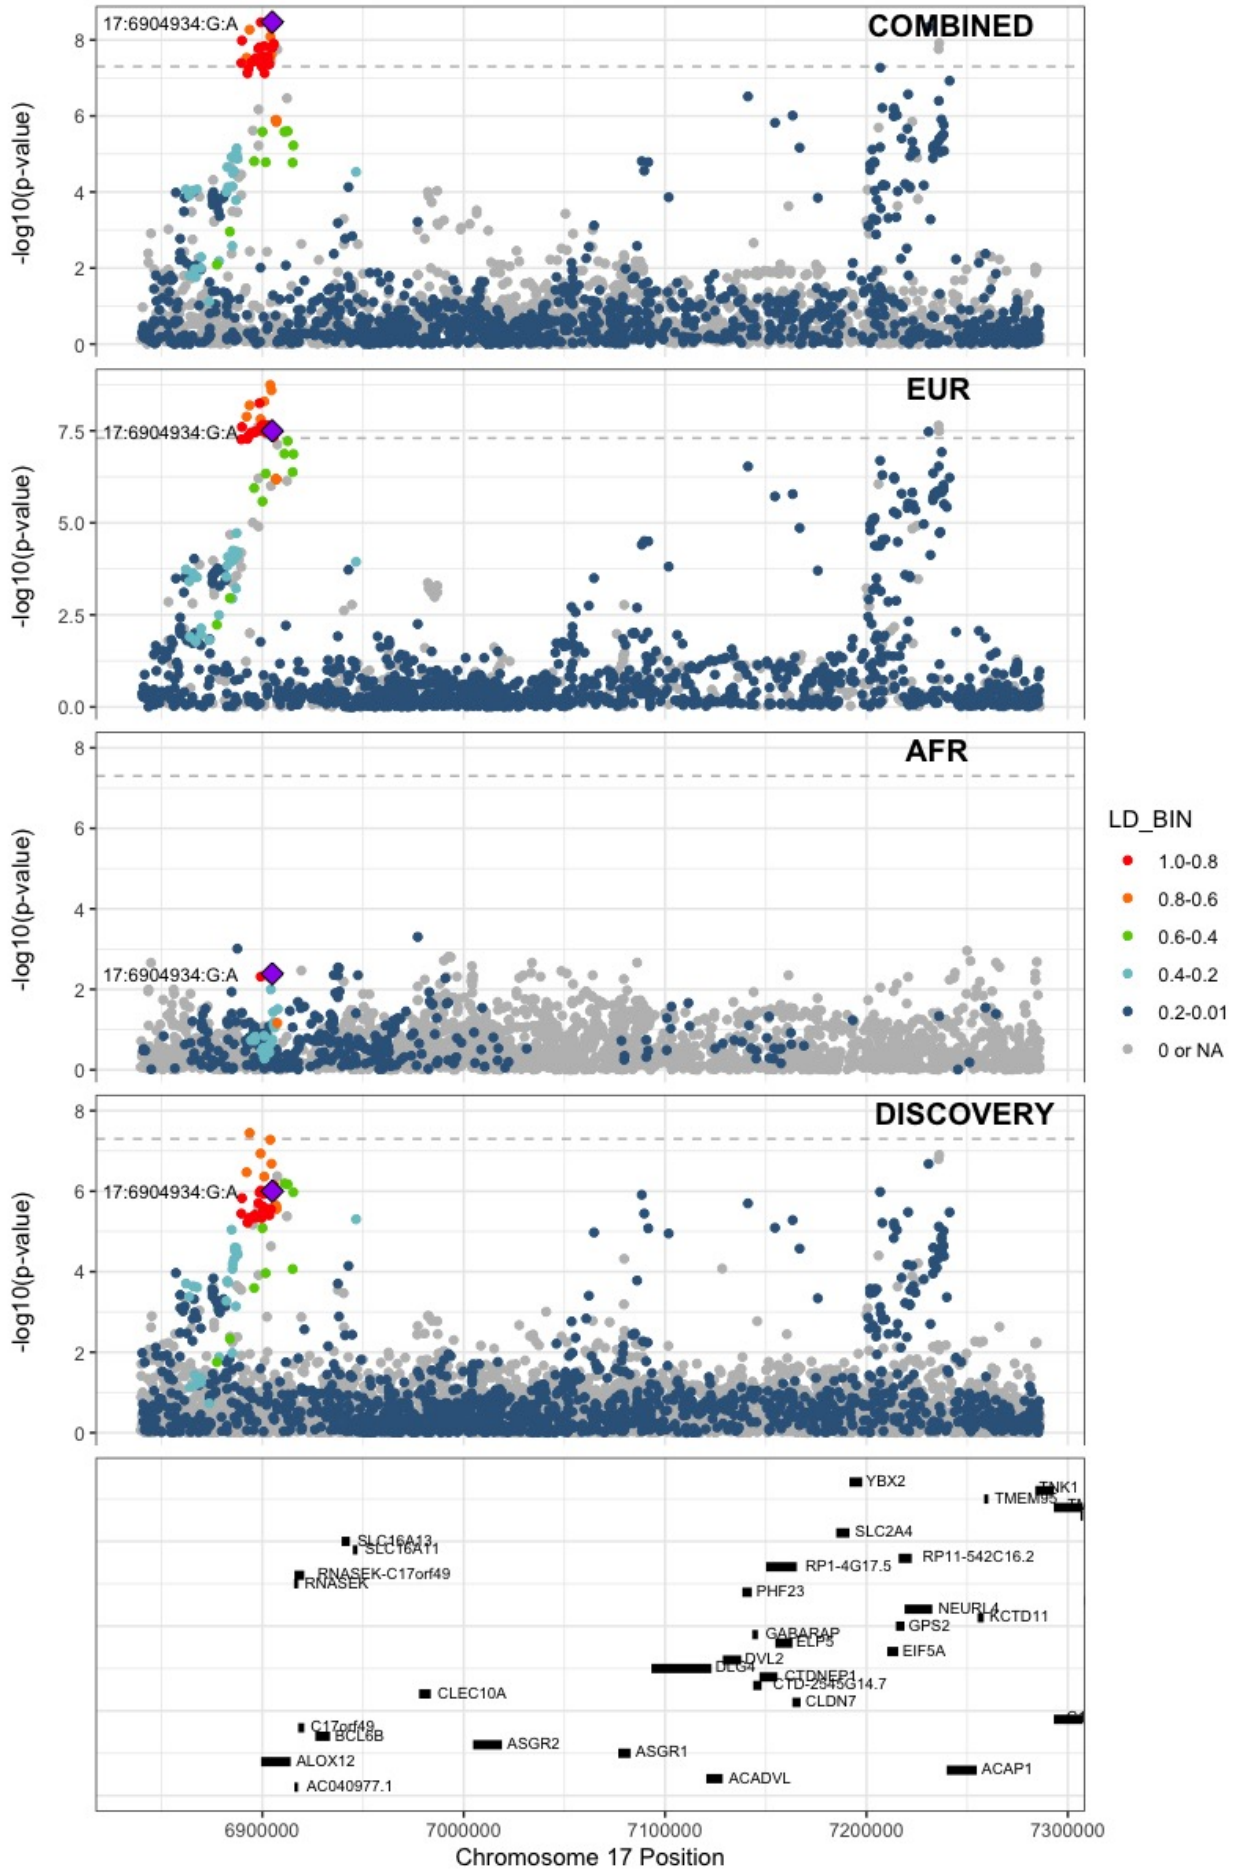

Supplementary Figure 6.91 – rs71138827 (chr17:27833678) in locus 114 (TAOK1)

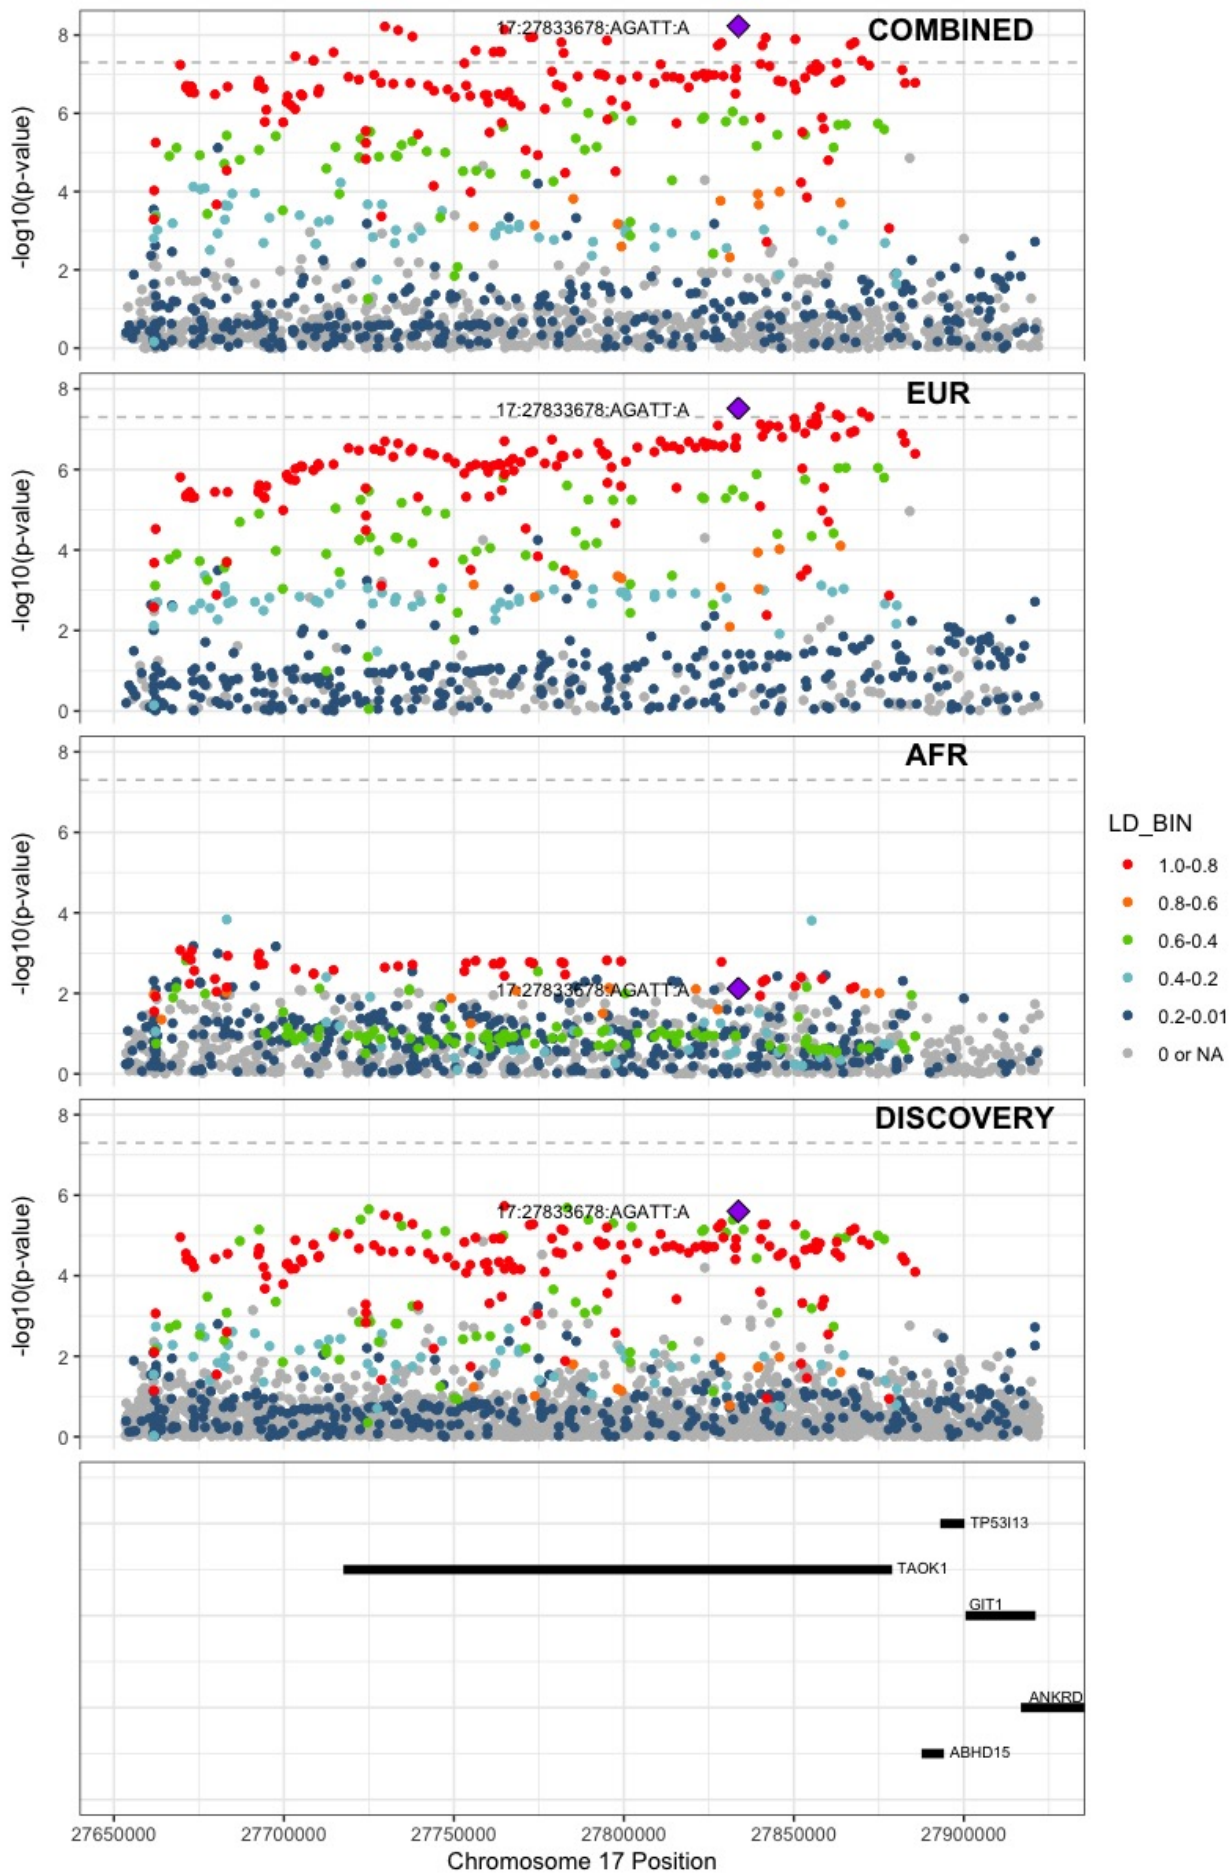

Supplementary Figure 6.92 – rs62054822 (chr17:43927708) in locus 115 (MAPT-AS1)

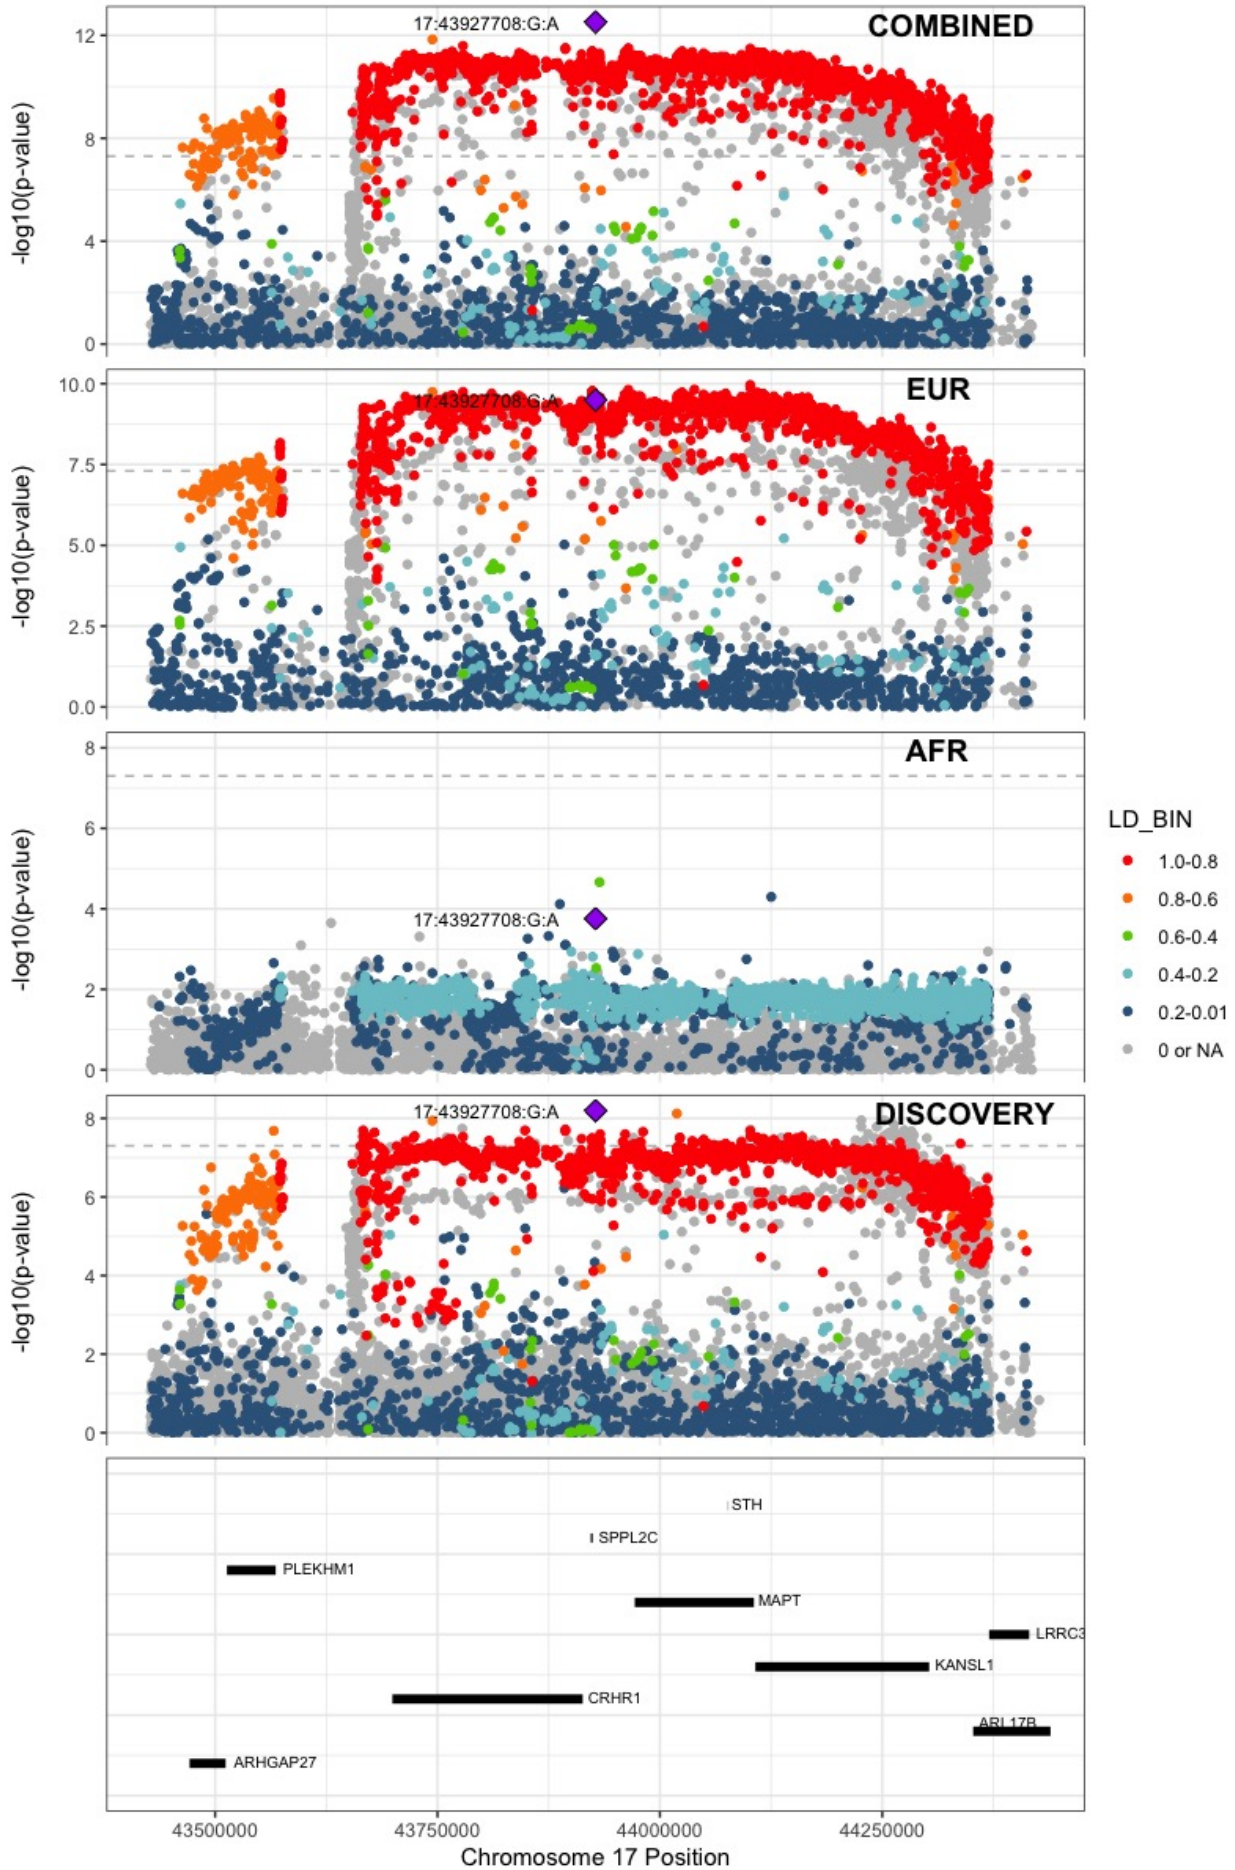

Supplementary Figure 6.93 – rs1801690 (chr17:64208285) in locus 116 (APOH)

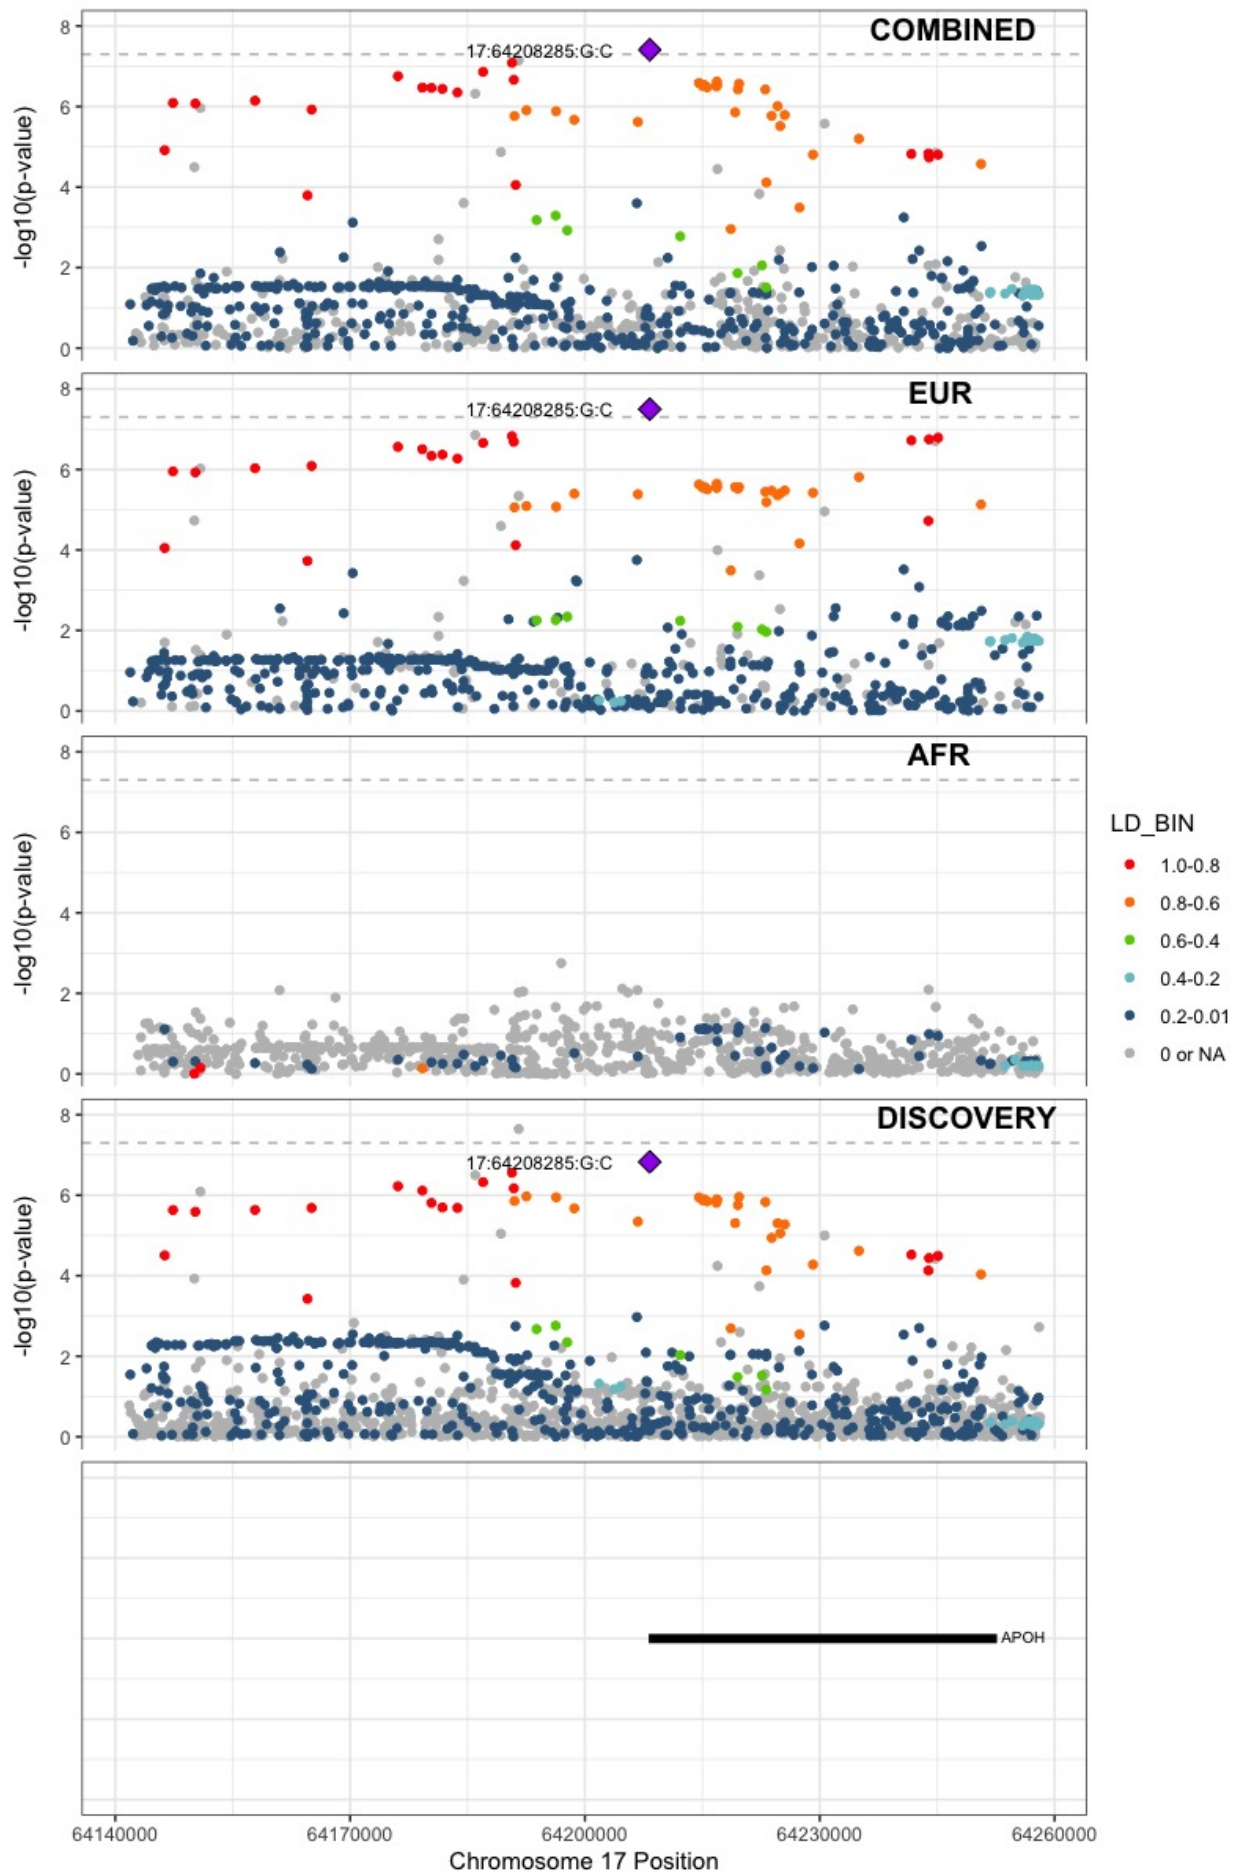



Supplementary Figure 6.94 – rs573431210 (chr17:67276383) in locus 117 (ABCA5)

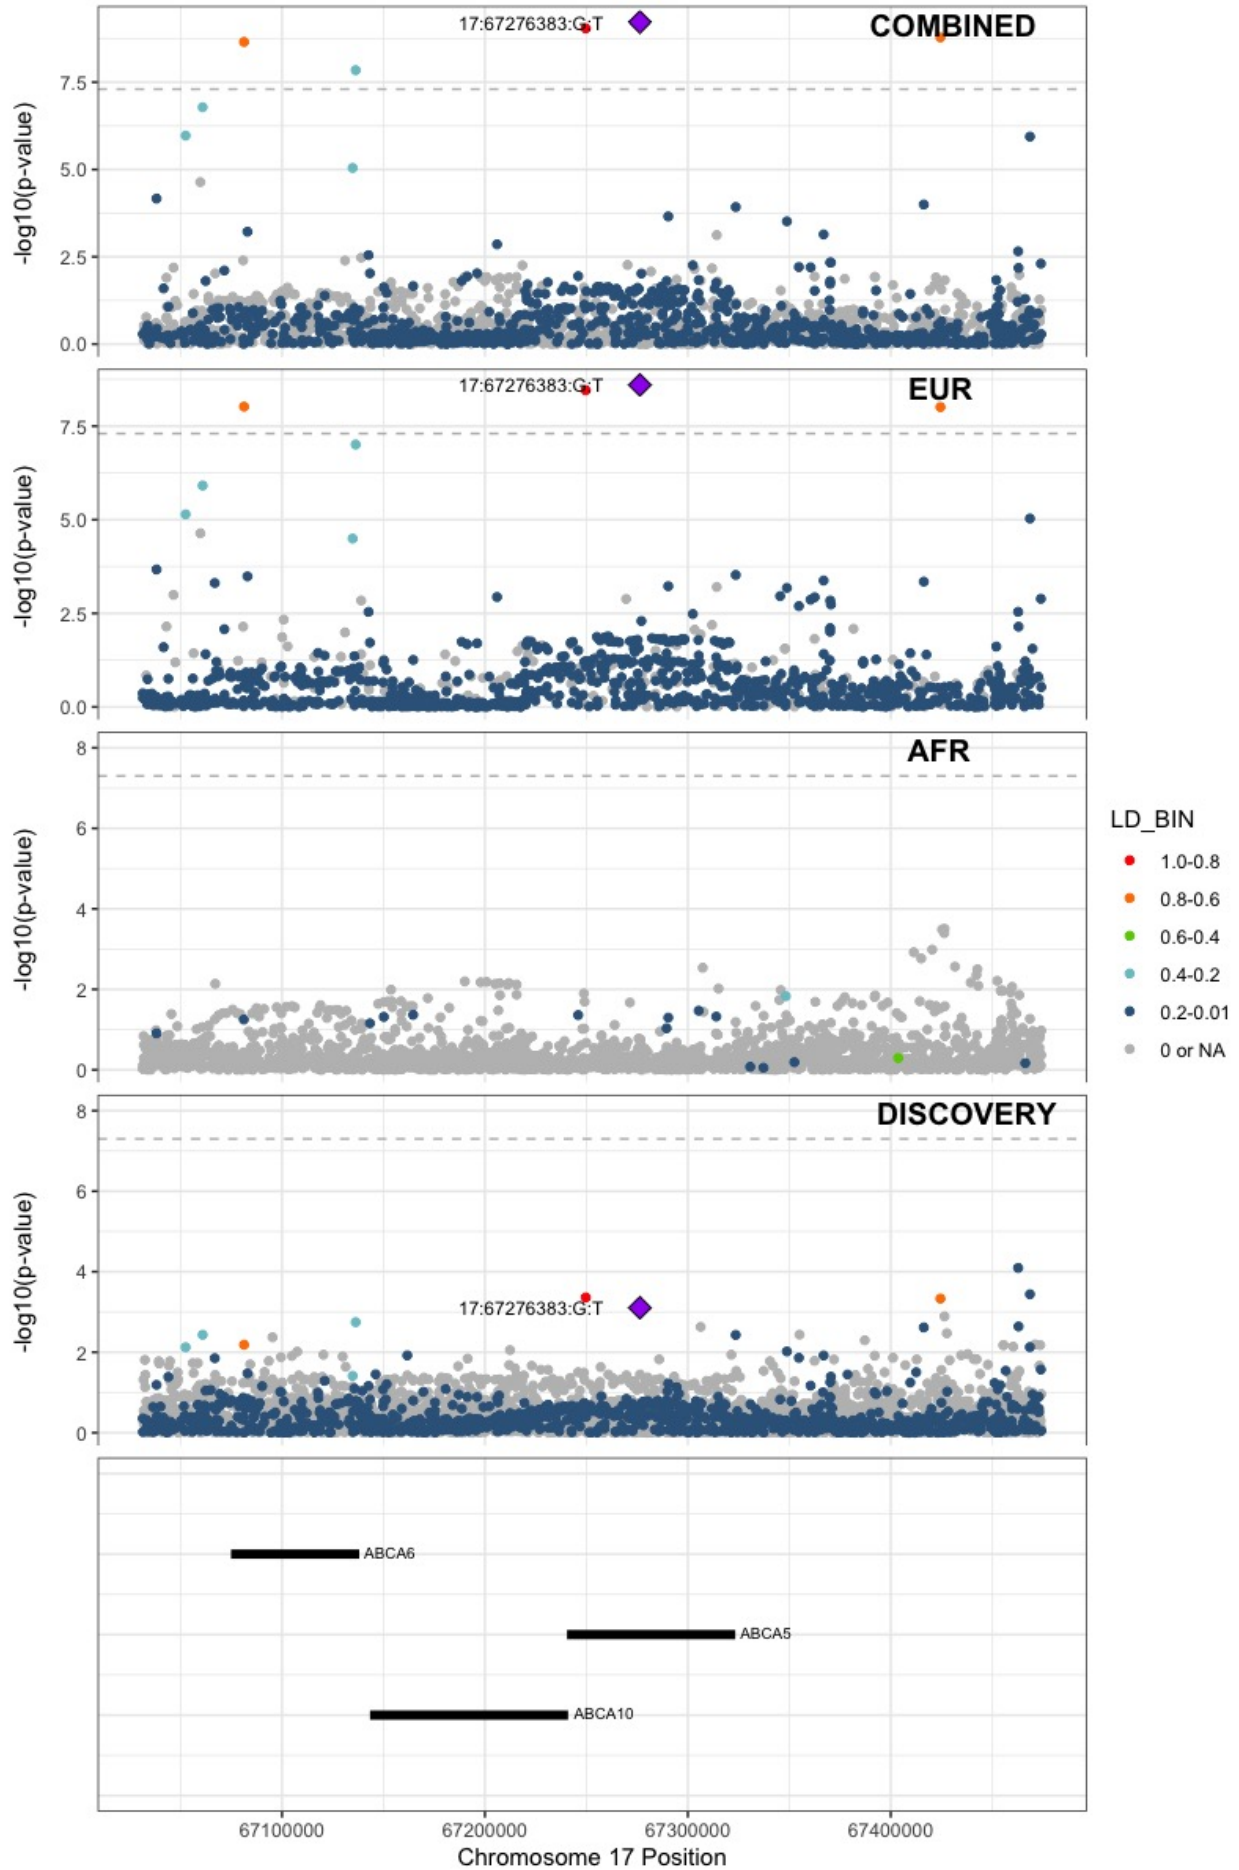

Supplementary Figure 6.95 – rs59277920 (chr19:6077231) in locus 118 (RFX2)

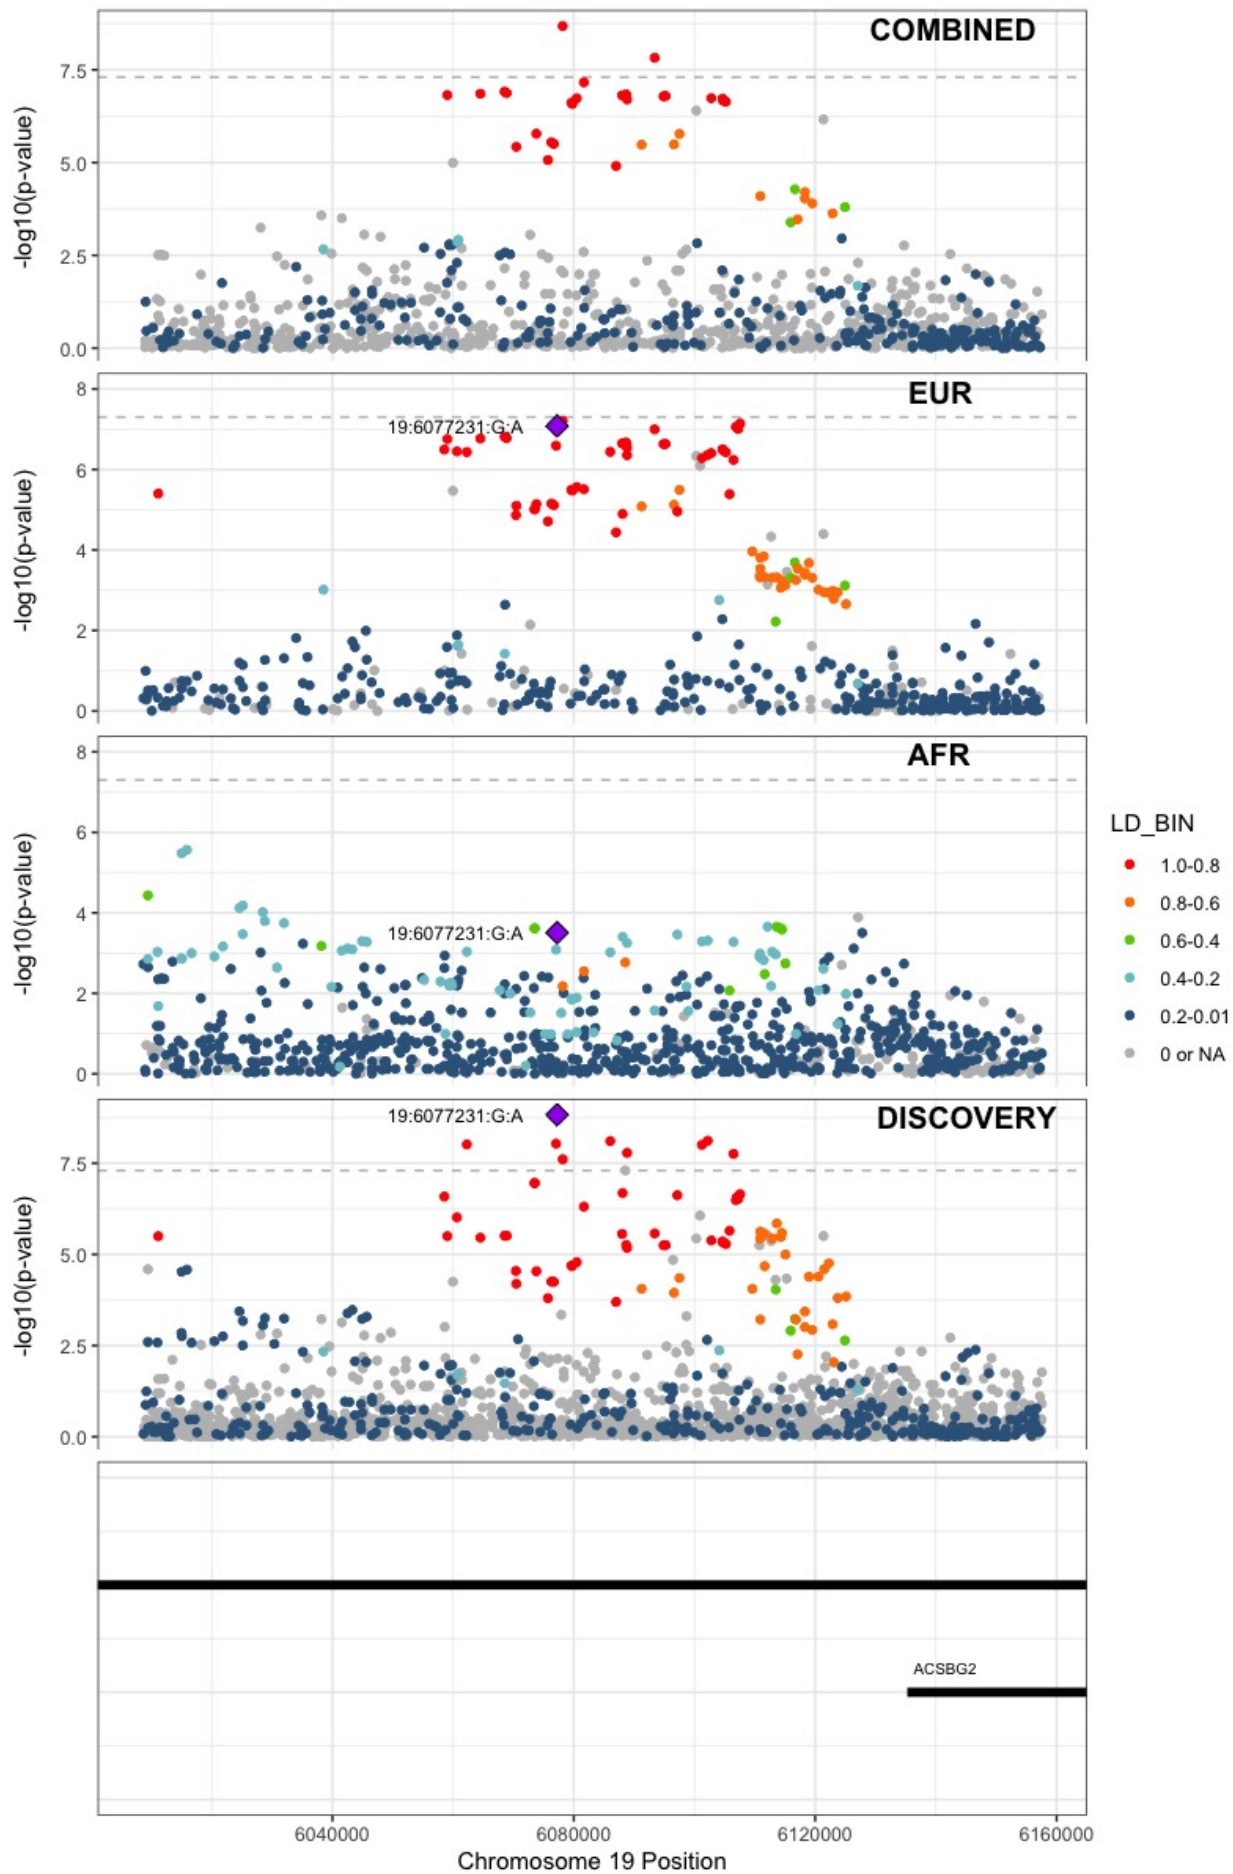

Supplementary Figure 6.96 – rs8110055 (chr19:10739143) in locus 119 (SLC44A2)

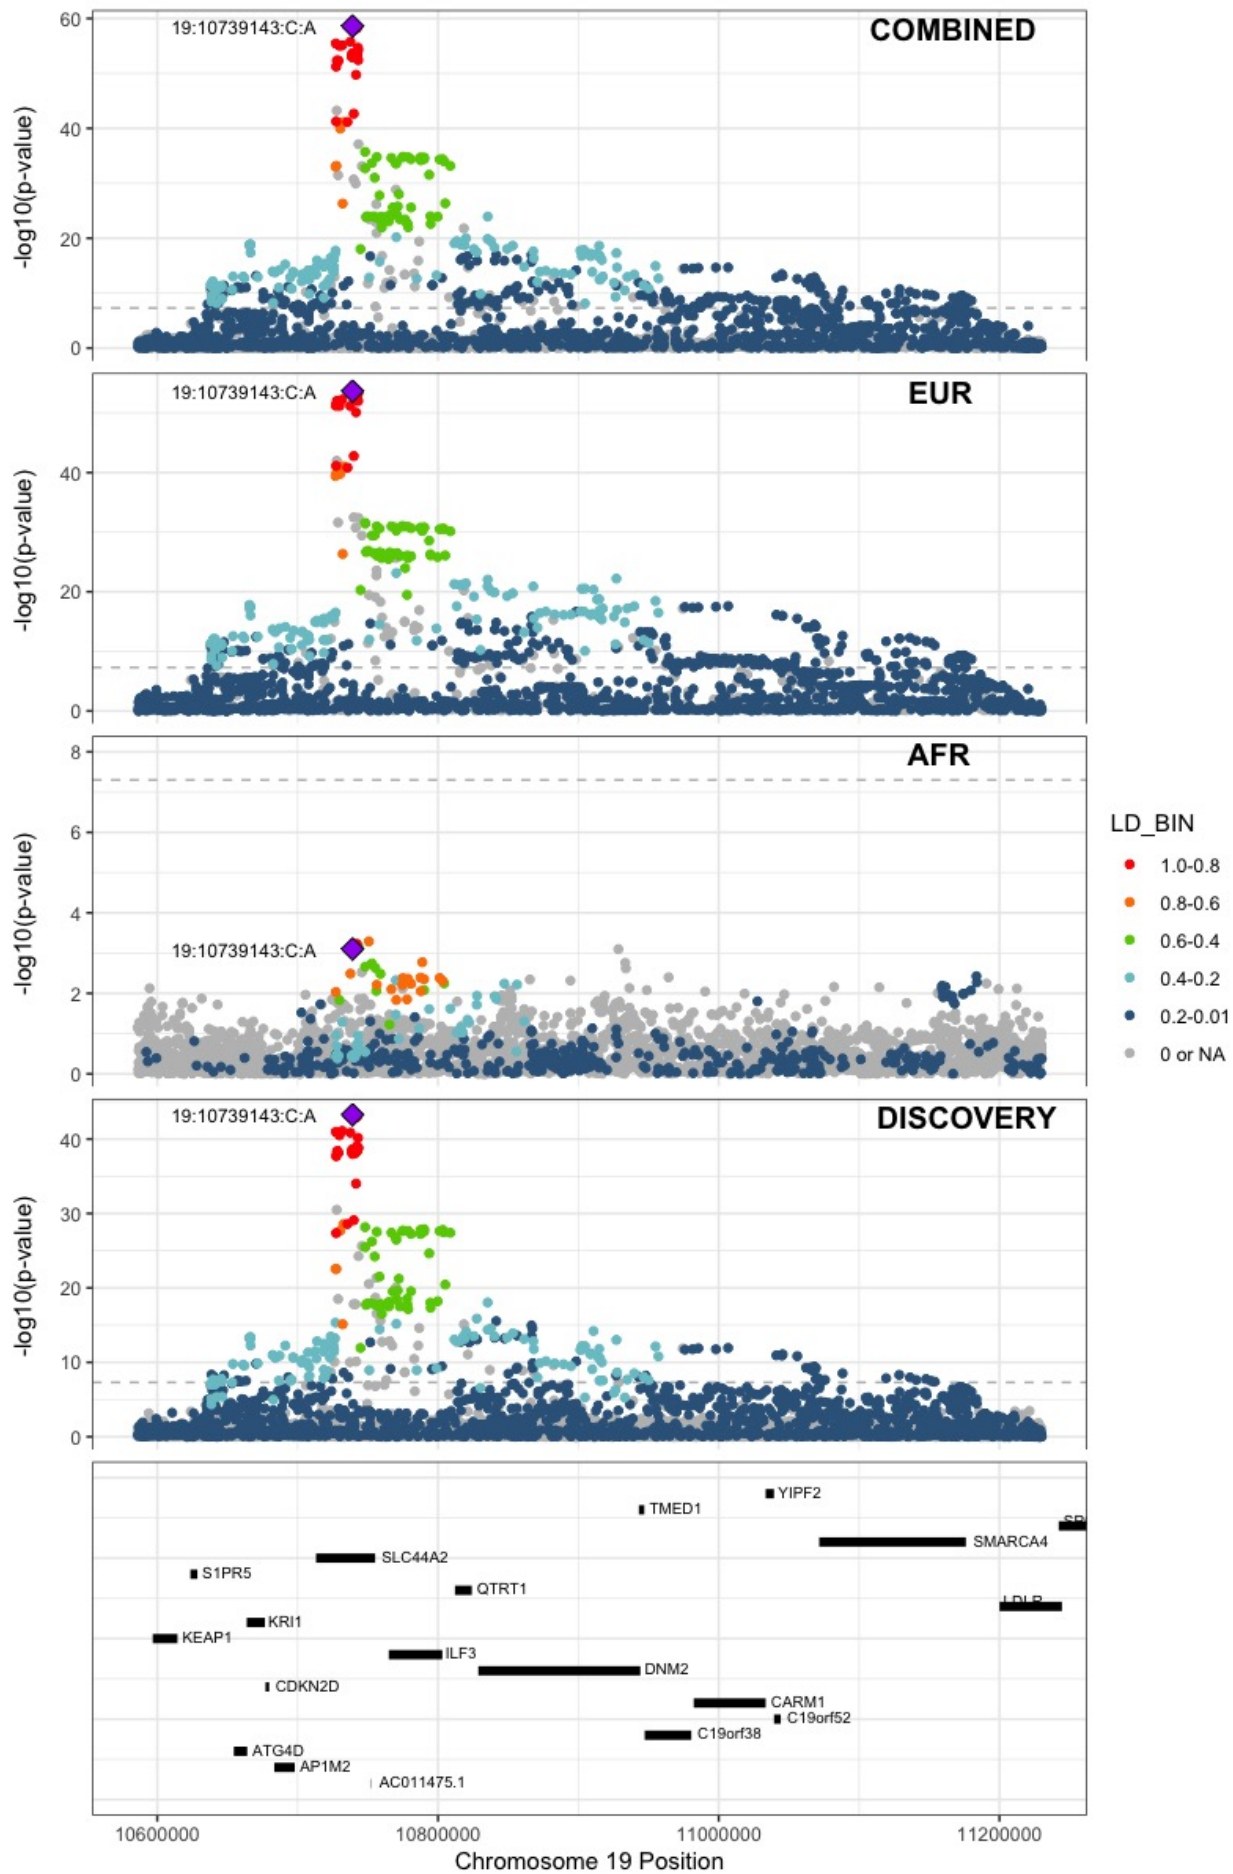

Supplementary Figure 6.97 – rs889139 (chr19:33889369) in locus 120 (PEPD)

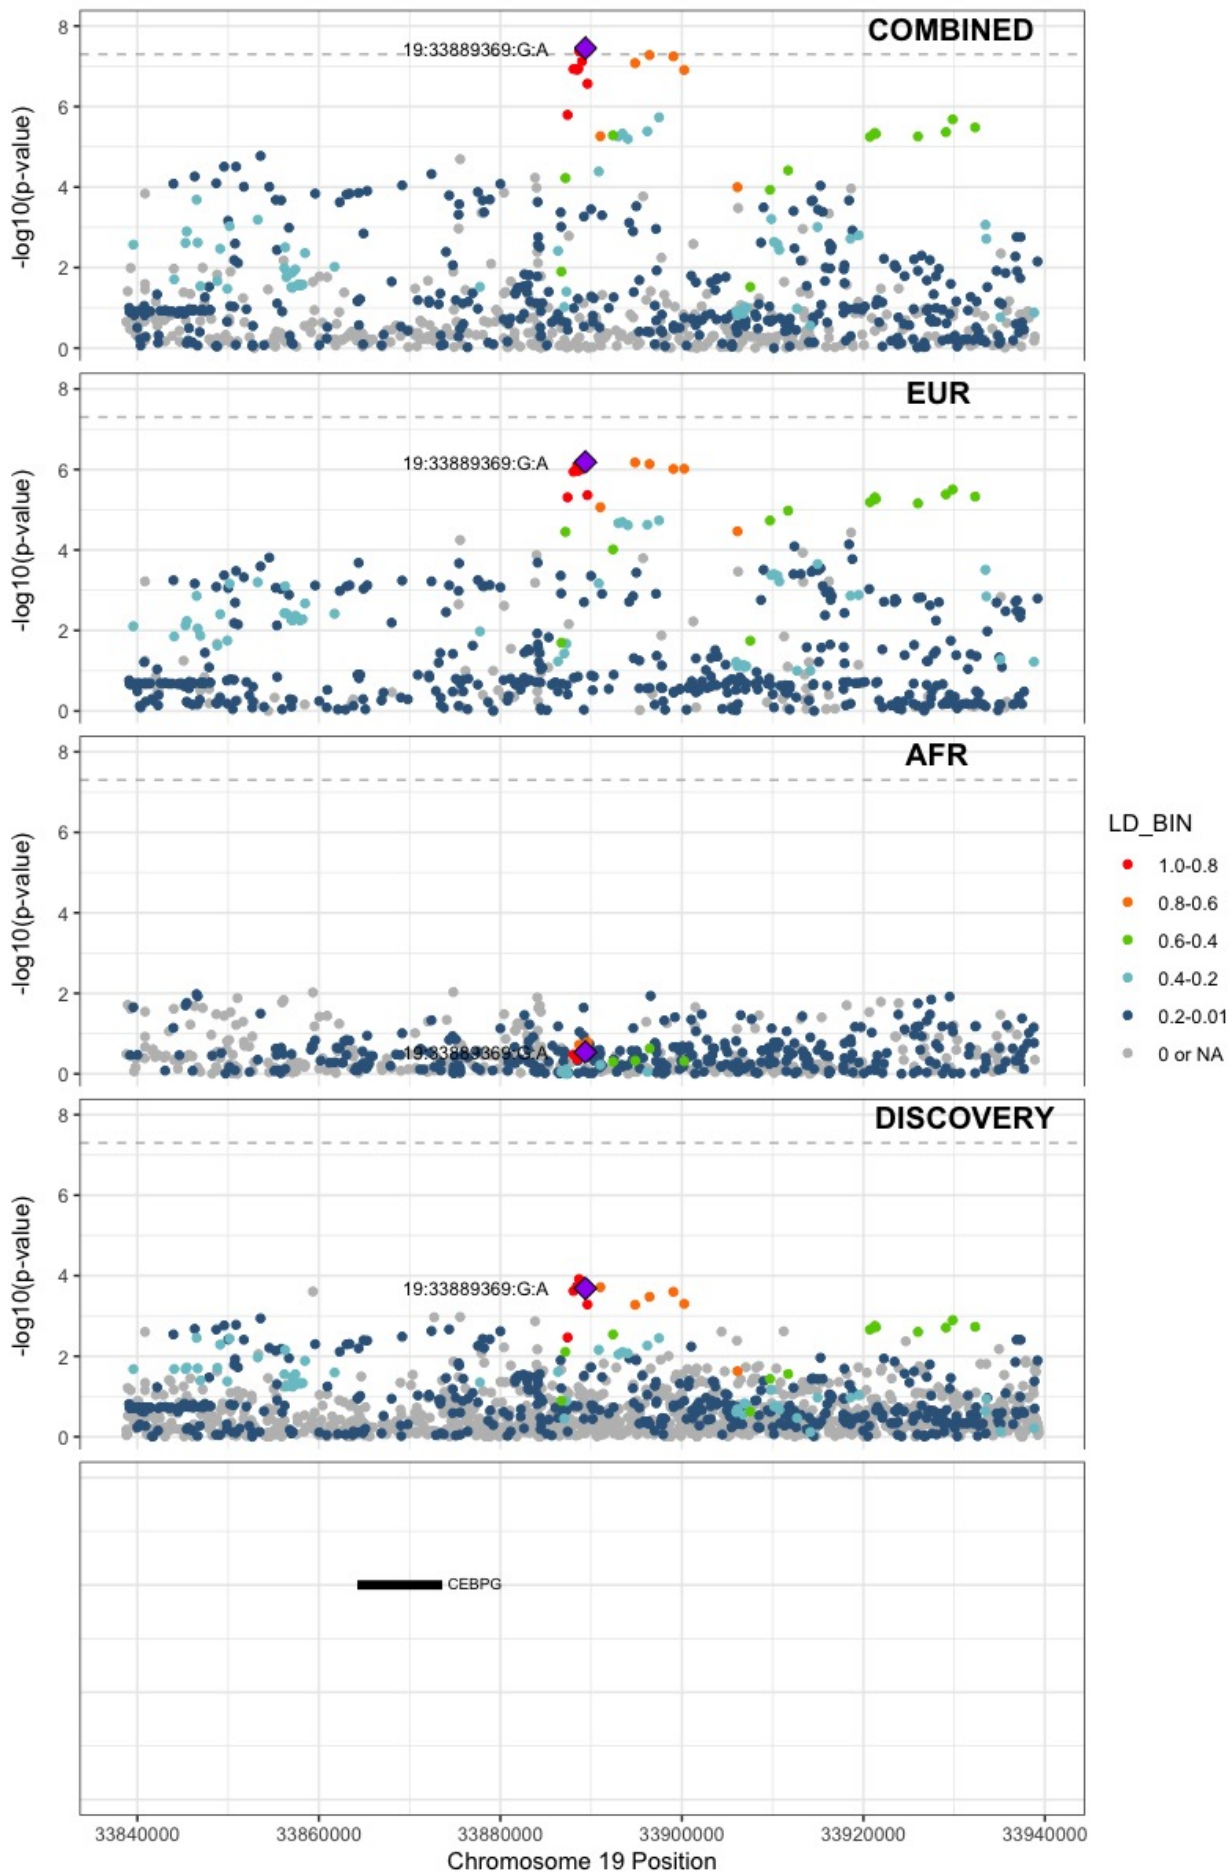

Supplementary Figure 6.98 – rs2545774 (chr19:41287674) in locus 121 (RAB4B)

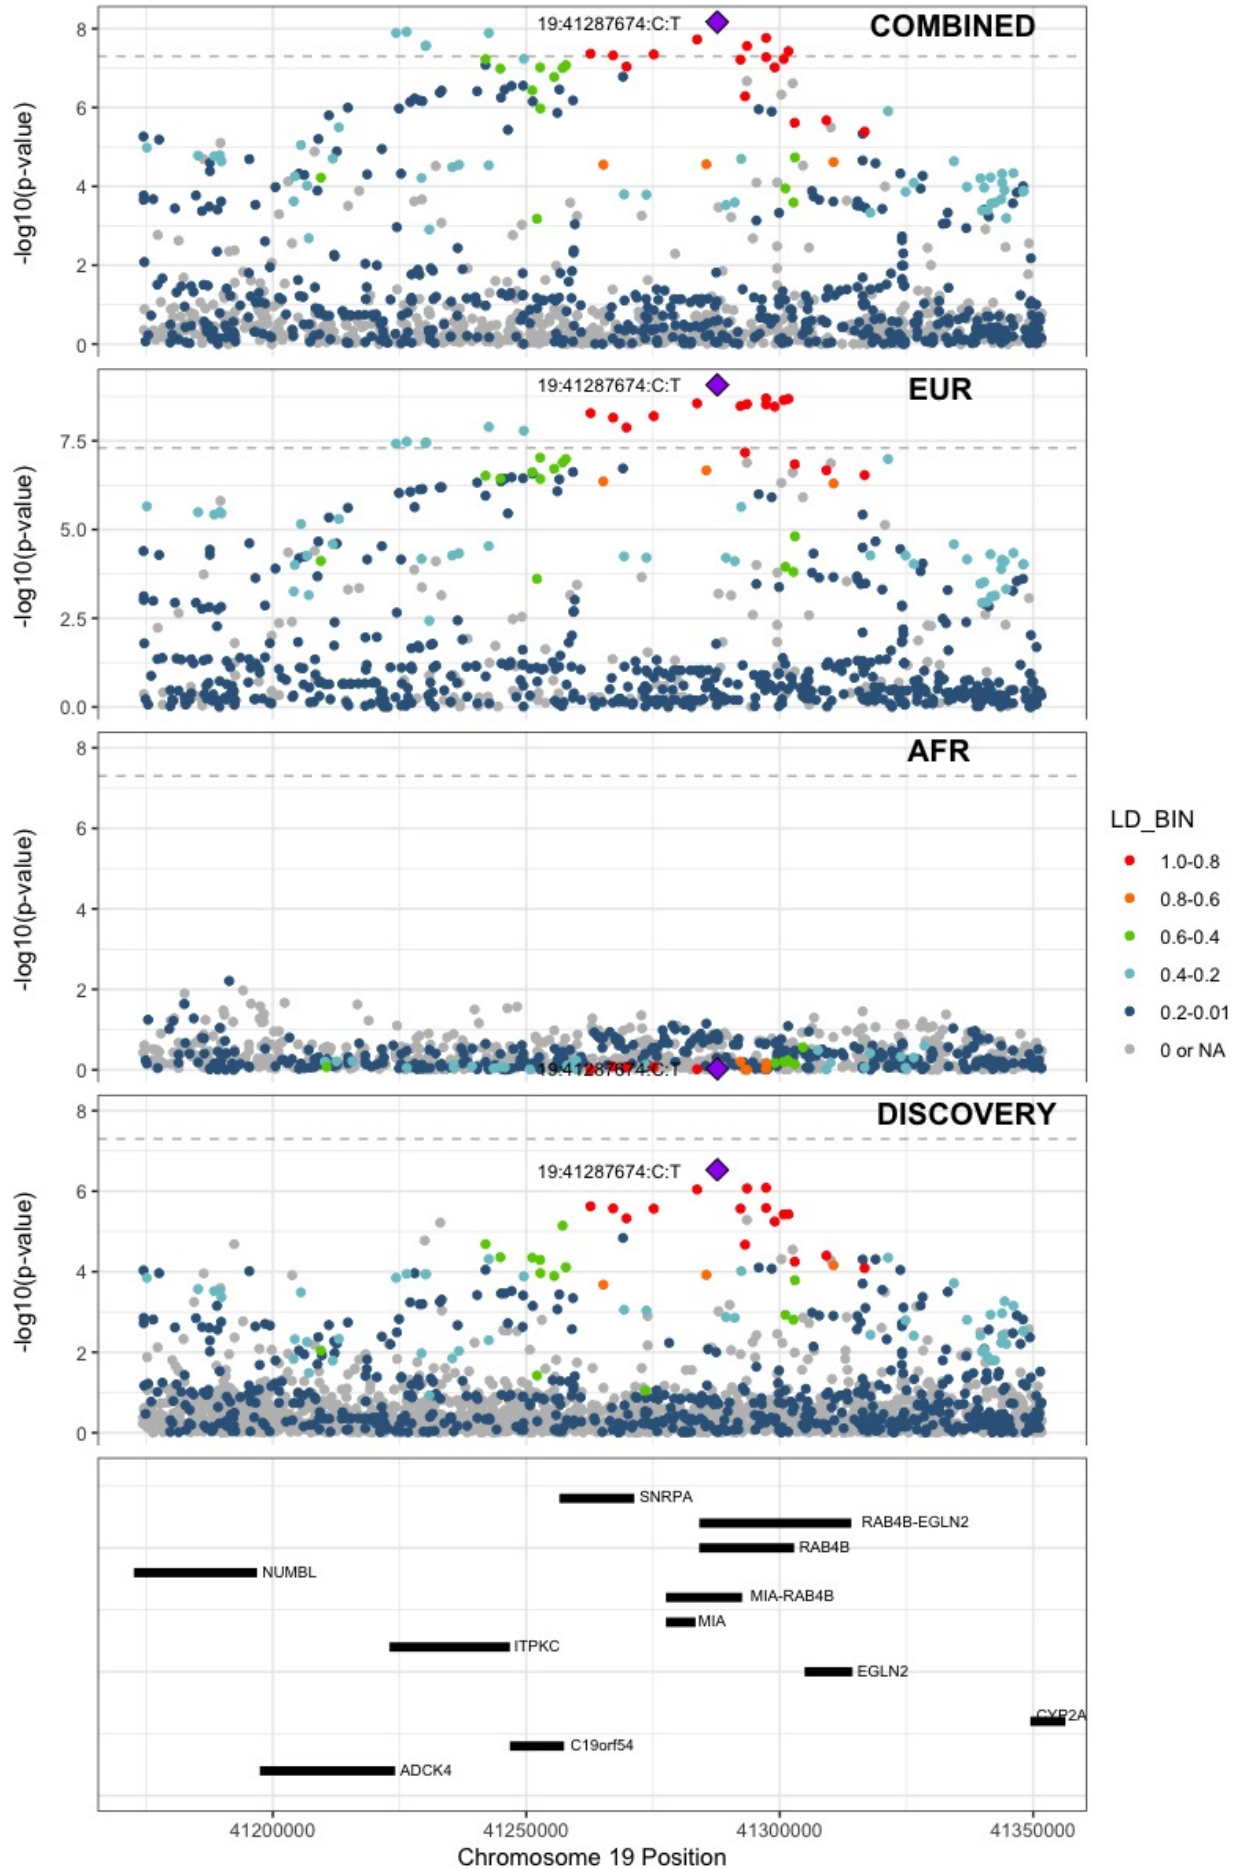

Supplementary Figure 6.99 – rs8108474 (chr19:46301479) in locus 122 (RSPH6A)

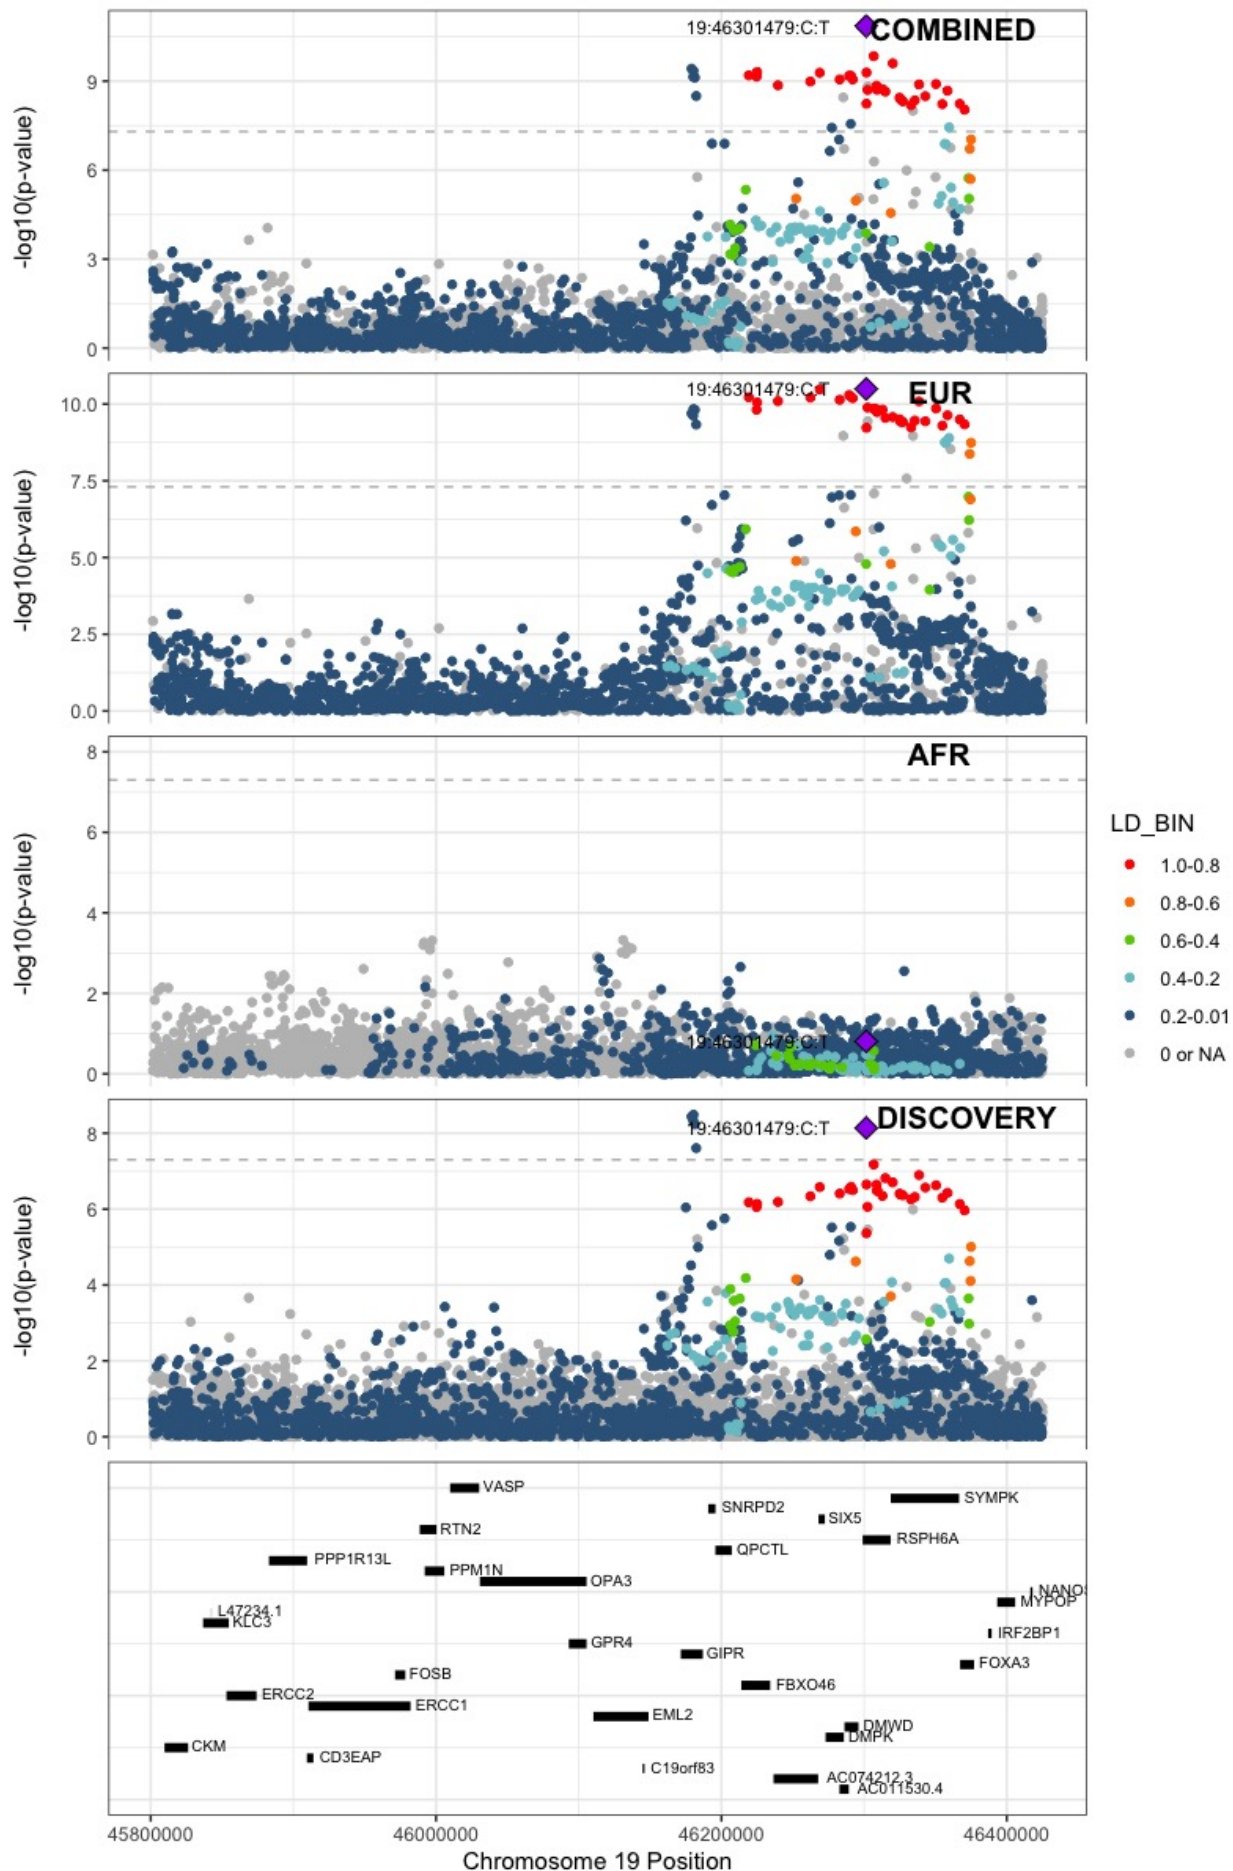

Supplementary Figure 6.100 – rs2638282 (chr19:49213833) in locus 123 (FUT2;MAMSTR)

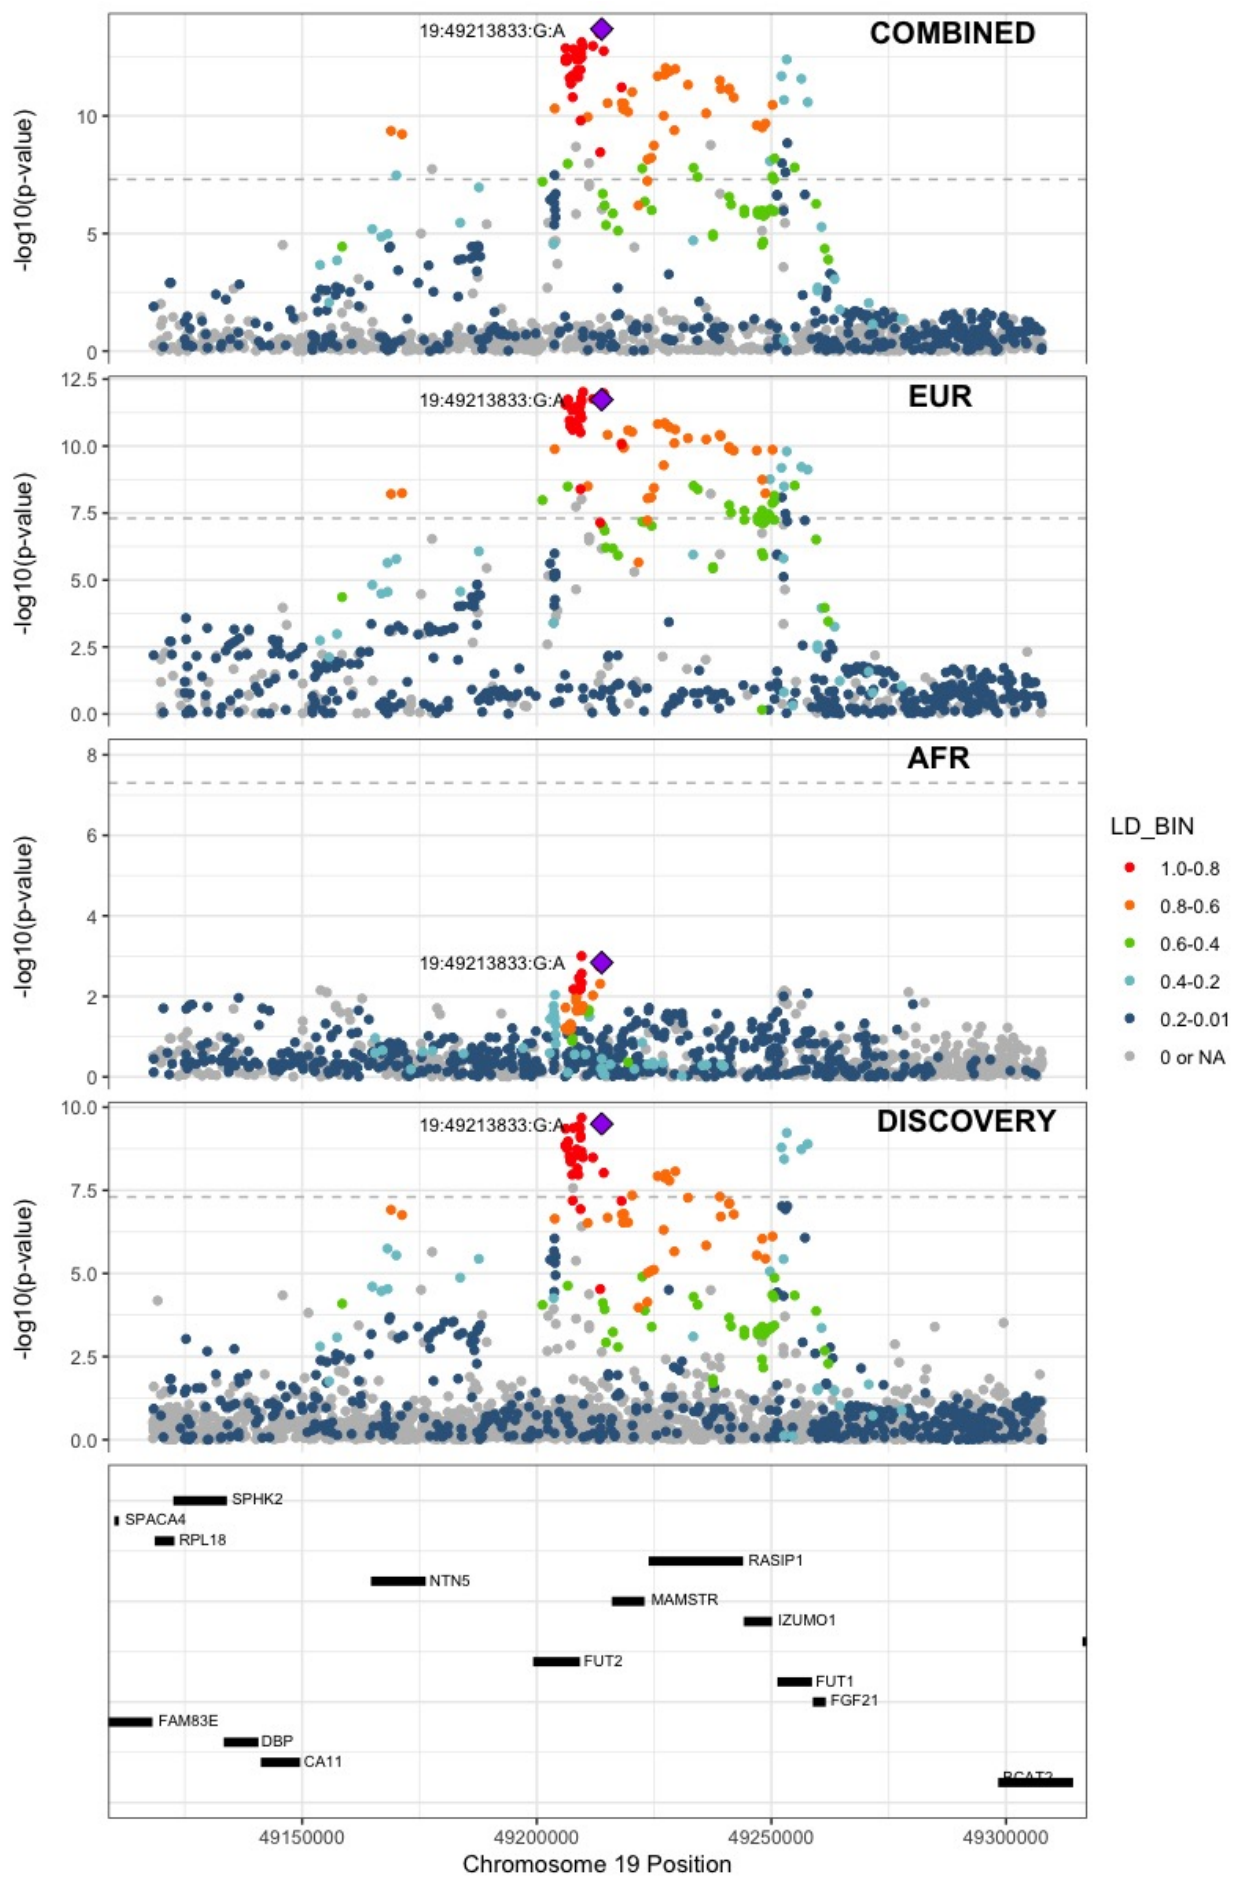

Supplementary Figure 6.101 – rs1654425 (chr19:55538980) in locus 124 (GP6)

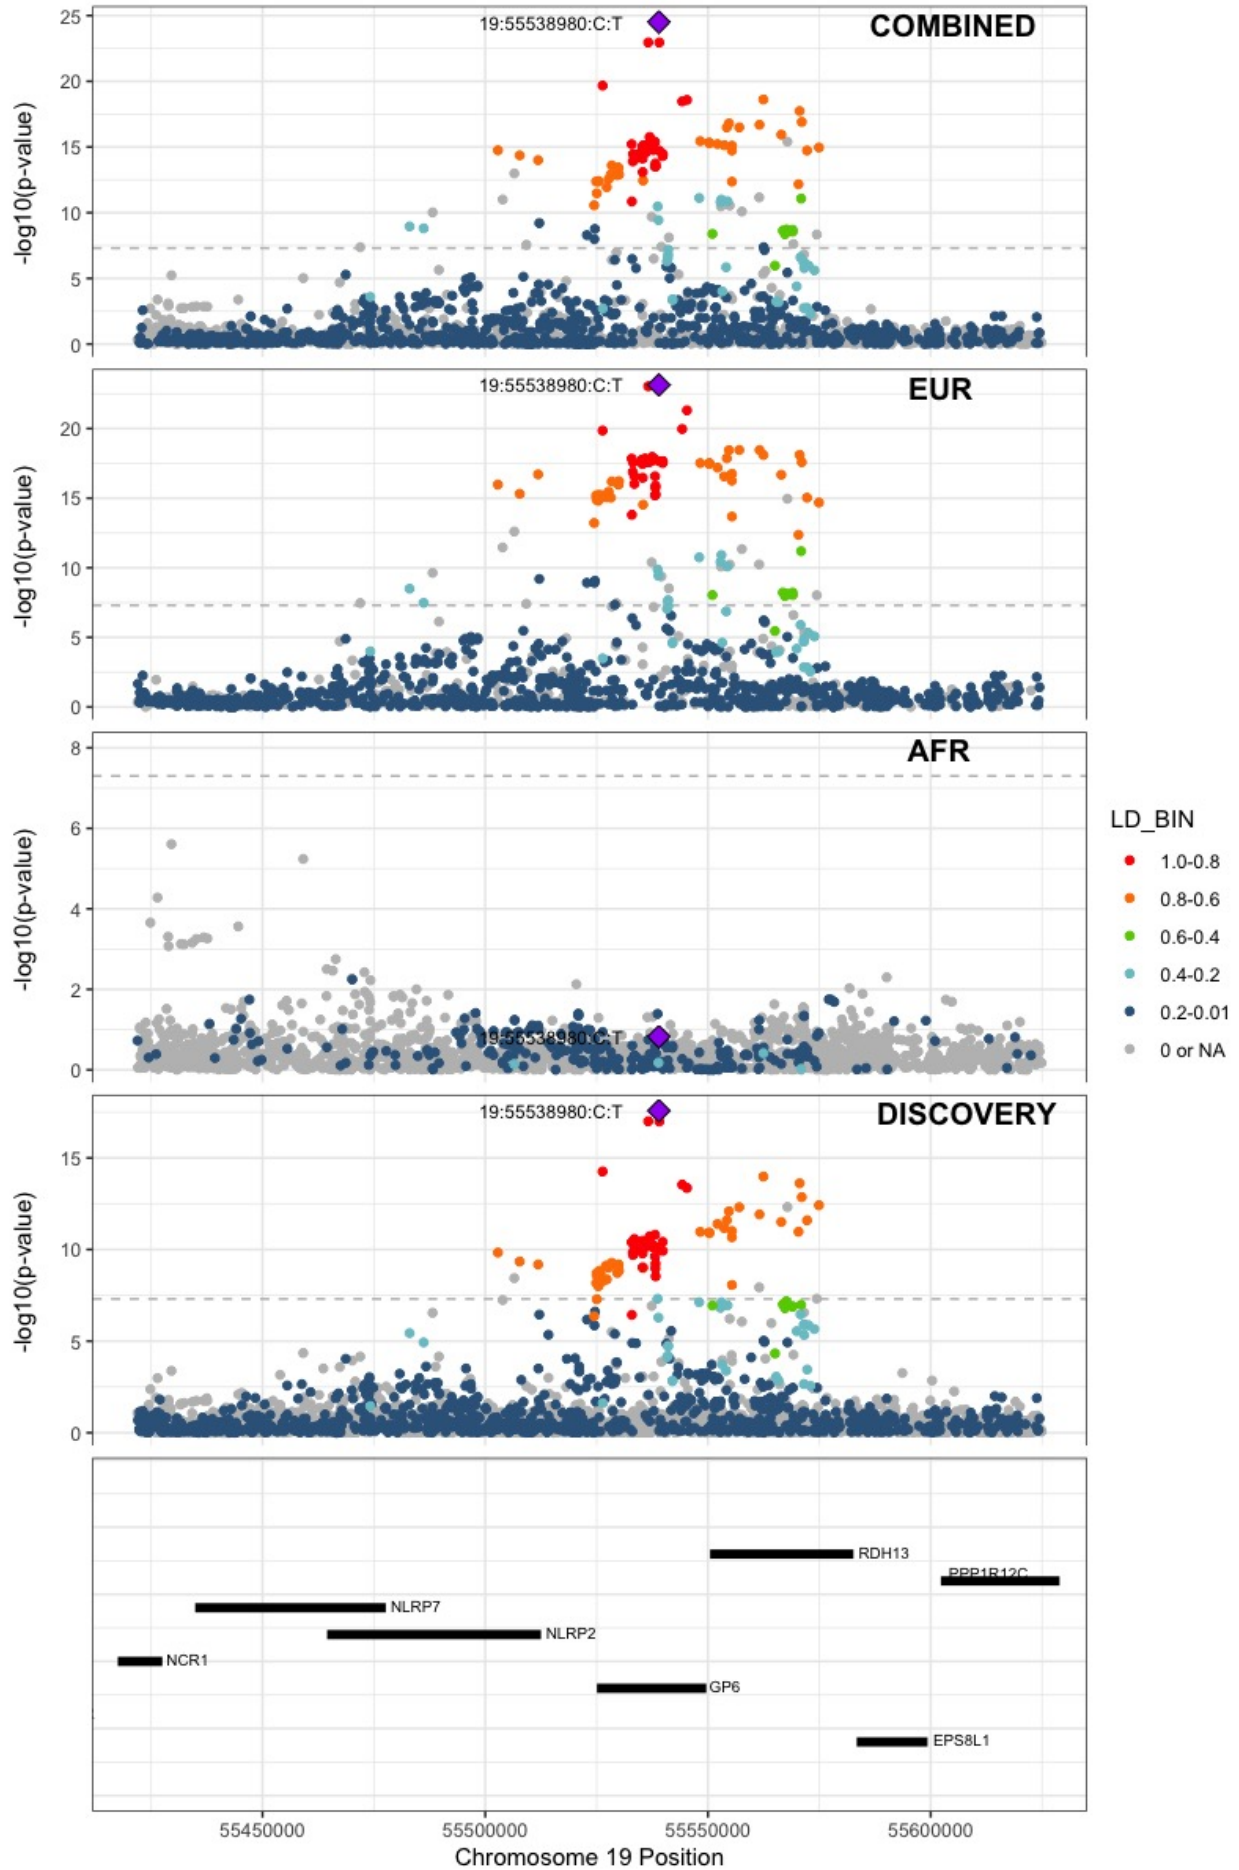



Supplementary Figure 6.102 – rs2631628 (chr19:56645250) in locus 125 (ZNF787;ZNF444)

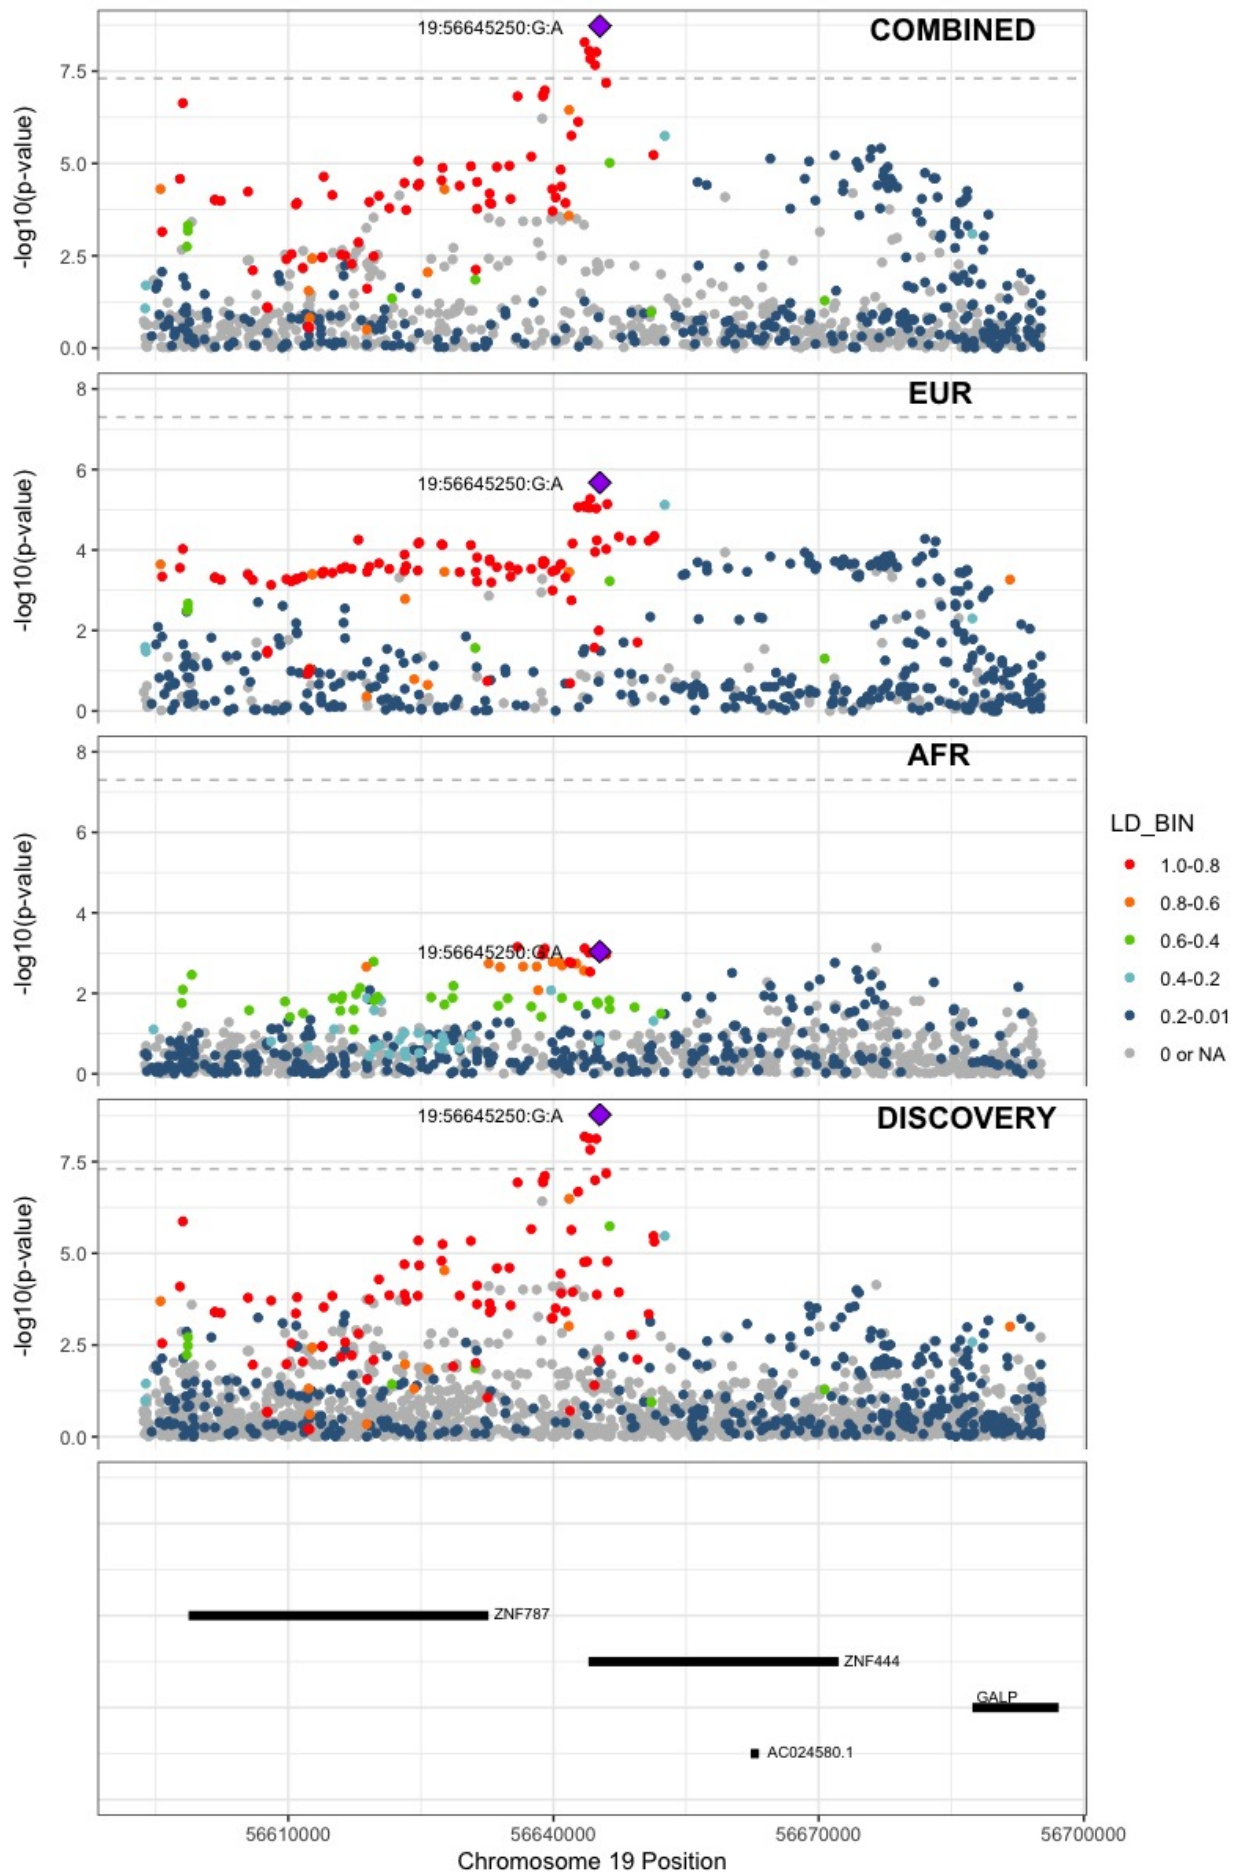

Supplementary Figure 6.103 – rs117390891 (chr20:23168526) in locus 126 (LINC00656;NXT1)

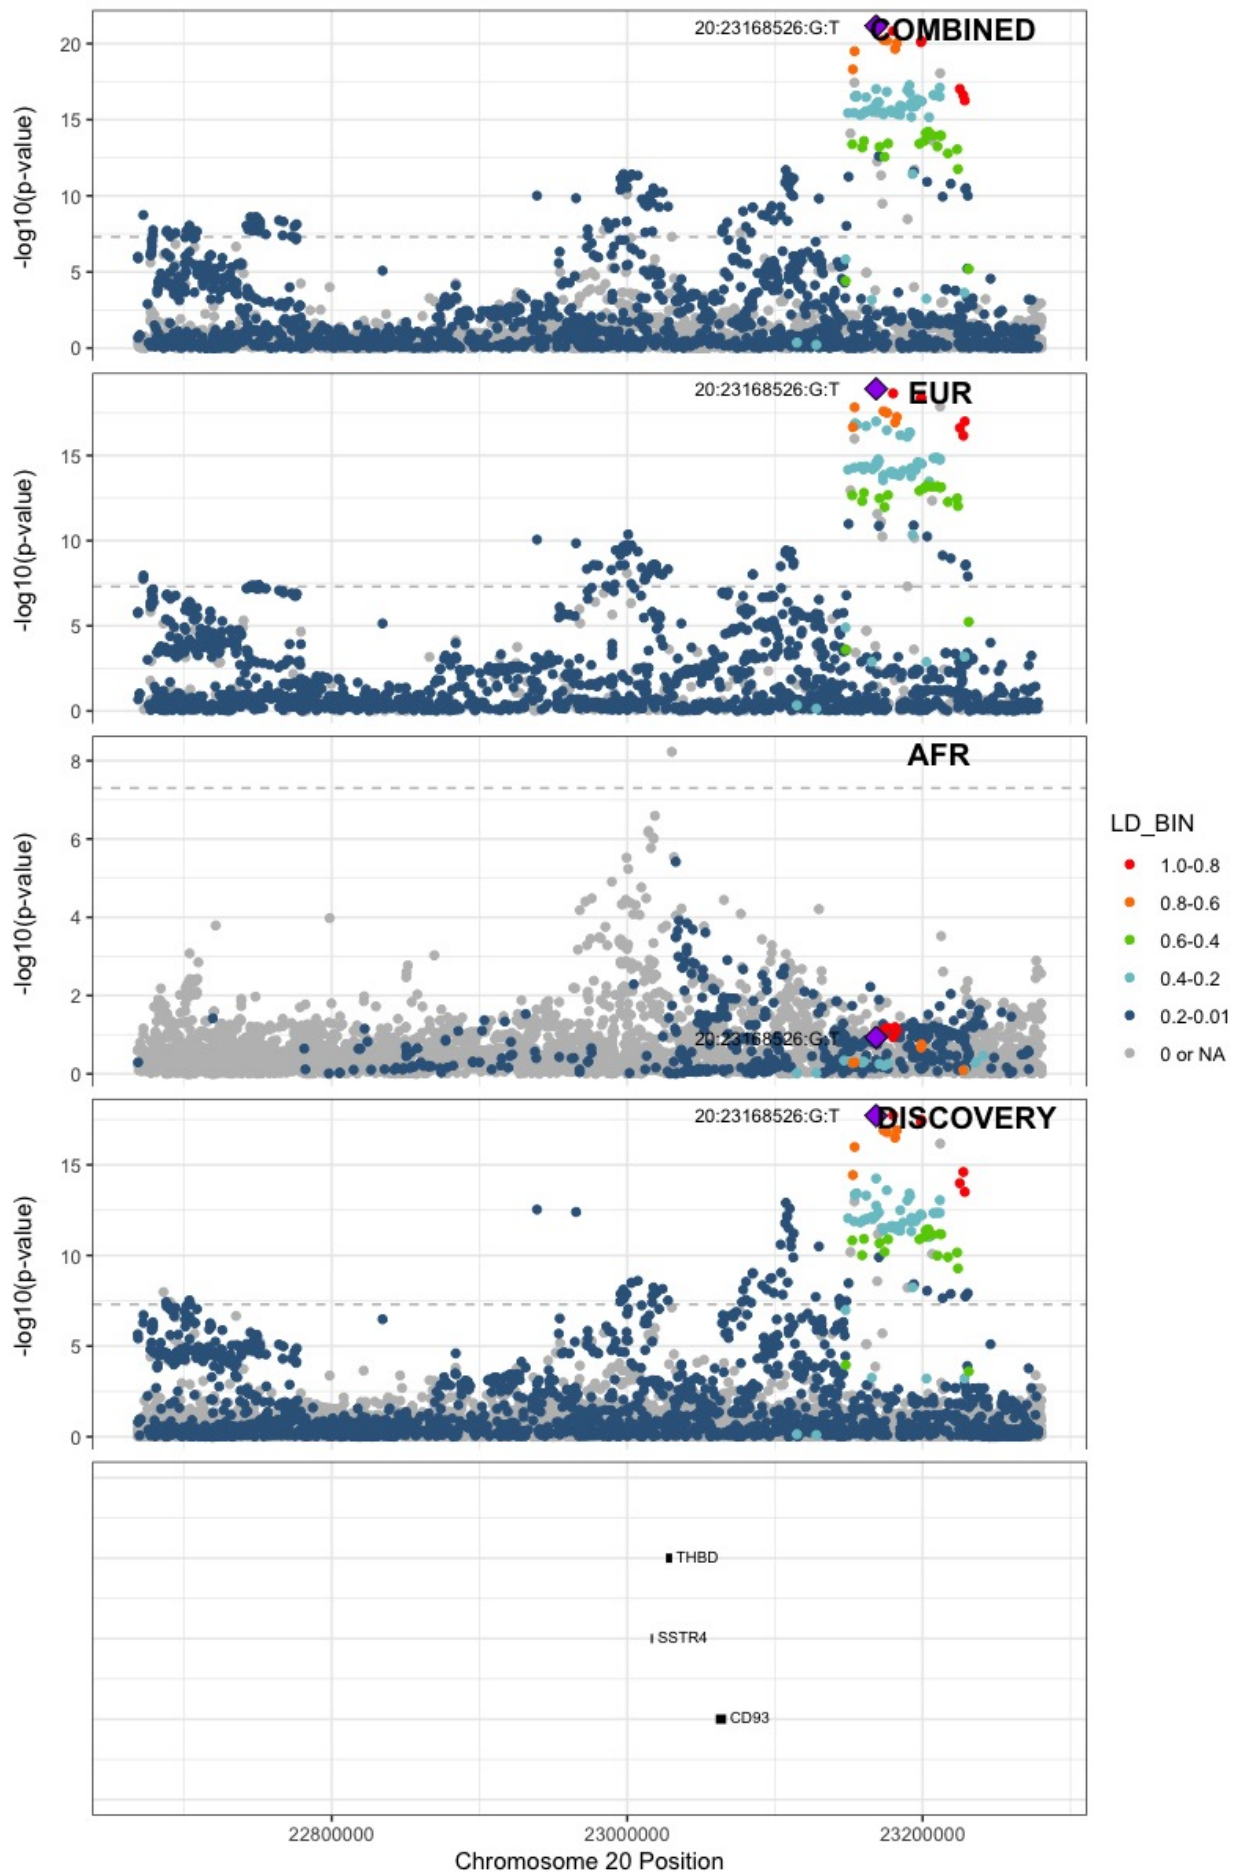

Supplementary Figure 6.104 – rs6060288 (chr20:33772243) in locus 127 (MMP24-AS1-EDEM2)

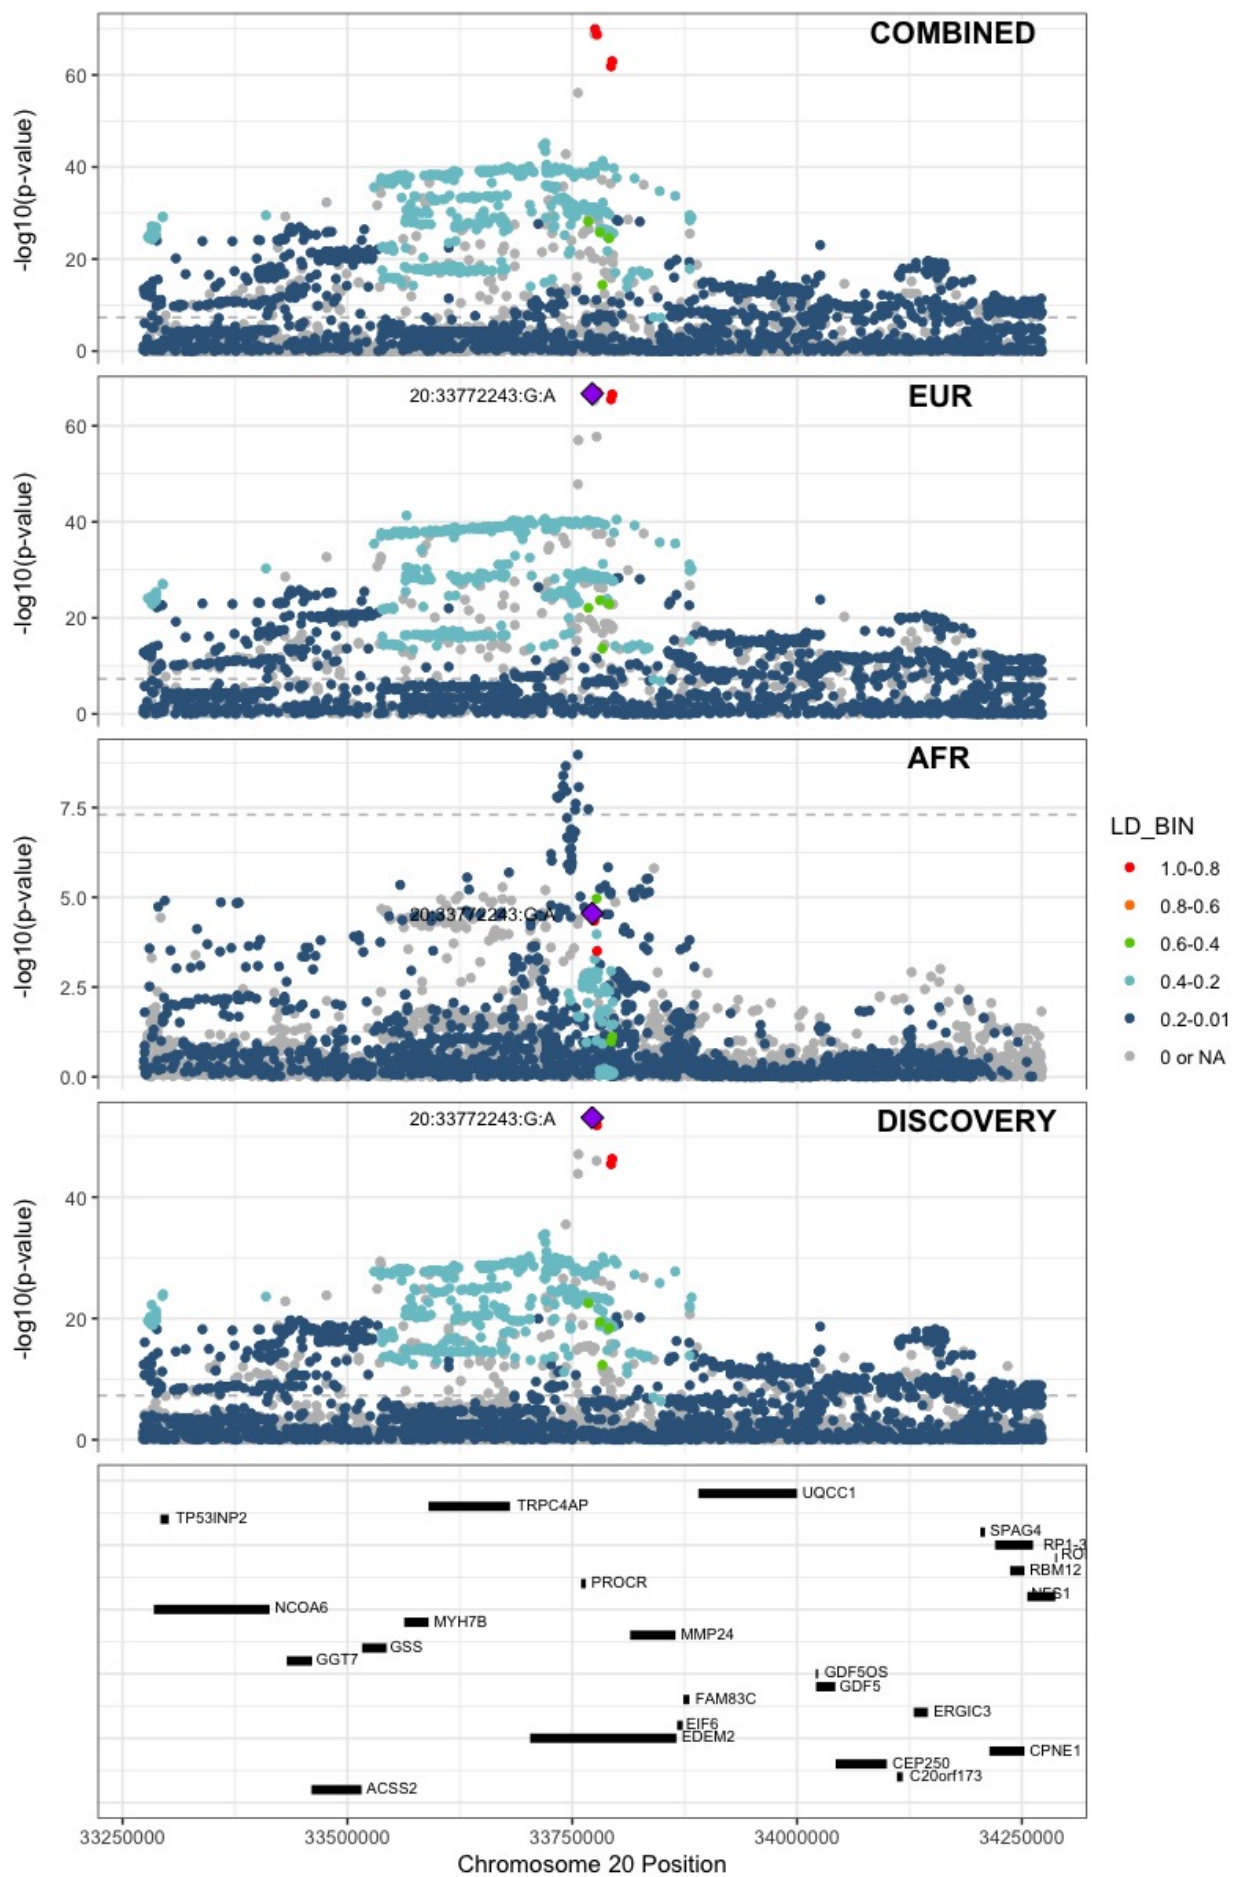

Supplementary Figure 6.105 – rs3070580 (chr22:33165231) in locus 129 (SYN3)

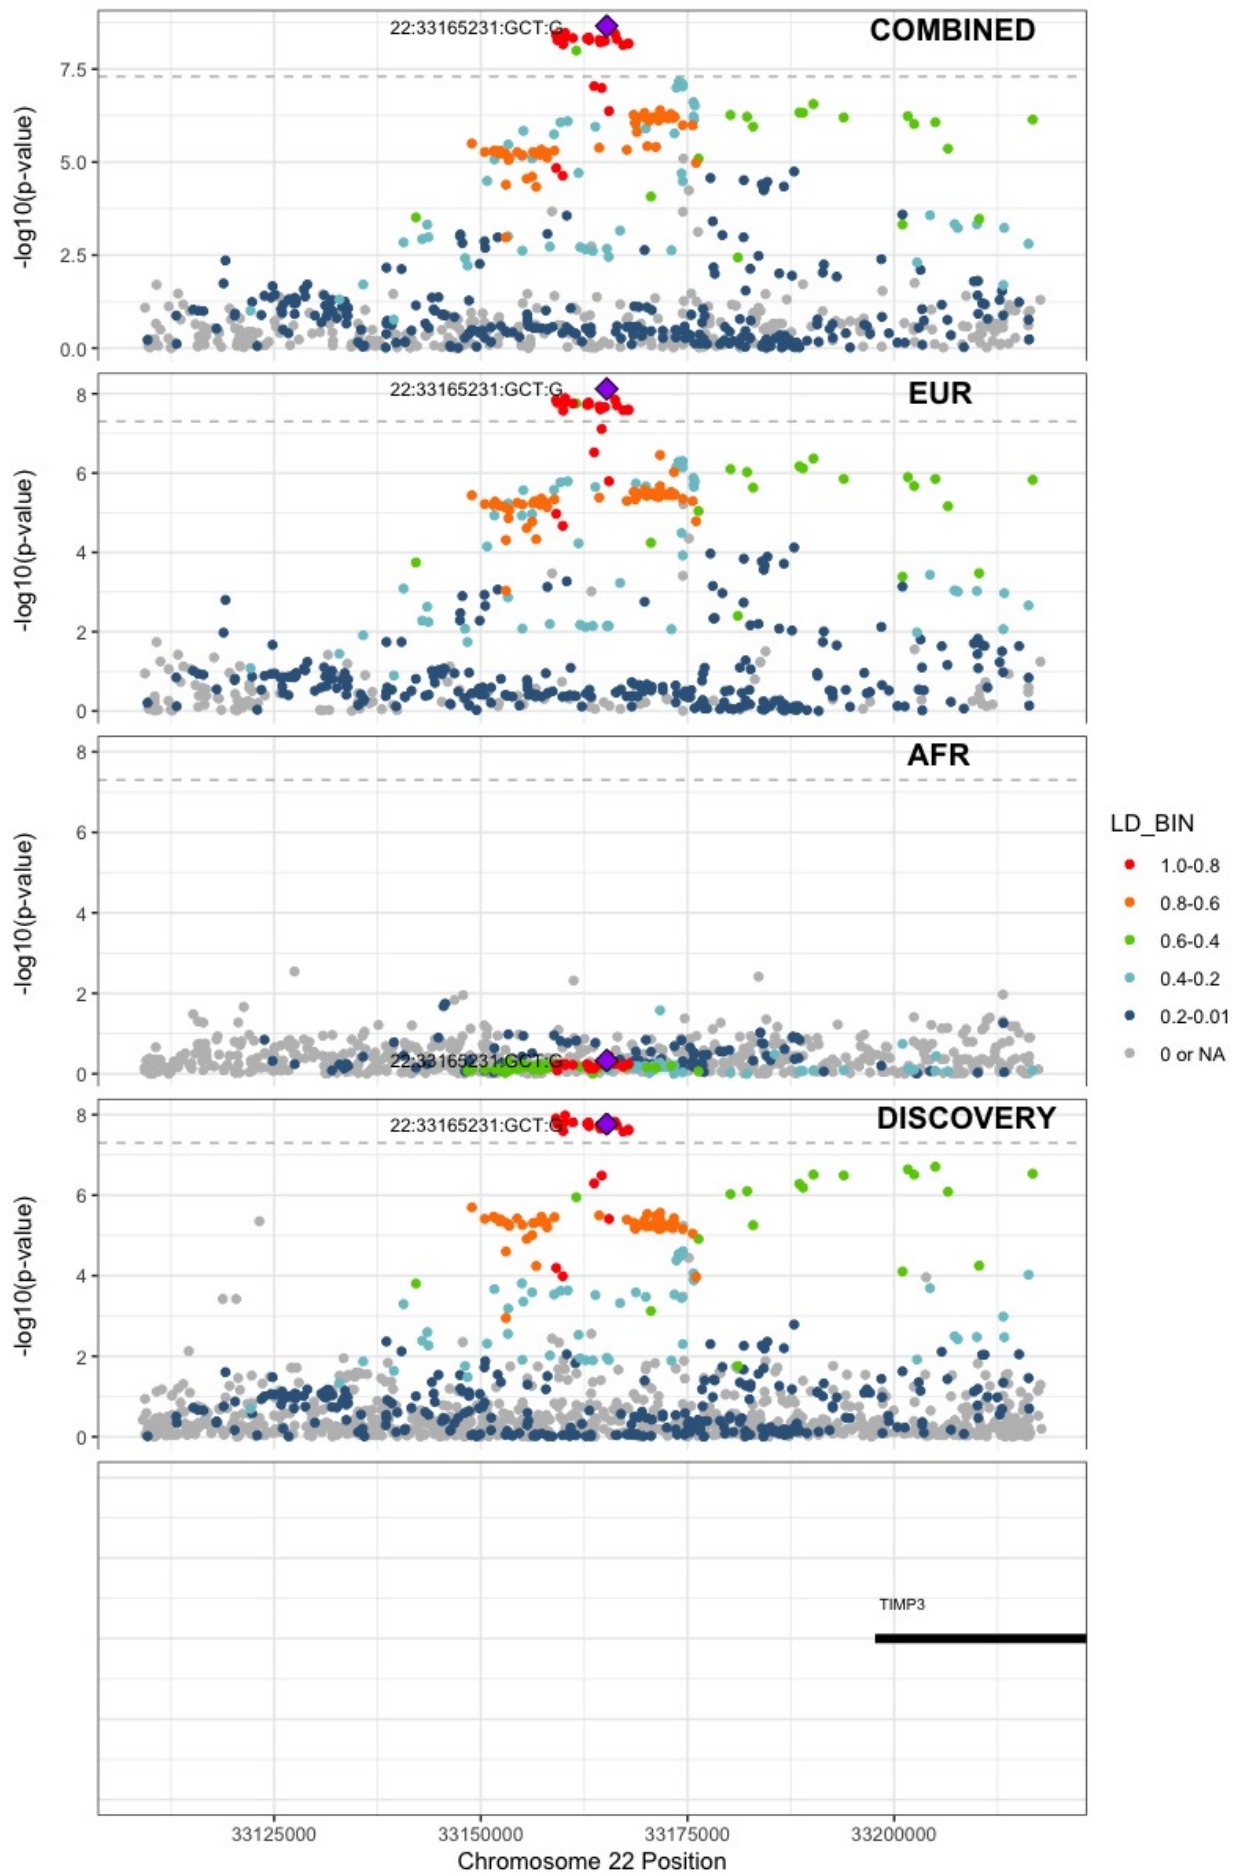

Supplementary Figure 6.106 – rs9611844 (chr22:43115776) in locus 130 (A4GALT)

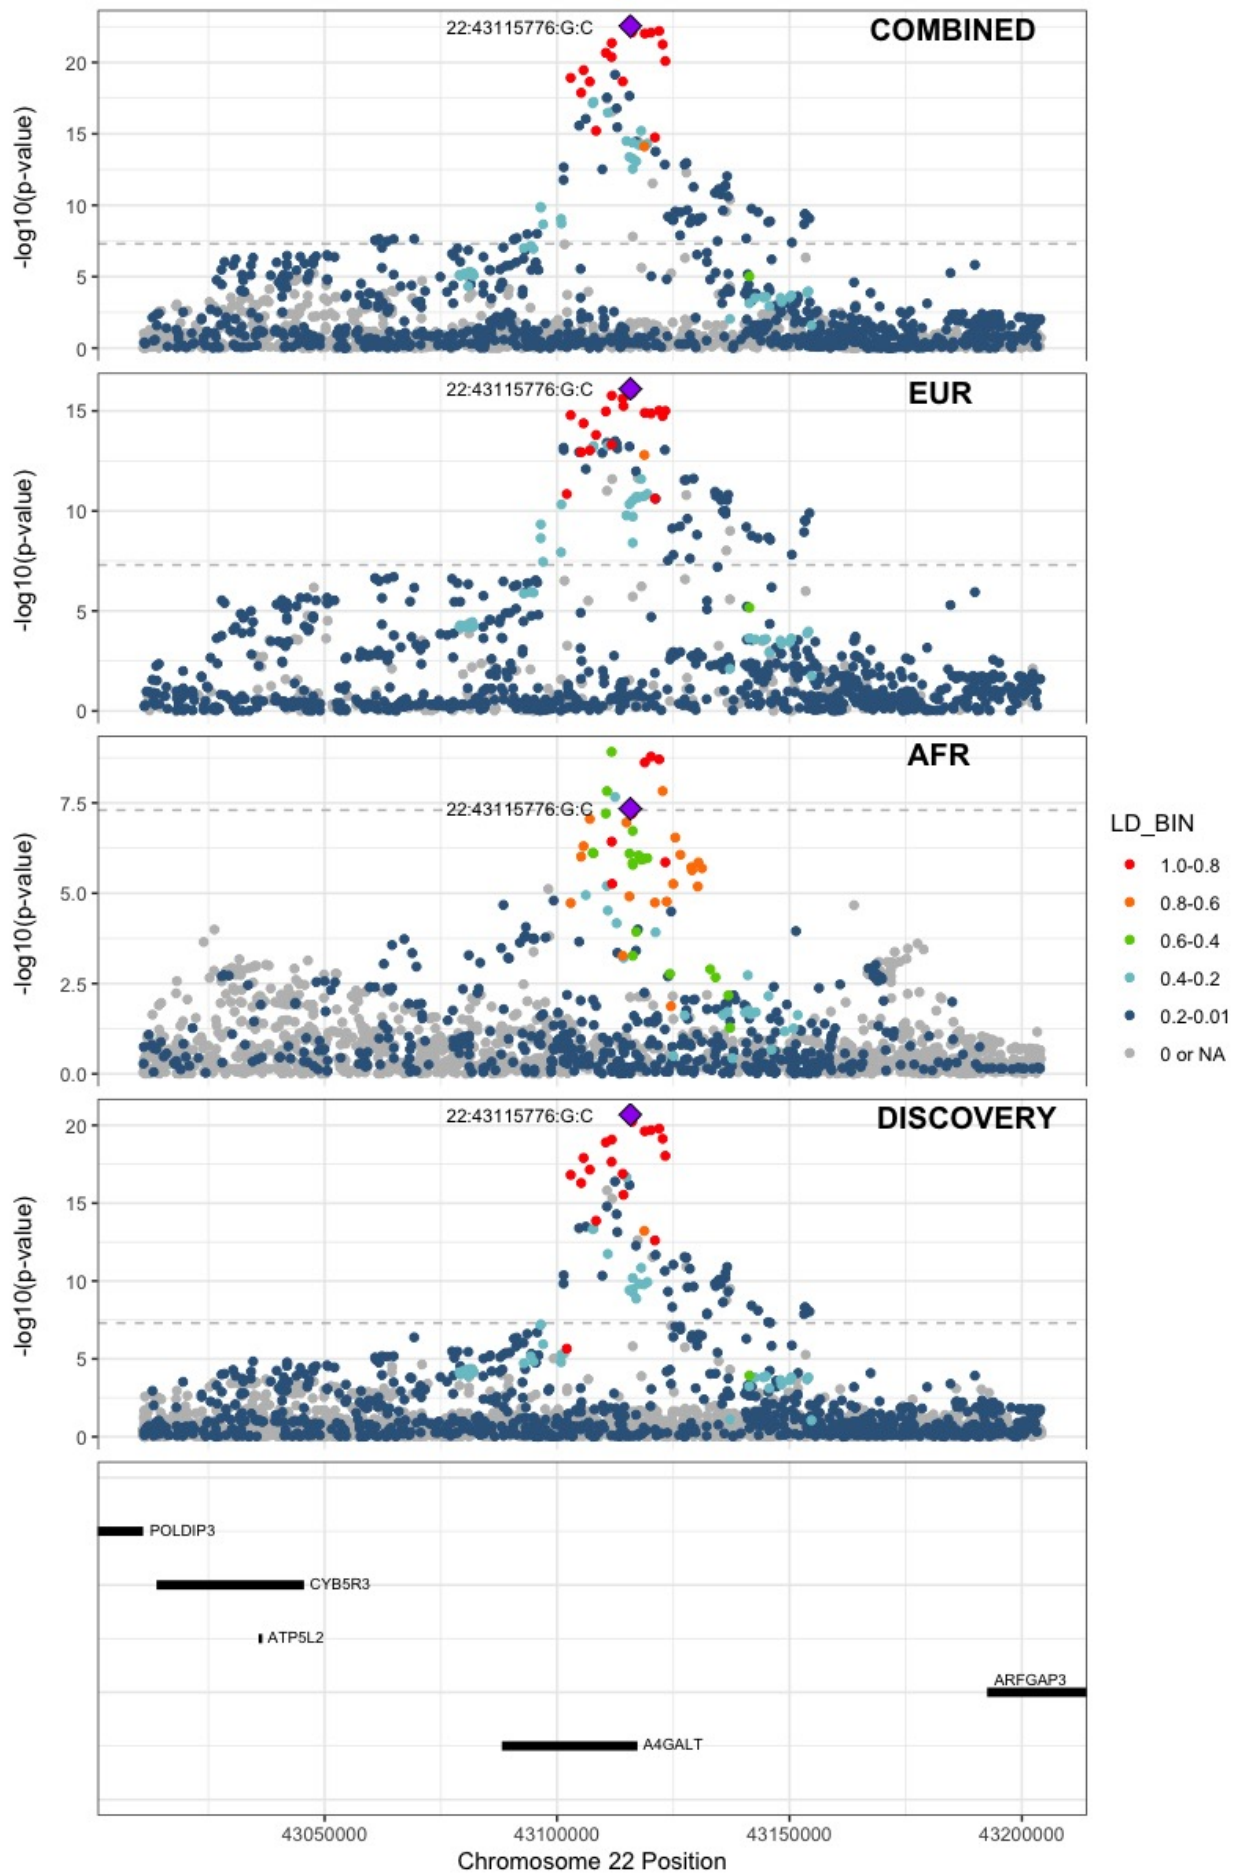

Supplementary Figure 6.107 – rs12388118 (chr23:11380742) in locus 131 (ARHGAP6)

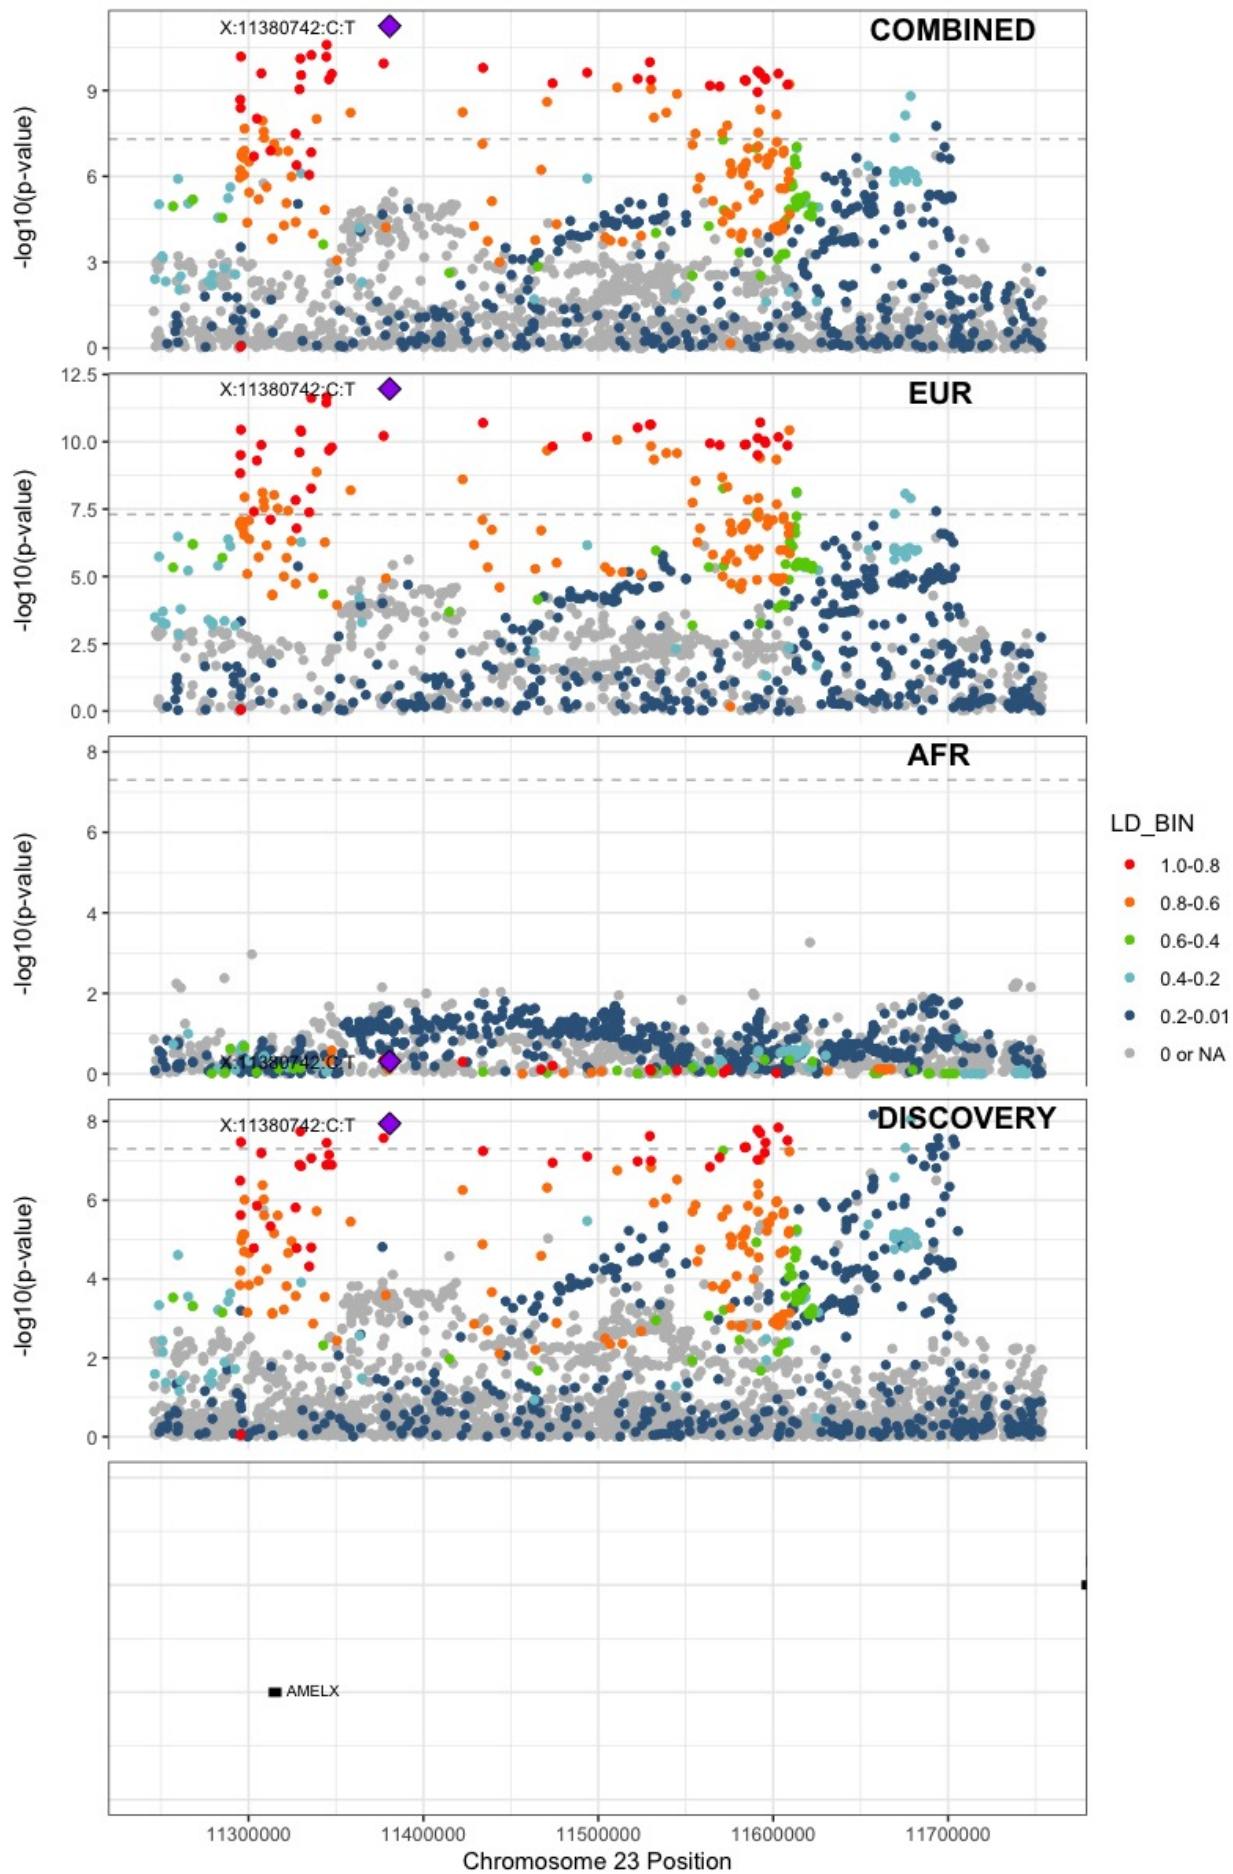

Supplementary Figure 6.108 – rs6632109 (chr23:34894638) in locus 132 (TMEM47;FAM47B)

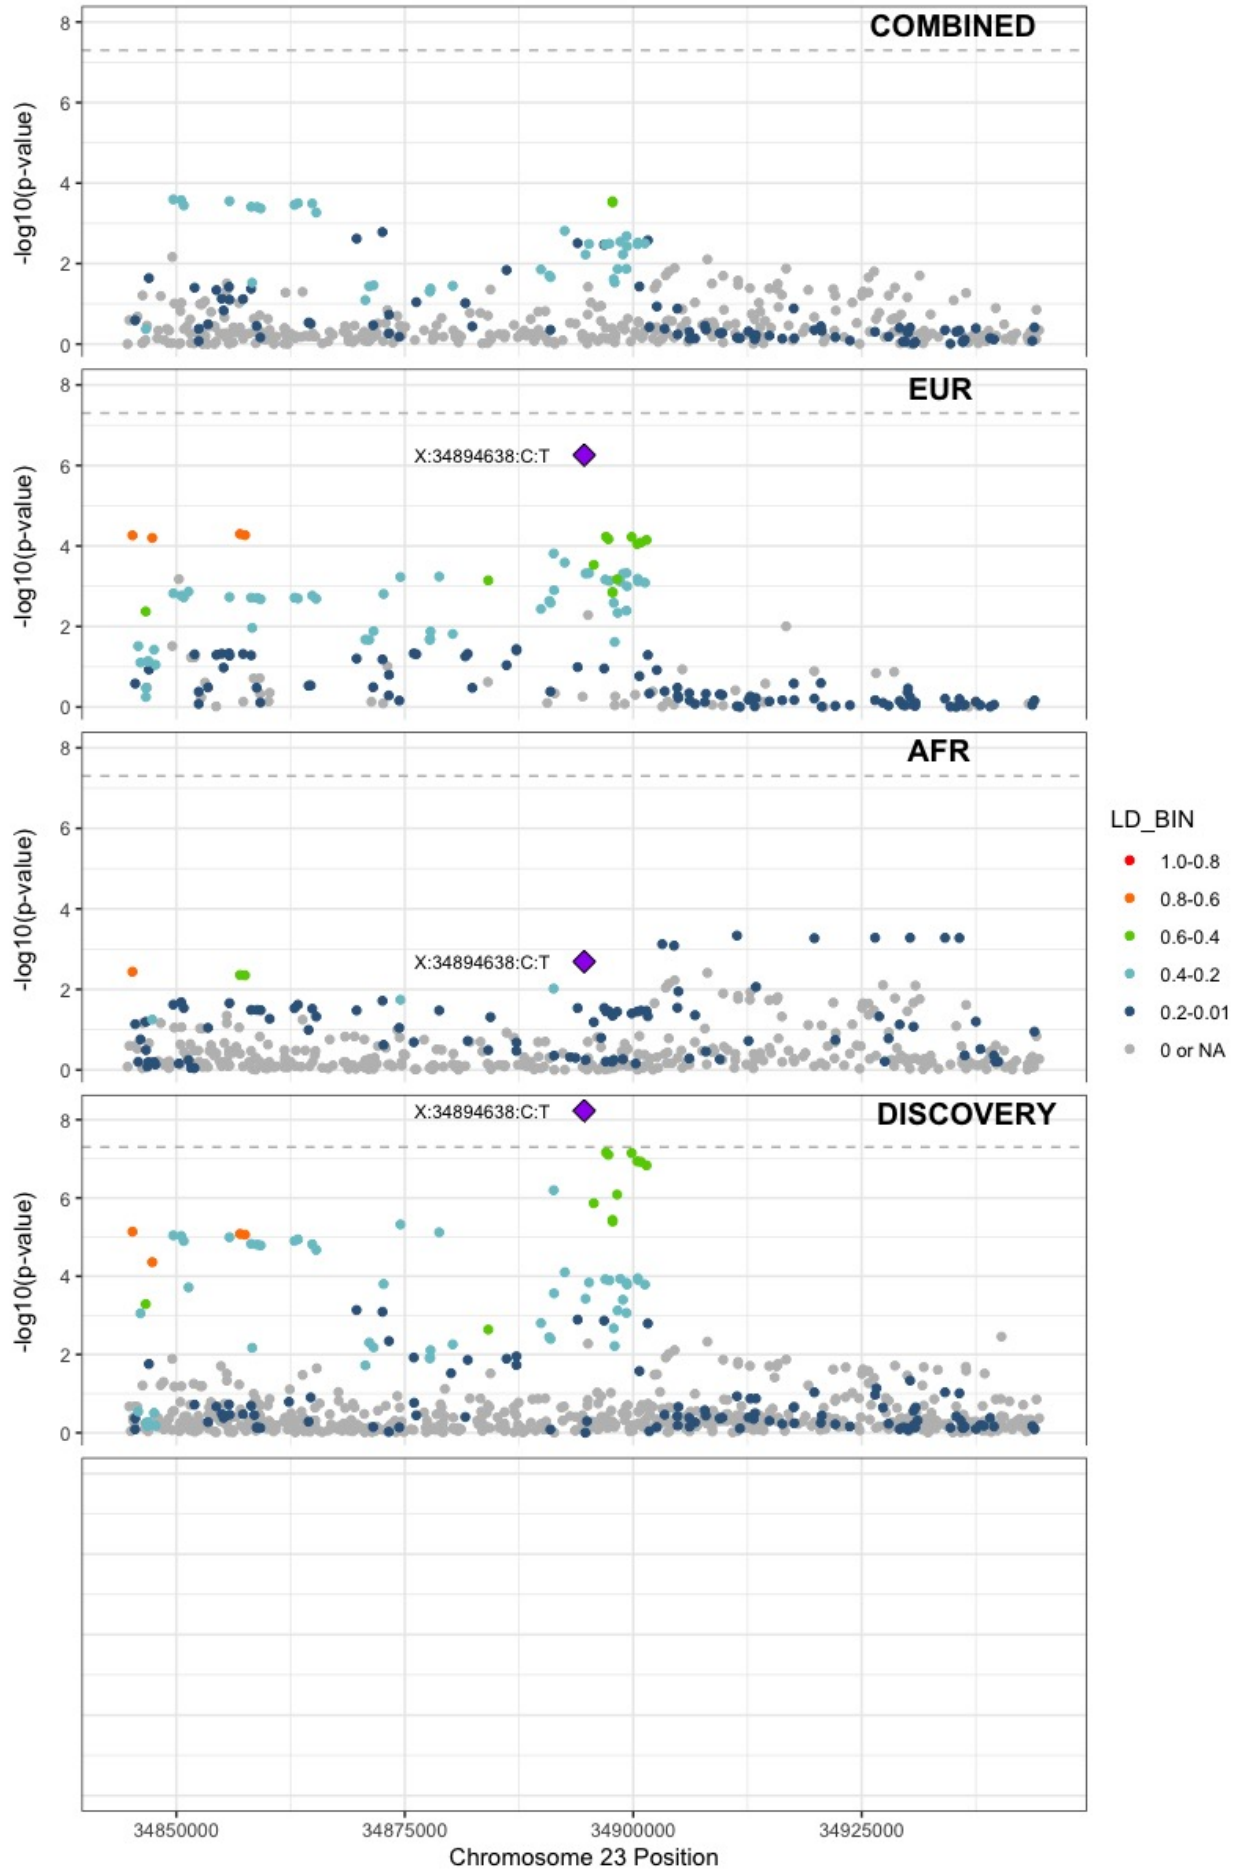

Supplementary Figure 6.109 – rs3002416 (chr23:39710195) in locus 133 (MIR1587;BCOR)

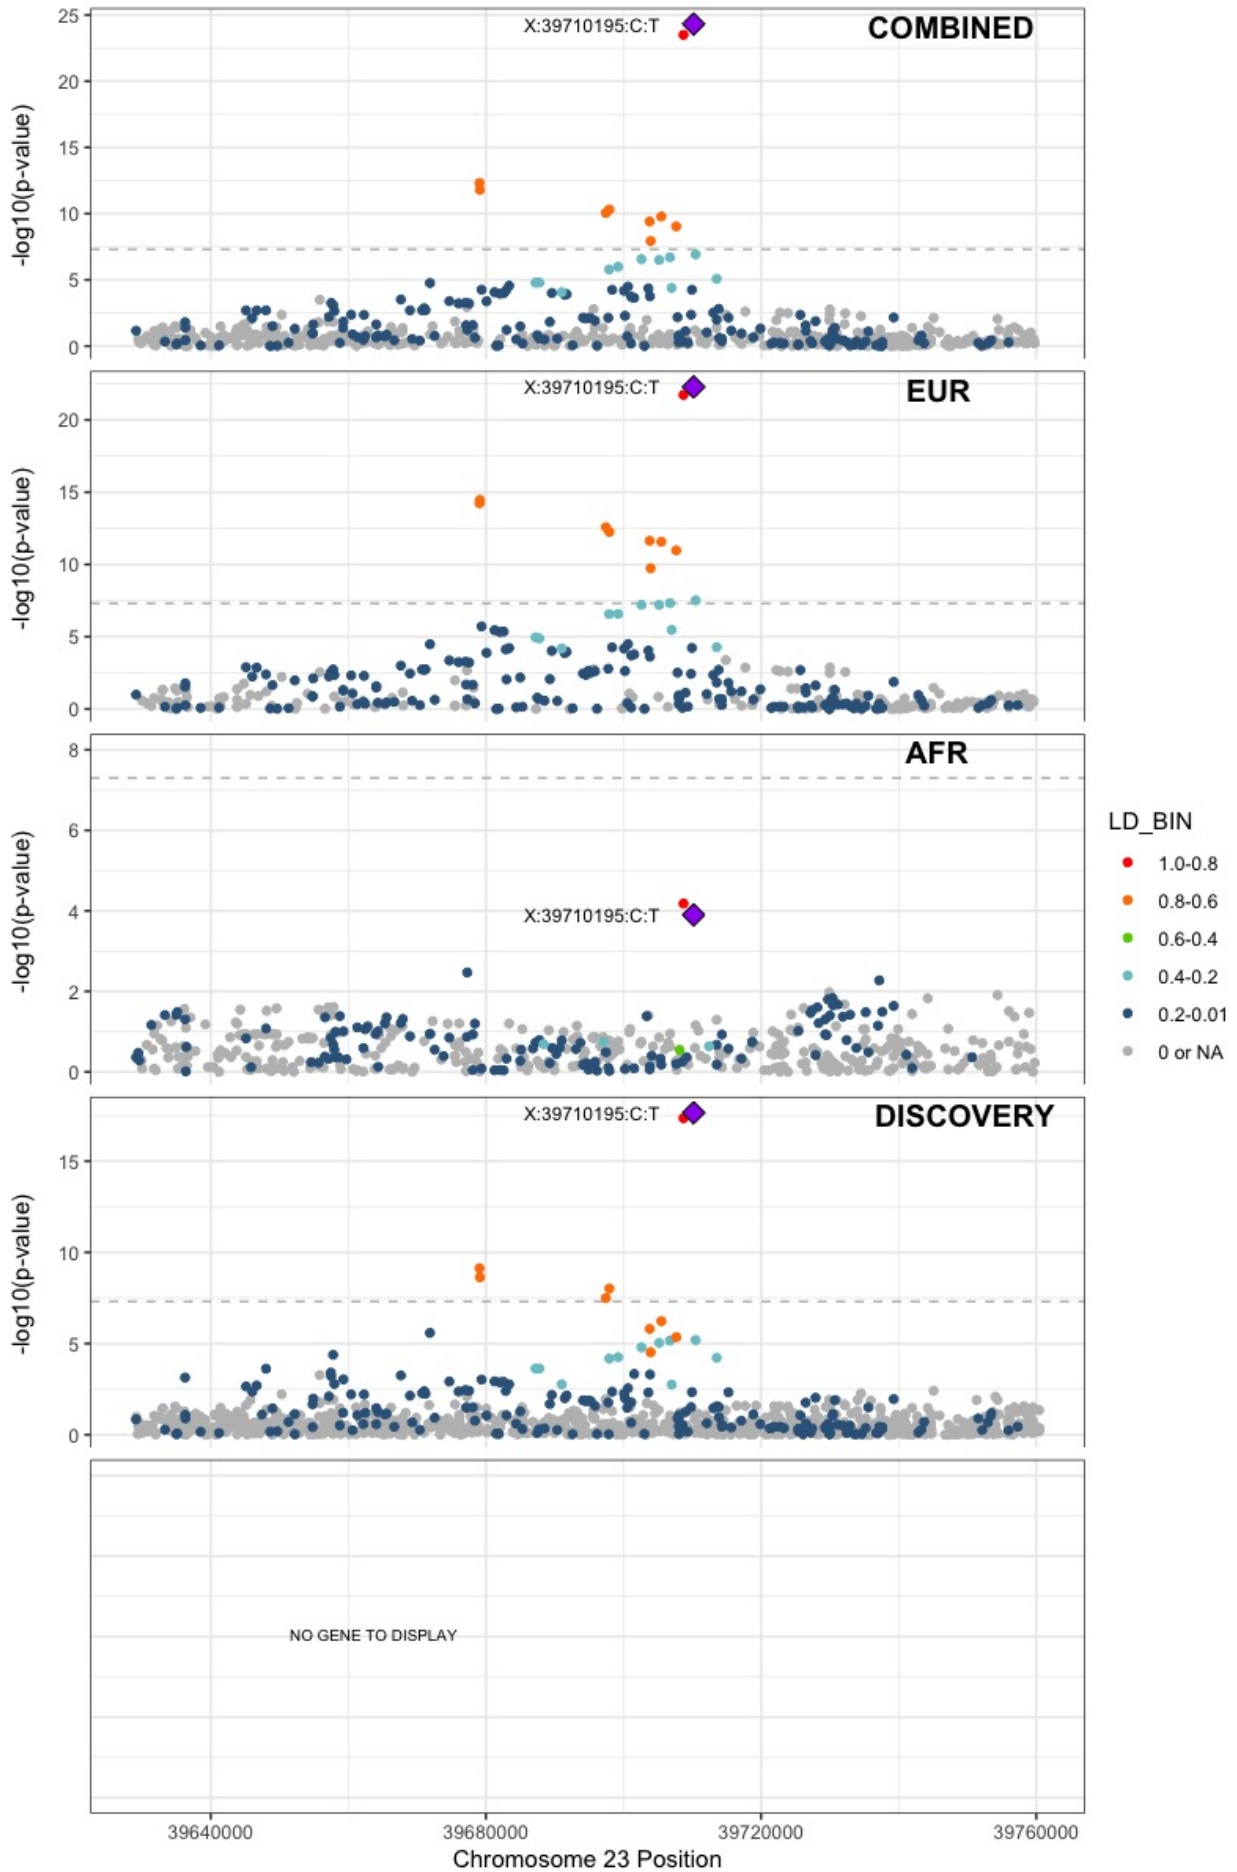



Supplementary Figure 6.110 – rs6048 (chr23:138633280) in locus 134 (F9)

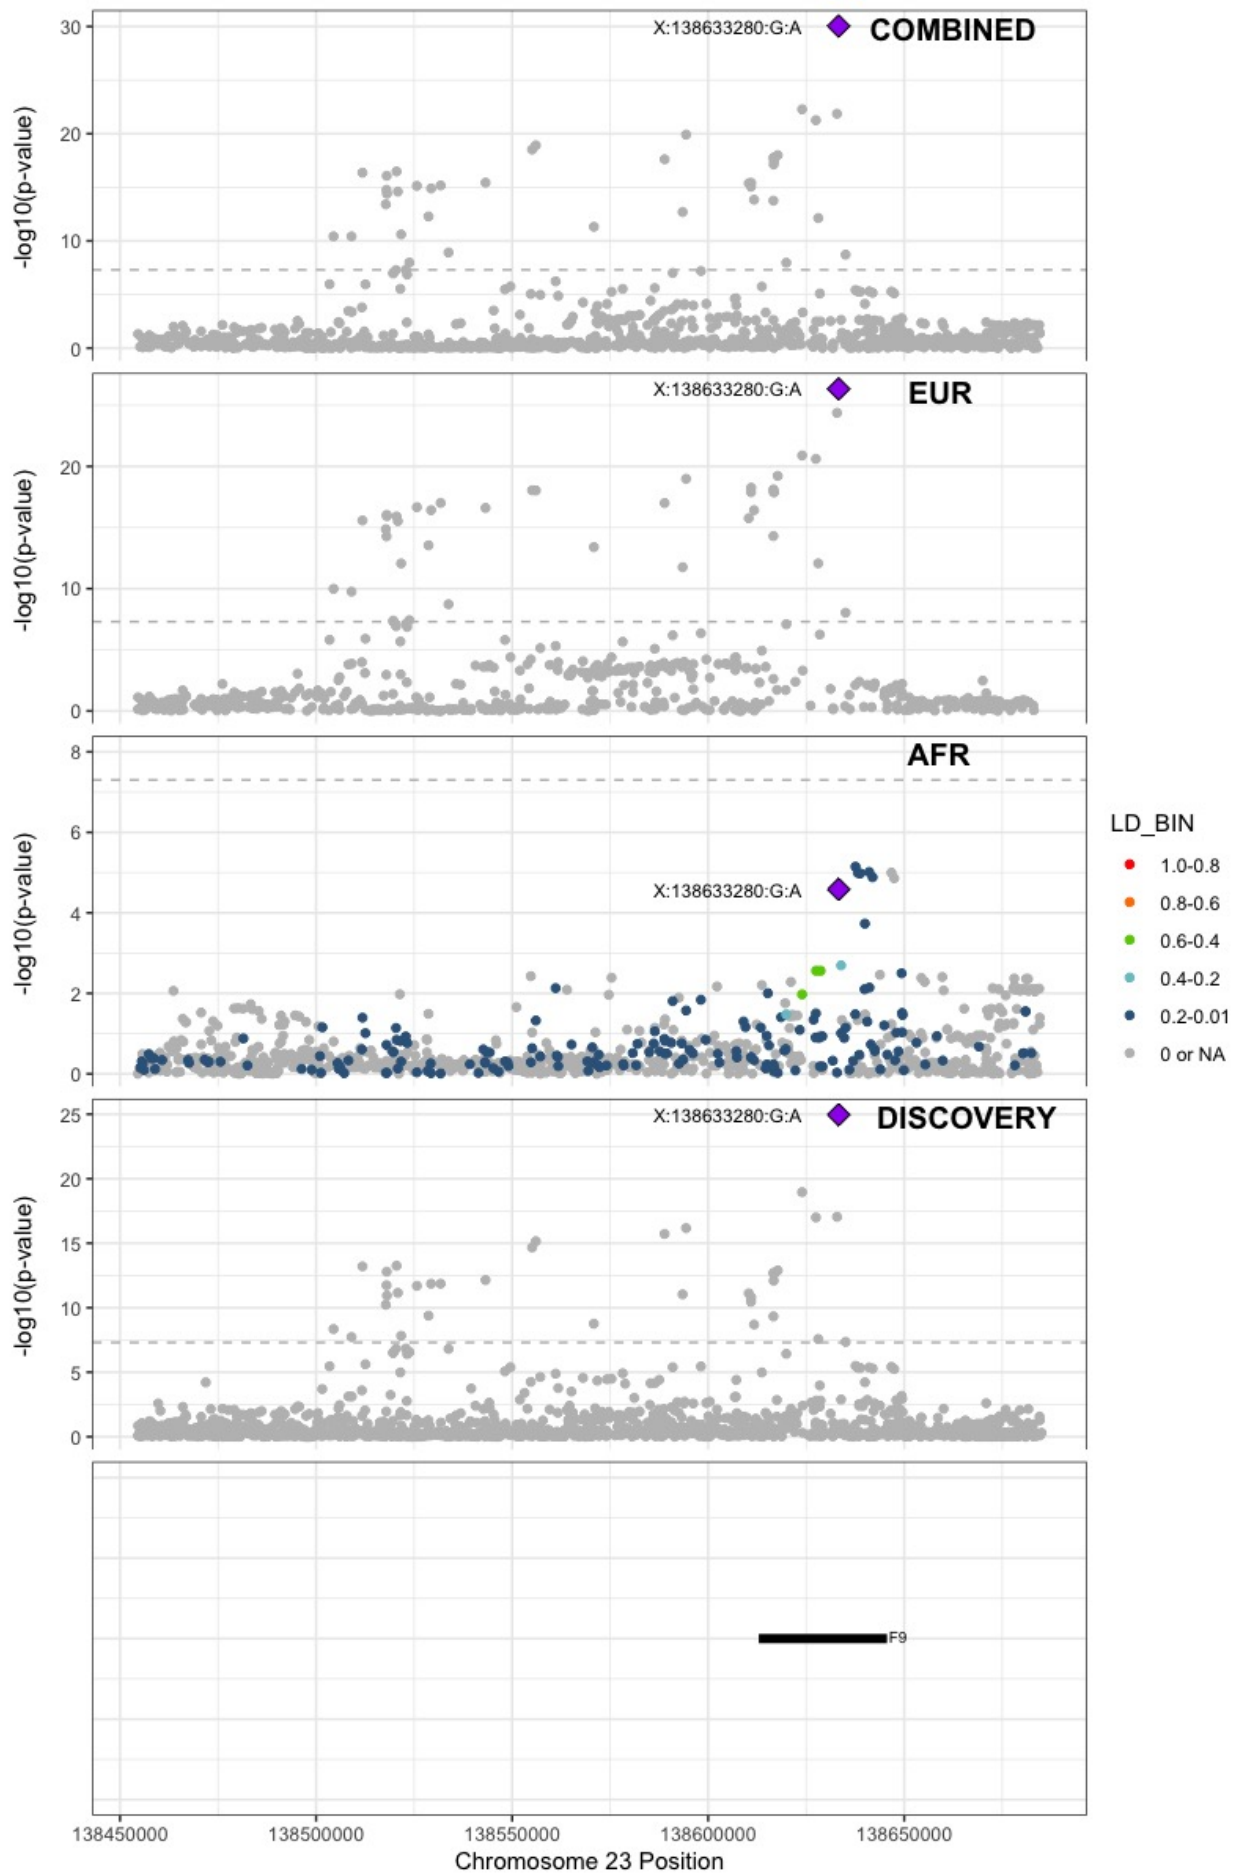

Supplementary Figure 6.111 – rs2084408 (chr23:154346709) in locus 135 (BRCC3)

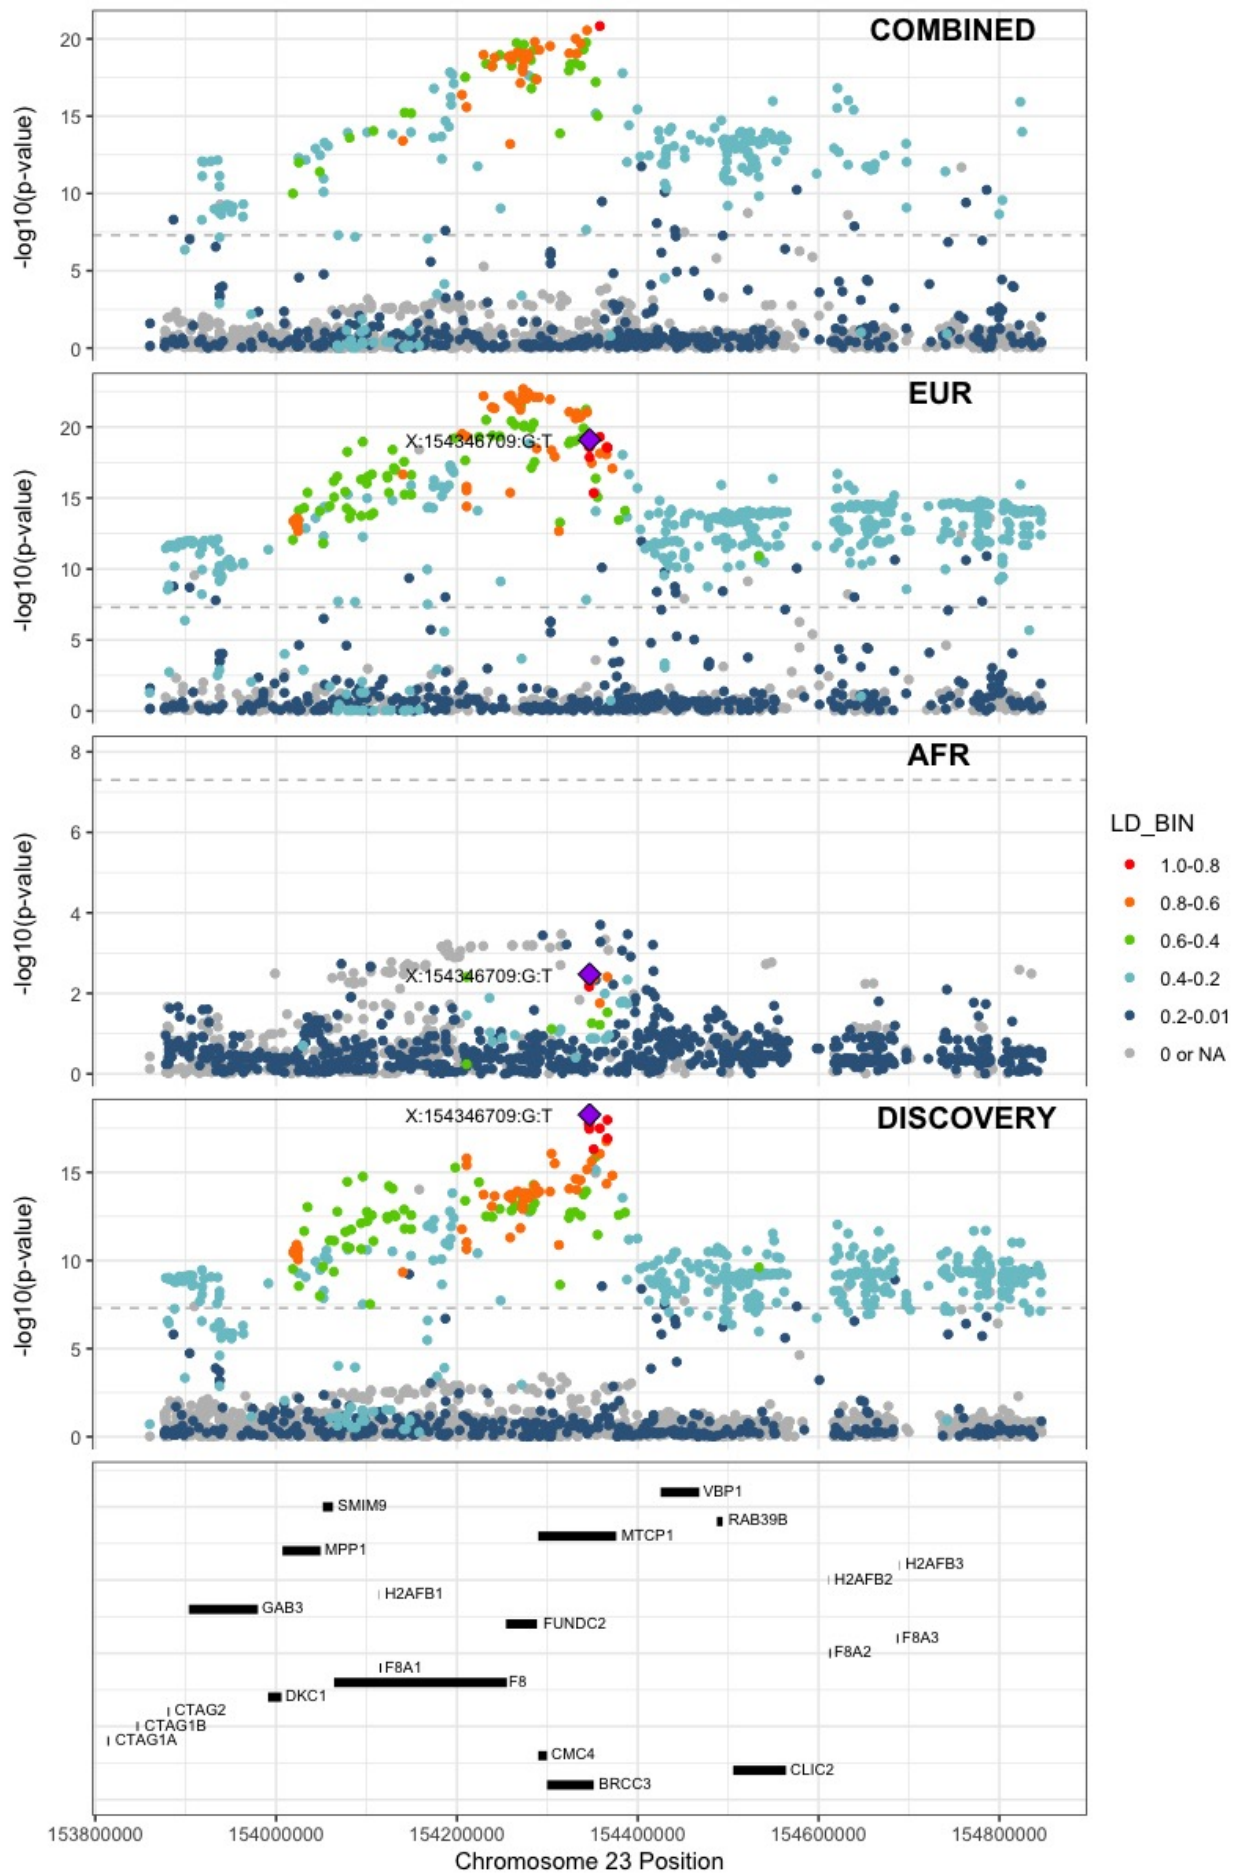

Supplement: Supplementary file [file media-6.pdf]
