# Supplementary material for: Cross-Ancestry Investigation of Venous Thromboembolism Genomic Predictors
Source: bioRxiv or medRxiv preprint supplement (doi:10.1101/2022.03.04.22271003), 2022-03-08

**Supplementary Figure 8.****Regional association plots of African analysis lead variants.**

|      |                                                                        |    |
|------|------------------------------------------------------------------------|----|
| 8.1  | rs10800427 (chr1:169272451) in locus 9 (NME7) . . . . .                | 2  |
| 8.2  | rs182293241 (chr2:128029746) in locus 18 (ERCC3) . . . . .             | 3  |
| 8.3  | rs529326506 (chr3:90503764) in locus 26 (EPHA3;NONE) . . . . .         | 4  |
| 8.4  | rs80133433 (chr3:93791551) in locus 27 (NSUN3) . . . . .               | 5  |
| 8.5  | rs2066864 (chr4:155525695) in locus 39 (FGG) . . . . .                 | 6  |
| 8.6  | rs56810541 (chr4:187200550) in locus 40 (F11) . . . . .                | 7  |
| 8.7  | rs8176719 (chr9:136132908) in locus 66 (ABO) . . . . .                 | 8  |
| 8.8  | rs57950734 (chr12:6145649) in locus 87 (VWF) . . . . .                 | 9  |
| 8.9  | rs76668186 (chr16:6686083) in locus 104 (RBFOX1) . . . . .             | 10 |
| 8.10 | rs13306849 (chr20:23030199) in locus 126 (THBD) . . . . .              | 11 |
| 8.11 | rs1376223093 (chr20:33756333) in locus 127 (MMP24-AS1-EDEM2) . . . . . | 12 |
| 8.12 | rs114102448 (chr21:47523605) in locus 128 (COL6A2) . . . . .           | 13 |
| 8.13 | rs73174952 (chr22:43111733) in locus 130 (A4GALT) . . . . .            | 14 |

Supplementary Figure 8.1 – rs10800427 (chr1:169272451) in locus 9 (NME7)

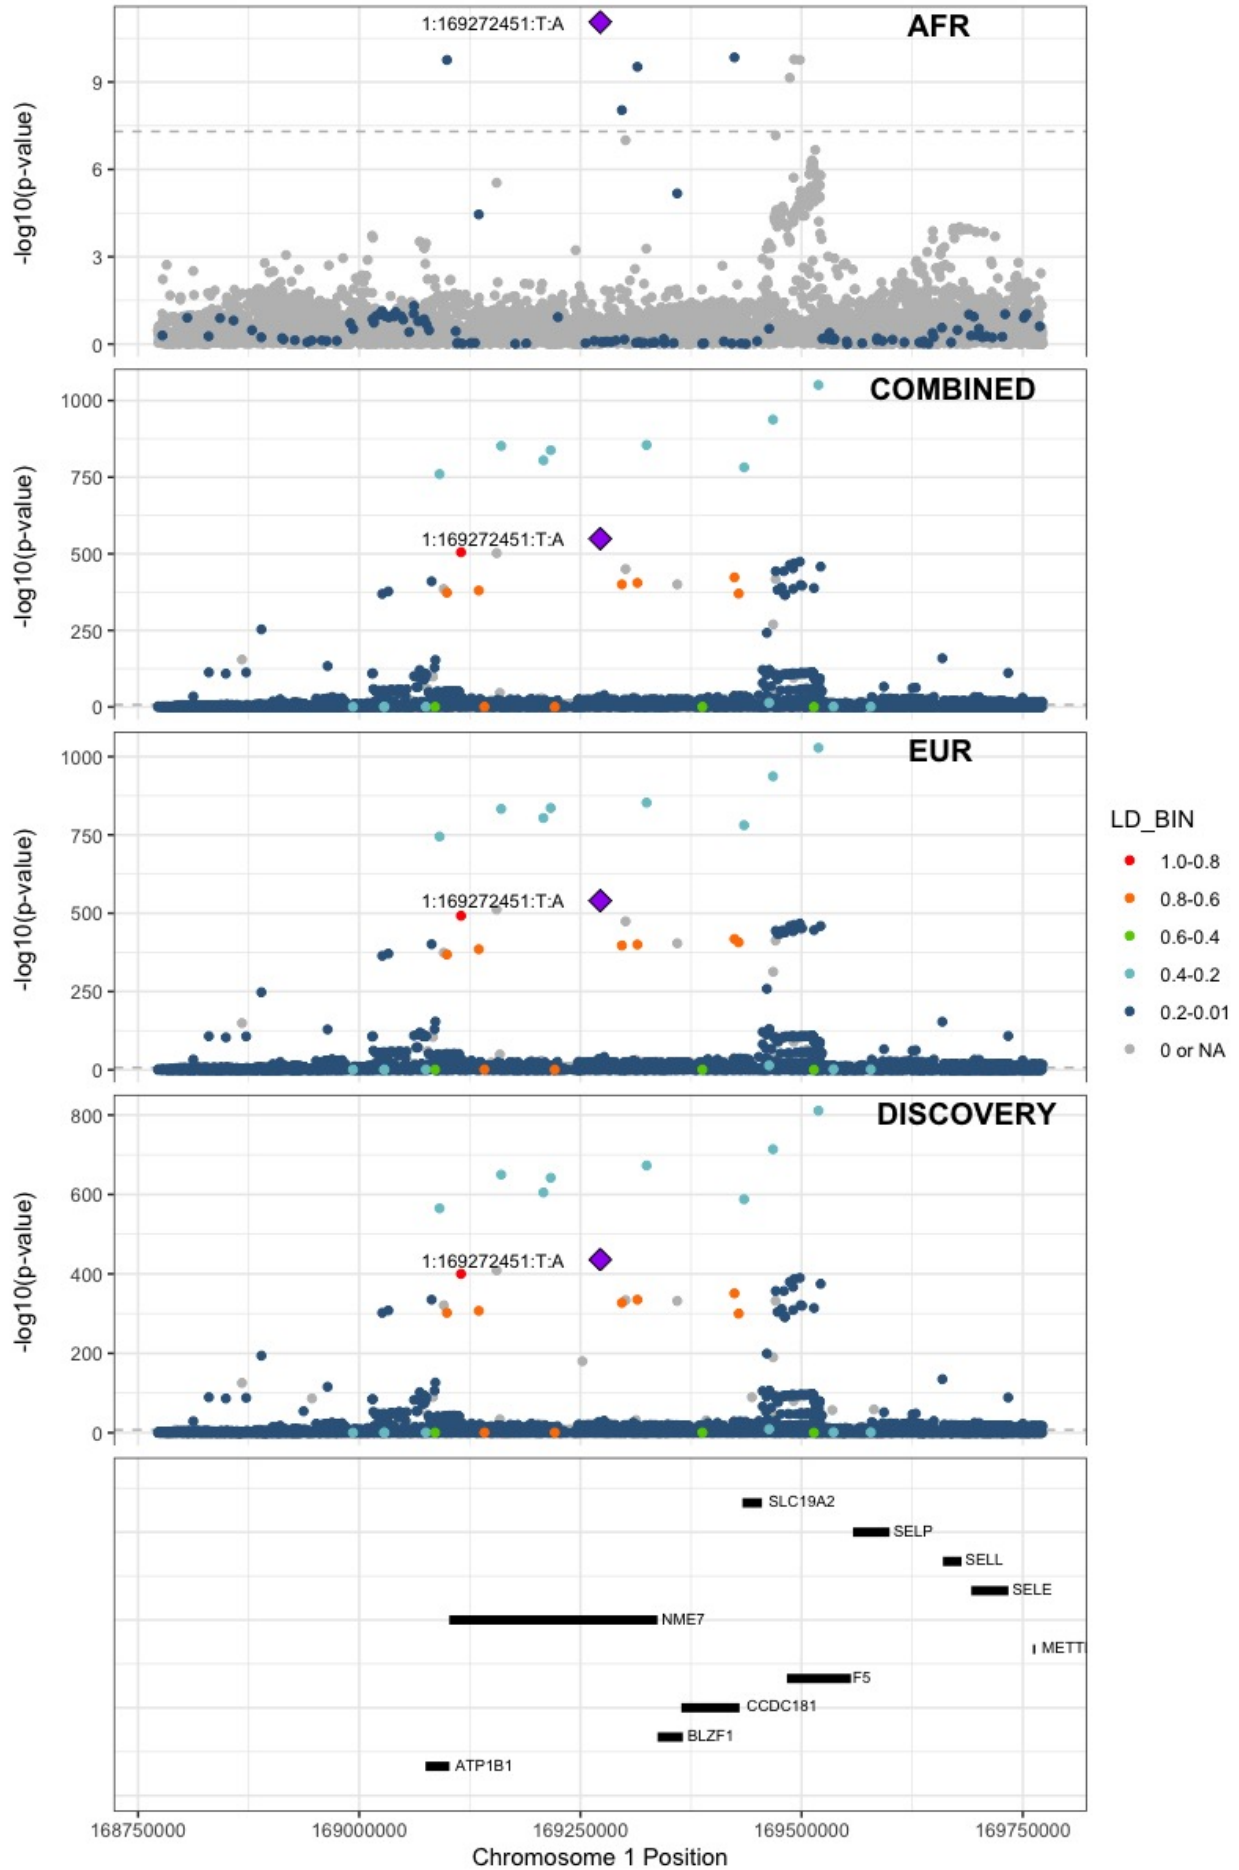

Supplementary Figure 8.2 – rs182293241 (chr2:128029746) in locus 18 (ERCC3)

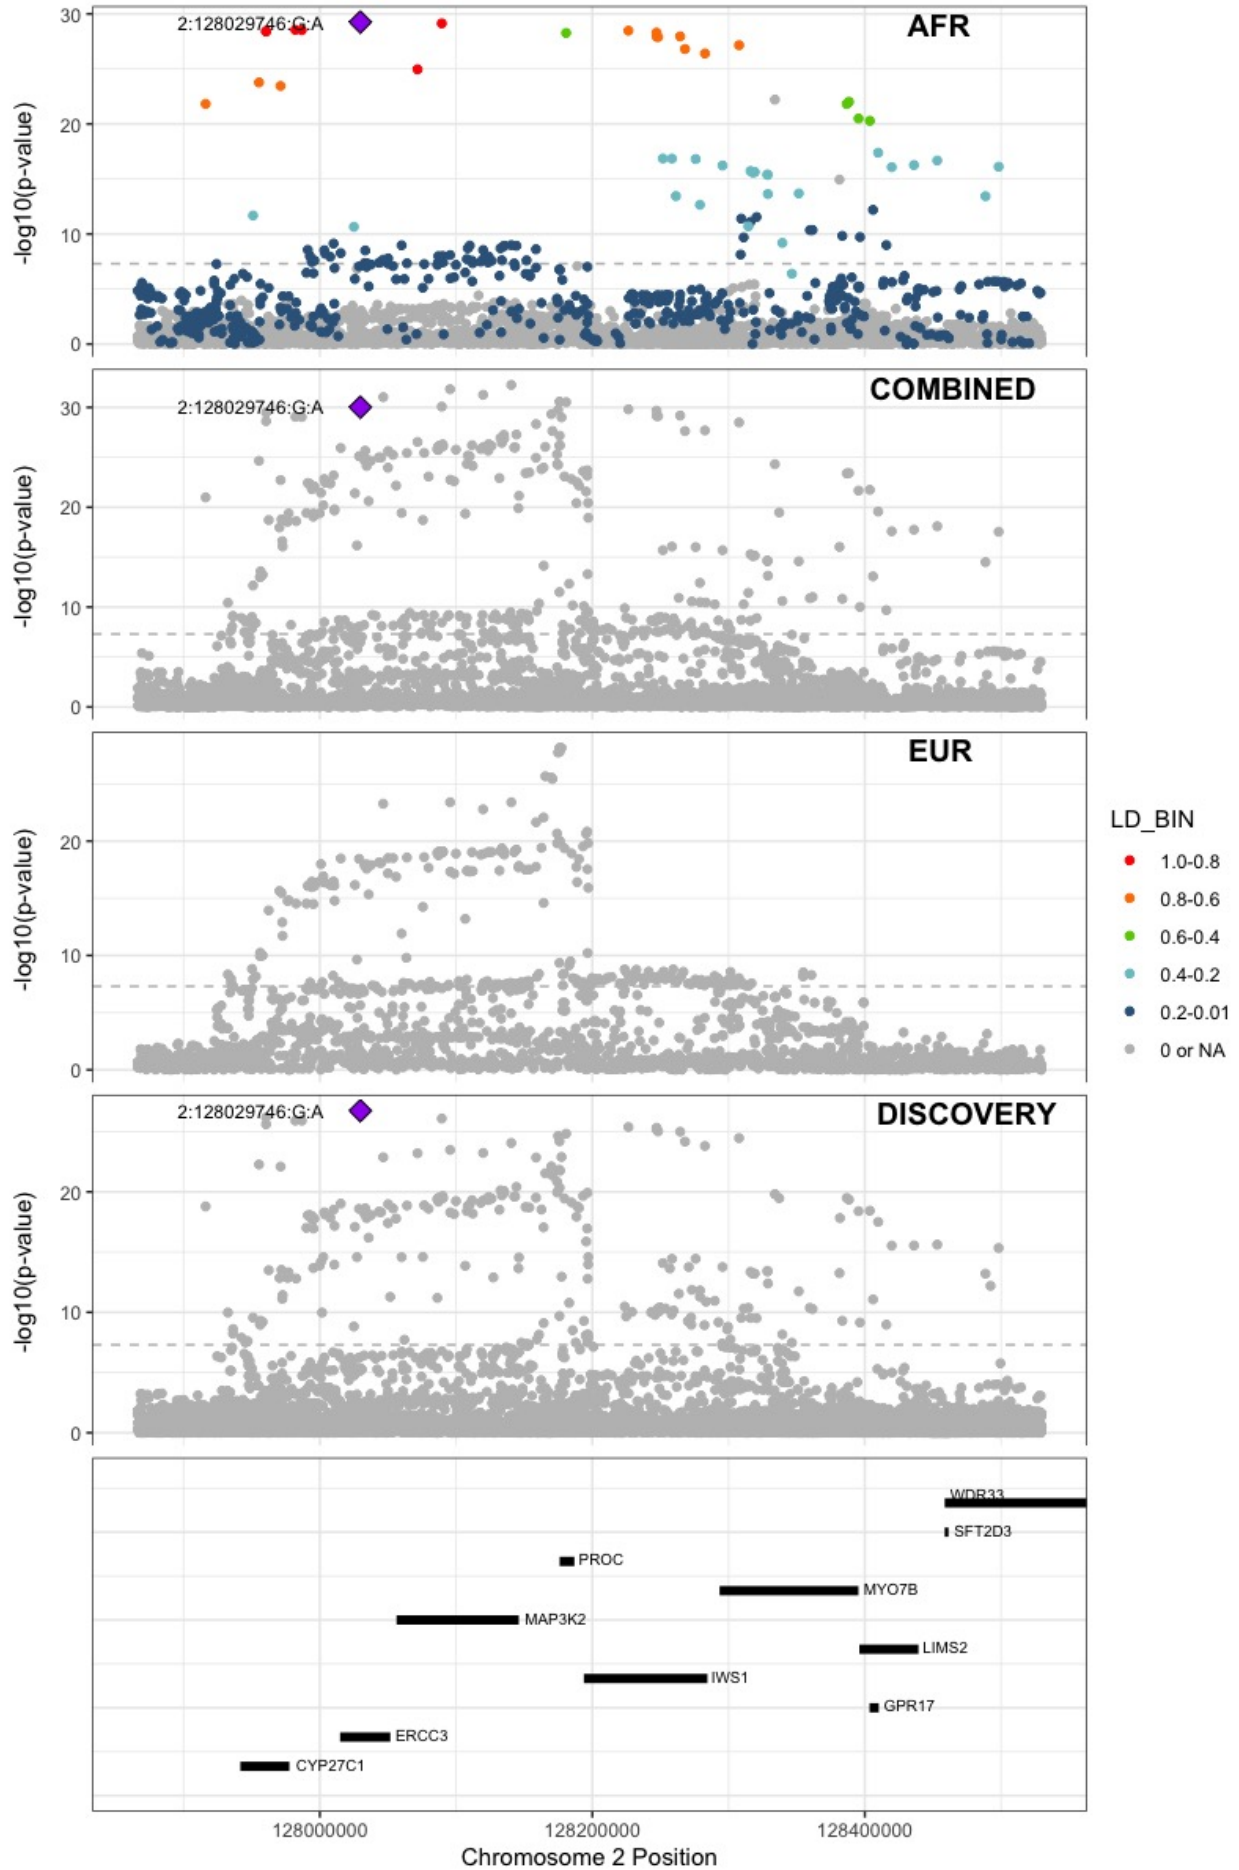

Supplementary Figure 8.3 – rs529326506 (chr3:90503764) in locus 26 (EPHA3;NONE)

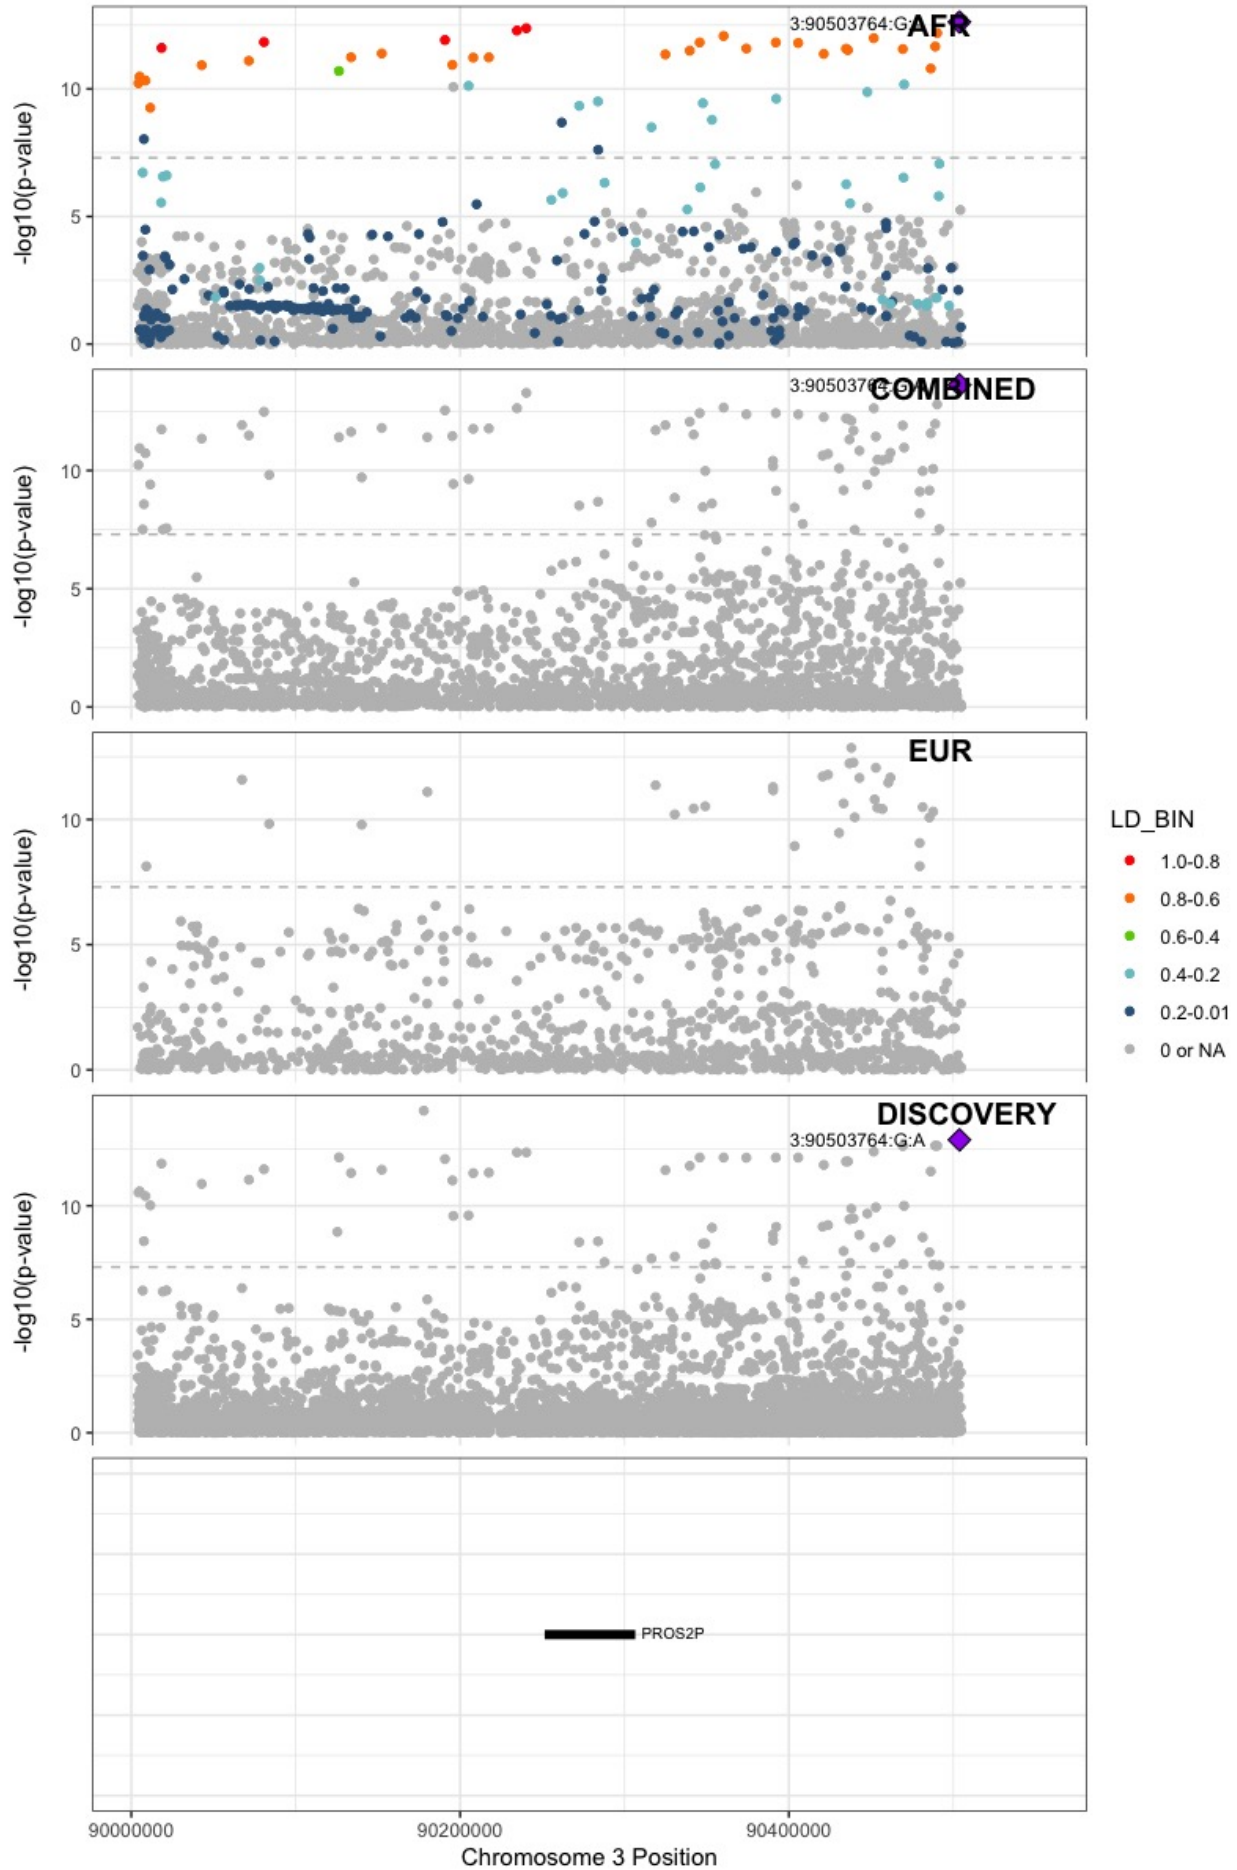

Supplementary Figure 8.4 – rs80133433 (chr3:93791551) in locus 27 (NSUN3)

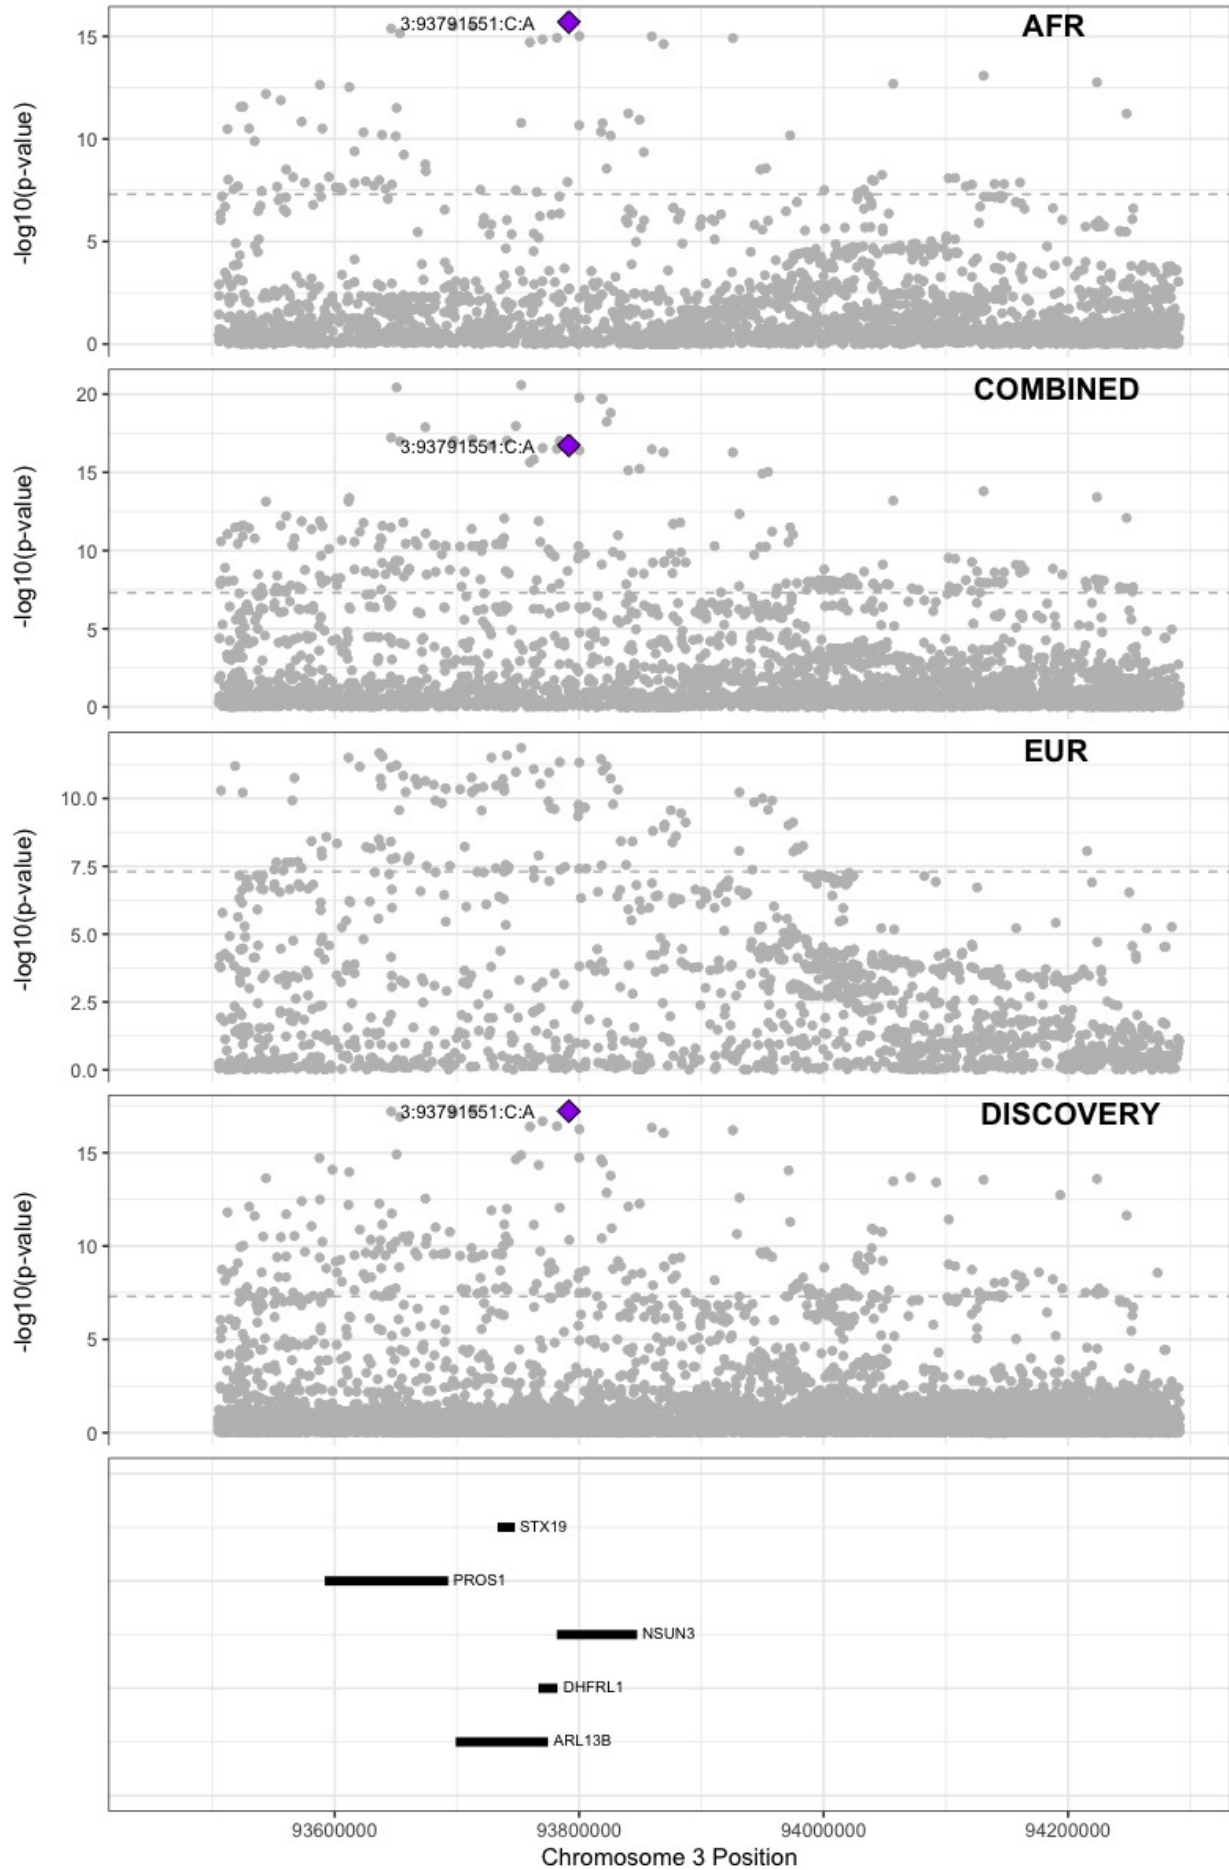

Supplementary Figure 8.5 – rs2066864 (chr4:155525695) in locus 39 (FGG)

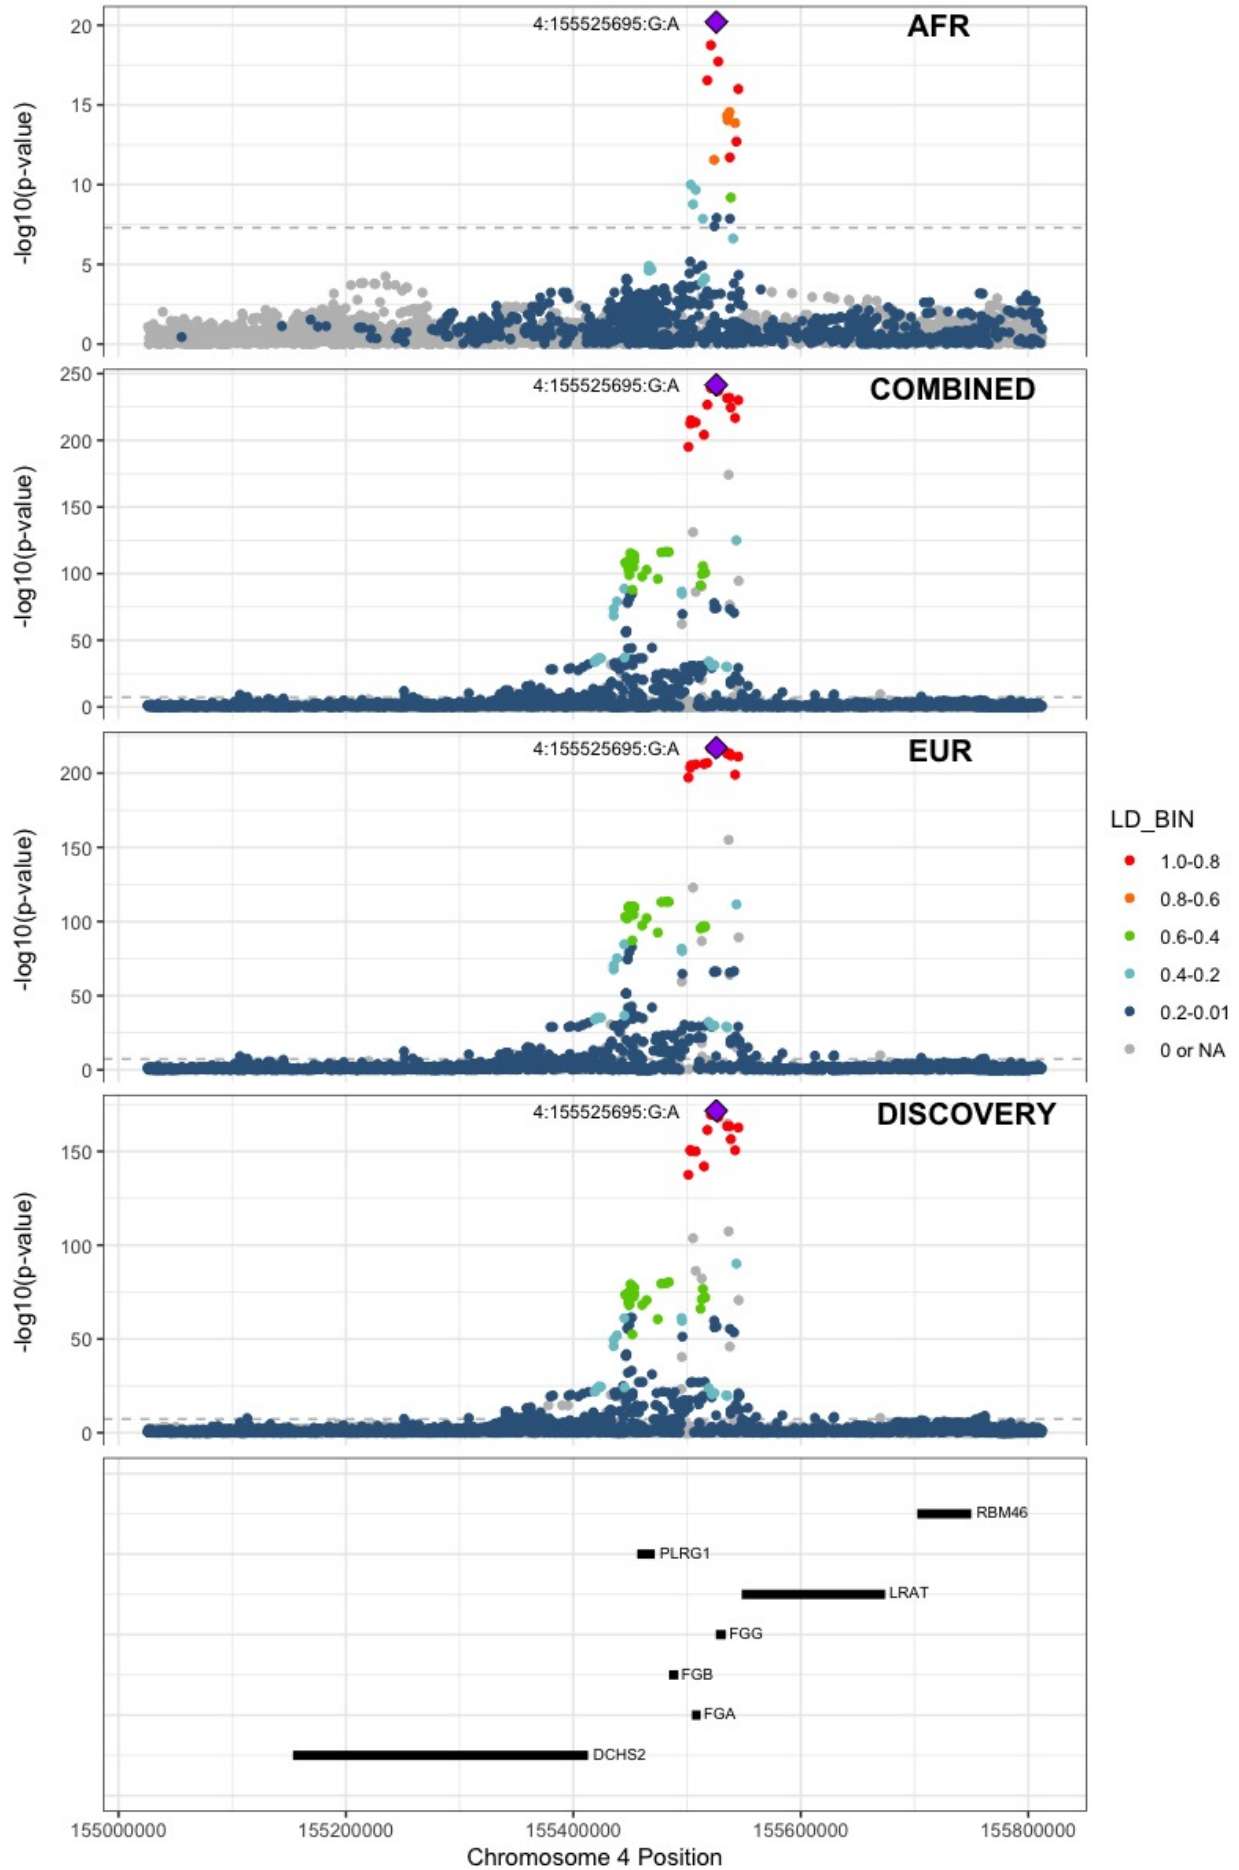

Supplementary Figure 8.6 – rs56810541 (chr4:187200550) in locus 40 (F11)

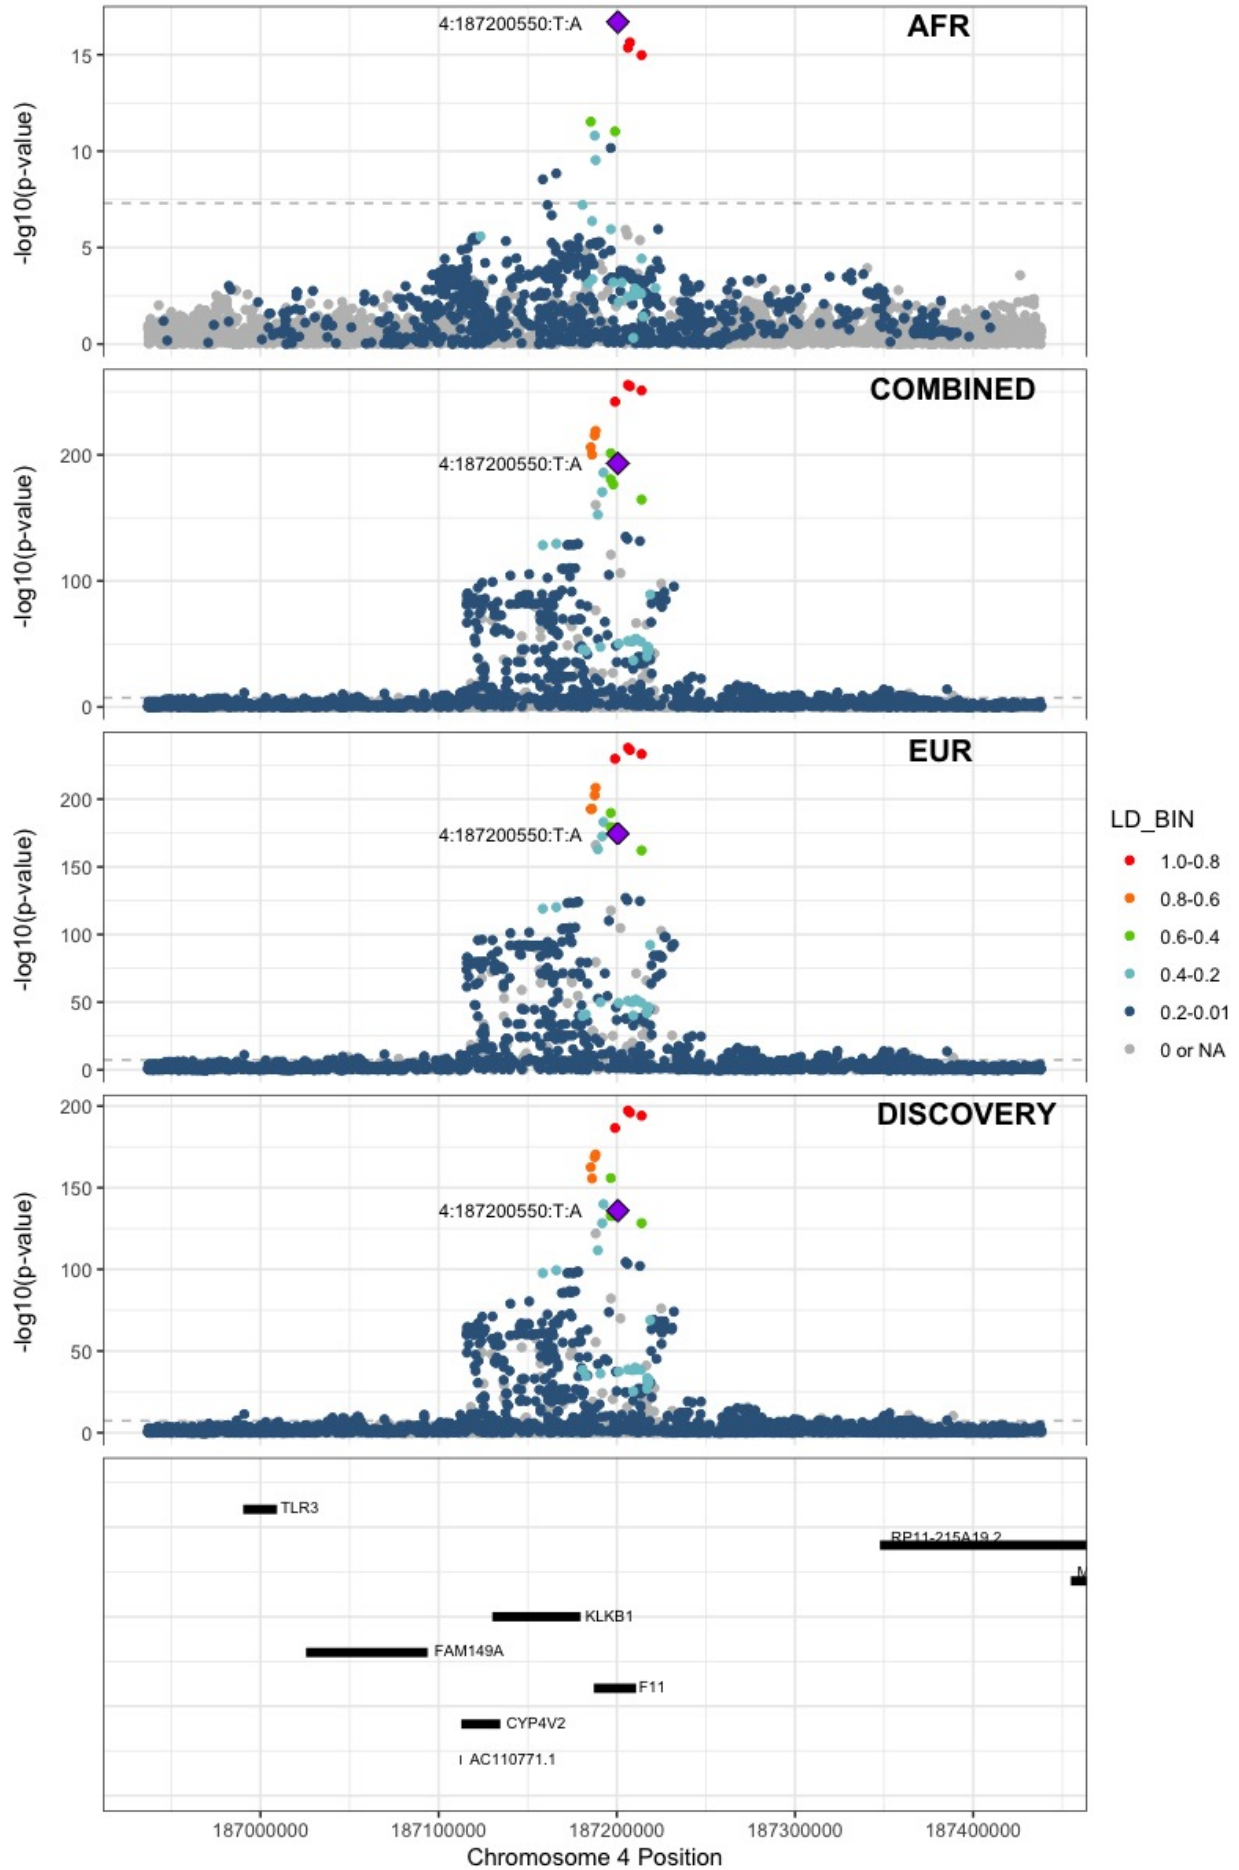

Supplementary Figure 8.7 – rs8176719 (chr9:136132908) in locus 66 (ABO)

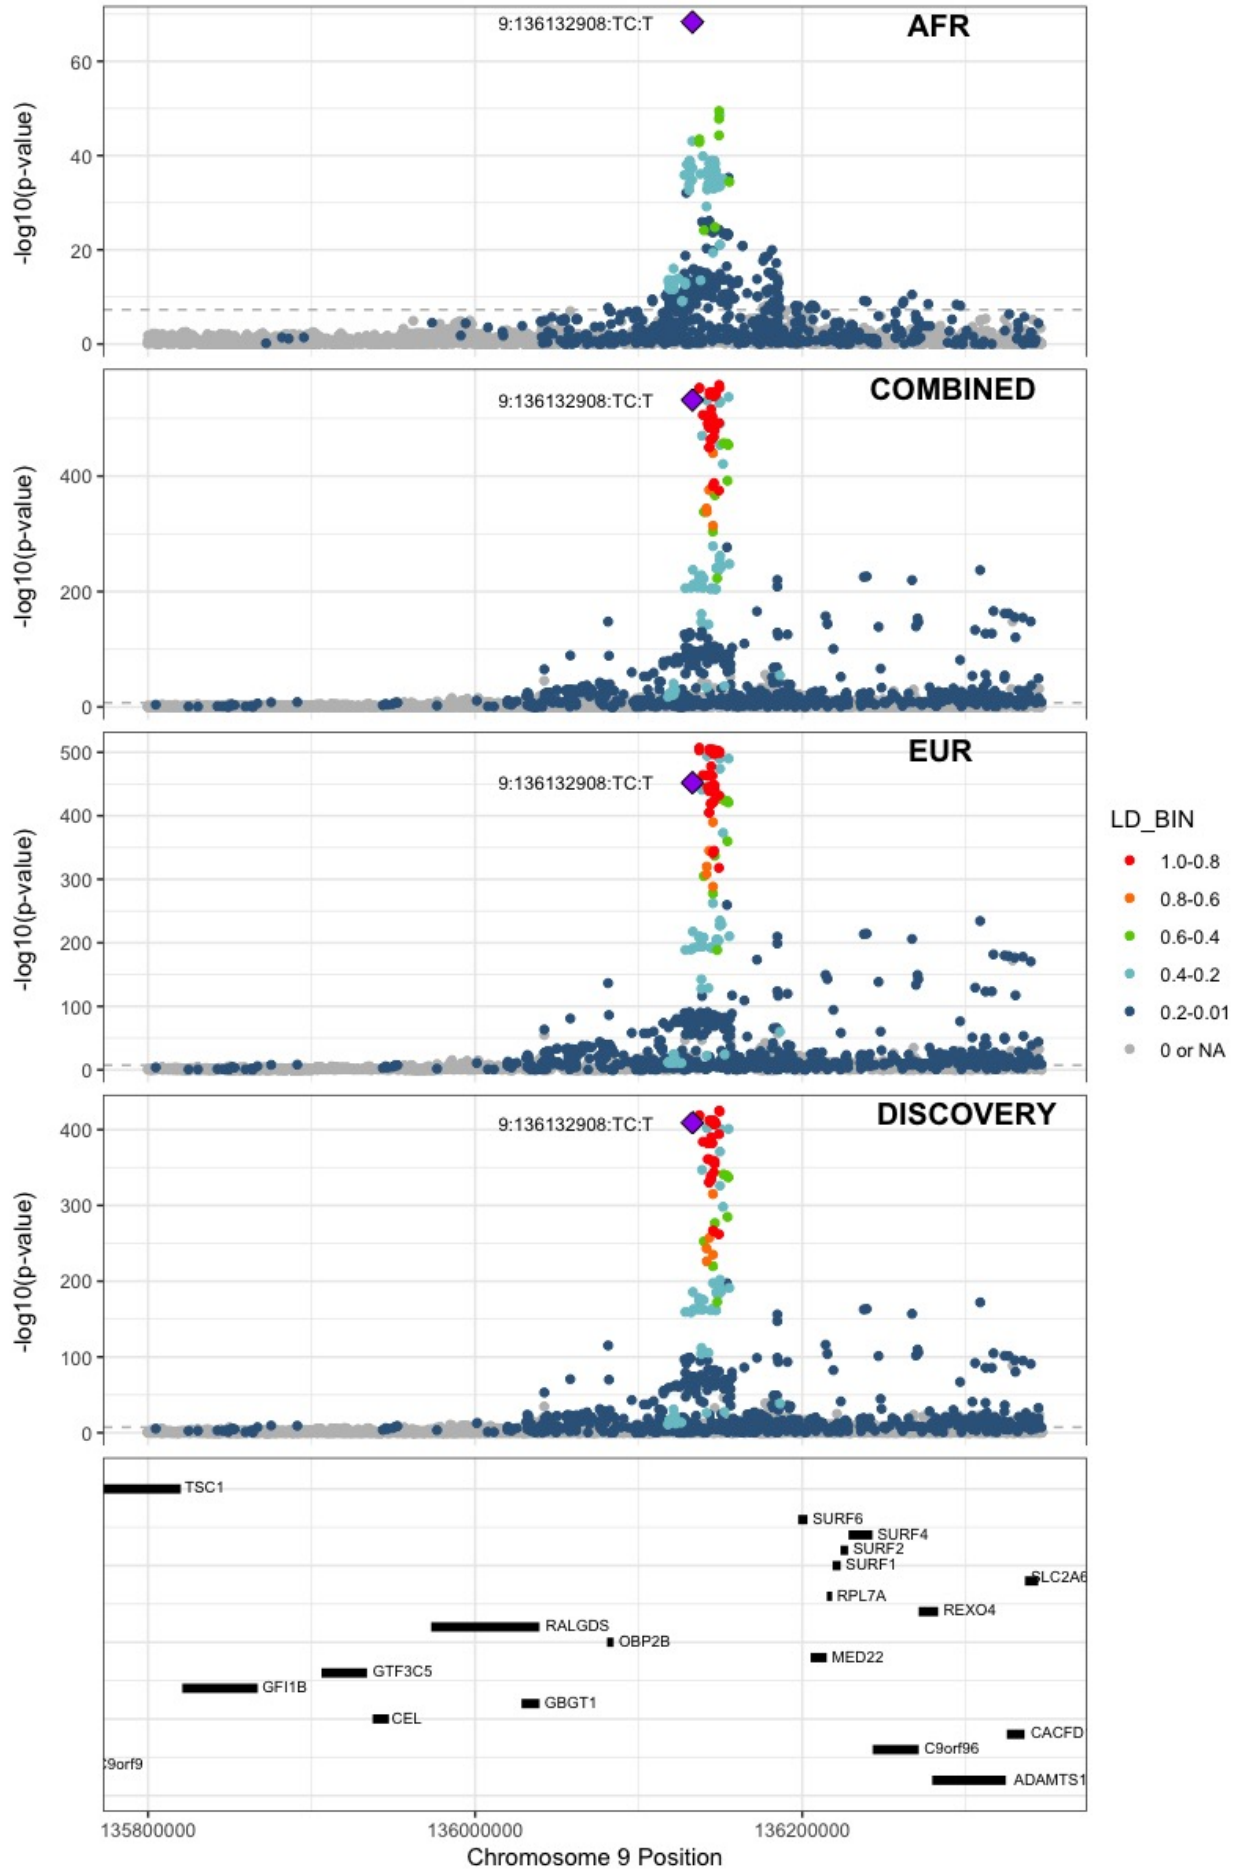



Supplementary Figure 8.8 – rs57950734 (chr12:6145649) in locus 87 (VWF)

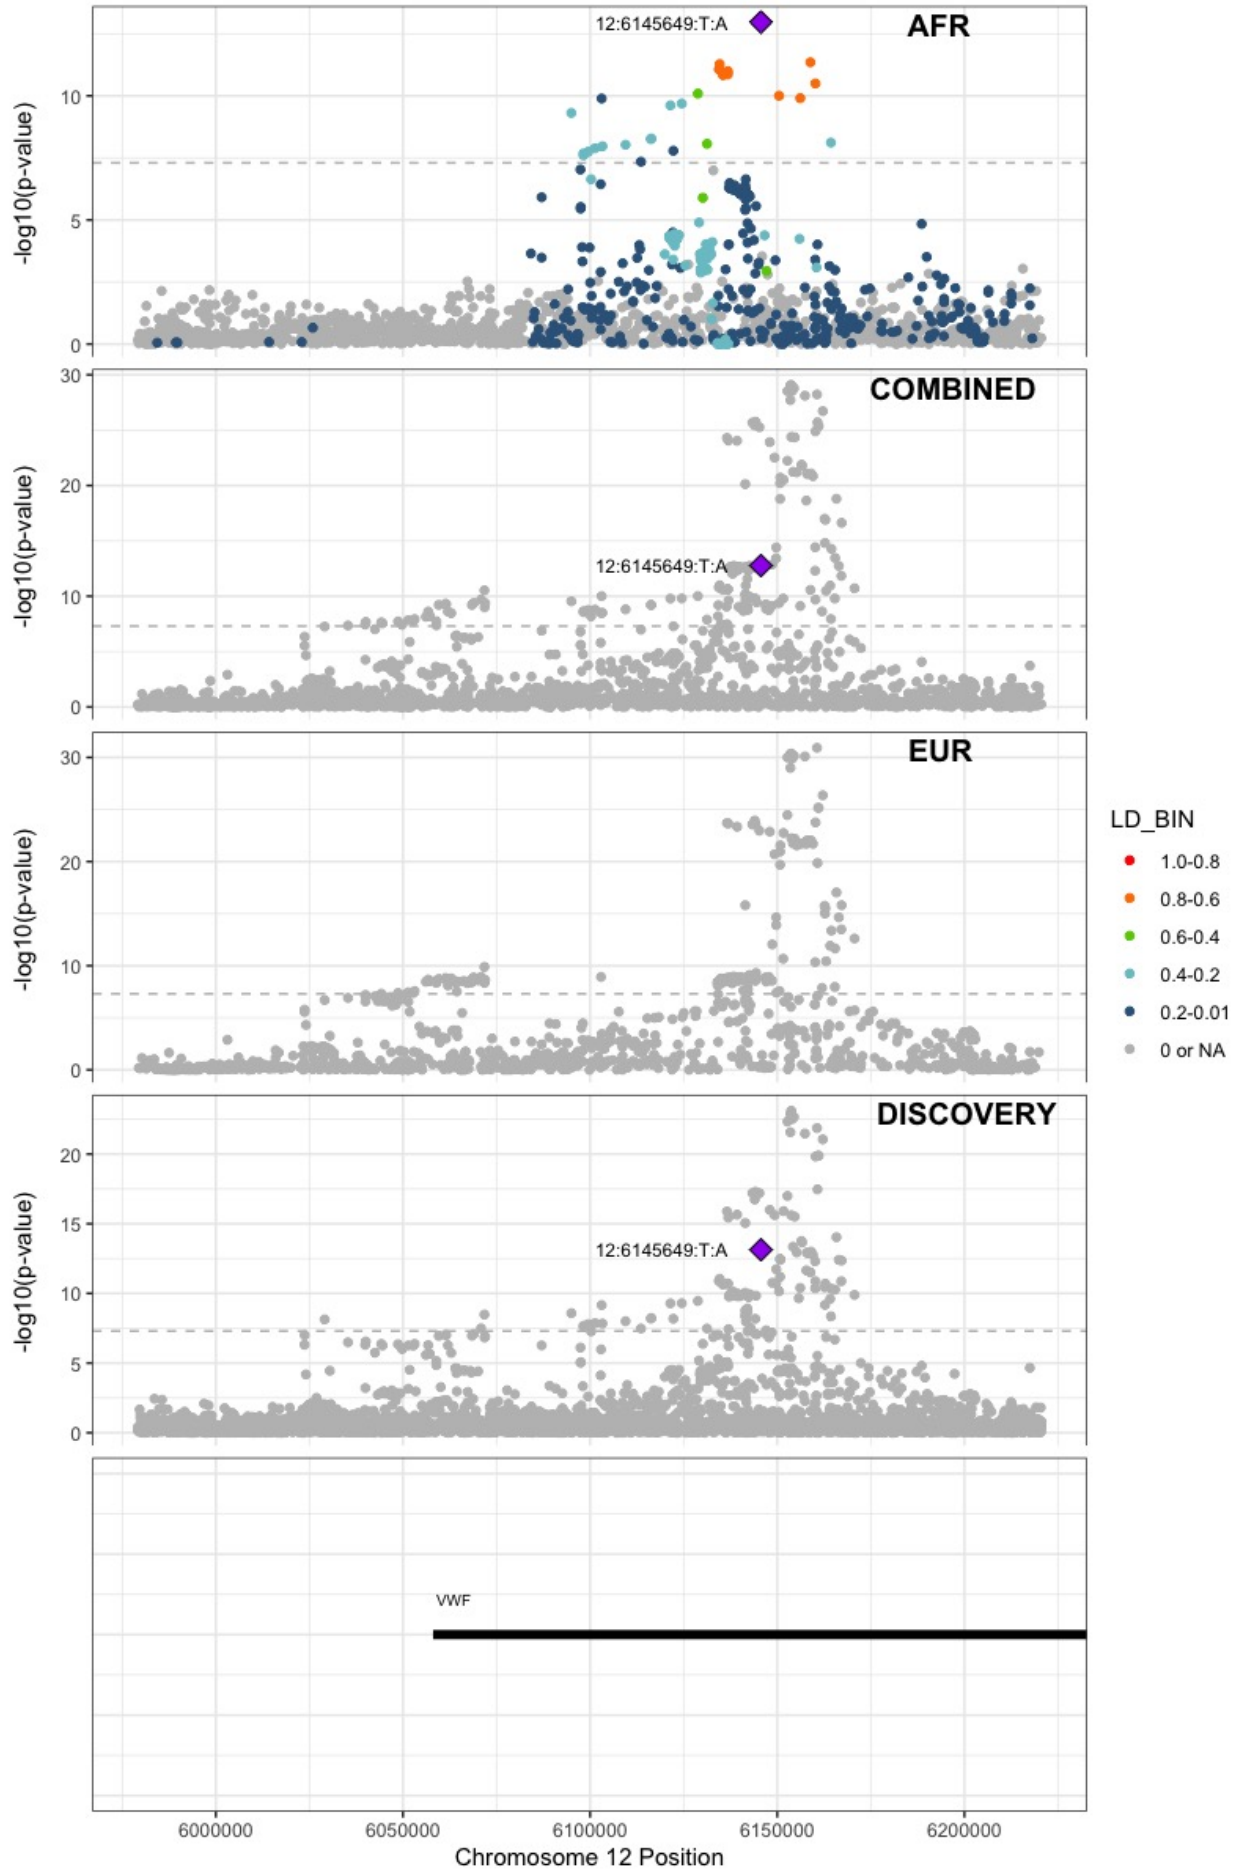

Supplementary Figure 8.9 – rs76668186 (chr16:6686083) in locus 104 (RBFOX1)

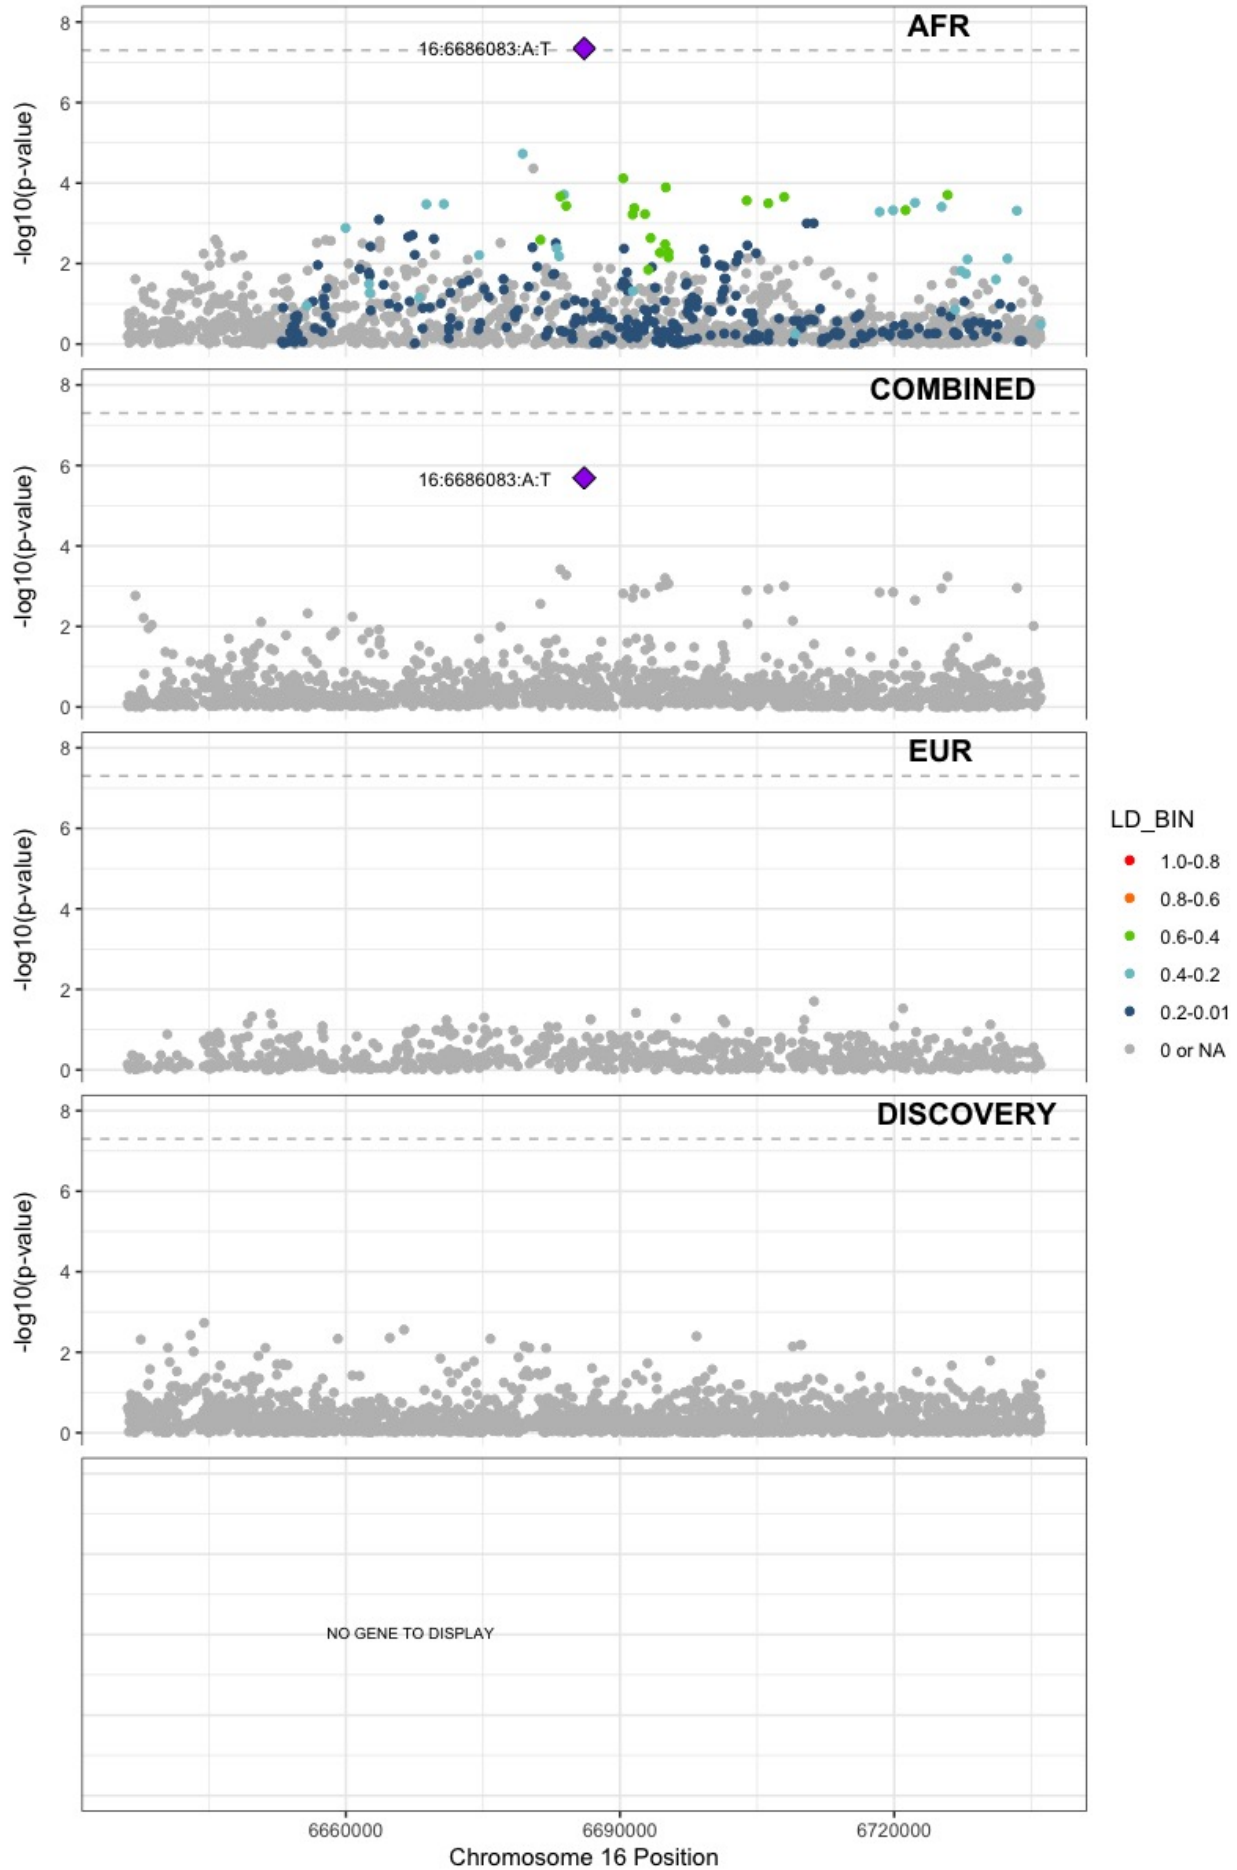

Supplementary Figure 8.10 – rs13306849 (chr20:23030199) in locus 126 (THBD)

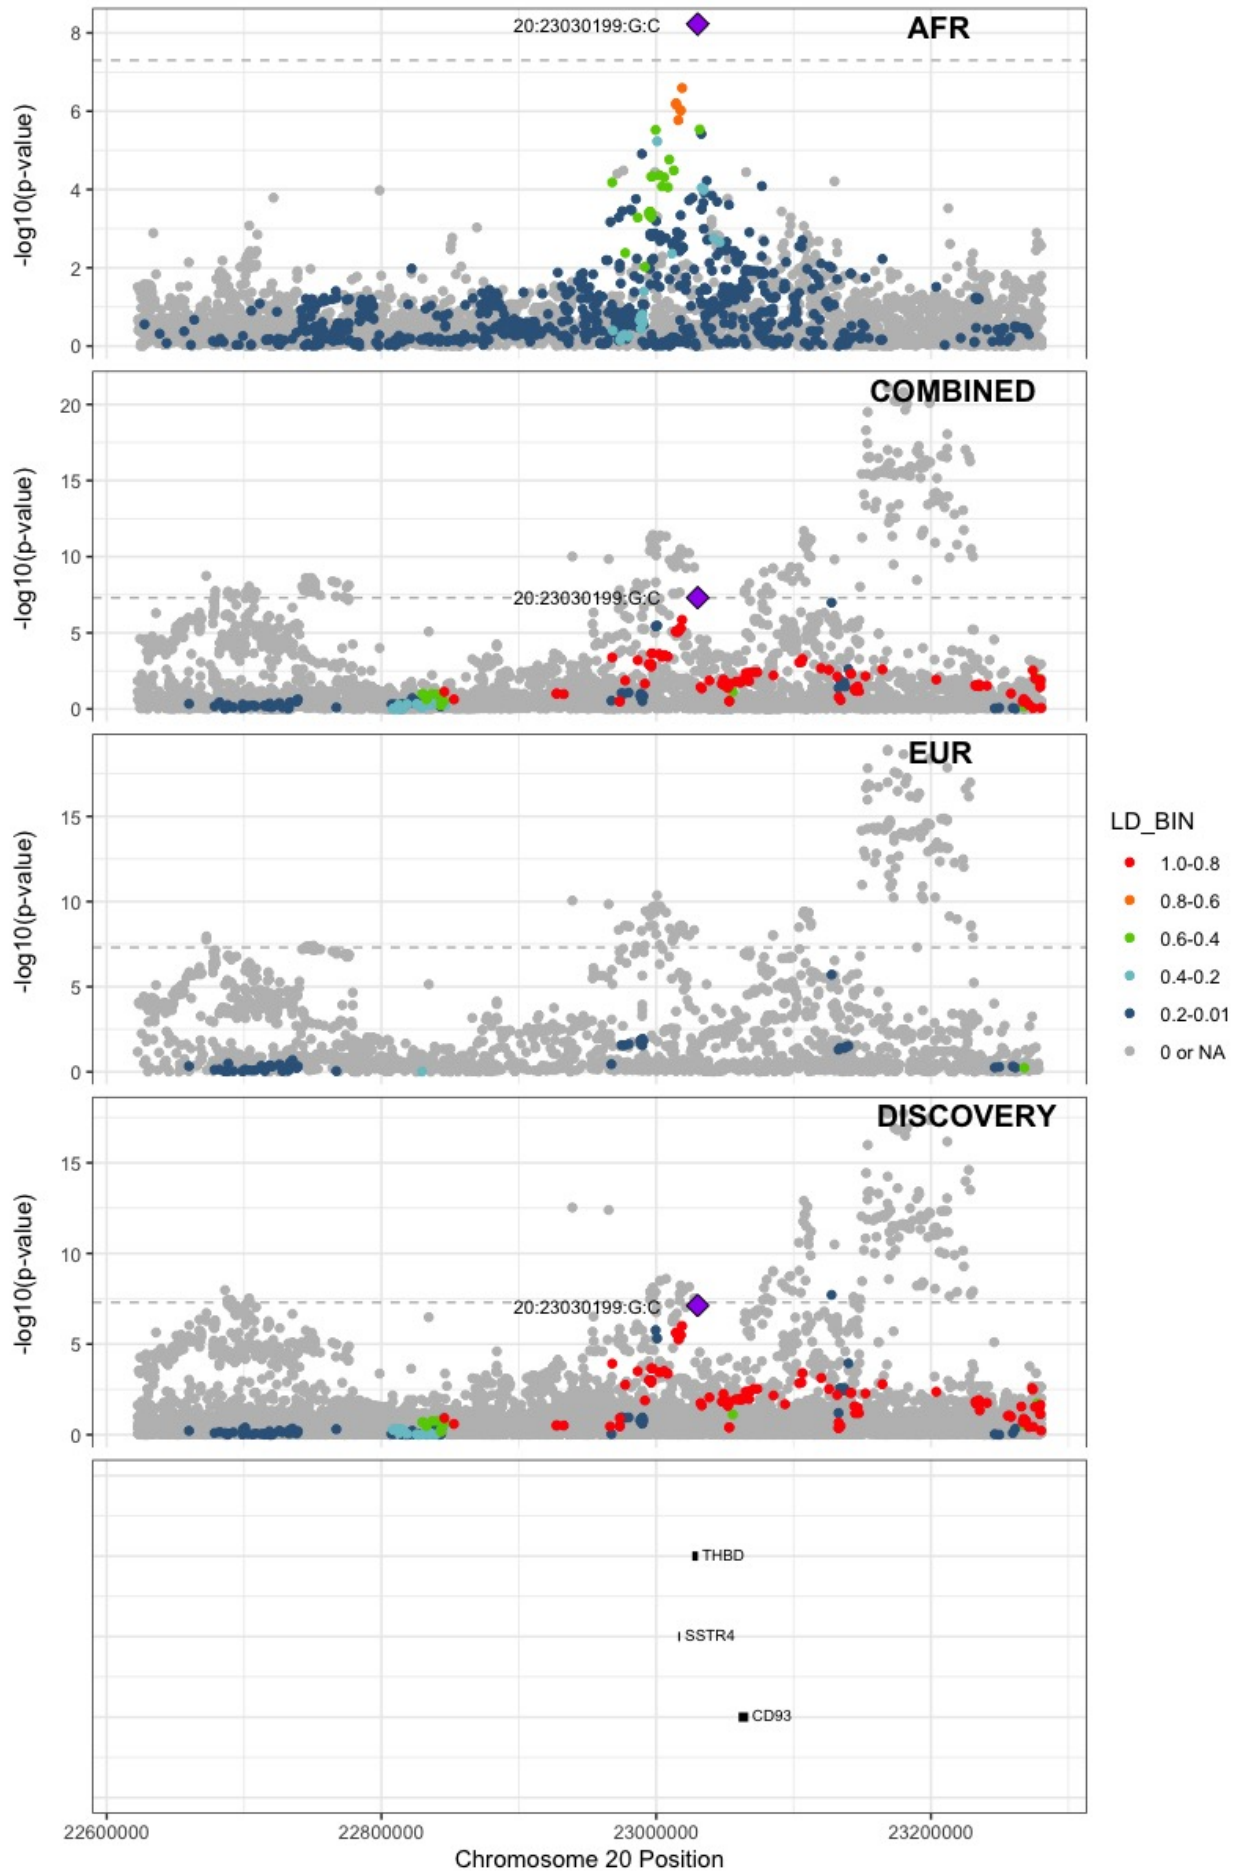

Supplementary Figure 8.11 – rs1376223093 (chr20:33756333) in locus 127 (MMP24-AS1-EDEM2)

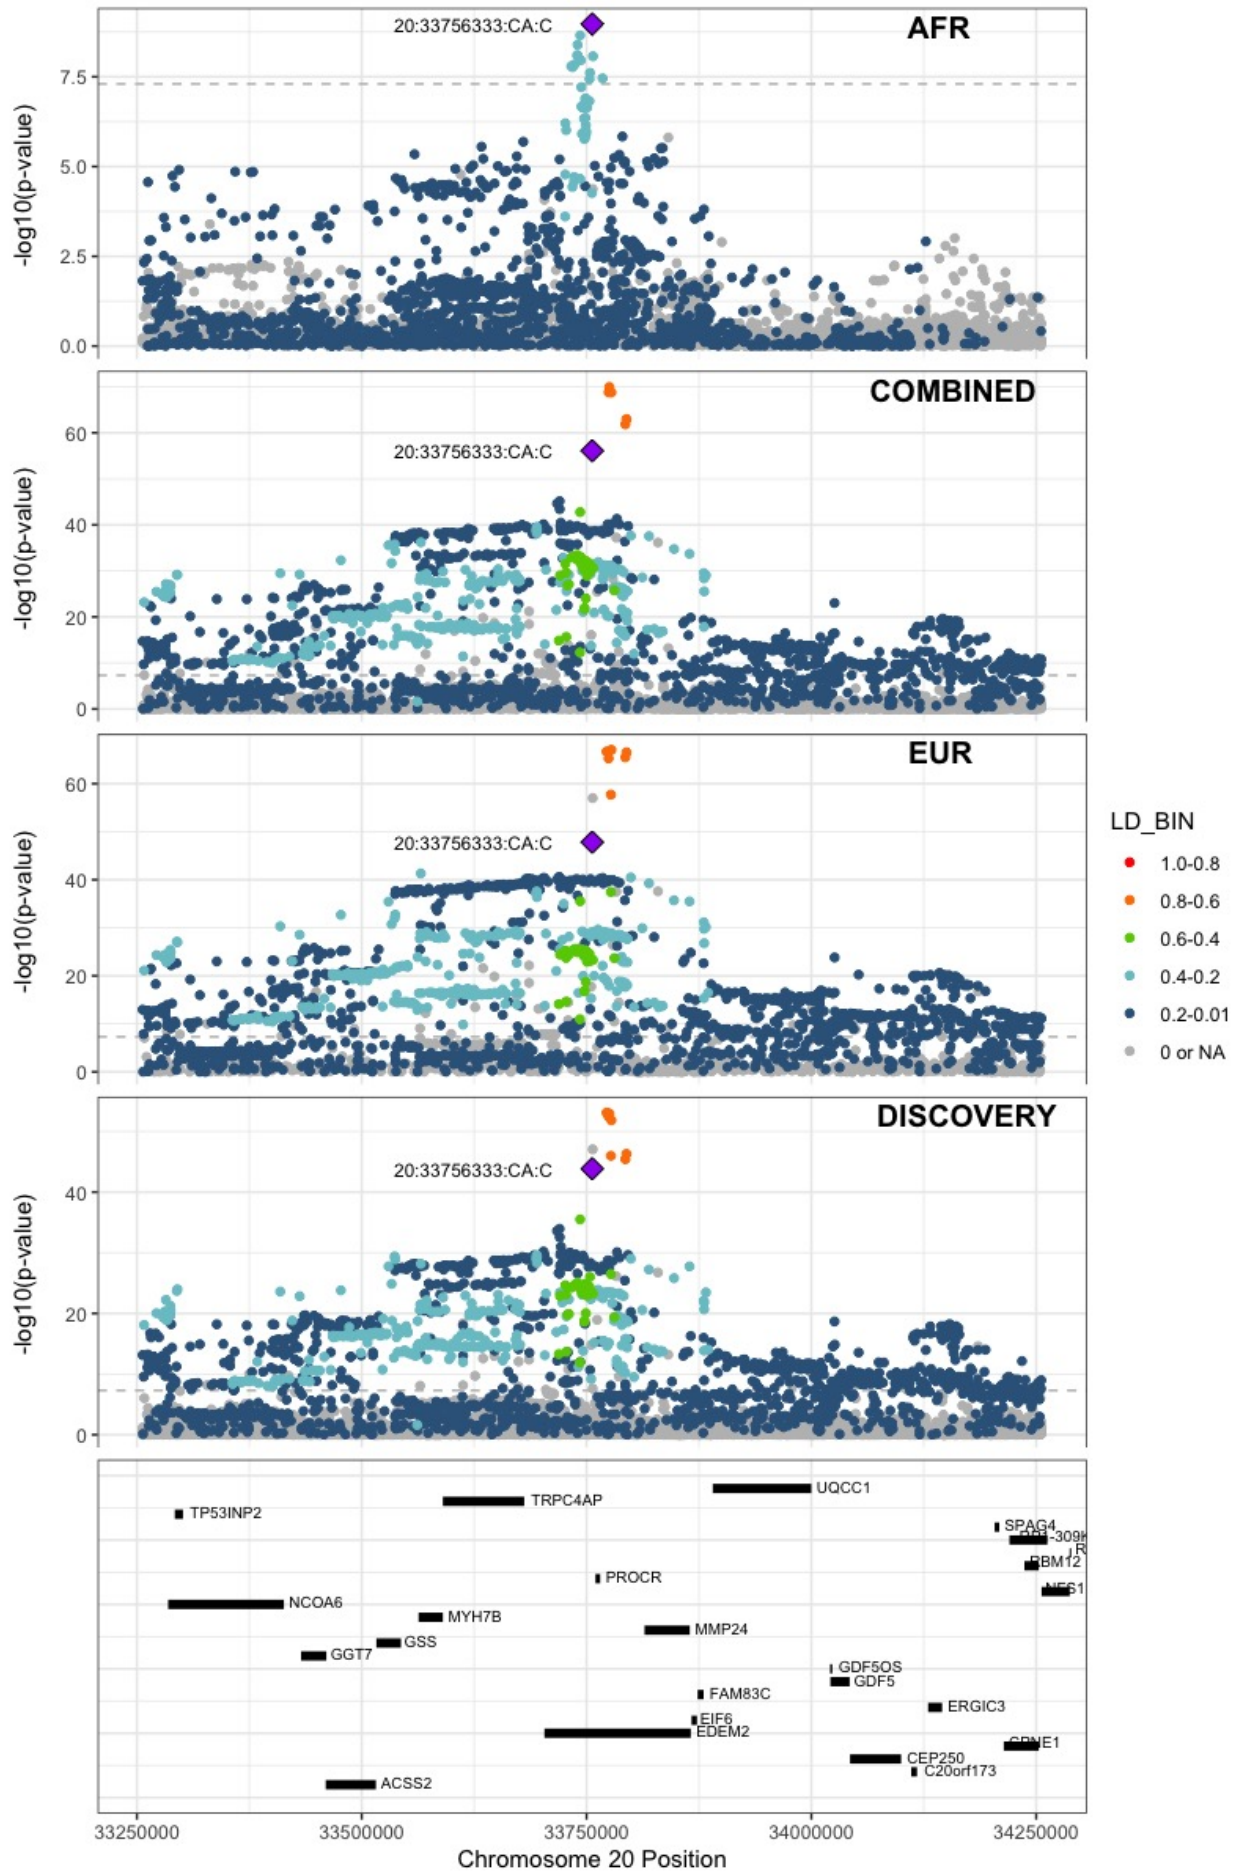

Supplementary Figure 8.12 – rs114102448 (chr21:47523605) in locus 128 (COL6A2)

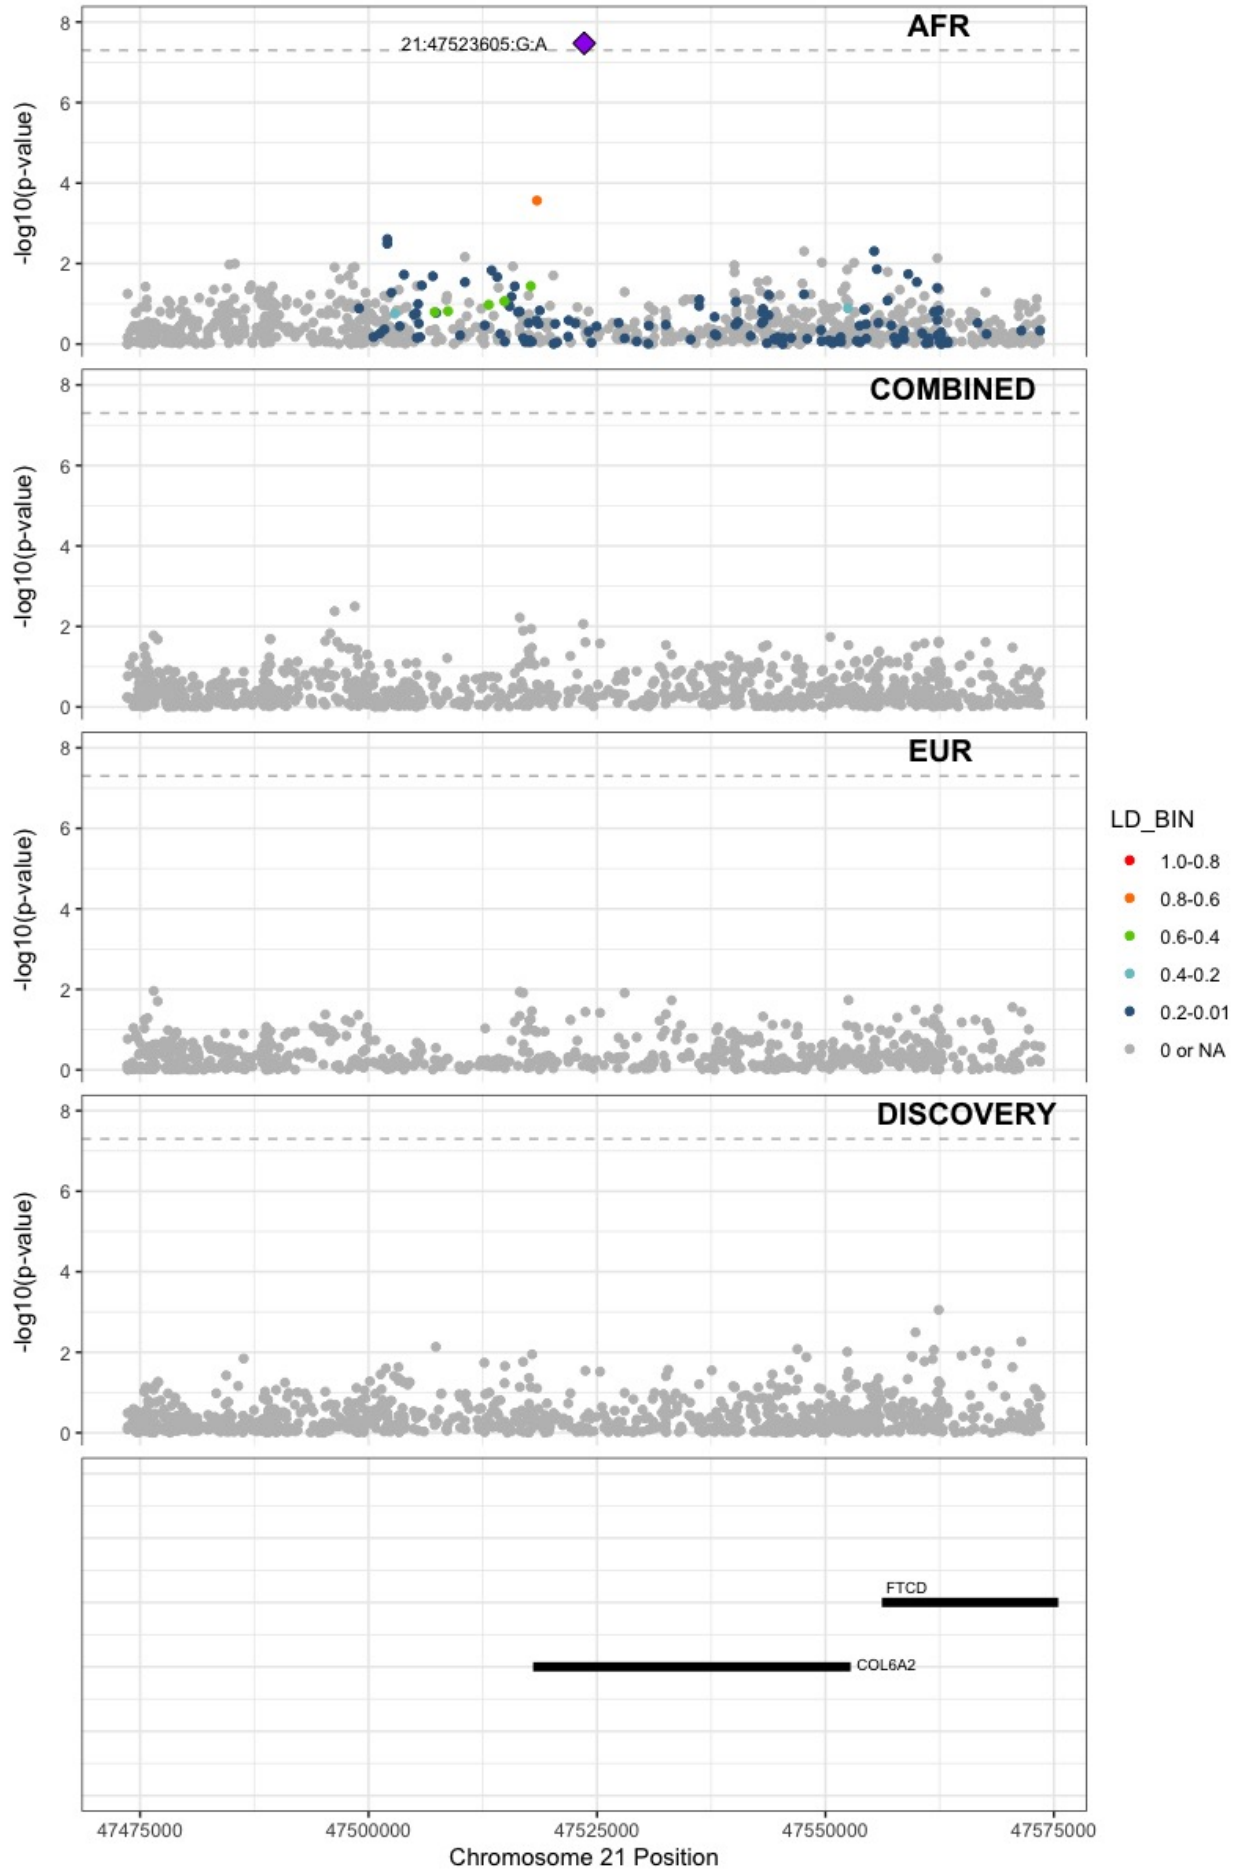

Supplementary Figure 8.13 – rs73174952 (chr22:43111733) in locus 130 (A4GALT)

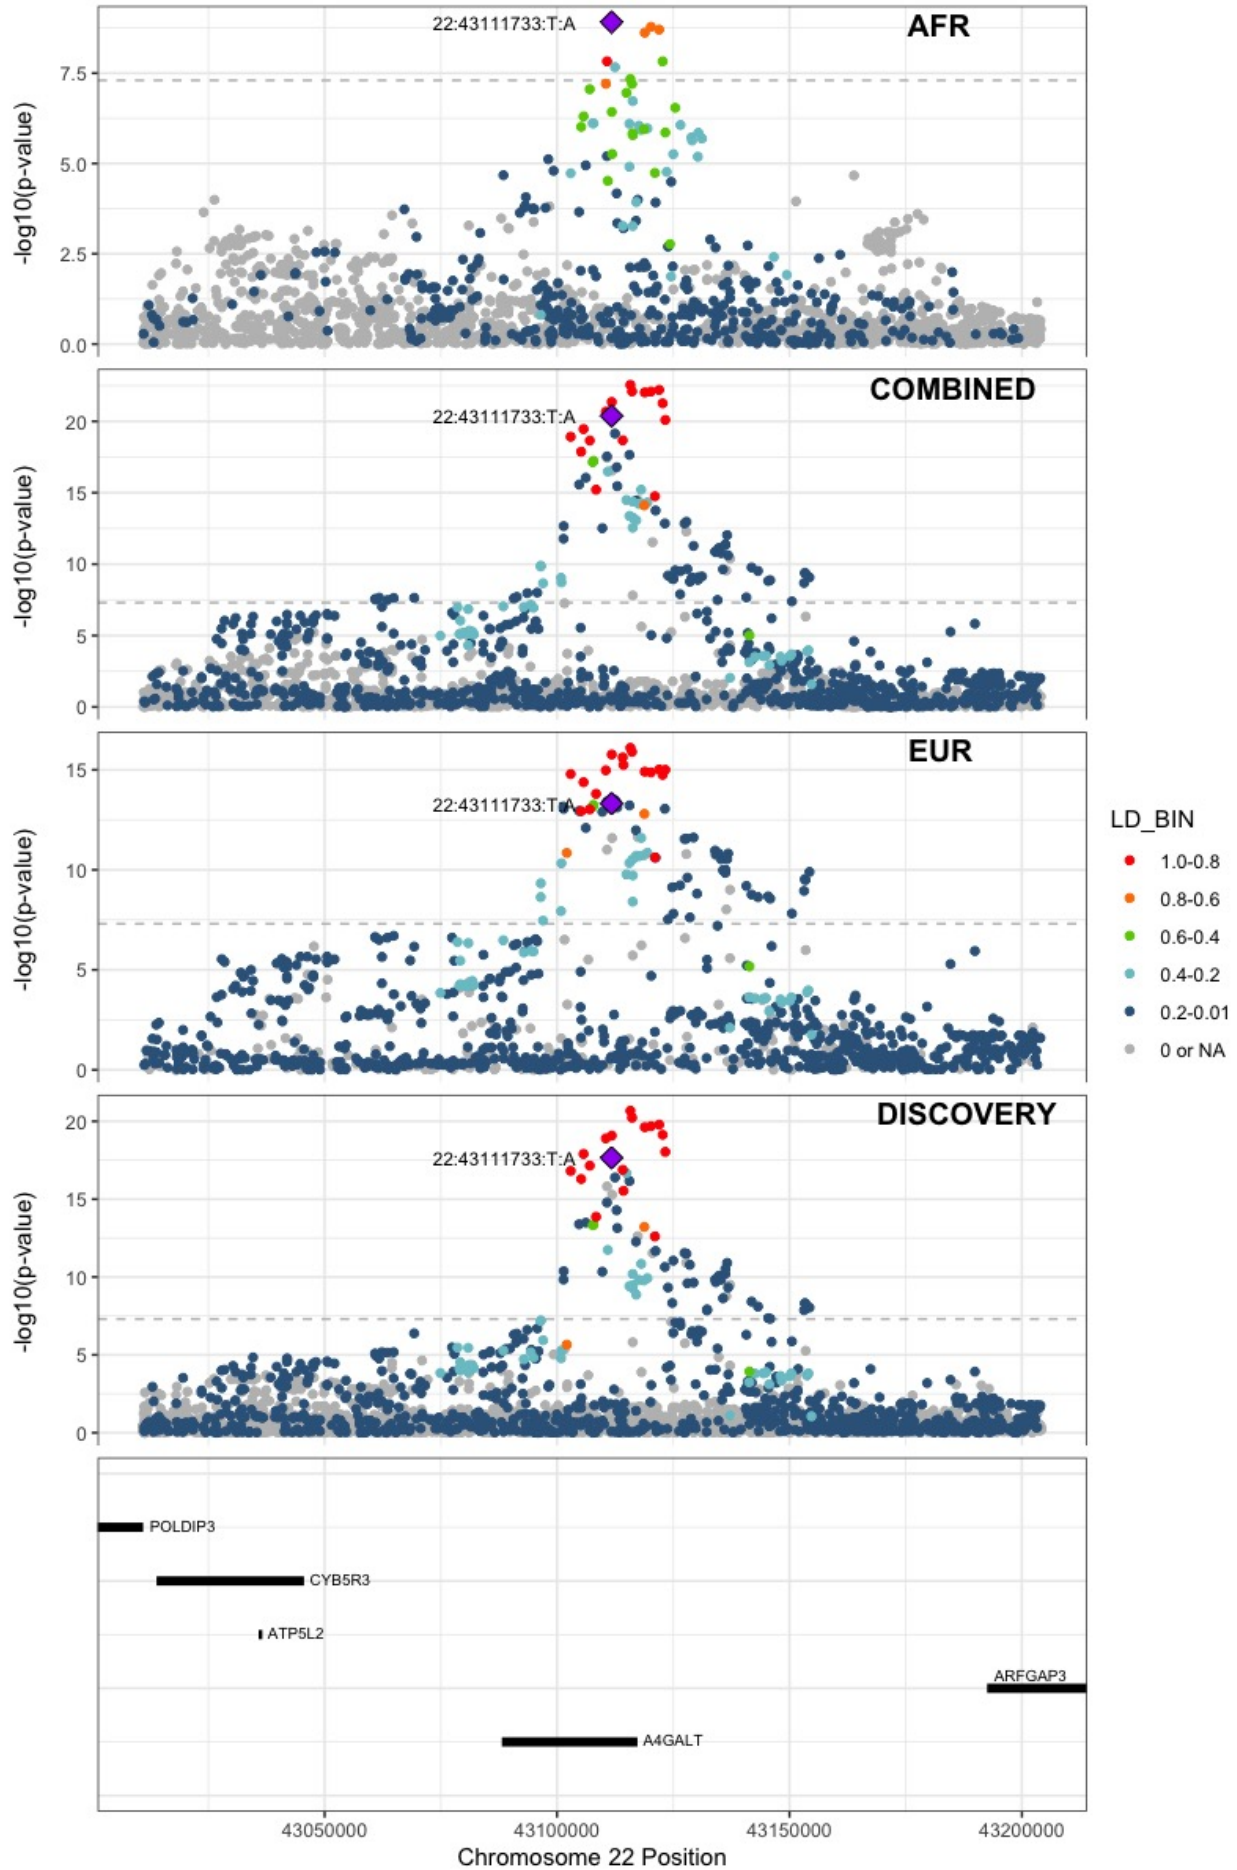

Supplement: Supplementary file [file media-8.pdf]
